# Supplementary material
Source: publisher figshare collection journal article supplement (https://acs.figshare.com/ndownloader/files/8698681)
Supplement: Supplementary file 1 [file 8698681]

Archive with 4 entries (4 files):
- 3u_0M_Af.cif
- 5b_0m_af.cif
- checkcif_3u.pdf
- checkcif_5b.pdf
