# Supplementary material
Source: publisher figshare collection journal article supplement (https://acs.figshare.com/ndownloader/files/8698681)
Supplement: Supplementary file 1 [file 8698681 › 3u_0M_Af.cif]

 
data_BS9_0M_A
 
_audit_creation_method            'SHELXL-2014/7'
_shelx_SHELXL_version_number      '2014/7'
_chemical_name_systematic         ?
_chemical_name_common             ?
_chemical_melting_point           ?
_chemical_formula_moiety          '2(C17 H14 F N3 O2), H2 O'
_chemical_formula_sum
 'C34 H30 F2 N6 O5' 
_chemical_formula_weight          640.64

loop_
 _atom_type_symbol
 _atom_type_description
 _atom_type_scat_dispersion_real
 _atom_type_scat_dispersion_imag
 _atom_type_scat_source
 'C'  'C'   0.0033   0.0016
 'International Tables Vol C Tables 4.2.6.8 and 6.1.1.4'
 'H'  'H'   0.0000   0.0000
 'International Tables Vol C Tables 4.2.6.8 and 6.1.1.4'
 'N'  'N'   0.0061   0.0033
 'International Tables Vol C Tables 4.2.6.8 and 6.1.1.4'
 'O'  'O'   0.0106   0.0060
 'International Tables Vol C Tables 4.2.6.8 and 6.1.1.4'
 'F'  'F'   0.0171   0.0103
 'International Tables Vol C Tables 4.2.6.8 and 6.1.1.4'
 
_space_group_crystal_system       monoclinic
_space_group_IT_number            14
_space_group_name_H-M_alt         'P 21/c'
_space_group_name_Hall            '-P 2ybc'
 
_shelx_space_group_comment
;
The symmetry employed for this shelxl refinement is uniquely defined
by the following loop, which should always be used as a source of
symmetry information in preference to the above space-group names.
They are only intended as comments.
;
 
loop_
 _space_group_symop_operation_xyz
 'x, y, z'
 '-x, y+1/2, -z+1/2'
 '-x, -y, -z'
 'x, -y-1/2, z-1/2'
 
_cell_length_a                    11.975(2)
_cell_length_b                    6.8162(11)
_cell_length_c                    18.711(3)
_cell_angle_alpha                 90
_cell_angle_beta                  98.345(4)
_cell_angle_gamma                 90
_cell_volume                      1511.2(4)
_cell_formula_units_Z             2
_cell_measurement_temperature     294(2)
_cell_measurement_reflns_used     9977
_cell_measurement_theta_min       2.71
_cell_measurement_theta_max       28.25
 
_exptl_crystal_description        block
_exptl_crystal_colour             colorless
_exptl_crystal_density_meas       ?
_exptl_crystal_density_method     ?
_exptl_crystal_density_diffrn     1.408          
_exptl_crystal_F_000              668
_exptl_transmission_factor_min    ?
_exptl_transmission_factor_max    ?
_exptl_crystal_size_max           0.410
_exptl_crystal_size_mid           0.340
_exptl_crystal_size_min           0.220
_exptl_absorpt_coefficient_mu     0.105
_shelx_estimated_absorpt_T_min    0.958
_shelx_estimated_absorpt_T_max    0.977
_exptl_absorpt_correction_type    multi-scan
_exptl_absorpt_correction_T_min   0.93
_exptl_absorpt_correction_T_max   0.96
_exptl_absorpt_process_details    'SADABS; Bruker,2016'

_diffrn_ambient_temperature       294(2)
_diffrn_radiation_wavelength      0.71073
_diffrn_radiation_type            MoK\a
_diffrn_measurement_device_type   'Bruker D8 QUEST PHOTON-100'
_diffrn_measurement_method       '\w and \f'
_diffrn_detector_area_resol_mean  ?
_diffrn_reflns_number             23789
_diffrn_reflns_av_unetI/netI      0.0468
_diffrn_reflns_av_R_equivalents   0.0584
_diffrn_reflns_limit_h_min        -15
_diffrn_reflns_limit_h_max        15
_diffrn_reflns_limit_k_min        -9
_diffrn_reflns_limit_k_max        9
_diffrn_reflns_limit_l_min        -22
_diffrn_reflns_limit_l_max        24
_diffrn_reflns_theta_min          2.588
_diffrn_reflns_theta_max          28.389
_diffrn_reflns_theta_full         25.242
_diffrn_measured_fraction_theta_max   0.988
_diffrn_measured_fraction_theta_full  0.994
_diffrn_reflns_Laue_measured_fraction_max    0.988
_diffrn_reflns_Laue_measured_fraction_full   0.994
_diffrn_reflns_point_group_measured_fraction_max   0.988
_diffrn_reflns_point_group_measured_fraction_full  0.994
_reflns_number_total              3739
_reflns_number_gt                 2632
_reflns_threshold_expression      'I > 2\s(I)'
_reflns_Friedel_coverage          0.000
_reflns_Friedel_fraction_max      .
_reflns_Friedel_fraction_full     .
 
_reflns_special_details
;
 Reflections were merged by SHELXL according to the crystal
 class for the calculation of statistics and refinement.
 
 _reflns_Friedel_fraction is defined as the number of unique
 Friedel pairs measured divided by the number that would be
 possible theoretically, ignoring centric projections and
 systematic absences.
;
 
_computing_data_collection       '<i>APEX3</i> (Bruker, 2016)'
_computing_cell_refinement       '<i>SAINT</i> (Bruker, 2016)'
_computing_data_reduction        'Bruker SAINT'
_computing_structure_solution    '<i>SHELXT</i> (Sheldrick, 2015)'
_computing_structure_refinement  '<i>SHELXL2014</i> (Sheldrick, 2015)'
_computing_molecular_graphics    'Bruker SHELXTL'
_computing_publication_material  'Bruker SHELXTL'

_refine_ls_structure_factor_coef  Fsqd
_refine_ls_matrix_type            full
_refine_ls_weighting_scheme       calc
_refine_ls_weighting_details
'w=1/[\s^2^(Fo^2^)+(0.0376P)^2^+1.6087P] where P=(Fo^2^+2Fc^2^)/3'
_atom_sites_solution_primary      ?
_atom_sites_solution_secondary    ?
_atom_sites_solution_hydrogens    mixed
_refine_ls_hydrogen_treatment     mixed
_refine_ls_extinction_method      none
_refine_ls_extinction_coef        .
_refine_ls_number_reflns          3739
_refine_ls_number_parameters      224
_refine_ls_number_restraints      2
_refine_ls_R_factor_all           0.0975
_refine_ls_R_factor_gt            0.0649
_refine_ls_wR_factor_ref          0.1637
_refine_ls_wR_factor_gt           0.1483
_refine_ls_goodness_of_fit_ref    1.097
_refine_ls_restrained_S_all       1.097
_refine_ls_shift/su_max           0.000
_refine_ls_shift/su_mean          0.000
 
loop_
 _atom_site_label
 _atom_site_type_symbol
 _atom_site_fract_x
 _atom_site_fract_y
 _atom_site_fract_z
 _atom_site_U_iso_or_equiv
 _atom_site_adp_type
 _atom_site_occupancy
 _atom_site_site_symmetry_order  
 _atom_site_calc_flag
 _atom_site_refinement_flags_posn
 _atom_site_refinement_flags_adp
 _atom_site_refinement_flags_occupancy
 _atom_site_disorder_assembly
 _atom_site_disorder_group
C1 C 0.67302(18) 0.4052(3) 0.60131(12) 0.0326(5) Uani 1 1 d . . . . .
C2 C 0.66764(17) 0.5551(3) 0.64973(12) 0.0333(5) Uani 1 1 d . . . . .
C3 C 0.5041(2) 0.6906(4) 0.70284(14) 0.0427(6) Uani 1 1 d . . . . .
H3 H 0.5446 0.7891 0.7295 0.051 Uiso 1 1 calc R U . . .
C4 C 0.3921(2) 0.6694(4) 0.70403(15) 0.0472(6) Uani 1 1 d . . . . .
H4 H 0.3547 0.7544 0.7314 0.057 Uiso 1 1 calc R U . . .
C5 C 0.3322(2) 0.5186(4) 0.66384(14) 0.0438(6) Uani 1 1 d . . . . .
H5 H 0.2554 0.5045 0.6659 0.053 Uiso 1 1 calc R U . . .
C6 C 0.38283(19) 0.3928(4) 0.62218(14) 0.0399(6) Uani 1 1 d . . . . .
C7 C 0.49978(18) 0.4179(3) 0.62012(12) 0.0329(5) Uani 1 1 d . . . . .
C8 C 0.3212(2) 0.2323(5) 0.57858(19) 0.0653(9) Uani 1 1 d . . . . .
H8A H 0.2438 0.2310 0.5866 0.098 Uiso 1 1 calc R U . . .
H8B H 0.3556 0.1085 0.5928 0.098 Uiso 1 1 calc R U . . .
H8C H 0.3245 0.2544 0.5283 0.098 Uiso 1 1 calc R U . . .
C9 C 0.77078(18) 0.3427(3) 0.56759(13) 0.0342(5) Uani 1 1 d . . . . .
C10 C 0.8806(2) 0.3639(4) 0.60240(15) 0.0437(6) Uani 1 1 d . . . . .
H10 H 0.8933 0.4126 0.6493 0.052 Uiso 1 1 calc R U . . .
C11 C 0.9712(2) 0.3135(4) 0.56813(16) 0.0514(7) Uani 1 1 d . . . . .
H11 H 1.0449 0.3277 0.5914 0.062 Uiso 1 1 calc R U . . .
C12 C 0.9500(2) 0.2424(4) 0.49956(16) 0.0468(6) Uani 1 1 d . . . . .
C13 C 0.8436(2) 0.2131(4) 0.46372(15) 0.0473(6) Uani 1 1 d . . . . .
H13 H 0.8321 0.1605 0.4174 0.057 Uiso 1 1 calc R U . . .
C14 C 0.7532(2) 0.2643(4) 0.49859(14) 0.0409(6) Uani 1 1 d . . . . .
H14 H 0.6799 0.2458 0.4753 0.049 Uiso 1 1 calc R U . . .
C15 C 0.81817(19) 0.6508(4) 0.74311(14) 0.0420(6) Uani 1 1 d . . . . .
C16 C 0.8738(2) 0.9453(5) 0.70084(16) 0.0592(8) Uani 1 1 d . . . . .
H16A H 0.9398 0.9556 0.6765 0.071 Uiso 1 1 calc R U . . .
H16B H 0.8588 1.0728 0.7204 0.071 Uiso 1 1 calc R U . . .
C17 C 0.7731(2) 0.8756(4) 0.64895(16) 0.0497(7) Uani 1 1 d . . . . .
H17A H 0.7105 0.9669 0.6467 0.060 Uiso 1 1 calc R U . . .
H17B H 0.7921 0.8565 0.6008 0.060 Uiso 1 1 calc R U . . .
F1 F 1.03910(14) 0.1953(3) 0.46524(11) 0.0700(5) Uani 1 1 d . . . . .
N1 N 0.56893(15) 0.3196(3) 0.58344(11) 0.0375(5) Uani 1 1 d . . . . .
N2 N 0.55637(15) 0.5646(3) 0.66164(10) 0.0335(4) Uani 1 1 d . . . . .
N3 N 0.74743(16) 0.6905(3) 0.68155(11) 0.0373(5) Uani 1 1 d . . . . .
O1 O 0.89165(15) 0.8007(3) 0.75755(11) 0.0561(5) Uani 1 1 d . . . . .
O2 O 0.81921(17) 0.5094(3) 0.78098(11) 0.0620(6) Uani 1 1 d . . . . .
O1W O 0.4712(4) 0.1042(7) 0.4488(3) 0.0654(12) Uani 0.5 1 d D . P . .
H1W H 0.515(5) 0.137(11) 0.491(2) 0.079 Uiso 0.5 1 d D U P . .
H2W H 0.462(6) -0.027(3) 0.445(4) 0.079 Uiso 0.5 1 d D U P . .
 
loop_
 _atom_site_aniso_label
 _atom_site_aniso_U_11
 _atom_site_aniso_U_22
 _atom_site_aniso_U_33
 _atom_site_aniso_U_23
 _atom_site_aniso_U_13
 _atom_site_aniso_U_12
C1 0.0320(10) 0.0291(12) 0.0369(12) 0.0031(10) 0.0061(9) -0.0005(9)
C2 0.0298(10) 0.0309(12) 0.0393(12) -0.0003(10) 0.0060(9) -0.0036(9)
C3 0.0474(13) 0.0361(14) 0.0460(14) -0.0090(11) 0.0110(11) -0.0012(11)
C4 0.0446(13) 0.0461(16) 0.0529(16) -0.0070(13) 0.0143(11) 0.0068(12)
C5 0.0318(11) 0.0529(16) 0.0474(14) 0.0030(12) 0.0078(10) 0.0035(11)
C6 0.0320(11) 0.0411(14) 0.0460(14) 0.0022(11) 0.0039(10) -0.0017(10)
C7 0.0335(11) 0.0281(12) 0.0369(12) 0.0018(10) 0.0040(9) -0.0019(9)
C8 0.0369(13) 0.074(2) 0.085(2) -0.0241(18) 0.0074(14) -0.0154(14)
C9 0.0350(11) 0.0256(11) 0.0429(13) 0.0035(10) 0.0085(9) -0.0005(9)
C10 0.0373(12) 0.0446(15) 0.0496(15) -0.0040(12) 0.0073(10) 0.0016(11)
C11 0.0339(12) 0.0547(18) 0.0662(18) -0.0019(15) 0.0091(12) 0.0028(12)
C12 0.0447(13) 0.0355(14) 0.0652(18) 0.0062(13) 0.0250(12) 0.0086(11)
C13 0.0584(16) 0.0406(15) 0.0459(15) -0.0007(12) 0.0182(12) 0.0021(12)
C14 0.0391(12) 0.0370(14) 0.0474(14) -0.0014(11) 0.0087(10) -0.0007(10)
C15 0.0350(12) 0.0479(16) 0.0431(14) -0.0029(12) 0.0059(10) -0.0054(11)
C16 0.0583(17) 0.0600(19) 0.0598(18) 0.0021(15) 0.0101(14) -0.0280(15)
C17 0.0487(14) 0.0415(15) 0.0583(17) 0.0062(13) 0.0057(12) -0.0142(12)
F1 0.0598(10) 0.0679(12) 0.0916(14) -0.0021(10) 0.0418(9) 0.0119(9)
N1 0.0330(9) 0.0347(11) 0.0448(12) -0.0053(9) 0.0061(8) -0.0036(8)
N2 0.0321(9) 0.0305(10) 0.0379(10) -0.0015(8) 0.0053(8) -0.0018(8)
N3 0.0373(10) 0.0326(11) 0.0408(11) 0.0002(9) 0.0017(8) -0.0094(8)
O1 0.0464(10) 0.0630(14) 0.0557(12) -0.0014(10) -0.0032(8) -0.0206(9)
O2 0.0621(12) 0.0654(15) 0.0549(12) 0.0191(11) -0.0035(9) -0.0114(10)
O1W 0.072(3) 0.059(3) 0.064(3) -0.006(2) 0.004(2) -0.006(2)
 
_geom_special_details
;
 All esds (except the esd in the dihedral angle between two l.s. planes)
 are estimated using the full covariance matrix.  The cell esds are taken
 into account individually in the estimation of esds in distances, angles
 and torsion angles; correlations between esds in cell parameters are only
 used when they are defined by crystal symmetry.  An approximate (isotropic)
 treatment of cell esds is used for estimating esds involving l.s. planes.
;
 
loop_
 _geom_bond_atom_site_label_1
 _geom_bond_atom_site_label_2
 _geom_bond_distance
 _geom_bond_site_symmetry_2
 _geom_bond_publ_flag
C1 N1 1.373(3) . ?
C1 C2 1.374(3) . ?
C1 C9 1.471(3) . ?
C2 N2 1.384(3) . ?
C2 N3 1.398(3) . ?
C3 C4 1.352(3) . ?
C3 N2 1.365(3) . ?
C3 H3 0.9300 . ?
C4 C5 1.407(4) . ?
C4 H4 0.9300 . ?
C5 C6 1.360(4) . ?
C5 H5 0.9300 . ?
C6 C7 1.417(3) . ?
C6 C8 1.494(4) . ?
C7 N1 1.331(3) . ?
C7 N2 1.382(3) . ?
C8 H8A 0.9600 . ?
C8 H8B 0.9600 . ?
C8 H8C 0.9600 . ?
C9 C14 1.385(3) . ?
C9 C10 1.388(3) . ?
C10 C11 1.381(4) . ?
C10 H10 0.9300 . ?
C11 C12 1.360(4) . ?
C11 H11 0.9300 . ?
C12 F1 1.361(3) . ?
C12 C13 1.366(4) . ?
C13 C14 1.387(3) . ?
C13 H13 0.9300 . ?
C14 H14 0.9300 . ?
C15 O2 1.195(3) . ?
C15 O1 1.350(3) . ?
C15 N3 1.354(3) . ?
C16 O1 1.441(4) . ?
C16 C17 1.511(4) . ?
C16 H16A 0.9700 . ?
C16 H16B 0.9700 . ?
C17 N3 1.454(3) . ?
C17 H17A 0.9700 . ?
C17 H17B 0.9700 . ?
O1W H1W 0.90(2) . ?
O1W H2W 0.90(2) . ?
 
loop_
 _geom_angle_atom_site_label_1
 _geom_angle_atom_site_label_2
 _geom_angle_atom_site_label_3
 _geom_angle
 _geom_angle_site_symmetry_1
 _geom_angle_site_symmetry_3
 _geom_angle_publ_flag
N1 C1 C2 110.42(19) . . ?
N1 C1 C9 121.6(2) . . ?
C2 C1 C9 127.9(2) . . ?
C1 C2 N2 106.23(19) . . ?
C1 C2 N3 132.7(2) . . ?
N2 C2 N3 121.0(2) . . ?
C4 C3 N2 118.6(2) . . ?
C4 C3 H3 120.7 . . ?
N2 C3 H3 120.7 . . ?
C3 C4 C5 120.0(2) . . ?
C3 C4 H4 120.0 . . ?
C5 C4 H4 120.0 . . ?
C6 C5 C4 122.1(2) . . ?
C6 C5 H5 118.9 . . ?
C4 C5 H5 118.9 . . ?
C5 C6 C7 117.7(2) . . ?
C5 C6 C8 123.3(2) . . ?
C7 C6 C8 119.1(2) . . ?
N1 C7 N2 111.30(19) . . ?
N1 C7 C6 130.1(2) . . ?
N2 C7 C6 118.6(2) . . ?
C6 C8 H8A 109.5 . . ?
C6 C8 H8B 109.5 . . ?
H8A C8 H8B 109.5 . . ?
C6 C8 H8C 109.5 . . ?
H8A C8 H8C 109.5 . . ?
H8B C8 H8C 109.5 . . ?
C14 C9 C10 118.9(2) . . ?
C14 C9 C1 119.3(2) . . ?
C10 C9 C1 121.8(2) . . ?
C11 C10 C9 120.7(3) . . ?
C11 C10 H10 119.6 . . ?
C9 C10 H10 119.6 . . ?
C12 C11 C10 118.3(2) . . ?
C12 C11 H11 120.8 . . ?
C10 C11 H11 120.8 . . ?
C11 C12 F1 118.5(2) . . ?
C11 C12 C13 123.2(2) . . ?
F1 C12 C13 118.3(3) . . ?
C12 C13 C14 117.9(3) . . ?
C12 C13 H13 121.0 . . ?
C14 C13 H13 121.0 . . ?
C9 C14 C13 120.8(2) . . ?
C9 C14 H14 119.6 . . ?
C13 C14 H14 119.6 . . ?
O2 C15 O1 122.8(2) . . ?
O2 C15 N3 128.1(2) . . ?
O1 C15 N3 109.2(2) . . ?
O1 C16 C17 106.1(2) . . ?
O1 C16 H16A 110.5 . . ?
C17 C16 H16A 110.5 . . ?
O1 C16 H16B 110.5 . . ?
C17 C16 H16B 110.5 . . ?
H16A C16 H16B 108.7 . . ?
N3 C17 C16 101.6(2) . . ?
N3 C17 H17A 111.5 . . ?
C16 C17 H17A 111.5 . . ?
N3 C17 H17B 111.5 . . ?
C16 C17 H17B 111.5 . . ?
H17A C17 H17B 109.3 . . ?
C7 N1 C1 105.74(19) . . ?
C3 N2 C7 123.02(19) . . ?
C3 N2 C2 130.7(2) . . ?
C7 N2 C2 106.30(18) . . ?
C15 N3 C2 122.4(2) . . ?
C15 N3 C17 112.7(2) . . ?
C2 N3 C17 124.6(2) . . ?
C15 O1 C16 110.3(2) . . ?
H1W O1W H2W 112(6) . . ?
 
loop_
 _geom_torsion_atom_site_label_1
 _geom_torsion_atom_site_label_2
 _geom_torsion_atom_site_label_3
 _geom_torsion_atom_site_label_4
 _geom_torsion
 _geom_torsion_site_symmetry_1
 _geom_torsion_site_symmetry_2
 _geom_torsion_site_symmetry_3
 _geom_torsion_site_symmetry_4
 _geom_torsion_publ_flag
N1 C1 C2 N2 -0.7(3) . . . . ?
C9 C1 C2 N2 176.0(2) . . . . ?
N1 C1 C2 N3 -176.8(2) . . . . ?
C9 C1 C2 N3 -0.1(4) . . . . ?
N2 C3 C4 C5 0.6(4) . . . . ?
C3 C4 C5 C6 -1.0(4) . . . . ?
C4 C5 C6 C7 -0.1(4) . . . . ?
C4 C5 C6 C8 -179.6(3) . . . . ?
C5 C6 C7 N1 -178.7(2) . . . . ?
C8 C6 C7 N1 0.9(4) . . . . ?
C5 C6 C7 N2 1.6(3) . . . . ?
C8 C6 C7 N2 -178.9(2) . . . . ?
N1 C1 C9 C14 28.0(3) . . . . ?
C2 C1 C9 C14 -148.4(2) . . . . ?
N1 C1 C9 C10 -153.4(2) . . . . ?
C2 C1 C9 C10 30.2(4) . . . . ?
C14 C9 C10 C11 2.0(4) . . . . ?
C1 C9 C10 C11 -176.6(2) . . . . ?
C9 C10 C11 C12 -0.1(4) . . . . ?
C10 C11 C12 F1 179.0(2) . . . . ?
C10 C11 C12 C13 -2.0(4) . . . . ?
C11 C12 C13 C14 2.0(4) . . . . ?
F1 C12 C13 C14 -179.0(2) . . . . ?
C10 C9 C14 C13 -1.9(4) . . . . ?
C1 C9 C14 C13 176.7(2) . . . . ?
C12 C13 C14 C9 0.0(4) . . . . ?
O1 C16 C17 N3 -2.2(3) . . . . ?
N2 C7 N1 C1 -0.3(3) . . . . ?
C6 C7 N1 C1 180.0(2) . . . . ?
C2 C1 N1 C7 0.7(3) . . . . ?
C9 C1 N1 C7 -176.3(2) . . . . ?
C4 C3 N2 C7 1.0(4) . . . . ?
C4 C3 N2 C2 178.8(2) . . . . ?
N1 C7 N2 C3 178.1(2) . . . . ?
C6 C7 N2 C3 -2.2(3) . . . . ?
N1 C7 N2 C2 -0.2(3) . . . . ?
C6 C7 N2 C2 179.6(2) . . . . ?
C1 C2 N2 C3 -177.5(2) . . . . ?
N3 C2 N2 C3 -0.9(4) . . . . ?
C1 C2 N2 C7 0.5(2) . . . . ?
N3 C2 N2 C7 177.2(2) . . . . ?
O2 C15 N3 C2 -5.5(4) . . . . ?
O1 C15 N3 C2 174.8(2) . . . . ?
O2 C15 N3 C17 -178.7(3) . . . . ?
O1 C15 N3 C17 1.6(3) . . . . ?
C1 C2 N3 C15 -86.9(3) . . . . ?
N2 C2 N3 C15 97.5(3) . . . . ?
C1 C2 N3 C17 85.4(4) . . . . ?
N2 C2 N3 C17 -90.1(3) . . . . ?
C16 C17 N3 C15 0.5(3) . . . . ?
C16 C17 N3 C2 -172.5(2) . . . . ?
O2 C15 O1 C16 177.2(3) . . . . ?
N3 C15 O1 C16 -3.2(3) . . . . ?
C17 C16 O1 C15 3.4(3) . . . . ?
 
loop_
 _geom_hbond_atom_site_label_D 
 _geom_hbond_atom_site_label_H 
 _geom_hbond_atom_site_label_A 
 _geom_hbond_distance_DH 
 _geom_hbond_distance_HA 
 _geom_hbond_distance_DA 
 _geom_hbond_angle_DHA 
 _geom_hbond_site_symmetry_A 
O1W H1W N1  0.90(2) 2.16(4) 3.002(5) 155(7) .
O1W H2W N1  0.90(2) 2.08(2) 2.976(5) 170(7) 3_656
 
_refine_diff_density_max    0.212
_refine_diff_density_min   -0.234
_refine_diff_density_rms    0.050

_shelx_res_file
;

    BS9_0M_A.res created by SHELXL-2014/7


TITL BS9_0m_a.res in P2(1)/c
CELL  0.71073  11.9755   6.8162  18.7110   90.000   98.345   90.000
ZERR    2.000   0.0020   0.0011   0.0031    0.000    0.004    0.000
LATT 1
SYMM -X, 1/2+Y, 1/2-Z
SFAC C  H  N  O  F
UNIT 68  60  12  10  4
L.S. 10
ACTA
BOND $H
SIZE 0.41 0.34 0.22
FMAP 2
PLAN 5
EQIV $1 -x+1, -y, -z+1
HTAB O1W N1
HTAB O1W N1_$1
CONF
DFIX 0.89 0.02 O1W H1W O1W H2W
TEMP 21
WGHT    0.037600    1.608700
FVAR       1.05518
MOLE 1
C1    1    0.673025    0.405187    0.601308    11.00000    0.03202    0.02911 =
         0.03692    0.00312    0.00611   -0.00052
C2    1    0.667644    0.555146    0.649731    11.00000    0.02984    0.03090 =
         0.03931   -0.00034    0.00602   -0.00355
C3    1    0.504077    0.690642    0.702836    11.00000    0.04736    0.03608 =
         0.04596   -0.00902    0.01097   -0.00124
AFIX  43
H3    2    0.544635    0.789064    0.729523    11.00000   -1.20000
AFIX   0
C4    1    0.392120    0.669392    0.704033    11.00000    0.04460    0.04613 =
         0.05294   -0.00705    0.01432    0.00683
AFIX  43
H4    2    0.354738    0.754393    0.731402    11.00000   -1.20000
AFIX   0
C5    1    0.332159    0.518582    0.663844    11.00000    0.03176    0.05292 =
         0.04742    0.00298    0.00775    0.00353
AFIX  43
H5    2    0.255431    0.504546    0.665852    11.00000   -1.20000
AFIX   0
C6    1    0.382825    0.392750    0.622176    11.00000    0.03204    0.04110 =
         0.04603    0.00218    0.00394   -0.00172
C7    1    0.499784    0.417945    0.620118    11.00000    0.03346    0.02815 =
         0.03688    0.00180    0.00405   -0.00190
C8    1    0.321165    0.232319    0.578584    11.00000    0.03692    0.07363 =
         0.08484   -0.02408    0.00744   -0.01545
AFIX 137
H8A   2    0.243799    0.230953    0.586626    11.00000   -1.50000
H8B   2    0.355604    0.108507    0.592850    11.00000   -1.50000
H8C   2    0.324467    0.254396    0.528261    11.00000   -1.50000
AFIX   0
C9    1    0.770778    0.342718    0.567589    11.00000    0.03503    0.02555 =
         0.04289    0.00352    0.00850   -0.00049
C10   1    0.880606    0.363914    0.602395    11.00000    0.03726    0.04455 =
         0.04957   -0.00398    0.00730    0.00158
AFIX  43
H10   2    0.893348    0.412619    0.649301    11.00000   -1.20000
AFIX   0
C11   1    0.971204    0.313459    0.568131    11.00000    0.03385    0.05470 =
         0.06616   -0.00191    0.00905    0.00282
AFIX  43
H11   2    1.044850    0.327706    0.591358    11.00000   -1.20000
AFIX   0
C12   1    0.949990    0.242409    0.499556    11.00000    0.04467    0.03546 =
         0.06519    0.00615    0.02504    0.00863
C13   1    0.843563    0.213110    0.463718    11.00000    0.05840    0.04060 =
         0.04590   -0.00072    0.01819    0.00212
AFIX  43
H13   2    0.832051    0.160451    0.417379    11.00000   -1.20000
AFIX   0
C14   1    0.753220    0.264335    0.498586    11.00000    0.03906    0.03697 =
         0.04740   -0.00143    0.00867   -0.00074
AFIX  43
H14   2    0.679917    0.245819    0.475338    11.00000   -1.20000
AFIX   0
C15   1    0.818172    0.650827    0.743107    11.00000    0.03497    0.04787 =
         0.04308   -0.00288    0.00586   -0.00536
C16   1    0.873773    0.945313    0.700839    11.00000    0.05829    0.06002 =
         0.05981    0.00208    0.01006   -0.02798
AFIX  23
H16A  2    0.939790    0.955599    0.676544    11.00000   -1.20000
H16B  2    0.858795    1.072816    0.720427    11.00000   -1.20000
AFIX   0
C17   1    0.773077    0.875637    0.648948    11.00000    0.04868    0.04154 =
         0.05834    0.00617    0.00574   -0.01423
AFIX  23
H17A  2    0.710506    0.966877    0.646707    11.00000   -1.20000
H17B  2    0.792140    0.856523    0.600785    11.00000   -1.20000
AFIX   0
F1    5    1.039104    0.195284    0.465245    11.00000    0.05980    0.06790 =
         0.09155   -0.00209    0.04183    0.01187
N1    3    0.568931    0.319598    0.583442    11.00000    0.03303    0.03472 =
         0.04484   -0.00535    0.00608   -0.00360
N2    3    0.556372    0.564633    0.661643    11.00000    0.03215    0.03050 =
         0.03786   -0.00151    0.00528   -0.00183
N3    3    0.747425    0.690489    0.681547    11.00000    0.03727    0.03255 =
         0.04080    0.00020    0.00175   -0.00937
O1    4    0.891651    0.800729    0.757546    11.00000    0.04642    0.06301 =
         0.05570   -0.00143   -0.00320   -0.02058
O2    4    0.819212    0.509394    0.780976    11.00000    0.06205    0.06544 =
         0.05487    0.01908   -0.00352   -0.01138
MOLE 2
O1W   4    0.471227    0.104224    0.448843    10.50000    0.07159    0.05859 =
         0.06427   -0.00588    0.00373   -0.00559
H1W   2    0.514930    0.136797    0.490570    10.50000   -1.20000
H2W   2    0.461951   -0.026865    0.444559    10.50000   -1.20000
HKLF 4

REM  BS9_0m_a.res in P2(1)/c
REM R1 =  0.0649 for    2632 Fo > 4sig(Fo)  and  0.0975 for all    3739 data
REM    224 parameters refined using      2 restraints

END

WGHT      0.0375      1.6071

REM Highest difference peak  0.212,  deepest hole -0.234,  1-sigma level  0.050
Q1    1   0.9733  0.4762  0.4883  11.00000  0.05    0.21
Q2    1   0.3819  0.6586  0.7594  11.00000  0.05    0.20
Q3    1   0.3333  0.6502  0.6592  11.00000  0.05    0.19
Q4    1   0.7283  0.4753  0.4614  11.00000  0.05    0.19
Q5    1   0.3615  0.1234  0.5596  11.00000  0.05    0.18
;
_shelx_res_checksum   82807

_shelx_hkl_file
;
  -2   0   0  174.38   11.40
  -2   0   0  174.48   11.50
  -2   0   0  177.08   11.40
   2   0   0  181.98   11.40
   2   0   0  169.88   11.40
   2   0   0  178.08   11.50
   2   0   0  176.78   11.40
  -2   0   0  180.18   11.40
  -3   0   0 1034.20   63.49
  -3   0   0  951.60   63.49
  -3   0   0 1007.40   63.49
   3   0   0 1029.50   63.49
   3   0   0  973.70   63.49
   3   0   0 1009.90   63.49
   3   0   0  997.00   63.49
  -4   0   0   87.19    7.20
   4   0   0   74.39    6.70
   4   0   0   99.09    6.80
  -4   0   0   97.99    6.60
   4   0   0   98.09    6.90
   4   0   0   99.99    6.80
  -4   0   0   96.69    6.50
  -4   0   0   80.49    6.50
  -5   0   0   65.79    5.70
   5   0   0   53.89    6.30
   5   0   0   63.49    6.00
   5   0   0   84.89    6.00
  -5   0   0   74.29    5.60
  -5   0   0   79.99    6.20
   5   0   0   77.69    6.10
  -5   0   0   62.79    5.50
  -6   0   0  529.35   33.20
   6   0   0  517.65   33.40
  -6   0   0  502.85   33.10
  -6   0   0  505.55   33.50
  -6   0   0  541.45   33.40
   6   0   0  529.55   33.40
   6   0   0  508.85   33.40
   6   0   0  487.35   33.40
   7   0   0  379.46   24.00
  -7   0   0  368.36   23.60
  -7   0   0  327.87   24.10
  -7   0   0  368.96   23.60
   7   0   0  353.96   24.00
   7   0   0  360.66   24.00
   7   0   0  365.96   24.00
  -7   0   0  360.26   23.60
  -8   0   0   14.10    2.90
  -8   0   0   12.00    4.10
   8   0   0   11.10    4.10
   8   0   0   23.50    4.00
   8   0   0   14.30    4.20
   8   0   0   20.10    4.40
  -8   0   0   17.70    3.30
  -8   0   0   19.70    3.30
  -9   0   0  294.77   19.80
   9   0   0  251.77   20.80
  -9   0   0  261.17   19.80
   9   0   0  347.37   21.30
   9   0   0  308.77   20.90
   9   0   0  289.27   20.40
  -9   0   0  307.47   20.00
  10   0   0  232.78   18.30
 -10   0   0  243.38   17.50
 -10   0   0  229.88   17.40
  10   0   0  292.37   19.80
  10   0   0  261.37   20.00
  11   0   0  704.83   47.90
 -11   0   0  726.53   45.60
 -11   0   0  718.03   45.50
  11   0   0  728.13   47.60
 -11   0   0  611.64   45.40
 -12   0   0  126.39   11.70
 -12   0   0  125.29   11.20
  12   0   0  125.79   19.30
  12   0   0  118.99   13.00
 -13   0   0  134.89   12.50
  13   0   0  143.19   15.20
 -13   0   0  154.88   13.60
 -14   0   0  377.06   29.00
  14   0   0  428.56   30.70
 -14   0   0  425.56   28.90
  15   0   0   85.89   15.70
 -15   0   0   71.19   11.40
   0  -1   0    0.00    0.70
   0  -1   0   -2.00    1.70
   0   1   0   -0.80    1.80
   0   1   0    1.30    0.70
  -1  -1   0  288.57   18.10
   1  -1   0  263.37   18.20
   1  -1   0  283.07   18.40
  -1  -1   0  289.27   18.00
  -1  -1   0  263.27   17.90
   1   1   0  281.27   17.90
  -1   1   0  270.87   18.20
   1   1   0  295.57   18.00
   1   1   0  289.37   18.20
   1   1   0  274.97   17.90
  -1   1   0  309.87   18.40
  -1   1   0  276.07   18.40
  -2  -1   0   44.60    3.40
   2  -1   0   47.80    4.40
  -2  -1   0   51.99    3.50
   2  -1   0   54.59    4.70
   2  -1   0   40.20    4.20
   2  -1   0   43.60    3.70
  -2  -1   0   47.10    3.40
  -2  -1   0   41.60    3.90
   2   1   0   43.20    4.00
   2   1   0   50.39    3.50
  -2   1   0   51.79    4.70
   2   1   0   51.59    3.60
   2   1   0   52.29    3.40
   2   1   0   45.00    3.70
  -2   1   0   54.29    4.40
   3  -1   0  121.19   10.10
  -3  -1   0  160.68    9.40
  -3  -1   0  128.39    9.70
  -3  -1   0  149.49    9.40
  -3  -1   0  142.29    9.30
   3   1   0  152.88    9.50
   3   1   0  146.69    9.40
  -3   1   0  141.79   10.10
   3   1   0  128.19    9.80
   4  -1   0  523.55   32.20
  -4  -1   0  461.45   32.10
  -4  -1   0  482.65   32.00
   4  -1   0  489.05   32.10
   4  -1   0  537.75   32.40
  -4  -1   0  513.75   32.00
   4   1   0  517.95   32.10
   4   1   0  472.15   32.30
  -4   1   0  470.95   32.40
  -4   1   0  522.95   32.10
   4   1   0  502.05   32.00
  -4   1   0  502.75   32.40
   4   1   0  508.25   32.10
  -4   1   0  485.45   32.00
  -5  -1   0   19.90    2.70
  -5  -1   0   15.80    2.30
  -5  -1   0   19.90    2.90
  -5  -1   0   12.00    2.40
   5  -1   0   29.00    4.40
  -5   1   0   21.70    3.50
   5   1   0   19.90    2.80
   5   1   0   25.60    3.50
  -5   1   0   24.50    3.50
   5   1   0   14.10    3.10
   5   1   0   17.50    3.10
  -6  -1   0   43.60    4.60
   6  -1   0   52.19    5.80
   6  -1   0   56.19    5.90
  -6  -1   0   47.00    4.40
   6  -1   0   35.90    5.80
  -6  -1   0   58.29    5.20
  -6  -1   0   47.80    4.60
   6   1   0   38.80    5.90
   6   1   0   50.49    5.30
  -6   1   0   41.80    7.00
   6   1   0   54.89    4.70
  -6   1   0   45.50    5.00
   6   1   0   56.89    5.30
  -6   1   0   44.20    5.00
  -7  -1   0   69.89    6.60
  -7  -1   0   64.49    6.20
  -7  -1   0   57.39    6.10
   7   1   0   81.89    6.40
   7   1   0   66.89    6.90
   7   1   0   72.59    7.20
   7   1   0   50.89    7.50
  -7   1   0   74.19    6.40
  -7   1   0   85.59    6.70
   8  -1   0  339.47   24.10
  -8  -1   0  323.17   23.50
  -8  -1   0  345.07   23.20
  -8  -1   0  381.06   23.10
   8  -1   0  328.57   24.00
   8  -1   0  343.77   24.00
  -8  -1   0  353.96   23.00
  -8   1   0  339.57   23.10
   8   1   0  319.07   23.90
   8   1   0  361.46   23.30
   8   1   0  371.36   23.70
   8   1   0  382.26   23.70
  -8   1   0  349.27   23.10
  -9  -1   0    0.30    3.10
  -9  -1   0    8.30    3.10
   9  -1   0    9.40    4.90
   9  -1   0    9.30    5.60
   9  -1   0    5.50    5.60
   9   1   0    0.40    4.50
   9   1   0    1.00    4.90
  -9   1   0    7.50    3.30
   9   1   0    2.20    3.50
  -9   1   0   11.40    3.40
 -10  -1   0  110.79    8.80
  10  -1   0  111.09   13.50
 -10  -1   0   90.19    8.80
  10  -1   0  113.39   13.10
 -10  -1   0   79.39    9.40
  10  -1   0   90.39   11.50
 -10   1   0   84.79    8.90
  10   1   0  120.49   11.20
 -10   1   0   87.49    9.30
 -10   1   0  114.19   12.80
 -11  -1   0   87.89    8.90
  11  -1   0   65.69   11.70
 -11  -1   0   80.99    8.50
  11  -1   0   80.69   12.70
 -11  -1   0   76.49    8.90
 -11   1   0  110.79   14.90
 -11   1   0   74.59    9.60
 -11   1   0   77.09    8.70
  11   1   0  105.49   14.60
 -12  -1   0   35.70    6.00
  12  -1   0   18.60   10.10
 -12  -1   0   25.80    5.20
  12  -1   0   31.40    7.30
 -12  -1   0   24.90    5.70
 -12   1   0   53.19   11.80
  12   1   0   29.60    6.50
 -12   1   0   17.10    6.10
 -12   1   0   35.70    5.90
 -13  -1   0   13.80    5.50
 -13  -1   0   16.60    5.20
  13  -1   0   19.50    7.60
 -13  -1   0   18.50    5.70
 -13   1   0   16.50    6.70
  13   1   0   27.50    6.70
 -14  -1   0    5.10    6.60
 -14  -1   0    7.70    5.60
  14  -1   0   18.40    8.10
 -14  -1   0   -2.60    6.10
  14   1   0   13.90    6.90
 -14   1   0   18.50    6.20
 -15  -1   0   14.20    7.60
 -15  -1   0   35.80    7.10
 -15  -1   0   30.80    8.00
  15  -1   0   20.00    8.80
 -15   1   0   19.30    7.70
  15   1   0   26.00    8.40
   0  -2   0 7351.46  464.85
  -1  -2   0 3096.59  214.78
   1  -2   0 3484.25  215.28
   1  -2   0 3410.06  214.88
  -1  -2   0 3269.97  214.88
   1  -2   0 3604.94  215.28
   1   2   0 3692.93  215.28
   1   2   0 3602.44  214.98
  -1   2   0 3274.77  215.58
  -1   2   0 3137.69  214.98
   2  -2   0  508.95   33.60
   2  -2   0  521.25   32.60
  -2  -2   0  499.15   32.30
  -2  -2   0  470.15   32.00
  -2  -2   0  509.25   32.40
  -2   2   0  549.25   32.90
  -2   2   0  441.76   32.50
  -2   2   0  502.65   32.90
   2   2   0  529.85   32.30
   2   2   0  508.25   32.10
   2   2   0  499.95   32.20
  -3  -2   0  334.07   22.10
  -3  -2   0  337.77   22.50
  -3  -2   0  360.36   22.20
   3  -2   0  357.86   23.30
  -3  -2   0  316.57   22.00
   3  -2   0  314.27   22.70
  -3  -2   0  352.46   22.30
   3  -2   0  385.86   23.30
   3   2   0  349.67   22.20
  -3   2   0  352.56   23.10
   3   2   0  355.46   22.20
   3   2   0  332.27   22.10
  -3   2   0  348.77   23.00
   3   2   0  339.47   22.70
  -3   2   0  326.87   22.60
   4  -2   0 1301.97   84.89
  -4  -2   0 1356.96   84.39
  -4  -2   0 1321.47   84.79
  -4  -2   0 1293.67   84.49
  -4  -2   0 1270.47   84.39
   4  -2   0 1370.26   85.09
   4  -2   0 1331.97   85.29
   4   2   0 1361.76   84.99
  -4   2   0 1316.37   84.89
   4   2   0 1343.07   84.69
   4   2   0 1351.76   84.49
  -4   2   0 1261.67   85.09
   4   2   0 1352.56   84.49
   4   2   0 1407.46   84.59
  -5  -2   0   68.59    5.00
  -5  -2   0   54.39    5.60
   5  -2   0   65.49    7.50
  -5  -2   0   53.69    4.80
   5  -2   0   48.50    5.40
  -5  -2   0   47.60    4.90
   5   2   0   48.00    5.30
   5   2   0   65.39    4.80
   5   2   0   71.39    5.40
   5   2   0   44.70    6.40
  -5   2   0   50.89    5.30
   5   2   0   60.69    5.40
  -5   2   0   74.09    7.10
  -6  -2   0 1656.83   97.69
  -6  -2   0 1554.74   97.79
  -6  -2   0 1539.55   97.99
  -6  -2   0 1561.64   97.69
   6  -2   0 1423.26   98.69
   6  -2   0 1465.25   98.39
   6  -2   0 1493.75   97.89
   6  -2   0 1491.85   97.99
   6  -2   0 1768.12   98.79
  -6   2   0 1562.64   97.69
   6   2   0 1530.55   97.89
   6   2   0 1515.95   98.29
   6   2   0 1627.04   97.89
  -6   2   0 1299.27   98.39
   6   2   0 1577.54   97.69
   6   2   0 1579.94   97.89
  -6   2   0 1502.05   97.99
  -7  -2   0   -3.00    2.50
   7  -2   0   10.30    6.90
   7  -2   0    1.50    4.80
  -7  -2   0    0.80    2.50
   7  -2   0    5.30    4.90
   7  -2   0   -2.40    3.70
  -7  -2   0    1.00    2.30
  -7  -2   0   -0.30    2.10
   7   2   0    2.60    2.20
   7   2   0    0.90    2.60
   7   2   0    4.20    3.70
  -7   2   0    1.30    3.00
   7   2   0    1.70    3.00
  -7   2   0    0.70    3.00
  -7   2   0   -0.80    4.50
   7   2   0   -2.10    3.20
  -8  -2   0  164.18   13.20
  -8  -2   0  175.08   12.70
   8  -2   0  154.18   13.90
  -8  -2   0  180.68   12.60
   8  -2   0  167.28   16.80
   8  -2   0  215.38   15.30
  -8  -2   0  178.58   13.00
   8  -2   0  192.78   14.70
   8   2   0  201.98   13.70
  -8   2   0  169.68   13.10
   8   2   0  182.98   13.30
  -8   2   0  160.78   13.00
  -8   2   0  193.78   14.90
   8   2   0  166.48   14.40
   8   2   0  180.28   12.50
   8   2   0  170.18   13.40
  -9  -2   0  159.58   11.40
  -9  -2   0  157.68   11.50
   9  -2   0  138.69   14.90
  -9  -2   0  150.08   12.10
   9  -2   0  190.18   15.30
   9  -2   0  145.69   13.90
  -9   2   0  150.38   12.20
   9   2   0  165.38   13.30
  -9   2   0  153.08   11.90
   9   2   0  152.98   11.50
   9   2   0  138.59   12.40
  -9   2   0  159.08   15.60
 -10  -2   0   41.30    6.00
 -10  -2   0   35.70    5.00
  10  -2   0   35.00    8.50
 -10  -2   0   27.50    5.60
  10  -2   0   40.40    9.80
  10   2   0   37.20    5.30
  10   2   0   37.20    5.90
  11  -2   0   78.49   12.90
 -11  -2   0   92.29    8.90
 -11  -2   0  116.79    9.30
  11  -2   0   63.19   12.60
 -11  -2   0   93.69   10.70
  11  -2   0  102.39   14.50
  11   2   0  103.79    9.30
 -11   2   0   92.49   10.50
  11   2   0  104.19   10.70
 -11   2   0   99.49   16.20
 -12  -2   0    9.30    4.60
 -12  -2   0    5.00    5.30
 -12  -2   0    3.60    4.00
  12  -2   0    6.40    8.20
  12  -2   0   10.40   13.10
  12   2   0    1.40    4.40
  12   2   0    5.00    5.80
 -12   2   0    9.20    5.30
 -12   2   0   11.90    5.40
 -13  -2   0   -3.60    4.50
 -13  -2   0    3.40    5.70
  13  -2   0   -0.70    8.10
 -13   2   0    4.00    6.00
  13   2   0    1.60    6.30
  13   2   0    4.30    5.10
 -14  -2   0   27.70    6.00
 -14  -2   0   26.10    7.00
  14  -2   0   36.30   10.90
 -14  -2   0   19.30    7.50
 -14   2   0   18.60    6.80
  14   2   0   35.60    6.70
  14   2   0   21.50    7.70
 -15  -2   0   66.89   10.50
 -15  -2   0   48.40   10.10
  15  -2   0   50.59   12.00
 -15  -2   0   86.99   12.30
 -15   2   0   63.99   10.00
  15   2   0   89.49   15.30
   0  -3   0    0.90    1.90
   0  -3   0    5.40    4.20
   0   3   0   14.00    4.10
   1  -3   0  603.04   38.70
  -1  -3   0  527.75   37.70
   1  -3   0  605.84   37.80
  -1  -3   0  548.95   37.60
  -1   3   0  619.64   38.70
   1   3   0  625.84   38.60
   1   3   0  575.04   37.70
   1   3   0  595.64   37.90
  -1   3   0  582.54   37.70
  -2  -3   0   65.09    5.10
   2  -3   0   66.89    5.90
  -2  -3   0   58.09    5.80
   2  -3   0   59.99    7.70
   2  -3   0   72.39    7.40
  -2   3   0   59.99    7.30
   2   3   0   68.19    6.30
   2   3   0   67.29    5.40
   3  -3   0  249.08   19.40
  -3  -3   0  252.67   17.80
   3  -3   0  305.57   19.80
  -3  -3   0  247.78   18.00
  -3  -3   0  288.37   17.70
  -3  -3   0  284.17   18.30
   3  -3   0  258.37   18.20
  -3   3   0  244.78   18.90
   3   3   0  275.67   18.00
   3   3   0  298.67   18.70
   3   3   0  292.07   17.70
  -4  -3   0 1791.72  113.09
   4  -3   0 1847.92  113.69
  -4  -3   0 1741.03  113.19
  -4  -3   0 1712.93  112.89
   4  -3   0 1888.41  113.39
  -4  -3   0 1778.82  113.39
   4  -3   0 1795.42  114.19
   4  -3   0 1863.91  114.09
  -4  -3   0 1664.13  112.89
  -4   3   0 1852.01  113.99
   4   3   0 1824.52  113.69
   4   3   0 1757.22  112.99
   4   3   0 1806.52  113.19
  -4   3   0 1645.84  113.89
   4   3   0 1763.32  112.99
   5  -3   0  290.27   20.80
  -5  -3   0  268.07   18.60
   5  -3   0  271.37   20.70
  -5  -3   0  285.97   19.10
  -5  -3   0  283.27   18.40
  -5  -3   0  284.87   18.50
   5  -3   0  288.87   20.10
   5   3   0  285.37   18.70
   5   3   0  283.37   19.60
  -5   3   0  281.87   19.40
   5   3   0  291.17   18.80
  -5   3   0  246.68   20.50
   5   3   0  296.37   18.70
   6  -3   0  121.29   13.10
  -6  -3   0  107.29    9.20
  -6  -3   0  133.49    9.90
   6  -3   0  114.39   13.30
  -6  -3   0  149.29    9.30
   6  -3   0  128.69   13.50
  -6  -3   0  143.59    9.30
   6   3   0  129.99    9.70
  -6   3   0  133.19   11.30
   6   3   0  119.69    9.30
   6   3   0  135.39    9.70
   6   3   0  120.69   10.80
  -6   3   0  103.99   12.50
  -7  -3   0    4.00    2.40
   7  -3   0    4.00    6.30
  -7  -3   0    2.40    2.50
  -7  -3   0    4.60    2.60
  -7  -3   0    8.30    3.30
   7  -3   0    2.80    8.60
   7   3   0    5.80    3.60
   7   3   0    5.90    4.60
  -7   3   0    9.80    6.00
   7   3   0    7.60    3.90
   7   3   0   11.30    3.90
   7   3   0    4.20    2.80
  -7   3   0    7.80    6.00
  -8  -3   0   61.59    5.80
  -8  -3   0   57.39    6.70
   8  -3   0   50.19    7.40
  -8  -3   0   52.59    5.70
   8   3   0   48.80    6.00
   8   3   0   39.20    7.70
  -8   3   0   64.49    7.70
   9  -3   0  114.39   13.40
  -9  -3   0  110.69   10.20
  -9  -3   0  115.89    9.00
  -9  -3   0  105.09    8.80
  -9   3   0   97.99   10.40
  -9   3   0  112.79    9.60
  -9   3   0  105.99   15.00
   9   3   0   99.79    9.20
   9   3   0   92.89   10.80
  10  -3   0   12.00    8.80
 -10  -3   0   30.20    7.10
  10  -3   0   23.20    9.00
 -10  -3   0   25.20    4.30
 -10  -3   0   21.10    4.60
  10   3   0   27.60    4.90
 -10   3   0   29.90    5.50
 -11  -3   0   16.70    5.30
  11  -3   0   24.90   10.10
  11  -3   0   10.00   11.10
 -11  -3   0   12.70    4.00
 -11  -3   0   19.10    5.80
 -11   3   0   33.30    6.30
  11   3   0   21.90    4.90
  11   3   0   20.70    6.00
 -11   3   0   38.40   13.30
  12  -3   0   -2.40   10.80
 -12  -3   0   -0.60    6.00
 -12  -3   0   -1.20    4.10
 -12  -3   0   -1.50    4.50
  12   3   0    1.00    6.20
  12   3   0    1.90    4.60
 -12   3   0   -3.30    5.70
 -13  -3   0   43.90    8.80
  13  -3   0   32.10   12.30
 -13  -3   0   44.70    6.40
 -13  -3   0   41.60    6.80
 -13   3   0   37.60    7.60
  13   3   0   54.59    7.30
  13   3   0   59.99    8.60
 -13   3   0   60.89   13.20
 -14  -3   0   20.40    6.20
 -14  -3   0   17.90    8.00
  14  -3   0   13.20   13.40
 -14  -3   0   26.00    6.80
  14   3   0   23.70    8.20
  14   3   0   25.60    6.70
   0  -4   0   -2.90    5.20
   0   4   0   -4.90    2.40
   0   4   0   -4.60    5.40
   1  -4   0  600.94   39.00
   1  -4   0  622.04   40.20
  -1  -4   0  556.34   38.80
  -1  -4   0  524.35   38.90
  -1  -4   0  636.54   40.00
   1   4   0  589.64   39.30
   1   4   0  584.74   39.00
  -1   4   0  610.84   39.00
  -1   4   0  665.43   40.40
   1   4   0  633.14   40.20
   2  -4   0   58.59    9.10
   2  -4   0   68.69    8.70
  -2  -4   0   80.69    7.10
  -2   4   0   56.39    9.30
   2   4   0   82.69    7.60
   3  -4   0  347.77   22.70
  -3  -4   0  266.77   20.00
   3  -4   0  370.26   20.80
  -3  -4   0  286.17   20.60
   3   4   0  274.47   21.10
   3   4   0  290.37   20.40
   4  -4   0   38.90    5.10
  -4  -4   0   27.10    3.80
   4  -4   0   19.90    7.60
   4  -4   0   25.20    7.10
  -5  -4   0  145.59   12.10
  -5  -4   0  179.08   11.20
  -5  -4   0  154.18   11.20
  -5  -4   0  132.59   11.20
  -5  -4   0  168.08   11.00
   5   4   0  181.08   11.90
   5   4   0  167.58   11.30
   5   4   0  141.29   11.20
   5   4   0  160.88   11.50
   6  -4   0   58.19    9.80
   6  -4   0   48.30    7.90
  -6  -4   0   49.70    5.70
  -6   4   0   63.09   10.70
  -6   4   0   72.39   10.60
  -7  -4   0   34.50    5.20
  -7  -4   0   39.00    5.00
  -7  -4   0   36.50    4.70
   7   4   0   34.70    5.10
  -8  -4   0  334.27   21.90
  -8  -4   0  348.77   22.10
  -8  -4   0  296.67   22.60
   8  -4   0  325.77   27.20
   8   4   0  322.37   22.50
  -8   4   0  333.27   25.80
  -9  -4   0   96.89    9.00
  -9  -4   0  118.39    9.00
  -9  -4   0   84.19    9.90
  10  -4   0  152.88   22.60
 -10  -4   0  163.08   12.60
 -10  -4   0  158.38   14.10
 -10  -4   0  180.68   13.00
 -10   4   0  183.88   21.00
  10   4   0  171.68   13.20
 -10   4   0  151.38   14.30
 -11  -4   0   -1.20    4.00
 -11  -4   0    1.70    5.80
 -11  -4   0   -3.10    3.90
  11  -4   0    2.50   12.00
 -11   4   0   -0.80   10.30
  11   4   0    5.10    4.60
 -12  -4   0   52.89    9.00
  12  -4   0   42.60   15.40
 -12  -4   0   70.49    8.60
 -12  -4   0   54.69    8.40
 -12   4   0   81.39   18.30
  12   4   0   64.99    9.00
 -13  -4   0   16.80    8.00
  13  -4   0    7.60   13.90
 -13  -4   0   12.10    5.60
 -13  -4   0    7.50    5.20
 -13   4   0   18.60   16.30
  13   4   0   11.80    5.70
  14  -4   0   -2.80   18.20
 -14  -4   0   -3.90    5.90
 -14  -4   0  -10.70    5.80
 -14  -4   0   -0.60    8.30
  14   4   0   -5.00    6.30
   0  -5   0   12.50    7.10
   0  -5   0    9.30    3.30
   0   5   0    5.60    3.70
   0   5   0    3.60    7.00
  -1  -5   0   42.20    5.40
   1  -5   0   57.19    6.30
  -1  -5   0   34.10    4.80
   1  -5   0   46.70    9.10
   1   5   0   42.30    5.40
   1   5   0   31.70    5.50
   1   5   0   53.49    9.30
   2  -5   0  192.08   19.20
   2  -5   0  175.68   14.80
   2  -5   0  174.78   17.20
  -2  -5   0  175.78   13.20
   2   5   0  167.58   13.10
   2   5   0  170.28   14.10
  -2   5   0  186.58   16.40
  -3  -5   0  342.37   22.60
   3  -5   0  306.37   24.70
   3  -5   0  331.67   26.60
   3   5   0  361.46   22.70
  -3   5   0  320.97   25.00
   3   5   0  314.57   23.40
   5  -5   0   25.50   10.10
   5   5   0   23.90    4.50
  -5   5   0   11.10    9.00
  -6  -5   0  236.88   17.30
  -6  -5   0  233.98   16.20
   6   5   0  230.78   17.10
   7  -5   0   14.80   11.20
  -7  -5   0    9.30    3.50
   7   5   0    0.90    4.70
   7   5   0    2.70    3.40
   8  -5   0    2.50   12.50
  -8  -5   0   30.60    5.90
  -8  -5   0   45.00    5.90
   8   5   0   28.90    5.60
  -9  -5   0   49.90    6.40
   9  -5   0   15.70   13.30
  -9  -5   0   54.49    7.90
   9   5   0   35.30    6.20
 -10  -5   0  128.19   12.80
 -10  -5   0  104.79   11.40
 -10  -5   0  118.49   10.30
  10  -5   0  102.09   18.70
  10   5   0  121.59   11.80
 -10   5   0  131.59   18.20
  11  -5   0  -17.60   17.70
 -11  -5   0    0.80    6.00
 -11  -5   0    4.20    4.60
 -11  -5   0    1.70    5.20
  11   5   0   13.00    5.90
 -11   5   0    9.80   14.90
 -12  -5   0    2.40    7.00
  12  -5   0   -1.00   17.00
 -12  -5   0    3.70    5.00
 -12  -5   0    7.60    5.90
  12   5   0    3.60    6.20
 -13  -5   0   16.90    7.00
  13  -5   0  -20.00   20.00
 -13  -5   0    9.40    6.40
 -13  -5   0    4.50    8.50
  13   5   0   22.30    7.40
   0   6   0   41.40   10.90
  -1  -6   0  112.89   10.60
   1   6   0  126.39   15.60
  -1   6   0  106.29   15.90
   1   6   0  139.99   11.30
   2  -6   0   67.29   14.00
  -2  -6   0   48.80    8.40
   2   6   0   75.49    8.20
   2   6   0   73.69   12.00
  -2   6   0   60.69   11.80
  -3  -6   0   89.79    9.90
   3  -6   0  102.69   14.80
  -3   6   0  102.59   14.40
   3   6   0  105.89   14.40
   3   6   0   87.69    9.50
  -4  -6   0    1.20    4.60
   4  -6   0    8.50   11.50
   5  -6   0  330.87   30.20
  -5  -6   0  332.17   22.60
   5   6   0  313.87   22.00
  -5   6   0  258.17   26.80
   6  -6   0   40.50   13.90
  -6  -6   0   13.10    5.10
  -6   6   0   28.60   12.90
   6   6   0   22.90    5.50
  -6   6   0   11.40   11.00
  -7  -6   0   27.80    5.00
  -7  -6   0   19.50    5.60
   7  -6   0   14.60   14.70
   7   6   0   19.20    5.50
  -7   6   0   26.10   10.80
  -8  -6   0   12.60    5.70
   8  -6   0  -20.00   14.90
  -8  -6   0   12.10    4.80
  -8   6   0   15.30   12.80
   8   6   0    9.50    5.60
  -9  -6   0   -1.20    5.70
  -9  -6   0    0.80    4.90
  -9  -6   0   -1.80    5.60
   9  -6   0   -9.80   16.50
   9   6   0    2.70    5.50
  10  -6   0  -18.00   20.20
 -10  -6   0   -2.20    5.90
 -10  -6   0    0.80    6.20
 -10  -6   0   -1.00    5.40
  10   6   0   10.30    6.40
 -11  -6   0   -6.50    6.20
 -11  -6   0    5.00    6.90
  11  -6   0   -0.50   20.90
 -11  -6   0    7.00    5.90
  11   6   0    3.30    6.60
 -11   6   0   -1.30   16.20
   0   7   0   26.90   13.00
   0   7   0   33.80    7.80
   1   7   0   40.70   13.00
  -1   7   0   39.80   13.70
   2  -7   0  181.18   29.00
   2   7   0  147.59   19.10
   2   7   0  153.58   13.90
  -2   7   0  152.68   21.30
   3  -7   0   65.09   15.20
  -3  -7   0   26.10    6.00
   3   7   0   26.30    6.40
  -3   7   0   39.60   14.30
   3   7   0   38.60   13.10
  -4  -7   0   94.99   10.40
   4  -7   0   44.70   22.00
   4   7   0   75.39   10.30
  -4   7   0   88.19   17.00
   5  -7   0   16.70   16.50
  -5  -7   0    0.00    5.50
  -5   7   0    2.90   15.50
   5   7   0    3.30    5.80
   6  -7   0   52.39   20.40
  -6  -7   0   21.10    6.50
   6   7   0   12.50    6.60
  -6   7   0   50.49   18.40
  -7  -7   0   11.20    6.40
   7  -7   0   34.00   18.60
   7   7   0   24.50    6.60
  -8  -7   0   -8.40    6.20
   8  -7   0    7.90   20.80
   8   7   0    4.70    6.10
  -9  -7   0   12.70    7.40
   9  -7   0   -7.60   21.10
  -9  -7   0   23.70    6.50
   9   7   0   23.90    7.50
 -10  -7   0   -5.10    8.00
  10  -7   0  -42.30   22.90
  10   7   0    2.40    7.50
   0  -8   0  113.59   21.50
   0   8   0  122.29   23.90
   1  -8   0   85.29   22.50
   1   8   0  114.99   15.10
  -1   8   0   60.49   21.70
   1   8   0   89.59   19.60
   2  -8   0  109.79   22.80
   2   8   0  117.59   22.00
  -2   8   0  105.29   19.70
   2   8   0  123.99   15.70
  -3  -8   0   -2.70    6.60
   3  -8   0   19.00   18.70
  -3   8   0    7.70   16.60
   3   8   0   23.10    8.40
  -4  -8   0    0.40    7.20
   4  -8   0  -11.20   19.70
   4   8   0   18.70    7.40
  -4   8   0    9.70   18.90
   5  -8   0   18.40   22.00
  -5  -8   0    9.80    7.20
   5   8   0    8.90    7.30
  -5   8   0    0.90   20.80
  -6  -8   0   -5.90    7.20
   6  -8   0   -7.80   22.50
   6   8   0   -9.00    6.90
  -7  -8   0    9.30    7.70
   7   8   0   15.10    7.80
   0  -9   0  -27.00   26.80
   0   9   0  -28.20   22.60
  -1  -9   0   17.20   22.50
   1  -9   0   34.70   24.00
  -1   9   0    9.00   21.60
   1   9   0   -2.50   24.30
   2  -9   0   34.50   28.30
  -2   9   0    2.60   27.80
   2   9   0   -3.20   23.40
  15   0  -1   12.50    8.00
 -15   0   1   19.80    6.80
  14   0  -1    7.10    6.80
 -14   0   1   14.90    5.90
 -14   0   1   11.90    6.90
  13   0  -1    2.00    6.10
 -13   0   1    0.80    5.00
 -13   0   1   -0.80    6.00
 -12   0   1    0.50    5.20
  12   0  -1   22.50    9.90
  12   0  -1    5.60    5.30
 -12   0   1    6.00    4.50
 -12   0   1    7.00    4.70
  11   0  -1   10.00    5.60
 -11   0   1    0.90    4.80
  11   0  -1   -3.30    8.90
 -11   0   1    0.90    4.40
  -9   0   1    8.00    3.50
  -9   0   1    7.80    3.40
   9   0  -1   -0.60    4.80
   9   0  -1   11.80    4.40
   9   0  -1    4.10    5.60
   8   0  -1    0.20    3.40
  -8   0   1   -2.30    2.80
   8   0  -1   -0.90    3.40
  -8   0   1   -0.60    3.60
   8   0  -1    4.10    4.30
  -8   0   1   -0.20    2.70
   8   0  -1    1.30    4.00
   7   0  -1   -0.60    3.40
   7   0  -1    2.70    2.80
   7   0  -1    2.40    3.60
  -7   0   1    1.20    2.40
  -7   0   1   -3.20    2.30
   7   0  -1   -2.40    2.80
  -7   0   1    0.20    3.00
   6   0  -1   -1.20    2.40
   6   0  -1   -2.20    2.80
   6   0  -1    1.20    3.00
  -6   0   1    4.70    2.70
  -6   0   1   -3.20    2.10
   6   0  -1    2.80    2.50
  -3   0   1   -0.30    1.40
  -2   0   1   -0.80    1.00
  -2   0   1    0.20    0.80
   2   0  -1   -0.80    1.10
   2   0  -1    0.00    1.10
   2   0  -1   -1.10    0.90
  -2   0   1   -0.60    1.10
  -2   0   1    1.40    1.10
   2   0  -1    0.30    1.00
   2   0   1   -0.60    0.80
  -2   0  -1    0.10    0.70
   2   0   1   -0.10    0.70
  -2   0  -1    2.00    1.00
  -2   0  -1   -1.20    0.60
  -2   0  -1    0.40    0.70
   2   0   1   -0.50    0.70
   3   0   1   -2.40    1.20
   3   0   1   -2.40    1.10
  -3   0  -1    1.70    1.30
  -3   0  -1   -1.90    0.90
  -3   0  -1   -1.20    1.10
   3   0   1    0.00    1.20
   4   0   1   -0.70    1.70
  -4   0  -1    1.50    1.80
  -4   0  -1    0.50    1.40
  -4   0  -1   -2.70    1.20
   4   0   1   -2.30    1.60
   4   0   1   -1.00    1.80
  -4   0  -1   -2.50    1.50
   4   0   1   -1.00    1.70
   5   0   1    4.70    2.10
  -5   0  -1    1.10    1.50
  -5   0  -1    1.00    2.30
  -6   0  -1    3.40    1.80
  -6   0  -1    1.30    2.50
  -6   0  -1   -1.70    1.90
   6   0   1    5.70    2.40
   6   0   1   -3.00    2.40
   6   0   1   -1.30    2.60
  -6   0  -1   -4.60    1.90
   6   0   1   -1.40    2.50
  -7   0  -1   -6.10    3.10
   7   0   1    2.10    2.90
   7   0   1   -1.90    3.20
  -7   0  -1   -3.10    1.90
   7   0   1    0.50    2.70
  -7   0  -1    1.90    2.10
  -7   0  -1   -1.20    2.10
   7   0   1    5.90    3.00
  -8   0  -1   -3.20    2.50
   8   0   1   -2.50    3.90
   8   0   1    0.40    3.10
  -8   0  -1   -4.70    2.50
  -8   0  -1    4.00    2.50
   8   0   1    0.10    3.80
   8   0   1    7.40    3.60
  -8   0  -1    2.00    3.80
  -9   0  -1   -3.50    3.00
   9   0   1   -8.90    4.70
  -9   0  -1   -0.50    2.90
   9   0   1   -0.90    4.50
   9   0   1   -3.40    3.60
   9   0   1   -0.30    4.40
  -9   0  -1   -0.50    2.90
 -10   0  -1    3.50    3.40
  10   0   1    8.30    5.80
  10   0   1    2.00    4.40
  10   0   1  -12.50    6.20
  10   0   1    0.50    5.90
 -10   0  -1    2.10    3.60
  11   0   1   -1.30    9.10
 -11   0  -1    6.90    4.80
 -11   0  -1    5.30    4.20
 -12   0  -1    4.60    4.30
  12   0   1   17.30   13.90
 -12   0  -1    6.10    4.20
 -12   0  -1    1.00    4.70
  12   0   1    4.20    5.50
 -13   0  -1    5.10    5.70
  13   0   1   15.20    6.30
 -13   0  -1   -0.60    5.50
 -13   0  -1    8.50    4.80
 -14   0  -1   14.40    6.70
 -14   0  -1   16.90    5.90
 -14   0  -1   17.80    7.20
  15   0   1   -4.00    7.70
 -15   0  -1    7.50    6.40
 -15  -1   1   20.00    6.60
  15  -1  -1    4.90    8.40
 -15  -1   1   11.00    7.30
 -15  -1   1    6.10    7.40
 -15   1   1    8.00    7.10
  15   1  -1   26.90    8.10
 -14  -1   1    5.90    6.30
 -14  -1   1   -8.30    5.90
  14  -1  -1    5.50    7.80
 -14  -1   1   13.30    5.90
 -14   1   1   19.10    6.50
  14   1  -1   12.40    7.10
 -13  -1   1   55.79    8.50
 -13  -1   1   45.40    8.20
 -13  -1   1   64.99    9.50
  13  -1  -1   62.29    9.80
 -13   1   1   49.70    8.30
  13   1  -1   66.59    8.60
  12  -1  -1   18.30    9.60
 -12  -1   1   15.90    4.60
  12  -1  -1    5.90    6.60
 -12  -1   1    8.80    5.00
 -12  -1   1   11.00    5.00
 -12   1   1    7.00    9.80
 -12   1   1    1.60    5.50
  12   1  -1    7.60    5.60
 -12   1   1    9.90    5.30
 -11  -1   1   43.20    6.90
  11  -1  -1   22.10    9.90
 -11  -1   1   28.60    5.30
  11  -1  -1   36.10    8.50
 -11  -1   1   37.60    5.90
  11   1  -1   39.30    9.70
 -11   1   1   61.79   11.20
 -11   1   1   26.10    5.80
  11   1  -1   42.40    8.70
 -11   1   1   34.10    6.30
 -10  -1   1   11.60    4.10
  10  -1  -1   11.80    5.80
  10  -1  -1   18.00    6.40
 -10  -1   1    8.90    4.10
 -10  -1   1   10.10    3.80
  10  -1  -1   10.90    6.50
 -10   1   1   10.10    4.40
 -10   1   1   14.40    4.40
  10   1  -1   14.90    6.80
  10   1  -1    7.50    6.90
  -9  -1   1  601.84   38.60
   9  -1  -1  564.44   39.20
   9  -1  -1  540.95   39.30
  -9  -1   1  625.34   38.40
   9  -1  -1  527.35   39.40
  -9  -1   1  655.73   38.60
   9   1  -1  655.93   39.50
   9   1  -1  603.84   39.30
   9   1  -1  607.04   39.20
  -9   1   1  534.15   38.60
   9   1  -1  589.24   38.70
  -9   1   1  581.74   38.50
  -8  -1   1   11.60    2.90
   8  -1  -1   15.40    4.60
   8  -1  -1   19.20    4.60
   8  -1  -1   13.60    4.80
  -8  -1   1   15.70    4.00
  -8  -1   1   13.50    3.00
  -8  -1   1   16.40    3.10
   8   1  -1   13.70    4.40
  -8   1   1   20.40    4.10
  -8   1   1   13.50    3.60
   8   1  -1   17.90    3.40
   8   1  -1   11.40    4.20
  -8   1   1   20.60    5.10
   8   1  -1   12.50    4.00
  -7  -1   1 1570.54   95.39
   7  -1  -1 1501.75   95.69
   7  -1  -1 1510.35   95.69
  -7  -1   1 1495.65   95.59
   7  -1  -1 1454.55   95.79
  -7  -1   1 1509.75   95.39
  -7  -1   1 1474.45   95.49
  -7   1   1 1514.75   95.49
  -7   1   1 1310.57   95.79
   7   1  -1 1571.44   95.39
   7   1  -1 1561.54   95.69
   7   1  -1 1504.35   95.59
   7   1  -1 1487.15   95.79
  -7   1   1 1526.25   95.39
  -6  -1   1   29.60    3.60
   6  -1  -1   38.10    6.10
   6  -1  -1   24.60    4.00
  -6  -1   1   28.20    4.30
   6  -1  -1   30.90    5.60
  -6  -1   1   26.70    3.70
  -6  -1   1   22.00    3.20
   6  -1  -1   26.40    3.90
   6   1  -1   27.70    4.00
   6   1  -1   34.90    4.80
  -6   1   1   30.10    4.40
   6   1  -1   30.80    4.60
   6   1  -1   30.20    4.00
  -6   1   1   27.90    4.40
  -6   1   1   35.80    6.50
   5  -1  -1  300.77   19.60
   5  -1  -1  282.67   19.30
  -5  -1   1  272.77   19.20
  -5  -1   1  293.67   19.00
  -5  -1   1  306.47   19.20
   5  -1  -1  293.67   19.40
  -5  -1   1  293.27   19.00
  -5   1   1  292.07   19.20
   5   1  -1  300.27   19.30
   5   1  -1  288.47   19.50
   5   1  -1  289.67   19.20
  -5   1   1  285.97   19.80
   5   1  -1  284.17   19.00
  -4  -1   1  560.64   40.00
  -4  -1   1  628.14   40.20
   4  -1  -1  663.83   40.20
  -4  -1   1  546.45   40.20
   4  -1  -1  671.83   40.30
  -4  -1   1  644.14   40.00
  -4   1   1  575.44   40.30
   4   1  -1  582.34   40.00
  -4   1   1  686.23   40.20
  -4   1   1  693.73   40.20
   4   1  -1  636.84   40.40
   4   1  -1  701.63   40.20
   4   1  -1  563.24   40.20
  -3  -1   1 1943.11  127.59
   3  -1  -1 2010.00  127.59
  -3  -1   1 1949.20  127.39
  -3  -1   1 2035.20  127.49
   3  -1  -1 2245.08  127.79
   3  -1  -1 1991.10  127.49
  -3  -1   1 1957.70  127.49
   3   1  -1 2068.09  127.49
  -3   1   1 1956.20  127.49
  -3   1   1 2016.70  127.69
  -3   1   1 1970.30  127.79
   3   1  -1 2022.50  127.69
   3   1  -1 1999.70  127.49
   3   1  -1 2033.20  127.49
  -2  -1   1   23.00    2.20
   2  -1  -1   25.20    3.30
  -2  -1   1   23.30    2.20
  -2  -1   1   19.50    2.10
  -2  -1   1   25.10    2.60
   2  -1  -1   24.30    2.70
  -2   1   1   23.00    3.00
   2   1  -1   25.10    2.30
   2   1  -1   25.80    2.70
   2   1  -1   22.80    2.30
   1  -1  -1 5697.23  359.56
  -1   1   1 5679.23  359.56
   0  -1  -1 4635.84  293.07
   1  -1   1  742.63   53.09
   1  -1   1  799.42   53.29
  -1  -1  -1  910.71   53.09
   1  -1   1  943.31   53.09
   1  -1   1  939.81   53.29
  -1  -1  -1  779.62   52.99
  -1  -1  -1  801.82   52.99
  -1  -1  -1  825.72   53.09
   1   1   1  802.52   52.99
  -1   1  -1  878.71   53.29
   1   1   1  815.62   52.99
   1   1   1  857.01   53.09
  -1   1  -1  846.62   53.29
  -1   1  -1  741.13   53.09
   1   1   1  898.31   53.09
   1   1   1  822.22   53.19
   2  -1   1   38.80    4.00
  -2  -1  -1   34.20    2.70
  -2  -1  -1   34.90    2.50
   2  -1   1   22.80    3.50
  -2  -1  -1   26.00    2.40
   2  -1   1   34.80    3.70
  -2  -1  -1   31.00    2.70
   2   1   1   25.90    2.50
   2   1   1   31.90    3.00
  -2   1  -1   39.00    3.80
   2   1   1   34.70    2.90
   2   1   1   27.00    2.50
  -3  -1  -1   72.69    5.00
   3  -1   1   62.99    5.00
   3  -1   1   62.89    5.20
  -3  -1  -1   62.09    5.40
  -3  -1  -1   64.39    4.80
  -3   1  -1   61.89    4.90
   3   1   1   63.79    5.40
   3   1   1   79.49    4.80
   3   1   1   71.19    4.90
   3   1   1   75.39    4.90
  -3   1  -1   55.79    5.60
  -3   1  -1   83.59    6.00
  -4  -1  -1 1994.40  128.09
   4  -1   1 2053.79  127.99
   4  -1   1 2102.89  128.19
  -4  -1  -1 2077.49  127.89
   4  -1   1 1954.40  127.99
  -4  -1  -1 2041.00  127.99
   4   1   1 2096.49  127.99
  -4   1  -1 1899.11  127.89
   4   1   1 2044.80  127.99
   4   1   1 2071.99  127.99
  -4   1  -1 1905.11  128.19
   4   1   1 2004.40  128.19
  -5  -1  -1   22.30    2.70
  -5  -1  -1   17.70    3.00
  -5  -1  -1   28.30    3.60
   5  -1   1   27.30    4.20
   5  -1   1   25.90    3.40
   5  -1   1   25.40    3.40
  -5  -1  -1   22.20    3.30
  -5   1  -1   22.70    3.00
   5   1   1   25.20    3.10
  -5   1  -1   28.40    5.40
   5   1   1   27.00    3.40
   5   1   1   24.50    3.40
   5   1   1   27.80    3.10
  -6  -1  -1    3.50    2.00
  -6  -1  -1   -1.60    2.00
  -6  -1  -1    6.70    2.40
   6  -1   1    0.10    2.90
   6  -1   1   -4.50    3.10
  -6  -1  -1   -2.20    1.90
   6  -1   1    4.90    2.70
   6   1   1    6.50    2.20
  -6   1  -1    3.80    3.50
   6   1   1    0.70    2.40
  -6   1  -1   -2.80    2.20
   6   1   1    8.50    2.90
   6   1   1    3.50    2.60
  -7  -1  -1  928.71   58.39
  -7  -1  -1  928.71   58.59
   7  -1   1  896.81   58.69
  -7  -1  -1  970.20   58.39
   7  -1   1  885.01   58.89
   7  -1   1  889.41   58.89
  -7  -1  -1  910.71   58.79
  -7   1  -1  917.41   58.39
   7   1   1  930.71   58.69
   7   1   1  871.51   58.89
  -7   1  -1  788.52   59.09
   7   1   1  967.80   58.79
   7   1   1  969.80   58.69
  -7   1  -1  946.11   58.49
  -8  -1  -1    1.80    3.50
   8  -1   1    8.40    4.10
  -8  -1  -1    5.30    2.70
   8  -1   1    4.80    4.00
  -8  -1  -1   -1.50    2.80
  -8  -1  -1    3.80    2.40
   8  -1   1   11.10    4.40
  -8   1  -1    4.90    4.50
  -8   1  -1    4.90    2.80
   8   1   1    6.80    3.60
   8   1   1   -4.10    3.90
   8   1   1    5.10    3.10
  -8   1  -1    3.40    2.70
  -8   1  -1    2.50    5.20
   8   1   1    4.70    3.80
  -9  -1  -1   -3.80    3.40
   9  -1   1    2.00    4.40
  -9  -1  -1    8.90    3.30
  -9  -1  -1    3.40    2.80
   9  -1   1   11.70    5.50
   9   1   1   -9.00    5.10
  -9   1  -1    2.30    3.50
   9   1   1   12.90    4.90
   9   1   1    9.30    4.50
   9   1   1    5.40    3.70
  -9   1  -1    5.60    3.40
 -10  -1  -1    0.50    3.30
  10  -1   1   -1.90    5.10
 -10  -1  -1   -5.40    3.90
  10  -1   1   -5.80    7.70
 -10  -1  -1   -0.70    3.50
  10  -1   1   12.00    7.10
 -10   1  -1    1.20    3.80
  10   1   1   -6.80    4.30
  10   1   1   -3.30    5.90
 -10   1  -1    2.60    3.80
 -11  -1  -1  350.76   21.00
 -11  -1  -1  353.96   21.20
 -11  -1  -1  316.07   21.50
  11  -1   1  279.87   24.50
  11  -1   1  260.87   24.70
 -11   1  -1  260.07   21.10
  11   1   1  308.67   23.30
  11   1   1  291.77   24.60
 -11   1  -1  273.07   21.20
 -12  -1  -1  267.47   18.70
 -12  -1  -1  251.47   18.70
  12  -1   1  232.48   20.30
 -12  -1  -1  261.77   18.20
 -12   1  -1  237.38   18.40
 -12   1  -1  286.07   22.80
 -12   1  -1  217.48   18.30
  12   1   1  274.97   19.70
  13  -1   1    1.10    6.70
 -13  -1  -1    5.30    5.50
 -13  -1  -1   -5.10    4.40
 -13  -1  -1    2.10    5.20
 -13   1  -1   12.40    5.90
  13   1   1    4.60    6.20
 -14  -1  -1   -7.50    6.60
 -14  -1  -1    4.80    6.40
  14  -1   1   16.20    7.70
 -14  -1  -1    7.50    5.60
  14   1   1    7.20    7.20
 -14   1  -1    7.10    6.00
 -15  -1  -1    2.10    8.30
 -15  -1  -1   11.70    8.70
 -15  -1  -1   13.70    6.30
  15  -1   1   10.40    8.30
  15   1   1   15.00    8.30
 -15   1  -1   15.00    7.40
  15  -2  -1   25.00   12.50
 -15  -2   1    7.00    7.60
 -15  -2   1   16.90    6.00
 -15   2   1   11.20    8.30
  15   2  -1   18.30    8.10
  15   2  -1   16.20    6.70
 -14  -2   1    3.60    6.10
 -14  -2   1    0.10    5.00
 -14  -2   1    4.00    7.20
  14  -2  -1   -3.20    9.20
 -14   2   1    2.10    6.80
  14   2  -1    9.50    5.90
  14   2  -1   -1.50    7.10
 -13  -2   1    5.70    4.70
 -13  -2   1   11.40    6.50
  13  -2  -1    7.70    8.60
 -13  -2   1   -0.60    6.00
  13   2  -1   -0.60    6.00
 -13   2   1   -2.70   12.30
  13   2  -1   -2.40    5.10
 -13   2   1   -2.50    6.00
 -12  -2   1   85.79   10.40
  12  -2  -1   78.19   11.40
 -12  -2   1   98.19    9.20
 -12  -2   1   83.69    8.80
 -12   2   1   64.19   10.20
 -12   2   1  105.59   16.20
  12   2  -1   85.89    8.90
 -12   2   1   72.29   11.40
  12   2  -1   95.79   10.80
 -11  -2   1   42.90    6.50
  11  -2  -1   36.40   11.80
  11  -2  -1   20.20   11.50
 -11  -2   1   31.80    5.90
 -11  -2   1   45.40    5.90
 -11   2   1   42.00    6.40
  11   2  -1   43.90    7.70
 -11   2   1   72.49   13.50
 -11   2   1   57.19    8.90
 -10  -2   1  850.61   50.59
  10  -2  -1  699.03   52.19
 -10  -2   1  841.72   51.09
 -10  -2   1  854.51   50.59
  10  -2  -1  750.42   51.89
  10   2  -1  815.72   50.99
 -10   2   1  656.13   50.89
 -10   2   1  780.22   53.49
 -10   2   1  763.52   50.89
  -9  -2   1  421.76   24.70
   9  -2  -1  362.36   26.70
  -9  -2   1  406.86   25.10
   9  -2  -1  332.87   26.10
  -9  -2   1  390.16   24.60
   9  -2  -1  337.07   26.70
   9   2  -1  378.16   25.10
   9   2  -1  402.76   25.60
  -9   2   1  341.97   25.00
  -9   2   1  324.47   25.20
  -9   2   1  352.46   27.90
  -8  -2   1  140.39   10.80
  -8  -2   1  118.29   10.10
  -8  -2   1  128.89   10.10
   8  -2  -1  159.88   12.30
   8  -2  -1  168.78   15.10
  -8  -2   1  118.89   10.80
   8  -2  -1  171.78   12.70
   8   2  -1  139.99   10.10
   8   2  -1  120.39   11.20
   8   2  -1  128.19   11.40
   8   2  -1  127.59   12.30
  -8   2   1  146.29   11.30
   8   2  -1  137.79   10.80
   7  -2  -1   95.39    9.60
  -7  -2   1   78.39    6.90
  -7  -2   1   69.39    6.30
   7  -2  -1   62.29    8.30
  -7  -2   1   73.59    7.00
   7  -2  -1   74.39    8.40
  -7  -2   1   76.39    6.30
   7  -2  -1   83.19   10.70
   7   2  -1   70.39    8.20
  -7   2   1   74.69   10.40
   7   2  -1   77.09    6.30
   7   2  -1   69.39    7.10
   7   2  -1   80.49    7.60
  -7   2   1   78.69    7.50
   7   2  -1   68.29    6.90
  -7   2   1   87.49    7.20
  -6  -2   1   20.50    3.20
  -6  -2   1   30.10    4.00
   6  -2  -1   28.20    6.60
  -6  -2   1   19.10    3.10
   6  -2  -1   30.90    5.30
  -6  -2   1   37.80    4.90
   6   2  -1   30.90    4.20
   6   2  -1   39.70    5.80
   6   2  -1   24.60    3.40
  -6   2   1   26.20    5.50
  -6   2   1   33.60    5.40
   6   2  -1   17.90    3.60
   6   2  -1   24.60    3.80
   5  -2  -1   79.09    7.30
   5  -2  -1   99.19    8.60
  -5  -2   1   71.59    6.10
   5  -2  -1   90.59    8.90
  -5  -2   1   72.09    6.00
   5  -2  -1   84.39    7.20
  -5  -2   1   67.29    7.00
  -5  -2   1   91.89    6.20
  -5   2   1   80.49    8.20
  -5   2   1   98.09    8.60
  -5   2   1   81.49    7.20
   5   2  -1   61.19    7.60
   5   2  -1   81.99    6.60
   5   2  -1   82.99    6.70
  -5   2   1   80.99    7.20
   5   2  -1   80.39    6.50
   5   2  -1   87.59    6.10
  -4  -2   1    8.00    1.80
  -4  -2   1   10.00    2.60
  -4  -2   1   15.60    2.40
   4  -2  -1    5.20    2.80
  -4  -2   1    7.90    1.90
  -4   2   1    6.60    2.80
   4   2  -1   11.60    2.40
   4   2  -1   10.40    3.00
   4   2  -1   10.90    2.40
  -3  -2   1    0.00    1.10
   3  -2  -1    5.90    4.10
  -3  -2   1   -4.30    2.20
  -3  -2   1    2.60    1.30
  -3  -2   1   -0.90    1.30
  -3  -2   1    1.20    1.30
   3  -2  -1    6.90    3.70
   3   2  -1   -2.50    1.50
   3   2  -1    1.70    1.40
   3   2  -1   -2.40    2.40
   3   2  -1   -1.70    1.60
  -2  -2   1  705.43   46.30
  -2  -2   1  757.92   46.60
  -2  -2   1  725.73   46.30
   2  -2  -1  654.83   46.60
   2  -2  -1  695.63   47.40
   2  -2  -1  776.02   47.00
   2   2  -1  755.02   46.30
  -2   2   1  739.63   47.00
   1  -2  -1 6653.43  441.06
   1   2  -1 7292.47  440.76
   0  -2   1  872.01   58.49
   0  -2  -1  929.01   58.89
   0  -2  -1  845.02   58.39
   0  -2  -1  877.61   58.39
   0  -2   1  958.20   58.39
   0   2  -1 1065.09   58.99
   0   2  -1  927.81   58.59
   0   2   1  779.12   58.59
   0   2  -1  993.60   58.49
   0   2   1  947.11   59.09
   1  -2   1   15.50    2.40
   1  -2   1   11.50    4.10
  -1  -2  -1   19.60    2.30
  -1   2  -1   14.70    4.40
   1   2   1   24.60    3.90
  -1   2  -1   16.60    2.80
  -2  -2  -1   12.10    1.60
  -2  -2  -1   12.00    1.60
  -2  -2  -1   13.90    2.20
   2  -2   1    9.50    2.20
   2   2   1   14.00    2.00
   2   2   1   17.20    2.00
   2   2   1   11.00    1.60
  -3  -2  -1  186.18   13.40
   3  -2   1  204.68   13.90
   3  -2   1  239.28   14.50
  -3  -2  -1  207.58   13.10
  -3  -2  -1  177.88   13.00
  -3  -2  -1  205.88   13.20
  -3  -2  -1  187.78   13.00
   3   2   1  196.78   13.10
  -3   2  -1  212.98   13.70
   3   2   1  187.48   13.00
   3   2   1  207.98   13.20
   3   2   1  185.38   13.70
  -4  -2  -1  470.25   33.20
  -4  -2  -1  496.35   33.60
  -4  -2  -1  534.15   33.40
  -4  -2  -1  503.75   33.20
   4   2   1  520.05   33.60
   4   2   1  548.35   33.30
   4   2   1  510.05   33.80
   4   2   1  499.45   33.30
  -4   2  -1  620.84   33.80
   4   2   1  495.35   33.30
  -5  -2  -1 1824.32  117.99
   5  -2   1 1926.91  118.29
  -5  -2  -1 1959.60  117.69
   5  -2   1 1836.82  118.29
  -5  -2  -1 1874.81  117.79
   5  -2   1 1832.72  118.59
   5  -2   1 1822.12  117.79
  -5  -2  -1 1817.52  117.69
  -5   2  -1 1650.93  118.29
   5   2   1 1907.01  117.99
   5   2   1 1949.41  117.79
   5   2   1 1817.62  118.19
  -5   2  -1 1721.53  117.99
  -5   2  -1 1882.91  117.69
   5   2   1 1916.31  117.79
   5   2   1 1961.70  117.79
  -6  -2  -1  240.58   16.10
  -6  -2  -1  213.48   15.70
  -6  -2  -1  245.78   15.80
  -6  -2  -1  227.08   15.90
   6  -2   1  265.77   16.70
   6   2   1  241.38   15.70
   6   2   1  237.68   16.10
   6   2   1  225.28   16.00
   6   2   1  228.48   15.90
   6   2   1  235.48   16.60
  -7  -2  -1   55.99    6.00
   7  -2   1   59.79    8.60
   7  -2   1   77.69   10.20
   7  -2   1   43.30    7.40
   7  -2   1   73.89   10.50
  -7  -2  -1   53.59    5.40
  -7  -2  -1   56.19    5.30
  -7  -2  -1   60.79    6.00
   7   2   1   64.39    6.30
  -7   2  -1   49.99    7.60
   7   2   1   62.69    5.20
  -7   2  -1   54.79    7.20
   7   2   1   67.39    6.30
   7   2   1   44.60    7.40
   7   2   1   58.19    6.20
  -7   2  -1   60.39    6.00
  -7   2  -1   49.99    5.60
  -8  -2  -1  553.24   33.30
  -8  -2  -1  591.84   33.30
   8  -2   1  473.15   34.10
   8  -2   1  437.06   36.00
   8  -2   1  494.95   34.30
   8  -2   1  514.75   34.60
  -8  -2  -1  563.14   33.70
  -8  -2  -1  436.06   34.70
   8   2   1  468.55   34.20
  -8   2  -1  485.95   33.30
   8   2   1  531.25   33.70
  -8   2  -1  441.06   33.40
  -8   2  -1  520.25   34.70
   8   2   1  592.64   33.30
   8   2   1  560.44   33.70
   8   2   1  580.24   33.90
  -8   2  -1  429.06   35.60
   9  -2   1   58.99   10.50
  -9  -2  -1   41.50    5.50
   9  -2   1   34.20    7.00
  -9  -2  -1   41.50    5.80
  -9  -2  -1   44.40    5.40
   9  -2   1   44.60    7.20
   9   2   1   50.99    8.20
  -9   2  -1   47.40    9.00
  -9   2  -1   48.80    6.60
  -9   2  -1   54.09    6.10
   9   2   1   38.40    5.50
   9   2   1   35.40    5.50
  10  -2   1  197.18   19.90
  10  -2   1  231.78   20.30
  10  -2   1  203.68   21.00
 -10  -2  -1  269.47   17.10
 -10  -2  -1  260.07   17.10
 -10  -2  -1  240.48   18.00
 -10   2  -1  224.28   17.50
  10   2   1  249.28   18.10
  10   2   1  261.87   17.00
 -10   2  -1  223.68   17.20
 -10   2  -1  257.77   21.40
 -11  -2  -1  240.78   16.00
 -11  -2  -1  219.28   15.70
  11  -2   1  180.28   18.70
 -11  -2  -1  220.88   16.60
  11  -2   1  168.38   20.90
 -11   2  -1  196.68   16.40
 -11   2  -1  221.98   20.50
  11   2   1  239.18   15.70
  11   2   1  227.18   17.00
  12  -2   1   76.99   10.50
  12  -2   1   46.30   15.00
 -12  -2  -1   80.39    8.20
 -12  -2  -1   72.99    8.60
 -12  -2  -1   73.99    9.60
 -12   2  -1   56.59    9.60
  12   2   1   72.59    8.10
 -12   2  -1   65.49    8.30
  12   2   1   82.39   10.80
 -13  -2  -1    5.80    5.70
  13  -2   1   14.30    9.40
 -13  -2  -1    6.70    4.70
 -13   2  -1    9.20    5.50
  13   2   1   14.10    5.10
  13   2   1   11.50    6.50
 -14  -2  -1    3.30    6.40
 -14  -2  -1   20.50    5.80
  14  -2   1   29.30   10.40
 -14  -2  -1   23.80    6.70
  14   2   1   13.70    7.40
  14   2   1   17.90    6.00
 -14   2  -1   12.40    6.40
  15  -2   1   21.50   10.50
 -15  -2  -1   36.40    7.00
 -15  -2  -1   14.20    7.70
 -15  -2  -1   35.60    8.50
  15   2   1   40.70    7.80
 -15   2  -1   27.40    8.30
  15   2   1   39.30    9.30
  15   3  -1   14.00   10.20
 -14  -3   1   11.60    5.20
 -14  -3   1   11.10    8.30
 -14  -3   1   14.10    6.80
  14  -3  -1   -8.70   12.30
  14   3  -1   26.00    6.40
  14   3  -1   10.60    7.90
 -13  -3   1    8.10    4.70
 -13  -3   1   13.10    5.50
  13  -3  -1   22.30   11.70
 -13  -3   1   17.90    7.40
 -13   3   1   31.80    7.50
  13   3  -1   16.20    7.20
  13   3  -1   19.60    5.70
 -12  -3   1    2.60    4.40
 -12  -3   1    1.20    4.10
  12  -3  -1    6.20   11.20
 -12  -3   1   -2.60    5.80
  12   3  -1   10.10    6.20
  12   3  -1    6.40    4.70
 -12   3   1   15.10    6.50
 -11  -3   1   80.59   10.30
 -11  -3   1   92.69   11.40
  11  -3  -1   71.89   12.90
  11  -3  -1   67.49   13.60
 -11  -3   1   75.29    8.20
 -11   3   1   63.19   10.50
  11   3  -1   92.69    8.50
 -11   3   1  101.29   14.60
  11   3  -1   76.49   10.80
 -11   3   1   70.39    9.10
  10  -3  -1   27.70    9.90
 -10  -3   1    9.20    4.80
  10  -3  -1   23.20    9.50
 -10   3   1   21.40    5.70
   9  -3  -1   92.79   13.50
   8  -3  -1  150.98   14.90
   8  -3  -1  158.08   15.30
  -8  -3   1  172.18   12.30
  -8  -3   1  165.78   12.20
  -8  -3   1  192.28   13.30
   8   3  -1  162.98   12.50
   8   3  -1  165.38   13.50
  -8   3   1  196.68   13.50
  -8   3   1  183.78   13.80
   7  -3  -1    1.30    4.90
  -7  -3   1    1.40    2.40
  -7  -3   1   -1.60    2.20
   7  -3  -1   -4.80    8.70
  -7  -3   1   -0.20    2.20
   7  -3  -1   -3.70    5.90
  -7  -3   1    3.60    3.30
   7   3  -1    4.60    4.50
   7   3  -1    0.10    2.50
   7   3  -1    4.40    3.40
   7   3  -1   -4.00    3.20
  -7   3   1    1.50    4.00
  -7   3   1   -1.60    5.80
   7   3  -1    8.00    3.70
  -7   3   1   -5.80    5.80
  -6  -3   1  167.78   12.10
  -6  -3   1  166.18   12.00
  -6  -3   1  173.78   12.30
   6  -3  -1  166.88   15.70
   6  -3  -1  160.38   15.60
  -6  -3   1  196.18   13.10
   6   3  -1  178.48   12.70
   6   3  -1  183.38   14.00
   6   3  -1  191.18   12.70
   6   3  -1  174.98   12.30
  -6   3   1  184.78   14.50
   5  -3  -1   73.29   10.30
   5  -3  -1   88.59   10.60
   5  -3  -1   50.19   10.10
  -5   3   1   74.89    9.10
  -5   3   1   95.39    8.40
  -5   3   1   65.09   10.00
   4  -3  -1   39.70    6.80
   4  -3  -1   44.70    8.20
   4  -3  -1   39.40    7.60
  -4   3   1   35.60    6.70
   4   3  -1   52.39    4.60
  -4   3   1   38.80    5.50
  -4   3   1   39.20    5.80
   3  -3  -1   88.19    9.00
  -3  -3   1   77.19    6.20
  -3  -3   1   80.29    6.60
   3  -3  -1   86.09    8.10
  -3  -3   1   81.59    6.00
  -3  -3   1   83.99    7.20
   3  -3  -1   79.29    8.50
   3  -3  -1   92.59    7.00
   3   3  -1   96.59    6.40
  -3   3   1   84.79    8.50
   3   3  -1   84.69    7.60
   3   3  -1   96.89    6.70
   2  -3  -1   17.50    3.10
  -2  -3   1   18.90    3.10
   2  -3  -1   25.40    4.70
  -2  -3   1   20.20    2.70
   2  -3  -1   14.10    5.50
  -2   3   1   12.60    5.00
   2   3  -1   21.30    3.20
   2   3  -1   21.60    3.30
   1  -3  -1  402.86   27.80
  -1  -3   1  462.25   27.70
  -1  -3   1  425.16   27.90
   1  -3  -1  394.76   28.70
  -1   3   1  413.76   28.80
  -1   3   1  392.76   27.70
   1   3  -1  468.85   28.20
   1   3  -1  464.55   27.80
   0  -3   1  403.96   23.90
   0  -3  -1  352.86   23.70
   0  -3  -1  339.57   22.70
   0  -3   1  331.87   22.70
   0   3  -1  324.47   23.20
   0   3  -1  365.46   23.70
   0   3   1  324.67   22.70
   0   3  -1  347.37   22.80
   0   3   1  355.46   24.00
   2  -3   1   50.59    6.90
   2  -3   1   49.70    6.70
  -2  -3  -1   38.30    4.00
   2  -3   1   46.30    4.90
  -2  -3  -1   41.80    4.10
  -2  -3  -1   56.79    4.70
   2   3   1   49.60    6.40
   2   3   1   48.90    5.30
   2   3   1   46.60    4.50
  -2   3  -1   49.70    6.40
   3  -3   1 1521.75   88.79
   3  -3   1 1363.86   88.29
  -3  -3  -1 1333.47   87.89
   3  -3   1 1476.75   88.09
  -3  -3  -1 1270.97   87.69
  -3  -3  -1 1286.07   87.99
  -3  -3  -1 1398.66   87.79
   3  -3   1 1455.15   88.99
  -3  -3  -1 1365.76   88.09
   3   3   1 1397.16   88.29
  -3   3  -1 1400.76   88.19
   3   3   1 1407.26   88.59
   3   3   1 1375.76   87.99
  -3   3  -1 1447.66   88.79
   3   3   1 1291.67   87.69
   3   3   1 1350.46   87.69
  -4  -3  -1  124.09    8.60
  -4  -3  -1  130.49    9.20
  -4  -3  -1  113.49    8.50
  -4  -3  -1  130.39    8.60
  -4  -3  -1  122.49    8.80
   4   3   1  128.79    9.80
   4   3   1  111.89    8.70
   4   3   1  134.39    9.00
   4   3   1  113.09    8.70
   4   3   1  118.49    8.70
  -5  -3  -1  235.28   16.80
   5  -3   1  262.27   18.50
   5  -3   1  299.77   19.40
   5  -3   1  288.87   19.80
  -5  -3  -1  247.58   16.90
  -5  -3  -1  230.58   17.10
  -5  -3  -1  256.67   17.50
  -5   3  -1  261.67   19.00
   5   3   1  237.88   17.90
   5   3   1  242.48   17.00
  -5   3  -1  300.17   18.30
   5   3   1  246.28   17.10
   5   3   1  241.78   17.00
   6  -3   1  859.61   59.29
  -6  -3  -1  941.01   57.99
  -6  -3  -1  919.51   57.49
   6  -3   1  880.41   58.89
   6  -3   1  863.01   59.29
  -6  -3  -1  912.51   57.49
  -6  -3  -1  878.21   57.69
   6   3   1  900.11   57.69
   6   3   1  944.01   57.69
   6   3   1  901.91   58.39
   6   3   1  938.01   57.69
  -6   3  -1  863.21   58.39
  -7  -3  -1  130.89    9.60
  -7  -3  -1  150.88   10.40
   7  -3   1  106.19   15.00
   7  -3   1  133.29   14.00
  -7  -3  -1  136.49    9.80
  -7  -3  -1  119.69    9.80
   7   3   1  128.39    9.90
   7   3   1  140.69   10.40
  -7   3  -1  129.99   13.10
  -8  -3  -1  167.18   11.50
  -8  -3  -1  168.68   12.40
   8  -3   1  173.98   16.10
  -8  -3  -1  179.48   11.60
   8  -3   1  126.99   13.80
   8   3   1  145.69   12.90
  -8   3  -1  147.29   12.10
  -8   3  -1  157.28   15.40
   8   3   1  157.88   11.80
   9  -3   1   94.49   13.40
   9  -3   1  135.39   15.20
   9  -3   1   83.29   14.30
  -9  -3  -1  124.39    9.10
  -9  -3  -1  118.89    9.20
  -9  -3  -1  114.29   10.60
   9   3   1   92.09    9.30
  -9   3  -1  122.69    9.80
  -9   3  -1   94.99   15.30
  -9   3  -1  119.29   10.10
   9   3   1   84.19   11.10
  10  -3   1   99.49   15.70
 -10  -3  -1   97.99    8.60
  10  -3   1   89.69   12.50
 -10  -3  -1  103.39    8.60
  10   3   1   80.59   13.30
  10   3   1   87.89    9.00
 -10   3  -1   99.39    9.30
 -10   3  -1   98.99   10.20
 -11  -3  -1  119.29   10.30
  11  -3   1   88.19   13.40
 -11  -3  -1  111.19   11.60
 -11  -3  -1   96.19    9.30
  11   3   1   93.99    9.50
  11   3   1  103.19   11.80
 -11   3  -1   92.69   16.00
 -11   3  -1   84.69   10.80
 -12  -3  -1    4.00    4.60
 -12  -3  -1    1.00    4.40
  12  -3   1    6.60    9.60
 -12  -3  -1    0.40    5.70
  12   3   1   -1.00    4.70
  12   3   1    2.70    6.50
 -12   3  -1    3.60    5.30
 -12   3  -1    9.40   10.00
 -13  -3  -1    5.60    5.30
 -13  -3  -1    3.40    5.00
  13  -3   1   15.30   11.90
 -13  -3  -1    2.20    6.30
  13   3   1    6.10    5.50
 -13   3  -1   12.20    6.00
  13   3   1    8.40    7.00
 -13   3  -1   16.90   10.80
 -14  -3  -1   12.10    5.80
  14  -3   1   11.40   12.90
 -14  -3  -1   13.40    6.40
 -14  -3  -1    6.40    7.30
  14   3   1   15.40    8.10
  14   3   1   10.60    6.40
 -14  -4   1   20.60    6.50
  14  -4  -1   30.60   19.40
 -14  -4   1   23.80    9.10
 -14  -4   1   14.70    6.70
  14   4  -1   26.30    6.80
 -14   4   1   11.60   18.10
 -13  -4   1    0.90    5.10
  13  -4  -1   -1.30   14.70
 -13  -4   1   13.40    5.80
 -13  -4   1    8.80    7.90
  13   4  -1    9.80    5.80
 -12  -4   1   10.20    4.80
 -12  -4   1   -1.80    6.30
 -12  -4   1    2.70    4.70
  12  -4  -1    0.20   13.20
 -12   4   1    9.10    7.80
  12   4  -1    6.80    4.90
 -11  -4   1   39.00    5.80
  11  -4  -1   44.30   15.30
 -11  -4   1   38.00    5.80
 -11  -4   1   49.50    7.30
 -11   4   1   49.70    7.90
  11   4  -1   47.50    7.50
 -10  -4   1   20.60    5.30
  10  -4  -1   25.70   11.30
 -10  -4   1   24.80    4.70
  10  -4  -1    4.20   10.10
 -10  -4   1   20.80    4.30
 -10   4   1   18.00    6.30
 -10   4   1   43.20   13.40
  -9  -4   1  594.84   38.00
  -9  -4   1  545.25   37.10
   9  -4  -1  482.05   38.80
  -9  -4   1  600.64   36.80
   8  -4  -1  254.57   24.30
  -8  -4   1  284.47   18.50
  -8  -4   1  270.37   18.20
  -8  -4   1  278.07   19.40
  -8   4   1  280.77   24.30
   8   4  -1  243.48   18.80
  -7  -4   1  288.87   18.30
  -7  -4   1  266.37   19.10
  -7  -4   1  278.87   18.10
   7  -4  -1  246.98   23.20
   7   4  -1  258.57   18.70
  -7   4   1  275.17   21.40
  -6  -4   1   66.99    6.00
  -6  -4   1   72.69    6.30
   6  -4  -1  102.39   14.20
  -6  -4   1   65.39    6.40
  -6  -4   1   78.19    7.70
   6   4  -1   76.89    7.10
  -5  -4   1  911.11   56.69
  -5  -4   1  817.52   55.99
  -5  -4   1  875.81   55.79
   5  -4  -1  868.01   58.29
   5  -4  -1  856.61   58.49
   5  -4  -1  765.02   56.29
  -5  -4   1  912.91   55.89
  -5   4   1  919.41   57.49
   5   4  -1  925.71   56.09
   5   4  -1  822.52   56.89
   5   4  -1  894.61   56.29
   5   4  -1  956.00   56.09
  -5   4   1  836.42   57.69
  -4  -4   1  217.98   15.90
  -4  -4   1  204.88   14.80
   4  -4  -1  219.88   15.80
   4  -4  -1  213.18   17.90
  -4  -4   1  222.98   14.60
   4  -4  -1  241.68   18.20
  -4  -4   1  203.28   15.00
   4  -4  -1  223.18   19.10
   4   4  -1  227.08   15.40
  -4   4   1  246.28   16.60
   4   4  -1  229.48   14.80
   4   4  -1  203.68   16.30
  -4   4   1  218.28   17.30
  -3  -4   1  775.92   49.00
   3  -4  -1  770.62   49.50
  -3  -4   1  744.13   49.20
   3  -4  -1  761.72   50.09
  -3  -4   1  789.52   49.50
   3  -4  -1  703.23   50.59
   3  -4  -1  728.43   50.59
   3   4  -1  832.22   49.40
   3   4  -1  791.52   49.80
  -3   4   1  742.43   50.59
  -2  -4   1   28.00    3.80
  -2  -4   1   16.70    3.90
   2  -4  -1   24.50    6.70
   2  -4  -1   25.90    4.10
   2   4  -1   33.40    4.70
   2   4  -1   23.30    4.30
   1  -4  -1  762.72   43.40
   1  -4  -1  651.33   44.50
  -1  -4   1  632.44   43.10
  -1  -4   1  678.83   44.10
   1   4  -1  621.04   43.20
  -1   4   1  709.43   44.70
  -1   4   1  723.13   43.40
   1   4  -1  583.44   43.50
   0  -4  -1   -9.60    5.10
   0  -4  -1    2.50    2.40
   0   4  -1   -6.20    5.40
   0   4   1   -0.70    2.60
   0   4   1   -2.80    5.40
   1  -4   1  108.69   11.40
  -1  -4  -1  102.79    8.00
   1  -4   1  119.99    8.50
   1  -4   1  108.09   10.70
  -1   4  -1  113.89   10.50
   1   4   1   89.79    8.20
  -1   4  -1   97.19    8.50
   2  -4   1  473.75   32.50
  -2  -4  -1  474.35   32.20
   2  -4   1  496.55   34.00
  -2  -4  -1  473.35   32.40
   2  -4   1  534.35   34.00
   2   4   1  513.25   32.50
   2   4   1  505.95   33.70
   2   4   1  502.45   32.90
  -2   4  -1  508.45   33.70
  -3  -4  -1  140.19   10.60
  -3  -4  -1  148.09   11.20
  -3  -4  -1  171.48   10.80
   3  -4   1  154.78   11.50
   3  -4   1  153.88   13.80
   3   4   1  165.78   11.40
   3   4   1  134.79   12.20
   3   4   1  132.59   10.60
  -3   4  -1  187.48   13.70
   4  -4   1  155.28   14.70
  -4  -4  -1  163.18   11.90
  -4  -4  -1  181.38   11.40
  -4  -4  -1  170.08   11.30
   4  -4   1  164.78   12.30
  -4  -4  -1  152.88   11.60
   4  -4   1  172.68   15.50
  -4  -4  -1  153.58   11.10
  -4   4  -1  160.88   14.30
   4   4   1  147.99   12.80
   4   4   1  158.38   11.80
   4   4   1  162.08   11.10
   4   4   1  162.98   11.30
  -4   4  -1  140.39   13.60
  -5  -4  -1  295.17   20.30
   5  -4   1  301.07   21.10
   5  -4   1  262.67   23.10
  -5  -4  -1  297.57   20.60
  -5  -4  -1  308.47   20.10
   5  -4   1  339.67   24.20
  -5  -4  -1  327.87   20.30
  -5  -4  -1  297.37   20.90
   5   4   1  321.37   20.40
   5   4   1  251.87   21.60
   5   4   1  325.07   20.30
   5   4   1  311.37   20.60
   5   4   1  329.77   20.30
  -5   4  -1  300.37   21.90
  -6  -4  -1  337.27   22.20
  -6  -4  -1  352.16   21.60
   6  -4   1  305.17   25.50
  -6  -4  -1  327.57   21.50
   6  -4   1  300.67   22.30
   6   4   1  333.67   21.60
  -6   4  -1  308.57   23.80
   6   4   1  327.47   22.00
  -7  -4  -1   25.30    4.70
  -7  -4  -1   49.50    5.50
   7  -4   1   37.30    9.30
  -7  -4  -1   37.90    5.00
   7   4   1   39.10    5.50
   7   4   1   36.50    5.20
  -7   4  -1   39.70    8.30
   8  -4   1  529.75   39.00
  -8  -4  -1  540.45   35.20
  -8  -4  -1  537.75   35.80
  -8  -4  -1  525.85   35.10
  -8   4  -1  580.74   37.90
   8   4   1  515.25   35.50
  -9  -4  -1  366.96   24.70
  -9  -4  -1  349.96   24.10
  -9  -4  -1  355.26   23.80
   9   4   1  338.57   24.30
  -9   4  -1  352.66   27.30
 -10  -4  -1  475.75   30.90
 -10  -4  -1  448.86   29.60
  10  -4   1  387.96   35.60
 -10  -4  -1  461.25   29.80
  10   4   1  417.36   29.90
 -10   4  -1  468.55   33.60
  11  -4   1   24.10   13.50
 -11  -4  -1    7.80    6.10
 -11  -4  -1    6.50    4.50
 -11  -4  -1    9.30    4.40
  11   4   1   14.70    5.00
 -11   4  -1   12.10    5.50
 -11   4  -1   26.90   10.40
 -12  -4  -1  100.59   13.10
 -12  -4  -1   86.19    9.90
 -12  -4  -1  103.69   10.10
  12  -4   1   67.69   16.50
  12   4   1   95.39   10.40
 -13  -4  -1    4.40    7.40
 -13  -4  -1    0.40    5.20
 -13  -4  -1    0.50    5.50
  13  -4   1   13.40   14.00
  13   4   1    5.90    5.80
 -14  -4  -1    1.40    7.10
 -14  -4  -1    8.70    8.20
  14  -4   1    0.50   16.60
 -14  -4  -1   -3.70    6.50
  14   4   1    1.70    6.80
 -13  -5   1   -0.20    6.00
 -13  -5   1  -10.80    8.20
  13  -5  -1  -32.70   19.90
 -13  -5   1   -3.80    5.50
  13   5  -1   -6.20    6.50
  12  -5  -1    7.90   17.50
 -12  -5   1    1.40    5.00
 -12  -5   1    6.20    7.00
 -12  -5   1    4.80    5.30
  12   5  -1    1.20    6.10
  11  -5  -1   -9.80   17.00
 -11  -5   1    9.30    4.70
 -11  -5   1    9.50    6.40
 -11  -5   1   -1.90    4.60
  11   5  -1   15.10    6.00
 -10  -5   1   48.20    5.90
  10  -5  -1   30.80   16.30
 -10  -5   1   40.80    7.10
  10   5  -1   55.39    8.60
  -9  -5   1   14.50    4.50
  -9  -5   1    4.70    4.90
   9  -5  -1    8.70   12.80
  -9  -5   1   14.20    3.80
  -9   5   1   27.40   13.50
   9   5  -1   10.40    5.00
  -8  -5   1    0.50    4.70
   8  -5  -1   10.60   12.00
  -8  -5   1    9.90    3.30
  -8  -5   1    9.90    3.60
   8   5  -1    1.30    4.30
   8   5  -1   13.70    3.80
  -7  -5   1   44.20    6.10
   7  -5  -1   41.30   12.70
   7   5  -1   39.50    6.20
   7   5  -1   46.00    7.30
   6  -5  -1  512.35   41.90
  -6  -5   1  598.34   36.60
  -6  -5   1  584.64   37.60
  -6   5   1  515.25   39.90
   6   5  -1  594.54   37.50
  -5  -5   1   40.00    7.00
   5  -5  -1   32.60   10.40
  -5   5   1   35.70   10.20
   5   5  -1   39.30    6.50
   4  -5  -1  927.21   58.79
  -4  -5   1  854.61   55.89
  -4   5   1  790.12   57.39
   4   5  -1  872.81   55.79
  -3  -5   1  135.99   11.50
   3  -5  -1  150.68   14.60
   3  -5  -1  132.79   17.30
   3   5  -1  118.79   12.40
   3   5  -1  150.68   11.10
  -3   5   1  117.59   14.30
  -2  -5   1   88.99    8.80
   2  -5  -1  102.09   11.80
   2   5  -1   89.29    8.10
   2   5  -1   80.59    9.40
  -2   5   1   59.29   11.70
  -1  -5   1  214.88   15.80
  -1  -5   1  232.28   17.80
  -1  -5   1  208.98   15.60
   1  -5  -1  206.38   16.20
  -1   5   1  218.88   15.80
   1   5  -1  228.58   18.00
   1   5  -1  230.78   16.30
   1   5  -1  221.28   15.70
  -1   5   1  206.88   18.70
   0  -5   1   61.69   10.30
   0  -5  -1   68.89   10.40
   0  -5   1   46.70    6.50
   0  -5  -1   61.19    6.60
   0   5  -1   53.49    7.00
   0   5  -1   64.29   10.70
   0   5   1   86.09   11.40
   1  -5   1    7.70    6.90
   1  -5   1    6.90    7.60
  -1  -5  -1   -3.10    2.70
   1  -5   1    5.90    3.60
  -1   5  -1    9.80    4.20
  -1   5  -1    0.20    7.10
   1   5   1    1.80    7.00
   1   5   1    3.20    3.30
   2  -5   1    9.80    8.50
  -2  -5  -1    4.00    3.10
  -2   5  -1   15.70    7.60
   2   5   1   -5.10    3.30
   2   5   1    5.80    7.20
   2   5   1   -3.40    4.00
  -3  -5  -1  355.56   25.50
   3  -5   1  429.16   29.00
   3   5   1  340.27   26.30
   3   5   1  374.66   25.60
  -3   5  -1  417.06   28.10
  -4  -5  -1   -3.50    3.50
   4  -5   1   15.20    8.90
  -4  -5  -1    3.20    2.90
   4   5   1    3.10    3.60
  -4   5  -1    4.10    7.80
  -5  -5  -1  198.58   14.60
  -5  -5  -1  213.18   14.00
   5  -5   1  189.18   22.00
   5   5   1  204.98   13.80
   5   5   1  199.48   14.70
  -5   5  -1  191.18   17.00
  -5   5  -1  167.58   18.80
  -6  -5  -1   47.50    5.30
  -6  -5  -1   30.30    5.20
  -6  -5  -1   41.00    4.90
   6   5   1   35.50    5.90
   6   5   1   34.10    4.70
  -7  -5  -1    3.70    3.90
   7  -5   1  -15.30   10.50
   7   5   1    1.20    3.40
   7   5   1   -8.60    4.10
  -8  -5  -1   89.59    8.30
  -8  -5  -1  102.99    8.70
  -8  -5  -1   80.99    9.70
   8   5   1   65.79    9.30
   8   5   1   81.29    8.40
   9  -5   1  142.99   26.40
  -9  -5  -1  185.88   13.60
  -9  -5  -1  163.18   14.90
  -9  -5  -1  208.28   14.10
  -9   5  -1  155.28   19.90
   9   5   1  169.88   14.40
 -10  -5  -1   75.59    9.40
 -10  -5  -1   73.19    8.90
  10  -5   1   62.99   17.40
 -10  -5  -1   73.99   10.80
  10   5   1   66.99    9.90
  11  -5   1    4.00   17.00
 -11  -5  -1    0.50    6.20
 -11  -5  -1   -3.70    4.90
 -11  -5  -1    0.70    4.90
 -11   5  -1    5.20   10.90
  11   5   1   -0.30    5.90
 -12  -5  -1    4.20    5.90
  12  -5   1  -11.20   17.60
 -12  -5  -1   -2.40    5.40
 -12  -5  -1   -5.50    6.80
  12   5   1    1.90    6.50
  13  -5   1  -31.10   20.80
 -13  -5  -1    4.10    8.90
 -13  -5  -1    8.40    6.40
  13   5   1   -5.70    7.20
  11  -6  -1   -3.80   24.50
 -11  -6   1   37.30    7.00
 -11  -6   1   36.50    8.00
 -11  -6   1   38.00    6.40
  11   6  -1   29.10    7.50
  10  -6  -1  -14.00   19.70
 -10  -6   1    0.10    4.80
 -10  -6   1    0.70    6.40
 -10  -6   1   -5.60    5.70
  10   6  -1    4.80    6.00
  -9  -6   1   27.20    5.60
  -9  -6   1   31.40    6.80
   9  -6  -1   24.00   18.80
   9   6  -1   38.20    6.90
  -8  -6   1   31.70    5.50
   8  -6  -1   27.00   16.60
  -8  -6   1   31.30    6.50
   8   6  -1   28.50    6.50
  -7  -6   1   59.79    9.50
   7  -6  -1   68.39   16.30
   7   6  -1   53.89    8.90
   6  -6  -1   37.40   14.60
  -6  -6   1   58.79    7.60
  -6  -6   1   59.19    7.10
  -6   6   1   86.69   15.10
   6   6  -1   53.99    7.30
  -5  -6   1   48.00    8.60
   5  -6  -1   54.39   16.50
  -5   6   1   33.80   12.40
   5   6  -1   58.69    8.00
   4  -6  -1   19.80   12.50
  -4  -6   1   10.30    4.90
   3  -6  -1   -3.60   10.70
  -3  -6   1    3.30    4.60
   3   6  -1   -1.90    4.20
  -2  -6   1    7.40    4.80
   2  -6  -1   17.40   11.70
  -2   6   1    5.90   10.60
   2   6  -1    5.60    4.50
  -1  -6   1   96.09   10.00
  -1   6   1   83.69   15.00
   1   6  -1  101.79    9.60
   0   6  -1  213.68   21.30
   0   6   1  248.28   18.00
   0   6   1  231.48   21.40
   0   6  -1  243.98   17.80
   1  -6   1  584.04   40.00
   1   6   1  536.35   37.30
   1   6   1  450.45   34.70
  -1   6  -1  525.75   34.70
   1   6   1  502.75   34.30
  -1   6  -1  496.15   37.40
   2  -6   1  197.38   23.10
  -2  -6  -1  154.58   12.80
   2   6   1  153.98   12.90
   2   6   1  181.68   17.30
  -2   6  -1  139.39   17.70
   3  -6   1  100.69   14.20
  -3  -6  -1   79.19    8.70
   3   6   1   78.09    8.80
  -3   6  -1   83.99   15.30
  -4  -6  -1  154.58   13.00
   4  -6   1  147.39   23.10
   4   6   1  176.38   17.80
  -5  -6  -1    1.50    4.60
  -5  -6  -1    9.50    4.10
  -5   6  -1   18.70   12.10
   5   6   1   10.80    4.80
  -6  -6  -1   56.29    8.50
   6   6   1   51.29    8.40
   6   6   1   61.19    7.20
   7  -6   1   32.40   16.10
  -7  -6  -1   47.20    7.10
  -7  -6  -1   54.69    7.80
   7   6   1   43.40    7.10
   8  -6   1   69.99   17.50
  -8  -6  -1   75.99   10.10
  -8  -6  -1   78.89   10.90
  -8  -6  -1   68.79    9.60
   8   6   1   70.09   10.30
   8   6   1   97.39    9.30
   9  -6   1   16.10   17.00
  -9  -6  -1   32.30    6.70
  -9  -6  -1   32.10    5.90
  -9  -6  -1   27.10    6.70
   9   6   1   27.90    6.80
   9   6   1   22.10    5.70
  10  -6   1  -10.00   20.00
 -10  -6  -1   -1.30    6.10
 -10  -6  -1    4.70    5.90
 -10  -6  -1   -0.90    6.50
  10   6   1    5.20    5.90
  10   6   1   10.80    6.20
 -11  -6  -1   -4.00    6.70
 -11  -6  -1   -4.40    6.90
  11  -6   1   -7.30   22.10
 -11  -6  -1    8.50    6.40
  11   6   1   13.10    7.30
 -10  -7   1  -15.90    7.80
 -10  -7   1   -3.60   11.90
  10  -7  -1  -10.00   21.90
  10   7  -1   14.60    7.50
   9  -7  -1  -16.60   20.50
  -9  -7   1   -8.20    6.60
  -9  -7   1   -2.00    6.00
   9   7  -1   -0.80    6.30
  -8  -7   1    0.00    6.30
   8  -7  -1    3.60   21.30
   8   7  -1    2.80    6.10
   7  -7  -1   25.50   20.80
  -7  -7   1   29.20    7.10
   7   7  -1   39.40    7.20
   6  -7  -1   35.90   17.90
  -6  -7   1   -0.70    6.00
  -6   7   1   17.80   16.60
   6   7  -1   13.30    6.20
   5  -7  -1   31.60   18.00
  -5  -7   1   31.20    6.80
  -5   7   1   23.90   15.40
   5   7  -1   21.00    6.50
   4  -7  -1   17.40   15.00
  -4  -7   1   14.40    5.80
  -4   7   1   22.20   14.40
   4   7  -1    7.80    5.70
   3  -7  -1    4.00   14.80
  -3  -7   1   -0.70    6.20
   3   7  -1    1.00    5.60
  -3   7   1    7.20   12.90
  -2  -7   1  300.27   22.40
   2  -7  -1  336.17   33.70
  -2   7   1  265.57   27.90
   2   7  -1  309.27   22.20
   1  -7  -1  252.87   28.30
   1   7  -1  239.28   17.60
   1   7  -1  154.48   26.70
  -1   7   1  165.28   22.80
   0  -7   1    6.10   12.40
   0   7   1    7.40   12.40
   0   7  -1   17.30    7.40
   0   7  -1   20.80   12.60
   0   7   1    9.30    7.00
   1   7   1  102.39   12.30
   1   7   1   91.09   17.90
  -1   7  -1   94.99   18.00
  -2  -7  -1  167.48   15.20
  -2   7  -1  220.08   22.60
   2   7   1  190.58   16.40
   2   7   1  216.68   21.00
   3  -7   1   -6.90   14.70
  -3  -7  -1    3.40    4.90
   3   7   1    2.20   11.40
  -3   7  -1    0.90   13.70
   3   7   1    4.10    5.50
  -4  -7  -1   82.29   10.20
   4  -7   1   73.29   17.60
   4   7   1   74.49   10.60
  -4   7  -1   81.39   17.40
   4   7   1  106.99   15.50
   5  -7   1   -1.30   15.60
  -5  -7  -1    1.70    5.50
  -5   7  -1    3.00   11.70
   5   7   1   11.80    5.90
  -5   7  -1   10.30   15.00
  -6  -7  -1   -3.10    6.00
   6  -7   1  -15.40   16.40
   6   7   1    2.30    5.90
   7  -7   1    3.90   20.50
  -7  -7  -1    9.10    5.60
  -7  -7  -1    0.00    6.30
   7   7   1    5.20    6.40
  -8  -7  -1   -5.00    6.30
  -8  -7  -1    0.80    5.90
   8  -7   1   -9.70   20.60
   8   7   1    7.40    6.70
  -8   7  -1  -11.00   13.80
  -9  -7  -1  -12.50    6.90
  -9  -7  -1   -6.20    6.20
   9  -7   1  -16.30   22.00
   9   7   1    4.80    6.80
  -9   7  -1    4.20   17.40
  -7  -8   1    0.00    7.50
   7  -8  -1   21.00   26.70
   7   8  -1   15.60    7.80
   6  -8  -1   37.30   23.30
  -6  -8   1   -6.80    7.20
   6   8  -1    6.80    7.00
  -6   8   1  -20.90   20.30
  -5  -8   1  -11.50    6.80
   5  -8  -1   13.00   20.90
  -5   8   1  -15.20   19.40
   5   8  -1    6.70    7.00
  -4  -8   1    2.10    7.40
   4  -8  -1   14.60   18.80
  -4   8   1   -7.30   19.50
   4   8  -1    7.30    7.40
   3  -8  -1  -11.00   17.80
  -3  -8   1  -11.20    6.40
   3   8  -1    7.70    7.40
  -3   8   1   -1.70   17.80
   2  -8  -1   42.70   19.70
  -2   8   1   28.50   17.60
   2   8  -1   30.60    9.10
   1  -8  -1   50.89   21.00
   1   8  -1   96.59   15.10
  -1   8   1   62.09   18.70
   0  -8   1   88.79   20.00
   0  -8  -1  102.79   20.00
   0   8   1   69.29   18.30
   0   8  -1   67.89   18.50
   1  -8   1   34.20   21.30
  -1   8  -1    4.60   15.70
   1   8   1   12.30    9.40
   1   8   1   12.00   17.50
   2  -8   1    2.90   18.90
  -2  -8  -1   13.60    6.10
  -2   8  -1   25.40   21.50
   2   8   1   23.00   17.70
   2   8   1   38.50    9.90
   3  -8   1  -14.10   21.90
  -3  -8  -1   17.80    6.60
  -3   8  -1   18.70   17.80
   3   8   1   35.20    8.80
   4  -8   1   40.60   22.30
  -4  -8  -1   64.29    8.90
   4   8   1   70.69   11.80
  -4   8  -1   75.99   21.90
  -5  -8  -1   -3.00    6.90
   5  -8   1   18.70   24.50
  -5   8  -1   18.50   18.80
   5   8   1   13.10    7.70
   6  -8   1   34.90   24.60
  -6  -8  -1   26.50    8.30
   6   8   1   46.20    8.60
   7  -8   1   44.40   27.80
  -7  -8  -1   34.30    8.80
   7   8   1   57.09    9.80
  -2  -9   1   33.20   20.30
  -2  -9   1    6.60    8.70
   2  -9  -1    8.20   23.30
   2   9  -1   22.30   14.80
  -2   9   1    4.20   26.70
  -1  -9   1   44.20   22.70
   1  -9  -1   32.40   24.10
   1   9  -1  -43.60   25.60
  -1   9   1   12.60   22.70
   0  -9   1   67.29   27.90
   0  -9  -1   67.19   27.40
   0   9  -1   41.40   21.80
   0   9   1   38.50   22.10
  -1  -9  -1   43.90   21.80
   1  -9   1    3.40   26.00
   1   9   1    5.40   21.00
  -1   9  -1    2.90   22.70
   2  -9   1   -4.50   26.80
  -2  -9  -1   -8.00    6.80
  -2   9  -1   13.50   22.80
 -15   0   2   20.20    6.90
  15   0  -2   20.70    8.40
 -14   0   2   13.30    6.30
 -14   0   2   10.80    7.00
  14   0  -2   15.10    7.30
 -13   0   2   43.80    6.90
 -13   0   2   43.20    7.50
  13   0  -2   47.60    8.00
  12   0  -2  230.58   18.00
  12   0  -2  188.78   20.60
 -12   0   2  235.58   16.90
 -12   0   2  205.08   16.90
  11   0  -2  162.88   16.20
 -11   0   2  165.58   14.00
  11   0  -2  171.58   15.70
  11   0  -2  175.28   14.90
 -11   0   2  172.78   14.00
  10   0  -2 3606.94  219.08
 -10   0   2 2922.21  218.18
 -10   0   2 3453.35  218.48
 -10   0   2 3514.75  218.48
  10   0  -2 3537.35  218.78
  10   0  -2 3628.24  219.28
  -9   0   2  372.76   27.00
   9   0  -2  426.66   28.40
  -9   0   2  418.26   27.40
  -9   0   2  417.76   27.40
   9   0  -2  411.66   28.10
   9   0  -2  426.06   27.90
   8   0  -2    8.00    4.60
  -8   0   2    3.90    2.20
   8   0  -2    8.50    4.30
  -8   0   2   12.50    3.20
  -8   0   2    6.00    4.60
  -8   0   2    5.80    3.10
   8   0  -2    7.40    3.70
   7   0  -2   46.00    6.60
  -7   0   2   43.20    5.40
   7   0  -2   51.39    5.90
  -7   0   2   49.80    6.90
   7   0  -2   51.19    5.60
  -7   0   2   50.79    5.40
  -6   0   2  441.56   28.10
  -6   0   2  420.46   28.30
   6   0  -2  443.16   28.20
  -6   0   2  414.06   28.10
   6   0  -2  439.16   28.40
   5   0  -2 4791.42  298.77
  -5   0   2 4739.33  298.67
  -5   0   2 4466.05  298.77
   5   0  -2 4802.62  298.77
   5   0  -2 4748.62  298.67
  -5   0   2 4788.82  298.67
   4   0  -2 6648.63  408.26
   4   0  -2 6742.13  408.26
  -4   0   2 5885.61  408.16
   4   0  -2 6498.35  408.26
  -4   0   2 6523.85  408.26
   3   0  -2 5070.79  321.77
   3   0  -2 5010.70  321.77
   3   0  -2 5261.07  321.87
  -3   0   2 5178.08  321.77
  -3   0   2 5037.90  321.77
  -3   0   2 5256.37  321.77
  -3   0   2 4812.52  321.77
   3   0  -2 5106.79  321.87
   2   0  -2  194.08   12.90
  -2   0   2  195.58   12.90
  -2   0   2  186.58   12.90
   2   0  -2  196.58   12.90
  -2   0   2  204.88   12.90
  -2   0   2  201.98   12.90
   2   0  -2  204.98   12.90
   1   0  -2  670.33   41.10
  -1   0   2  662.73   41.10
  -1   0   2  629.14   41.10
   1   0  -2  623.14   41.00
   4   0   2 2344.77  145.89
  -4   0  -2 2127.69  145.79
   4   0   2 2375.16  145.89
   4   0   2 2268.27  145.89
   4   0   2 2426.76  145.89
  -4   0  -2 2284.67  145.99
   5   0   2 7618.84  458.85
   5   0   2 7164.98  458.85
  -5   0  -2 6984.10  458.85
  -5   0  -2 7366.56  458.65
   5   0   2 7211.08  458.75
   5   0   2 7198.28  458.75
  -5   0  -2 7275.27  458.65
  -6   0  -2 1014.80   66.09
  -6   0  -2 1062.69   66.09
  -6   0  -2  977.80   66.39
   6   0   2 1047.80   66.19
   6   0   2 1081.69   66.29
  -6   0  -2 1054.79   66.09
   6   0   2 1019.70   66.29
   6   0   2 1045.30   66.19
   7   0   2   66.89    6.80
   7   0   2   72.99    6.90
   7   0   2   68.49    7.20
   7   0   2   74.19    6.80
  -7   0  -2   74.69    5.90
  -7   0  -2   55.89    7.10
  -7   0  -2   76.39    5.90
  -7   0  -2   74.49    6.00
   8   0   2  705.43   43.00
   8   0   2  686.93   43.10
  -8   0  -2  721.93   42.60
   8   0   2  564.74   42.90
  -8   0  -2  720.73   42.60
   8   0   2  674.53   43.00
  -8   0  -2  651.83   42.60
  -8   0  -2  569.14   43.20
   9   0   2  142.89   11.40
  -9   0  -2  133.49    9.80
  -9   0  -2  130.69    9.80
   9   0   2  139.59   11.60
   9   0   2  131.59   10.80
   9   0   2   99.69   11.00
  -9   0  -2  112.99    9.80
 -10   0  -2   48.60    6.70
  10   0   2   44.30    8.00
 -10   0  -2   45.90    6.00
  10   0   2   57.09    6.60
 -10   0  -2   53.49    6.50
  10   0   2   68.49    9.90
 -11   0  -2  669.83   40.60
 -11   0  -2  615.94   40.50
 -11   0  -2  597.04   40.50
  11   0   2  579.14   41.90
  12   0   2   16.40   14.00
  12   0   2   11.00    5.70
 -12   0  -2    7.30    4.30
 -12   0  -2    7.40    5.20
 -12   0  -2   11.00    5.20
  13   0   2   18.10    6.50
 -13   0  -2    2.80    5.70
 -13   0  -2    7.70    6.30
 -13   0  -2   13.50    5.00
  14   0   2   20.90    7.40
 -14   0  -2    8.10    5.90
 -14   0  -2    4.30    9.50
 -15   0  -2   10.00    7.10
  15   0   2   25.80    8.50
 -15  -1   2   47.50    8.80
 -15  -1   2   51.09    8.00
  15  -1  -2   50.49    9.80
 -15  -1   2   26.40    8.90
  15   1  -2   34.30    9.00
 -15   1   2   42.70    8.60
 -14  -1   2   11.70    7.20
 -14  -1   2    5.10    6.00
  14  -1  -2    8.90    8.20
 -14  -1   2    4.50    5.50
 -14   1   2    0.10    6.10
  14   1  -2    7.20    7.00
 -13  -1   2    2.20    4.90
  13  -1  -2    9.40    7.50
 -13  -1   2    7.20    5.50
 -13   1   2   25.60   12.00
 -13   1   2   -2.70    6.60
  13   1  -2   12.50    6.40
 -12  -1   2   25.00    5.80
 -12  -1   2   29.80    5.40
  12  -1  -2   30.80    7.60
  12  -1  -2   16.90   11.00
 -12  -1   2   24.80    6.00
 -12   1   2   28.00    6.30
  12   1  -2   37.00    6.90
 -12   1   2   19.90    6.70
 -11  -1   2  240.28   16.50
  11  -1  -2  207.28   19.60
 -11  -1   2  238.48   16.70
 -11  -1   2  213.38   16.40
  11   1  -2  245.68   17.30
 -11   1   2  191.28   17.20
 -11   1   2  204.48   16.80
  10  -1  -2  202.58   19.70
  10  -1  -2  233.88   18.90
 -10  -1   2  242.58   16.60
 -10  -1   2  250.07   16.70
 -10  -1   2  238.38   16.50
  10  -1  -2  201.08   19.00
 -10   1   2  210.68   17.10
  10   1  -2  251.97   18.90
  10   1  -2  229.88   17.10
 -10   1   2  230.48   17.10
  10   1  -2  215.58   18.20
  -9  -1   2  375.16   24.50
  -9  -1   2  384.36   24.30
   9  -1  -2  327.17   25.40
   9  -1  -2  355.26   25.70
   9  -1  -2  345.07   25.80
  -9  -1   2  377.06   24.40
   9   1  -2  410.96   25.70
  -9   1   2  342.37   24.80
   9   1  -2  366.36   25.40
  -9   1   2  356.26   24.50
   9   1  -2  368.56   25.50
   9   1  -2  358.76   24.70
  -8  -1   2  189.98   13.10
   8  -1  -2  186.98   14.80
   8  -1  -2  171.38   14.70
  -8  -1   2  175.28   13.10
  -8  -1   2  179.78   13.70
  -8  -1   2  199.88   13.10
   8   1  -2  190.48   14.20
   8   1  -2  194.58   13.30
   8   1  -2  197.08   14.10
  -8   1   2  176.48   13.40
   8   1  -2  181.18   14.20
  -8   1   2  159.28   15.30
   7  -1  -2  134.89   12.30
   7  -1  -2  128.09   12.00
   7  -1  -2  165.58   12.20
  -7  -1   2  156.48   11.20
  -7  -1   2  147.89   11.10
  -7  -1   2  164.28   11.20
  -7  -1   2  163.38   11.50
  -7   1   2  136.19   11.50
   7   1  -2  147.99   12.00
  -7   1   2  168.28   13.00
   7   1  -2  169.88   11.10
   7   1  -2  172.68   12.10
  -7   1   2  134.49   11.60
   7   1  -2  163.88   12.00
  -6  -1   2  226.08   15.10
  -6  -1   2  223.18   14.80
  -6  -1   2  207.38   15.10
   6  -1  -2  222.08   15.40
  -6  -1   2  223.98   14.90
   6  -1  -2  232.58   15.60
   6  -1  -2  219.78   15.90
  -6   1   2  234.58   15.20
  -6   1   2  225.18   15.10
   6   1  -2  225.28   15.20
   6   1  -2  218.68   15.60
   6   1  -2  229.38   15.30
   6   1  -2  224.38   14.80
  -6   1   2  182.38   15.90
  -5  -1   2  178.78   13.50
  -5  -1   2  200.68   13.40
   5  -1  -2  183.78   13.90
   5  -1  -2  205.98   14.20
   5  -1  -2  186.48   13.90
  -5  -1   2  206.48   13.40
  -5  -1   2  198.18   13.70
   5   1  -2  167.98   13.20
   5   1  -2  234.28   13.70
   5   1  -2  218.48   14.10
  -5   1   2  187.28   13.70
  -5   1   2  222.28   14.40
   5   1  -2  214.88   13.70
  -4  -1   2 3164.88  208.38
  -4  -1   2 3341.37  208.18
   4  -1  -2 3451.15  208.38
   4  -1  -2 3436.16  208.48
   4  -1  -2 3285.87  208.28
  -4  -1   2 3323.27  208.18
   4   1  -2 3223.08  208.48
  -4   1   2 3211.58  208.48
   4   1  -2 3162.68  208.08
  -4   1   2 3080.49  208.28
   4   1  -2 3391.26  208.28
  -4   1   2 3302.27  208.28
  -4   1   2 3408.96  208.28
  -3  -1   2  275.57   17.10
   3  -1  -2  265.07   17.40
  -3  -1   2  258.67   17.20
   3  -1  -2  292.67   18.10
  -3  -1   2  250.37   17.40
  -3  -1   2  243.78   17.50
   3   1  -2  303.97   17.20
   3   1  -2  241.58   17.30
   3   1  -2  246.68   17.30
  -3   1   2  300.57   17.50
   3   1  -2  239.78   17.60
   1  -1  -2 7137.69  454.75
  -1   1   2 7254.37  454.75
   0  -1  -2  228.18   15.20
   0  -1  -2  243.68   15.30
   0  -1   2  278.67   15.30
   0  -1  -2  238.18   15.30
   0  -1  -2  238.38   15.30
   0   1   2  236.98   15.30
   0   1   2  238.78   15.30
   0   1   2  222.18   15.30
   0   1   2  229.78   15.30
   0   1   2  231.68   15.70
   2  -1   2 3183.28  208.68
   2  -1   2 3539.65  208.68
   2   1   2 3432.76  208.68
  -2   1  -2 3363.36  208.68
  -2   1  -2 2981.80  208.58
  -3  -1  -2 1291.47   82.49
  -3  -1  -2 1391.76   82.29
   3  -1   2 1354.66   82.39
  -3  -1  -2 1226.48   82.19
   3  -1   2 1246.68   82.19
   3  -1   2 1191.78   82.19
   3   1   2 1251.57   82.49
   3   1   2 1439.96   82.49
   3   1   2 1322.97   82.19
   3   1   2 1333.17   82.19
  -3   1  -2 1166.08   82.09
   3   1   2 1436.56   82.19
  -3   1  -2 1213.08   82.39
  -4  -1  -2   -0.60    1.40
  -4  -1  -2   -0.20    1.30
   4   1   2   -1.80    1.50
   4   1   2   -0.70    1.60
   4   1   2   -0.30    1.60
  -4   1  -2    0.80    1.40
   4   1   2    2.80    2.00
  -5  -1  -2  718.13   45.60
  -5  -1  -2  737.73   45.80
  -5  -1  -2  753.92   45.70
   5  -1   2  696.43   45.90
   5  -1   2  677.73   45.70
  -5  -1  -2  744.63   45.80
   5  -1   2  698.13   45.80
   5   1   2  739.13   45.70
   5   1   2  737.43   45.80
   5   1   2  725.63   45.70
  -5   1  -2  699.43   45.60
  -5   1  -2  698.13   45.60
  -5   1  -2  692.83   46.20
   5   1   2  695.13   46.00
   6  -1   2  418.16   27.60
  -6  -1  -2  437.96   27.20
   6  -1   2  377.26   27.10
  -6  -1  -2  432.36   27.10
   6  -1   2  417.86   27.50
  -6  -1  -2  434.36   27.00
  -6  -1  -2  409.86   26.90
  -6   1  -2  382.86   27.80
   6   1   2  449.16   27.20
   6   1   2  414.66   27.40
   6   1   2  420.86   27.10
   6   1   2  427.46   27.20
  -6   1  -2  435.16   27.30
  -6   1  -2  401.06   26.90
  -6   1  -2  381.06   26.90
  -7  -1  -2  432.66   27.80
  -7  -1  -2  422.86   28.00
  -7  -1  -2  431.66   27.50
   7  -1   2  402.56   27.90
  -7  -1  -2  450.05   27.50
   7  -1   2  407.56   28.00
   7  -1   2  427.56   28.20
  -7   1  -2  443.36   28.10
  -7   1  -2  421.36   27.50
   7   1   2  433.86   27.80
   7   1   2  434.66   27.90
  -7   1  -2  385.76   28.70
   7   1   2  381.36   28.00
   7   1   2  436.96   27.80
  -7   1  -2  438.36   27.60
   8  -1   2    6.40    4.00
  -8  -1  -2    2.10    3.40
   8  -1   2    2.40    4.00
  -8  -1  -2    6.70    2.60
  -8  -1  -2    6.60    2.60
  -8  -1  -2    5.00    2.90
   8  -1   2    6.20    4.00
  -8   1  -2    2.60    5.10
   8   1   2    6.70    3.80
   8   1   2   10.60    3.90
  -8   1  -2    6.30    2.80
  -8   1  -2    8.00    5.50
   8   1   2    4.30    3.20
   8   1   2    0.60    3.90
  -8   1  -2    4.90    2.70
  -9  -1  -2   20.10    3.50
   9  -1   2   25.00    5.10
   9  -1   2   16.80    5.60
  -9  -1  -2   10.80    3.80
  -9  -1  -2   18.90    3.70
  -9   1  -2   13.20    6.60
   9   1   2   26.10    5.20
   9   1   2   11.10    5.40
   9   1   2   23.60    5.10
  -9   1  -2   19.60    3.60
   9   1   2   17.30    4.10
 -10  -1  -2   -0.50    3.90
 -10  -1  -2    1.60    3.90
  10  -1   2    8.30    5.30
 -10  -1  -2    1.80    3.40
  10  -1   2    1.40    6.40
  10  -1   2   12.30    7.20
  10   1   2    4.10    4.30
 -10   1  -2    0.00    3.70
 -10   1  -2    0.10    6.80
 -10   1  -2    6.70    4.00
  10   1   2   11.30    6.30
  11  -1   2   -1.80    9.30
 -11  -1  -2   10.40    4.40
 -11  -1  -2    5.90    3.80
  11  -1   2   16.50    9.50
 -11  -1  -2    4.60    4.30
 -11   1  -2   10.80    7.40
  11   1   2    3.50    4.90
  11   1   2   -2.70    8.20
 -11   1  -2    5.50    4.00
 -11   1  -2    7.40    4.30
 -12  -1  -2   96.09   10.30
 -12  -1  -2   92.19    9.40
 -12  -1  -2   79.69   11.00
  12  -1   2   99.29   12.70
 -12   1  -2   74.69    9.90
 -12   1  -2   93.99    9.90
  12   1   2  112.09   11.90
 -12   1  -2  119.39   14.00
 -13  -1  -2   52.29    8.20
 -13  -1  -2   51.09    7.40
 -13  -1  -2   48.90    7.70
  13  -1   2   44.10    8.20
 -13   1  -2   38.20    7.70
  13   1   2   64.49   11.70
 -13   1  -2   50.19   12.40
  14  -1   2    3.40    7.60
 -14  -1  -2    5.00    6.60
 -14  -1  -2    8.00    5.60
 -14  -1  -2    7.00    6.60
 -14   1  -2    7.10    6.00
  14   1   2    5.00    7.20
 -15  -1  -2   -2.00    8.30
  15  -1   2   10.00    8.20
 -15  -1  -2    2.80    6.20
  15   1   2   12.00    6.80
  15   1   2   -1.10    8.20
 -15   1  -2    1.60    7.10
 -15  -2   2   15.10    6.40
 -15  -2   2   13.40    8.40
 -15  -2   2   13.00    8.00
  15  -2  -2   14.00   11.10
  15   2  -2   19.70    6.80
  15   2  -2   15.90    8.40
 -15   2   2   22.30    8.50
 -14  -2   2    5.30    7.10
 -14  -2   2   12.30    6.30
 -14  -2   2    5.40    5.00
  14  -2  -2    0.10    9.30
  14   2  -2   -0.40    5.90
  14   2  -2    5.50    7.00
 -14   2   2    6.30    7.20
 -13  -2   2    6.00    5.30
 -13  -2   2    4.40    4.80
 -13  -2   2   -4.70    6.00
  13  -2  -2   -1.50    9.00
  13   2  -2   -2.60    5.80
 -13   2   2    3.00    6.90
  13   2  -2    8.60    5.20
 -12  -2   2   52.89    7.40
  12  -2  -2   45.80   10.00
 -12  -2   2   55.59    8.00
 -12  -2   2   44.10    7.20
 -12   2   2   65.89   10.00
  12   2  -2   55.29    9.60
 -12   2   2   83.09   13.50
 -12   2   2   66.79   10.10
  11  -2  -2  157.08   19.70
 -11  -2   2  191.98   14.60
  11  -2  -2  189.08   18.00
  11  -2  -2  118.19   19.90
 -11  -2   2  183.78   13.30
 -11  -2   2  149.88   13.60
 -11   2   2  147.79   14.40
 -11   2   2  160.38   14.50
 -11   2   2  202.78   19.80
 -10  -2   2  510.45   31.10
  10  -2  -2  417.46   33.50
 -10  -2   2  484.75   31.10
 -10  -2   2  489.25   31.50
  10  -2  -2  422.36   33.50
 -10   2   2  439.16   31.80
  10   2  -2  492.65   31.50
   9  -2  -2   66.39    8.40
  -9  -2   2   72.29    7.80
  -9  -2   2   70.19    7.00
   9  -2  -2   68.09   11.20
   9  -2  -2   79.19   12.40
  -9  -2   2   71.89    6.90
   9  -2  -2   84.49   11.60
   9   2  -2   71.09    9.60
   9   2  -2   66.19    7.80
  -9   2   2   60.09    8.50
  -9   2   2   47.50    8.40
  -8  -2   2 1100.39   67.09
   8  -2  -2  981.20   67.89
   8  -2  -2  904.31   68.09
   8  -2  -2  992.60   67.39
  -8  -2   2 1143.69   66.69
  -8  -2   2 1065.49   66.99
   8  -2  -2  941.41   67.29
  -8  -2   2 1105.39   66.69
   8   2  -2 1086.19   67.09
  -8   2   2 1046.50   67.89
  -8   2   2 1004.20   66.99
  -8   2   2  997.90   66.79
   8   2  -2 1055.39   66.79
   8   2  -2 1133.49   67.19
   8   2  -2 1060.69   67.59
   7  -2  -2  167.38   13.40
   7  -2  -2  164.58   13.50
   7  -2  -2  149.49   14.90
   7  -2  -2  167.48   14.50
  -7  -2   2  176.08   12.90
  -7  -2   2  179.98   12.10
  -7  -2   2  194.08   12.30
  -7  -2   2  183.78   12.60
  -7   2   2  179.58   12.80
  -7   2   2  150.88   15.00
   7   2  -2  176.38   12.40
  -7   2   2  173.68   14.00
  -7   2   2  168.48   12.70
   7   2  -2  175.08   13.70
   7   2  -2  182.38   12.80
   7   2  -2  184.68   12.80
  -6  -2   2   75.69    7.10
   6  -2  -2   62.59    7.60
   6  -2  -2   85.29    9.00
   6  -2  -2   80.59    9.50
   6  -2  -2   65.89    7.70
  -6  -2   2   66.99    6.00
  -6  -2   2   65.19    6.20
  -6  -2   2   80.19    6.20
   6   2  -2   68.09    6.80
  -6   2   2   88.09    9.00
   6   2  -2   85.39    7.90
   6   2  -2   78.59    6.90
  -6   2   2   58.19    7.30
  -6   2   2   85.99    8.60
   6   2  -2   73.29    6.40
   6   2  -2   85.59    6.10
  -6   2   2   62.99    7.20
   4  -2  -2  428.96   26.40
  -4  -2   2  379.16   26.40
   4  -2  -2  459.95   27.20
  -4  -2   2  391.66   25.90
   4  -2  -2  391.56   27.20
  -4  -2   2  387.16   25.90
  -4  -2   2  377.86   25.90
   4  -2  -2  409.56   26.40
   4   2  -2  421.16   26.10
   4   2  -2  420.36   26.00
   4   2  -2  404.26   26.10
  -4   2   2  423.26   26.40
   4   2  -2  404.66   26.60
  -4   2   2  388.76   26.80
  -4   2   2  388.06   26.60
  -4   2   2  366.26   26.90
   4   2  -2  412.26   26.10
  -3  -2   2  868.71   56.69
   3  -2  -2  905.71   57.69
  -3  -2   2  766.12   56.89
   3  -2  -2  903.11   56.99
   3  -2  -2  989.50   57.69
  -3  -2   2  870.21   56.69
  -3  -2   2  880.11   57.19
  -3   2   2  896.51   57.59
  -3   2   2  854.21   57.19
   3   2  -2  949.90   56.89
   3   2  -2  913.11   56.79
  -3   2   2  893.61   57.49
   3   2  -2  890.91   56.79
   3   2  -2  933.21   57.39
  -2  -2   2  797.92   53.09
   2  -2  -2  836.02   53.29
  -2  -2   2  808.52   53.19
   2  -2  -2  867.71   53.89
  -2  -2   2  853.31   53.49
   2  -2  -2  815.32   54.09
   2   2  -2  885.21   53.19
  -2   2   2  829.52   53.99
   2   2  -2  830.92   53.89
  -1  -2   2 3001.50  186.68
  -1  -2   2 3081.49  186.98
   1  -2  -2 2855.81  186.88
   1  -2  -2 2810.72  187.58
  -1   2   2 2731.83  187.68
   1   2  -2 3227.18  186.98
   0  -2  -2 8021.80  507.15
   1  -2   2 2149.69  137.49
  -1  -2  -2 2125.89  137.49
  -1  -2  -2 2045.30  137.39
   1  -2   2 2301.17  137.99
   1  -2   2 2508.85  137.79
  -1  -2  -2 2075.69  137.29
  -1  -2  -2 2092.09  137.39
   1   2   2 2013.20  138.29
   1   2   2 2173.88  137.39
  -1   2  -2 2337.57  137.49
   1   2   2 2050.89  137.39
   1   2   2 2183.18  137.49
   2  -2   2    2.90    3.70
   2  -2   2    1.80    2.70
  -2  -2  -2   -2.20    1.30
  -2  -2  -2   -1.80    1.30
  -2  -2  -2    0.70    1.40
   2  -2   2    0.40    1.80
   2  -2   2    0.40    2.80
   2   2   2   -2.10    1.40
  -2   2  -2    2.70    3.70
   2   2   2    1.30    1.50
   2   2   2    3.50    1.50
  -2   2  -2    2.30    2.80
  -2   2  -2    1.60    2.20
   2   2   2   -2.40    1.20
   2   2   2   -2.10    1.20
   2   2   2    1.20    1.90
  -3  -2  -2   33.50    3.40
  -3  -2  -2   23.20    3.00
  -3  -2  -2   35.50    3.50
  -3  -2  -2   34.50    2.90
   3   2   2   25.40    3.20
  -3   2  -2   36.50    3.90
   3   2   2   34.70    4.20
   3   2   2   30.10    3.10
   3   2   2   35.90    3.20
   3   2   2   22.80    3.10
  -4  -2  -2    1.40    1.60
  -4  -2  -2   -0.30    1.70
   4   2   2    0.90    1.50
   4   2   2   -1.30    2.40
   5  -2   2 2294.87  143.99
  -5  -2  -2 2240.18  144.19
   5  -2   2 2514.85  144.99
   5  -2   2 2344.37  144.39
  -5  -2  -2 2180.78  143.89
  -5  -2  -2 2217.88  143.89
   5  -2   2 2323.47  144.49
  -5  -2  -2 2293.77  144.09
   5   2   2 2256.87  143.99
  -5   2  -2 2154.88  144.19
   5   2   2 2154.48  144.29
   5   2   2 2404.36  143.99
   5   2   2 2293.67  144.29
   5   2   2 2285.07  143.99
  -5   2  -2 2171.88  144.49
  -5   2  -2 2222.78  143.79
   6  -2   2 1371.76   88.69
  -6  -2  -2 1411.46   87.99
   6  -2   2 1276.97   88.19
  -6  -2  -2 1507.25   88.09
  -6  -2  -2 1430.36   88.29
  -6  -2  -2 1352.16   88.19
   6  -2   2 1396.16   89.29
   6   2   2 1428.06   88.19
   6   2   2 1288.37   88.49
  -6   2  -2 1310.37   87.89
   6   2   2 1466.25   87.99
  -6   2  -2 1316.47   88.39
   6   2   2 1407.56   88.29
   6   2   2 1421.06   88.19
  -7  -2  -2   -3.40    2.10
  -7  -2  -2    0.00    2.60
   7  -2   2    7.00    4.10
   7  -2   2    3.30    4.10
   7  -2   2   -2.10    7.20
  -7  -2  -2    3.20    2.70
   7   2   2   -4.20    2.80
  -7   2  -2    1.40    2.50
   7   2   2   -0.60    3.30
   7   2   2    2.80    3.50
   7   2   2    3.70    2.20
  -7   2  -2   -0.50    4.90
  -7   2  -2    3.70    4.80
  -7   2  -2   -0.90    2.60
   7   2   2    2.80    3.00
  -8  -2  -2  202.18   14.60
   8  -2   2  216.58   16.20
   8  -2   2  166.58   15.80
   8  -2   2  181.78   19.30
   8  -2   2  178.48   15.70
  -8  -2  -2  207.88   14.00
  -8  -2  -2  200.28   14.00
  -8   2  -2  221.68   18.70
  -8   2  -2  201.08   14.10
   8   2   2  187.48   15.40
   8   2   2  212.08   14.80
   8   2   2  207.88   13.90
   8   2   2  210.98   14.80
  -8   2  -2  243.48   16.10
  -8   2  -2  164.68   14.20
   8   2   2  218.08   15.20
  -9  -2  -2   22.60    3.90
   9  -2   2   26.80    6.90
  -9  -2  -2   25.80    4.30
  -9  -2  -2   26.20    4.90
   9  -2   2   30.30    7.00
   9  -2   2   34.30    6.80
   9   2   2   26.50    5.80
  -9   2  -2   30.50    7.80
   9   2   2   37.40    4.60
  -9   2  -2   27.70    4.50
   9   2   2   25.70    4.90
  -9   2  -2   32.90    4.60
 -10  -2  -2  559.74   34.70
  10  -2   2  472.65   35.90
 -10  -2  -2  553.14   34.10
 -10  -2  -2  537.45   34.10
 -10   2  -2  537.15   36.30
 -10   2  -2  437.56   34.20
  10   2   2  548.55   34.80
 -10   2  -2  456.55   34.10
  10   2   2  551.34   33.90
  11  -2   2   60.09   11.20
  11  -2   2   70.99   12.60
  11  -2   2   97.19   15.20
 -11  -2  -2   85.29    8.10
 -11  -2  -2   77.19    8.50
  11   2   2   84.19   10.20
 -11   2  -2  101.89   13.30
  11   2   2   65.89    8.00
 -11   2  -2   92.59    9.20
  12  -2   2   18.60    8.10
 -12  -2  -2   20.40    5.20
 -12  -2  -2   19.40    5.40
 -12  -2  -2   12.90    4.50
  12   2   2   22.20    4.80
 -12   2  -2   31.50   10.70
  12   2   2   22.20    6.50
  13  -2   2    8.80    8.60
 -13  -2  -2   -6.60    4.60
 -13  -2  -2   -3.90    5.90
 -13   2  -2    8.00    9.70
  13   2   2   10.80    6.60
  13   2   2    5.60    4.90
 -13   2  -2    2.10    5.40
 -14  -2  -2    9.50    7.50
 -14  -2  -2   20.00    6.50
  14  -2   2   -0.30    8.80
 -14  -2  -2    0.70    5.60
  14   2   2    9.90    5.90
 -14   2  -2    2.00    6.00
  14   2   2   13.00    7.70
 -15  -2  -2   -1.50    7.20
 -15  -2  -2   -3.10    6.40
 -15  -2  -2   15.90    7.80
  15  -2   2   12.20    9.90
  15   2   2    3.40    6.90
  15   2   2    3.10    8.90
 -15   2  -2    9.90    7.60
 -15  -3   2   16.90    7.40
 -15  -3   2    1.90    6.90
 -15  -3   2  -11.80    8.60
  15   3  -2   12.50    6.60
  15   3  -2    0.30    9.10
 -14  -3   2    1.80    7.80
 -14  -3   2   13.30    6.30
  14  -3  -2  -15.50   12.20
 -14  -3   2    5.60    5.30
  14   3  -2   17.60    6.20
  14   3  -2   -0.50    8.10
 -13  -3   2   23.30    5.90
 -13  -3   2   26.30    5.50
 -13  -3   2   18.00    7.60
  13  -3  -2   26.20   13.70
  13   3  -2   28.40    6.20
  13   3  -2   24.80    7.80
 -13   3   2   24.70    7.70
  12  -3  -2  -13.10   11.20
 -12  -3   2    7.60    4.60
 -12  -3   2   -7.20    5.90
 -12  -3   2    4.10    4.20
  12   3  -2    8.80    6.20
  12   3  -2    9.70    4.60
 -12   3   2    5.80    6.80
  11  -3  -2    1.40   11.50
 -11  -3   2   -3.70    3.40
 -11  -3   2    3.60    5.10
  11  -3  -2   -2.30    9.50
 -11   3   2  -11.40    5.80
  11   3  -2    6.40    4.20
 -11   3   2    0.20    6.00
  11   3  -2    6.90    5.40
 -10  -3   2  322.97   21.30
  10  -3  -2  255.37   25.10
 -10  -3   2  318.07   20.40
  10  -3  -2  261.47   24.70
 -10   3   2  315.47   22.20
  10   3  -2  297.17   21.40
  10   3  -2  287.77   20.30
 -10   3   2  264.87   21.90
  -9  -3   2  903.61   56.19
  -9  -3   2  918.51   56.79
   9  -3  -2  924.81   58.79
   9  -3  -2  798.82   57.79
   9  -3  -2  722.23   58.79
  -9  -3   2  869.01   56.09
  -9   3   2  905.31   57.09
   9   3  -2  837.72   56.79
  -9   3   2  952.00   59.39
   9   3  -2  838.22   56.19
  -9   3   2  916.51   56.79
  -8  -3   2  295.67   18.40
   8  -3  -2  262.27   22.20
  -8  -3   2  301.37   19.40
   8  -3  -2  231.28   20.50
   8  -3  -2  235.78   20.70
  -8  -3   2  279.37   18.40
  -8   3   2  284.27   22.00
   8   3  -2  270.67   19.30
  -8   3   2  274.57   19.40
   8   3  -2  281.17   18.50
  -8   3   2  256.67   19.40
  -7  -3   2   -3.10    3.50
  -7  -3   2   -0.70    2.50
   7  -3  -2    7.40    8.60
   7  -3  -2   -4.40    5.00
  -7  -3   2   -0.30    2.20
   7  -3  -2   -1.10    6.20
  -7  -3   2    0.00    2.00
  -7   3   2    3.10    5.90
   7   3  -2    9.10    3.70
   7   3  -2   -3.10    3.90
   7   3  -2   -1.80    2.40
   7   3  -2   -0.50    3.40
  -7   3   2   -2.30    6.00
  -7   3   2   -3.90    3.90
   7   3  -2   -4.60    3.30
  -7   3   2    0.80    5.10
   6  -3  -2   85.19   11.00
  -6  -3   2   56.59    5.90
   6  -3  -2   64.79    8.50
  -6  -3   2   61.29    5.70
  -6  -3   2   89.59    7.60
  -6  -3   2   63.79    5.80
   6  -3  -2   82.19   10.70
  -6   3   2   70.29   10.90
   6   3  -2   71.29    6.70
   6   3  -2   68.39    6.90
   6   3  -2   77.09    6.10
  -5  -3   2  419.16   26.60
  -5  -3   2  412.96   27.40
   5  -3  -2  391.66   28.60
  -5  -3   2  403.96   26.60
  -5  -3   2  387.26   26.70
   5  -3  -2  415.06   29.10
   5   3  -2  419.86   26.90
  -5   3   2  368.56   28.30
  -5   3   2  407.76   28.30
   5   3  -2  426.86   27.70
  -5   3   2  446.16   28.00
   5   3  -2  440.96   27.00
   5   3  -2  413.56   26.80
   4  -3  -2   13.20    5.70
  -4  -3   2    3.60    3.00
  -4  -3   2    5.90    1.80
   4  -3  -2   12.90    4.80
  -4  -3   2   -1.10    1.80
   4   3  -2    7.20    2.20
   4   3  -2    4.60    2.60
  -4   3   2   16.60    5.00
  -4   3   2    2.90    4.20
   4   3  -2    4.00    3.20
   4   3  -2    3.30    2.60
  -3  -3   2   71.39    6.30
   3  -3  -2   58.89    8.30
  -3  -3   2   66.49    4.90
   3  -3  -2   72.39    5.90
  -3  -3   2   59.49    5.30
   3  -3  -2   55.29    7.80
  -3  -3   2   68.09    5.10
   3   3  -2   65.89    5.50
  -3   3   2   74.09    7.20
   3   3  -2   68.39    6.70
  -3   3   2   61.19    7.80
  -2  -3   2   70.39    6.70
  -2  -3   2   75.69    5.60
  -2   3   2   67.09    8.80
   2   3  -2   86.39    7.00
   2   3  -2   76.39    6.00
  -1  -3   2   -2.30    2.40
   1   3  -2    3.20    2.70
   0  -3  -2    4.90    4.10
   0  -3   2    0.90    2.40
   0  -3   2    3.40    1.80
   1  -3   2   61.99    6.00
  -1  -3  -2   78.99    5.80
  -1  -3  -2   77.29    5.70
   1  -3   2   75.39    8.00
  -1  -3  -2   68.19    5.70
   1  -3   2   82.59    8.00
  -1   3  -2   69.39    7.40
   1   3   2   74.59    5.30
   1   3   2   81.09    6.00
  -1   3  -2   66.09    6.00
   1   3   2   77.89    6.30
   1   3   2   77.19    7.80
  -2  -3  -2  377.66   24.20
  -2  -3  -2  373.76   24.00
   2  -3   2  378.36   24.90
   2  -3   2  394.66   24.70
   2  -3   2  390.96   24.30
   2  -3   2  383.36   25.40
  -2  -3  -2  362.26   24.10
  -2   3  -2  388.96   25.10
   2   3   2  371.66   24.00
   2   3   2  354.86   23.90
   2   3   2  356.56   25.00
  -2   3  -2  347.57   24.20
   2   3   2  349.77   23.90
   2   3   2  386.06   24.50
   2   3   2  369.06   24.30
  -3  -3  -2   57.79    5.40
  -3  -3  -2   48.40    5.00
  -3  -3  -2   64.69    4.80
   3   3   2   53.29    5.10
   3   3   2   63.09    5.20
   3   3   2   51.19    4.80
   3   3   2   76.29    7.20
   3   3   2   61.89    5.30
  -4  -3  -2    0.20    1.80
   4  -3   2   10.80    4.40
  -4  -3  -2    1.20    2.00
   4  -3   2    4.50    4.40
   4  -3   2    1.80    5.70
   4  -3   2    1.10    2.70
  -4  -3  -2   -2.80    1.90
  -4  -3  -2   -1.80    1.80
   4   3   2   -1.60    2.00
   4   3   2   -0.80    2.80
  -4   3  -2   10.40    4.40
   4   3   2   -3.10    2.00
   4   3   2   -3.80    1.80
  -5  -3  -2  100.59    7.80
  -5  -3  -2  106.79    8.50
   5  -3   2  130.99   11.60
   5  -3   2  132.19   10.10
  -5  -3  -2   99.79    8.20
  -5  -3  -2  104.19    7.90
   5   3   2   99.19    8.00
   5   3   2  104.29    9.30
   5   3   2   99.09    8.00
   5   3   2  112.39    8.20
   5   3   2  105.79    8.00
  -6  -3  -2   48.80    5.60
  -6  -3  -2   50.19    5.00
  -6  -3  -2   51.39    5.00
  -6  -3  -2   52.59    5.30
   6   3   2   36.50    5.70
   6   3   2   47.90    5.60
   6   3   2   53.49    5.30
   6   3   2   60.09    5.60
   6   3   2   44.70    5.30
   7  -3   2  445.06   30.90
  -7  -3  -2  472.15   29.30
  -7  -3  -2  432.36   28.80
  -7  -3  -2  434.86   28.80
   7   3   2  427.16   28.90
   7   3   2  449.76   29.10
  -7   3  -2  425.46   30.10
   8  -3   2  428.16   31.30
  -8  -3  -2  454.35   28.90
  -8  -3  -2  437.06   28.90
  -8  -3  -2  491.85   29.60
  -8   3  -2  421.96   29.10
  -8   3  -2  447.66   31.20
   8   3   2  419.16   29.80
   8   3   2  423.16   29.00
  -9  -3  -2  154.88   11.70
   9  -3   2  155.68   16.50
  -9  -3  -2  151.68   11.70
  -9  -3  -2  170.08   13.00
  -9   3  -2  157.68   12.30
   9   3   2  139.69   13.50
  -9   3  -2  159.38   15.80
   9   3   2  139.69   11.80
 -10  -3  -2   13.10    3.80
 -10  -3  -2   14.00    3.90
  10  -3   2   13.40    8.70
  10  -3   2   14.20    9.40
 -10  -3  -2    5.50    5.40
  10   3   2    8.10    4.20
  10   3   2   13.30    5.40
 -10   3  -2   19.40    4.60
 -10   3  -2   14.20    4.90
 -11  -3  -2   31.50    5.00
  11  -3   2   47.70   10.50
 -11  -3  -2   30.20    6.10
 -11  -3  -2   36.80    6.30
 -11   3  -2   42.40   11.00
 -11   3  -2   28.90    5.50
  11   3   2   28.70    6.90
  11   3   2   28.10    5.30
 -12  -3  -2   11.90    4.60
 -12  -3  -2    0.00    5.60
 -12  -3  -2    6.30    4.40
  12  -3   2   -3.00    9.60
 -12   3  -2    4.50    5.40
  12   3   2   12.80    4.70
  12   3   2    8.10    6.50
 -13  -3  -2    9.70    4.90
 -13  -3  -2   -4.30    5.20
  13  -3   2   -6.80   10.30
 -13  -3  -2    4.30    6.50
  13   3   2    0.60    7.30
 -13   3  -2    8.20    6.10
  13   3   2    0.60    5.50
  14  -3   2   10.90   12.70
 -14  -3  -2  -14.90    6.90
 -14  -3  -2    2.00    5.50
 -14  -3  -2   -8.30    6.50
  14   3   2    1.40    6.30
  14   3   2    5.30    8.40
 -14  -4   2    7.90    9.60
 -14  -4   2   12.30    6.10
 -14  -4   2    6.90    6.40
  14  -4  -2    6.00   16.60
  14   4  -2   10.90    6.20
 -13  -4   2   19.00    8.00
  13  -4  -2    5.20   15.40
 -13  -4   2   30.50    5.90
 -13  -4   2   17.80    5.20
  13   4  -2   32.60    6.50
 -12  -4   2    9.00    6.50
 -12  -4   2   11.00    4.80
  12  -4  -2   -8.80   13.80
 -12  -4   2   17.50    4.70
  12   4  -2   15.40    5.30
 -12   4   2    5.50    7.90
 -12   4   2    0.60   16.00
 -11  -4   2   58.39   10.00
 -11  -4   2   56.89    7.20
  11  -4  -2   40.50   14.20
 -11  -4   2   48.90    6.30
  11   4  -2   52.69    8.00
 -11   4   2   61.79    9.00
 -10  -4   2   52.89    7.50
  10  -4  -2   67.89   12.30
  10  -4  -2   66.49   13.80
 -10  -4   2   65.79    9.50
 -10  -4   2   65.69    7.40
 -10   4   2   53.59   14.50
 -10   4   2   80.99    9.70
  10   4  -2   81.49    8.00
  -9  -4   2  128.69   13.60
  -9   4   2  127.39   13.50
  -9   4   2  130.49   17.20
  -8  -4   2  329.77   20.40
   8  -4  -2  238.98   26.00
  -8  -4   2  328.57   21.70
  -8  -4   2  315.37   20.30
   8   4  -2  296.27   20.90
  -8   4   2  272.67   24.40
  -7  -4   2  102.29    7.80
   7  -4  -2   71.49   11.70
  -7  -4   2  109.79    7.90
  -7  -4   2   90.99    9.70
   7   4  -2  109.49    8.70
  -7   4   2   70.09   13.00
  -6  -4   2  261.47   17.40
  -6  -4   2  242.48   15.90
  -6  -4   2  244.98   16.00
   6  -4  -2  223.98   21.20
  -6  -4   2  213.38   16.00
  -6   4   2  223.28   19.30
   6   4  -2  251.67   16.60
  -6   4   2  229.58   19.30
  -5  -4   2  170.18   12.30
   5  -4  -2  176.08   15.50
  -5  -4   2  140.49   10.70
   5   4  -2  160.28   11.50
   5   4  -2  120.89   12.70
  -4  -4   2   68.49    5.90
  -4  -4   2   71.89    5.80
  -4  -4   2   77.29    7.90
   4   4  -2   54.39    8.20
  -3  -4   2   89.19    7.80
   3   4  -2   55.39    8.20
   2  -4  -2   72.89   10.30
  -2  -4   2   67.19    5.70
  -2  -4   2   61.19    7.20
   2   4  -2   73.99    6.60
   2   4  -2   69.49    7.80
   1  -4  -2 1650.93  111.49
   1  -4  -2 1655.53  112.39
  -1  -4   2 1787.22  111.59
  -1  -4   2 1826.72  111.39
  -1   4   2 1646.84  111.49
  -1   4   2 1797.42  112.69
   1   4  -2 1899.51  111.59
   0  -4  -2   41.40    8.00
   1  -4   2  464.25   28.30
   1  -4   2  423.26   28.10
   1  -4   2  358.66   26.50
  -1  -4  -2  384.16   26.50
  -1  -4  -2  383.96   26.40
   1   4   2  397.76   26.70
   1   4   2  383.46   26.90
   1   4   2  431.56   28.30
  -1   4  -2  395.66   26.70
  -1   4  -2  440.26   27.90
  -2  -4  -2  102.09    8.70
  -2  -4  -2  117.19    8.70
  -2  -4  -2  129.49    8.70
   2   4   2  113.09    9.70
   2   4   2  114.89   11.60
   2   4   2  126.39    9.10
   3  -4   2  546.25   33.90
   3  -4   2  469.05   31.80
  -3  -4  -2  452.15   31.40
   3  -4   2  471.05   33.40
  -3  -4  -2  500.55   31.50
  -3  -4  -2  479.75   31.70
   3   4   2  486.05   33.00
   3   4   2  482.35   31.30
   3   4   2  477.25   32.20
   3   4   2  494.85   31.80
   3   4   2  489.65   31.40
  -3   4  -2  500.75   33.20
   3   4   2  469.25   31.20
   4  -4   2   54.29   10.00
  -4  -4  -2   30.80    4.40
  -4  -4  -2   33.10    4.50
  -4  -4  -2   27.90    3.90
  -4  -4  -2   28.50    4.90
  -4  -4  -2   29.20    5.00
   4   4   2   31.50    4.30
   4   4   2   36.70    6.90
   4   4   2   28.40    4.00
   4   4   2   28.60    4.50
   4   4   2   32.60    5.00
   4   4   2   42.80    4.70
  -5  -4  -2   42.60    5.50
  -5  -4  -2   43.10    6.10
  -5  -4  -2   60.39    6.00
  -5  -4  -2   61.29    5.70
   5   4   2   53.59    6.10
   5   4   2   46.30    5.60
   5   4   2   52.89    8.30
   5   4   2   48.90    5.40
  -6  -4  -2   11.90    2.90
   6  -4   2   20.00    4.60
  -6  -4  -2    9.10    3.50
   6   4   2    8.70    2.90
   6   4   2    8.40    3.50
  -6   4  -2    5.70    6.70
  -7  -4  -2  118.69    8.50
   7  -4   2   91.69   14.60
  -7  -4  -2  115.19    8.70
  -7  -4  -2   94.79    9.30
   7   4   2   91.89    9.10
   7   4   2  109.89    8.60
  -7   4  -2   77.39   12.10
  -8  -4  -2  177.68   13.70
  -8  -4  -2  168.28   12.60
  -8  -4  -2  173.38   12.70
   8   4   2  164.68   13.20
   8   4   2  167.38   12.60
  -9  -4  -2   67.29    7.10
  -9  -4  -2   66.89    9.90
  -9  -4  -2   51.59    8.80
   9   4   2   50.79    6.60
   9   4   2   42.00    6.50
 -10  -4  -2  401.26   27.70
 -10  -4  -2  428.46   28.90
 -10  -4  -2  421.36   28.00
  10  -4   2  405.26   33.20
  10   4   2  372.16   27.70
 -10   4  -2  483.25   31.40
  10   4   2  398.96   28.20
 -11  -4  -2    1.30    4.30
 -11  -4  -2    0.10    5.80
 -11  -4  -2    5.10    4.60
  11  -4   2  -14.70   12.60
  11   4   2    1.30    4.80
 -11   4  -2   11.00    9.70
 -11   4  -2   12.20    4.90
  11   4   2   -0.80    4.60
 -12  -4  -2   -2.10    5.00
  12  -4   2   20.60   12.70
 -12  -4  -2    4.30    5.20
 -12  -4  -2    2.10    6.40
  12   4   2   16.80    5.90
 -13  -4  -2   13.70    7.30
  13  -4   2    4.90   15.40
 -13  -4  -2    6.30    5.50
 -13  -4  -2   22.00    6.30
  13   4   2    6.50    6.20
 -13  -5   2    6.60    5.30
  13  -5  -2   -7.80   21.10
 -13  -5   2   -3.00    8.60
 -13  -5   2   -4.00    5.60
  13   5  -2    0.20    6.40
 -12  -5   2    7.50    5.00
  12  -5  -2   -6.70   18.30
 -12  -5   2  -10.50    6.60
 -12  -5   2   -0.70    4.90
  12   5  -2    5.00    6.00
 -12   5   2  -10.50   16.90
 -11  -5   2   -0.10    4.50
 -11  -5   2   -0.20    5.70
 -11  -5   2    5.40    4.50
  11  -5  -2   17.80   17.20
  11   5  -2   13.30    5.90
 -10  -5   2   55.29    8.10
 -10  -5   2   62.69    7.00
 -10  -5   2   55.49    6.50
  10  -5  -2   52.89   16.40
 -10   5   2   58.99   15.20
  10   5  -2   63.69    8.90
  -9  -5   2   44.30    6.90
  -9  -5   2   50.79    6.40
   9  -5  -2   42.40   13.70
  -9  -5   2   51.99    9.30
  -9   5   2   66.49   12.80
   9   5  -2   55.49    8.00
  -8  -5   2   75.59    6.70
  -8  -5   2   61.79    9.00
   8  -5  -2   66.99   14.10
  -8  -5   2   69.39    7.10
   8   5  -2   62.29    8.30
   7  -5  -2  156.58   22.60
  -7  -5   2  165.78   11.40
  -7  -5   2  164.18   15.90
   7   5  -2  114.89   14.90
  -7   5   2  125.49   22.30
  -6  -5   2  126.59    9.50
   6   5  -2  124.59   10.80
   5  -5  -2   41.10   10.80
  -5  -5   2   48.40    8.00
  -5   5   2   37.10   10.20
   5   5  -2   51.89    6.70
  -4  -5   2  415.46   27.70
   4  -5  -2  390.46   32.80
  -4  -5   2  400.96   28.50
   4   5  -2  462.65   28.30
  -3  -5   2   90.39    9.90
   3  -5  -2  106.19   16.00
  -3   5   2  113.29   13.20
   3   5  -2   74.09   10.60
   3   5  -2  100.39    8.80
  -2  -5   2   19.80    4.60
   2  -5  -2   20.90    8.50
   2   5  -2   14.80    5.00
  -2   5   2   12.00    8.10
   2   5  -2   25.00    4.30
  -1  -5   2   21.40    4.90
   1   5  -2   10.30    7.40
   1   5  -2   29.50    4.30
   0  -5  -2  250.57   21.20
   0  -5   2  245.08   18.70
   0   5   2  277.87   19.20
   0   5  -2  281.27   19.10
   0   5   2  308.07   22.00
   0   5  -2  301.47   21.40
   1  -5   2   -1.30    7.20
  -1  -5  -2   -0.60    2.50
   1  -5   2   -2.70    7.40
   1  -5   2    0.20    3.40
   1   5   2    5.30    3.40
  -1   5  -2   -5.40    3.80
   1   5   2   -2.90    3.70
   1   5   2    6.20    7.50
  -1   5  -2   -3.00    6.60
   2  -5   2   -1.80    3.70
   2  -5   2    6.20    7.30
  -2  -5  -2    6.70    2.90
   2  -5   2    8.10    8.00
  -2   5  -2    1.30    6.80
   2   5   2   -2.60    7.30
   2   5   2    0.90    3.50
   2   5   2    1.80    4.20
  -3  -5  -2  176.18   13.50
   3   5   2  174.58   15.10
   3   5   2  186.48   13.70
   3   5   2  213.38   16.90
   4  -5   2   43.60   10.00
  -4  -5  -2   34.20    6.30
  -4  -5  -2   57.69    5.90
   4   5   2   48.00    9.30
  -4   5  -2   36.10    9.50
   4   5   2   53.79    5.80
  -4   5  -2   30.30    7.50
   4   5   2   48.70    6.60
  -5  -5  -2    8.30    3.70
  -5  -5  -2   17.50    3.60
   5   5   2   10.50    3.20
   5   5   2   13.70    4.40
   5   5   2    5.00    6.70
  -6  -5  -2   11.40    4.00
  -6  -5  -2    9.70    4.10
   6  -5   2   13.00    9.80
  -6  -5  -2   11.90    4.50
   6   5   2   11.40    3.50
   6   5   2   13.70    4.70
  -6   5  -2    6.30    7.90
   6   5   2   15.70    3.90
   7  -5   2   41.00   12.40
  -7  -5  -2   26.90    8.40
  -7  -5  -2   50.29    6.60
  -7   5  -2   43.00   10.70
   7   5   2   49.20    6.80
   7   5   2   44.70    6.30
   7   5   2   42.60    6.60
  -8  -5  -2   -6.10    4.30
  -8  -5  -2    2.40    4.00
  -8  -5  -2    1.90    4.00
   8   5   2    4.80    3.90
   8   5   2   -5.50    4.50
  -9  -5  -2  310.07   22.40
  -9  -5  -2  311.27   21.10
  -9  -5  -2  320.97   21.40
   9  -5   2  309.17   32.20
  -9   5  -2  274.07   25.50
   9   5   2  291.87   21.00
   9   5   2  279.17   21.70
 -10  -5  -2  107.19   11.20
 -10  -5  -2  112.59   11.40
  10  -5   2   92.29   18.50
 -10  -5  -2  116.39   12.40
  10   5   2  116.69   11.90
 -10   5  -2  132.99   18.40
  11  -5   2  -10.50   13.50
 -11  -5  -2    4.50    5.40
 -11  -5  -2    4.40    6.30
 -11  -5  -2    1.30    5.40
  11   5   2    7.10    6.00
 -12  -5  -2    9.00    7.10
 -12  -5  -2   -3.50    6.10
 -12  -5  -2    8.10    6.00
  12  -5   2  -11.20   18.90
  12   5   2   18.60    7.20
  11  -6  -2  -25.30   21.20
 -11  -6   2   10.50    5.30
 -11  -6   2    9.50    5.90
 -11  -6   2   -6.90    6.50
  11   6  -2   12.70    6.40
 -10  -6   2  -10.50    5.90
 -10  -6   2   10.40    5.50
  10  -6  -2  -17.50   18.10
 -10  -6   2   -6.50    4.50
  10   6  -2   -0.50    5.60
   9  -6  -2   26.80   18.10
  -9  -6   2   46.50    7.90
  -9  -6   2   59.39    7.30
  -9  -6   2   50.79    6.30
   9   6  -2   59.69    8.10
  -8  -6   2   33.80    5.00
   8  -6  -2   31.50   16.30
  -8  -6   2   29.70    6.90
   8   6  -2   35.30    6.80
   7  -6  -2  125.99   19.70
  -7  -6   2  177.88   12.30
  -7  -6   2  159.78   13.90
   7   6  -2  165.18   13.60
  -7   6   2  105.89   21.50
   6  -6  -2  143.19   25.20
  -6  -6   2  130.69   12.90
  -6   6   2  133.09   19.00
   6   6  -2  129.89   12.10
  -5  -6   2   75.19   10.70
   5   6  -2   52.59    8.60
  -5   6   2   84.79   16.20
  -4  -6   2   34.00    6.30
   4  -6  -2   39.50   12.20
   3  -6  -2   63.19   13.00
  -3  -6   2   59.59    9.50
  -3   6   2   59.39   12.70
   3   6  -2   61.79    7.40
   2  -6  -2    4.10   11.10
  -2  -6   2   -1.90    5.00
   2   6  -2    3.30    4.30
  -1  -6   2    0.00    5.00
   1   6  -2    4.00    4.30
  -1   6   2    6.90   10.10
   0   6   2  260.67   19.50
   0   6   2  243.08   22.80
   0   6  -2  264.47   19.50
   0   6  -2  293.97   23.10
  -1   6  -2   22.20    9.90
   1   6   2   14.30    9.70
   1   6   2    7.40    5.00
  -2  -6  -2  206.58   16.00
  -2   6  -2  233.08   21.30
   2   6   2  211.68   16.30
   2   6   2  238.58   20.50
  -3  -6  -2   -5.20    3.70
   3  -6   2    7.00   11.40
  -3   6  -2    7.20    9.90
   3   6   2    2.30    4.40
   3   6   2   -6.50    9.40
  -4  -6  -2   27.40    5.30
   4  -6   2   42.60   13.30
   4   6   2   32.00   11.10
  -4   6  -2   43.60   11.00
  -5  -6  -2  112.29   10.30
   5  -6   2  139.49   22.80
   5   6   2  111.49   11.00
  -6  -6  -2   -4.70    4.60
   6   6   2   -6.80    4.00
  -6   6  -2   -9.60   11.10
   6   6   2   -0.20    4.70
  -7  -6  -2    1.90    4.90
  -7  -6  -2    5.80    5.30
   7   6   2   -3.40    5.30
   7   6   2   10.10    4.50
  -8  -6  -2   29.60    6.80
   8  -6   2   32.90   15.50
  -8  -6  -2   31.80    6.40
  -8  -6  -2   27.30    5.80
  -8   6  -2   32.10   12.40
   8   6   2   24.80    6.90
   8   6   2   24.80    5.60
  -9  -6  -2  170.58   14.60
  -9  -6  -2  151.68   14.80
  -9  -6  -2  158.88   13.90
   9  -6   2  139.09   22.20
   9   6   2  144.49   14.50
   9   6   2  175.78   14.10
  -9   6  -2  152.68   22.80
  10  -6   2   -0.90   20.10
 -10  -6  -2  -12.70    6.30
 -10  -6  -2   13.10    6.40
 -10  -6  -2    5.00    6.50
  10   6   2    4.80    6.50
  10   6   2    8.30    6.20
  11  -6   2   15.70   22.00
 -11  -6  -2   17.00    7.70
 -11  -6  -2   12.80    7.10
 -11  -6  -2   23.10    7.80
  11   6   2   39.70    7.80
  11   6   2   36.60   12.40
  10  -7  -2  -11.70   24.90
 -10  -7   2   -7.20    7.80
  10   7  -2    2.20    7.10
  -9  -7   2   -8.20    6.70
  -9  -7   2    9.20    5.60
   9  -7  -2  -27.40   21.60
   9   7  -2   10.50    6.60
  -8  -7   2   24.50    7.20
   8  -7  -2   19.40   20.10
   8   7  -2   17.80    6.70
   7  -7  -2   16.80   19.20
  -7  -7   2   18.20    6.80
   7   7  -2   14.90    6.30
  -7   7   2   20.20   17.80
  -6  -7   2  242.18   18.90
   6  -7  -2  240.48   34.50
  -6   7   2  179.08   25.50
   6   7  -2  219.78   18.00
  -5  -7   2   41.00    7.60
   5  -7  -2   43.10   17.50
  -5   7   2   56.49   16.80
   5   7  -2   37.40    7.20
   4  -7  -2   16.00   15.20
  -4  -7   2    2.30    5.80
   4   7  -2    4.90    5.30
  -4   7   2    8.30   13.00
   3  -7  -2   61.79   16.90
   3   7  -2   67.29    8.60
  -3   7   2   67.29   15.70
  -2  -7   2   23.10    6.60
   2  -7  -2   25.20   16.10
   2   7  -2   37.40    6.80
  -2   7   2   27.80   13.70
   1  -7  -2  225.48   29.00
   1   7  -2  228.58   18.40
   0  -7   2  157.78   25.30
   0   7  -2  200.28   16.60
   0   7   2  175.78   21.60
   0   7   2  155.18   15.80
  -1  -7  -2   10.00    4.80
   1  -7   2   -7.80   15.80
   1   7   2   12.90   12.30
  -1   7  -2   13.40   11.90
   1   7   2   29.90    7.50
  -2  -7  -2   -3.90    4.60
   2  -7   2   -3.80   14.50
   2   7   2    1.10    6.00
   2   7   2   -1.70   11.70
  -2   7  -2   12.50   12.70
  -3  -7  -2   26.80    6.00
   3   7   2   40.50   13.00
  -3   7  -2   31.50   14.50
   3   7   2   36.50    7.00
  -4  -7  -2  181.78   15.00
   4  -7   2  181.98   29.70
  -4   7  -2  168.38   25.40
   4   7   2  180.38   15.40
  -4   7  -2  174.98   21.60
   4   7   2  193.88   22.00
   5  -7   2   94.19   18.50
  -5  -7  -2   76.89   10.50
   5   7   2   87.29   10.90
  -6  -7  -2   -5.40    5.90
   6  -7   2   16.50   16.80
   6   7   2   -1.20    5.90
  -7  -7  -2    0.30    6.20
   7  -7   2  -16.70   20.40
  -7  -7  -2    3.10    6.50
   7   7   2    4.20    6.50
   8  -7   2    1.60   19.20
  -8  -7  -2   -0.90    6.20
  -8  -7  -2   -4.30    6.40
   8   7   2    6.40    7.00
  -8   7  -2   20.70   14.10
  -9  -7  -2    4.40    6.80
   9  -7   2   13.40   23.30
  -9  -7  -2    2.60    7.20
  -9  -7  -2   23.20    7.80
   9   7   2   12.10    7.50
  -7  -8   2    8.90    7.60
   7  -8  -2  -25.50   23.10
   7   8  -2    8.40    7.50
  -7   8   2  -17.00   22.70
   6  -8  -2   26.10   23.50
  -6  -8   2   30.00    8.40
   6   8  -2   27.00    8.00
  -6   8   2   20.90   20.70
   5  -8  -2    4.20   20.30
  -5  -8   2   11.50    7.50
  -5   8   2   -6.60   19.50
   5   8  -2   10.40    7.30
  -4  -8   2   -1.80    8.20
   4  -8  -2   14.90   18.70
  -4   8   2   -7.10   18.70
   4   8  -2    5.60    7.20
  -3  -8   2    4.60    7.70
   3  -8  -2   31.20   19.00
   3   8  -2   15.00    7.50
  -3   8   2    5.90   17.60
   2  -8  -2   72.09   20.90
  -2  -8   2   55.29    9.30
   2   8  -2   86.19   14.00
  -2   8   2   39.80   18.30
  -1  -8   2   42.40   18.20
   1  -8  -2   12.10   19.80
  -1   8   2   35.10   16.90
   1   8  -2   30.30    9.70
   1   8  -2   10.10   16.90
   0  -8   2   39.00   21.60
   0  -8  -2   63.99   19.10
   0   8  -2   60.29   17.90
   0   8  -2   93.29   12.40
   0   8   2   68.89   18.30
   1  -8   2  125.69   23.00
  -1   8  -2   60.19   18.60
   1   8   2   76.89   12.30
   1   8   2   96.69   19.20
   2  -8   2   85.79   21.50
   2   8   2   76.09   18.50
   2   8   2   79.39   11.90
  -2   8  -2   89.29   20.30
  -3  -8  -2   15.20    6.20
   3  -8   2   31.00   18.50
   3   8   2   30.70    9.40
   3   8   2   20.30   16.40
  -3   8  -2   31.20   23.40
   4  -8   2   -9.40   24.70
  -4  -8  -2   -0.20    6.20
   4   8   2    3.90    7.50
  -4   8  -2   -9.10   19.80
   4   8   2    4.80   16.90
  -5  -8  -2   60.39    8.80
   5  -8   2   52.29   22.70
   5   8   2   68.39    9.90
   6  -8   2   43.80   25.90
   6   8   2   16.40    7.90
  -7  -8  -2   26.20    8.00
   7   8   2    8.30    8.30
   2  -9  -2   -9.60   24.10
  -2  -9   2   27.80   21.20
   2   9  -2    5.80   15.20
  -2   9   2   20.70   23.90
  -1  -9   2   -6.10   27.10
   1  -9  -2   47.90   25.60
   1   9  -2   10.50   25.00
  -1   9   2   -8.20   21.60
   1   9  -2   15.10   12.20
   0  -9   2   -3.20   25.80
   0  -9  -2    6.00   25.00
   0   9  -2   27.90   24.90
   0   9   2    9.10   24.00
  -1  -9  -2    4.60   22.60
   1  -9   2   35.50   28.70
  -1   9  -2   35.90   29.70
   1   9   2  -14.20   21.10
   2  -9   2    5.60   26.60
  15   0  -3   11.20    7.90
 -15   0   3   10.10    7.20
  14   0  -3    7.80    7.40
 -14   0   3    4.70    7.30
 -14   0   3   -3.40    6.30
 -13   0   3   -4.00    5.60
 -13   0   3   -5.40    5.90
  13   0  -3    2.40    6.00
 -12   0   3    1.80    5.10
  12   0  -3    8.00    5.60
  12   0  -3   -4.90   10.10
 -12   0   3   -8.80    5.50
  11   0  -3   -6.70    5.40
  11   0  -3   -3.20    6.60
  11   0  -3   -5.50    7.70
 -11   0   3   -5.20    4.90
 -10   0   3   13.90    4.90
  10   0  -3    3.20    6.00
  10   0  -3    9.50    8.60
 -10   0   3    8.80    5.10
  10   0  -3   10.20    6.80
   9   0  -3    9.20    5.40
  -9   0   3   10.10    4.00
   8   0  -3   -1.60    4.10
   8   0  -3    0.10    4.20
  -8   0   3    0.90    3.10
  -8   0   3   -5.00    3.20
  -8   0   3    1.60    4.50
   8   0  -3   -0.10    3.40
  -7   0   3    0.30    2.80
  -7   0   3    1.50    3.90
   7   0  -3   -1.60    3.40
   7   0  -3   -6.20    3.40
   7   0  -3    0.50    3.10
  -5   0   3    1.00    2.80
  -5   0   3   -5.50    2.80
   4   0  -3    1.60    2.20
  -3   0   3    3.20    1.80
   3   0  -3    2.90    1.80
   3   0  -3   -2.30    1.80
   2   0  -3    1.60    1.40
   2   0  -3   -0.70    1.50
  -2   0   3    3.20    1.60
   2   0  -3   -1.30    1.50
  -2   0   3    1.40    1.50
  -2   0   3    1.20    1.60
  -1   0   3    0.40    1.30
  -1   0   3   -0.40    1.30
   1   0  -3    0.60    1.30
   1   0  -3    1.70    1.30
   0   0   3   -0.60    0.90
   0   0  -3   -1.00    0.80
   0   0  -3    2.90    0.90
   0   0   3   -0.50    0.90
  -1   0  -3   -1.30    0.80
   1   0   3   -1.20    0.80
  -1   0  -3    0.70    0.80
  -1   0  -3   -0.60    0.80
   1   0   3   -1.80    0.90
  -1   0  -3   -0.30    0.80
  -1   0  -3    0.40    0.80
   1   0   3   -1.30    0.70
   1   0   3    0.10    0.80
   1   0   3   -0.20    0.70
  -2   0  -3   -1.10    1.00
   2   0   3   -1.60    0.80
   2   0   3   -1.60    0.80
   2   0   3   -1.50    1.00
  -2   0  -3   -1.10    0.90
  -2   0  -3   -1.70    0.70
  -3   0  -3    2.20    1.10
  -3   0  -3   -2.10    1.20
   3   0   3   -1.50    1.30
   3   0   3    3.10    1.20
   3   0   3    0.40    1.50
  -3   0  -3    0.20    1.50
   3   0   3    3.50    1.20
   4   0   3   -0.50    1.60
  -4   0  -3    0.80    1.80
   4   0   3    1.90    1.50
   4   0   3    3.10    1.50
  -4   0  -3    2.20    1.20
   4   0   3    2.40    2.10
  -4   0  -3   -1.30    1.30
  -5   0  -3    2.30    2.20
   5   0   3    6.50    2.10
  -5   0  -3   -1.40    1.70
   5   0   3    2.30    2.10
   5   0   3   -2.20    2.30
  -5   0  -3    0.20    1.60
  -6   0  -3    1.60    1.80
   6   0   3   -2.40    2.50
   6   0   3    3.00    2.20
   6   0   3    1.20    2.50
  -6   0  -3    1.00    2.40
   6   0   3   -2.50    2.40
   7   0   3   -1.10    3.00
  -7   0  -3    0.30    1.90
   7   0   3   -2.20    4.40
  -7   0  -3   -2.30    2.10
   7   0   3   -3.10    2.80
  -7   0  -3   -0.20    2.00
   7   0   3   -0.20    2.50
  -8   0  -3   -0.20    2.60
  -8   0  -3    1.80    4.00
  -8   0  -3    2.70    2.50
   8   0   3   -2.90    3.60
   8   0   3    1.80    3.70
   8   0   3    2.60    3.10
   8   0   3   -0.60    3.80
  -8   0  -3   -4.70    2.40
  -9   0  -3    4.90    3.20
  -9   0  -3    2.40    3.10
   9   0   3    7.50    4.70
   9   0   3    9.60    5.00
  -9   0  -3    2.10    3.00
   9   0   3   -2.90    4.60
   9   0   3    3.00    3.60
 -10   0  -3    1.80    3.30
 -10   0  -3    0.50    3.90
 -10   0  -3   -2.00    3.60
  10   0   3    7.30    6.10
  10   0   3   -7.70    4.30
  10   0   3    1.70    5.90
  10   0   3   -8.70    5.70
 -11   0  -3    0.90    3.90
  11   0   3   13.30    8.10
 -11   0  -3    9.80    4.30
 -11   0  -3   -1.80    4.50
  11   0   3   11.80    5.40
  12   0   3    4.70   10.40
 -12   0  -3    2.40    4.20
 -12   0  -3    2.30    5.00
 -12   0  -3    3.60    4.40
  12   0   3   -5.20    5.30
 -13   0  -3   -3.30    5.50
 -13   0  -3    0.50    4.70
  13   0   3    5.80    6.30
 -13   0  -3  -11.10    8.10
  14   0   3   11.10    8.20
 -14   0  -3   -3.80    7.00
 -14   0  -3    3.90    5.90
  15   0   3    4.20    8.30
 -15   0  -3    6.70    6.90
  15  -1  -3    7.80    8.60
 -15  -1   3   16.40    8.70
 -15  -1   3    4.20    7.70
 -15  -1   3   12.40    6.40
 -15   1   3    7.40    7.80
  15   1  -3    8.00    7.80
 -14  -1   3   61.79    9.80
 -14  -1   3   35.70    7.90
  14  -1  -3   55.19   10.20
 -14   1   3   43.80    8.30
  14   1  -3   79.59   13.10
 -13  -1   3    6.90    5.40
 -13  -1   3   10.40    5.80
  13  -1  -3   23.50    8.30
 -13   1   3    9.20    7.80
 -13   1   3   12.00    7.60
 -13   1   3   23.80   15.50
  13   1  -3   21.90    6.60
 -12  -1   3   45.50    6.60
  12  -1  -3   48.20   12.00
 -12  -1   3   41.50    6.30
  12  -1  -3   41.40    8.40
 -12   1   3   43.20    7.30
  12   1  -3   60.19    9.90
 -12   1   3   42.80    7.60
 -11  -1   3   34.10    6.00
 -11  -1   3   47.60    6.30
  11  -1  -3   45.10   10.10
 -11  -1   3   39.50    6.00
  11  -1  -3   47.90   11.10
 -11   1   3   44.10    7.00
 -11   1   3   32.80    6.70
  10  -1  -3  375.56   29.30
  10  -1  -3  360.56   28.70
 -10  -1   3  423.76   27.10
  10  -1  -3  362.06   28.70
 -10  -1   3  449.26   27.20
 -10  -1   3  440.66   27.10
  10   1  -3  387.66   28.40
 -10   1   3  369.86   27.60
 -10   1   3  384.46   27.50
  10   1  -3  435.16   27.30
  10   1  -3  390.16   28.00
   9  -1  -3   96.69   12.30
   9  -1  -3  122.19   12.30
  -9  -1   3  117.29    9.70
  -9  -1   3  128.59    9.90
  -9  -1   3  110.59    9.70
  -9   1   3  110.89   10.60
   9   1  -3  114.29   11.60
   9   1  -3  108.59   11.00
   9   1  -3  125.69   10.10
  -9   1   3  111.39   10.50
   9   1  -3  113.69   11.40
  -8  -1   3  166.18   12.00
   8  -1  -3  172.38   13.30
  -8  -1   3  154.58   11.60
   8  -1  -3  157.08   13.20
   8  -1  -3  147.09   13.00
  -8  -1   3  156.98   12.30
  -8  -1   3  166.48   11.70
   8   1  -3  155.78   12.60
  -8   1   3  149.79   12.20
   8   1  -3  169.98   11.70
  -8   1   3  161.48   12.10
  -8   1   3  129.79   14.60
   8   1  -3  153.18   12.40
   8   1  -3  148.89   12.60
   7  -1  -3  482.95   32.80
  -7  -1   3  504.95   32.40
  -7  -1   3  529.85   32.30
  -7  -1   3  497.75   32.20
   7  -1  -3  488.25   32.90
  -7  -1   3  514.05   32.40
   7  -1  -3  480.95   32.80
  -7   1   3  439.46   33.10
   7   1  -3  477.55   32.50
  -7   1   3  505.35   32.40
   7   1  -3  512.95   32.10
   7   1  -3  492.25   32.70
   7   1  -3  481.45   32.50
  -7   1   3  510.45   32.40
   6  -1  -3  125.89   10.10
   6  -1  -3  116.89   10.60
   6  -1  -3  139.79   10.00
  -6  -1   3  134.49    9.30
  -6  -1   3  123.09    9.40
  -6  -1   3  131.19    9.20
  -6  -1   3  108.79    9.60
   6   1  -3  123.89    9.70
  -6   1   3  135.29    9.90
   6   1  -3  129.79    9.80
  -6   1   3  135.29    9.80
   6   1  -3  118.79   10.10
  -6   1   3  133.39   10.20
   6   1  -3  125.09    9.10
  -5  -1   3 1108.89   67.69
  -5  -1   3 1000.50   67.89
  -5  -1   3 1058.29   67.69
   5  -1  -3 1047.20   67.89
  -5  -1   3 1073.99   67.69
   5  -1  -3 1119.89   68.19
   5   1  -3 1065.29   67.89
   5   1  -3 1059.59   67.89
  -5   1   3 1085.29   68.09
   5   1  -3 1049.49   68.09
   5   1  -3 1052.39   67.59
  -5   1   3 1081.19   67.89
  -5   1   3 1077.69   67.79
  -5   1   3 1002.00   68.19
  -4  -1   3  793.92   51.09
   4  -1  -3  784.92   50.99
  -4  -1   3  803.02   50.79
  -4  -1   3  816.92   50.89
   4  -1  -3  786.02   50.99
  -4  -1   3  811.92   50.79
   4  -1  -3  848.42   51.29
   4   1  -3  762.32   50.89
   4   1  -3  758.42   51.09
  -4   1   3  804.12   51.29
  -4   1   3  802.02   50.99
  -4   1   3  821.02   51.09
   4   1  -3  782.92   50.79
   4   1  -3  772.02   50.89
   3  -1  -3 4458.85  282.17
   3  -1  -3 4575.84  282.17
  -3   1   3 4167.88  282.27
   3   1  -3 4620.84  282.17
   3   1  -3 4450.35  282.07
   3   1  -3 4211.38  282.27
  -3   1   3 4531.15  282.17
  -3   1   3 4680.43  282.17
  -2  -1   3 1035.30   66.99
   2  -1  -3 1073.79   67.29
  -2  -1   3 1006.80   67.19
   2  -1  -3 1085.99   67.09
   2  -1  -3 1081.99   67.09
  -2  -1   3 1006.10   66.99
  -2   1   3 1058.69   67.29
   2   1  -3 1044.90   66.99
  -2   1   3 1047.90   67.09
   2   1  -3 1064.19   66.99
  -2   1   3 1107.19   67.09
   1  -1  -3 3904.61  255.17
   1  -1  -3 4068.99  255.17
   1  -1  -3 4039.00  255.37
  -1   1   3 4136.49  255.17
  -1   1   3 4037.00  255.17
  -2  -1  -3 1921.51  127.49
   2  -1   3 2022.00  127.69
   2  -1   3 1986.70  127.69
  -2  -1  -3 2026.70  127.59
  -2  -1  -3 2098.09  127.69
  -2  -1  -3 1830.92  127.69
  -2  -1  -3 1964.50  127.69
   2  -1   3 2007.70  127.69
  -2   1  -3 1916.71  127.69
   2   1   3 1966.40  127.69
   2   1   3 2016.40  127.59
   2   1   3 2166.18  127.69
   2   1   3 2146.59  127.59
   2   1   3 2031.80  127.59
   2   1   3 2154.58  127.59
  -3  -1  -3   47.40    3.60
  -3  -1  -3   45.20    3.90
   3  -1   3   44.00    3.60
   3  -1   3   43.00    3.70
  -3  -1  -3   38.10    3.90
  -3  -1  -3   45.90    3.70
   3   1   3   47.90    4.30
   3   1   3   46.50    3.90
   3   1   3   44.30    3.70
  -3   1  -3   46.20    3.50
   3   1   3   47.10    3.50
   3   1   3   43.60    4.10
   4  -1   3 1149.78   75.79
  -4  -1  -3 1210.78   75.89
  -4  -1  -3 1116.29   75.89
   4  -1   3 1221.48   75.79
  -4  -1  -3 1198.48   75.79
   4   1   3 1211.28   75.99
   4   1   3 1297.47   75.79
  -4   1  -3 1200.38   76.19
   4   1   3 1201.08   75.99
  -4   1  -3 1063.49   75.69
   4   1   3 1267.27   75.99
  -5  -1  -3  197.48   13.30
  -5  -1  -3  192.48   13.30
   5  -1   3  191.18   13.30
  -5  -1  -3  208.58   13.10
   5  -1   3  210.38   13.80
   5  -1   3  180.48   13.20
  -5  -1  -3  194.48   13.10
  -5   1  -3  198.58   13.10
  -5   1  -3  215.48   14.40
   5   1   3  189.38   13.60
  -5   1  -3  185.48   13.10
   5   1   3  198.18   13.40
   5   1   3  204.88   13.30
   5   1   3  196.48   13.30
  -6  -1  -3 1578.14  102.79
   6  -1   3 1570.94  102.79
  -6  -1  -3 1647.74  102.79
  -6  -1  -3 1620.34  102.59
   6  -1   3 1666.83  103.19
  -6  -1  -3 1729.53  102.69
   6  -1   3 1593.24  102.89
  -6   1  -3 1453.15  103.19
  -6   1  -3 1672.83  102.59
   6   1   3 1671.43  102.79
   6   1   3 1646.74  102.79
   6   1   3 1639.54  102.79
   6   1   3 1564.84  102.89
  -6   1  -3 1581.74  102.59
  -7  -1  -3   54.09    5.10
   7  -1   3   63.69    6.10
   7  -1   3   62.19    6.70
  -7  -1  -3   47.30    5.00
   7  -1   3   50.19    6.00
  -7  -1  -3   51.79    6.10
  -7  -1  -3   54.69    5.70
   7   1   3   49.10    6.50
  -7   1  -3   43.20    8.60
  -7   1  -3   53.69    5.30
   7   1   3   57.69    5.80
   7   1   3   58.19    5.90
  -7   1  -3   55.19    5.20
   7   1   3   48.70    5.80
  -7   1  -3   50.79    6.10
  -8  -1  -3   31.50    4.10
   8  -1   3   28.30    4.80
   8  -1   3   28.80    5.10
  -8  -1  -3   32.70    4.50
  -8  -1  -3   24.80    4.50
  -8  -1  -3   34.40    4.50
   8  -1   3   29.10    5.10
   8   1   3   29.10    4.20
  -8   1  -3   33.70    5.30
  -8   1  -3   28.20    4.50
   8   1   3   32.60    4.70
  -8   1  -3   25.40    6.50
   8   1   3   34.00    4.80
   8   1   3   17.10    4.70
  -8   1  -3   38.80    4.80
   9  -1   3   10.10    4.40
  -9  -1  -3    2.00    3.50
   9  -1   3   11.80    5.10
  -9  -1  -3    8.30    3.00
  -9  -1  -3    4.10    3.10
  -9   1  -3    6.30    3.20
   9   1   3    6.50    3.60
   9   1   3   10.00    4.70
   9   1   3    4.00    5.40
   9   1   3    9.00    4.80
  -9   1  -3    5.70    5.60
  10  -1   3  797.72   54.39
  10  -1   3  803.12   54.19
 -10  -1  -3  896.61   53.49
  10  -1   3  752.92   54.69
 -10  -1  -3  883.51   53.39
 -10  -1  -3  812.62   53.59
  10   1   3  893.71   54.49
  10   1   3  914.31   53.99
 -10   1  -3  871.71   54.59
 -10   1  -3  702.43   53.29
 -10   1  -3  762.62   53.39
 -11  -1  -3    3.20    3.70
  11  -1   3    3.40    7.50
  11  -1   3    6.30    9.30
  11  -1   3   -0.50    5.60
 -11  -1  -3   -3.10    4.20
 -11  -1  -3   -1.00    4.00
 -11   1  -3   -0.40    3.80
  11   1   3   -1.60    8.40
  11   1   3   -1.90    4.70
 -11   1  -3    1.10    4.30
 -11   1  -3    2.70    6.60
 -12  -1  -3   68.99    9.50
  12  -1   3   98.79   12.40
 -12  -1  -3   75.39    8.60
 -12   1  -3   53.19    8.90
 -12   1  -3   67.29    9.10
  12   1   3   98.89   11.40
 -13  -1  -3   11.10    5.10
 -13  -1  -3    3.70    5.90
 -13  -1  -3    7.00    5.80
  13  -1   3    7.40    6.90
  13   1   3    5.50    6.50
 -14  -1  -3   14.80    6.50
  14  -1   3    4.00    7.50
 -14  -1  -3   17.90    6.80
 -14  -1  -3    6.10    5.80
  14   1   3    4.90    6.00
 -14   1  -3    7.70    6.20
  14   1   3    9.40    7.30
 -14   1  -3    9.80   11.00
 -15  -1  -3   -4.40    8.30
 -15  -1  -3    9.30    6.60
  15  -1   3    2.70    8.80
 -15   1  -3    9.60    7.40
  15   1   3    7.30    9.00
  15   1   3   -4.00    7.10
  15  -2  -3   97.59   14.70
 -15  -2   3   91.39   10.90
 -15  -2   3  100.39   13.40
 -15  -2   3   64.89   10.90
 -15   2   3   62.09   11.40
  15   2  -3   78.09   11.10
  15   2  -3   90.59   15.00
 -14  -2   3   10.50    6.60
 -14  -2   3    1.30    5.10
  14  -2  -3   -3.80   10.00
 -14  -2   3   -2.80    7.60
 -14   2   3   28.10    8.70
  14   2  -3   11.80    5.80
  14   2  -3    8.60    6.70
  13  -2  -3    3.60    9.80
 -13  -2   3   10.50    4.90
 -13  -2   3    7.40    5.00
 -13  -2   3    1.90    6.10
 -13   2   3   -0.90    6.70
  13   2  -3    3.40    5.80
 -12  -2   3   52.29    6.80
 -12  -2   3   48.80    7.80
 -12  -2   3   56.69    7.70
  12  -2  -3   51.09   10.40
  12   2  -3   62.59    9.60
 -12   2   3   52.89    8.50
 -12   2   3   53.99    8.40
 -11  -2   3  205.78   15.00
 -11  -2   3  191.28   14.00
  11  -2  -3  180.98   19.30
 -11  -2   3  192.58   14.60
  11  -2  -3  163.68   21.00
  11  -2  -3  152.88   20.00
 -11   2   3  193.78   16.20
 -11   2   3  141.49   15.90
  10  -2  -3   10.50    8.70
 -10  -2   3   -1.50    3.80
  10  -2  -3   21.10    9.00
 -10  -2   3    0.40    3.80
 -10   2   3   28.10    6.00
  10   2  -3    9.00    4.20
 -10   2   3   18.50    6.00
  -9  -2   3    9.40    4.20
   9  -2  -3    6.40    6.50
   9  -2  -3   19.30    6.90
  -9  -2   3   10.80    3.60
  -9  -2   3    8.90    3.50
   9  -2  -3   12.40    6.30
  -9   2   3   11.30    5.40
   9   2  -3    1.90    3.70
  -9   2   3    7.80    5.20
   9   2  -3    4.90    5.20
   8  -2  -3   31.20    5.90
  -8  -2   3   29.00    4.10
   8  -2  -3   20.60    6.40
  -8  -2   3   27.00    4.00
  -8  -2   3   31.80    6.00
  -8   2   3   23.60    5.30
   8   2  -3   26.80    5.20
   8   2  -3   40.90    5.50
  -8   2   3   33.60    8.40
  -8   2   3   28.70    5.30
   8   2  -3   45.50    8.00
   8   2  -3   27.20    5.20
  -7  -2   3   11.10    3.00
   7  -2  -3   16.60    7.20
   7  -2  -3    5.00    4.60
  -7  -2   3   11.70    3.00
  -7  -2   3    8.00    2.70
   7  -2  -3   12.40    5.10
   7  -2  -3    7.40    4.70
  -7  -2   3    9.20    3.50
  -7   2   3   12.30    5.00
   7   2  -3   12.90    3.70
  -7   2   3    6.60    4.00
   7   2  -3    8.60    4.10
  -7   2   3   10.60    4.10
   7   2  -3    6.40    3.60
   7   2  -3   14.00    3.00
  -7   2   3   10.40    5.00
  -6  -2   3  159.88   12.20
   6  -2  -3  169.78   13.60
  -6  -2   3  172.98   11.40
  -6  -2   3  177.38   11.50
   6  -2  -3  160.68   12.90
   6  -2  -3  128.79   13.20
  -6  -2   3  167.48   11.40
  -6   2   3  169.48   12.20
   6   2  -3  163.28   12.60
  -6   2   3  130.79   13.10
   6   2  -3  162.98   11.50
   6   2  -3  169.78   11.30
  -6   2   3  165.08   12.80
  -6   2   3  168.88   12.20
   6   2  -3  160.88   12.00
   6   2  -3  173.78   12.00
  -5  -2   3 3099.19  218.48
   5  -2  -3 3624.54  218.88
  -5  -2   3 3490.75  218.98
   5  -2  -3 3621.24  219.38
  -5  -2   3 3570.14  218.58
   5  -2  -3 3369.26  219.28
   5  -2  -3 3478.55  218.88
  -5  -2   3 3414.56  218.58
  -5   2   3 3176.48  219.08
   5   2  -3 3673.53  218.78
  -5   2   3 3188.88  219.18
  -5   2   3 3524.05  219.08
   5   2  -3 3506.85  218.58
  -5   2   3 3639.04  218.78
   5   2  -3 3126.39  218.58
   5   2  -3 3539.15  219.18
   5   2  -3 3673.33  218.78
  -4  -2   3  682.33   47.50
   4  -2  -3  729.83   47.90
   4  -2  -3  777.62   48.70
  -4  -2   3  735.53   47.50
  -4  -2   3  743.73   48.10
  -4  -2   3  738.93   47.60
   4  -2  -3  742.23   47.90
   4  -2  -3  745.43   48.50
  -4   2   3  740.73   48.10
   4   2  -3  782.42   48.30
  -4   2   3  774.02   47.90
   4   2  -3  773.52   47.60
  -4   2   3  799.72   48.00
   4   2  -3  773.22   47.70
  -4   2   3  699.43   48.20
  -4   2   3  709.33   48.50
   4   2  -3  789.02   47.80
   4   2  -3  687.73   47.60
   3  -2  -3  130.39   11.30
  -3  -2   3  135.99   10.40
   3  -2  -3  136.99   10.20
  -3  -2   3  140.89    9.40
  -3  -2   3  142.39    9.50
  -3  -2   3  127.39    9.30
   3  -2  -3  132.29   10.20
  -3   2   3  145.29   11.00
   3   2  -3  148.29    9.50
   3   2  -3  145.09    9.80
   3   2  -3  137.19    9.80
  -3   2   3  145.29   10.60
  -3   2   3  157.58   10.60
  -3   2   3  157.28   11.40
   3   2  -3  138.59   10.40
  -3   2   3  135.09   11.00
   2  -2  -3  149.69   10.80
   2  -2  -3  148.69   10.70
  -2  -2   3  167.08   10.30
  -2  -2   3  156.78   11.30
   2  -2  -3  134.39   11.90
   2  -2  -3  161.68   12.10
  -2   2   3  152.88   11.10
  -2   2   3  130.29   11.90
   2   2  -3  169.78   11.30
   2   2  -3  181.58   10.50
   1  -2  -3  423.76   27.80
   1  -2  -3  445.16   27.80
  -1  -2   3  472.05   27.70
  -1   2   3  419.46   27.90
  -1   2   3  399.66   28.80
  -1  -2  -3  478.75   30.10
   1  -2   3  502.25   30.80
  -1  -2  -3  476.55   30.10
  -1  -2  -3  494.95   30.20
  -1  -2  -3  475.95   30.20
   1  -2   3  449.86   30.20
   1   2   3  464.95   30.20
   1   2   3  459.45   30.20
  -1   2  -3  415.46   32.30
   1   2   3  477.85   30.10
   1   2   3  490.45   30.30
   1   2   3  474.65   30.90
   1   2   3  481.25   30.10
  -1   2  -3  473.25   30.20
  -1   2  -3  436.46   30.20
  -2  -2  -3 1334.27   82.49
   2  -2   3 1173.38   82.49
   2  -2   3 1325.37   82.99
   2  -2   3 1412.56   82.39
  -2  -2  -3 1303.07   82.39
  -2  -2  -3 1302.57   82.39
   2   2   3 1297.27   82.39
   2   2   3 1313.47   82.29
   2   2   3 1379.16   82.39
  -2   2  -3 1151.78   82.39
   2   2   3 1302.67   82.29
   2   2   3 1273.37   82.39
   2   2   3 1309.97   82.49
  -3  -2  -3  669.53   42.90
  -3  -2  -3  707.63   43.00
  -3  -2  -3  702.23   43.10
  -3  -2  -3  656.03   43.00
   3  -2   3  706.33   43.90
  -3  -2  -3  649.14   43.10
   3  -2   3  726.53   43.40
   3  -2   3  680.13   43.30
   3  -2   3  614.64   43.20
   3   2   3  669.43   43.20
   3   2   3  721.13   43.00
   3   2   3  695.83   42.90
  -3   2  -3  624.14   43.70
   3   2   3  695.73   42.90
  -3   2  -3  572.04   43.00
   3   2   3  680.03   43.00
   4  -2   3  633.74   38.90
  -4  -2  -3  595.84   38.00
   4  -2   3  599.64   38.20
  -4  -2  -3  549.25   37.70
  -4  -2  -3  573.74   37.90
  -4  -2  -3  592.84   37.80
   4  -2   3  588.84   38.30
   4   2   3  599.04   37.70
   4   2   3  581.04   37.70
   4   2   3  572.74   38.10
   4   2   3  651.53   37.80
   4   2   3  583.94   37.80
  -4   2  -3  540.25   38.40
  -5  -2  -3    9.70    2.10
  -5  -2  -3    9.10    2.10
  -5  -2  -3    7.60    2.50
  -5  -2  -3    9.10    2.20
   5   2   3    9.70    2.10
   5   2   3    6.50    3.00
   5   2   3    8.40    3.90
   5   2   3    7.80    2.30
   5   2   3   11.50    2.40
   5   2   3    7.90    2.80
   6  -2   3   56.59    6.00
  -6  -2  -3   44.30    5.30
  -6  -2  -3   40.10    4.70
  -6  -2  -3   48.10    4.80
  -6  -2  -3   42.90    4.70
   6  -2   3   43.00    5.90
   6   2   3   54.49    5.80
   6   2   3   59.09    4.70
   6   2   3   42.70    5.20
   6   2   3   40.40    6.30
   6   2   3   46.30    5.10
   7  -2   3  285.77   22.30
  -7  -2  -3  305.87   21.30
   7  -2   3  320.97   22.50
   7  -2   3  277.37   21.60
  -7  -2  -3  341.07   21.20
  -7  -2  -3  341.37   21.20
   7  -2   3  302.47   23.80
  -7  -2  -3  356.46   21.60
   7   2   3  339.17   21.50
  -7   2  -3  312.77   21.00
   7   2   3  318.07   22.00
  -7   2  -3  298.37   22.10
   7   2   3  323.87   21.70
   7   2   3  344.27   21.50
  -8  -2  -3    0.00    2.60
   8  -2   3    5.60    4.90
  -8  -2  -3   -1.30    3.30
   8  -2   3    4.20    4.40
  -8  -2  -3   -3.30    2.50
   8  -2   3    1.30    5.00
  -8   2  -3   -2.10    2.80
   8   2   3   -1.80    3.20
  -8   2  -3   -2.40    2.70
   8   2   3    0.50    2.40
  -8   2  -3    7.20    5.00
  -8   2  -3    2.30    9.10
   8   2   3    5.50    4.10
   9  -2   3  199.18   19.40
  -9  -2  -3  264.97   17.70
   9  -2   3  213.08   19.50
  -9  -2  -3  270.87   17.00
   9  -2   3  225.68   19.10
  -9  -2  -3  263.57   17.00
  -9   2  -3  202.18   16.90
   9   2   3  263.77   17.90
  -9   2  -3  226.98   19.10
   9   2   3  269.67   18.20
   9   2   3  276.77   16.90
  -9   2  -3  229.88   16.90
  10  -2   3   16.00    8.90
  10  -2   3   31.20    8.50
 -10  -2  -3   27.00    4.70
 -10  -2  -3   27.70    5.50
 -10  -2  -3   30.30    4.80
  10   2   3   37.00    4.80
 -10   2  -3   23.20    5.00
 -11  -2  -3   12.40    4.40
  11  -2   3   26.10   10.00
  11  -2   3   19.00    7.10
 -11  -2  -3   18.60    4.50
 -11  -2  -3   18.80    5.60
  11  -2   3   11.20   10.20
 -11   2  -3   18.70    5.40
  11   2   3   17.70    4.30
 -11   2  -3   25.50    4.90
  11   2   3   18.30    5.60
 -12  -2  -3    2.50    5.30
 -12  -2  -3    4.40    4.90
  12  -2   3    8.20    8.30
 -12  -2  -3    9.30    4.60
  12   2   3    4.50    6.20
 -12   2  -3    7.90    9.90
  12   2   3    9.10    4.50
 -12   2  -3   13.70    5.10
 -13  -2  -3    6.40    5.20
  13  -2   3   13.30    8.90
 -13  -2  -3    3.70    6.70
  13   2   3    7.10    7.00
  13   2   3   13.10    5.20
 -13   2  -3   10.50    5.80
  14  -2   3   33.80   10.70
 -14  -2  -3   12.90    6.90
 -14  -2  -3   20.20    6.30
 -14  -2  -3   17.10    7.40
  14   2   3   17.60    7.90
  14   2   3   33.20    6.90
 -14   2  -3   22.90    6.80
  15  -2   3    1.90    9.60
 -15  -2  -3  -14.40    7.90
 -15  -2  -3    2.10    9.70
  15   2   3   16.30    7.20
 -15  -3   3   10.90    6.80
 -15  -3   3    7.40    7.20
  15   3  -3    8.00    9.20
  15   3  -3    4.50    7.00
 -14  -3   3    2.00    5.00
 -14  -3   3   -3.20    7.30
 -14  -3   3    8.40    6.10
  14  -3  -3   -5.80   12.10
  14   3  -3   -3.90    5.50
 -14   3   3   14.70    8.90
  14   3  -3    8.40    7.70
  13  -3  -3   -9.10   12.10
 -13  -3   3    8.40    5.30
 -13  -3   3    0.10    7.00
 -13  -3   3    3.20    4.50
  13   3  -3   11.50    5.40
 -13   3   3   11.10    7.70
  13   3  -3    6.50    6.70
 -12  -3   3   -0.10    5.90
 -12  -3   3    1.20    4.10
 -12  -3   3    2.40    4.60
  12  -3  -3  -16.90   11.70
  12   3  -3    9.00    6.20
 -12   3   3    0.60    6.70
  12   3  -3   -0.50    4.40
  11  -3  -3    8.00   11.50
 -11  -3   3   -0.30    3.60
 -11  -3   3   -3.20    5.10
  11  -3  -3   -3.00    9.30
  11   3  -3   -1.80    3.80
  11   3  -3    8.60    5.40
 -11   3   3    1.70    6.60
 -11   3   3   -0.40    7.30
 -10  -3   3  293.97   18.90
  10  -3  -3  242.78   24.50
 -10  -3   3  307.27   20.00
  10  -3  -3  234.68   23.50
  10   3  -3  266.77   20.90
  10   3  -3  283.57   20.10
 -10   3   3  264.37   21.30
 -10   3   3  221.18   20.70
  -9  -3   3  793.72   46.70
  -9  -3   3  757.32   45.90
   9  -3  -3  662.53   48.90
   9  -3  -3  597.04   48.00
  -9  -3   3  747.03   45.80
   9   3  -3  697.73   45.80
  -9   3   3  678.73   46.50
   9   3  -3  711.83   46.50
  -9   3   3  701.63   46.90
  -8  -3   3  107.99    8.50
   8  -3  -3  129.69   14.50
  -8  -3   3  101.79    8.40
  -8  -3   3  105.59    9.30
   8  -3  -3   96.99   11.80
  -8  -3   3  113.19   10.30
   8  -3  -3   84.29   12.50
  -8   3   3   97.89   10.50
   8   3  -3  117.29    8.60
  -8   3   3   90.99   10.40
  -8   3   3  116.39   14.80
   8   3  -3  103.69    9.80
  -7  -3   3   24.50    3.40
  -7  -3   3   21.90    4.70
   7  -3  -3   13.10    5.60
  -7  -3   3   24.50    3.30
   7  -3  -3   21.90    8.20
  -7  -3   3   17.60    3.20
   7  -3  -3   17.90    7.00
   7  -3  -3    9.30    7.20
  -7   3   3   27.30    5.00
  -7   3   3   21.10    7.20
  -7   3   3   29.40    5.10
   7   3  -3   25.80    4.60
  -7   3   3   24.70    7.90
   7   3  -3   19.70    4.40
   7   3  -3   27.30    3.80
   7   3  -3   19.10    4.00
   7   3  -3   26.90    5.10
   6  -3  -3  141.39   11.60
   6  -3  -3  157.28   13.80
  -6  -3   3  138.69    9.80
   6  -3  -3  120.59   13.70
   6  -3  -3  139.69   11.00
  -6  -3   3  137.39    9.80
  -6  -3   3  135.29    9.80
  -6  -3   3  147.49   11.30
   6   3  -3  132.69   10.00
  -6   3   3  127.99   13.50
  -6   3   3  137.99   12.70
  -6   3   3  144.39   12.60
  -6   3   3  120.69   13.20
   6   3  -3  151.58   11.90
   6   3  -3  144.99   10.70
   6   3  -3  144.09   10.70
  -6   3   3  129.29   13.20
  -5  -3   3    0.90    1.80
   5  -3  -3    2.30    5.60
  -5  -3   3   -0.30    1.80
   5  -3  -3    1.20    6.20
   5  -3  -3    3.80    3.70
  -5  -3   3    6.00    3.10
  -5   3   3   -0.20    3.90
   5   3  -3    1.30    2.70
  -5   3   3   -1.10    5.20
   5   3  -3    5.30    2.80
   5   3  -3    4.70    3.30
  -5   3   3   -3.80    4.90
  -5   3   3    4.60    5.00
  -4  -3   3  279.97   20.80
  -4  -3   3  282.07   21.70
   4  -3  -3  300.87   22.90
   4  -3  -3  379.46   23.40
  -4   3   3  357.06   22.80
   4   3  -3  368.06   21.30
   4   3  -3  322.97   21.20
   4   3  -3  296.67   22.00
  -3  -3   3   21.70    3.60
   3  -3  -3   16.80    4.60
  -3  -3   3   15.30    2.50
   3  -3  -3   15.60    3.10
  -3  -3   3   13.90    2.70
   3  -3  -3    2.50    5.30
   3  -3  -3   25.00    4.00
   3   3  -3   15.90    2.60
  -3   3   3   18.40    5.50
   2  -3  -3  601.54   40.80
   2  -3  -3  586.94   41.70
  -2  -3   3  631.74   40.50
   2  -3  -3  611.74   41.80
  -2  -3   3  654.33   41.10
   2   3  -3  678.23   40.70
  -2   3   3  617.14   41.80
   2   3  -3  684.73   41.20
   1  -3  -3 2720.13  181.18
  -1  -3   3 2912.11  181.38
   1  -3  -3 2715.63  181.78
  -1  -3   3 2857.31  180.98
  -1   3   3 2849.61  181.98
   1   3  -3 3101.09  181.18
   0  -3  -3 1282.17   82.59
   0  -3   3 1344.87   82.79
   0  -3  -3 1288.67   82.39
   0  -3  -3 1332.17   83.29
   0  -3   3 1231.58   82.39
   0   3  -3 1328.47   82.59
   0   3   3 1307.47   83.39
   0   3   3 1267.17   82.59
  -1  -3  -3  259.57   17.10
  -1  -3  -3  252.27   17.20
  -1  -3  -3  253.67   17.20
   1  -3   3  273.97   18.50
   1  -3   3  235.08   17.20
  -1  -3  -3  273.17   17.20
   1   3   3  266.57   18.60
   1   3   3  256.87   17.10
   1   3   3  258.57   17.00
  -1   3  -3  259.17   17.30
   1   3   3  279.17   17.50
  -1   3  -3  269.17   18.10
   1   3   3  260.57   17.30
  -2  -3  -3   72.59    6.00
  -2  -3  -3   82.79    6.10
  -2  -3  -3   73.59    5.90
  -2  -3  -3   68.69    6.10
   2   3   3   71.39    6.00
   2   3   3   77.19    8.00
   2   3   3   75.89    5.80
   2   3   3   70.39    6.20
   2   3   3   78.19    6.20
   2   3   3   84.69    5.70
   2   3   3   82.19    6.80
  -3  -3  -3 1521.95  104.29
  -3  -3  -3 1569.14  103.99
   3  -3   3 1819.02  104.79
  -3  -3  -3 1675.73  104.29
   3  -3   3 1662.83  104.49
  -3  -3  -3 1662.13  104.09
   3  -3   3 1681.83  105.09
  -3  -3  -3 1621.54  103.99
   3  -3   3 1755.92  104.29
   3   3   3 1646.44  104.09
  -3   3  -3 1517.45  104.19
   3   3   3 1579.84  103.99
   3   3   3 1643.24  104.39
   3   3   3 1542.25  103.89
  -3   3  -3 1669.83  104.79
   3   3   3 1693.13  104.19
   3   3   3 1615.74  104.29
  -4  -3  -3   45.90    5.10
   4  -3   3   56.09    8.30
  -4  -3  -3   54.39    5.00
   4  -3   3   58.39    8.70
  -4  -3  -3   53.39    5.10
   4  -3   3   67.59    7.80
  -4  -3  -3   60.89    4.70
   4  -3   3   51.39    5.80
  -4  -3  -3   64.79    5.50
   4   3   3   50.79    5.10
  -4   3  -3   65.39    8.90
   4   3   3   44.30    4.90
   4   3   3   58.39    5.20
   4   3   3   51.09    5.10
  -4   3  -3   54.49    5.90
   4   3   3   51.69    6.40
   4   3   3   51.69    4.90
  -5  -3  -3   36.70    4.90
  -5  -3  -3   32.80    4.50
   5  -3   3   48.70    8.00
   5  -3   3   36.20    6.10
   5  -3   3   42.90    8.30
  -5  -3  -3   38.60    3.90
  -5  -3  -3   28.30    4.20
   5  -3   3   37.10    5.20
   5   3   3   32.50    4.40
   5   3   3   38.00    4.00
   5   3   3   36.70    4.90
   5   3   3   33.40    3.90
   5   3   3   25.90    4.40
  -5   3  -3   49.70    8.30
   6  -3   3   72.89   10.30
  -6  -3  -3   81.29    6.80
  -6  -3  -3   83.89    7.60
  -6  -3  -3   82.39    7.00
   6  -3   3   65.59   12.00
  -6  -3  -3   74.29    6.80
   6   3   3   78.59    8.50
  -6   3  -3  101.69    8.70
   6   3   3   80.49    7.00
   6   3   3   87.19    7.00
   6   3   3   78.19    7.00
  -6   3  -3   87.29   10.60
  -7  -3  -3  146.89   11.20
  -7  -3  -3  170.28   12.00
  -7  -3  -3  152.28   11.20
   7   3   3  156.08   11.40
   7   3   3  147.99   11.30
   7   3   3  159.18   11.90
  -8  -3  -3  185.08   12.90
  -8  -3  -3  174.88   12.80
  -8  -3  -3  178.98   13.70
   8   3   3  181.78   13.00
   8   3   3  173.78   12.90
  -9  -3  -3  365.26   23.50
  -9  -3  -3  378.46   24.30
  -9  -3  -3  344.37   23.40
   9  -3   3  333.57   27.10
  -9   3  -3  319.87   23.50
   9   3   3  329.77   24.70
   9   3   3  361.06   23.60
  -9   3  -3  367.06   26.00
   9   3   3  336.17   23.50
 -10  -3  -3  129.69    9.40
 -10  -3  -3  115.79    9.40
  10  -3   3   88.69   12.90
 -10  -3  -3  112.19   10.80
  10  -3   3   72.19   12.60
  10   3   3   97.49    9.40
 -10   3  -3   94.49    9.70
  10   3   3   94.89   11.60
  10   3   3  122.09    9.80
 -10   3  -3  101.99   10.00
  11  -3   3    1.00    8.90
 -11  -3  -3    4.50    3.90
 -11  -3  -3   -5.00    4.90
  11   3   3    6.20    4.50
  11   3   3    6.30    5.10
  11   3   3    1.50    5.90
 -11   3  -3   10.80    4.50
 -12  -3  -3   32.10    5.80
  12  -3   3   26.80   10.40
 -12  -3  -3   31.10    5.70
 -12  -3  -3   28.90    6.80
 -12   3  -3   30.80    6.20
  12   3   3   45.00    6.30
  12   3   3   36.40    7.60
  12   3   3   34.40    6.20
 -13  -3  -3   -3.20    5.70
  13  -3   3    6.70   11.70
 -13  -3  -3    1.80    5.20
 -13  -3  -3    1.20    6.30
 -13   3  -3    3.90    7.80
  13   3   3    7.60    7.70
  13   3   3    8.10    5.80
  13   3   3   15.30    6.20
  14  -3   3   15.90   10.80
 -14  -3  -3   24.10    7.40
 -14  -3  -3   17.20    9.60
 -14  -3  -3   18.90    6.50
  14   3   3   23.20    8.90
  14   3   3   15.00    6.90
 -14  -4   3   11.30    6.10
 -14  -4   3    0.40    5.30
  14  -4  -3  -30.10   17.20
 -14  -4   3   -4.60    8.60
  14   4  -3   13.40    6.40
 -13  -4   3   13.20    5.50
  13  -4  -3  -17.90   14.20
 -13  -4   3    1.10    7.40
 -13  -4   3   11.90    4.80
  13   4  -3    5.40    5.70
 -12  -4   3    4.30    4.10
  12  -4  -3    6.30   13.90
 -12  -4   3    5.60    6.30
 -12  -4   3    1.50    4.60
  12   4  -3   12.30    5.40
 -12   4   3   15.40    8.40
 -11  -4   3    4.90    5.90
 -11  -4   3    3.00    3.80
  11  -4  -3   11.60   13.10
 -11  -4   3    5.40    4.20
  11   4  -3   12.80    4.70
 -11   4   3   25.00    8.20
 -11   4   3   32.50   12.00
  10  -4  -3    3.00   11.80
  10  -4  -3   14.50   13.00
 -10  -4   3    2.40    3.70
  10  -4  -3   15.80   10.30
 -10  -4   3    5.90    4.00
 -10  -4   3    7.70    5.00
 -10   4   3   16.40    7.60
  10   4  -3    6.70    4.10
 -10   4   3   14.20   12.60
  -9  -4   3   69.39   11.00
   9  -4  -3   60.69   10.20
   9  -4  -3   37.00   14.30
  -9   4   3   51.49    8.60
  -9   4   3   93.59   13.60
   8  -4  -3   16.60    7.40
  -8  -4   3   18.30    5.10
   8  -4  -3   16.00    9.90
  -8   4   3    0.90    5.90
  -8   4   3   16.10    8.40
   8   4  -3   13.00    3.90
   7  -4  -3   13.90    9.10
  -7  -4   3   10.70    2.90
   7  -4  -3    0.70    6.00
  -7  -4   3   11.90    2.80
  -7  -4   3    9.60    4.60
  -7  -4   3    6.50    2.80
  -7   4   3   26.90    8.50
  -7   4   3   18.30    8.40
   7   4  -3   11.60    3.50
   6  -4  -3  102.99   16.30
  -6   4   3  119.29   13.60
   5  -4  -3 1343.17   95.49
   5  -4  -3 1401.66   96.89
  -5  -4   3 1392.36   94.99
  -5  -4   3 1612.64   95.79
  -5  -4   3 1465.85   94.79
   5   4  -3 1557.74   95.19
   5   4  -3 1636.94   95.19
   5   4  -3 1568.74   96.19
  -5   4   3 1395.56   96.49
   5   4  -3 1559.34   95.29
  -4  -4   3  879.91   57.19
   4  -4  -3  789.62   58.79
  -4  -4   3  853.61   57.19
  -4  -4   3  942.31   57.99
   4  -4  -3  864.91   57.69
   4  -4  -3  977.20   60.09
   4   4  -3  943.41   57.59
   4   4  -3  928.51   58.29
  -4   4   3  878.71   58.99
   3  -4  -3  398.36   31.90
  -3  -4   3  460.15   30.10
   3  -4  -3  437.66   32.30
  -3  -4   3  508.15   30.90
  -3  -4   3  450.95   30.20
   3  -4  -3  448.26   30.70
   3   4  -3  497.55   30.50
  -3   4   3  463.75   32.30
   3   4  -3  512.25   31.30
   2  -4  -3 1015.50   66.49
   2  -4  -3  932.91   65.09
  -2  -4   3 1094.29   65.39
  -2  -4   3  996.00   64.69
   2  -4  -3  898.21   66.09
  -2   4   3  987.10   66.39
   2   4  -3 1176.78   65.19
   1  -4  -3  327.57   24.60
   1  -4  -3  342.57   23.10
  -1   4   3  368.26   25.20
   0  -4   3  829.82   59.89
   0  -4  -3  933.81   60.09
   0  -4  -3  887.81   61.19
   0  -4   3  910.21   60.29
   0   4   3 1024.40   61.59
   0   4   3 1025.80   60.29
   0   4  -3  956.40   60.19
  -1  -4  -3    0.60    2.10
  -1  -4  -3    0.70    2.40
   1   4   3   -3.70    2.40
   1   4   3    3.90    5.80
   1   4   3    1.60    2.80
   2  -4   3  254.57   18.20
   2  -4   3  236.28   16.30
  -2  -4  -3  240.08   16.00
  -2  -4  -3  243.58   16.00
  -2  -4  -3  226.38   16.00
   2   4   3  215.48   15.50
   2   4   3  244.28   16.20
   2   4   3  209.58   16.00
   2   4   3  240.78   16.60
   2   4   3  257.77   18.20
  -3  -4  -3  342.87   21.20
  -3  -4  -3  328.27   21.10
  -3  -4  -3  302.97   20.90
  -3  -4  -3  320.17   21.30
   3   4   3  335.07   21.60
   3   4   3  327.27   21.60
   3   4   3  285.67   20.70
   3   4   3  325.37   21.90
   3   4   3  324.07   21.40
   3   4   3  292.17   20.80
   3   4   3  327.77   22.90
  -4  -4  -3   27.70    3.90
  -4  -4  -3   28.80    4.70
  -4  -4  -3   23.80    3.80
   4  -4   3   28.20    4.90
   4  -4   3   34.30    8.10
   4  -4   3   34.20    9.00
  -4  -4  -3   33.70    3.80
   4  -4   3   33.60    7.20
  -4  -4  -3   20.30    4.00
   4   4   3   32.10    3.90
   4   4   3   33.50    4.50
   4   4   3   29.30    3.50
   4   4   3   41.60    7.60
   4   4   3   30.20    4.00
   4   4   3   23.80    4.70
   4   4   3   26.90    3.60
  -4   4  -3   33.20    5.40
  -5  -4  -3  142.19   10.50
  -5  -4  -3  144.59   11.30
  -5  -4  -3  152.18   10.70
  -5  -4  -3  155.58   10.90
   5  -4   3  165.28   14.90
   5  -4   3  139.99   11.60
   5   4   3  147.69   11.20
   5   4   3  141.99   10.60
  -5   4  -3  131.49   14.50
  -5   4  -3  155.48   12.40
   5   4   3  136.89   13.50
   5   4   3  144.39   10.70
   6  -4   3  116.29   11.80
  -6  -4  -3  153.38   10.80
  -6  -4  -3  141.59   11.30
   6  -4   3  141.89   15.60
  -6  -4  -3  152.88   10.70
   6   4   3  145.39   10.60
   6   4   3  140.69   11.00
  -6   4  -3  145.19   13.10
  -6   4  -3  127.89   15.30
  -7  -4  -3  257.97   17.80
   7  -4   3  248.58   22.70
  -7  -4  -3  249.08   17.80
   7  -4   3  275.57   20.80
  -7  -4  -3  264.47   18.40
  -7   4  -3  263.47   20.50
   7   4   3  241.48   18.00
  -8  -4  -3   48.30    5.80
  -8  -4  -3   38.70    6.40
  -8  -4  -3   35.70    6.50
   8   4   3   38.80    5.80
   8   4   3   39.00    5.90
  -9  -4  -3  139.39   11.00
  -9  -4  -3  139.79   12.30
   9   4   3  128.79   11.40
   9   4   3  135.09   10.80
  -9   4  -3  124.69   11.00
 -10  -4  -3  124.59   10.80
 -10  -4  -3  120.49   12.70
 -10  -4  -3  136.29   11.10
  10   4   3  117.49   11.30
  10   4   3  121.69   10.70
 -11  -4  -3   28.40    5.50
 -11  -4  -3   26.00    6.40
 -11  -4  -3   24.30    5.40
  11  -4   3   15.00   13.10
  11   4   3   28.30    6.10
 -11   4  -3   27.30   10.70
  11   4   3   12.80    5.20
  12  -4   3   -6.10   12.40
 -12  -4  -3    2.30    5.10
 -12  -4  -3    8.20    6.40
 -12  -4  -3    7.50    5.40
 -12   4  -3    7.70   10.80
  12   4   3   11.30    6.40
 -13  -4  -3   37.70    7.10
 -13  -4  -3   28.20    8.00
  13  -4   3   37.20   15.30
 -13  -4  -3   36.10    6.80
  13   4   3   34.00    8.00
  13  -5  -3   -4.40   18.10
 -13  -5   3    4.70    5.70
 -13  -5   3   -8.50    8.20
 -13  -5   3    6.20    5.20
  13   5  -3    9.50    6.40
  12  -5  -3  -18.60   19.00
 -12  -5   3    5.00    6.80
 -12  -5   3    8.40    4.70
 -12  -5   3    0.20    5.20
  12   5  -3    8.70    5.80
 -11  -5   3    3.10    4.80
 -11  -5   3    8.40    4.30
 -11  -5   3   10.10    6.00
  11  -5  -3   -0.80   16.60
  11   5  -3   15.70    5.80
 -10  -5   3    3.20    3.90
 -10  -5   3    2.50    4.60
 -10  -5   3    6.70    5.80
  10  -5  -3    2.90   15.00
 -10   5   3  -14.80   14.30
  10   5  -3   12.10    5.10
  -9  -5   3   -2.30    4.70
  -9  -5   3    5.00    3.30
   9  -5  -3    6.10   12.80
  -9  -5   3    5.80    3.60
   9   5  -3    6.80    4.70
  -8  -5   3   42.60    6.60
  -8  -5   3   49.70    7.20
  -8  -5   3   49.10    5.40
   8  -5  -3   25.70   13.10
  -8   5   3   37.90   12.50
   8   5  -3   44.50    7.50
  -7   5   3  105.19   19.40
  -6  -5   3   55.29    7.40
   6  -5  -3   47.40   12.00
  -6   5   3   57.69   12.00
   6   5  -3   44.80    7.20
  -6   5   3   46.40   10.70
   5  -5  -3   20.00    9.60
  -5  -5   3   14.50    3.00
  -5  -5   3   13.30    5.10
   5   5  -3   20.40    4.30
  -5   5   3   -5.10    9.00
  -4  -5   3   45.90    8.30
  -3  -5   3  389.76   26.00
   3  -5  -3  369.86   28.90
  -3  -5   3  339.27   24.90
   3   5  -3  360.86   26.40
   3   5  -3  403.86   25.40
  -3   5   3  386.96   28.10
   2  -5  -3  120.89   15.40
  -2  -5   3   91.49    9.70
  -2   5   3   90.09   13.10
   2   5  -3   99.49    8.90
  -1  -5   3  203.48   15.50
  -1  -5   3  187.88   14.30
   1   5  -3  210.88   14.80
  -1   5   3  227.88   18.30
   0  -5   3  154.18   14.20
   0  -5   3  147.99   10.90
   0   5  -3  153.18   11.20
   0   5   3  117.29   14.30
   0   5   3  128.49   11.20
   1  -5   3   80.79   12.80
   1  -5   3  122.29   16.00
  -1   5  -3   81.49    9.50
  -1   5  -3  115.09   12.10
   1   5   3  127.19   13.00
   1   5   3  110.19    9.90
   1   5   3  110.89    9.20
   2  -5   3    9.10    7.10
   2  -5   3    0.00    8.50
   2  -5   3   -8.00    3.70
  -2  -5  -3    1.50    2.80
   2   5   3    5.50    4.10
   2   5   3    1.10    3.50
  -2   5  -3    6.90    7.50
   2   5   3    0.60    7.50
   3  -5   3  114.79    9.40
  -3  -5  -3   87.89    8.40
   3   5   3  109.39   12.70
   3   5   3   84.09   10.00
   3   5   3   76.19    8.20
   3   5   3   92.59    8.50
  -4  -5  -3  219.78   14.90
  -4  -5  -3  200.38   15.10
   4  -5   3  218.98   21.20
   4   5   3  215.48   18.50
   4   5   3  208.98   15.30
   4   5   3  200.68   14.80
  -4   5  -3  199.88   16.90
  -5  -5  -3   67.79    8.10
  -5  -5  -3   87.99    7.70
  -5  -5  -3   83.19    8.10
   5  -5   3   61.99   11.70
   5   5   3   86.39    7.60
   5   5   3   59.89    7.90
   5   5   3   67.99   12.60
  -5   5  -3   60.59    9.20
  -6  -5  -3   10.10    4.30
  -6  -5  -3   17.30    4.50
   6  -5   3    4.40    9.60
  -6  -5  -3   22.90    4.20
   6   5   3   13.40    4.20
  -6   5  -3   11.80    7.10
   6   5   3    7.00    4.50
   6   5   3   14.60    3.90
   6   5   3   17.10    8.60
  -7  -5  -3   45.60    5.60
   7  -5   3   39.70   11.30
  -7  -5  -3   37.50    5.90
  -7  -5  -3   44.80    6.40
   7   5   3   33.70    6.10
  -7   5  -3   51.69    9.40
   7   5   3   41.30    6.40
   7   5   3   38.70    5.20
  -8  -5  -3    2.30    4.70
  -8  -5  -3   10.50    4.60
  -8  -5  -3    5.20    4.40
   8   5   3   10.60    4.20
  -8   5  -3   11.50    9.40
   8   5   3    0.30    4.80
  -9  -5  -3    5.90    5.70
  -9  -5  -3   15.70    5.00
  -9  -5  -3   21.90    5.40
   9   5   3    8.50    4.70
   9   5   3    0.00    5.10
   9   5   3    8.40    4.70
 -10  -5  -3   27.10    6.50
 -10  -5  -3   33.30    6.50
  10  -5   3   46.70   16.50
 -10  -5  -3   32.20    6.10
  10   5   3   24.90    6.50
 -10   5  -3   66.69   17.30
  10   5   3   25.50    5.80
 -11  -5  -3   50.49    7.40
 -11  -5  -3   34.90    7.60
  11  -5   3   30.10   14.60
 -11  -5  -3   43.80    7.10
 -11   5  -3   53.19   17.10
  11   5   3   33.00    7.20
  11   5   3   47.50    7.80
  12  -5   3   15.90   15.10
 -12  -5  -3   -2.00    6.90
 -12  -5  -3    7.90    6.40
 -12  -5  -3   13.90    6.60
  12   5   3   13.30    7.40
  12   5   3   10.70    7.20
  11  -6  -3   -7.90   20.90
 -11  -6   3   13.60    5.90
 -11  -6   3   11.50    4.70
 -11  -6   3    1.20    6.60
  11   6  -3   11.90    6.30
  10  -6  -3  -22.20   18.60
 -10  -6   3   -5.80    6.30
 -10  -6   3   11.10    4.30
  10   6  -3    7.90    6.00
   9  -6  -3   15.90   17.50
  -9  -6   3   36.20    7.40
  -9  -6   3   38.40    6.30
   9   6  -3   44.80    7.20
  -8  -6   3   82.79   10.80
   8   6  -3   72.59    9.00
  -7  -6   3   15.80    5.60
   7  -6  -3   22.60   14.50
   7   6  -3   15.00    5.30
  -7   6   3   -2.80   13.60
  -6  -6   3   12.70    5.70
   6  -6  -3   20.20   13.70
   6   6  -3    4.70    4.90
  -6   6   3   15.60   12.80
  -5  -6   3  360.36   30.00
   5  -6  -3  324.17   33.60
  -5   6   3  339.67   29.80
   5   6  -3  392.46   25.20
   4  -6  -3  237.58   27.70
  -4  -6   3  237.48   18.80
   3  -6  -3   35.70   12.50
  -3  -6   3   37.70    6.80
  -3   6   3   35.90   11.90
   3   6  -3   33.00    5.90
  -2  -6   3   36.40    6.80
   2   6  -3   37.40    6.20
  -2   6   3   61.69   12.60
  -1  -6   3   45.10    7.40
   1   6  -3   49.70    7.80
  -1   6   3   76.79   14.60
   0  -6   3   94.89   11.10
   0  -6   3  115.89   18.80
   0   6   3   77.59   10.10
   0   6  -3   92.99   10.50
   0   6   3   80.79   14.60
   1  -6   3   60.79   13.30
   1   6   3   58.39    7.70
  -1   6  -3   61.39   11.60
   1   6   3   57.79   11.80
  -1   6  -3   53.59    7.70
  -2  -6  -3  129.39   11.30
   2   6   3  139.99   16.90
   2   6   3  137.99   11.80
  -2   6  -3  159.58   17.50
   3  -6   3   46.70   12.60
  -3  -6  -3   44.10    5.70
   3   6   3   52.99    7.10
   3   6   3   64.09   12.20
  -3   6  -3   45.60   11.90
   4  -6   3   63.69   13.70
  -4  -6  -3   45.10    7.80
   4   6   3   69.99   12.50
  -4   6  -3   60.49    9.80
   4   6   3   45.30   10.50
   5  -6   3   40.20   13.70
  -5  -6  -3   45.30    6.10
   5   6   3   39.00    5.90
   5   6   3   49.70    6.90
  -6  -6  -3   -4.90    4.50
   6   6   3    3.30    4.50
  -6   6  -3    4.90   11.30
   6   6   3    2.30    5.00
   7  -6   3  -15.60   14.60
  -7  -6  -3   14.40    5.40
  -7  -6  -3   11.70    5.50
   7   6   3    6.00   11.70
  -7   6  -3   30.90   10.60
   7   6   3   12.90    5.20
   7   6   3    5.30    5.60
   8  -6   3    2.40   15.50
  -8  -6  -3   -4.50    5.60
  -8  -6  -3   15.40    5.90
  -8  -6  -3    2.70    5.30
   8   6   3    9.70    5.50
   8   6   3   -0.70    6.20
  -9  -6  -3  166.08   14.40
  -9  -6  -3  131.79   13.80
  -9  -6  -3  159.88   13.40
   9  -6   3  110.09   23.60
   9   6   3  154.58   13.70
   9   6   3  137.59   14.30
 -10  -6  -3   72.99   12.10
  10  -6   3   68.69   22.90
 -10  -6  -3  106.49   13.00
 -10  -6  -3  117.19   11.70
  10   6   3   92.59   12.20
 -11  -6  -3   10.10    7.30
 -11  -6  -3   16.50    7.80
  11  -6   3  -21.20   20.30
 -11  -6  -3    7.10    7.10
  11   6   3   12.20    8.90
  11   6   3    9.00    7.50
 -10  -7   3    8.10    8.00
  10  -7  -3   30.10   23.70
  10   7  -3   -3.00    7.10
   9  -7  -3    6.70   20.90
  -9  -7   3   28.60    7.90
   9   7  -3   24.90    7.20
   8  -7  -3   11.40   19.30
  -8  -7   3   14.50    7.20
   8   7  -3   11.60    6.40
   7  -7  -3   17.80   19.10
  -7  -7   3   26.30    7.10
  -7   7   3    0.20   16.30
   7   7  -3    9.80    6.30
   6  -7  -3   23.00   18.80
  -6  -7   3    6.80    6.70
  -6   7   3   28.90   17.20
  -5  -7   3   66.19    9.10
   5  -7  -3   61.89   19.00
  -5   7   3   73.59   18.00
   5   7  -3   70.79    9.30
   4  -7  -3   21.30   15.30
  -4  -7   3   33.50    7.20
  -4   7   3   28.40   15.70
   4   7  -3   32.00    6.80
   3  -7  -3  -14.70   14.80
   3   7  -3    8.80    5.90
  -3   7   3   12.80   13.20
  -2  -7   3   38.50    7.60
  -2   7   3   47.40   14.80
   2   7  -3   34.70    6.80
   1  -7  -3   73.09   15.20
   1   7  -3   16.00    6.70
  -1   7   3   34.70   13.40
   0  -7   3  324.77   31.60
   0   7  -3  284.97   22.00
   0   7   3  237.08   26.00
  -1  -7  -3   72.59    9.20
   1   7   3  122.89   12.60
  -1   7  -3  102.79   18.10
   1   7   3  110.39   18.30
   2  -7   3    6.80   14.70
   2   7   3    2.00    6.70
   2   7   3    9.00   12.20
  -2   7  -3   10.20   12.90
  -3   7  -3   66.29   16.10
   3   7   3   66.79   10.20
   3   7   3   68.89   14.50
  -4  -7  -3   31.70    6.10
   4  -7   3   57.39   17.90
   4   7   3   27.40    7.00
   4   7   3   66.19   14.50
  -4   7  -3   54.79   10.60
  -5  -7  -3   51.09    7.40
   5  -7   3   50.29   18.80
   5   7   3   53.19    8.30
   5   7   3   84.99   15.60
  -5   7  -3   56.89   14.40
  -6  -7  -3    4.50    5.90
   6  -7   3   10.80   19.80
   6   7   3    9.80    6.40
   6   7   3   -7.50   14.60
  -7  -7  -3   90.89   11.90
  -7  -7  -3   78.99   11.50
   7  -7   3   37.20   21.50
   7   7   3   88.59   11.60
  -7   7  -3   91.09   19.20
   8  -7   3    4.40   21.50
  -8  -7  -3    5.60    6.50
  -8  -7  -3    9.60    6.70
   8   7   3   16.20    7.90
  -8   7  -3   15.50   15.30
  -9  -7  -3   17.90    7.30
  -9  -7  -3    3.90    7.40
   9  -7   3   11.20   24.60
   9   7   3   17.80    7.60
   7  -8  -3   17.20   22.80
  -7  -8   3    8.50    7.80
   7   8  -3   -2.20    7.30
  -7   8   3  -14.50   20.60
   6  -8  -3  101.19   23.90
  -6  -8   3   46.30    9.70
  -6   8   3   21.70   21.40
   6   8  -3   45.80    8.40
  -5  -8   3   21.00    8.90
   5  -8  -3    6.40   20.40
  -5   8   3   38.00   19.80
   5   8  -3   34.60    7.80
   4  -8  -3   16.10   19.10
   4   8  -3   -0.80    7.10
  -4   8   3   17.10   18.30
   3  -8  -3   12.80   19.30
  -3  -8   3   12.30    8.10
  -3   8   3    4.60   17.80
   3   8  -3   13.10    7.70
   2  -8  -3   25.20   20.50
  -2  -8   3    5.50    7.60
  -2   8   3    6.70   16.40
   2   8  -3    4.80    8.10
  -1  -8   3   20.40   18.90
   1  -8  -3    9.20   19.60
  -1   8   3  -15.20   16.20
   1   8  -3   38.40   10.00
   0  -8   3    7.50   22.20
   0  -8  -3    0.60   18.00
   0   8   3    6.90   16.30
   0   8  -3   24.60   19.60
   0   8  -3    5.50    9.30
   1  -8   3   38.30   22.40
   1   8   3   28.60    9.20
  -1   8  -3   48.80   21.70
   1   8   3   38.90   17.10
   2  -8   3   41.60   21.50
  -2  -8  -3   20.10    6.10
   2   8   3   32.20    9.90
   2   8   3   37.90   17.00
  -2   8  -3   56.99   22.20
   3  -8   3    9.60   23.80
  -3  -8  -3   -6.10    5.50
   3   8   3   14.10   16.70
  -3   8  -3   -1.40   18.00
   3   8   3   -1.70    8.60
  -4  -8  -3   -3.00    6.30
   4  -8   3    5.70   23.80
   4   8   3    0.90    8.60
   4   8   3    2.50   16.60
   5  -8   3   42.70   22.80
  -5  -8  -3   16.90    7.00
   5   8   3   36.40    8.60
  -6  -8  -3   24.10    7.60
   6  -8   3   21.90   25.60
   6   8   3   40.50    8.80
   1  -9  -3  -12.60   24.80
  -1  -9   3    9.70   28.20
  -1   9   3    3.80   21.60
   1   9  -3  -13.00   12.00
   1   9  -3  -23.30   26.10
   0  -9   3   26.20   27.90
   0  -9  -3   47.00   24.10
   0   9  -3   27.70   28.60
   0   9   3   24.80   22.30
  -1  -9  -3   31.20   23.00
   1  -9   3   82.09   27.10
   1   9   3   24.20   24.70
  15   0  -4   32.20    8.70
 -15   0   4   22.50    9.80
 -15   0   4   26.50    7.80
 -14   0   4   36.20    8.10
  14   0  -4   34.20    8.30
 -14   0   4   37.80    8.00
  13   0  -4   48.90    7.80
 -13   0   4   34.60    7.40
 -13   0   4   32.30    7.30
  12   0  -4   95.89   13.80
 -12   0   4  101.59   13.20
  12   0  -4  110.39   12.20
 -12   0   4   93.79   12.00
  11   0  -4    1.20    8.20
 -11   0   4   -9.30    5.30
  11   0  -4   10.60    5.50
 -11   0   4   -6.20    5.00
  10   0  -4  181.48   15.80
 -10   0   4  169.68   14.00
 -10   0   4  143.29   13.90
   9   0  -4  999.50   65.59
  -9   0   4 1048.20   67.09
   9   0  -4 1014.40   65.29
  -9   0   4  996.60   65.09
  -9   0   4 1035.20   65.09
   9   0  -4  965.70   65.59
  -8   0   4  221.98   15.40
   8   0  -4  221.88   15.90
  -8   0   4  227.58   15.60
   8   0  -4  232.78   16.40
  -8   0   4  189.38   16.30
   8   0  -4  207.28   16.20
   7   0  -4  160.58   12.60
  -7   0   4  160.18   12.00
   7   0  -4  162.08   12.70
   7   0  -4  169.08   12.40
  -7   0   4  154.18   12.70
  -7   0   4  179.38   12.10
  -6   0   4 2776.62  170.78
  -6   0   4 2596.14  170.78
   6   0  -4 2723.73  170.68
  -6   0   4 2747.23  170.68
   6   0  -4 2671.43  170.78
   6   0  -4 2636.74  170.78
  -5   0   4    6.30    2.90
  -5   0   4    6.40    3.20
   5   0  -4    9.10    3.00
  -5   0   4    6.00    2.80
   5   0  -4   10.50    2.60
  -4   0   4    5.20    2.30
  -4   0   4    6.70    2.70
   4   0  -4    8.20    3.10
   4   0  -4    6.10    2.50
   4   0  -4    4.00    2.60
  -4   0   4    5.20    2.70
  -4   0   4    8.30    2.70
  -3   0   4 9999.00  613.54
  -3   0   4 9656.83  613.74
   3   0  -4 9647.83  613.54
   3   0  -4 9537.05  613.54
  -2   0   4  493.25   31.60
   2   0  -4  486.45   31.60
   2   0  -4  494.25   31.60
  -2   0   4  492.15   31.60
   0   0  -4    0.40    1.20
   0   0   4    3.60    1.30
   0   0   4    0.80    1.30
   0   0  -4   -0.30    1.30
  -2   0  -4    9.50    1.40
  -2   0  -4   10.90    1.90
   2   0   4    7.70    1.30
   2   0   4    6.60    1.40
   2   0   4    6.50    1.30
  -2   0  -4    6.50    1.30
   2   0   4    6.30    1.20
   2   0   4    9.60    1.50
  -2   0  -4    7.10    1.20
   2   0   4    5.90    1.30
  -3   0  -4   79.99    5.70
   3   0   4   86.29    5.70
   3   0   4   88.89    5.70
   3   0   4   78.89    5.60
   3   0   4   73.59    5.60
  -3   0  -4   72.79    5.80
  -3   0  -4   73.29    5.80
  -3   0  -4   80.09    5.60
   4   0   4   -0.90    1.40
   4   0   4    0.30    1.60
  -4   0  -4   -0.40    1.30
   4   0   4   -0.50    1.90
  -4   0  -4   -0.20    1.90
  -4   0  -4   -1.40    1.50
  -4   0  -4    0.10    1.30
   4   0   4    3.50    1.80
  -5   0  -4 1010.50   65.99
   5   0   4 1024.80   66.09
   5   0   4 1035.10   65.99
   5   0   4 1084.49   66.19
  -5   0  -4 1031.00   65.99
  -5   0  -4 1020.10   66.09
  -5   0  -4 1045.90   66.19
   5   0   4 1047.80   65.99
  -6   0  -4  715.03   49.60
   6   0   4  783.12   49.50
   6   0   4  790.72   49.50
  -6   0  -4  809.02   49.30
   6   0   4  797.02   49.40
   6   0   4  775.32   49.40
  -6   0  -4  735.83   49.30
  -6   0  -4  762.82   49.30
   7   0   4  346.27   22.30
  -7   0  -4  297.37   22.50
   7   0   4  344.57   22.30
  -7   0  -4  356.76   22.00
  -7   0  -4  357.96   22.00
  -7   0  -4  321.87   22.00
   7   0   4  318.57   22.60
   7   0   4  326.37   22.40
   8   0   4   28.50    4.70
  -8   0  -4   32.70    4.50
  -8   0  -4   27.40    3.50
  -8   0  -4   20.80    3.60
   8   0   4   29.70    4.60
   8   0   4   19.60    4.60
   8   0   4   25.70    4.10
  -8   0  -4   20.10    4.80
  -9   0  -4  770.52   48.70
   9   0   4  809.92   49.10
   9   0   4  694.73   49.30
  -9   0  -4  690.83   48.70
  -9   0  -4  801.62   48.70
   9   0   4  754.72   49.30
 -10   0  -4   45.10    7.00
  10   0   4   38.60    7.60
 -10   0  -4   41.90    6.70
  10   0   4   44.90    6.40
  10   0   4   68.49   10.50
 -10   0  -4   40.80    6.50
  11   0   4  528.55   36.80
 -11   0  -4  546.75   35.90
  11   0   4  547.05   38.20
 -11   0  -4  555.94   36.10
 -12   0  -4    5.00    5.20
  12   0   4    5.00    5.80
 -12   0  -4   -1.80    5.30
  13   0   4   -0.40    6.50
 -13   0  -4    7.20    6.30
 -13   0  -4    2.90    6.50
 -13   0  -4    4.30    5.10
  14   0   4   30.70    8.40
 -14   0  -4   16.70   10.90
 -14   0  -4   36.40    7.20
 -15   0  -4   -6.50    6.90
  15   0   4   -0.50    8.40
 -15  -1   4   10.40    7.70
 -15  -1   4   21.00    6.90
 -15  -1   4   -5.50    8.10
  15  -1  -4   14.00    9.00
  15   1  -4   14.40    7.70
 -15   1   4   15.50    9.00
 -14  -1   4    4.50    6.10
 -14  -1   4   -6.00    6.50
  14  -1  -4    7.50    8.80
  14   1  -4    7.30    7.40
 -14   1   4   15.00    7.70
 -14   1   4   10.90    9.30
  13  -1  -4   16.70    8.20
 -13  -1   4    8.30    5.50
 -13  -1   4    9.80    5.80
 -13   1   4   11.00    6.40
  13   1  -4   17.80    6.70
 -13   1   4   19.60    7.70
  12  -1  -4   36.90   11.50
 -12  -1   4   40.40    6.60
 -12  -1   4   44.00    6.60
  12  -1  -4   31.80    8.50
 -12  -1   4   46.10    6.70
  12   1  -4   57.29    9.90
 -12   1   4   38.90    7.30
 -12   1   4   40.20    7.70
 -11  -1   4  466.05   29.00
  11  -1  -4  423.16   32.80
  11  -1  -4  381.56   31.60
 -11  -1   4  435.16   29.00
 -11  -1   4  417.86   29.10
 -11   1   4  389.26   29.40
 -11   1   4  373.66   29.70
  11   1  -4  494.95   29.30
  10  -1  -4   31.50    8.50
  10  -1  -4   20.40    8.20
 -10  -1   4   28.50    5.40
 -10  -1   4   31.20    5.10
  10  -1  -4   41.90    7.60
 -10   1   4   34.90    6.30
 -10   1   4   33.00    6.50
  10   1  -4   15.10    7.00
  10   1  -4   31.70    7.00
  -9  -1   4  798.82   48.70
   9  -1  -4  731.73   49.70
  -9  -1   4  792.42   48.90
  -9  -1   4  679.53   49.40
   9  -1  -4  747.83   49.50
  -9  -1   4  793.82   48.70
   9  -1  -4  693.13   49.50
  -9   1   4  694.63   49.00
   9   1  -4  789.42   48.70
  -9   1   4  729.43   48.80
   9   1  -4  750.82   49.20
   9   1  -4  797.12   49.70
   8  -1  -4  203.48   16.50
  -8  -1   4  219.28   15.60
  -8  -1   4  213.38   15.70
  -8  -1   4  225.38   15.30
  -8  -1   4  229.18   15.50
   8  -1  -4  206.78   16.40
   8  -1  -4  217.18   16.50
   8   1  -4  222.08   16.50
  -8   1   4  209.38   15.60
   8   1  -4  203.08   15.90
  -8   1   4  220.98   15.80
   8   1  -4  226.48   15.20
   8   1  -4  215.58   15.90
  -7  -1   4  146.79   10.70
   7  -1  -4  141.49   11.70
  -7  -1   4  145.09   11.10
   7  -1  -4  154.68   12.60
  -7  -1   4  151.88   11.00
  -7  -1   4  137.99   10.80
   7   1  -4  140.29   11.40
  -7   1   4  148.79   11.40
   7   1  -4  161.68   10.60
   7   1  -4  140.99   11.60
   7   1  -4  136.39   11.30
  -7   1   4  123.59   12.80
  -6  -1   4   92.59    7.50
   6  -1  -4   95.49    8.10
   6   1  -4   72.79    6.90
   6   1  -4   85.29    7.80
  -6   1   4   95.89    8.00
   5  -1  -4  189.98   14.10
  -5  -1   4  196.08   13.50
  -5  -1   4  195.58   14.00
   5  -1  -4  213.68   14.50
   5  -1  -4  211.88   14.30
  -5  -1   4  212.98   13.70
  -5  -1   4  213.28   13.70
   5   1  -4  167.88   14.00
   5   1  -4  179.18   13.80
   5   1  -4  192.98   13.30
  -5   1   4  206.68   14.20
  -5   1   4  227.48   14.80
   5   1  -4  184.68   13.80
  -5   1   4  197.58   14.10
   4  -1  -4  468.85   28.00
  -4  -1   4  416.66   27.20
   4  -1  -4  434.06   27.70
  -4  -1   4  456.55   27.50
  -4  -1   4  441.86   27.50
   4  -1  -4  424.46   27.70
  -4  -1   4  413.56   27.70
   4   1  -4  407.66   27.50
  -4   1   4  423.66   27.70
   4   1  -4  390.86   27.50
  -4   1   4  414.56   27.80
   4   1  -4  383.86   27.70
   3  -1  -4  770.62   50.19
  -3  -1   4  764.82   50.29
   3  -1  -4  782.12   50.19
  -3  -1   4  813.92   50.09
   3  -1  -4  878.61   51.09
  -3  -1   4  780.12   49.99
  -3   1   4  822.12   50.29
  -3   1   4  798.32   50.29
  -3   1   4  689.53   50.59
   3   1  -4  739.23   50.19
   2  -1  -4 4976.80  312.37
   2  -1  -4 4800.02  312.17
  -2  -1   4 4882.81  312.07
  -2  -1   4 4932.31  312.07
   2  -1  -4 4896.41  312.17
  -2   1   4 4905.91  312.17
  -2   1   4 4852.81  312.17
   2   1  -4 5125.09  312.07
   2   1  -4 5065.59  312.07
   1  -1  -4 2093.59  135.49
   1  -1  -4 2067.99  135.49
  -1   1   4 2076.19  135.49
  -1   1   4 2089.59  135.49
   1   1  -4 2071.99  135.29
   1   1  -4 2438.86  135.39
   1   1   4 5469.05  341.97
   1   1   4 5468.15  341.97
   1   1   4 5297.17  341.97
  -2  -1  -4  517.85   31.70
  -2  -1  -4  486.35   31.70
  -2  -1  -4  494.05   31.70
   2  -1   4  508.95   31.80
  -2  -1  -4  495.35   31.70
   2  -1   4  534.55   32.10
  -2   1  -4  432.26   31.90
   2   1   4  508.75   31.70
   2   1   4  501.85   31.80
   2   1   4  511.65   31.70
   2   1   4  463.15   31.70
  -3  -1  -4 2758.62  165.78
   3  -1   4 2530.25  165.68
   3  -1   4 2456.35  165.58
  -3  -1  -4 2579.94  165.78
   3  -1   4 2429.46  165.58
   3  -1   4 2476.05  165.58
   3  -1   4 2429.56  165.78
  -3  -1  -4 2762.02  165.78
  -3  -1  -4 2385.36  165.68
   3  -1   4 2740.83  165.78
   3   1   4 2561.84  165.78
   3   1   4 2451.55  165.58
   3   1   4 2854.71  165.78
  -3   1  -4 2222.08  165.58
   3   1   4 2823.02  165.68
  -3   1  -4 2755.22  165.88
   3   1   4 2838.62  165.78
   3   1   4 2948.70  165.68
   3   1   4 2760.92  165.88
   4  -1   4  537.55   35.30
   4  -1   4  606.14   35.40
  -4  -1  -4  534.95   35.20
  -4  -1  -4  524.45   35.20
  -4  -1  -4  605.34   35.20
  -4  -1  -4  584.94   35.20
   4  -1   4  546.65   35.10
   4  -1   4  529.15   35.00
   4   1   4  548.95   35.40
   4   1   4  594.04   35.20
   4   1   4  606.74   35.20
  -4   1  -4  494.95   35.00
   4   1   4  509.55   35.10
  -4   1  -4  532.05   35.20
  -4   1  -4  511.75   35.40
   4   1   4  558.54   35.30
  -4   1  -4  503.35   35.00
  -5  -1  -4  104.69    7.30
   5  -1   4  104.19    7.60
   5  -1   4   92.09    7.30
   5  -1   4   96.89    7.50
  -5  -1  -4   94.99    7.40
  -5  -1  -4  112.39    7.20
   5  -1   4   95.69    7.80
  -5  -1  -4   98.79    7.40
   5   1   4   97.49    7.60
   5   1   4   98.89    7.40
   5   1   4   97.69    7.00
  -5   1  -4   91.39    7.10
   5   1   4  112.29    7.40
   5   1   4  105.19    8.10
  -5   1  -4   80.29    8.20
   5   1   4  102.79    7.30
  -6  -1  -4 1578.04   99.69
   6  -1   4 1506.05   99.59
   6  -1   4 1572.24   99.69
  -6  -1  -4 1551.14   99.69
   6  -1   4 1563.24   99.79
  -6  -1  -4 1659.63   99.59
  -6  -1  -4 1646.44   99.59
  -6   1  -4 1512.45   99.49
   6   1   4 1597.74   99.59
   6   1   4 1514.95   99.79
  -6   1  -4 1493.75  100.09
  -6   1  -4 1534.65   99.39
  -6   1  -4 1515.65   99.59
   6   1   4 1646.24   99.69
   6   1   4 1614.74   99.59
   7  -1   4    9.90    3.60
   7  -1   4   10.90    3.50
  -7  -1  -4    7.30    2.40
  -7  -1  -4    5.90    2.60
   7  -1   4    9.70    3.40
  -7  -1  -4   13.70    3.30
  -7  -1  -4   12.30    2.90
  -7   1  -4    8.70    4.90
  -7   1  -4    7.10    3.50
   7   1   4    8.40    3.00
  -7   1  -4    7.50    2.50
   7   1   4    3.20    3.70
  -7   1  -4    6.60    2.40
   7   1   4   10.20    3.00
   7   1   4    8.30    3.20
   8  -1   4   -1.60    3.80
   8  -1   4    7.40    4.00
  -8  -1  -4    1.20    2.50
  -8  -1  -4    2.20    2.70
  -8  -1  -4    7.50    3.10
   8  -1   4    7.30    4.00
   8   1   4   -3.20    3.60
   8   1   4    3.30    4.10
  -8   1  -4    3.00    2.50
  -8   1  -4    5.80    2.90
  -8   1  -4   -1.10    4.10
   8   1   4   10.20    3.90
  -8   1  -4   -5.10    6.00
   8   1   4    3.00    3.20
  -9  -1  -4   19.20    3.60
  -9  -1  -4   20.30    3.90
   9  -1   4   21.50    6.10
  -9  -1  -4   22.30    4.20
   9  -1   4   23.80    5.10
   9  -1   4   18.20    5.70
  -9   1  -4   20.70    5.90
  -9   1  -4   16.70    4.10
  -9   1  -4   23.10    4.80
   9   1   4   27.00    5.40
   9   1   4   18.90    4.40
  -9   1  -4   14.60    3.60
  10  -1   4   44.00    8.10
 -10  -1  -4   34.00    5.20
 -10  -1  -4   33.20    5.50
  10  -1   4   58.69    9.00
 -10  -1  -4   49.90    7.60
  10  -1   4   42.80    8.20
 -10   1  -4   55.59   10.10
 -10   1  -4   43.10    6.80
 -10   1  -4   31.80    5.20
  10   1   4   45.70    7.50
  10   1   4   48.50    8.40
  11  -1   4    3.00    8.80
 -11  -1  -4    0.90    3.90
 -11  -1  -4   -6.30    4.30
 -11  -1  -4    5.00    4.50
  11  -1   4    9.60    5.70
  11  -1   4   10.70    7.30
 -11   1  -4    1.70    7.00
  11   1   4   20.50    7.90
 -11   1  -4    3.20    4.20
 -11   1  -4   -5.00    4.00
  11   1   4    1.00    5.00
 -12  -1  -4  404.36   26.50
  12  -1   4  372.36   28.10
 -12  -1  -4  365.16   26.70
 -12  -1  -4  376.76   26.70
 -12   1  -4  357.56   26.30
 -12   1  -4  344.97   26.40
  12   1   4  439.16   28.10
 -12   1  -4  430.26   28.50
 -13  -1  -4    1.90    5.80
 -13  -1  -4    2.10    6.40
  13  -1   4    0.60    7.40
 -13  -1  -4   -4.00    5.00
 -13   1  -4    0.40    9.10
  13   1   4   -0.90    5.20
  13   1   4    4.10    6.60
 -13   1  -4   -2.10    5.50
 -14  -1  -4   64.89   10.30
  14  -1   4   60.19    9.50
 -14  -1  -4   36.10    8.90
 -14  -1  -4   58.59    8.80
  14   1   4   61.69    9.60
  14   1   4   56.49    8.10
 -14   1  -4   70.19   11.10
 -15  -1  -4   -0.30    8.70
 -15  -1  -4    0.80    6.60
  15  -1   4    6.90    8.70
  15   1   4    8.30    7.90
  15   1   4   -5.20    9.80
  15   1   4    4.70    6.80
 -15   1  -4    7.20    7.60
 -15  -2   4   -5.50    9.00
 -15  -2   4   10.00    6.20
 -15  -2   4    5.00    7.80
  15  -2  -4    8.30   11.20
  15   2  -4    9.30    6.60
 -15   2   4   35.40   10.50
  15   2  -4   -1.00    7.60
 -14  -2   4   96.79   11.50
 -14  -2   4   74.99   13.60
 -14  -2   4   97.39   10.60
  14  -2  -4   83.29   14.10
  14   2  -4   98.39   13.80
 -14   2   4   62.49   11.30
 -13  -2   4   30.40    5.90
  13  -2  -4   22.70   10.20
 -13  -2   4   24.40    7.60
 -13  -2   4   34.70    6.00
 -13   2   4   33.80    8.20
  13   2  -4   35.60    7.20
  12  -2  -4   -1.40    9.20
 -12  -2   4   -2.70    4.20
 -12  -2   4    2.20    5.60
 -12  -2   4    1.40    4.70
 -12   2   4    2.70    6.40
 -12   2   4    3.00    6.80
  12   2  -4   12.00    5.40
 -11  -2   4  324.37   21.40
 -11  -2   4  313.27   21.40
  11  -2  -4  264.77   25.60
  11  -2  -4  292.97   25.70
  11  -2  -4  273.07   27.80
 -11  -2   4  325.87   22.20
 -11   2   4  291.47   22.90
 -11   2   4  268.77   22.70
  11   2  -4  345.77   21.80
 -10  -2   4  507.25   31.70
  10  -2  -4  492.15   34.60
 -10  -2   4  503.85   32.40
  10  -2  -4  407.06   34.50
  10  -2  -4  419.16   35.10
 -10  -2   4  485.35   31.70
 -10   2   4  459.85   33.00
  10   2  -4  505.05   31.80
 -10   2   4  466.65   32.60
  -9  -2   4   53.09    8.00
  -9  -2   4   50.09    6.60
  -9  -2   4   40.50    6.00
   9  -2  -4   35.80    7.80
  -9   2   4   31.80    6.50
   9   2  -4   41.40    6.70
  -9   2   4   43.50    9.30
  -8  -2   4   45.00    5.00
   8  -2  -4   37.40    6.80
  -8  -2   4   37.90    4.80
  -8  -2   4   41.50    6.30
   8  -2  -4   39.40    7.50
   8  -2  -4   42.50    6.90
  -8  -2   4   39.80    7.00
   8   2  -4   45.10    5.70
  -8   2   4   37.30    8.80
   8   2  -4   31.90    5.90
   8   2  -4   29.20    5.50
  -8   2   4   46.30    8.30
  -8   2   4   41.30    6.20
   8   2  -4   36.80    6.40
  -8   2   4   48.20    6.20
  -7  -2   4   74.19    8.50
   7  -2  -4   98.69   11.00
  -7  -2   4   90.89    7.50
  -7  -2   4   96.99    7.40
   7  -2  -4   78.49    9.40
   7  -2  -4   87.69    9.90
  -7  -2   4   91.59    7.70
   7   2  -4   80.59    9.10
  -7   2   4  101.59    9.00
   7   2  -4   87.39    8.40
  -7   2   4   70.49    9.90
  -7   2   4   81.19    8.70
  -7   2   4   82.69   10.20
   7   2  -4   83.99    7.30
   7   2  -4   88.29    8.20
   6  -2  -4  100.59   10.70
  -6  -2   4  103.29    7.70
   6  -2  -4   89.19    9.00
  -6  -2   4   95.99    7.70
  -6  -2   4   99.59    8.70
   6  -2  -4   90.49    9.60
  -6  -2   4  104.39    7.60
  -6   2   4  103.19   10.30
  -6   2   4   82.09    8.90
   6   2  -4  107.79    8.30
   6   2  -4   88.19    7.50
  -6   2   4   93.89    9.70
  -6   2   4   87.09    8.80
   6   2  -4  108.79    9.30
   6   2  -4  105.99    8.40
  -5  -2   4 2942.61  201.98
   5  -2  -4 3158.38  202.38
  -5  -2   4 3233.18  202.58
   5  -2  -4 3074.79  202.38
  -5  -2   4 3149.98  202.08
   5  -2  -4 3333.57  202.98
  -5  -2   4 3192.98  202.08
   5   2  -4 3352.46  202.28
   5   2  -4 2929.81  201.98
  -5   2   4 3456.95  202.38
   5   2  -4 3217.78  202.68
   5   2  -4 3153.38  201.98
  -5   2   4 3396.56  202.48
  -5   2   4 3388.66  202.78
  -5   2   4 2830.02  202.68
   5   2  -4 3267.97  202.28
  -4  -2   4   42.90    4.00
  -4  -2   4   29.70    3.40
  -4  -2   4   43.30    5.40
  -4  -2   4   40.60    3.80
   4  -2  -4   29.90    5.10
   4  -2  -4   41.10    6.70
   4  -2  -4   34.70    4.30
  -4   2   4   35.30    4.60
   4   2  -4   39.70    4.40
  -4   2   4   35.10    4.80
   4   2  -4   36.40    4.70
   4   2  -4   35.70    3.50
  -4   2   4   48.80    6.60
   4   2  -4   32.70    5.30
  -4   2   4   35.30    5.10
   3  -2  -4 1085.89   70.89
  -3  -2   4 1076.09   71.09
   3  -2  -4 1065.09   71.39
   3  -2  -4 1101.29   70.89
   3  -2  -4 1068.09   71.29
  -3   2   4 1152.28   70.99
   3   2  -4 1148.89   70.59
  -3   2   4 1086.79   71.39
   3   2  -4 1163.08   70.69
  -3   2   4 1113.59   70.99
   3   2  -4 1163.08   70.69
  -2  -2   4  234.58   16.60
   2  -2  -4  227.78   16.30
  -2  -2   4  268.27   15.80
   2  -2  -4  248.38   17.20
   2  -2  -4  231.48   17.10
   2  -2  -4  219.28   16.10
  -2   2   4  249.88   16.50
   2   2  -4  276.57   15.90
  -2   2   4  235.98   16.40
  -2   2   4  239.38   17.30
   1  -2  -4  674.83   46.30
   1  -2  -4  730.33   46.70
   1  -2  -4  729.33   46.10
   1  -2  -4  705.13   46.00
  -1  -2   4  746.33   45.90
  -1  -2   4  817.12   46.50
  -1   2   4  707.63   46.80
  -1   2   4  680.33   46.10
  -1   2   4  698.93   46.10
   0   2   4 6744.33  424.96
   0   2   4 6812.42  425.46
   0   2   4 6501.75  424.86
   0   2   4 6839.52  424.86
  -1  -2  -4  495.05   30.90
   1  -2   4  451.55   30.80
  -1  -2  -4  516.15   30.80
  -1  -2  -4  486.85   30.90
   1  -2   4  475.65   31.00
  -1  -2  -4  484.25   30.80
  -1  -2  -4  509.05   31.00
   1   2   4  486.65   30.80
   1   2   4  462.65   31.00
  -1   2  -4  469.75   30.90
   1   2   4  499.55   30.90
   1   2   4  468.35   30.90
  -1   2  -4  460.05   30.80
   1   2   4  463.95   30.90
  -2  -2  -4  344.37   22.80
   2  -2   4  401.96   22.80
  -2  -2  -4  343.97   22.70
  -2  -2  -4  355.46   22.80
   2  -2   4  360.26   23.10
  -2  -2  -4  342.97   22.80
   2  -2   4  388.26   23.70
   2   2   4  345.77   22.90
   2   2   4  338.07   22.70
   2   2   4  359.46   22.80
  -2   2  -4  315.37   22.90
   2   2   4  370.96   23.00
   2   2   4  354.36   22.70
   2   2   4  311.27   22.90
   3  -2   4 5496.55  325.87
  -3  -2  -4 5160.98  325.97
   3  -2   4 5714.03  326.67
  -3  -2  -4 4955.80  325.97
  -3  -2  -4 5079.89  325.87
  -3  -2  -4 5056.99  325.97
   3  -2   4 4872.31  326.07
   3   2   4 5248.17  325.97
   3   2   4 5128.09  326.07
   3   2   4 5307.87  325.87
   3   2   4 5170.48  325.97
   3   2   4 5303.27  325.97
   3   2   4 5221.08  325.87
  -3   2  -4 4463.15  325.97
  -4  -2  -4   -0.30    2.00
  -4  -2  -4   -3.00    1.80
  -4  -2  -4    0.80    1.70
   4  -2   4    5.60    5.00
   4  -2   4    3.00    2.80
   4  -2   4   -6.20    3.50
   4   2   4   -3.70    1.90
   4   2   4   -0.80    1.60
   4   2   4   -3.90    1.70
   4   2   4   -0.70    2.30
   4   2   4   -3.90    1.60
  -4   2  -4   -5.40    2.70
  -5  -2  -4   14.20    2.60
  -5  -2  -4   13.20    2.60
  -5  -2  -4   16.30    2.70
  -5  -2  -4   19.10    3.00
   5  -2   4   19.70    5.20
   5   2   4   17.30    2.80
   5   2   4   17.80    3.40
   5   2   4   15.90    2.70
   5   2   4   12.00    2.60
   5   2   4   14.90    2.50
  -5   2  -4   15.20    4.20
  -5   2  -4   18.40    3.50
   6  -2   4   36.50    6.00
   6  -2   4   20.50    3.70
  -6  -2  -4   17.30    3.20
  -6  -2  -4   21.50    3.80
  -6  -2  -4   25.60    4.60
   6  -2   4   36.70    6.40
  -6  -2  -4   19.60    3.20
  -6   2  -4   27.00    4.30
   6   2   4   19.50    3.60
   6   2   4   16.70    3.40
  -6   2  -4   24.40    5.30
  -6   2  -4   18.80    2.90
   6   2   4   20.30    3.20
   6   2   4   24.50    4.00
   6   2   4   27.50    3.60
   6   2   4   23.60    4.00
  -7  -2  -4  465.55   30.10
  -7  -2  -4  443.26   30.30
   7  -2   4  458.95   31.10
  -7  -2  -4  473.55   30.10
   7  -2   4  402.46   30.50
  -7  -2  -4  476.95   30.40
  -7   2  -4  461.25   30.70
   7   2   4  500.85   30.80
  -7   2  -4  398.26   30.00
   7   2   4  500.35   30.00
   7   2   4  498.25   30.40
   7   2   4  495.05   30.40
  -7   2  -4  450.25   30.00
   7   2   4  494.75   30.20
   7   2   4  416.86   30.80
  -8  -2  -4  152.98   11.00
   8  -2   4  133.09   13.10
   8  -2   4  137.89   12.20
   8  -2   4  120.39   12.20
  -8  -2  -4  157.68   11.60
  -8  -2  -4  156.38   10.90
  -8   2  -4  133.29   12.80
   8   2   4  168.68   10.80
  -8   2  -4  137.99   10.90
   8   2   4  160.58   11.70
   8   2   4  155.68   12.10
  -9  -2  -4   35.00    5.30
  -9  -2  -4   30.20    4.80
   9  -2   4   50.79    9.20
   9  -2   4   27.50    7.20
   9  -2   4   27.40    6.60
  -9  -2  -4   37.10    5.60
   9   2   4   34.60    5.60
   9   2   4   36.10    5.50
   9   2   4   40.40    6.60
  -9   2  -4   39.90    5.90
  -9   2  -4   36.20    7.50
  -9   2  -4   33.20    4.80
 -10  -2  -4   30.20    5.40
 -10  -2  -4   26.20    4.90
  10  -2   4   29.90    8.90
  10  -2   4   29.70    7.20
  10  -2   4   32.60    7.50
 -10  -2  -4   23.70    4.40
 -10   2  -4   24.70    4.90
  10   2   4   33.70    5.00
 -10   2  -4   30.30    4.80
 -10   2  -4   23.10    7.80
  11  -2   4   -4.80    6.50
 -11  -2  -4    0.70    3.70
 -11  -2  -4   -4.40    4.10
 -11  -2  -4   -0.50    4.50
  11  -2   4   -0.10   10.30
  11   2   4   -3.70    3.90
 -11   2  -4    3.60    4.70
 -11   2  -4    6.70    4.30
  11   2   4    0.10    5.30
  12  -2   4   88.89   11.70
 -12  -2  -4   74.89    9.50
 -12  -2  -4   93.19   11.50
 -12  -2  -4   80.59    9.20
 -12   2  -4   86.29   14.50
 -12   2  -4   64.29    9.80
  12   2   4   95.69   12.40
  12   2   4   80.79   10.20
 -13  -2  -4  150.88   13.80
 -13  -2  -4  168.08   14.90
  13  -2   4  145.69   17.30
 -13   2  -4  143.29   14.30
  13   2   4  157.48   14.30
  13   2   4  161.28   13.50
  13   2   4  177.08   16.70
  14  -2   4   18.70    8.60
 -14  -2  -4    8.30    6.80
 -14  -2  -4   10.80    5.80
 -14  -2  -4    3.00    7.00
  14   2   4    2.20    7.10
 -14   2  -4   14.10    6.60
  14   2   4   14.90    6.60
  14   2   4   12.10    8.50
 -15  -3   4   11.10    7.10
 -15  -3   4   -8.10   10.60
 -15  -3   4   12.80    7.40
  15   3  -4    2.10    6.70
  15   3  -4   26.40    9.60
 -14  -3   4   28.50    8.70
 -14  -3   4   38.00    7.10
  14  -3  -4   26.40   13.70
 -14  -3   4   35.50    6.40
  14   3  -4   29.30    6.60
  14   3  -4   41.50    8.50
 -14   3   4   34.20    9.90
 -13  -3   4   19.70    5.90
 -13  -3   4   16.60    7.80
 -13  -3   4   22.40    5.10
  13  -3  -4   18.90   12.10
  13   3  -4   14.60    6.90
 -13   3   4    5.90    8.50
  13   3  -4   19.10    5.70
 -12  -3   4    2.80    4.40
 -12  -3   4   -4.60    6.00
 -12  -3   4    1.00    3.90
  12  -3  -4    0.30   11.20
  12   3  -4    0.20    4.30
  12   3  -4    9.40    5.90
 -12   3   4    4.40    7.10
  11  -3  -4   -4.60   11.90
 -11  -3   4    3.30    5.20
 -11  -3   4    3.60    5.40
  11  -3  -4   21.60   11.30
 -11  -3   4    8.90    3.90
 -11   3   4   15.90   13.20
  11   3  -4   10.70    4.20
 -11   3   4   13.90    7.40
 -11   3   4   22.20    8.50
  11   3  -4   20.10    5.50
 -10  -3   4  121.19   11.70
 -10  -3   4  111.39   11.40
  10  -3  -4  123.19   17.10
  10  -3  -4  135.39   17.90
 -10  -3   4   99.69    9.90
  10   3  -4  133.59   11.70
 -10   3   4  111.49   12.80
   9  -3  -4   44.20    9.80
  -9  -3   4   53.09    6.80
  -9  -3   4   56.79    6.70
   9  -3  -4   44.00    9.10
   9   3  -4   65.79    6.70
  -9   3   4   39.80    7.90
  -9   3   4   51.49    8.10
   9   3  -4   75.59    8.90
  -8  -3   4   50.49    6.80
  -8  -3   4   50.79    6.00
   8  -3  -4   47.40   11.90
   8  -3  -4   81.49   12.70
   8  -3  -4   57.19    8.30
  -8  -3   4   54.29    6.00
   8  -3  -4   56.29    7.90
  -8  -3   4   59.19    8.20
  -8   3   4   73.39    8.70
   8   3  -4   38.90    7.50
  -8   3   4   62.39    9.00
   8   3  -4   55.19    5.90
  -8   3   4   75.49   12.20
  -7  -3   4   24.80    5.10
  -7  -3   4   32.00    4.20
   7  -3  -4   16.20    5.00
   7  -3  -4   29.30    7.50
  -7  -3   4   29.80    4.30
   7  -3  -4   20.90    8.20
   7  -3  -4   28.50    5.90
  -7  -3   4   22.50    3.50
  -7   3   4   28.70    7.40
   7   3  -4   28.90    3.80
   7   3  -4   36.20    7.00
   7   3  -4   21.00    4.70
  -7   3   4   27.30    5.60
   7   3  -4   23.60    7.00
  -7   3   4   23.10    5.50
   7   3  -4   23.30    4.30
   6  -3  -4   12.70    4.80
  -6  -3   4   24.60    3.40
   6  -3  -4   24.90    7.40
  -6  -3   4   26.70    3.30
   6  -3  -4   19.50    6.80
   6  -3  -4   25.80    5.00
  -6  -3   4   21.10    3.50
  -6  -3   4   24.90    4.70
  -6   3   4   20.70    6.20
   6   3  -4   28.50    5.10
   6   3  -4   21.80    3.80
   6   3  -4   27.60    4.10
  -6   3   4   14.80    5.90
  -6   3   4   23.20    5.20
   6   3  -4   28.10    4.50
  -6   3   4   22.60    6.30
  -6   3   4   18.10    4.90
   6   3  -4   23.00    3.40
   5  -3  -4   23.80    7.30
  -5  -3   4   27.50    3.50
  -5  -3   4   25.20    3.80
   5  -3  -4   26.70    6.70
  -5  -3   4   33.70    4.90
  -5  -3   4   35.50    3.70
   5  -3  -4   41.80    6.50
   5   3  -4   29.60    5.00
  -5   3   4   30.50    5.40
  -5   3   4   35.20    6.40
   5   3  -4   27.10    3.90
   5   3  -4   36.90    4.30
  -5   3   4   36.40    6.20
  -5   3   4   32.30    6.90
   5   3  -4   43.20    4.70
  -5   3   4   34.90    6.00
   4  -3  -4 1026.50   71.89
   4  -3  -4 1039.50   70.99
  -4  -3   4 1111.29   71.49
  -4  -3   4  958.00   70.59
   4  -3  -4 1188.78   72.39
  -4   3   4 1180.88   71.69
  -4   3   4 1201.38   71.29
   4   3  -4 1146.99   70.89
  -4   3   4 1104.19   71.89
   4   3  -4 1079.59   71.49
   4   3  -4 1198.58   70.89
   4   3  -4 1106.59   70.89
   3  -3  -4  400.26   29.40
   3  -3  -4  415.36   28.20
  -3  -3   4  434.46   28.70
  -3  -3   4  440.06   27.90
   3  -3  -4  444.76   28.40
   3  -3  -4  419.36   29.50
   3   3  -4  463.35   28.10
  -3   3   4  411.66   29.50
  -3   3   4  455.95   28.50
   2  -3  -4  396.16   28.60
  -2  -3   4  462.45   28.10
   2  -3  -4  396.76   27.50
   2  -3  -4  419.76   28.90
  -2  -3   4  430.96   27.30
   2  -3  -4  400.16   27.60
  -2   3   4  410.76   27.70
  -2   3   4  400.46   28.80
   2   3  -4  489.25   27.60
   1  -3  -4   34.00    4.40
   1  -3  -4   42.50    6.10
   1  -3  -4   40.00    4.70
  -1   3   4   43.00    7.10
  -1   3   4   42.50    5.10
   0  -3  -4  612.84   38.40
   0  -3  -4  569.34   38.50
   0  -3   4  642.94   38.90
   0  -3  -4  599.74   38.30
   0  -3   4  667.23   38.40
   0   3   4  558.84   38.50
   0   3   4  593.74   38.20
   0   3   4  568.04   38.40
   0   3   4  582.04   39.50
   0   3   4  582.94   38.40
   1  -3   4  538.15   34.40
  -1  -3  -4  530.35   34.30
  -1  -3  -4  510.85   34.40
  -1  -3  -4  560.24   34.30
  -1  -3  -4  529.95   34.40
   1   3   4  554.34   34.60
   1   3   4  518.05   34.40
   1   3   4  547.65   34.30
   1   3   4  544.95   34.20
  -1   3  -4  548.95   34.40
   1   3   4  515.05   35.30
   1   3   4  519.05   34.40
   1   3   4  525.35   34.40
   2  -3   4  253.07   16.70
   2  -3   4  258.27   17.20
  -2  -3  -4  232.88   16.60
   2  -3   4  261.27   18.30
  -2  -3  -4  233.48   16.50
  -2  -3  -4  261.47   16.60
  -2  -3  -4  245.78   16.50
   2   3   4  248.08   17.90
   2   3   4  280.07   17.10
   2   3   4  245.28   16.50
   2   3   4  236.58   16.70
   2   3   4  271.67   16.40
  -2   3  -4  245.38   16.90
   2   3   4  228.88   16.60
  -3  -3  -4  367.86   23.60
  -3  -3  -4  365.36   23.30
  -3  -3  -4  382.76   23.70
  -3  -3  -4  370.36   23.60
  -3  -3  -4  344.07   23.70
   3   3   4  367.46   23.60
   3   3   4  351.26   23.50
   3   3   4  364.06   23.60
   3   3   4  360.26   23.30
   3   3   4  325.87   23.30
   3   3   4  359.46   24.00
  -4  -3  -4   91.29    6.70
   4  -3   4   93.69    7.70
  -4  -3  -4   96.59    7.30
  -4  -3  -4   90.99    7.10
  -4  -3  -4   82.29    7.00
   4  -3   4  102.29    9.20
   4  -3   4   87.19    9.30
   4  -3   4   90.29   10.50
  -4  -3  -4   83.99    7.20
   4   3   4   88.29    7.00
  -4   3  -4   98.99    9.80
   4   3   4   81.89    6.90
   4   3   4   92.49    7.20
   4   3   4   85.39    6.80
  -4   3  -4   92.09    7.90
   4   3   4   84.59    8.00
   4   3   4   89.99    7.10
  -5  -3  -4   37.10    3.90
  -5  -3  -4   28.90    5.00
   5  -3   4   40.20    5.60
  -5  -3  -4   26.60    4.30
   5  -3   4   39.00    6.80
  -5  -3  -4   29.90    4.60
   5  -3   4   34.80    5.00
   5  -3   4   35.70    8.30
   5   3   4   27.50    4.40
   5   3   4   32.40    3.70
   5   3   4   29.50    4.60
  -5   3  -4   30.60    5.60
   5   3   4   31.60    4.00
   5   3   4   24.40    4.50
   5   3   4   34.10    3.90
  -5   3  -4   34.70    4.90
  -6  -3  -4    3.50    3.00
   6  -3   4   -0.70    6.90
   6  -3   4   -3.50    8.20
  -6  -3  -4    3.80    2.50
  -6  -3  -4    6.30    3.00
   6  -3   4    8.10    4.90
  -6  -3  -4    3.20    2.60
  -6   3  -4    6.30    5.10
   6   3   4    9.40    3.80
  -6   3  -4    9.10    4.10
   6   3   4   -4.20    2.60
   6   3   4    4.50    2.80
   6   3   4   -0.10    2.90
   6   3   4   -1.80    2.50
  -7  -3  -4   76.99    7.70
  -7  -3  -4   90.49    8.60
   7  -3   4  103.79   11.00
  -7  -3  -4   86.49    7.50
   7   3   4   91.09    7.70
   7   3   4   81.29    7.50
  -7   3  -4   98.19    7.60
   7   3   4   94.09    8.20
  -7   3  -4   91.89   10.30
  -8  -3  -4    3.60    3.00
  -8  -3  -4    4.60    3.30
   8  -3   4   12.60    6.60
  -8  -3  -4   -6.60    3.70
  -8   3  -4   -2.60    6.00
   8   3   4    0.80    3.00
   8   3   4   -2.60    3.40
   9  -3   4  215.48   18.20
  -9  -3  -4  194.58   15.00
  -9  -3  -4  181.08   14.50
  -9  -3  -4  183.68   14.00
  -9   3  -4  229.98   17.40
   9   3   4  165.58   13.90
  -9   3  -4  219.28   14.10
   9   3   4  160.98   14.00
 -10  -3  -4   11.20    4.00
 -10  -3  -4   14.50    4.40
 -10  -3  -4   10.70    5.00
  10   3   4   12.20    4.40
  10   3   4   12.60    4.20
  10   3   4   13.40    5.80
 -10   3  -4   16.00    4.10
 -10   3  -4   17.10   10.00
 -11  -3  -4   35.60    5.70
  11  -3   4   24.90    8.50
 -11  -3  -4   38.30    6.50
 -11   3  -4   46.40   10.50
  11   3   4   31.40    7.30
 -11   3  -4   36.80    5.70
  11   3   4   42.30    6.00
 -12  -3  -4   31.30    6.00
 -12  -3  -4   25.70    5.90
 -12  -3  -4   26.30    6.70
  12  -3   4   23.40   10.00
  12   3   4   32.30    6.20
  12   3   4   32.00    6.20
  12   3   4   33.10    8.10
 -12   3  -4   30.20    6.20
 -12   3  -4   48.40   11.70
 -13  -3  -4    3.20    6.70
 -13  -3  -4   15.70    6.50
  13  -3   4   16.90   11.80
 -13  -3  -4   11.80    5.80
  13   3   4   12.30    6.60
  13   3   4   16.80    8.10
  13   3   4    9.60    6.20
 -14  -3  -4   34.50    8.10
 -14  -3  -4   30.40    7.30
  14  -3   4   37.30   13.20
 -14  -3  -4   21.30    8.20
  14   3   4   11.90   13.00
  14   3   4   36.90   10.10
  14   3   4   25.40    7.30
  14  -4  -4  -13.40   16.60
 -14  -4   4    1.00    5.00
 -14  -4   4   -0.30    5.70
 -14  -4   4  -13.30    8.30
  14   4  -4  -11.00    6.00
 -13  -4   4   -4.80    7.20
  13  -4  -4  -28.50   14.50
 -13  -4   4    0.40    4.40
 -13  -4   4    8.50    5.20
  13   4  -4   -3.00    5.60
 -12  -4   4   50.49    7.60
 -12  -4   4   58.09    8.70
 -12  -4   4   57.59    8.20
  12  -4  -4   53.49   16.70
 -12   4   4   49.40   10.80
  12   4  -4   51.69    8.70
 -11  -4   4   21.00    6.40
 -11  -4   4   28.10    5.00
  11  -4  -4   31.20   14.40
 -11  -4   4   23.40    4.80
 -11   4   4   34.10   15.60
  11   4  -4   31.30    5.80
 -11   4   4   38.60    9.10
  10  -4  -4   10.60   11.30
 -10  -4   4   -5.70    3.20
 -10  -4   4   -4.40    3.70
  10  -4  -4    2.00   10.40
 -10  -4   4   -0.50    5.30
 -10   4   4    8.80    7.40
 -10   4   4   -6.70   10.20
  10   4  -4   -1.80    3.90
  -9  -4   4    3.50    3.90
   9  -4  -4   -7.20    8.80
  -9  -4   4    9.30    5.40
   9  -4  -4   10.80   11.10
  -9   4   4   29.00   10.50
  -9   4   4    5.90    6.50
  -9   4   4    3.50    7.00
   9   4  -4    2.80    3.70
   8  -4  -4   61.39    9.90
  -8  -4   4   87.49    7.50
   8  -4  -4  117.19   17.50
  -8  -4   4   99.89   10.30
  -8  -4   4   79.09    7.60
   8   4  -4   85.09    8.20
  -8   4   4  117.09   15.70
  -8   4   4   69.79   11.30
  -7  -4   4  126.39    8.70
  -7  -4   4  119.59   11.10
  -7  -4   4  121.19    8.80
   7  -4  -4   99.19   17.10
   7  -4  -4   93.99   11.90
  -7  -4   4  109.69    8.80
  -7   4   4   94.39   14.90
  -7   4   4  103.89   13.90
  -7   4   4  112.39   11.80
   7   4  -4  118.09    9.40
  -6  -4   4  413.96   28.60
  -6  -4   4  492.55   30.10
   6  -4  -4  376.46   32.40
  -6  -4   4  471.15   28.60
  -6   4   4  404.96   31.10
   6   4  -4  445.26   29.10
  -6   4   4  460.85   31.80
  -6   4   4  441.56   31.00
   5  -4  -4    9.00    7.10
   5  -4  -4   13.80    4.80
   5  -4  -4    2.30    7.60
  -5   4   4   23.10    7.10
  -5   4   4   13.40    7.10
   4  -4  -4   18.60    6.30
   4  -4  -4   12.60    4.00
   4  -4  -4   18.60    7.40
  -4   4   4   21.90    7.40
   3  -4  -4    4.90    6.60
   3  -4  -4    7.30    6.40
   3  -4  -4   13.60    4.00
  -3   4   4    8.50    6.90
  -2  -4   4  179.08   12.00
  -2  -4   4  172.38   13.40
  -1  -4   4  445.46   26.20
   1  -4  -4  355.66   27.90
  -1  -4   4  413.06   27.10
  -1   4   4  383.46   28.60
   0  -4  -4 2048.20  139.59
   0  -4   4 2299.07  139.99
   0  -4   4 2183.38  139.49
   0   4   4 2209.38  140.89
   0   4   4 2066.49  139.69
   0   4  -4 2386.26  139.79
  -1  -4  -4   28.80    4.30
  -1   4  -4   18.20    6.10
  -2  -4  -4   31.10    4.40
  -2  -4  -4   24.90    3.90
   2   4   4   36.50    4.70
   2   4   4   25.40    4.10
   2   4   4   24.90    3.40
   2   4   4   44.40    7.40
   2   4   4   20.20    5.80
  -3  -4  -4   91.89    7.50
  -3  -4  -4   90.69    7.40
  -3  -4  -4   88.79    6.80
   3   4   4   74.59    7.40
   3   4   4   88.79   10.20
   3   4   4   88.59    7.40
   3   4   4   79.69    6.80
   3   4   4   74.79    6.60
   3   4   4   83.69    7.40
   3   4   4   90.89    8.70
  -4  -4  -4    1.40    2.20
   4  -4   4    0.40    3.50
  -4  -4  -4   -2.70    2.80
   4  -4   4  -11.80    6.80
   4  -4   4   -1.20    5.80
  -4  -4  -4   -1.40    2.80
  -4  -4  -4   -1.50    2.80
   4  -4   4   12.30    8.10
  -4  -4  -4    5.20    2.90
   4   4   4    0.90    2.20
   4   4   4   -4.70    2.80
   4   4   4   -0.10    6.20
   4   4   4    1.60    2.90
   4   4   4    1.60    4.00
   4   4   4    0.60    2.50
   4   4   4   -1.40    2.30
  -4   4  -4   -2.90    4.70
  -5  -4  -4   -3.20    2.70
   5  -4   4    7.60    4.00
   5  -4   4    6.40    6.60
  -5  -4  -4   -1.90    2.50
  -5  -4  -4    0.20    2.90
   5   4   4   -3.30    3.00
  -5   4  -4    7.80    4.50
  -5   4  -4   -1.40    5.80
   5   4   4   -2.00    2.50
   5   4   4   -4.00    2.80
   6  -4   4    9.00    7.30
   6  -4   4    1.20    4.40
  -6  -4  -4    2.50    3.10
  -6  -4  -4   -1.30    3.40
  -6  -4  -4   -0.70    3.00
   6   4   4    2.80    2.90
  -6   4  -4    6.50    7.00
   6   4   4   -1.10    3.40
  -6   4  -4    9.60    5.20
   6   4   4   -1.80    3.10
  -7  -4  -4   18.10    4.40
   7  -4   4   21.60    5.50
  -7  -4  -4   22.30    4.80
  -7  -4  -4   22.40    4.50
   7   4   4   23.20    4.80
   7   4   4   25.00    4.30
   7   4   4   24.00    4.20
  -8  -4  -4   89.09    8.70
   8  -4   4   91.79   15.40
   8   4   4   87.19    8.70
   8   4   4   93.59    8.90
   8   4   4   69.99    8.00
  -9  -4  -4   32.60    4.90
  -9  -4  -4   22.10    5.70
  -9   4  -4   29.90    9.20
   9   4   4   25.50    4.80
   9   4   4   22.30    5.30
 -10  -4  -4   41.20    7.20
  10  -4   4   45.70   11.50
 -10  -4  -4   54.89    8.10
 -10  -4  -4   68.19    8.30
  10   4   4   50.09    7.80
 -10   4  -4   71.89    7.60
  10   4   4   49.99    7.00
 -11  -4  -4   40.80    7.10
 -11  -4  -4   39.30    6.70
 -11  -4  -4   54.79    8.50
  11  -4   4   25.60   14.10
  11   4   4   47.20    7.30
 -11   4  -4   65.49   11.90
  11   4   4   32.50    6.40
  12  -4   4    0.20   10.90
 -12  -4  -4   10.90    5.60
 -12  -4  -4    1.10    6.50
 -12  -4  -4    4.00    6.00
  12   4   4   16.50    6.70
 -13  -4  -4   10.70    6.70
  13  -4   4  -10.60   11.00
 -13  -4  -4   -0.90    6.10
 -13  -4  -4    5.60    7.50
 -13   4  -4   11.10   15.40
  13   4   4   -1.30    6.90
 -13  -5   4  -11.30    5.60
 -13  -5   4   -6.00    8.00
 -13  -5   4    3.80    5.30
  13  -5  -4    6.70   20.70
  13   5  -4    3.60    6.20
 -12  -5   4   22.60    7.50
 -12  -5   4   20.20    5.30
 -12  -5   4   11.10    5.50
  12  -5  -4    8.30   16.50
  12   5  -4   13.40    5.80
  11  -5  -4  -14.70   16.50
 -11  -5   4   14.40    6.60
 -11  -5   4    6.90    4.60
 -11  -5   4   15.40    4.70
  11   5  -4   15.20    5.50
 -10  -5   4   -0.40    3.90
  10  -5  -4   -4.00   14.80
 -10  -5   4   -2.70    5.40
 -10  -5   4    2.00    3.70
 -10   5   4   15.60    8.80
  10   5  -4    2.30    4.80
 -10   5   4  -12.00   14.20
  -9  -5   4   86.49    7.50
  -9  -5   4   87.99   11.00
   9  -5  -4   47.10   15.20
  -9  -5   4   83.49    8.00
  -9   5   4   71.79   14.00
   9   5  -4   70.99    9.10
  -8  -5   4   44.10    7.30
  -8  -5   4   49.99    7.10
  -8  -5   4   47.90    5.60
   8  -5  -4   67.79   14.20
   8   5  -4   44.80    7.50
  -7  -5   4  251.77   16.50
  -7   5   4  178.38   24.00
   6  -5  -4   80.29   13.20
  -6  -5   4   63.79   10.10
  -6  -5   4   52.99    5.50
   6   5  -4   58.99    7.50
  -6   5   4   50.89   11.90
  -5  -5   4   95.69   10.50
  -5  -5   4   74.99    7.20
   5  -5  -4  107.69   17.30
   5   5  -4   94.49    8.70
  -5   5   4   76.19   14.10
  -4  -5   4   70.59    9.10
   4  -5  -4   68.99   10.70
  -4  -5   4   61.39    5.80
  -4   5   4   57.19   11.50
   4   5  -4   54.39    7.40
   3  -5  -4  225.48   23.20
  -3  -5   4  278.87   19.40
  -3   5   4  221.88   21.50
   3   5  -4  313.07   18.80
  -2  -5   4  127.09   11.50
  -2   5   4  113.29   14.60
   2   5  -4  125.39   10.40
  -1  -5   4   95.09   10.60
  -1  -5   4   96.89    8.10
  -1   5   4   86.69   13.00
   1   5  -4  109.59    8.90
   0  -5   4   53.89    6.40
   0  -5   4   54.89    8.00
   0   5  -4   58.09    6.90
   1  -5   4  376.46   27.00
   1  -5   4  401.86   29.50
   1   5   4  385.86   27.40
   1   5   4  437.46   29.80
  -1   5  -4  438.66   27.50
   1   5   4  411.26   27.40
   2  -5   4   -6.20    3.80
   2  -5   4    0.60    9.00
  -2  -5  -4   -0.90    2.80
   2   5   4   -1.10    3.20
  -2   5  -4   -1.80    7.30
   2   5   4    7.30    7.70
   2   5   4   -4.00    3.20
   2   5   4    0.00    4.20
   2   5   4   -6.30    7.00
   2   5   4    0.50    3.60
   3  -5   4   40.60    6.60
  -3  -5  -4   30.00    4.60
  -3  -5  -4   27.30    4.40
   3  -5   4   46.00    9.00
   3   5   4   39.00    4.80
   3   5   4   15.90    5.30
   3   5   4   45.90    9.50
   3   5   4   27.20    4.80
  -4  -5  -4   45.40    6.90
  -4  -5  -4   68.79    7.30
   4   5   4   51.49    7.00
   4   5   4   78.39   11.00
   4   5   4   61.49    7.20
   4   5   4   42.90    7.00
   5  -5   4  339.27   28.50
  -5  -5  -4  402.76   24.20
  -5  -5  -4  370.96   24.00
  -5  -5  -4  341.87   24.10
   5   5   4  330.47   23.90
  -5   5  -4  337.67   25.60
   5   5   4  349.27   24.20
   5   5   4  334.07   26.50
   5   5   4  366.36   23.90
  -6  -5  -4  225.68   16.30
  -6  -5  -4  228.88   16.20
   6  -5   4  185.48   22.20
  -6  -5  -4  236.28   16.00
   6   5   4  215.48   15.80
   6   5   4  202.98   16.10
   6   5   4  211.38   19.60
   6   5   4  207.88   15.70
   7  -5   4    9.80   10.40
  -7  -5  -4    5.00    4.40
  -7  -5  -4   -0.50    4.20
  -7  -5  -4    3.70    4.20
   7   5   4    5.30    4.30
   7   5   4    5.60    9.60
   7   5   4   -4.30    4.70
  -7   5  -4    4.80    9.20
   7   5   4    4.40    4.00
  -8  -5  -4   89.29   10.20
  -8   5  -4  105.79   13.40
   8   5   4   94.09    9.60
   8   5   4   75.09    9.70
   8   5   4   77.69    8.70
  -9  -5  -4    0.50    5.40
  -9  -5  -4   -1.10    5.60
   9  -5   4    9.80   13.60
  -9  -5  -4   -0.80    5.20
   9   5   4    4.60    8.10
  -9   5  -4    0.50   11.20
   9   5   4    4.40    5.40
   9   5   4    2.90    4.80
 -10  -5  -4   47.40    7.40
 -10  -5  -4   34.90    6.60
  10  -5   4   19.30   15.50
 -10  -5  -4   36.40    6.70
  10   5   4   39.60    7.40
  11  -5   4    5.10   17.40
 -11  -5  -4   42.50    7.30
 -11  -5  -4   34.70    6.90
 -11  -5  -4   35.00    7.40
  11   5   4   43.90    7.60
  11   5   4   36.80    7.80
 -12  -5  -4   -1.00    7.20
 -12  -5  -4   12.40    6.80
  12  -5   4    0.20   14.70
 -12  -5  -4   12.10    6.80
  12   5   4   22.30    7.80
 -12   5  -4   27.50   16.60
  12   5   4    4.90    7.30
 -11  -6   4    8.20    4.50
  11  -6  -4  -21.70   19.90
 -11  -6   4  -11.50    6.60
 -11  -6   4   -0.30    5.30
  11   6  -4    1.20    5.90
  10  -6  -4   -4.80   17.60
 -10  -6   4    3.40    4.10
 -10  -6   4   -9.40    6.40
  10   6  -4   10.40    5.90
  -9  -6   4   10.50    3.70
  -9  -6   4   12.80    6.40
   9  -6  -4   -5.10   16.50
   9   6  -4   10.70    5.50
   8  -6  -4   -5.30   15.60
  -8  -6   4    5.60    3.40
  -8  -6   4    0.30    6.20
  -8   6   4    5.90   14.60
   8   6  -4    9.80    5.50
  -8   6   4    1.10   13.00
  -7  -6   4   43.80    7.50
   7  -6  -4   40.70   15.00
   7   6  -4   36.80    6.60
  -7   6   4   18.90   13.50
   6  -6  -4  171.78   25.20
  -6  -6   4  163.58   14.20
  -6   6   4  118.59   19.40
   6   6  -4  144.99   12.90
  -6   6   4  124.39   19.50
   5  -6  -4   25.90   12.80
  -5   6   4   17.10   12.40
   5   6  -4   29.50    6.00
  -4  -6   4    8.70    6.20
  -4   6   4   10.60   11.90
   4   6  -4    0.20    8.20
  -3  -6   4  250.97   19.40
   3  -6  -4  215.58   26.20
   3   6  -4  242.28   17.80
  -2  -6   4   58.69   10.00
  -2   6   4   45.20   12.40
   2   6  -4   40.10    6.30
  -1  -6   4  624.04   41.70
  -1   6   4  617.14   44.20
   1   6  -4  620.94   41.10
   0  -6   4  130.99   13.50
   0   6  -4  147.69   16.10
   0   6   4  120.59   12.20
   0   6   4  148.59   16.70
   0   6  -4  128.09   12.40
  -1  -6  -4   -1.50    3.40
   1  -6   4  -13.40   10.50
  -1   6  -4   -4.30    5.80
   1   6   4    0.80    5.20
   1   6   4    0.30    9.80
   2  -6   4   21.70   12.00
  -2   6  -4   19.70   10.80
   2   6   4   -8.50    4.60
   2   6   4    1.00    9.80
   3  -6   4   23.50   12.20
  -3  -6  -4   18.80    4.40
  -3   6  -4   16.20   11.30
   3   6   4   14.40    5.70
   3   6   4   27.80   10.70
  -4  -6  -4   46.30    8.20
   4  -6   4   87.99   15.40
   4   6   4   63.49    8.40
   4   6   4   68.29   13.40
   4   6   4   66.09    9.30
  -5  -6  -4    2.60    4.80
   5  -6   4   31.80   13.20
  -5  -6  -4   15.80    5.30
   5   6   4    5.50    4.80
   5   6   4    3.30    4.90
  -5   6  -4    9.50    7.70
  -6  -6  -4  214.18   16.20
  -6  -6  -4  216.88   16.50
   6  -6   4  184.18   26.00
   6   6   4  219.18   16.30
   6   6   4  197.18   16.50
  -7  -6  -4   -0.80    5.00
   7  -6   4  -13.40   14.30
  -7  -6  -4   -0.10    5.20
  -7  -6  -4   -1.30    5.70
   7   6   4    4.50    5.30
   7   6   4   -2.70    5.60
   7   6   4    1.10   11.90
  -7   6  -4   -0.20    9.90
   8  -6   4    1.40   16.40
  -8  -6  -4   -2.30    5.40
  -8  -6  -4    3.10    5.70
  -8  -6  -4    5.30    6.30
   8   6   4    0.00    5.90
   8   6   4   12.90   12.60
  -8   6  -4    1.80   10.40
   8   6   4   -3.80    5.50
  -9  -6  -4   34.30    7.10
   9  -6   4   58.59   19.00
  -9  -6  -4   30.70    7.00
  -9  -6  -4   37.30    7.50
   9   6   4   25.20    6.80
   9   6   4   36.10    7.70
  -9   6  -4   37.50   17.10
 -10  -6  -4  182.38   16.20
 -10  -6  -4  192.28   17.30
 -10  -6  -4  196.18   16.80
 -10   6  -4  171.28   24.50
  10   6   4  188.18   16.90
  10   6   4  189.88   16.70
  11  -6   4   -6.00   20.40
 -11  -6  -4   -6.10    7.40
 -11  -6  -4    4.10    7.70
 -11  -6  -4  -12.30    7.90
  11   6   4    4.60    8.40
  11   6   4   -6.90    7.60
 -10  -7   4    8.70    9.00
  10  -7  -4   19.00   24.90
  10   7  -4   21.60    8.30
  -9  -7   4    5.20    7.30
   9  -7  -4   19.00   20.70
   9   7  -4    7.60    6.20
   8  -7  -4   -5.90   19.50
  -8  -7   4   -0.40    6.60
   8   7  -4   -4.70    5.70
  -8   7   4    1.90   17.30
   7  -7  -4   28.70   19.00
  -7  -7   4   30.20    7.60
  -7   7   4    8.00   17.00
   7   7  -4   25.70    6.70
   6  -7  -4  100.19   20.90
  -6  -7   4  114.99   14.10
  -6   7   4  106.59   21.00
   6   7  -4  101.79   11.90
  -5  -7   4   35.60    7.80
   5  -7  -4   44.70   17.10
  -5   7   4   47.00   16.60
   5   7  -4   29.90    7.00
  -4  -7   4   43.30    8.30
   4  -7  -4   39.90   16.10
  -4   7   4   46.00   15.90
   4   7  -4   47.00    7.80
   3  -7  -4   35.80   15.80
  -3  -7   4   43.30    8.60
  -3   7   4   44.70   14.60
   3   7  -4   25.00    6.70
   2  -7  -4   46.10   16.20
   2   7  -4    9.20    5.90
  -2   7   4   27.80   13.70
   1  -7  -4  259.77   29.60
  -1  -7   4  210.28   18.90
  -1   7   4  208.48   23.90
   1   7  -4  206.68   17.90
   0  -7   4  290.17   32.30
   0   7  -4  260.17   20.50
   0   7   4  218.78   24.60
   1  -7   4   42.70   17.10
  -1   7  -4   23.30   14.10
   1   7   4   26.60   13.10
   1   7   4   10.00    7.10
  -2  -7  -4   44.10    6.20
   2  -7   4   59.19   15.80
   2   7   4   67.49    9.10
  -2   7  -4   57.89   15.30
   3  -7   4  -32.50   16.60
  -3   7  -4   -8.50   16.20
  -3   7  -4    2.30   10.90
   3   7   4  -13.30   13.20
   3   7   4   -2.00    6.60
  -4  -7  -4   -3.30    4.90
   4   7   4   -2.50   13.20
   4   7   4   10.60    6.40
  -4   7  -4   20.40   11.90
   5  -7   4   72.49   18.80
  -5  -7  -4   76.19   10.30
  -5   7  -4  100.89   15.80
   5   7   4  117.09   17.60
   5   7   4   77.49   11.30
   6  -7   4   13.40   17.40
  -6  -7  -4    6.50    5.80
  -6  -7  -4   -5.20    6.40
   6   7   4   -5.60    6.30
   7  -7   4   -7.00   19.40
  -7  -7  -4   11.10    7.10
  -7  -7  -4   -0.20    6.10
  -7   7  -4   16.10   13.30
   7   7   4    2.50    6.80
  -8  -7  -4   35.90    8.20
  -8  -7  -4   41.30    7.80
   8   7   4   42.40    8.90
  -8   7  -4   41.70   15.30
  -9  -7  -4   20.00    7.70
  -9  -7  -4   32.40    8.80
   9   7   4   33.40    8.50
   7  -8  -4    5.00   23.40
  -7  -8   4  -14.80    8.20
  -7   8   4   -8.70   22.20
   7   8  -4   -5.80    7.40
  -6  -8   4   50.49    9.80
   6  -8  -4   61.99   23.80
   6   8  -4   43.10    8.80
  -6   8   4   62.19   21.90
  -5  -8   4   -2.00    8.50
   5  -8  -4   33.90   21.30
   5   8  -4   20.30    7.10
  -5   8   4   25.70   20.00
  -4  -8   4   16.60    8.70
   4  -8  -4   40.30   19.30
   4   8  -4   12.20    7.60
  -4   8   4   18.30   19.00
   3  -8  -4    7.40   18.90
  -3  -8   4    3.20    8.40
  -3   8   4   32.70   17.70
   3   8  -4    1.80    7.40
  -2  -8   4    6.10    8.30
   2  -8  -4   -0.70   19.50
   2   8  -4    5.40    8.20
  -2   8   4   11.60   17.40
   1  -8  -4   85.79   21.70
  -1  -8   4   60.09   19.30
   1   8  -4   81.09   12.10
  -1   8   4   95.19   19.50
   0  -8   4   33.70   21.70
   0  -8  -4    3.10   17.70
   0   8   4   32.70   17.20
   0   8  -4   20.20   10.00
   0   8  -4   37.90   20.60
   1  -8   4    8.50   21.10
  -1  -8  -4   -1.00    5.70
  -1   8  -4    6.20   16.90
   1   8   4   -5.70   15.30
  -2  -8  -4    1.90    5.10
   2  -8   4   22.50   20.30
   2   8   4   22.00   17.00
   2   8   4   12.30    9.30
  -2   8  -4   -7.20   25.00
   3  -8   4  -28.80   21.40
  -3  -8  -4   -5.50    5.60
   3   8   4   -2.60    8.90
   3   8   4  -11.60   15.90
  -4  -8  -4    7.40    5.90
   4  -8   4   -3.00   25.30
   4   8   4   27.10   17.20
  -4   8  -4   20.10   15.40
   4   8   4    9.90    8.80
  -5  -8  -4  -10.40    6.20
   5   8   4    4.60    8.20
   5   8   4   -2.60   18.10
  -6  -8  -4    2.90    6.80
   6   8   4   10.80    8.40
   6   8   4   42.80   19.50
   0  -9   4   49.50   27.60
   0  -9  -4   23.20   25.70
 -15   0   5    1.10    7.70
  15   0  -5    5.60    8.00
 -14   0   5    4.00    7.60
  14   0  -5    7.50    7.30
 -14   0   5   -4.50    7.00
  13   0  -5    0.40    6.30
 -13   0   5    7.40    6.90
 -13   0   5   -4.60    6.10
  12   0  -5  -10.10    5.80
  12   0  -5    0.90   12.70
 -12   0   5    1.00    6.20
 -11   0   5   -7.40    5.10
 -11   0   5   -5.20    5.80
  11   0  -5    1.30    5.30
  11   0  -5   -0.40    7.80
  10   0  -5   -4.50    7.00
 -10   0   5   -5.30    5.50
   9   0  -5  -10.30    6.00
   9   0  -5    9.10    5.60
  -9   0   5    4.40    4.60
  -9   0   5   11.90    4.90
   8   0  -5   -0.40    3.80
  -8   0   5    3.80    4.60
   8   0  -5    9.80    4.60
  -8   0   5   -0.10    3.60
   8   0  -5   -2.40    4.40
  -8   0   5   -0.40    3.80
  -7   0   5    0.50    3.50
   7   0  -5    1.10    3.30
  -7   0   5    1.00    3.30
   7   0  -5   -0.50    3.60
  -7   0   5    2.30    3.80
   7   0  -5   -2.70    3.80
  -6   0   5    3.70    3.30
   6   0  -5    1.90    3.30
  -6   0   5    5.10    3.30
   6   0  -5   -0.10    3.30
  -5   0   5    3.40    3.00
   5   0  -5    3.70    3.00
   4   0  -5   -0.30    2.50
   4   0  -5   -0.30    2.50
  -4   0   5   -0.30    3.00
   4   0  -5   -0.30    2.90
  -4   0   5    0.90    2.30
  -3   0   5   -2.50    2.60
   3   0  -5   -5.10    2.40
  -3   0   5   -1.30    2.80
  -2   0   5   -1.90    2.20
   2   0  -5   -2.70    2.00
  -2   0   5   -1.90    2.20
   2   0  -5   -1.30    2.00
   1   0  -5    5.00    1.80
  -1   0   5   -0.30    1.70
  -1   0   5   -0.50    1.90
   0   0   5    0.20    1.50
   0   0   5   -1.50    1.50
   0   0  -5   -0.20    1.40
   1   0   5    0.90    1.20
   1   0   5   -1.40    1.40
  -1   0  -5    0.60    1.30
  -1   0  -5    2.70    1.30
   1   0   5    1.70    1.40
   1   0   5    1.10    1.30
   1   0   5   -1.30    1.30
  -1   0  -5    2.00    1.50
   2   0   5   -0.70    1.10
   2   0   5   -1.00    1.30
  -2   0  -5   -0.90    1.10
   2   0   5   -2.10    1.30
  -2   0  -5   -2.60    1.20
   2   0   5   -1.50    1.10
  -2   0  -5   -0.90    1.40
  -2   0  -5   -1.80    1.50
  -2   0  -5   -0.90    1.30
   3   0   5   -2.20    1.40
   3   0   5   -1.50    1.70
  -3   0  -5    0.40    1.40
  -3   0  -5   -1.90    1.40
   3   0   5   -2.20    1.40
   3   0   5    0.00    1.40
   3   0   5   -2.10    1.30
  -3   0  -5    0.20    1.60
   3   0   5   -2.90    1.20
   4   0   5   -1.00    1.50
  -4   0  -5   -0.70    1.40
   4   0   5   -1.10    1.50
  -4   0  -5   -0.80    1.70
   4   0   5    0.80    1.70
  -4   0  -5    0.70    1.90
   4   0   5   -1.30    2.00
   4   0   5   -0.60    1.70
  -4   0  -5   -1.30    1.70
   4   0   5   -2.50    1.50
   5   0   5    1.50    2.50
   5   0   5    3.90    1.90
   5   0   5    3.30    2.00
  -5   0  -5    1.50    1.70
   5   0   5    2.00    2.00
  -5   0  -5    2.60    1.90
  -5   0  -5    2.90    2.00
   5   0   5    3.00    2.10
  -5   0  -5    1.70    2.30
   6   0   5   -2.80    2.80
  -6   0  -5    0.40    2.10
   6   0   5   -1.40    2.30
  -6   0  -5   -1.30    2.60
  -6   0  -5   -1.00    2.10
  -6   0  -5   -2.00    1.80
   6   0   5   -2.70    2.20
   7   0   5    1.50    3.10
  -7   0  -5   -1.20    2.20
  -7   0  -5   -1.10    2.00
   7   0   5   -2.00    3.40
   7   0   5    2.10    3.00
  -7   0  -5   -3.50    2.50
  -7   0  -5    2.70    3.30
   7   0   5    2.20    2.70
   8   0   5    0.60    4.00
  -8   0  -5   -1.30    2.90
  -8   0  -5    1.00    2.60
   8   0   5    0.70    3.80
  -8   0  -5   -1.30    2.40
  -8   0  -5   -2.40    4.30
   8   0   5    1.70    3.10
   8   0   5    2.40    3.60
  -9   0  -5    0.20    3.30
  -9   0  -5    1.50    3.00
   9   0   5    2.70    4.80
   9   0   5    0.40    5.30
   9   0   5    1.90    3.90
  -9   0  -5    0.60    3.60
   9   0   5    9.60    4.70
  10   0   5    6.30    6.50
 -10   0  -5   -1.50    4.10
 -10   0  -5    1.40    3.70
 -10   0  -5    3.00    4.10
  10   0   5    4.00    4.70
 -11   0  -5    0.70    4.60
 -11   0  -5   -4.50    3.80
  11   0   5    9.30    5.10
  11   0   5    2.10    7.60
 -11   0  -5   -1.60    4.80
 -12   0  -5    1.90    5.30
  12   0   5   -1.50    5.70
  13   0   5    7.20    6.60
 -13   0  -5   -2.30    5.00
 -13   0  -5   -5.40    6.50
 -13   0  -5   -0.80    6.90
 -14   0  -5   -2.70    6.50
 -14   0  -5   -2.60   10.50
  14   0   5    1.60    7.40
  15   0   5   15.00    9.00
  15   0   5    0.50    7.50
 -15  -1   5   -8.90    6.80
 -15  -1   5  -10.80    8.40
  15  -1  -5   -2.30    9.20
 -15  -1   5    0.90    7.80
 -15   1   5   15.00    9.80
  15   1  -5   11.30    8.40
 -14  -1   5   12.20    6.80
 -14  -1   5    1.50    6.40
 -14  -1   5   -2.90    6.80
  14  -1  -5   23.60    9.10
 -14   1   5   14.30    9.70
  14   1  -5    8.70    7.30
 -14   1   5   17.30    7.70
  13  -1  -5    2.50    7.90
 -13  -1   5    0.70    5.80
 -13  -1   5    6.30    5.90
 -13   1   5    5.30    7.60
 -13   1   5    3.40    6.50
  13   1  -5   -0.70    6.30
  12  -1  -5   32.70   11.70
 -12  -1   5   44.40    6.50
  12  -1  -5   28.00    8.60
 -12  -1   5   40.40    6.50
 -12  -1   5   30.30    6.40
 -12   1   5   42.40    8.30
 -12   1   5   28.50    7.90
  12   1  -5   53.09    9.40
  11  -1  -5   62.89   11.30
 -11  -1   5   40.30    6.50
 -11  -1   5   38.90    6.30
  11  -1  -5   43.90   10.20
 -11  -1   5   38.30    6.30
 -11   1   5   45.90    7.50
 -11   1   5   30.80    7.50
  10  -1  -5   14.00    6.30
 -10  -1   5   -4.90    4.80
  10  -1  -5   -0.60    8.00
  10  -1  -5    0.60    7.70
 -10   1   5  -12.90    5.90
  10   1  -5    1.70    7.10
 -10   1   5   -1.70    5.70
  10   1  -5   -0.50    6.50
  -9  -1   5   26.00    6.50
   9  -1  -5   13.80    6.90
  -9  -1   5   41.20    5.30
  -9  -1   5   41.90    6.60
   9  -1  -5   30.00    6.90
  -9   1   5   29.80    6.20
   9   1  -5   34.00    6.50
  -9   1   5   29.40    5.80
   9   1  -5   18.60    6.20
   8  -1  -5   50.49    6.80
   8  -1  -5   47.40    6.80
  -8  -1   5   50.79    7.40
   8  -1  -5   63.59    9.50
  -8  -1   5   41.60    6.80
  -8  -1   5   52.89    7.10
  -8  -1   5   46.80    6.70
  -8   1   5   50.89    7.50
  -8   1   5   47.40    6.50
   8   1  -5   47.20    8.10
  -8   1   5   49.50    7.40
   8   1  -5   49.30    6.40
   8   1  -5   42.10    6.20
   8   1  -5   62.09    6.30
  -7  -1   5    1.00    3.20
   7  -1  -5    3.20    4.60
  -7  -1   5   -1.20    3.20
  -7  -1   5   -1.10    3.00
   7  -1  -5    6.70    4.40
   7  -1  -5    1.70    4.40
  -7  -1   5    0.10    3.20
  -7   1   5   -3.10    4.40
  -7   1   5    1.90    3.80
   7   1  -5    0.70    3.70
   7   1  -5    5.10    2.60
  -7   1   5    4.00    3.70
   7   1  -5    0.10    3.60
   7   1  -5   -7.10    3.70
  -6  -1   5 2480.25  157.18
   6  -1  -5 2518.45  157.28
  -6  -1   5 2494.65  156.98
   6  -1  -5 2484.35  157.18
  -6  -1   5 2576.34  156.98
  -6  -1   5 2590.84  156.98
   6  -1  -5 2570.74  157.28
  -6   1   5 2234.18  157.28
   6   1  -5 2325.17  157.18
  -6   1   5 2381.46  158.38
   6   1  -5 2367.06  157.08
  -6   1   5 2657.73  157.18
   6   1  -5 2454.35  157.08
   6   1  -5 2495.85  156.78
  -5  -1   5  475.75   31.90
  -5  -1   5  489.25   31.70
  -5  -1   5  474.35   31.50
   5  -1  -5  534.95   32.30
   5  -1  -5  485.25   32.00
   5  -1  -5  479.75   32.00
  -5  -1   5  490.75   31.70
   5   1  -5  473.45   31.70
   5   1  -5  477.45   31.80
  -5   1   5  496.45   31.90
  -5   1   5  452.65   32.10
  -5   1   5  518.75   32.00
   5   1  -5  485.75   31.40
  -4  -1   5 1337.57   82.69
   4  -1  -5 1154.88   83.09
  -4  -1   5 1265.77   82.89
   4  -1  -5 1440.86   83.19
  -4  -1   5 1280.07   82.69
   4  -1  -5 1304.27   82.79
  -4   1   5 1347.97   82.89
   4   1  -5 1303.77   82.69
  -4   1   5 1359.16   82.89
  -4   1   5 1200.18   82.89
   4   1  -5 1295.27   82.79
   3  -1  -5 3763.72  245.98
   3  -1  -5 3879.81  245.98
  -3  -1   5 3843.42  245.88
  -3  -1   5 3619.44  246.08
  -3  -1   5 3847.91  245.88
   3  -1  -5 4214.68  246.28
   3   1  -5 3975.50  245.98
   3   1  -5 3889.61  245.98
  -3   1   5 3947.41  246.08
   2  -1  -5  517.95   34.80
  -2  -1   5  563.54   34.70
   2  -1  -5  536.65   34.80
   2  -1  -5  555.24   35.10
  -2  -1   5  528.75   34.90
  -2   1   5  524.85   34.90
   2   1  -5  552.94   34.90
  -2   1   5  541.05   34.90
   1  -1  -5 3472.95  223.18
   1  -1  -5 3421.06  223.18
  -1   1   5 3364.26  223.18
   1   1  -5 3266.07  222.88
   1   1  -5 3880.11  223.18
   1   1  -5 3932.81  223.18
  -1   1   5 3360.96  223.18
   0  -1  -5 3543.55  223.68
   0  -1  -5 3551.94  223.68
   0   1   5 3487.35  223.68
   0   1   5 3477.15  223.68
   0   1   5 3623.34  223.68
  -1  -1  -5   20.30    3.40
  -1  -1  -5   29.30    3.70
   1  -1   5   25.30    2.90
  -1  -1  -5   24.30    3.40
  -1  -1  -5   34.90    3.40
   1   1   5   34.30    3.20
   1   1   5   22.00    3.20
   1   1   5   30.70    3.10
   1   1   5   30.50    3.10
   1   1   5   35.20    3.30
  -2  -1  -5  116.29    7.40
  -2  -1  -5  113.09    7.40
   2  -1   5   97.39    7.20
  -2  -1  -5   99.49    7.40
  -2  -1  -5  107.59    7.60
   2  -1   5  107.59    7.10
   2  -1   5   97.79    7.10
   2   1   5  105.39    7.50
   2   1   5   96.89    7.50
   2   1   5  110.49    7.40
  -2   1  -5  112.39    7.20
   2   1   5  107.39    7.30
   2   1   5   90.19    7.40
  -3  -1  -5  150.58    9.60
   3  -1   5  132.19    9.40
  -3  -1  -5  140.09    9.60
   3  -1   5  138.69    9.70
   3  -1   5  124.19    9.40
   3  -1   5  164.18    9.80
   3  -1   5  151.28   10.20
  -3  -1  -5  135.99    9.60
   3  -1   5  138.89    9.50
  -3  -1  -5  137.89    9.90
   3  -1   5  139.49    9.40
   3   1   5  149.39    9.60
   3   1   5  143.49    9.70
   3   1   5  145.29    9.90
  -3   1  -5  130.69    9.40
   3   1   5  131.99    9.60
   4  -1   5   34.60    3.40
  -4  -1  -5   28.30    3.50
   4  -1   5   31.80    3.30
  -4  -1  -5   34.90    3.50
  -4  -1  -5   24.50    3.40
  -4  -1  -5   33.30    3.40
   4  -1   5   28.60    3.90
   4  -1   5   31.40    3.50
   4  -1   5   31.00    3.20
   4  -1   5   31.90    3.30
  -4   1  -5   26.40    3.30
   4   1   5   32.20    4.00
  -4   1  -5   29.70    3.20
   4   1   5   33.10    3.50
   4   1   5   36.70    3.60
  -4   1  -5   28.20    4.40
   4   1   5   35.00    3.40
  -4   1  -5   31.20    3.30
   4   1   5   24.70    4.40
   5  -1   5  141.19    9.80
  -5  -1  -5  144.89    9.90
  -5  -1  -5  135.69    9.90
  -5  -1  -5  137.09    9.90
   5  -1   5  133.99    9.80
  -5  -1  -5  145.59    9.80
   5  -1   5  144.39   10.20
   5  -1   5  144.39   10.00
  -5   1  -5  129.79    9.60
  -5   1  -5  143.79   10.00
   5   1   5  147.39    9.50
   5   1   5  143.89   10.20
   5   1   5  143.99    9.90
   5   1   5  139.89    9.90
   5   1   5  145.09   10.50
   5   1   5  149.39    9.90
  -5   1  -5  129.69   10.40
  -5   1  -5  120.69   10.00
   6  -1   5  173.48   12.60
  -6  -1  -5  179.38   12.70
   6  -1   5  185.18   12.80
   6  -1   5  188.08   12.80
  -6  -1  -5  184.88   12.50
  -6  -1  -5  167.08   12.60
   6  -1   5  203.48   13.20
  -6  -1  -5  188.88   12.50
   6   1   5  189.18   12.10
  -6   1  -5  154.28   13.30
  -6   1  -5  186.08   12.70
   6   1   5  188.38   12.80
   6   1   5  171.48   13.20
  -6   1  -5  170.08   12.30
   6   1   5  185.08   12.60
   6   1   5  184.08   12.60
   6   1   5  194.08   12.60
  -6   1  -5  174.28   12.30
   7  -1   5    0.90    3.20
  -7  -1  -5   -1.00    2.90
   7  -1   5   -3.30    3.30
  -7  -1  -5   -4.60    2.20
   7  -1   5   -4.50    3.10
  -7  -1  -5    4.20    2.60
   7   1   5   -2.90    3.60
   7   1   5   -6.20    2.50
  -7   1  -5    5.50    2.80
  -7   1  -5   -3.40    2.50
  -7   1  -5   -1.30    2.20
   7   1   5    1.80    1.90
   7   1   5   -3.90    3.00
  -7   1  -5   -4.40    4.10
   7   1   5    0.30    2.90
   7   1   5   -1.70    2.90
  -8  -1  -5   30.70    5.10
   8  -1   5   25.60    4.60
   8  -1   5   30.40    4.80
  -8  -1  -5   22.40    3.60
   8  -1   5   16.10    4.60
   8  -1   5   21.20    4.90
  -8  -1  -5   26.40    3.70
  -8   1  -5   26.30    3.60
  -8   1  -5   20.90    5.50
   8   1   5   28.60    4.50
   8   1   5   16.30    5.00
   8   1   5   26.90    4.10
  -8   1  -5   24.30    3.90
   8   1   5   32.30    4.80
   8   1   5   26.40    4.70
  -9  -1  -5   18.80    4.10
  -9  -1  -5   21.50    4.00
  -9  -1  -5   25.30    4.40
   9  -1   5   18.00    6.20
   9  -1   5   21.70    6.30
   9  -1   5   20.20    5.00
   9   1   5   18.20    5.50
  -9   1  -5   28.30    5.20
   9   1   5   14.90    4.50
  -9   1  -5   15.20    3.80
  -9   1  -5   18.70    6.20
   9   1   5   22.00    3.80
 -10  -1  -5   44.70    7.30
 -10  -1  -5   53.79    8.30
 -10  -1  -5   61.49    6.80
  10  -1   5   61.59    9.30
  10  -1   5   78.59   10.60
  10  -1   5   76.99    9.50
  10   1   5   59.09    6.80
 -10   1  -5   50.49    7.70
  10   1   5   74.99    9.30
 -10   1  -5   64.49   10.20
 -10   1  -5   42.00    7.30
  10   1   5   75.59   10.40
  11  -1   5   41.40    8.80
  11  -1   5   29.00    9.10
 -11  -1  -5   26.10    6.70
 -11  -1  -5   25.60    5.60
  11  -1   5   28.80    6.20
  11   1   5   42.40    8.60
 -11   1  -5   33.80    5.60
 -11   1  -5   28.40    5.20
  11   1   5   35.00    5.20
  11   1   5   36.50    6.50
 -11   1  -5   37.20    7.90
 -12  -1  -5   -4.20    5.30
  12  -1   5    6.20    6.30
 -12  -1  -5    5.80    4.80
 -12  -1  -5   -5.00    4.40
  12   1   5   20.00    6.30
 -12   1  -5    5.30    4.70
 -12   1  -5   -1.90    5.30
  12   1   5    4.60    4.70
  13  -1   5   41.10    8.20
 -13  -1  -5   48.80    6.90
 -13  -1  -5   30.90    8.80
 -13  -1  -5   35.30    7.20
  13   1   5   38.00    8.10
  13   1   5   46.40    7.50
 -13   1  -5   37.70    6.70
  13   1   5   42.90    6.40
  14  -1   5   11.20    8.90
 -14  -1  -5   11.90    6.10
 -14  -1  -5   -9.70    7.80
 -14   1  -5    0.50    6.70
  14   1   5   12.20    7.70
  14   1   5    4.80    7.00
  14   1   5   -0.90    6.00
 -15  -2   5    9.90    7.20
 -15  -2   5  -11.60    8.70
 -15  -2   5   10.70    6.10
  15  -2  -5    7.20   11.20
  15   2  -5    8.60    7.90
  15   2  -5   -4.50    6.30
 -15   2   5    5.70   10.70
 -14  -2   5    6.20    6.30
  14  -2  -5  -15.70   10.10
 -14  -2   5   -6.80    7.60
 -14  -2   5   13.20    5.90
 -14   2   5    5.70    8.40
  14   2  -5    7.90    6.80
  13  -2  -5   19.70   10.90
 -13  -2   5   28.90    5.90
 -13  -2   5   29.70    6.00
 -13  -2   5   25.70    7.30
 -13   2   5   43.80   10.90
 -12  -2   5   35.70    5.80
 -12  -2   5   35.60    6.60
  12  -2  -5   18.70   10.20
 -12  -2   5   18.90    6.50
 -12   2   5   45.10   15.40
  12   2  -5   38.60    6.10
 -12   2   5   49.50    8.90
 -12   2   5   22.60    7.40
  11  -2  -5   58.49   12.10
 -11  -2   5   75.69    9.80
  11  -2  -5   47.70   11.10
 -11  -2   5   53.89    8.20
  11  -2  -5   37.00   12.70
 -11  -2   5   66.79    8.10
  11   2  -5   76.79    8.80
 -11   2   5   63.49    8.80
 -11   2   5   47.30    8.60
 -10  -2   5 1076.09   64.29
 -10  -2   5 1076.69   64.89
  10  -2  -5  919.41   66.09
 -10  -2   5 1086.09   64.29
  10  -2  -5  923.11   66.09
 -10   2   5  845.52   64.69
 -10   2   5  942.21   64.99
  10   2  -5 1068.69   64.29
  -9  -2   5  387.96   25.90
  -9  -2   5  388.96   26.70
  -9  -2   5  381.76   25.90
   9  -2  -5  372.86   28.40
   9  -2  -5  342.37   28.30
   9  -2  -5  439.46   28.90
  -9   2   5  373.86   26.70
   9   2  -5  384.16   26.00
  -9   2   5  400.16   28.60
  -9   2   5  386.56   27.10
   8  -2  -5   57.19   11.00
  -8  -2   5   49.30    6.40
   8  -2  -5   55.49    7.30
  -8  -2   5   42.60    6.10
  -8  -2   5   45.60    6.60
   8  -2  -5   50.59    7.40
  -8  -2   5   45.30    7.90
  -8   2   5   56.39    8.00
   8   2  -5   39.70    6.80
  -8   2   5   64.79    9.00
   8   2  -5   44.30    6.20
   8   2  -5   50.09    6.00
  -8   2   5   52.19    8.30
   7  -2  -5   91.59    9.60
   7  -2  -5   63.39    9.30
  -7  -2   5   85.19    6.90
  -7  -2   5   62.79    8.00
  -7  -2   5   66.39    7.00
   7   2  -5   78.89    7.90
  -7   2   5   78.09    8.70
   7   2  -5   65.59    6.60
   7   2  -5   77.19    7.90
   7   2  -5   63.99    8.80
  -7   2   5   75.09    8.70
   6  -2  -5  286.87   20.30
  -6  -2   5  305.97   19.50
  -6  -2   5  288.07   19.40
  -6  -2   5  292.67   19.40
   6  -2  -5  346.17   21.80
  -6  -2   5  288.47   20.30
   6  -2  -5  281.17   20.20
  -6   2   5  304.57   20.40
   6   2  -5  275.27   20.30
   6   2  -5  289.47   19.90
  -6   2   5  298.07   21.10
   6   2  -5  287.67   19.90
  -6   2   5  294.67   20.30
   6   2  -5  277.97   19.30
  -6   2   5  260.77   21.00
  -5  -2   5  352.76   24.10
  -5  -2   5  358.96   23.40
   5  -2  -5  359.66   25.10
   5  -2  -5  349.87   23.80
  -5  -2   5  352.36   23.30
   5  -2  -5  337.97   23.90
  -5   2   5  310.77   24.80
  -5   2   5  367.66   24.10
  -5   2   5  379.06   24.10
   5   2  -5  364.56   23.60
   5   2  -5  386.56   23.10
   5   2  -5  353.36   23.70
   5   2  -5  339.47   24.10
   4  -2  -5  160.38   12.60
   4  -2  -5  160.28   12.60
  -4  -2   5  171.18   12.80
   4  -2  -5  193.98   13.60
  -4  -2   5  179.78   11.90
  -4  -2   5  182.48   12.00
  -4   2   5  154.68   13.10
   4   2  -5  184.58   11.60
  -4   2   5  170.08   13.10
  -4   2   5  152.28   13.70
  -4   2   5  157.48   13.10
   4   2  -5  184.68   12.20
   4   2  -5  188.08   12.20
   3  -2  -5  763.22   51.29
   3  -2  -5  782.72   50.79
  -3  -2   5  781.12   50.49
   3  -2  -5  774.32   50.79
  -3  -2   5  755.22   50.99
  -3   2   5  807.62   50.89
  -3   2   5  771.22   51.39
  -3   2   5  795.52   50.89
   3   2  -5  817.62   50.39
   3   2  -5  827.12   50.59
   3   2  -5  826.42   50.59
   2  -2  -5  449.86   30.70
   2  -2  -5  447.36   30.10
   2  -2  -5  451.35   30.20
   2  -2  -5  470.55   30.90
  -2  -2   5  465.05   30.50
  -2   2   5  460.75   30.30
   2   2  -5  520.55   29.90
  -2   2   5  465.35   30.90
  -2   2   5  458.65   30.30
   1  -2  -5  436.76   28.30
   1  -2  -5  449.26   28.40
  -1  -2   5  430.76   28.00
   1  -2  -5  440.06   28.30
  -1   2   5  429.26   28.50
  -1   2   5  441.56   29.20
  -1   2   5  440.96   28.50
   0  -2   5 1810.22  122.49
   0  -2  -5 1976.10  122.79
   0  -2  -5 2050.19  122.79
   0   2   5 1921.91  122.79
   0   2  -5 1963.60  122.69
   0   2   5 1910.51  122.79
   0   2   5 1935.51  123.29
   0   2   5 1934.91  122.69
   0   2   5 1926.41  122.69
  -1  -2  -5 1255.67   78.39
  -1  -2  -5 1316.47   78.39
   1  -2   5 1208.78   78.49
  -1  -2  -5 1227.88   78.49
  -1  -2  -5 1176.28   78.29
   1   2   5 1247.68   78.39
   1   2   5 1265.87   78.39
   1   2   5 1213.88   78.39
   1   2   5 1245.08   78.39
   1   2   5 1181.48   78.39
  -2  -2  -5  939.31   60.09
  -2  -2  -5  936.71   60.09
   2  -2   5  898.71   60.19
  -2  -2  -5  969.10   59.99
  -2  -2  -5  896.01   60.09
   2  -2   5 1057.29   60.79
   2   2   5  981.80   59.99
  -2   2  -5  851.01   60.09
   2   2   5  931.01   60.09
   2   2   5  942.21   59.99
   2   2   5  935.21   60.09
   2   2   5  973.00   60.19
   2   2   5  945.01   59.99
  -3  -2  -5   -1.60    1.80
   3  -2   5    3.90    1.80
  -3  -2  -5    0.30    2.00
  -3  -2  -5    1.90    2.00
  -3  -2  -5    3.80    2.00
  -3  -2  -5    0.60    1.30
   3   2   5    1.90    2.10
   3   2   5   -3.60    1.80
   3   2   5   -1.70    1.90
   3   2   5   -3.10    1.70
   3   2   5    4.90    1.90
   3   2   5   -0.10    2.30
   4  -2   5   53.29    6.80
  -4  -2  -5   61.89    4.80
  -4  -2  -5   40.20    4.70
   4  -2   5   58.19    4.70
  -4  -2  -5   51.69    4.80
  -4  -2  -5   46.80    4.70
   4   2   5   44.20    4.70
  -4   2  -5   52.29    5.30
   4   2   5   49.50    4.40
   4   2   5   43.70    4.70
   4   2   5   43.20    4.60
  -4   2  -5   39.20    7.00
   4   2   5   51.19    5.70
   5  -2   5   -0.30    4.60
  -5  -2  -5   -0.20    1.90
  -5  -2  -5    1.30    2.20
  -5  -2  -5   -1.00    2.20
   5  -2   5    3.20    2.40
   5  -2   5    4.50    3.10
  -5  -2  -5    1.20    2.20
   5   2   5   -4.00    2.90
   5   2   5    0.10    2.20
   5   2   5   -0.30    2.20
   5   2   5   -2.80    2.10
  -5   2  -5    0.90    2.80
   5   2   5   -2.90    2.20
   5   2   5   -2.30    1.90
  -5   2  -5    2.60    4.00
   6  -2   5  671.93   46.30
  -6  -2  -5  644.44   44.90
  -6  -2  -5  698.63   44.90
   6  -2   5  672.13   44.90
  -6  -2  -5  688.63   44.90
  -6  -2  -5  723.63   45.10
   6  -2   5  721.53   45.30
   6   2   5  702.63   44.90
   6   2   5  732.23   44.90
   6   2   5  715.53   45.00
   6   2   5  691.73   45.40
  -6   2  -5  653.43   44.80
   6   2   5  721.73   45.30
   6   2   5  751.92   44.80
  -6   2  -5  681.13   45.20
   7  -2   5  514.75   33.00
  -7  -2  -5  523.85   32.30
  -7  -2  -5  522.85   32.60
   7  -2   5  460.05   32.50
  -7  -2  -5  523.25   32.30
  -7  -2  -5  425.16   32.90
   7  -2   5  432.36   33.90
  -7   2  -5  503.15   33.00
  -7   2  -5  458.45   32.10
  -7   2  -5  425.56   32.10
   7   2   5  564.14   32.20
   7   2   5  496.05   32.50
   7   2   5  535.05   32.40
   7   2   5  459.15   33.00
   7   2   5  537.75   32.50
   7   2   5  545.55   33.00
  -8  -2  -5  244.18   15.70
   8  -2   5  203.18   16.60
   8  -2   5  197.68   16.80
  -8  -2  -5  241.28   16.10
  -8  -2  -5  229.08   15.60
   8  -2   5  219.28   17.00
  -8   2  -5  209.98   17.10
  -8   2  -5  198.08   15.40
   8   2   5  239.78   15.40
   8   2   5  248.08   15.80
  -8   2  -5  220.18   15.50
   8   2   5  233.08   16.10
   8   2   5  222.78   16.60
  -9  -2  -5  274.57   19.00
   9  -2   5  238.18   20.60
   9  -2   5  270.67   20.50
  -9  -2  -5  293.27   19.20
  -9  -2  -5  283.77   19.50
  -9   2  -5  248.38   20.90
   9   2   5  285.17   20.20
   9   2   5  298.07   19.20
   9   2   5  288.37   20.00
  -9   2  -5  248.48   18.90
  -9   2  -5  255.17   18.90
   9   2   5  300.47   18.80
  10  -2   5   -5.20    5.60
  10  -2   5   -8.70    7.30
  10  -2   5    4.00    7.20
 -10  -2  -5    0.90    3.90
 -10  -2  -5   -5.60    6.00
 -10   2  -5   -3.50    3.60
 -10   2  -5    0.60    4.10
  10   2   5   -5.70    3.60
  10   2   5   -1.80    3.90
  10   2   5   -7.10    4.90
 -11  -2  -5  112.39   10.00
  11  -2   5   85.89   12.80
  11  -2   5   64.69   14.90
 -11  -2  -5  103.49    9.70
 -11  -2  -5  116.59   10.90
 -11   2  -5   86.09    9.80
 -11   2  -5  122.99   13.80
  11   2   5   96.89   12.60
  11   2   5   91.79   10.20
  11   2   5  108.59    9.50
  12  -2   5    6.30    7.20
 -12  -2  -5   22.50    6.50
 -12  -2  -5    4.10    4.90
 -12  -2  -5    9.70    5.60
 -12   2  -5   27.30    8.80
  12   2   5    6.20    5.60
 -12   2  -5   15.70    5.30
  12   2   5   16.90    7.00
 -13  -2  -5    8.60    6.60
  13  -2   5   12.80    7.70
 -13  -2  -5   12.40    7.20
 -13  -2  -5   10.10    5.50
  13   2   5    5.10    5.40
  13   2   5   12.50    7.50
  13   2   5    1.00    6.30
 -13   2  -5    3.50    5.80
 -14  -2  -5    5.10    8.20
 -14  -2  -5   19.60    7.50
 -14  -2  -5   14.60    6.30
  14  -2   5    8.20   10.60
 -14   2  -5   18.00    7.30
  14   2   5   20.90    7.60
  14   2   5    5.20    8.30
  14   2   5    8.10    6.90
 -15  -3   5  -12.20    9.40
 -15  -3   5   17.50    7.40
  15   3  -5    6.50    8.80
  15   3  -5   -1.30    6.60
 -15   3   5   -5.80   13.20
 -14  -3   5   88.29   11.50
  14  -3  -5   67.09   15.80
 -14  -3   5   95.39   10.20
 -14  -3   5  102.39   11.40
  14   3  -5   83.89   10.50
 -14   3   5   63.09   12.00
  14   3  -5  103.99   14.40
 -14   3   5   47.40   21.90
 -13  -3   5   13.40    5.80
  13  -3  -5   19.70   12.90
 -13  -3   5   17.00    7.70
 -13  -3   5   22.20    5.00
  13   3  -5   21.40    5.70
 -13   3   5   28.70    9.40
  13   3  -5   25.30    7.20
 -12  -3   5   75.49    9.20
 -12  -3   5   88.49    8.80
 -12  -3   5   78.99   12.40
  12  -3  -5   69.99   14.10
  12   3  -5   71.29    8.90
 -12   3   5   76.99   11.10
  12   3  -5   86.99   11.20
  11  -3  -5   56.59   12.20
 -11  -3   5   48.10    7.80
  11  -3  -5   58.39   12.50
 -11  -3   5   43.40    7.10
 -11  -3   5   39.30    5.80
 -11   3   5   48.40    9.30
 -11   3   5   55.49   12.60
  11   3  -5   49.30    6.20
 -10  -3   5   19.90    4.60
 -10  -3   5   19.20    4.60
  10  -3  -5   29.30    9.80
 -10  -3   5   23.30    6.70
  10  -3  -5   35.70   10.70
 -10   3   5   27.30    8.00
  10   3  -5   30.20    5.10
  -9  -3   5  106.19   10.70
  -9  -3   5   74.49    8.30
  -9  -3   5   81.79    8.40
   9  -3  -5  115.19   15.80
   9  -3  -5   88.09   10.70
   9  -3  -5   92.39   11.00
   9   3  -5   79.69    9.80
  -9   3   5   86.19   10.10
  -9   3   5  101.19   10.50
   9   3  -5   81.99    8.10
  -8  -3   5  185.48   12.80
   8  -3  -5  151.98   14.90
   8  -3  -5  160.28   15.70
   8  -3  -5  152.28   18.60
  -8  -3   5  198.28   12.70
  -8  -3   5  205.28   14.60
   8  -3  -5  153.08   17.50
  -8  -3   5  179.08   13.30
  -8   3   5  178.88   14.50
  -8   3   5  171.08   14.90
   8   3  -5  173.78   13.50
   8   3  -5  175.08   12.60
  -8   3   5  169.38   17.20
  -7  -3   5  166.78   13.70
  -7  -3   5  181.68   12.00
  -7  -3   5  183.58   12.30
   7  -3  -5  159.88   14.00
  -7  -3   5  184.28   12.10
   7  -3  -5  161.28   16.90
   7  -3  -5  171.68   15.90
   7  -3  -5  156.28   13.60
  -7   3   5  168.38   13.90
  -7   3   5  152.08   16.00
  -7   3   5  168.78   13.90
  -7   3   5  172.88   14.90
   7   3  -5  164.88   12.80
   7   3  -5  165.28   12.10
  -6  -3   5    0.30    2.10
  -6  -3   5   -0.20    2.00
  -6  -3   5   -0.30    3.90
  -6  -3   5    2.30    2.60
   6  -3  -5   10.50    6.90
   6  -3  -5    1.80    4.50
   6  -3  -5    8.30    7.40
   6  -3  -5    5.00    4.30
   6   3  -5   -1.90    2.60
  -6   3   5   -1.70    4.70
  -6   3   5   -3.50    6.00
  -6   3   5    0.40    6.00
   6   3  -5    5.80    3.80
  -6   3   5    0.60    5.60
   6   3  -5    1.30    2.40
   6   3  -5    3.50    3.20
  -6   3   5    0.30    4.70
   6   3  -5   -1.80    4.10
  -5  -3   5   17.40    4.60
  -5  -3   5   19.60    3.00
   5  -3  -5   15.70    6.70
  -5  -3   5   19.90    3.10
   5  -3  -5   16.50    4.50
   5  -3  -5   16.00    6.00
   5  -3  -5   21.50    4.80
  -5   3   5   19.70    6.10
   5   3  -5   17.60    3.10
  -5   3   5   21.50    5.00
   5   3  -5   28.20    4.40
  -5   3   5   27.90    5.10
   5   3  -5   20.60    4.80
  -5   3   5    9.40    6.30
   5   3  -5   16.40    3.60
   4  -3  -5 1388.36   80.09
   4  -3  -5 1086.29   79.09
  -4  -3   5 1229.48   78.79
   4  -3  -5 1173.98   78.39
   4  -3  -5 1133.69   78.19
  -4  -3   5 1241.68   77.99
   4   3  -5 1275.17   78.19
  -4   3   5 1203.38   79.29
   4   3  -5 1235.28   78.09
  -4   3   5 1300.57   78.59
   3  -3  -5  181.58   13.50
  -3  -3   5  218.78   14.40
   3  -3  -5  177.68   15.30
   3  -3  -5  186.58   13.80
   3  -3  -5  199.98   13.70
   3  -3  -5  176.48   15.30
  -3   3   5  198.78   15.50
   3   3  -5  208.58   13.30
  -3   3   5  195.98   14.30
  -3   3   5  202.18   14.40
   2  -3  -5  198.88   14.40
   2  -3  -5  202.58   14.50
   2  -3  -5  213.48   16.20
   2  -3  -5  187.78   15.60
  -2  -3   5  242.58   15.30
   2  -3  -5  199.18   14.20
  -2  -3   5  209.58   13.80
  -2   3   5  204.58   14.70
   2   3  -5  227.08   14.10
  -2   3   5  197.48   16.20
  -2   3   5  216.48   14.80
  -1  -3   5  218.88   14.80
   1  -3  -5  216.08   15.30
  -1  -3   5  244.98   16.00
   1  -3  -5  231.58   15.20
   1  -3  -5  232.88   15.30
   1   3  -5  234.88   15.10
  -1   3   5  213.98   16.80
  -1   3   5  216.58   15.50
  -1   3   5  216.48   15.00
  -1   3   5  224.68   15.50
   0  -3   5   46.10    5.50
   0  -3  -5   46.50    5.30
   0  -3  -5   58.19    4.80
   0  -3  -5   37.70    4.80
   0   3   5   54.99    5.80
   0   3   5   38.60    7.60
   0   3   5   48.80    5.50
   0   3   5   48.20    5.00
   0   3   5   36.10    5.10
   0   3   5   46.20    4.50
   0   3   5   43.80    4.70
  -1  -3  -5    9.50    2.50
  -1  -3  -5    8.00    2.10
  -1  -3  -5    7.40    2.30
  -1  -3  -5    7.90    2.80
   1   3   5    6.70    2.40
   1   3   5   14.00    4.70
   1   3   5    8.00    2.00
   1   3   5    9.30    2.70
   1   3   5    6.70    2.20
   2  -3   5 1081.59   67.79
  -2  -3  -5 1061.09   66.89
  -2  -3  -5 1067.09   66.99
   2  -3   5 1050.69   66.79
  -2  -3  -5 1060.79   66.79
  -2  -3  -5 1024.70   66.79
   2  -3   5 1012.90   67.09
   2   3   5 1023.80   66.79
   2   3   5 1014.60   66.89
   2   3   5 1047.00   66.99
  -2   3  -5 1054.39   67.09
   2   3   5 1040.80   66.69
   2   3   5 1052.59   66.89
   2   3   5 1093.89   67.09
   3  -3   5  824.42   50.49
  -3  -3  -5  802.92   50.49
  -3  -3  -5  813.22   50.49
   3  -3   5  815.92   50.99
  -3  -3  -5  754.02   50.29
  -3  -3  -5  734.13   50.59
   3  -3   5  780.22   51.49
  -3  -3  -5  795.12   50.49
   3   3   5  777.52   50.69
   3   3   5  804.42   50.49
   3   3   5  786.22   50.29
   3   3   5  776.02   50.49
  -3   3  -5  796.12   50.69
   3   3   5  766.02   50.29
   3   3   5  784.92   50.49
   4  -3   5  291.27   22.00
   4  -3   5  331.27   21.10
  -4  -3  -5  286.97   21.10
  -4  -3  -5  338.37   21.10
   4  -3   5  308.57   23.10
   4  -3   5  366.96   22.10
  -4  -3  -5  325.17   21.10
  -4  -3  -5  330.17   21.10
  -4  -3  -5  302.67   20.70
   4   3   5  312.67   20.80
   4   3   5  314.57   20.80
   4   3   5  327.77   21.00
  -4   3  -5  320.87   21.40
   4   3   5  309.27   21.00
   4   3   5  303.27   21.50
   4   3   5  305.97   21.10
   5  -3   5    9.10    6.40
   5  -3   5    6.60    7.50
  -5  -3  -5    0.50    2.50
  -5  -3  -5    7.10    2.80
  -5  -3  -5    2.50    2.80
   5  -3   5    3.70    3.10
  -5  -3  -5    3.30    2.60
   5  -3   5    3.70    4.40
   5   3   5    3.10    2.80
   5   3   5    2.10    2.40
   5   3   5    1.30    2.50
  -5   3  -5    6.30    4.60
   5   3   5   -6.40    3.30
   5   3   5    2.70    2.50
  -5   3  -5   10.10    3.70
  -6  -3  -5  271.77   18.70
  -6  -3  -5  272.27   18.80
  -6  -3  -5  286.77   19.00
   6  -3   5  278.67   20.20
   6  -3   5  272.37   18.80
   6   3   5  287.27   18.70
  -6   3  -5  272.77   19.60
   6   3   5  273.87   18.70
   6   3   5  273.97   18.70
   6   3   5  272.47   18.70
  -7  -3  -5   -5.20    2.90
  -7  -3  -5   -1.00    3.40
  -7  -3  -5   -7.30    3.10
   7  -3   5    5.40    5.50
   7   3   5   -4.60    4.20
  -7   3  -5    0.70    2.50
   7   3   5    3.50    3.20
  -7   3  -5   -0.60    5.10
  -7   3  -5   -2.80    5.90
   7   3   5   -4.50    3.00
   7   3   5   -0.20    2.70
  -8  -3  -5   99.19    8.70
   8  -3   5  103.49   12.70
  -8  -3  -5   95.09    9.50
   8  -3   5   67.79   10.20
  -8  -3  -5   96.49    9.00
  -8   3  -5   73.59   11.70
   8   3   5   98.69    8.80
  -8   3  -5  104.49    8.40
   8   3   5  108.19    8.60
   9  -3   5  252.17   19.90
  -9  -3  -5  215.08   16.90
   9   3   5  238.88   16.90
   9   3   5  242.68   16.90
  -9   3  -5  229.88   16.70
  -9   3  -5  245.88   20.10
 -10  -3  -5   76.99    8.20
 -10  -3  -5   87.69    8.40
 -10  -3  -5   66.09    9.20
  10  -3   5   50.59   11.70
 -10   3  -5   58.59    7.90
 -10   3  -5   82.99   13.00
  10   3   5   61.09    8.10
  10   3   5   69.29    8.30
  11  -3   5   -5.40    8.10
 -11  -3  -5    6.80    4.40
 -11  -3  -5    1.00    5.30
 -11   3  -5    8.70    4.40
 -11   3  -5   -0.20    9.80
  11   3   5   -7.30    4.40
 -12  -3  -5   23.60    5.60
 -12  -3  -5   19.30    6.10
  12  -3   5   15.40   10.50
 -12  -3  -5   12.50    6.50
  12   3   5   12.00    5.80
  12   3   5   14.20    5.70
 -12   3  -5   18.00    5.70
  13  -3   5   11.40   11.10
 -13  -3  -5    2.40    5.70
 -13  -3  -5   -2.90    6.50
 -13  -3  -5    0.90    6.80
  13   3   5   -3.60    6.10
  13   3   5    3.10    6.80
  14  -3   5   -0.10   12.10
 -14  -3  -5   12.70    8.30
 -14  -3  -5    9.40    7.00
 -14  -3  -5    7.10    8.20
  14   3   5    5.80    7.10
 -14  -4   5    8.60    5.50
 -14  -4   5    9.60    5.90
 -14  -4   5  -15.30    8.30
  14   4  -5    3.20    6.60
  14   4  -5   12.00    8.20
  13  -4  -5    1.20   14.90
 -13  -4   5   -0.40    5.10
 -13  -4   5   -0.70    4.50
 -13  -4   5   -4.50    7.60
  13   4  -5    3.80    7.20
  13   4  -5   -4.50    5.40
 -12  -4   5   34.90    8.00
 -12  -4   5   29.90    5.70
  12  -4  -5   21.10   15.20
 -12  -4   5   40.10    6.10
  12   4  -5   30.00    6.00
 -12   4   5   52.19   10.50
 -11  -4   5   31.20    5.00
 -11  -4   5   26.40    7.40
 -11  -4   5   28.30    5.20
  11  -4  -5   35.00   14.40
 -11   4   5   33.40    9.40
  11   4  -5   34.20    5.90
  10  -4  -5   38.40   12.80
 -10  -4   5   21.30    4.50
 -10  -4   5   21.50    6.50
 -10  -4   5   20.50    4.00
  10   4  -5   15.70    4.80
 -10   4   5   19.10    8.30
   9  -4  -5  103.59   20.10
   9  -4  -5  132.69   16.40
  -9  -4   5  160.68   13.50
   9  -4  -5  135.69   15.50
  -9  -4   5  147.99   11.70
  -9  -4   5  139.19   11.30
  -9   4   5  127.39   21.00
   9   4  -5  124.99   11.40
  -9   4   5  179.38   15.00
  -9   4   5  128.59   15.00
   8  -4  -5  258.67   26.00
  -8  -4   5  317.17   19.70
   8  -4  -5  252.17   22.60
  -8  -4   5  311.07   19.60
  -8  -4   5  320.77   21.60
   8   4  -5  300.07   20.00
  -8   4   5  275.57   24.40
  -8   4   5  270.67   21.60
  -8   4   5  261.77   22.00
  -7  -4   5   61.09    5.60
  -7  -4   5   64.79    5.70
   7  -4  -5   40.40   10.80
  -7  -4   5   59.49    9.30
  -7  -4   5   48.50    5.70
   7  -4  -5   53.19    8.00
  -7   4   5   57.19    8.20
  -7   4   5   50.79   10.60
   7   4  -5   62.89    6.40
  -7   4   5   81.29   11.40
   6  -4  -5   15.10    4.70
   6  -4  -5   24.10    8.50
   6  -4  -5   21.10    5.60
  -6   4   5   22.10    5.90
  -6   4   5   18.80    8.10
  -6   4   5   14.30    8.10
   5  -4  -5   11.20    7.80
   5  -4  -5   -2.80    4.40
  -5  -4   5    0.40    4.20
   5  -4  -5    9.10    7.30
   5   4  -5    2.40    2.90
  -5   4   5    6.40    6.10
  -5   4   5   -7.30    7.30
  -5   4   5   -6.20    6.90
  -4  -4   5  404.66   25.40
   4  -4  -5  338.77   24.60
   4  -4  -5  332.27   26.50
   4  -4  -5  326.87   26.50
   4  -4  -5  335.57   24.60
   4   4  -5  400.56   24.40
  -4   4   5  405.26   25.40
  -4   4   5  379.76   26.70
  -3  -4   5    7.00    4.10
   3  -4  -5    3.70    4.10
   3  -4  -5   -0.40    6.20
  -3  -4   5   -0.60    1.90
   3  -4  -5   -2.00    6.30
   3   4  -5    2.60    2.80
  -3   4   5   -0.60    4.60
  -3   4   5   -7.50    6.60
  -2  -4   5   50.09    4.70
  -2  -4   5   47.90    7.30
   2  -4  -5   56.19   10.40
   2  -4  -5   43.20    7.40
   2  -4  -5   37.40    5.50
   2   4  -5   56.29    5.60
  -2   4   5   42.50    8.40
  -1  -4   5  176.58   11.60
  -1  -4   5  187.28   13.60
   1  -4  -5  142.79   14.40
  -1   4   5  191.18   12.80
  -1   4   5  149.88   15.10
  -1   4   5  156.98   11.60
   0  -4   5  695.63   50.19
   0  -4  -5  880.71   49.60
   0   4   5  798.42   49.70
   0   4   5  740.53   51.19
   0   4   5  720.93   49.70
   0   4   5  787.82   49.50
  -1  -4  -5 2113.59  145.99
   1  -4   5 2166.28  145.99
  -1  -4  -5 2363.56  145.89
  -1  -4  -5 2255.27  145.89
   1   4   5 2373.06  146.29
   1   4   5 2303.47  145.89
   1   4   5 2303.37  146.19
  -1   4  -5 2357.46  146.09
   1   4   5 2498.65  146.49
   1   4   5 2204.78  145.79
   1   4   5 2375.46  147.39
  -2  -4  -5  419.76   26.30
  -2  -4  -5  416.46   26.60
   2  -4   5  357.16   26.40
   2  -4   5  419.06   28.30
   2  -4   5  413.26   27.30
  -2  -4  -5  404.36   26.20
  -2  -4  -5  374.36   26.30
   2   4   5  391.36   26.10
   2   4   5  423.86   26.50
   2   4   5  400.76   26.50
   2   4   5  402.66   26.90
   2   4   5  395.86   26.10
   2   4   5  407.96   28.10
   2   4   5  391.76   26.50
  -3  -4  -5   18.10    3.00
  -3  -4  -5   20.60    3.30
   3  -4   5   19.80    6.00
  -3  -4  -5   20.80    3.80
   3  -4   5   24.80    8.50
   3  -4   5   13.80    3.70
   3   4   5   11.70    2.80
   3   4   5   23.40    3.70
   3   4   5   22.70    3.90
   3   4   5   20.60    3.70
   3   4   5   16.30    3.10
   3   4   5    8.00    4.00
   3   4   5   28.90    7.10
   4  -4   5   -1.20    8.70
  -4  -4  -5    1.60    3.20
  -4  -4  -5    1.80    2.30
   4  -4   5    2.60    3.50
  -4  -4  -5    1.70    3.00
  -4  -4  -5    7.50    3.40
  -4   4  -5    3.90    4.60
   4   4   5    3.10    3.40
   4   4   5    1.00    6.80
   4   4   5    4.40    4.20
   4   4   5    0.10    2.50
   4   4   5    5.30    3.20
   4   4   5    4.50    2.90
  -5  -4  -5   23.30    4.20
  -5  -4  -5   17.90    3.40
   5  -4   5   27.50    6.70
   5  -4   5   17.20    4.70
  -5  -4  -5   22.70    4.00
  -5  -4  -5   24.00    4.10
   5   4   5   25.50    4.30
   5   4   5   17.90    3.90
   5   4   5   24.30    3.80
  -5   4  -5   26.80    5.90
  -5   4  -5   16.10    6.00
   6  -4   5  215.18   18.20
  -6  -4  -5  257.67   17.90
  -6  -4  -5  278.67   18.30
   6  -4   5  247.88   21.40
  -6  -4  -5  272.77   18.00
   6   4   5  268.87   18.20
   6   4   5  260.97   17.90
  -6   4  -5  254.77   19.50
  -7  -4  -5    8.80    4.20
  -7  -4  -5    0.30    4.00
   7  -4   5   -0.10    5.20
   7  -4   5   18.10    8.40
  -7  -4  -5    7.20    4.20
  -7   4  -5    6.50    6.40
   7   4   5    1.80    3.70
   7   4   5    7.50    4.20
   7   4   5   -4.40    3.90
  -8  -4  -5  197.48   14.40
  -8  -4  -5  196.78   14.20
  -8  -4  -5  193.98   14.70
   8  -4   5  193.98   18.60
   8   4   5  164.38   13.80
   8   4   5  185.98   14.30
  -8   4  -5  190.28   17.40
   8   4   5  184.98   14.30
  -9  -4  -5   -2.00    4.90
  -9  -4  -5    6.40    4.80
   9  -4   5    1.90    9.10
  -9  -4  -5   14.40    4.40
   9   4   5    4.00    4.00
   9   4   5    8.20    4.20
  -9   4  -5   14.90    3.40
   9   4   5    7.30    4.50
  -9   4  -5    0.90   10.90
 -10  -4  -5   56.79    8.70
 -10  -4  -5   31.00    6.60
  10  -4   5   31.60   11.20
 -10  -4  -5   39.50    6.10
  10   4   5   31.20    5.80
 -10   4  -5   41.40   10.50
 -10   4  -5   45.80    6.50
  10   4   5   34.20    6.40
  11  -4   5   21.40   13.50
 -11  -4  -5   37.10    7.10
 -11  -4  -5   59.99    8.80
 -11  -4  -5   36.30    6.70
  11   4   5   26.90    6.50
  11   4   5   41.80    7.20
  11   4   5   41.40    6.80
 -11   4  -5   44.80   11.10
 -12  -4  -5    2.00    6.20
 -12  -4  -5   -3.90    5.70
 -12  -4  -5   -0.60    6.60
  12   4   5   -0.50    6.60
  12   4   5    8.10    6.60
 -13  -4  -5   -5.10    7.50
 -13  -4  -5    6.40    6.80
  13  -4   5  -14.90   13.90
 -13  -4  -5   -1.70    7.20
  13   4   5    1.50    7.20
  13   4   5   20.80    7.70
 -13  -5   5   -1.30    5.10
 -13  -5   5   -9.20    8.10
 -13  -5   5   -6.90    5.30
  13  -5  -5    9.60   21.30
  13   5  -5    5.00    6.10
 -12  -5   5   26.50    8.10
 -12  -5   5   26.50    5.60
  12  -5  -5   25.90   18.70
 -12  -5   5   34.40    5.70
  12   5  -5   39.60    6.80
  11  -5  -5    1.30   16.00
 -11  -5   5   -1.20    3.90
 -11  -5   5   -0.50    5.90
 -11  -5   5    2.40    4.30
 -11   5   5   -0.70   16.70
  11   5  -5    7.50    5.10
 -10  -5   5   42.10    5.60
 -10  -5   5   48.00    6.80
 -10  -5   5   56.29    8.40
  10  -5  -5   48.00   16.80
 -10   5   5   53.89   10.40
  10   5  -5   48.90    7.00
 -10   5   5   35.30   16.40
  -9  -5   5   16.30    3.70
   9  -5  -5   13.80   14.00
  -9  -5   5   23.00    3.90
  -9  -5   5   13.50    5.90
   9   5  -5   20.90    5.50
  -9   5   5    6.90   14.00
  -8  -5   5  346.87   20.50
  -8  -5   5  351.46   23.10
  -8  -5   5  293.47   21.00
   8  -5  -5  256.57   30.10
   8   5  -5  308.77   21.50
  -8   5   5  250.47   29.40
  -8   5   5  262.57   26.40
   7   5  -5  801.62   52.79
  -6  -5   5  111.89   11.70
   6  -5  -5  110.49   18.60
  -6  -5   5   77.29    7.40
  -6   5   5   99.39   15.70
   6   5  -5   96.09    9.20
  -5  -5   5  103.09    8.80
  -5  -5   5  129.39   12.10
   5  -5  -5  142.59   19.10
  -5   5   5  103.69   15.70
   5   5  -5  136.99   10.40
  -4  -5   5  191.78   14.30
  -4   5   5  125.09   17.40
   4   5  -5  167.68   12.90
   3  -5  -5   14.20    9.00
  -3  -5   5    5.10    5.30
  -3   5   5    2.70    9.20
   3   5  -5   12.60    4.00
   2  -5  -5   16.80    8.30
  -2  -5   5   -0.70    4.60
   2   5  -5    1.50    3.70
  -2   5   5    9.60    8.50
  -1  -5   5  360.36   27.30
  -1  -5   5  439.66   28.70
  -1   5   5  418.06   30.50
   1   5  -5  456.95   28.10
   0  -5   5  229.68   18.40
   0  -5   5  260.87   19.70
   0   5   5  292.87   19.10
   0   5  -5  266.97   18.90
   0   5   5  314.17   22.10
  -1  -5  -5  284.27   18.10
   1  -5   5  274.17   18.50
  -1  -5  -5  243.18   18.10
   1   5   5  236.58   18.90
   1   5   5  260.87   18.80
   1   5   5  289.07   21.70
  -1   5  -5  296.57   19.10
   2  -5   5  167.58   20.70
  -2  -5  -5  181.28   13.00
   2   5   5  184.88   13.30
   2   5   5  170.18   14.20
   2   5   5  185.78   16.90
  -3  -5  -5   41.90    5.20
  -3  -5  -5   35.50    4.80
   3  -5   5   24.50    5.30
   3   5   5   53.39    9.90
   3   5   5   29.10    5.00
  -3   5  -5   50.29    7.50
   3   5   5   31.60    5.20
   3   5   5   34.80    5.20
  -4  -5  -5   65.49    7.60
   4  -5   5   42.30    7.20
  -4  -5  -5   51.99    7.20
   4  -5   5   64.09   10.80
   4   5   5   65.49   12.20
   4   5   5   45.20    7.10
   4   5   5   41.30    7.10
  -4   5  -5   72.39    9.90
   4   5   5   59.39    7.50
  -5  -5  -5  512.15   35.30
  -5  -5  -5  559.34   35.40
  -5  -5  -5  562.14   35.40
   5  -5   5  546.75   38.80
   5   5   5  505.15   37.50
   5   5   5  513.65   35.40
   5   5   5  525.95   35.20
  -5   5  -5  575.34   36.50
   5   5   5  503.35   35.10
  -6  -5  -5    5.90    5.40
   6  -5   5    9.80   10.20
   6   5   5    0.20    4.10
   6   5   5    3.20    4.60
   6   5   5    8.70    9.20
   6   5   5    2.80    4.40
  -7  -5  -5   49.20    8.00
  -7  -5  -5   42.60    6.30
   7  -5   5   37.50   12.70
  -7  -5  -5   49.80    6.30
   7   5   5   41.50    6.60
   7   5   5   48.80    6.30
  -7   5  -5   58.39    9.60
  -8  -5  -5  263.27   18.60
  -8  -5  -5  250.57   18.00
  -8  -5  -5  251.97   18.50
  -8   5  -5  235.48   21.00
   8   5   5  220.58   17.60
   8   5   5  236.48   18.20
   8   5   5  246.78   18.10
  -9  -5  -5   11.30    5.70
  -9  -5  -5    9.60    5.50
   9  -5   5    7.00   13.00
  -9  -5  -5    2.80    5.60
  -9   5  -5   16.10   13.30
   9   5   5   10.10    5.20
   9   5   5    9.60    5.70
  10  -5   5   58.59   15.20
 -10  -5  -5   94.09   11.20
 -10  -5  -5   79.09   10.50
 -10  -5  -5   85.99   11.30
  10   5   5   83.09   10.80
 -10   5  -5   89.29   16.70
  10   5   5   85.99   11.10
 -11  -5  -5  115.19   12.20
  11  -5   5   92.49   19.40
 -11  -5  -5  108.49   12.70
 -11  -5  -5  114.39   13.00
  11   5   5   97.39   13.20
 -11   5  -5   87.09   17.30
  11   5   5  116.69   12.70
 -12  -5  -5   56.99    9.40
 -12  -5  -5   48.50    8.60
 -12  -5  -5   56.49    9.20
  12   5   5   48.60    9.00
  12   5   5   44.60    8.80
  11  -6  -5    5.10   21.00
 -11  -6   5   -0.70    4.30
 -11  -6   5    1.30    7.10
  11   6  -5    0.70    6.10
 -10  -6   5    0.20    4.40
  10  -6  -5   -3.10   18.20
 -10  -6   5   -9.40    6.90
  10   6  -5    4.10    5.80
 -10   6   5    8.00   17.20
  -9  -6   5   26.80    7.30
   9  -6  -5    4.70   17.00
  -9   6   5   23.30   16.20
   9   6  -5   17.00    6.10
  -8  -6   5   45.30    7.90
   8  -6  -5   35.30   16.90
   8   6  -5   35.10    6.70
  -8   6   5   26.20   15.60
   7  -6  -5   10.00   14.50
  -7  -6   5   -0.50    5.90
  -7   6   5    9.10   13.90
   7   6  -5    3.20    5.10
  -6  -6   5    7.50    6.20
   6  -6  -5   27.10   13.40
  -6   6   5    8.00   13.20
   6   6  -5    2.80    5.00
   5  -6  -5   37.00   12.70
  -5  -6   5    0.50    6.50
  -5   6   5   10.20   12.30
   5   6  -5   10.60    5.20
   4  -6  -5   41.60   12.40
  -4  -6   5   10.00    6.90
  -4   6   5   44.10   12.20
  -3  -6   5    3.60    6.10
   3   6  -5    4.50    4.60
  -2  -6   5   63.89   10.70
   2   6  -5   48.20    6.80
  -2   6   5   35.80   16.00
  -1  -6   5   94.19   12.80
   1   6  -5   96.69   10.40
  -1   6   5  106.49   15.90
   0  -6   5  651.43   47.80
   0   6  -5  790.42   47.60
   0   6   5  716.03   49.90
  -1  -6  -5    5.70    3.70
   1   6   5    2.00    5.70
   1   6   5    9.80    5.30
   1   6   5   17.10   10.20
  -1   6  -5    5.30    9.90
  -1   6  -5    0.40    6.00
  -2  -6  -5   63.29    7.70
  -2   6  -5   98.89   13.80
   2   6   5   89.69   13.60
   2   6   5   60.19    9.00
   3  -6   5   16.90   12.60
  -3  -6  -5   18.60    4.30
  -3   6  -5   19.00    9.20
   3   6   5   24.80    9.50
   3   6   5   15.00    5.80
  -4  -6  -5   35.70    5.90
   4  -6   5   31.80   13.50
  -4  -6  -5   26.80    5.20
   4   6   5   36.90    5.90
   4   6   5   45.40   12.60
   4   6   5   28.70    6.20
  -5  -6  -5   55.19    9.20
  -5  -6  -5   57.29    8.50
   5  -6   5   78.99   15.20
   5   6   5   57.59    9.40
   5   6   5   61.69    7.90
  -5   6  -5   54.19   12.70
   5   6   5   87.79   15.80
  -6  -6  -5    6.30    4.90
  -6  -6  -5    4.10    5.70
   6  -6   5   -5.40   13.20
   6   6   5   -2.50    5.30
   6   6   5    4.10   11.60
   6   6   5    6.30    5.60
  -6   6  -5   19.50    8.40
  -7  -6  -5    6.60    5.50
  -7  -6  -5   -6.60    5.80
   7   6   5   -7.30    5.70
   7   6   5    1.30   11.70
   7   6   5   -0.60    5.50
  -8  -6  -5   -2.50    6.60
   8  -6   5  -10.50   16.80
  -8  -6  -5    4.40    5.80
  -8  -6  -5    2.40    5.70
   8   6   5    6.80    5.80
   8   6   5   -2.10    6.40
  -9  -6  -5    9.90    7.30
   9  -6   5   19.80   19.60
  -9  -6  -5   12.90    6.50
  -9  -6  -5   20.20    6.50
   9   6   5    9.50    6.80
  -9   6  -5   18.60   10.30
   9   6   5    9.10    6.80
  10  -6   5   22.90   19.50
 -10  -6  -5   72.19   11.40
 -10  -6  -5   83.79   12.70
 -10  -6  -5   49.00    8.50
  10   6   5   62.19    9.20
  10   6   5   35.80   16.60
  10   6   5   44.60    8.90
 -10  -7   5   -5.00    9.80
  -9  -7   5   -0.60    6.90
   9  -7  -5   10.10   21.00
   9   7  -5    4.10    6.30
   8  -7  -5   30.00   20.60
  -8  -7   5   24.90    8.00
   8   7  -5   25.80    6.80
  -8   7   5   10.20   19.40
  -7  -7   5   32.00    8.30
   7  -7  -5   41.00   19.40
  -7   7   5   12.30   16.70
   7   7  -5   31.70    7.10
  -6  -7   5   26.00    7.90
   6  -7  -5    8.80   17.70
   6   7  -5   15.00    6.40
  -6   7   5   20.50   15.60
  -5  -7   5   38.90    9.00
   5  -7  -5   68.79   18.00
  -5   7   5   34.20   15.80
   5   7  -5   44.70    7.60
   4  -7  -5    3.70   15.30
  -4  -7   5    7.50    7.20
   4   7  -5    2.20    6.00
  -4   7   5   11.90   14.50
  -3  -7   5   24.30    8.00
   3  -7  -5   32.10   15.70
  -3   7   5   26.70   15.30
   3   7  -5   23.00    6.60
  -2  -7   5   65.19   10.60
   2   7  -5   56.79    8.30
  -2   7   5   70.79   15.90
  -1  -7   5  199.68   27.40
  -1  -7   5  148.99   17.80
   1  -7  -5  204.88   27.60
   1   7  -5  182.58   16.00
  -1   7   5  173.98   22.00
   0  -7   5   20.80    7.60
   0  -7   5   44.80   17.10
   0   7   5   14.50   13.30
   1  -7   5  175.68   27.10
  -1  -7  -5   85.39   10.00
   1   7   5  127.29   12.90
   1   7   5  134.49   19.00
  -1   7  -5  127.69   18.90
   2  -7   5   20.90   16.00
  -2  -7  -5    5.80    4.80
   2   7   5   12.90   13.20
  -2   7  -5   24.40   13.30
   2   7   5   10.80    7.30
   3  -7   5   -0.70   17.00
  -3  -7  -5   -5.10    4.70
  -3   7  -5   -4.50    8.20
   3   7   5   -0.80    7.00
   3   7   5    7.70   13.10
  -4  -7  -5   20.00    5.60
   4   7   5   23.30    7.10
  -4   7  -5   35.70   13.30
   4   7   5   34.70   15.30
  -5  -7  -5   17.00    6.90
   5  -7   5   29.90   16.90
   5   7   5   31.20   14.90
   5   7   5   20.60    7.00
  -6  -7  -5   28.10    6.40
  -6  -7  -5   28.60    7.40
   6  -7   5   29.90   19.60
   6   7   5   21.70    7.80
   6   7   5   66.19   16.50
  -7  -7  -5   -2.30    6.00
  -7  -7  -5   -8.70    6.90
   7   7   5    1.10    7.20
  -7   7  -5  -10.70   10.80
  -8  -7  -5   86.09   13.20
  -8  -7  -5   64.79   11.60
   8   7   5  104.79   18.90
   8   7   5   61.19   10.10
  -9  -7  -5   21.70   10.20
  -9  -7  -5   27.80    7.90
   9   7   5    4.60    8.30
  -7  -8   5    1.40    8.50
   7  -8  -5  -23.50   23.60
  -7   8   5  -43.00   26.90
   7   8  -5   -2.40    7.60
  -6  -8   5    1.00    8.70
   6  -8  -5   -4.20   22.80
   6   8  -5    5.40    7.20
  -6   8   5   -0.60   20.90
   5  -8  -5    8.70   19.40
  -5  -8   5   34.60    9.70
  -5   8   5   13.60   19.10
   5   8  -5   29.80    7.70
  -4  -8   5   46.80   10.20
   4  -8  -5   61.69   21.20
  -4   8   5   63.49   20.20
   4   8  -5   47.50    9.30
  -3  -8   5   32.10   10.40
   3  -8  -5   45.90   21.00
  -3   8   5   54.59   19.80
   3   8  -5   41.60    8.80
   2  -8  -5   14.80   20.80
  -2  -8   5   28.00    9.70
   2   8  -5   47.70    9.40
   2   8  -5   23.70   18.30
  -2   8   5   30.50   18.00
  -1  -8   5    0.00    9.50
   1  -8  -5    3.80   20.00
   1   8  -5    2.70   10.00
  -1   8   5   15.90   17.00
   0   8  -5  -13.00   20.60
   0   8   5    0.80   16.50
   0   8  -5   14.40   10.50
   1   8   5   24.40   16.50
  -1   8  -5   32.10   24.60
   2  -8   5   14.20   23.40
   2   8   5    8.20    9.10
   2   8   5   16.40   16.40
   3  -8   5  -15.30   22.90
  -3  -8  -5    2.10    5.60
   3   8   5    4.90    9.10
   3   8   5   25.50   17.10
   4   8   5    4.70   17.50
   4   8   5   11.30    9.00
   5   8   5   23.70    9.30
   5   8   5   36.50   19.10
  -6  -8  -5    0.60    7.10
   6  -8   5    5.50   23.60
   6   8   5   -0.90    8.70
   6   8   5    8.60   18.80
 -15   0   6   35.20   11.50
 -15   0   6   59.39    9.90
  15   0  -6   34.10    9.70
 -14   0   6   -8.90    7.30
  14   0  -6   -6.20    7.00
 -14   0   6   18.50    7.90
  13   0  -6   56.29    8.80
 -13   0   6   57.69    8.80
 -13   0   6   50.09    8.40
 -12   0   6    0.10    6.60
  12   0  -6   10.80    6.50
 -12   0   6    1.00    6.60
 -11   0   6  184.98   16.70
 -11   0   6  214.28   16.60
  11   0  -6  214.18   17.30
  11   0  -6  203.18   19.50
 -10   0   6  729.03   47.60
 -10   0   6  703.33   47.40
  10   0  -6  756.12   47.60
  10   0  -6  690.43   48.20
   9   0  -6 1200.68   74.39
   9   0  -6 1076.29   74.69
  -9   0   6 1047.50   74.99
  -9   0   6 1207.48   74.39
  -9   0   6 1225.98   74.39
   9   0  -6 1159.28   74.69
   8   0  -6   23.20    5.30
  -8   0   6   27.60    4.90
   8   0  -6   28.10    5.00
  -8   0   6   20.30    5.40
  -8   0   6   32.20    5.10
   8   0  -6   28.20    5.60
   7   0  -6  186.08   13.30
   7   0  -6  150.78   12.90
  -7   0   6  156.68   13.20
  -7   0   6  164.18   12.70
   7   0  -6  182.18   12.70
  -7   0   6  162.58   12.80
   6   0  -6 1861.81  114.59
  -6   0   6 1730.83  114.59
   6   0  -6 1774.42  114.79
  -6   0   6 1691.83  114.69
  -6   0   6 1878.51  114.69
  -6   0   6 1926.91  114.69
   6   0  -6 1741.93  114.79
  -5   0   6 4339.17  270.07
  -5   0   6 4025.50  269.97
  -5   0   6 4494.55  270.07
   5   0  -6 4291.97  270.07
  -5   0   6 3918.51  269.87
   5   0  -6 4559.44  269.97
   5   0  -6 4221.88  270.07
  -4   0   6  579.64   38.50
  -4   0   6  601.24   38.50
   4   0  -6  576.24   38.50
   4   0  -6  601.94   38.60
   4   0  -6  612.74   38.70
  -3   0   6  427.36   28.40
   3   0  -6  434.36   28.60
   3   0  -6  436.96   28.40
  -3   0   6  441.36   28.80
   2   0  -6  347.97   22.60
  -2   0   6  338.27   22.60
   2   0  -6  353.66   23.00
  -2   0   6  336.57   23.00
  -1   0   6  166.68   11.80
   1   0  -6  166.88   11.80
  -1   0   6  173.98   11.80
   1   0  -6  173.98   11.60
   0   0   6  259.57   16.90
   0   0  -6  271.77   16.80
   0   0   6  236.08   17.10
   1   0   6 2863.61  180.48
   1   0   6 2857.61  180.48
  -1   0  -6 2896.11  180.48
   1   0   6 2648.73  180.68
   1   0   6 3157.28  180.68
   1   0   6 2691.13  180.48
   2   0   6  209.38   13.30
  -2   0  -6  193.48   13.20
   2   0   6  206.88   13.10
  -2   0  -6  189.38   13.20
   2   0   6  185.88   13.20
   2   0   6  195.48   13.10
  -2   0  -6  200.88   13.10
  -2   0  -6  199.48   13.10
  -2   0  -6  211.48   13.40
   2   0   6  190.18   13.20
  -3   0  -6 1807.62  121.49
   3   0   6 1980.10  121.39
  -3   0  -6 1697.53  121.49
  -3   0  -6 2003.20  121.49
  -3   0  -6 2012.10  121.59
   3   0   6 1731.83  121.29
   3   0   6 1984.00  121.49
   3   0   6 1971.80  121.39
   3   0   6 1944.61  121.49
   3   0   6 2030.40  121.49
   4   0   6 2900.71  179.48
   4   0   6 2897.71  179.38
  -4   0  -6 2737.03  179.38
  -4   0  -6 2798.02  179.38
  -4   0  -6 2674.73  179.38
   4   0   6 3054.89  179.38
   4   0   6 2770.92  179.38
  -4   0  -6 2901.81  179.58
   4   0   6 2644.24  179.38
   4   0   6 2960.80  179.48
   5   0   6 1774.22  113.69
   5   0   6 1858.51  113.79
  -5   0  -6 1725.43  113.79
   5   0   6 1790.32  113.59
   5   0   6 1845.92  113.69
   5   0   6 1683.23  113.69
  -5   0  -6 1740.03  113.79
  -5   0  -6 1788.22  113.69
  -5   0  -6 1743.13  113.59
   5   0   6 1964.00  113.69
   6   0   6   44.50    5.00
   6   0   6   29.00    4.50
  -6   0  -6   35.70    4.20
  -6   0  -6   36.90    4.60
  -6   0  -6   41.30    4.90
   6   0   6   33.50    4.60
  -6   0  -6   33.40    5.20
   6   0   6   39.50    5.40
   6   0   6   33.60    4.60
   7   0   6  189.28   13.60
  -7   0  -6  201.98   13.60
  -7   0  -6  195.18   13.20
   7   0   6  187.68   14.00
   7   0   6  189.88   13.60
   7   0   6  215.18   13.70
  -7   0  -6  157.98   13.80
   7   0   6  203.88   13.40
  -7   0  -6  170.48   13.20
   8   0   6  172.98   14.00
   8   0   6  188.88   13.50
  -8   0  -6  179.08   13.80
  -8   0  -6  200.88   13.20
   8   0   6  193.28   13.70
  -8   0  -6  183.38   13.20
   8   0   6  164.38   14.40
   8   0   6  206.18   14.10
   9   0   6  184.68   15.70
  -9   0  -6  199.38   14.60
   9   0   6  195.08   15.60
  -9   0  -6  192.18   15.30
   9   0   6  218.08   15.70
   9   0   6  212.58   14.90
  -9   0  -6  211.98   14.60
 -10   0  -6  686.43   43.60
  10   0   6  618.34   44.70
 -10   0  -6  680.33   43.50
  10   0   6  700.83   43.70
  10   0   6  750.82   44.40
 -10   0  -6  564.14   44.00
  11   0   6   18.10    5.70
 -11   0  -6   19.70    4.70
  11   0   6   24.60    8.40
 -11   0  -6   14.80    5.90
 -11   0  -6   21.40    5.30
 -12   0  -6    5.60    4.60
  12   0   6   10.60    6.30
 -12   0  -6   15.50    5.70
 -12   0  -6    6.60    5.80
  12   0   6    9.50    5.30
 -13   0  -6    1.40    5.30
  13   0   6    0.80    6.00
 -13   0  -6    0.30    8.90
  13   0   6    1.50    6.70
 -14   0  -6    2.00   11.40
  14   0   6   27.30    9.00
  14   0   6   18.30    7.20
 -14   0  -6   10.70    6.50
 -15  -1   6   15.30    8.70
  15  -1  -6   15.60   10.00
 -15  -1   6    5.70    8.60
 -15  -1   6   14.50    7.50
 -15   1   6   48.20   10.20
  15   1  -6   27.10    8.70
 -14  -1   6   -0.40    7.30
 -14  -1   6   -1.00    7.00
 -14  -1   6    1.40    6.40
  14  -1  -6   12.90    8.80
 -14   1   6    1.90    8.00
 -14   1   6    9.00    9.60
  14   1  -6   18.50    7.60
 -13  -1   6   78.69   10.50
 -13  -1   6   68.09   11.10
  13  -1  -6   77.49   11.00
  13   1  -6   97.29   12.00
 -13   1   6   73.89   10.90
 -13   1   6   71.99    9.80
  12  -1  -6    7.00   12.80
 -12  -1   6    7.90    5.70
 -12  -1   6   17.90    5.80
  12  -1  -6   14.60    8.10
 -12  -1   6   14.80    5.90
 -12   1   6   25.40    7.70
  12   1  -6   29.80    6.30
 -12   1   6   12.30    6.80
 -11  -1   6   84.09   10.90
  11  -1  -6  113.09   14.00
 -11  -1   6   97.89   11.20
 -11  -1   6  114.39   11.00
  11  -1  -6  112.09   17.40
 -11   1   6   88.99   12.60
 -11   1   6  113.29   12.50
  11   1  -6  112.19   10.90
  10  -1  -6  232.28   19.80
 -10  -1   6  230.18   17.90
 -10  -1   6  258.37   18.00
 -10  -1   6  229.88   17.50
  10  -1  -6  246.38   20.60
  10  -1  -6  220.08   21.70
 -10   1   6  208.08   18.30
 -10   1   6  201.98   18.60
  10   1  -6  270.87   19.50
  10   1  -6  263.07   17.40
  -9  -1   6  301.67   21.10
  -9  -1   6  322.37   21.10
   9  -1  -6  282.97   23.20
   9  -1  -6  259.77   22.90
  -9  -1   6  278.57   22.40
  -9  -1   6  301.37   21.20
   9  -1  -6  316.67   22.60
   9   1  -6  305.97   21.80
  -9   1   6  272.07   21.70
  -9   1   6  292.87   21.50
   9   1  -6  347.87   20.90
   8  -1  -6  307.27   21.90
  -8  -1   6  283.07   20.90
  -8  -1   6  308.27   20.80
   8  -1  -6  310.57   22.10
   8  -1  -6  281.87   21.50
  -8  -1   6  317.27   20.90
  -8  -1   6  290.47   21.50
  -8   1   6  301.97   21.10
  -8   1   6  304.67   21.50
   8   1  -6  283.57   21.30
   8   1  -6  316.87   20.50
   8   1  -6  296.37   21.10
  -7  -1   6   19.70    4.10
   7  -1  -6   15.30    5.20
   7  -1  -6   20.00    4.80
   7  -1  -6    9.80    4.90
  -7  -1   6   17.60    3.90
  -7  -1   6   13.70    4.10
  -7  -1   6   11.90    4.20
   7   1  -6   13.90    4.20
  -7   1   6   12.30    4.40
  -7   1   6    8.60    5.60
  -7   1   6   13.30    4.50
   7   1  -6   15.30    4.30
   7   1  -6   14.70    3.20
  -6  -1   6  258.07   16.80
   6  -1  -6  266.07   17.80
   6  -1  -6  223.08   18.30
  -6  -1   6  249.08   16.80
   6  -1  -6  231.48   17.20
  -6  -1   6  229.48   17.20
  -6  -1   6  246.28   16.80
  -6   1   6  218.78   17.50
  -6   1   6  252.57   17.40
   6   1  -6  228.18   16.80
  -6   1   6  252.37   17.30
   6   1  -6  255.17   16.40
   6   1  -6  222.08   16.90
   5  -1  -6  352.96   24.70
  -5  -1   6  370.96   24.30
  -5  -1   6  372.46   24.60
   5  -1  -6  420.86   25.20
  -5  -1   6  360.06   24.50
  -5  -1   6  364.86   24.80
   5  -1  -6  371.96   24.80
  -5   1   6  370.86   25.40
   5   1  -6  378.76   24.60
  -5   1   6  346.07   25.00
   5   1  -6  356.56   24.60
  -5   1   6  374.06   24.80
  -4  -1   6  837.12   55.89
   4  -1  -6  849.72   55.79
  -4  -1   6  870.71   55.59
   4  -1  -6  835.72   55.79
  -4  -1   6  880.31   55.69
   4  -1  -6  951.10   56.19
  -4   1   6  876.51   55.89
  -4   1   6  912.11   55.99
  -4   1   6  804.22   55.89
   4   1  -6  853.71   55.69
   4   1  -6  883.91   55.79
  -3  -1   6  271.77   18.50
  -3  -1   6  271.97   18.50
   3  -1  -6  282.07   18.80
   3  -1  -6  313.87   19.10
   3  -1  -6  268.37   18.70
  -3   1   6  261.07   18.60
  -3   1   6  273.47   18.90
   3   1  -6  276.37   18.60
  -3   1   6  267.17   19.40
   3   1  -6  293.37   18.60
  -2  -1   6  130.09    9.90
  -2  -1   6  136.59    9.90
   2  -1  -6  124.59   10.20
   2  -1  -6  125.39    9.90
   2   1  -6  148.89    9.80
  -2   1   6  130.59   10.10
  -2   1   6  137.19   10.10
   2   1  -6  152.68    9.90
  -1  -1   6  301.67   19.40
   1  -1  -6  282.77   19.40
   1  -1  -6  288.27   19.50
  -1  -1   6  303.87   19.40
  -1   1   6  272.77   19.50
   1   1  -6  328.97   19.30
  -1   1   6  289.97   19.20
   0  -1  -6 6062.79  380.86
   0  -1  -6 5523.65  380.96
   0  -1   6 6036.30  380.76
   0   1   6 6030.10  380.86
   0   1   6 6066.39  380.96
   0   1  -6 6583.14  380.76
   0   1   6 5875.21  380.86
   1  -1   6  389.46   22.20
  -1  -1  -6  338.47   22.10
  -1  -1  -6  333.47   22.20
   1  -1   6  310.67   21.90
  -1  -1  -6  338.97   22.10
  -1  -1  -6  360.96   22.10
   1  -1   6  339.07   21.90
   1   1   6  339.77   22.00
   1   1   6  310.17   22.10
   1   1   6  333.17   22.00
   1   1   6  351.16   22.00
   1   1   6  314.07   22.10
  -1   1  -6  352.36   21.90
  -2  -1  -6 3534.15  220.98
   2  -1   6 3495.35  220.88
   2  -1   6 3399.56  220.98
  -2  -1  -6 3468.25  221.08
   2  -1   6 3643.04  221.08
   2  -1   6 3339.47  220.88
  -2  -1  -6 3295.27  220.98
   2  -1   6 3569.84  221.08
  -2  -1  -6 3504.55  221.08
  -2  -1  -6 3650.23  221.08
  -2  -1  -6 3606.54  221.08
  -2   1  -6 3398.06  220.88
  -2   1  -6 3452.65  220.88
   2   1   6 3557.74  221.08
   2   1   6 3585.44  220.98
   2   1   6 3369.86  221.08
   2   1   6 3624.24  220.98
  -2   1  -6 3393.46  220.88
   3  -1   6   54.09    4.30
  -3  -1  -6   54.99    4.70
  -3  -1  -6   48.40    4.60
   3  -1   6   53.69    4.40
   3  -1   6   49.99    4.50
  -3  -1  -6   58.19    4.60
   3  -1   6   44.70    4.40
   3  -1   6   62.09    4.90
  -3  -1  -6   49.99    4.50
   3   1   6   51.89    4.90
   3   1   6   54.69    4.90
   3   1   6   50.09    4.90
  -3   1  -6   57.39    4.40
  -3   1  -6   51.89    4.80
   3   1   6   56.09    4.50
   3   1   6   51.49    4.70
  -4  -1  -6  214.18   15.00
   4  -1   6  230.28   15.10
   4  -1   6  213.78   14.90
   4  -1   6  223.88   15.00
  -4  -1  -6  228.68   15.10
   4  -1   6  222.28   14.90
   4  -1   6  222.08   15.00
  -4  -1  -6  221.58   15.20
   4  -1   6  227.08   14.90
  -4  -1  -6  232.68   15.10
  -4   1  -6  210.48   14.90
   4   1   6  228.78   15.40
   4   1   6  247.18   15.10
  -4   1  -6  222.08   14.90
   4   1   6  220.78   15.10
   4   1   6  227.78   15.10
   4   1   6  248.58   15.00
  -4   1  -6  226.18   15.30
   4   1   6  231.38   15.40
   5  -1   6  914.81   60.79
  -5  -1  -6  919.71   60.89
   5  -1   6  922.01   60.69
   5  -1   6  960.80   60.89
  -5  -1  -6  933.41   60.79
   5  -1   6  947.41   60.69
  -5  -1  -6  974.80   60.79
   5  -1   6  926.21   60.79
   5  -1   6  996.50   60.89
  -5  -1  -6  938.31   60.89
   5   1   6  999.20   61.09
  -5   1  -6  965.00   60.69
   5   1   6  971.30   60.89
   5   1   6  973.60   60.79
   5   1   6  955.20   61.09
  -5   1  -6  970.00   60.69
  -5   1  -6  958.30   60.99
   5   1   6  987.30   60.79
  -5   1  -6  903.91   60.99
   5   1   6  944.21   60.89
  -6  -1  -6  116.69    8.40
   6  -1   6  101.89    8.30
   6  -1   6  115.39    8.70
   6  -1   6  109.19    8.30
   6  -1   6  106.09    8.70
   6  -1   6  107.09    8.40
  -6  -1  -6  100.79    8.30
  -6  -1  -6  110.49    8.50
  -6  -1  -6  105.99    8.20
   6   1   6  110.69    8.40
   6   1   6  107.89    8.40
  -6   1  -6  115.59    8.00
  -6   1  -6  101.79    8.10
   6   1   6  105.49    9.10
   6   1   6  106.29    8.50
  -6   1  -6   97.49    9.20
   6   1   6  112.49    8.30
   6   1   6  114.69    8.80
  -6   1  -6  115.29    8.70
   7  -1   6    2.80    3.60
  -7  -1  -6   -4.40    2.40
   7  -1   6   -1.40    3.20
   7  -1   6   -4.50    2.70
  -7  -1  -6   -4.80    2.60
   7  -1   6   -4.30    3.20
   7  -1   6   -1.70    3.40
  -7  -1  -6    1.00    2.60
  -7  -1  -6    1.10    3.20
   7   1   6    3.60    4.00
  -7   1  -6   -3.60    2.50
   7   1   6    1.30    3.10
  -7   1  -6   -1.30    2.40
   7   1   6   -1.20    2.80
  -7   1  -6    2.70    2.80
   7   1   6   -2.00    3.40
   7   1   6   -1.50    2.70
  -8  -1  -6  103.39    8.60
   8  -1   6   95.29    9.40
   8  -1   6  107.89    9.90
   8  -1   6  106.09    9.70
  -8  -1  -6  121.19    8.70
  -8  -1  -6  109.19    9.00
   8   1   6  104.69    9.60
  -8   1  -6  110.49   10.10
  -8   1  -6   88.79    8.60
   8   1   6  107.39    9.70
   8   1   6  113.79    8.90
  -8   1  -6  110.99    8.60
  -8   1  -6  103.89    9.40
   8   1   6  104.39    9.50
  -8   1  -6   87.19   12.40
   8   1   6  116.39    8.10
   9  -1   6  679.43   44.80
  -9  -1  -6  711.33   44.30
   9  -1   6  606.64   45.00
  -9  -1  -6  686.53   44.20
   9  -1   6  621.14   45.10
  -9  -1  -6  687.03   44.50
   9   1   6  699.13   44.30
   9   1   6  703.73   44.80
  -9   1  -6  642.14   44.30
  -9   1  -6  671.23   44.90
   9   1   6  684.33   44.70
  -9   1  -6  713.73   44.90
  -9   1  -6  661.43   44.10
   9   1   6  744.33   43.80
  10  -1   6   69.39   11.90
 -10  -1  -6   90.39    9.20
  10  -1   6   98.99   10.60
  10  -1   6   79.89   11.70
 -10  -1  -6   96.59    9.20
 -10  -1  -6   79.09    8.60
 -10   1  -6   79.89    8.70
  10   1   6   77.19    9.20
  10   1   6   82.39   11.10
 -10   1  -6   84.49   10.80
  10   1   6   90.79    7.90
 -10   1  -6   74.29    8.80
  11  -1   6    0.90    5.40
 -11  -1  -6    5.30    4.90
 -11  -1  -6   -0.90    5.10
  11   1   6   -3.80    4.40
 -11   1  -6    6.50    4.30
  11   1   6    2.50    4.00
 -11   1  -6    0.10    6.40
  11   1   6    2.80    8.40
  11   1   6   11.20    5.70
 -11   1  -6    4.50    4.50
 -12  -1  -6   -5.20    4.50
  12  -1   6    2.80    6.30
 -12  -1  -6   -2.80    5.40
 -12  -1  -6    6.60    5.10
  12  -1   6   -7.80    5.20
 -12   1  -6   -5.10    4.90
  12   1   6   -2.40    5.00
  12   1   6    2.80    4.30
  12   1   6    7.60    6.40
 -13  -1  -6    2.80    7.50
 -13  -1  -6    8.50    5.70
  13  -1   6   15.60    6.30
  13  -1   6    8.90    6.80
 -13  -1  -6    9.10    6.20
  13   1   6   12.30    6.30
  13   1   6   11.10    5.20
 -13   1  -6    4.10    8.80
 -13   1  -6    2.10    5.80
  13   1   6   16.00    7.30
 -14  -1  -6   28.20    6.70
  14  -1   6   21.30    9.70
 -14  -1  -6   20.00    8.10
  14  -1   6   19.60    7.40
 -14   1  -6   17.90    7.40
 -14   1  -6    1.50   15.30
  14   1   6   28.60    8.50
  14   1   6   23.00    6.50
  14   1   6   26.90    8.10
  15  -2  -6   -6.10   12.00
 -15  -2   6   -7.20    9.20
 -15  -2   6    6.90    7.70
 -15  -2   6    5.80    6.60
  15   2  -6    7.30    8.30
 -15   2   6    3.60    9.90
 -14  -2   6   14.40    6.90
 -14  -2   6    6.10    5.90
 -14  -2   6   -3.00    8.40
  14  -2  -6  -19.50   10.90
 -14   2   6    3.50    9.30
  14   2  -6   10.60    6.80
 -13  -2   6   18.30    5.80
 -13  -2   6    5.30    7.10
 -13  -2   6   12.10    5.70
  13  -2  -6   -0.20   10.30
 -13   2   6   10.20    7.90
 -13   2   6    8.00   10.50
  13   2  -6    9.30    6.00
 -12  -2   6   41.70    7.70
 -12  -2   6   57.69    8.50
  12  -2  -6   50.39   11.00
 -12   2   6   73.89   17.10
 -12   2   6   55.89    9.20
 -12   2   6   47.60    9.40
 -11  -2   6    4.60    4.60
 -11  -2   6    0.30    4.60
  11  -2  -6   -1.40    8.50
 -11  -2   6    5.00    5.50
  11  -2  -6   15.60   10.60
  11   2  -6    8.20    4.40
 -11   2   6   -2.80    6.90
 -11   2   6   10.10    6.70
 -10  -2   6   99.49   11.20
 -10  -2   6  116.69   11.10
  10  -2  -6  117.59   18.00
 -10  -2   6  136.29   12.70
  10  -2  -6  144.59   17.80
 -10   2   6  166.58   18.00
  10   2  -6  147.39   11.40
 -10   2   6  106.39   13.60
   9  -2  -6  965.70   67.79
  -9  -2   6 1146.49   66.79
  -9  -2   6  989.90   67.09
  -9  -2   6 1114.09   66.69
   9  -2  -6  956.30   67.99
  -9  -2   6 1089.09   67.39
   9  -2  -6  999.30   68.29
  -9   2   6  970.00   67.49
   9   2  -6 1100.39   66.59
  -9   2   6 1052.59   68.89
  -9   2   6  993.20   67.19
   8  -2  -6  169.98   15.70
  -8  -2   6  205.28   13.50
  -8  -2   6  177.18   13.60
   8  -2  -6  172.68   16.80
  -8  -2   6  192.18   13.70
  -8  -2   6  188.88   14.60
  -8   2   6  182.48   16.30
   8   2  -6  180.48   14.40
  -8   2   6  158.58   16.00
   8   2  -6  184.78   15.50
  -8   2   6  180.58   15.00
   8   2  -6  190.58   13.30
  -7  -2   6 1139.79   74.09
   7  -2  -6 1130.99   74.59
  -7  -2   6 1208.78   74.09
   7  -2  -6 1088.49   75.19
   7  -2  -6 1096.29   74.59
  -7  -2   6 1172.38   74.69
  -7  -2   6 1227.98   74.09
   7   2  -6 1109.69   74.39
   7   2  -6 1183.98   74.39
   7   2  -6 1115.49   73.89
  -7   2   6 1199.08   74.59
  -7   2   6 1159.68   75.29
  -7   2   6 1221.58   74.69
  -6  -2   6 1045.40   64.29
   6  -2  -6 1004.60   65.49
   6  -2  -6  986.20   64.69
  -6  -2   6  995.20   64.89
  -6  -2   6 1033.70   64.29
   6  -2  -6  975.10   64.69
   6   2  -6  981.10   63.99
  -6   2   6 1084.99   64.79
  -6   2   6 1057.09   64.79
  -6   2   6  877.41   65.09
   6   2  -6  994.80   64.49
   6   2  -6 1009.50   64.49
   5  -2  -6  250.97   20.20
   5  -2  -6  285.47   18.50
  -5  -2   6  239.68   18.90
   5  -2  -6  294.37   18.70
  -5  -2   6  259.07   18.00
  -5  -2   6  255.47   17.90
   5   2  -6  265.07   18.20
  -5   2   6  296.67   19.10
   5   2  -6  265.77   18.30
  -5   2   6  246.58   19.50
  -5   2   6  284.57   18.90
  -4  -2   6  588.54   37.70
   4  -2  -6  594.94   38.10
  -4  -2   6  547.15   38.40
   4  -2  -6  567.44   38.80
   4  -2  -6  620.14   38.20
  -4  -2   6  584.94   37.70
  -4   2   6  586.64   38.40
   4   2  -6  598.54   37.90
  -4   2   6  589.64   38.30
   4   2  -6  585.64   37.80
   4   2  -6  571.74   37.50
  -3  -2   6   33.80    4.50
  -3  -2   6   24.80    4.00
   3  -2  -6   16.60    4.70
   3  -2  -6   26.50    3.90
  -3   2   6   32.30    4.50
   3   2  -6   24.50    3.00
   3   2  -6   27.10    4.30
   3   2  -6   34.20    4.40
  -3   2   6   27.90    4.20
   2  -2  -6  223.08   15.70
   2  -2  -6  214.48   14.70
   2  -2  -6  201.78   14.50
   2   2  -6  237.38   14.10
  -2   2   6  212.18   15.60
  -2   2   6  191.28   15.70
  -2   2   6  208.98   14.90
   1  -2  -6  237.68   15.80
  -1  -2   6  212.88   15.40
   1  -2  -6  213.58   15.70
   1  -2  -6  239.88   15.90
   1   2  -6  246.88   15.60
  -1   2   6  253.67   16.10
  -1   2   6  246.38   16.70
   0  -2  -6 1112.29   70.19
   0  -2  -6 1100.89   69.99
   0  -2  -6 1128.29   70.19
   0  -2   6 1012.30   69.79
   0  -2  -6  937.91   70.19
   0  -2   6 1205.98   70.29
   0   2   6 1112.49   70.29
   0   2   6 1160.58   70.29
   0   2   6 1099.29   70.09
   0   2   6 1128.69   70.69
   0   2   6 1119.59   69.99
  -1  -2  -6  666.23   44.10
   1  -2   6  675.63   44.20
  -1  -2  -6  676.93   44.00
  -1  -2  -6  699.83   44.10
  -1  -2  -6  726.43   44.10
   1   2   6  696.93   44.00
   1   2   6  657.93   44.10
   1   2   6  708.23   44.00
   1   2   6  689.13   44.00
   1   2   6  655.33   44.10
   1   2   6  711.33   44.00
  -2  -2  -6   65.19    5.70
  -2  -2  -6   60.79    5.00
   2  -2   6   63.39    6.20
  -2  -2  -6   64.19    5.00
  -2  -2  -6   56.29    5.50
  -2  -2  -6   60.29    5.40
   2   2   6   64.59    5.80
   2   2   6   55.39    5.50
   2   2   6   69.89    5.60
   2   2   6   49.50    5.30
   2   2   6   69.49    5.00
   2   2   6   56.19    5.30
  -3  -2  -6  717.13   44.40
  -3  -2  -6  693.63   44.10
  -3  -2  -6  682.73   44.50
   3  -2   6  752.72   44.50
  -3  -2  -6  685.43   44.50
   3  -2   6  656.83   44.70
  -3  -2  -6  726.23   44.40
  -3  -2  -6  686.83   44.50
   3   2   6  711.13   44.60
   3   2   6  678.73   44.40
   3   2   6  692.73   44.30
  -3   2  -6  633.24   44.50
   3   2   6  690.93   44.30
   3   2   6  687.33   44.30
  -4  -2  -6 1202.08   73.99
  -4  -2  -6 1190.38   73.99
  -4  -2  -6 1122.69   73.89
   4  -2   6 1048.90   74.19
   4  -2   6 1192.78   73.89
  -4  -2  -6 1133.19   73.89
  -4   2  -6 1138.99   74.09
   4   2   6 1166.28   73.99
   4   2   6 1203.48   73.79
   4   2   6 1168.28   73.99
   4   2   6 1165.48   73.79
   4   2   6 1185.08   74.09
   4   2   6 1160.68   73.79
   5  -2   6  991.10   59.59
  -5  -2  -6  920.01   59.49
  -5  -2  -6  977.60   59.59
  -5  -2  -6  936.81   59.39
   5  -2   6  949.60   59.29
   5  -2   6  859.41   59.99
  -5  -2  -6  887.21   59.39
   5   2   6  946.71   59.49
  -5   2  -6  865.91   59.59
   5   2   6  955.20   59.79
   5   2   6  967.80   59.39
   5   2   6  957.80   59.49
  -5   2  -6  798.32   59.99
   5   2   6  948.31   59.29
   5   2   6  973.60   59.39
  -6  -2  -6   63.19    6.30
  -6  -2  -6   66.69    6.40
  -6  -2  -6   62.59    6.30
  -6  -2  -6   53.69    6.70
   6  -2   6   85.19    7.90
   6  -2   6   67.49    6.10
   6   2   6   62.79    6.30
   6   2   6   59.69    6.50
  -6   2  -6   85.89    9.70
  -6   2  -6   77.59    7.60
   6   2   6   78.09    6.40
   6   2   6   73.29    5.90
   6   2   6   67.69    6.40
   7  -2   6   80.79    8.40
   7  -2   6   52.79    7.40
  -7  -2  -6   76.39    7.10
  -7  -2  -6   65.89    7.00
  -7  -2  -6   69.89    6.70
   7   2   6   79.09    7.20
  -7   2  -6   79.19    8.70
  -7   2  -6   60.29    6.30
   7   2   6   73.49    7.50
   7   2   6   79.49    8.20
  -7   2  -6   65.89    6.30
   7   2   6   82.59    6.30
   7   2   6   75.19    7.40
  -7   2  -6   83.09   11.10
   7   2   6   73.09    6.80
   8  -2   6  202.98   15.20
  -8  -2  -6  194.38   14.10
   8  -2   6  166.38   14.90
  -8  -2  -6  199.88   14.20
  -8  -2  -6  196.18   13.80
   8  -2   6  167.68   14.60
  -8   2  -6  176.88   13.50
  -8   2  -6  191.38   15.40
   8   2   6  197.28   14.40
   8   2   6  204.28   15.20
   8   2   6  209.58   13.50
  -8   2  -6  184.28   13.50
   8   2   6  192.58   13.90
  -9  -2  -6  615.24   39.40
  -9  -2  -6  649.24   39.70
   9  -2   6  533.75   40.20
   9  -2   6  601.34   40.20
  -9  -2  -6  611.44   39.20
  -9   2  -6  583.74   40.30
   9   2   6  583.84   39.80
   9   2   6  648.64   39.00
  -9   2  -6  563.54   39.00
   9   2   6  604.54   39.30
   9   2   6  649.34   40.30
  -9   2  -6  549.15   39.00
  10  -2   6   10.10    7.70
 -10  -2  -6   16.70    5.10
 -10  -2  -6   12.70    5.00
 -10  -2  -6   17.60    4.80
  10  -2   6   34.50    7.60
  10  -2   6   21.60    6.30
 -10   2  -6   16.10    6.90
  10   2   6   16.80    4.60
 -10   2  -6   21.60    4.70
 -10   2  -6   14.50    4.20
  10   2   6   11.00    5.80
  10   2   6   20.50    4.30
 -11  -2  -6   13.50    5.60
  11  -2   6   11.40    6.30
 -11  -2  -6   16.20    4.60
 -11  -2  -6   14.80    5.10
  11   2   6    4.70    6.20
 -11   2  -6   10.20    4.60
  11   2   6   10.20    4.60
  11   2   6   11.00    4.80
  12  -2   6   10.10    7.20
 -12  -2  -6   10.90    5.90
 -12  -2  -6   14.00    6.00
 -12  -2  -6   10.40    5.50
  12   2   6    9.60    7.30
 -12   2  -6   17.70    5.60
 -12   2  -6    9.30    8.30
  12   2   6   24.10    8.00
  13  -2   6   35.10   10.10
 -13  -2  -6   40.50    7.50
  13  -2   6   38.50    7.40
 -13  -2  -6   47.60    8.10
 -13  -2  -6   45.10    7.10
 -13   2  -6   28.10    7.20
 -13   2  -6   42.80   11.00
  13   2   6   31.90    8.90
  13   2   6   38.60    7.80
  13   2   6   41.50    6.80
 -14  -2  -6    0.90    8.20
 -14  -2  -6   15.30    6.50
  14  -2   6    1.90    6.80
 -14  -2  -6   -0.10    8.00
  14  -2   6   -1.70    9.80
  14   2   6    8.80    6.70
  14   2   6   -0.40    7.50
  14   2   6    7.80    7.30
  14   2   6    0.70    8.80
  15   3  -6   88.39   16.80
 -14  -3   6    3.80    8.50
 -14  -3   6    7.50    5.30
 -14  -3   6    6.20    6.20
  14  -3  -6    5.40   13.20
  14   3  -6   25.70    7.80
  14   3  -6    3.20    5.70
 -14   3   6   25.00   10.40
  13  -3  -6   -3.10   13.60
 -13  -3   6  -10.00    7.30
 -13  -3   6    1.50    4.70
 -13  -3   6    0.90    5.40
  13   3  -6   -1.80    4.90
  13   3  -6    8.70    6.60
 -12  -3   6   51.29    8.70
 -12  -3   6   58.79    8.40
  12  -3  -6   42.90   14.40
 -12  -3   6   58.19    8.30
  12   3  -6   56.99    7.30
 -12   3   6   60.49   10.20
 -12   3   6   68.89   17.80
  12   3  -6   67.19   10.60
 -11  -3   6   45.70    7.80
 -11  -3   6   46.80    7.50
 -11  -3   6   53.89    7.40
  11  -3  -6   41.40   12.10
  11  -3  -6   33.50   11.70
  11   3  -6   45.10    7.20
 -11   3   6   43.80    8.80
 -11   3   6   57.09   15.10
 -11   3   6   51.59    9.50
 -10  -3   6  651.23   39.80
  10  -3  -6  554.84   44.00
 -10  -3   6  667.03   39.70
  10  -3  -6  526.05   41.90
 -10   3   6  569.34   41.30
 -10   3   6  598.04   43.90
  10   3  -6  596.94   39.50
  10   3  -6  642.74   40.20
  -9  -3   6    2.40    5.40
   9  -3  -6  -11.30    7.00
  -9  -3   6   -6.90    3.60
  -9  -3   6   -6.40    3.80
   9  -3  -6    0.20    9.30
   9  -3  -6   -4.10    7.70
  -9   3   6    9.10    7.10
  -9   3   6    0.90    9.10
  -9   3   6  -10.80    6.60
   9   3  -6    1.30    3.40
   9   3  -6   -0.10    4.40
   8  -3  -6   -7.70    5.80
  -8  -3   6    2.80    3.20
  -8  -3   6    1.70    4.50
   8  -3  -6    2.70    8.00
   8  -3  -6   -3.70    6.10
  -8  -3   6   -0.30    3.50
  -8  -3   6    0.40    3.00
  -8   3   6   -6.80    5.90
   8   3  -6    0.10    3.80
  -8   3   6   -8.60    5.90
   8   3  -6    3.00    2.90
  -8   3   6   -2.20    7.50
   7  -3  -6   19.90    7.60
  -7  -3   6    4.40    2.80
   7  -3  -6    5.40    4.80
  -7  -3   6   -0.30    2.80
   7  -3  -6    6.50    5.40
  -7  -3   6   -5.30    4.60
  -7  -3   6    8.20    3.10
  -7   3   6   -0.10    5.40
   7   3  -6   -0.60    3.00
   7   3  -6    4.50    2.60
  -7   3   6   -0.60    6.50
  -7   3   6   11.80    5.50
  -6  -3   6   36.20    5.10
   6  -3  -6   44.20    7.90
   6  -3  -6   35.90    5.90
   6  -3  -6   28.50    6.00
  -6  -3   6   40.00    4.70
  -6  -3   6   40.50    6.10
   6   3  -6   36.80    5.50
   6   3  -6   36.10    5.00
  -6   3   6   47.00    8.70
  -6   3   6   42.90    6.40
   6   3  -6   31.30    4.70
  -6   3   6   52.39    9.40
  -6   3   6   43.20    6.40
  -5  -3   6   89.09    9.20
   5  -3  -6   85.59   11.50
   5  -3  -6   87.89   10.70
   5  -3  -6   96.59    9.20
   5  -3  -6   87.99    9.10
  -5  -3   6   88.49    7.10
  -5   3   6   92.89    9.80
  -5   3   6   70.49   10.20
  -5   3   6   83.99    9.40
   5   3  -6   94.69    8.30
   5   3  -6   82.99    7.00
   5   3  -6   83.39    7.60
  -5   3   6  103.49   11.30
   4  -3  -6    6.10    5.30
   3  -3  -6   45.40    6.60
   3  -3  -6   32.30    4.30
   3  -3  -6   31.30    5.20
   3  -3  -6   33.30    4.70
   3  -3  -6   32.40    6.50
  -3   3   6   49.10    8.00
  -3   3   6   51.59    6.90
   3   3  -6   26.50    4.30
  -3   3   6   43.80    5.60
  -2  -3   6  257.97   17.00
   2  -3  -6  258.97   18.90
   2  -3  -6  252.57   17.50
  -2  -3   6  265.97   18.20
   2  -3  -6  248.08   17.60
   2  -3  -6  275.67   17.80
   2   3  -6  272.37   17.30
  -2   3   6  264.67   19.30
  -2   3   6  208.38   20.20
  -2   3   6  275.47   18.00
  -1  -3   6  504.45   31.60
   1  -3  -6  490.95   31.10
   1  -3  -6  459.95   31.00
   1  -3  -6  485.05   30.90
  -1  -3   6  469.85   30.60
   1   3  -6  489.85   30.90
  -1   3   6  475.95   31.20
  -1   3   6  454.55   30.80
  -1   3   6  457.25   32.30
   0  -3   6   32.10    3.30
   0  -3  -6   19.30    3.60
   0   3  -6   28.80    4.10
  -1  -3  -6 2585.04  167.98
  -1  -3  -6 2772.42  167.78
  -1  -3  -6 2636.24  167.78
  -1  -3  -6 2583.44  167.68
   1  -3   6 2523.35  167.68
   1  -3   6 2674.83  167.98
   1   3   6 2806.82  167.88
   1   3   6 2655.33  167.88
   1   3   6 2614.14  167.68
   1   3   6 2593.64  167.78
   1   3   6 2700.13  168.68
   1   3   6 2625.74  167.88
   1   3   6 2655.73  167.88
  -2  -3  -6  204.08   13.60
  -2  -3  -6  201.68   13.90
  -2  -3  -6  195.98   13.60
  -2  -3  -6  206.38   13.40
   2   3   6  193.48   13.50
   2   3   6  183.98   13.40
   2   3   6  214.48   14.20
   2   3   6  187.38   13.90
   2   3   6  175.68   13.80
   2   3   6  217.38   13.60
   3  -3   6  105.29    8.90
  -3  -3  -6   97.59    8.20
   3  -3   6  108.19   11.10
  -3  -3  -6  107.39    8.00
  -3  -3  -6   97.89    7.30
  -3  -3  -6  114.89    8.40
  -3  -3  -6  109.09    8.20
   3  -3   6  119.39    7.90
   3   3   6   90.49    8.20
   3   3   6  103.09    8.70
   3   3   6   83.79    7.80
   3   3   6   83.09    7.60
   3   3   6   94.39    8.10
   3   3   6  112.29    7.90
   4  -3   6  457.85   31.60
   4  -3   6  467.05   29.80
  -4  -3  -6  421.36   29.90
  -4  -3  -6  464.35   30.00
  -4  -3  -6  452.05   29.50
  -4  -3  -6  470.75   29.90
   4  -3   6  429.46   30.80
  -4  -3  -6  470.75   30.00
   4   3   6  443.86   30.30
   4   3   6  469.95   29.80
   4   3   6  461.15   29.70
  -4   3  -6  497.25   30.50
   4   3   6  453.95   29.90
   4   3   6  453.95   30.30
   4   3   6  451.45   29.70
  -5  -3  -6  291.07   20.60
   5  -3   6  251.87   22.70
  -5  -3  -6  338.87   20.70
  -5  -3  -6  319.77   20.70
   5  -3   6  334.57   21.60
  -5  -3  -6  330.07   20.70
   5  -3   6  271.37   23.40
  -5   3  -6  258.37   21.80
  -5   3  -6  315.37   21.40
   5   3   6  329.97   20.40
   5   3   6  317.67   20.50
   5   3   6  278.67   21.10
   5   3   6  315.97   20.60
   5   3   6  325.77   20.70
   5   3   6  299.57   20.40
  -6  -3  -6  174.68   13.50
  -6  -3  -6  178.48   13.40
   6  -3   6  178.48   13.40
   6  -3   6  217.18   15.10
  -6  -3  -6  197.78   13.60
   6   3   6  179.18   13.50
  -6   3  -6  223.58   15.00
   6   3   6  188.58   13.40
  -6   3  -6  157.58   15.50
   6   3   6  190.08   13.30
   6   3   6  171.78   13.30
   7  -3   6   50.19    9.30
  -7  -3  -6   38.90    6.30
  -7  -3  -6   48.70    5.30
  -7  -3  -6   34.50    4.90
   7   3   6   37.80    4.90
  -7   3  -6   29.00    7.70
   7   3   6   39.50    5.10
  -7   3  -6   47.30    7.30
   7   3   6   33.40    5.70
   8  -3   6  501.75   33.20
  -8  -3  -6  469.55   31.80
  -8  -3  -6  481.55   31.70
  -8  -3  -6  515.15   32.10
   8   3   6  469.35   31.60
   8   3   6  496.25   31.80
  -8   3  -6  470.55   33.10
   8   3   6  462.75   31.60
  -8   3  -6  442.06   31.30
  -9  -3  -6    6.00    4.10
  -9  -3  -6   -0.60    4.20
   9  -3   6    5.50    6.10
   9  -3   6    0.00    6.50
  -9  -3  -6   -4.80    3.70
  -9   3  -6   -1.00    3.20
   9   3   6   -4.00    3.90
   9   3   6    3.30    4.10
   9   3   6   -5.20    3.80
  -9   3  -6    4.90    3.60
 -10  -3  -6    9.30    4.30
 -10  -3  -6   -2.40    4.80
 -10  -3  -6   13.10    4.60
  10   3   6    7.00    4.50
  10   3   6   -0.60    4.60
 -10   3  -6   14.10    4.10
 -10   3  -6    1.80    6.60
  10   3   6    7.60    4.60
 -11  -3  -6    9.10    5.60
 -11  -3  -6    8.70    5.10
 -11  -3  -6    8.10    5.50
  11  -3   6   -1.00    8.80
  11   3   6   12.70    5.40
  11   3   6    9.70    5.40
 -11   3  -6   12.60    7.90
 -11   3  -6    5.40    5.10
  12  -3   6   11.50    5.40
  12  -3   6   -4.90    9.60
 -12  -3  -6    2.50    5.30
 -12  -3  -6    5.40    5.90
 -12  -3  -6    0.40    6.10
  12   3   6    6.40    5.90
 -12   3  -6   -9.70   10.30
  12   3   6    5.90    5.90
  12   3   6   -1.50    5.90
 -13  -3  -6   10.20    6.40
  13  -3   6   -8.10   10.30
 -13  -3  -6   12.00    7.60
 -13  -3  -6   11.00    8.60
  13  -3   6    8.70    5.80
  13  -3   6   12.30    6.70
  13   3   6   24.50    7.20
  13   3   6   20.10    7.50
  13   3   6   10.20    6.90
  14  -4  -6   -8.10   18.00
 -14  -4   6   -1.50    5.50
 -14  -4   6  -17.10    8.50
  14   4  -6    8.50    6.50
  14   4  -6    3.50    8.20
 -13  -4   6    6.40    5.30
  13  -4  -6  -27.10   15.50
 -13  -4   6    6.00    4.90
 -13  -4   6   -2.50    8.00
  13   4  -6   -1.60    5.30
 -13   4   6   13.10   19.20
  13   4  -6    5.30    7.30
 -13   4   6   18.70   12.80
 -12  -4   6   24.20    5.30
 -12  -4   6   12.40    4.40
 -12  -4   6   14.10    7.90
  12  -4  -6    9.00   14.70
  12   4  -6   19.80    6.80
  12   4  -6   13.10    5.20
 -12   4   6   31.40   10.40
  11  -4  -6   24.10   14.10
 -11  -4   6   26.00    5.10
 -11  -4   6   37.50    8.10
 -11  -4   6   30.80    5.10
 -11   4   6   20.70   15.70
 -11   4   6   23.00    9.70
  11   4  -6   36.30    5.90
  10  -4  -6  249.78   27.80
 -10  -4   6  278.27   18.90
 -10  -4   6  276.77   19.00
 -10  -4   6  303.27   21.40
 -10   4   6  264.37   23.00
 -10   4   6  253.17   27.20
  10   4  -6  263.07   19.40
  -9  -4   6    9.20    5.50
   9  -4  -6   24.40    8.90
   9  -4  -6   12.40    7.70
   9  -4  -6   -1.60   10.80
  -9  -4   6    2.60    3.30
  -9  -4   6    5.60    3.30
  -9   4   6   21.30   10.30
  -9   4   6    4.10    7.40
  -9   4   6    3.70    7.60
   9   4  -6    5.20    4.00
  -8  -4   6   16.90    6.00
   8  -4  -6   17.20    7.80
   8  -4  -6   -4.90    7.90
  -8   4   6   29.40   10.00
  -8   4   6   11.20    7.50
   8   4  -6   10.30    3.80
  -8   4   6   16.40    7.20
   7  -4  -6    8.70    6.70
  -7  -4   6   10.50    3.00
  -7  -4   6   12.10    5.40
  -7  -4   6    9.30    2.90
   7  -4  -6   11.70    9.40
   7  -4  -6   14.10    6.30
  -7  -4   6   15.90    3.10
  -7   4   6   12.50    6.60
  -7   4   6   14.70    9.10
  -7   4   6   10.50    6.70
   7   4  -6   13.00    3.80
  -7   4   6    7.70    9.40
   6  -4  -6   28.00    6.50
  -6  -4   6   30.50    6.10
   6  -4  -6   36.80    9.50
   6  -4  -6   27.00    5.20
  -6  -4   6   29.60    4.50
  -6   4   6   28.00    9.40
  -6   4   6   30.20    6.90
  -6   4   6   36.10    7.00
  -6   4   6   32.50    8.90
   6   4  -6   41.90    5.10
   5  -4  -6   74.59   11.80
  -5  -4   6   72.79    9.40
   5  -4  -6   59.79    8.10
   5  -4  -6   75.19   10.20
   5  -4  -6   56.29    8.60
  -5   4   6   79.49   11.00
   5   4  -6   57.79    6.70
  -5   4   6   75.09    9.70
   4  -4  -6   88.49   12.00
   4  -4  -6   94.29    9.50
   4  -4  -6   96.99    8.80
  -4  -4   6  102.99   10.10
   4  -4  -6   98.39   12.70
   4  -4  -6   99.99    8.40
  -4   4   6   84.69   12.40
   4   4  -6  101.69    8.20
  -4   4   6  111.29   10.60
   3  -4  -6   28.80    7.60
   3  -4  -6   14.40    4.70
  -3  -4   6   16.20    4.90
   3  -4  -6   27.60    7.10
   3  -4  -6   19.10    4.40
  -3  -4   6   11.80    2.80
   3  -4  -6   17.10    3.40
  -3   4   6   32.40    6.70
  -3   4   6   33.10    7.80
   3   4  -6   12.10    3.20
  -2  -4   6   13.50    2.50
  -2  -4   6   12.70    4.60
   2  -4  -6    5.40    6.30
   2  -4  -6   11.90    3.70
  -2   4   6   15.80    7.10
  -2   4   6    8.90    3.00
   2   4  -6   14.70    3.30
  -1  -4   6  108.29    8.30
  -1  -4   6  108.19   11.00
   1  -4  -6  108.59    9.70
  -1   4   6  130.09   12.90
   1   4  -6  128.39    9.20
  -1   4   6  105.09    8.50
  -1   4   6  137.89   12.70
   0  -4  -6  877.01   53.29
   0  -4  -6  815.52   53.09
   0  -4   6  774.52   52.99
   0  -4  -6  777.02   53.39
   0  -4   6  867.31   54.09
   0   4   6  840.52   53.39
   0   4   6  761.52   52.99
   0   4   6  841.02   54.99
   0   4   6  842.92   53.29
   0   4  -6  883.21   53.39
   0   4   6  846.42   53.49
  -1  -4  -6   65.29    6.30
  -1  -4  -6   49.10    5.80
  -1  -4  -6   57.29    6.00
   1   4   6   45.90    5.50
   1   4   6   66.49    7.10
   1   4   6   74.79   10.30
   1   4   6   66.69    7.70
   1   4   6   43.10    6.00
   1   4   6   59.69    7.20
   1   4   6   69.19    6.40
  -2  -4  -6   29.00    4.80
  -2  -4  -6   37.40    4.70
  -2  -4  -6   28.60    4.50
  -2  -4  -6   28.10    4.70
   2   4   6   36.60    6.40
   2   4   6   34.30    4.50
   2   4   6   36.50    4.90
   2   4   6   28.90    3.70
   2   4   6   30.80    4.50
   2   4   6   31.90    4.40
   2   4   6   26.20    7.00
   3  -4   6   18.80    8.90
   3  -4   6   15.00    6.80
  -3  -4  -6   22.70    3.10
  -3  -4  -6   14.50    3.90
  -3  -4  -6   16.20    3.30
   3  -4   6   15.60    3.80
   3   4   6   14.20    7.20
   3   4   6   16.20    3.20
   3   4   6   13.30    4.20
   3   4   6   13.50    3.20
   3   4   6   19.20    4.00
   3   4   6   19.40    3.80
  -3   4  -6   26.60    4.80
   3   4   6   21.10    3.70
  -4  -4  -6  176.48   12.60
   4  -4   6  156.18   12.40
   4  -4   6  180.28   20.00
  -4  -4  -6  156.98   11.70
  -4  -4  -6  185.48   12.40
   4   4   6  158.28   12.50
   4   4   6  168.18   12.40
   4   4   6  181.18   12.50
  -4   4  -6  164.28   13.60
   4   4   6  150.18   13.80
  -5  -4  -6    5.30    3.30
  -5  -4  -6    0.30    2.80
  -5  -4  -6   -1.50    3.60
  -5  -4  -6   -0.60    3.60
   5  -4   6    1.50    3.70
   5  -4   6    5.00    6.30
   5   4   6   -2.80    3.40
   5   4   6   -4.20    4.10
  -5   4  -6    5.40    5.00
   5   4   6    8.30    3.50
  -6  -4  -6    1.40    3.90
   6  -4   6    3.60    4.70
  -6  -4  -6    3.50    3.70
   6  -4   6   20.50    7.40
  -6  -4  -6    3.50    4.10
   6   4   6    4.40    3.80
   6   4   6    0.00    3.80
   6   4   6    2.40    3.70
  -6   4  -6   16.60    7.40
  -7  -4  -6   28.20    5.30
   7  -4   6   34.90    9.20
   7  -4   6   16.70    6.00
  -7  -4  -6   28.70    5.70
  -7  -4  -6   33.60    5.20
   7   4   6   28.90    5.10
   7   4   6   33.80    5.30
  -7   4  -6   34.40    8.00
   7   4   6   31.20    5.30
  -8  -4  -6   -3.80    4.10
  -8  -4  -6   -3.80    4.40
   8  -4   6   16.80    8.40
  -8  -4  -6    5.70    4.20
  -8   4  -6   -2.90    6.10
   8   4   6    6.10    3.80
   8   4   6   -0.90    4.00
   8   4   6   -2.40    4.10
  -9  -4  -6    4.60    4.40
  -9  -4  -6   10.00    4.60
  -9  -4  -6   -3.90    5.10
  -9   4  -6    7.60    3.80
   9   4   6    4.50    4.60
   9   4   6    6.20    4.40
  -9   4  -6    2.60    7.30
   9   4   6    1.40    4.50
 -10  -4  -6   -2.70    4.90
  10  -4   6   11.00    4.30
  10  -4   6    2.70    8.60
 -10  -4  -6   -2.60    5.40
 -10  -4  -6    7.10    5.20
  10   4   6    4.80    5.10
  10   4   6    4.50    5.00
  10   4   6    3.10    5.10
 -10   4  -6   -1.60    7.60
  11  -4   6   17.70    5.10
 -11  -4  -6   23.10    6.50
 -11  -4  -6   19.50    6.10
 -11  -4  -6   16.90    6.30
  11  -4   6    4.40   12.10
  11   4   6   21.10    6.40
  11   4   6   25.50    6.40
 -11   4  -6   25.00    9.40
  11   4   6   28.20    6.50
 -12  -4  -6   11.30    7.00
 -12  -4  -6    3.10    6.30
  12  -4   6   -2.60   10.60
  12  -4   6    6.40    5.40
 -12  -4  -6   -5.30    6.30
  12   4   6    6.50    6.60
  12   4   6   -4.20    6.50
  13  -4   6   32.10    8.20
 -13  -4  -6   22.20    8.50
 -13  -4  -6   30.30    8.50
 -13  -4  -6   39.50    9.00
  13   4   6   31.40    8.50
  13   4   6   39.10    8.50
  13  -5  -6  -24.00   21.50
 -13  -5   6    6.50    5.20
 -13  -5   6   10.90    5.10
 -13  -5   6    0.80    8.50
  13   5  -6   -4.10    6.00
 -12  -5   6   39.50    5.90
  12  -5  -6   24.30   17.90
 -12  -5   6   32.40    5.50
 -12  -5   6   32.10    8.10
  12   5  -6   38.10    6.70
  11  -5  -6    9.10   16.30
 -11  -5   6   15.90    4.50
 -11  -5   6   24.80    7.40
 -11  -5   6   20.00    4.70
 -11   5   6   -7.00   14.80
  11   5  -6   17.80    5.60
 -10  -5   6  128.89   10.20
 -10  -5   6  137.99   14.40
  10  -5  -6   77.09   18.40
 -10  -5   6  128.19   10.30
 -10   5   6   90.29   20.00
  10   5  -6  125.69   11.40
 -10   5   6  105.79   17.70
  -9  -5   6   27.60    7.10
  -9  -5   6   22.40    4.30
  -9  -5   6   22.40    4.10
   9  -5  -6   12.70   14.00
  -9   5   6   43.60    9.80
   9   5  -6   19.20    5.70
  -9   5   6    7.60   13.10
  -8  -5   6   41.10    7.80
   8  -5  -6   40.40   13.20
  -8   5   6   27.40   13.10
  -8   5   6   28.10    8.50
  -7  -5   6  113.79   12.60
  -6  -5   6   74.19   11.00
   6  -5  -6   73.89   14.50
  -6   5   6  106.39   17.30
   6   5  -6   75.89    8.50
  -6   5   6   65.79   13.10
   5  -5  -6  301.07   28.50
  -5  -5   6  362.16   24.10
   5   5  -6  346.57   22.80
  -5   5   6  292.97   26.20
   4  -5  -6   -2.10    9.10
  -4   5   6   22.20    9.90
  -3   5   6  283.77   23.80
  -2  -5   6   58.69   10.40
   2   5  -6   80.59    8.30
  -2   5   6   90.59   13.40
  -1  -5   6   16.00    3.40
  -1  -5   6   25.30    6.00
  -1   5   6   31.80    9.40
   0  -5   6   14.00    3.50
   0  -5   6   22.90    5.90
   0   5  -6   15.10    4.50
  -1  -5  -6  255.77   18.90
  -1  -5  -6  295.07   19.10
   1  -5   6  262.37   19.10
   1   5   6  270.37   20.00
   1   5   6  268.07   19.80
   1   5   6  308.97   22.70
   1   5   6  284.17   19.60
  -1   5  -6  307.17   19.90
   2  -5   6    8.50    4.20
  -2  -5  -6   18.10    3.50
   2   5   6   11.90    4.80
   2   5   6   14.80    5.00
   2   5   6   24.80    8.70
   2   5   6   19.50    4.70
   2   5   6   13.30    4.80
  -3  -5  -6  209.18   15.20
  -3  -5  -6  207.08   14.70
   3   5   6  198.68   18.50
   3   5   6  189.08   15.20
   3   5   6  198.78   14.80
   3   5   6  191.38   15.10
  -3   5  -6  218.48   16.40
  -4  -5  -6  177.78   13.80
  -4  -5  -6  196.88   14.30
   4   5   6  198.18   14.00
   4   5   6  170.28   14.10
   4   5   6  194.18   17.60
   4   5   6  163.68   13.90
  -4   5  -6  185.78   15.40
  -5  -5  -6  130.49   12.20
  -5  -5  -6  162.98   12.60
   5   5   6  160.08   16.60
   5   5   6  145.59   12.20
   5   5   6  156.08   12.50
   5   5   6  143.39   12.30
  -6  -5  -6   43.00    6.80
  -6  -5  -6   29.00    6.20
  -6  -5  -6   30.30    5.70
   6   5   6   26.80    5.80
   6   5   6   32.80    5.50
  -6   5  -6   34.90    7.90
   6   5   6   25.70   11.30
   6   5   6   23.00    5.50
  -7  -5  -6   75.49    9.40
  -7  -5  -6   87.59    9.30
  -7  -5  -6   76.39   10.20
   7  -5   6   86.29   13.40
   7   5   6   76.59    8.90
   7   5   6   71.29    9.30
  -7   5  -6   83.89   12.40
   7   5   6   72.09    9.40
  -8  -5  -6    6.50    5.30
  -8  -5  -6   10.10    5.40
  -8  -5  -6    2.00    5.10
   8   5   6    2.90    5.30
   8   5   6   12.50    5.10
  -8   5  -6   23.80    8.40
   8   5   6    7.80    4.80
  -9  -5  -6   33.40    6.50
  -9  -5  -6   36.30    6.60
  -9  -5  -6   15.80    6.10
   9  -5   6   21.50   11.30
   9   5   6   23.90    6.40
   9   5   6   24.00    6.60
  10  -5   6   15.20   12.60
 -10  -5  -6   34.80    7.10
 -10  -5  -6   27.80    6.80
 -10  -5  -6   30.90    6.80
  10   5   6   25.30    6.60
  10   5   6   39.70    7.60
 -11  -5  -6   17.20    7.00
  11  -5   6   20.50   17.10
 -11  -5  -6   11.90    7.00
 -11  -5  -6   12.90    7.20
  11   5   6   30.80    7.80
  11   5   6   17.70    7.60
 -12  -5  -6   20.70    8.00
 -12  -5  -6   34.80   10.20
  12  -5   6   10.90   16.30
  12   5   6   35.90    8.70
  12   5   6   22.90    8.60
 -11  -6   6   14.40    7.20
  11  -6  -6  -22.80   19.30
 -11  -6   6   21.70    4.60
  11   6  -6   18.80    6.80
 -10  -6   6    0.10    3.80
 -10  -6   6    2.30    7.30
  10  -6  -6    5.70   17.70
  10   6  -6    3.30    5.90
  -9  -6   6   44.20    8.00
   9  -6  -6   29.60   17.20
   9   6  -6   34.30    6.90
   8  -6  -6   21.80   15.90
  -8  -6   6   35.90    8.10
   8   6  -6   31.90    6.60
  -8   6   6   40.50   15.70
  -7  -6   6  139.99   14.40
   7  -6  -6   98.49   19.50
  -7   6   6  103.69   20.70
   7   6  -6  139.29   12.40
   6  -6  -6   64.49   16.00
  -6  -6   6   95.09   12.90
   6   6  -6   88.99   10.10
  -6   6   6   74.59   16.00
  -5  -6   6  265.47   20.20
   5  -6  -6  221.48   28.70
  -5   6   6  231.98   24.50
   5   6  -6  261.77   18.80
   4  -6  -6  115.99   16.60
  -4  -6   6  137.59   14.40
  -4   6   6  122.39   18.50
   4   6  -6  123.99   12.30
   3  -6  -6  336.37   34.10
  -3  -6   6  425.86   27.20
  -3   6   6  297.47   29.10
   3   6  -6  371.16   25.70
  -2  -6   6   15.70    7.00
   2   6  -6   11.20    5.20
  -1  -6   6  103.59   13.00
   1   6  -6   80.29   10.20
   0  -6   6  310.77   25.30
   0   6  -6  387.06   24.90
  -1  -6  -6    2.50    3.60
   1   6   6   13.30    5.50
  -1   6  -6    7.50    6.10
  -2  -6  -6   25.70    4.70
   2   6   6   28.90    6.40
   2   6   6   31.70    6.60
  -3  -6  -6    6.00    3.80
   3   6   6    0.70   10.30
   3   6   6    2.60    5.50
  -4  -6  -6   15.00    5.70
  -4  -6  -6   13.80    5.20
   4   6   6   12.70   11.10
   4   6   6   14.90    6.50
  -4   6  -6   12.60    7.50
   4   6   6    8.70    5.30
   4   6   6   -0.40    8.00
  -5  -6  -6   25.90    5.70
   5  -6   6   27.30   13.00
  -5  -6  -6   29.40    6.30
   5   6   6   45.30   12.40
   5   6   6   38.50    6.60
   5   6   6   27.20    6.30
  -6  -6  -6   69.39    9.40
  -6  -6  -6   66.19   10.60
   6  -6   6   89.59   16.30
   6   6   6   85.79   14.70
  -6   6  -6   89.99   14.80
   6   6   6   73.29    8.80
   6   6   6   65.29   10.00
  -7  -6  -6   14.90    6.60
  -7  -6  -6    6.30    5.60
   7   6   6    0.60    6.10
   7   6   6    7.40   12.30
   7   6   6    0.30    6.00
  -7   6  -6    9.00    9.00
  -8  -6  -6   -8.10    6.50
  -8  -6  -6   -3.50    5.80
  -8  -6  -6   -2.10    6.80
   8  -6   6   -9.20   17.50
   8   6   6   13.60   13.80
  -8   6  -6   -2.60   11.50
   8   6   6   14.70    6.40
   8   6   6    0.30    6.80
  -9  -6  -6   11.20    7.50
   9  -6   6  -22.70   17.00
  -9  -6  -6    2.70    6.80
  -9  -6  -6    5.40    6.30
   9   6   6   -8.40    7.00
   9   6   6    3.50    7.50
 -10  -6  -6  108.19   13.70
 -10  -6  -6  119.49   15.40
 -10  -6  -6  112.89   13.30
  10  -6   6  100.49   22.30
  10   6   6  127.39   14.00
  10   6   6  124.69   15.00
   9  -7  -6    4.00   21.40
  -9  -7   6    6.70    8.00
   9   7  -6    3.70    6.40
   8  -7  -6   60.59   21.60
  -8  -7   6   50.99    9.60
  -8   7   6   11.50   19.10
   8   7  -6   55.59    8.30
  -7  -7   6    9.60    7.30
   7  -7  -6   10.40   19.00
  -7   7   6   12.50   17.90
   7   7  -6    3.00    6.10
  -6  -7   6    5.00    8.20
   6  -7  -6    7.80   16.70
  -6   7   6   -3.00   16.60
   6   7  -6    1.50    5.80
  -5  -7   6  228.68   19.90
   5  -7  -6  173.38   31.80
  -5   7   6  161.18   25.60
   5   7  -6  195.78   16.90
  -4  -7   6   19.00    8.10
   4  -7  -6    0.20   15.80
  -4   7   6   17.70   15.20
   4   7  -6   -6.30    5.90
  -3  -7   6   12.00    8.30
   3  -7  -6    1.30   14.80
  -3   7   6   12.90   14.30
   3   7  -6    4.40    6.00
   2  -7  -6   49.70   17.00
   2   7  -6    1.50    6.00
  -2   7   6   17.10   13.70
  -1  -7   6   71.69   10.90
  -1   7   6   77.29   17.10
   1   7  -6   99.19   12.10
   0  -7   6   11.10    8.20
   0   7   6   10.70   13.40
   0   7  -6   19.90    7.40
  -1  -7  -6   -0.30    4.20
  -1   7  -6   13.70   13.10
   1   7   6   -2.70   13.30
  -2  -7  -6   -4.20    4.20
   2   7   6    0.90    7.10
   2   7   6   12.10   13.30
  -3  -7  -6   16.40    5.00
   3   7   6   15.60    7.50
   3   7   6   27.70   14.70
  -4  -7  -6   14.70    5.50
   4  -7   6   21.90   16.70
   4   7   6   17.00    7.60
  -4   7  -6   21.50   10.00
   4   7   6   48.10   15.80
  -5  -7  -6  120.09   12.40
   5   7   6  157.38   22.70
   5   7   6  123.39   13.60
  -6  -7  -6   21.20    6.30
   6   7   6   14.20    7.50
   6   7   6   26.40   15.30
  -6   7  -6   18.70   13.30
  -7  -7  -6    5.30    6.20
  -7  -7  -6   -7.10    7.20
   7   7   6    9.70   15.80
   7   7   6    2.70    7.20
  -7   7  -6   -1.70   10.30
  -8  -7  -6  -15.30    7.90
  -8  -7  -6    6.90    6.90
   8   7   6   -1.60   17.30
   8   7   6    3.20    7.80
  -7  -8   6    6.60    9.20
   7   8  -6    9.60    8.40
   6  -8  -6   -6.70   22.70
  -6  -8   6   12.70    9.20
  -6   8   6   -5.30   20.90
   6   8  -6    8.90    7.30
   5  -8  -6   49.90   20.80
  -5  -8   6   37.30   10.00
  -5   8   6   49.00   20.60
   5   8  -6   44.60    8.50
  -4  -8   6   10.70   10.10
   4  -8  -6   17.60   18.90
   4   8  -6    7.80    7.60
  -4   8   6   20.10   18.50
  -3  -8   6    3.70   10.40
   3  -8  -6   -6.50   19.30
   3   8  -6   -7.60   20.30
  -3   8   6   16.10   18.40
   3   8  -6   14.10    7.90
  -2  -8   6   62.79   12.70
   2  -8  -6   65.49   22.60
  -2   8   6   91.39   20.90
   2   8  -6   92.29   14.80
   2   8  -6   92.69   19.20
  -1  -8   6   35.50   11.00
   1  -8  -6   50.29   21.50
  -1   8   6   33.30   17.90
   1   8  -6   55.79   11.10
   1   8  -6   43.80   19.90
   0   8  -6   -4.20   10.50
   0   8   6    1.30   16.60
   0   8  -6  -11.90   19.50
   1   8   6   31.80   18.10
   2   8   6   44.40   17.60
   3   8   6   25.90    9.60
   3   8   6   19.20   17.50
  -4  -8  -6   -1.70    7.50
   4   8   6    5.10   17.90
   4   8   6   -0.60    9.30
  -5  -8  -6   -4.10    6.40
   5   8   6    3.90   19.00
   5   8   6   -3.00    9.20
 -15   0   7    6.40    8.50
  15   0  -7   -2.60    7.90
 -15   0   7   10.10    9.50
 -14   0   7  -13.70    7.30
  14   0  -7    3.50    7.70
 -14   0   7    2.50    8.30
 -13   0   7   17.90    7.50
  13   0  -7    6.00    7.00
 -13   0   7    3.90    6.70
  12   0  -7    0.30    5.80
 -12   0   7   -8.60    6.50
 -12   0   7   -6.70    5.90
  11   0  -7    7.80    9.80
 -11   0   7   -1.10    5.70
  11   0  -7    0.50    5.60
 -11   0   7    4.30    6.00
 -10   0   7   -6.40    5.50
 -10   0   7  -11.60    5.60
  10   0  -7   10.60    8.20
  10   0  -7   12.60    5.70
   9   0  -7    7.50    5.00
  -9   0   7   -6.90    5.30
  -9   0   7   -5.30    6.40
   9   0  -7   -1.80    6.60
   8   0  -7   -2.10    4.20
  -8   0   7   -3.50    4.30
   8   0  -7    7.20    5.40
  -8   0   7    3.10    5.10
  -8   0   7   -3.40    3.70
  -8   0   7   -0.20    4.20
  -7   0   7    0.20    4.20
  -7   0   7    0.00    3.90
  -7   0   7    0.10    4.10
   7   0  -7    3.70    4.00
   7   0  -7    0.40    3.90
   7   0  -7   -0.20    4.20
   6   0  -7    2.50    3.90
   6   0  -7    7.00    3.50
  -6   0   7   -1.30    3.80
  -6   0   7   -3.10    3.60
  -6   0   7   -0.30    3.70
   6   0  -7    3.50    3.70
  -5   0   7    2.00    3.50
   5   0  -7   -1.40    3.30
  -5   0   7    4.50    3.20
   5   0  -7    3.20    3.50
  -5   0   7   -2.50    3.00
  -5   0   7    1.80    3.50
   4   0  -7   -5.90    2.90
  -4   0   7   -6.30    3.20
   4   0  -7   -6.60    2.80
  -3   0   7   -4.60    2.90
   3   0  -7   -3.20    2.60
   3   0  -7    0.50    2.70
  -3   0   7   -2.00    2.80
  -2   0   7   -0.90    2.50
   2   0  -7    0.00    2.40
  -2   0   7   -0.70    2.40
   2   0  -7    1.40    2.40
  -1   0   7    0.40    2.20
   1   0  -7    0.80    2.10
  -1   0   7   -1.90    2.30
   1   0  -7   -2.30    2.30
   0   0   7   -0.20    2.00
   0   0   7    0.00    1.60
   0   0   7    3.90    2.20
   0   0   7    4.90    2.20
   0   0  -7    0.40    1.90
  -1   0  -7    4.30    1.80
   1   0   7    0.80    1.70
   1   0   7    1.10    1.80
   1   0   7    0.70    1.90
   1   0   7   -0.60    1.70
   1   0   7   -1.20    1.50
  -1   0  -7    0.40    1.80
   2   0   7    0.90    2.00
   2   0   7   -2.60    1.50
  -2   0  -7   -2.60    1.60
   2   0   7   -2.90    1.60
  -2   0  -7   -4.80    2.10
   2   0   7   -1.50    1.70
  -3   0  -7   -0.40    1.60
   3   0   7    0.20    1.70
   3   0   7   -0.50    1.60
  -3   0  -7   -3.20    2.00
  -3   0  -7   -1.40    1.80
  -3   0  -7    1.70    1.50
   3   0   7   -1.10    1.80
  -4   0  -7    0.90    1.90
  -4   0  -7    2.80    1.80
   4   0   7    0.90    1.70
   4   0   7   -0.60    1.80
   4   0   7   -1.60    1.90
   4   0   7   -2.10    2.40
  -4   0  -7    3.70    2.20
  -4   0  -7    3.80    2.30
   4   0   7    2.20    1.90
   4   0   7    2.50    2.00
   5   0   7   -1.90    2.80
   5   0   7   -1.40    2.10
  -5   0  -7    0.50    2.00
  -5   0  -7    0.40    2.40
   5   0   7    0.00    2.20
  -5   0  -7   -3.40    2.30
   5   0   7    2.80    2.20
  -5   0  -7    0.30    2.30
   5   0   7    0.50    2.00
   5   0   7   -0.50    2.10
   6   0   7    0.10    2.40
  -6   0  -7   -0.80    2.20
   6   0   7   -3.00    2.30
  -6   0  -7    1.70    2.50
   6   0   7   -2.80    2.40
  -6   0  -7    0.20    3.30
   6   0   7   -3.90    2.60
   6   0   7   -2.20    2.60
   6   0   7    1.50    3.30
  -6   0  -7    4.00    2.90
  -7   0  -7    5.60    3.10
   7   0   7   -1.80    2.70
   7   0   7   -4.10    4.10
  -7   0  -7    0.70    2.70
   7   0   7   -2.00    2.80
   7   0   7   -2.10    2.90
  -7   0  -7   -4.40    3.20
  -7   0  -7    0.10    2.50
   7   0   7    2.80    3.00
   7   0   7    0.40    3.30
   8   0   7    5.90    4.10
   8   0   7   -2.40    3.50
  -8   0  -7    1.40    3.10
   8   0   7    2.70    4.10
   8   0   7    1.50    3.30
  -8   0  -7    2.50    2.80
   8   0   7    1.30    3.20
   9   0   7   -7.90    4.10
   9   0   7    6.00    4.00
  -9   0  -7    3.00    3.30
   9   0   7    4.80    3.70
  -9   0  -7   -6.30    4.20
   9   0   7    7.30    5.00
  -9   0  -7   -2.80    3.50
   9   0   7   -2.00    5.20
  10   0   7    3.50    5.70
  10   0   7    1.30    4.40
 -10   0  -7   -5.00    4.80
  10   0   7    0.60    4.10
 -10   0  -7   -1.60    4.10
 -10   0  -7    0.90    3.80
  10   0   7  -12.50    6.40
  11   0   7   -5.90    4.80
  11   0   7   -0.60    4.40
 -11   0  -7   -3.60    4.10
  11   0   7    5.40    5.50
 -11   0  -7   -2.40    4.80
 -12   0  -7    5.80    5.80
  12   0   7   -1.50    5.40
 -12   0  -7   -0.10    5.70
 -12   0  -7   -8.70    4.50
  12   0   7   -7.10    5.40
  12   0   7    2.60    6.30
  13   0   7    4.40    7.00
  13   0   7   -6.40    5.90
  13   0   7   -0.80    6.30
 -13   0  -7   -8.60    7.90
 -13   0  -7    3.20    5.60
  14   0   7   -5.00    7.00
 -14   0  -7    4.70   11.50
  14   0   7   -8.70    6.10
  14   0   7    3.10    7.20
 -14   0  -7    7.10    7.10
  14   0   7   11.00    9.30
  15  -1  -7   11.90    9.80
 -15  -1   7   23.50    7.80
 -15  -1   7   17.30    8.80
  15   1  -7    0.20    8.10
 -15   1   7   31.70    9.50
 -14  -1   7   95.39   13.20
  14  -1  -7  119.89   16.70
 -14  -1   7  103.79   12.60
 -14  -1   7   79.79   11.00
 -14   1   7   91.79   12.30
  14   1  -7  113.39   14.70
 -14   1   7   91.29   12.80
 -13  -1   7    6.80    8.60
 -13  -1   7   10.00    6.50
  13  -1  -7    8.20    9.00
 -13   1   7    3.50    8.60
 -13   1   7   16.20    7.60
  13   1  -7   10.80    6.40
 -12  -1   7   11.10    6.00
 -12  -1   7    7.00    5.60
  12  -1  -7   27.60   13.30
  12  -1  -7   -2.00    8.10
 -12  -1   7   14.40    6.00
 -12   1   7    8.50    7.60
  12   1  -7   16.90    5.40
  11  -1  -7   43.60   11.70
 -11  -1   7   35.60    6.60
 -11  -1   7   31.30    6.60
 -11   1   7   42.80    7.90
 -11   1   7   37.80    7.80
  11   1  -7   40.60    6.10
  10  -1  -7   22.10    7.60
 -10  -1   7    7.00    5.40
 -10  -1   7   12.70    5.70
 -10  -1   7   21.90    5.60
  10  -1  -7   21.80    9.00
  10   1  -7   31.70    5.20
 -10   1   7   21.00    6.80
 -10   1   7   14.90    6.50
   9  -1  -7   -1.10    6.90
  -9  -1   7    1.50    4.70
   9  -1  -7   -5.10    6.70
  -9  -1   7    0.60    5.40
   9  -1  -7    6.00    6.00
  -9  -1   7   -1.10    4.70
  -9  -1   7   -8.00    4.50
   9   1  -7    5.40    3.80
   9   1  -7  -13.70    5.60
  -9   1   7   -4.00    5.70
  -9   1   7   -8.70    5.40
  -8  -1   7  134.89   11.40
  -8  -1   7  132.29   11.40
   8  -1  -7  134.79   13.20
  -8  -1   7  126.39   11.20
   8  -1  -7  100.79   12.30
  -8  -1   7  128.99   10.80
   8  -1  -7  130.39   12.60
  -8   1   7  119.39   11.30
   8   1  -7  143.89   10.30
   8   1  -7  136.69   11.50
  -8   1   7  124.89   11.90
   8   1  -7   95.09   11.00
  -8   1   7  104.89   13.80
   7  -1  -7  390.66   27.30
  -7  -1   7  395.36   26.90
   7  -1  -7  387.96   27.20
  -7  -1   7  401.56   27.10
   7  -1  -7  404.46   27.60
  -7  -1   7  392.46   26.70
  -7  -1   7  392.26   26.70
  -7   1   7  411.06   27.10
   7   1  -7  427.76   26.40
   7   1  -7  375.16   26.90
  -7   1   7  430.06   27.30
   7   1  -7  365.16   26.80
  -6  -1   7  917.71   56.69
   6  -1  -7  848.42   56.89
   6  -1  -7  943.81   57.19
  -6  -1   7  866.21   56.99
   6  -1  -7  880.71   56.89
  -6  -1   7  900.71   56.69
   6   1  -7  836.32   56.69
  -6   1   7  950.90   56.99
   6   1  -7  903.11   56.29
  -6   1   7  924.81   56.89
   6   1  -7  837.72   56.69
  -6   1   7  745.63   56.89
  -5  -1   7  842.52   56.59
   5  -1  -7  859.41   56.49
   5  -1  -7  993.70   57.09
   5  -1  -7  785.12   56.99
  -5  -1   7  884.81   56.29
  -5  -1   7  904.91   56.39
  -5   1   7  842.82   56.69
   5   1  -7  863.31   56.39
  -5   1   7  891.11   56.69
   5   1  -7  874.41   56.39
  -5   1   7  895.41   56.59
   4  -1  -7   64.29    6.50
  -4  -1   7   49.30    6.70
   4  -1  -7   52.29    6.60
  -4  -1   7   51.89    6.00
   4  -1  -7   59.79    7.80
  -4  -1   7   51.89    6.10
  -4   1   7   49.99    7.00
  -4   1   7   47.70    7.30
   4   1  -7   60.79    6.10
   4   1  -7   52.39    6.20
  -3  -1   7  102.19    8.40
   3  -1  -7   95.19    8.50
   3  -1  -7  120.99    9.30
   3  -1  -7  100.89    8.60
  -3  -1   7   94.49    8.40
  -3   1   7  107.99    9.10
   3   1  -7  114.19    8.40
  -3   1   7   94.49    8.50
   3   1  -7  105.09    8.20
   2  -1  -7   58.39    5.90
  -2  -1   7   66.89    6.20
   2  -1  -7   52.59    7.20
   2  -1  -7   54.29    5.70
  -2  -1   7   61.59    5.80
  -2   1   7   54.89    6.30
   2   1  -7   67.99    6.00
  -2   1   7   61.79    6.20
   2   1  -7   66.69    5.70
  -1  -1   7   83.99    6.50
   1  -1  -7   70.39    6.40
   1  -1  -7   68.99    6.30
  -1  -1   7   74.49    6.30
   1   1  -7   76.79    6.20
  -1   1   7   75.49    6.70
   1   1  -7   83.69    6.20
  -1   1   7   70.89    6.50
   0  -1   7 1299.57   80.39
   0  -1   7 1221.68   80.29
   0  -1  -7 1242.58   80.39
   0  -1  -7 1256.77   80.39
   0   1   7 1223.38   80.49
   0   1   7 1324.47   80.39
   0   1  -7 1319.27   80.29
   0   1  -7 1309.77   80.29
   0   1   7 1207.88   80.39
   0   1   7 1234.58   80.39
  -1  -1  -7 1301.77   80.09
   1  -1   7 1272.77   79.99
  -1  -1  -7 1318.07   80.19
   1  -1   7 1284.17   79.89
   1  -1   7 1257.97   79.89
   1  -1   7 1220.28   79.99
  -1  -1  -7 1213.18   80.29
   1   1   7 1185.48   80.09
   1   1   7 1300.17   79.99
   1   1   7 1287.97   80.09
  -1   1  -7 1223.48   79.89
   1   1   7 1267.47   80.09
  -1   1  -7 1292.57   79.89
   1   1   7 1200.48   80.29
   2  -1   7  122.29    8.10
   2  -1   7   96.29    7.90
  -2  -1  -7  107.09    7.70
   2  -1   7  108.39    7.70
  -2  -1  -7  112.39    7.90
   2  -1   7  128.99    8.40
  -2  -1  -7  118.59    7.90
  -2  -1  -7   96.29    7.90
   2  -1   7  104.09    7.50
   2  -1   7   92.39    7.80
  -2   1  -7  108.79    7.60
   2   1   7  103.19    8.20
   2   1   7  114.69    8.00
   2   1   7  107.99    7.80
  -2   1  -7  104.69    7.70
   2   1   7  115.29    7.90
   2   1   7  103.89    8.00
   3  -1   7   99.79    6.40
  -3  -1  -7   92.69    6.70
  -3  -1  -7   86.19    6.60
  -3  -1  -7   89.89    7.00
   3  -1   7   88.79    6.40
   3  -1   7   80.59    6.60
   3  -1   7   82.59    6.70
  -3  -1  -7   82.59    6.70
  -3  -1  -7   86.29    6.90
   3  -1   7   92.99    7.10
   3   1   7   87.79    6.80
   3   1   7   87.49    7.00
  -3   1  -7   88.49    6.60
   3   1   7   86.69    6.90
  -3   1  -7   94.49    6.80
   3   1   7   91.59    6.60
   3   1   7   82.59    6.90
  -4  -1  -7  993.20   63.19
  -4  -1  -7  941.81   63.19
  -4  -1  -7  988.60   63.29
   4  -1   7  983.60   63.09
   4  -1   7 1016.70   63.19
  -4  -1  -7  928.71   63.09
   4  -1   7  985.90   62.99
   4  -1   7 1009.50   62.99
   4  -1   7  984.90   63.09
   4   1   7 1004.50   63.09
   4   1   7 1027.60   63.09
   4   1   7  996.70   63.29
  -4   1  -7 1009.80   63.09
   4   1   7  995.60   63.29
   4   1   7  983.50   63.19
   5  -1   7   24.40    4.10
   5  -1   7   28.90    3.40
  -5  -1  -7   26.10    4.30
   5  -1   7   29.10    4.10
   5  -1   7   35.40    4.70
   5  -1   7   30.30    4.20
  -5  -1  -7   26.80    3.90
   5  -1   7   29.50    4.50
  -5  -1  -7   25.60    4.20
  -5  -1  -7   29.40    3.70
   5   1   7   24.10    3.90
  -5   1  -7   31.60    3.90
   5   1   7   25.80    4.20
   5   1   7   27.80    4.30
  -5   1  -7   30.40    4.10
  -5   1  -7   25.90    3.90
   5   1   7   29.30    4.20
   5   1   7   29.60    5.00
   5   1   7   25.90    4.10
   6  -1   7  570.64   36.20
  -6  -1  -7  555.04   36.40
   6  -1   7  548.85   36.30
   6  -1   7  564.34   36.40
  -6  -1  -7  586.54   36.50
   6  -1   7  551.34   36.30
   6  -1   7  549.65   36.20
  -6  -1  -7  550.34   36.30
  -6  -1  -7  560.24   36.30
   6  -1   7  576.14   36.20
   6   1   7  594.14   36.30
  -6   1  -7  473.65   36.60
  -6   1  -7  531.95   36.10
  -6   1  -7  559.84   36.20
   6   1   7  569.14   36.40
   6   1   7  615.74   36.60
   6   1   7  540.95   36.30
   6   1   7  562.14   36.70
  -6   1  -7  593.04   36.60
   6   1   7  549.85   36.30
   7  -1   7  199.98   14.30
  -7  -1  -7  196.78   14.00
   7  -1   7  200.08   14.10
   7  -1   7  205.28   14.30
   7  -1   7  190.88   14.00
  -7  -1  -7  186.38   14.30
   7  -1   7  194.38   14.50
  -7  -1  -7  215.28   14.30
   7  -1   7  188.68   14.10
  -7  -1  -7  199.88   14.00
  -7   1  -7  204.08   14.40
   7   1   7  201.28   14.20
   7   1   7  186.68   14.80
   7   1   7  212.08   14.10
   7   1   7  204.78   14.20
   7   1   7  197.38   14.20
  -7   1  -7  198.28   13.80
  -7   1  -7  178.48   13.90
   7   1   7  218.48   14.60
   8  -1   7   27.90    4.10
   8  -1   7   16.30    4.60
  -8  -1  -7   13.20    3.80
   8  -1   7   19.90    4.30
  -8  -1  -7   20.50    4.20
   8  -1   7   16.30    3.70
  -8  -1  -7   22.30    3.80
   8  -1   7    6.90    5.10
   8  -1   7   19.10    4.70
   8   1   7   23.80    4.20
  -8   1  -7   23.30    5.40
   8   1   7   15.00    4.50
   8   1   7   20.00    4.60
   8   1   7   15.80    4.40
  -8   1  -7   19.60    3.60
   8   1   7   19.70    4.00
  -8   1  -7   18.00    3.80
  -8   1  -7   22.60    4.80
   9  -1   7   24.30    4.70
   9  -1   7   24.30    4.60
  -9  -1  -7   14.20    5.00
   9  -1   7   24.50    5.20
  -9  -1  -7   15.00    4.20
   9  -1   7   26.90    6.60
  -9  -1  -7   20.20    5.00
   9   1   7   16.70    4.50
  -9   1  -7   17.60    5.80
   9   1   7   17.70    5.60
  -9   1  -7   19.90    5.20
   9   1   7   16.50    4.70
  -9   1  -7   28.30    6.10
   9   1   7   27.10    5.40
  -9   1  -7   17.50    4.30
  10  -1   7   71.69    9.60
  10  -1   7   81.59   11.70
  10  -1   7   57.89    8.40
 -10  -1  -7   54.59    7.80
 -10  -1  -7   55.79    8.70
 -10  -1  -7   64.69    9.10
  10  -1   7   57.99    7.50
  10  -1   7   75.59    9.80
 -10   1  -7   58.39    7.90
 -10   1  -7   68.69    9.60
 -10   1  -7   79.99   11.90
  10   1   7   67.89    8.80
  10   1   7   66.79   10.30
  10   1   7   48.10    6.90
  10   1   7   57.39    8.30
  10   1   7   65.29    8.60
 -10   1  -7   60.29    7.90
 -11  -1  -7   20.80    4.80
 -11  -1  -7   18.40    6.40
 -11  -1  -7   24.50    5.90
  11  -1   7   17.60    5.40
  11  -1   7   19.00    5.60
  11  -1   7   25.90    6.80
  11   1   7   25.70    6.60
 -11   1  -7   21.40    6.00
  11   1   7   25.30    5.80
 -11   1  -7   24.70    7.30
  11   1   7   29.00    4.80
 -11   1  -7   16.20    5.20
 -11   1  -7   20.00    5.20
  11   1   7    9.60    8.90
  12  -1   7   15.60    6.10
  12  -1   7   15.80    6.00
 -12  -1  -7    8.80    5.30
 -12  -1  -7   16.30    6.50
  12  -1   7   16.20    6.70
 -12  -1  -7    4.90    7.10
  12   1   7   22.60    7.40
  12   1   7   14.40    5.90
  12   1   7   24.20    6.20
  12   1   7   22.90    5.00
 -12   1  -7   23.50    5.70
 -13  -1  -7   69.49    9.40
  13  -1   7   73.09   13.40
 -13  -1  -7   60.29    8.30
  13  -1   7   71.49   10.90
  13  -1   7   56.29    8.50
 -13  -1  -7   58.39    8.90
  13   1   7   75.39   11.40
  13   1   7   59.79    9.70
 -13   1  -7   81.59   10.70
  13   1   7   61.99    9.10
  13   1   7   58.69    9.30
 -14  -1  -7   11.10    9.30
  14  -1   7   11.00    7.50
  14  -1   7   26.10    9.50
 -14  -1  -7   14.40    7.10
  14  -1   7   12.70    7.20
 -14   1  -7   18.20   11.00
  14   1   7   10.30    7.70
  14   1   7   30.00    6.80
 -14   1  -7   15.60    7.50
  14   1   7   15.50    7.70
  14   1   7    4.20    9.50
 -15  -2   7  -18.00    9.60
 -15  -2   7    2.60    7.00
 -15  -2   7    3.20    7.60
  15  -2  -7   -2.10   11.90
 -15   2   7    6.40   10.70
  15   2  -7   20.40    8.30
  14  -2  -7  -15.00   11.30
 -14  -2   7    7.00    7.20
 -14  -2   7    5.30    6.10
 -14  -2   7    1.00    8.50
 -14   2   7    7.10    9.50
  14   2  -7    3.40    6.80
 -13  -2   7   16.40    6.20
  13  -2  -7    3.40   10.70
 -13  -2   7   10.70    6.10
 -13  -2   7    2.20    7.50
  13   2  -7   12.20    6.30
 -13   2   7   14.30    8.30
 -13   2   7   23.50   11.70
  12  -2  -7   16.10   11.30
 -12  -2   7   27.20    5.90
 -12  -2   7   31.80    7.10
 -12  -2   7   13.50    5.70
  12   2  -7   33.60    5.80
 -12   2   7   30.20    8.90
 -12   2   7   29.60    9.40
 -11  -2   7   -3.00    4.60
  11  -2  -7    6.60   10.70
 -11  -2   7    1.90    4.90
 -11  -2   7    7.60    5.80
  11  -2  -7  -14.20    8.60
 -11   2   7    7.20    7.40
 -11   2   7    6.80    7.30
  11   2  -7   10.90    4.50
 -10  -2   7  210.48   16.40
 -10  -2   7  174.48   14.90
  10  -2  -7  156.08   20.40
 -10  -2   7  183.58   15.20
  10  -2  -7  223.58   19.80
  10  -2  -7  187.08   19.50
 -10   2   7  171.28   17.30
 -10   2   7  183.58   16.80
  10   2  -7  229.98   15.10
   9  -2  -7  130.09   16.60
   9  -2  -7  149.99   16.80
   9  -2  -7  191.58   17.80
  -9  -2   7  171.38   13.70
  -9  -2   7  164.88   14.40
  -9  -2   7  157.68   13.40
  -9  -2   7  194.98   14.60
  -9   2   7  187.68   17.90
  -9   2   7  151.58   14.80
   9   2  -7  204.78   13.40
  -9   2   7  166.88   15.90
  -8  -2   7  259.17   19.60
   8  -2  -7  266.67   21.60
  -8  -2   7  251.57   18.60
  -8  -2   7  280.27   18.70
  -8  -2   7  273.07   18.50
   8  -2  -7  253.47   19.90
   8  -2  -7  250.57   20.10
  -8   2   7  246.28   21.70
   8   2  -7  275.17   18.20
  -8   2   7  264.67   19.60
   8   2  -7  289.37   20.30
  -8   2   7  262.47   20.00
  -7  -2   7   17.80    4.20
  -7  -2   7   16.40    3.50
   7  -2  -7   19.40    5.40
  -7  -2   7   13.50    4.00
  -7  -2   7   11.00    4.90
   7  -2  -7   28.90    7.00
  -7   2   7   16.30    5.80
   7   2  -7   11.80    4.70
  -7   2   7   25.10    7.00
  -7   2   7   13.30    5.80
   7   2  -7   12.80    4.40
  -6  -2   7  147.19   10.90
  -6  -2   7  144.69   11.10
  -6  -2   7  146.69   12.40
   6  -2  -7  164.38   13.90
   6  -2  -7  135.79   11.80
   6  -2  -7  136.09   12.00
   6   2  -7  142.49   11.30
  -6   2   7  127.69   13.50
  -6   2   7  153.48   12.80
   6   2  -7  139.79   11.50
  -6   2   7  140.99   12.50
  -5  -2   7  292.57   18.40
  -5  -2   7  245.48   19.40
  -5  -2   7  275.97   18.30
   5   2  -7  267.87   18.60
   5   2  -7  264.97   18.40
  -4  -2   7  723.43   45.60
   4  -2  -7  676.03   45.90
  -4  -2   7  728.13   45.50
  -4  -2   7  678.83   46.20
   4  -2  -7  690.13   45.90
   4  -2  -7  726.43   46.60
   4   2  -7  732.63   45.70
   4   2  -7  697.33   45.70
   4   2  -7  699.83   45.30
  -4   2   7  721.73   46.20
  -4   2   7  713.33   46.10
  -3  -2   7 1409.96   86.79
   3  -2  -7 1330.27   86.99
  -3  -2   7 1355.16   87.29
  -3  -2   7 1408.36   86.79
   3  -2  -7 1340.37   87.49
   3  -2  -7 1273.27   86.89
  -3   2   7 1362.16   87.19
  -3   2   7 1334.27   87.09
   3   2  -7 1466.85   86.89
   3   2  -7 1358.16   86.59
   2  -2  -7 1006.60   64.59
   2  -2  -7 1023.10   65.19
   2  -2  -7 1005.00   64.49
  -2   2   7 1002.80   65.09
  -2   2   7 1008.60   64.69
  -2   2   7  969.10   64.59
   2   2  -7 1049.59   64.19
   1  -2  -7  273.47   17.00
   1  -2  -7  233.58   16.60
   1   2  -7  251.37   16.30
  -1   2   7  243.58   16.40
   0  -2  -7 1637.14   99.89
   0  -2  -7 1566.04   99.89
   0  -2  -7 1490.35   99.69
   0  -2   7 1571.94   99.89
   0  -2  -7 1494.75   99.79
   0   2   7 1785.12  100.09
   0   2   7 1500.55   99.79
   0   2   7 1486.45   99.69
   0   2   7 1615.54   99.99
  -1  -2  -7 3622.34  216.88
  -1  -2  -7 3445.26  216.78
  -1  -2  -7 2971.10  216.78
   1  -2   7 3329.87  216.88
  -1  -2  -7 3604.84  216.88
   1   2   7 3391.66  216.88
   1   2   7 3399.06  216.88
   1   2   7 3525.75  216.88
   1   2   7 3511.85  216.78
   1   2   7 3458.85  216.78
   1   2   7 3418.26  216.68
  -2  -2  -7 1034.30   65.89
   2  -2   7 1030.80   65.99
  -2  -2  -7 1068.09   65.69
  -2  -2  -7 1063.59   65.69
  -2  -2  -7 1011.10   65.69
   2   2   7  986.70   65.79
   2   2   7 1029.00   65.79
   2   2   7 1010.40   65.59
   2   2   7 1038.30   65.69
   2   2   7 1033.60   65.69
   3  -2   7  742.03   48.60
  -3  -2  -7  737.93   48.40
   3  -2   7  752.22   48.30
  -3  -2  -7  754.72   48.40
  -3  -2  -7  720.13   48.30
  -3  -2  -7  783.62   48.20
  -3  -2  -7  759.02   48.30
   3   2   7  779.32   48.20
   3   2   7  747.63   48.40
   3   2   7  761.22   48.40
   3   2   7  753.12   48.40
   3   2   7  743.63   48.20
  -4  -2  -7   64.99    5.70
   4  -2   7   55.29    7.50
  -4  -2  -7   45.70    5.20
   4  -2   7   55.69    5.50
  -4  -2  -7   52.49    5.30
  -4  -2  -7   61.69    5.80
   4   2   7   53.29    5.70
   4   2   7   48.70    6.30
   4   2   7   46.70    4.90
   4   2   7   58.09    5.40
   4   2   7   55.29    5.50
   4   2   7   53.99    5.20
   5  -2   7  439.66   29.60
  -5  -2  -7  463.45   29.80
  -5  -2  -7  462.25   29.80
  -5  -2  -7  464.55   29.80
   5  -2   7  433.76   30.70
   5  -2   7  470.25   29.50
  -5  -2  -7  433.66   29.70
  -5   2  -7  445.56   29.40
   5   2   7  453.65   30.10
   5   2   7  470.55   29.80
   5   2   7  478.55   29.70
   5   2   7  477.65   29.80
  -5   2  -7  408.36   30.50
   5   2   7  453.45   29.40
  -5   2  -7  458.45   30.10
   5   2   7  473.05   29.70
  -6  -2  -7   75.69    7.10
  -6  -2  -7   79.29    7.10
   6  -2   7   88.29    9.80
   6  -2   7   67.59    6.60
  -6  -2  -7   69.49    6.90
   6  -2   7   66.49    6.80
   6  -2   7   77.19    8.00
  -6  -2  -7   90.79    7.20
   6   2   7   77.59    7.10
   6   2   7   74.19    6.80
   6   2   7   85.79    7.00
  -6   2  -7   68.59    6.30
  -6   2  -7   55.59   10.10
   6   2   7   73.69    6.90
  -6   2  -7   68.59    8.20
   6   2   7   74.29    8.10
   6   2   7   79.09    6.30
  -7  -2  -7    9.80    3.30
   7  -2   7   10.60    4.00
  -7  -2  -7   10.60    3.40
   7  -2   7    6.00    4.50
   7  -2   7   13.00    3.40
   7  -2   7   11.70    3.30
  -7  -2  -7   10.20    3.50
   7  -2   7   19.00    4.20
   7   2   7   15.70    3.60
   7   2   7   10.30    3.00
  -7   2  -7   11.80    2.90
  -7   2  -7    9.60    4.80
  -7   2  -7   11.40    6.00
  -7   2  -7    7.50    3.20
   7   2   7    9.90    3.80
   7   2   7   10.10    3.40
  -8  -2  -7  142.89   11.10
  -8  -2  -7  143.19   11.10
   8  -2   7  112.19   11.80
  -8  -2  -7  136.29   11.10
   8  -2   7  111.99   11.90
   8  -2   7  132.89   10.70
   8  -2   7  151.68   12.30
   8  -2   7  136.69   10.80
  -8   2  -7  132.69   12.60
   8   2   7  139.39   11.20
   8   2   7  136.49   12.40
   8   2   7  162.08   11.70
  -8   2  -7  136.79   10.60
   8   2   7  130.09   10.40
   8   2   7  139.59   11.00
  -8   2  -7  128.99   10.50
   9  -2   7   53.49    7.40
   9  -2   7   45.00    8.00
  -9  -2  -7   50.69    7.60
  -9  -2  -7   47.70    7.30
  -9  -2  -7   51.59    7.50
   9  -2   7   49.90    8.00
   9   2   7   49.10    6.60
  -9   2  -7   44.40    5.80
   9   2   7   55.09    8.00
   9   2   7   58.99    7.40
  -9   2  -7   48.20    7.00
   9   2   7   38.90    8.30
  -9   2  -7   68.69   10.10
   9   2   7   50.39    8.40
  10  -2   7    9.40    8.00
 -10  -2  -7   10.00    4.80
  10  -2   7    9.70    4.50
  10  -2   7   18.00    4.60
 -10  -2  -7   11.10    4.80
 -10  -2  -7    8.70    4.40
  10   2   7   11.40    6.20
 -10   2  -7   15.60    4.70
 -10   2  -7   11.80    4.30
  10   2   7   14.30    4.80
  10   2   7   17.00    4.60
  10   2   7   10.70    4.40
 -11  -2  -7   29.50    5.80
  11  -2   7   30.70    5.90
  11  -2   7   33.60    7.30
 -11  -2  -7   32.30    6.00
 -11  -2  -7   31.50    6.20
  11  -2   7   27.70    5.90
  11   2   7   26.40    6.10
  11   2   7   35.90    5.40
 -11   2  -7   21.70    5.80
 -11   2  -7   33.80   10.30
  11   2   7   41.00    6.40
  11   2   7   28.00    7.60
  12  -2   7    2.60    6.80
  12  -2   7   -1.30    5.50
 -12  -2  -7    4.40    5.90
  12  -2   7    2.70    5.40
 -12  -2  -7    1.10    5.90
 -12  -2  -7    2.40    5.40
  12   2   7    6.10    5.90
  12   2   7    6.10    5.70
 -12   2  -7   12.70    5.50
  12   2   7    2.60    5.00
 -12   2  -7   13.30    8.50
  12   2   7   12.30    7.60
 -13  -2  -7    3.30    6.30
 -13  -2  -7    4.20    7.40
 -13  -2  -7    4.50    7.10
  13  -2   7    5.60    6.10
  13  -2   7    9.80    9.40
  13  -2   7   12.60    6.40
  13   2   7   13.50    9.40
  13   2   7   12.40    6.10
 -13   2  -7   13.50    8.80
  13   2   7   12.40    7.00
  13   2   7   19.50    7.00
  14  -2   7    6.70    7.30
 -14  -2  -7    5.70    8.80
  14  -2   7    5.00    7.50
  14  -2   7   18.80   10.70
 -14  -2  -7    9.10    7.00
  14   2   7   14.50   10.80
  14   2   7    5.40    8.00
  14   2   7   10.70    7.90
  14   2   7   16.00    6.90
 -14  -3   7   -4.10    6.10
 -14  -3   7    1.70    5.50
  14  -3  -7  -20.70   12.90
 -14  -3   7  -12.70    8.80
  14   3  -7    4.10    5.80
 -14   3   7   14.30   11.30
  14   3  -7   12.60    7.90
 -13  -3   7   -2.20    7.50
 -13  -3   7    2.90    5.10
  13  -3  -7   -1.80   13.60
 -13  -3   7    1.90    5.50
  13   3  -7   10.90    5.30
 -13   3   7   16.40   11.30
 -13   3   7   -4.10   17.20
  13   3  -7    4.80    6.70
 -12  -3   7   14.60    5.10
 -12  -3   7   10.50    7.50
  12  -3  -7    5.20   13.40
 -12  -3   7    5.90    4.60
 -12   3   7   10.70   16.10
  12   3  -7    8.10    5.00
  12   3  -7    8.20    5.80
 -12   3   7    9.70    9.00
 -11  -3   7  210.08   15.30
 -11  -3   7  220.08   15.30
  11  -3  -7  208.38   23.20
 -11  -3   7  204.78   17.80
  11  -3  -7  172.08   23.30
 -11   3   7  206.58   26.60
  11   3  -7  179.78   15.10
 -11   3   7  184.98   19.00
  11   3  -7  222.58   16.90
 -11   3   7  198.88   18.70
 -10  -3   7   11.20    4.30
  10  -3  -7   15.10   10.20
  10  -3  -7   36.70   11.40
  10  -3  -7   15.90    9.30
  10   3  -7   22.60    4.70
 -10   3   7   16.20    7.80
 -10   3   7   17.00    8.00
 -10   3   7   37.40   12.10
   9  -3  -7  107.49   15.00
  -9  -3   7  146.79   11.60
   9  -3  -7  176.48   19.50
  -9  -3   7  167.78   14.40
  -9  -3   7  142.49   11.60
   9   3  -7  135.29   11.20
  -9   3   7  121.69   15.20
  -9   3   7  151.58   17.40
  -9   3   7  160.48   16.80
   9   3  -7  137.69   12.50
   8  -3  -7   74.49   11.50
  -8  -3   7   85.59    8.00
  -8  -3   7   93.39   10.50
   8  -3  -7   87.19   11.90
  -8  -3   7   87.49    8.50
   8  -3  -7   68.49   11.40
  -8  -3   7   94.89    8.30
  -8   3   7   85.39   14.20
  -8   3   7   71.79   11.30
  -8   3   7   71.59   11.70
   8   3  -7   91.59    7.70
  -7  -3   7  408.76   26.00
   7  -3  -7  381.16   27.10
   7  -3  -7  360.86   29.30
   7  -3  -7  397.26   27.20
  -7  -3   7  402.96   27.60
  -7  -3   7  419.76   25.90
  -7   3   7  362.66   28.60
   7   3  -7  381.76   25.80
  -7   3   7  387.86   27.50
  -7   3   7  401.76   27.40
  -6  -3   7   19.00    5.70
   6  -3  -7   21.10    5.70
  -6  -3   7   30.50    4.80
  -6  -3   7   34.10    4.20
   6  -3  -7   20.00    5.80
  -6   3   7   34.50    8.50
  -6   3   7   24.40    6.60
   6   3  -7   28.40    4.80
  -6   3   7   31.80    6.40
   6   3  -7   31.60    5.30
   6   3  -7   31.90    4.50
   5  -3  -7   23.40    6.60
  -5  -3   7   22.50    3.60
  -5  -3   7   16.10    5.10
  -5  -3   7   22.80    3.40
   5   3  -7   22.40    4.00
  -5   3   7   28.80    7.20
   5   3  -7   25.60    3.50
  -5   3   7   28.40    7.50
   5   3  -7   19.70    4.60
  -5   3   7   39.00    6.20
  -4  -3   7   70.19    9.20
  -4  -3   7   74.19    6.70
   4  -3  -7   78.69   10.30
   4   3  -7   69.29    6.20
   4   3  -7   84.09    7.50
   3  -3  -7 1092.19   70.79
   3  -3  -7 1099.89   71.99
   3  -3  -7 1069.89   71.49
  -3  -3   7 1109.49   71.29
   3  -3  -7 1044.10   70.69
   3  -3  -7 1061.69   70.59
  -3   3   7 1123.19   70.99
  -3   3   7 1167.88   71.09
   3   3  -7 1178.28   70.49
  -3   3   7 1105.59   71.79
   2  -3  -7   28.10    4.40
   2  -3  -7   32.30    4.60
   2  -3  -7   27.40    3.90
  -2  -3   7   27.80    4.80
  -2   3   7   24.50    6.50
  -2   3   7   30.90    4.60
  -2   3   7   31.70    4.90
   2   3  -7   28.60    3.40
  -1  -3   7   62.29    5.30
   1   3  -7   79.59    6.00
   0  -3  -7 4863.51  303.07
   0  -3  -7 4539.35  302.97
   0  -3  -7 5048.09  303.07
   0  -3  -7 4960.80  303.17
   0  -3   7 4403.36  302.77
   0   3   7 4816.12  303.17
   0   3   7 4809.72  303.97
   0   3  -7 4788.12  302.97
   0   3   7 4755.22  303.07
   0   3   7 4965.00  303.07
   0   3   7 4669.73  303.07
   0   3   7 4868.41  303.27
  -1  -3  -7   90.59    8.40
  -1  -3  -7   90.49    8.00
  -1  -3  -7  108.19    7.80
   1  -3   7   94.99    7.60
  -1  -3  -7  109.49    7.80
   1   3   7  115.59    8.00
  -1   3  -7  102.19    7.90
   1   3   7   91.79    8.80
   1   3   7  110.59   10.60
   1   3   7   90.99    8.60
  -2  -3  -7   81.99    6.40
  -2  -3  -7   84.39    6.50
   2  -3   7   91.39    8.40
   2  -3   7   78.39    9.80
  -2  -3  -7   78.19    7.50
  -2  -3  -7   68.79    7.00
   2   3   7   92.29    7.40
   2   3   7   90.89    6.60
   2   3   7   69.29    7.40
   2   3   7   63.89    6.70
  -3  -3  -7   -2.20    3.00
   3  -3   7   -0.70    6.30
  -3  -3  -7   -3.30    2.40
  -3  -3  -7   -1.30    2.60
  -3  -3  -7   -3.30    2.30
  -3  -3  -7    0.40    1.90
   3  -3   7    5.30    4.80
   3   3   7   -4.60    2.30
   3   3   7   -1.30    2.50
   3   3   7    0.80    3.40
   3   3   7    0.10    3.10
  -3   3  -7    5.20    3.50
  -4  -3  -7    4.30    3.40
   4  -3   7    8.00    5.00
  -4  -3  -7    8.20    2.30
  -4  -3  -7    9.60    2.90
   4  -3   7   16.20    7.60
  -4  -3  -7    8.90    2.80
  -4  -3  -7    5.00    3.20
   4   3   7   14.80    3.10
   4   3   7    9.00    3.70
   4   3   7    7.20    3.20
   4   3   7    6.60    2.70
   4   3   7    2.00    2.90
   4   3   7   15.30    3.50
  -5  -3  -7  299.07   20.50
  -5  -3  -7  301.37   20.50
  -5  -3  -7  312.17   20.50
   5  -3   7  272.97   23.20
  -5  -3  -7  295.67   22.40
   5   3   7  298.47   20.30
   5   3   7  307.67   20.20
   5   3   7  297.97   20.50
  -5   3  -7  327.97   21.40
   5   3   7  294.47   20.50
  -6  -3  -7   52.09    6.30
  -6  -3  -7   56.39    6.10
   6  -3   7   67.59    8.90
  -6  -3  -7   43.90    6.50
   6   3   7   43.70    5.50
   6   3   7   55.19    5.90
   6   3   7   58.29    6.20
   6   3   7   55.69    5.90
  -6   3  -7   40.30    7.00
  -6   3  -7   69.09    8.50
  -7  -3  -7   69.89    8.20
   7  -3   7   90.59   10.40
  -7  -3  -7   89.39    8.20
  -7  -3  -7   81.49    8.00
  -7   3  -7   58.59    9.40
  -7   3  -7   76.09    9.90
   7   3   7   74.59    7.80
   7   3   7   87.49    7.70
   7   3   7   69.99    8.40
   8  -3   7    1.30    5.30
   8  -3   7   -0.80    4.60
  -8  -3  -7   -1.00    5.00
  -8  -3  -7   -5.10    3.70
   8   3   7   -7.70    3.90
   8   3   7   -1.80    4.00
   8   3   7   -4.90    3.90
  -8   3  -7    3.90    5.70
  -8   3  -7   -1.80    3.20
  -9  -3  -7   -0.50    4.30
   9  -3   7   -1.80    6.00
  -9  -3  -7    6.80    4.20
   9  -3   7    2.90    3.70
   9  -3   7    7.10    7.40
  -9  -3  -7   -3.90    4.30
  -9   3  -7    4.80    3.70
   9   3   7    4.90    4.40
   9   3   7   -0.50    4.10
   9   3   7    1.40    4.20
  -9   3  -7   -7.60    6.30
  10  -3   7    7.50    4.40
 -10  -3  -7   -0.30    4.90
  10  -3   7   -6.50    6.50
 -10  -3  -7    0.00    4.60
 -10  -3  -7    1.30    4.50
  10   3   7    4.60    4.70
 -10   3  -7   -4.70    7.20
  10   3   7    3.90    4.70
  10   3   7    2.30    4.90
 -10   3  -7    8.60    4.50
 -11  -3  -7   29.00    6.30
 -11  -3  -7   20.90    6.20
  11  -3   7    6.20    9.00
 -11  -3  -7   20.00    6.10
  11  -3   7   18.90    5.50
  11  -3   7   23.60    5.90
 -11   3  -7   32.50    9.20
  11   3   7   29.20    7.10
  11   3   7   27.10    6.50
 -11   3  -7   26.10    5.90
  11   3   7   24.40    6.00
  12  -3   7   24.80   10.80
 -12  -3  -7   28.20    7.20
  12  -3   7   35.80    6.70
  12  -3   7   20.80    6.20
 -12  -3  -7   36.80    7.00
 -12  -3  -7   28.20    6.90
 -12   3  -7   35.50   10.30
  12   3   7   33.40    7.60
  12   3   7   32.70    7.10
 -13  -3  -7   37.30    7.90
  13  -3   7   43.90    7.80
 -13  -3  -7   27.00    8.20
  13  -3   7   37.50   12.30
 -13  -3  -7   23.50    8.80
  13  -3   7   23.50    6.80
  13   3   7   31.40    8.10
  13   3   7   43.10    8.30
  13   3   7   35.50    8.40
 -14  -4   7   26.30    7.00
 -14  -4   7   29.50    7.20
 -14  -4   7    5.80    9.60
  14   4  -7   30.20    8.70
  14   4  -7   16.40    7.20
 -13  -4   7    0.20    4.50
 -13  -4   7   -7.70    7.80
 -13  -4   7    4.90    5.40
  13  -4  -7  -28.50   16.00
  13   4  -7    5.80    7.10
  13   4  -7   -0.90    5.40
 -12  -4   7   14.80    4.90
 -12  -4   7    6.00    8.00
 -12  -4   7    8.50    4.50
  12  -4  -7   -9.40   14.00
 -12   4   7   24.50   10.70
 -12   4   7   11.40   16.40
  12   4  -7   17.70    5.50
  12   4  -7   12.70    6.50
 -11  -4   7   11.80    4.50
 -11  -4   7   18.10    4.70
 -11  -4   7   14.10    7.20
  11  -4  -7   32.60   14.90
 -11   4   7   22.20   10.20
 -11   4   7   20.80   13.10
  11   4  -7   18.60    5.20
  10  -4  -7   85.89   15.30
 -10  -4   7   96.39    8.90
 -10  -4   7   84.69   12.30
 -10  -4   7   96.39    8.70
 -10   4   7   92.39   16.40
  10   4  -7   76.39    9.20
 -10   4   7  112.89   15.20
  -9  -4   7    0.10    3.40
   9  -4  -7   15.20   10.90
   9  -4  -7   10.90    9.40
  -9  -4   7    2.30    3.40
   9  -4  -7   16.20    8.80
  -9  -4   7    5.80    6.30
  -9   4   7   -1.70    8.10
  -9   4   7    5.70   10.60
   9   4  -7    0.60    3.90
  -9   4   7   15.40    8.00
  -8  -4   7  600.74   45.70
  -8  -4   7  627.84   41.70
  -8  -4   7  711.63   40.60
   8  -4  -7  560.34   42.20
  -8  -4   7  624.44   41.20
   8  -4  -7  612.04   42.50
  -8   4   7  663.93   42.70
   8   4  -7  603.24   41.10
  -8   4   7  597.94   42.30
   7  -4  -7   -0.40    9.30
   7  -4  -7   -1.80   11.10
  -7  -4   7    5.50    3.30
   7  -4  -7    4.90    5.70
  -7  -4   7   -2.70    5.40
   7   4  -7    9.00    3.50
  -7   4   7    7.90    6.90
  -7   4   7    4.00    6.80
  -7   4   7   15.90    8.50
  -7   4   7    9.30    8.90
  -6  -4   7  162.28   14.40
   6  -4  -7  144.19   12.70
   6  -4  -7  162.58   18.10
  -6  -4   7  160.68   11.30
   6  -4  -7  141.79   13.60
  -6   4   7  165.48   14.40
  -6   4   7  161.08   14.50
  -6   4   7  153.38   16.50
  -6   4   7  149.69   16.10
   6   4  -7  163.48   11.90
   5  -4  -7   16.50    4.30
   5  -4  -7   16.30    5.20
   5  -4  -7   13.90    8.00
  -5  -4   7   10.00    5.00
  -5   4   7   21.40    6.50
  -5   4   7    9.30    8.80
   5   4  -7    4.60    3.40
  -5   4   7    9.80    7.90
  -5   4   7    8.30    6.70
   4  -4  -7   18.20    7.30
  -4  -4   7   30.80    5.80
   4  -4  -7   22.30    7.90
   4  -4  -7   24.60    5.40
   4  -4  -7   20.80    4.50
   4  -4  -7   24.70    5.10
  -4   4   7   31.20    6.10
  -4   4   7   37.10    6.50
   4   4  -7   23.60    4.10
  -4   4   7   19.00    8.20
  -3  -4   7  104.39   10.90
   3  -4  -7   83.09   11.50
   3  -4  -7   83.49    9.00
   3  -4  -7  108.89   13.60
   3  -4  -7  105.99    9.50
   3   4  -7   95.39    8.10
  -3   4   7  103.09   10.10
  -3   4   7   87.69   12.30
  -3   4   7   93.59   10.60
   2  -4  -7  144.69   14.70
  -2  -4   7  133.79    9.80
  -2  -4   7  160.78   13.00
   2  -4  -7  135.19   11.20
   2  -4  -7  118.99   11.00
  -2   4   7  149.49   11.80
   2   4  -7  150.08   10.60
  -2   4   7  156.98   11.90
  -2   4   7  148.69   14.50
  -2   4   7  123.69   10.50
   1  -4  -7   20.60    4.30
  -1  -4   7    8.50    4.80
  -1  -4   7   14.80    2.60
  -1   4   7   24.60    4.80
   1   4  -7   17.90    3.60
  -1   4   7    2.30    7.20
  -1   4   7   15.60    3.00
   0  -4  -7  113.79    9.20
   0  -4   7  114.39   11.10
   0  -4  -7   90.49    8.80
   0  -4  -7  108.49    8.50
   0  -4   7   96.09    7.90
   0   4   7  104.99    9.00
   0   4   7   90.29    8.50
   0   4  -7  120.49    8.90
   0   4   7  130.59    9.80
   0   4   7   96.19   12.40
   0   4   7  131.59   10.30
  -1  -4  -7   73.29    6.60
  -1  -4  -7   71.69    6.40
   1  -4   7   75.69    6.50
  -1  -4  -7   71.29    6.80
  -1  -4  -7   85.39    7.20
   1   4   7   63.19    7.90
   1   4   7   81.39    7.20
   1   4   7   88.59    8.60
   1   4   7   65.99    6.90
   1   4   7   59.79   10.50
  -1   4  -7   71.99    7.30
   1   4   7   78.09    8.10
   1   4   7   71.59    6.60
   2  -4   7    1.90    2.80
  -2  -4  -7    0.90    2.60
  -2  -4  -7   -0.20    2.70
  -2  -4  -7   -1.10    3.60
  -2  -4  -7    4.20    2.80
   2  -4   7   -4.40    5.20
   2   4   7    4.00    3.20
   2   4   7   -2.10    3.50
   2   4   7   -0.80    2.50
   2   4   7   -8.20    3.50
   2   4   7    1.50    3.50
   2   4   7    4.10    6.30
   2   4   7    2.20    2.60
  -3  -4  -7  138.19   10.30
  -3  -4  -7  128.19    9.80
  -3  -4  -7  143.49   11.00
   3  -4   7  126.09   14.80
   3  -4   7  118.79   10.10
   3   4   7  125.59   10.80
   3   4   7  144.39   13.60
   3   4   7  144.99   10.80
  -3   4  -7  137.79   11.40
   3   4   7  136.89   10.40
   3   4   7  129.29   11.50
  -4  -4  -7    8.60    2.70
  -4  -4  -7   11.90    3.60
   4  -4   7    4.90    3.50
  -4  -4  -7   11.00    3.90
   4   4   7    6.80    3.60
   4   4   7    5.70    3.80
   4   4   7    4.30    3.70
  -5  -4  -7  294.57   19.00
   5  -4   7  236.78   18.50
  -5  -4  -7  280.97   18.70
  -5  -4  -7  240.48   18.00
  -5  -4  -7  270.57   19.00
  -5   4  -7  260.57   19.60
   5   4   7  275.37   18.90
   5   4   7  259.87   18.70
   5   4   7  285.47   18.60
  -6  -4  -7  951.50   58.49
  -6  -4  -7  931.91   58.39
  -6  -4  -7  949.71   58.49
   6  -4   7  819.12   58.19
   6  -4   7  894.91   59.79
  -6   4  -7  882.51   59.19
   6   4   7  907.41   58.39
   6   4   7  914.41   58.29
   6   4   7  875.91   58.39
   7  -4   7   52.79    7.20
  -7  -4  -7   60.39    6.90
   7  -4   7   54.59    9.80
  -7  -4  -7   53.59    7.60
  -7  -4  -7   56.59    9.20
   7   4   7   45.60    7.60
   7   4   7   57.29    7.60
   7   4   7   54.99    6.60
  -8  -4  -7   43.20    7.50
  -8  -4  -7   37.00    5.90
   8  -4   7   22.90    7.10
  -8  -4  -7   43.30    6.10
   8  -4   7   42.00   10.40
   8   4   7   41.80    5.80
  -8   4  -7   44.10    8.70
   8   4   7   40.50    6.20
   8   4   7   39.40    6.00
  -9  -4  -7   18.70    5.50
  -9  -4  -7   17.20    5.30
  -9  -4  -7    6.50    5.50
  -9   4  -7   13.80    7.80
   9   4   7   16.90    5.30
   9   4   7   17.50    5.30
  -9   4  -7   27.90    5.30
 -10  -4  -7    7.90    5.40
 -10  -4  -7    7.10    5.50
  10  -4   7   -9.30   10.20
 -10  -4  -7   -3.90    5.30
  10  -4   7    4.10    4.50
  10   4   7    3.10    5.60
  10   4   7   -5.80    5.20
  10   4   7    5.40    5.20
  11  -4   7    7.70    5.20
  11  -4   7  -13.00   12.00
 -11  -4  -7    2.10    5.90
 -11  -4  -7   -3.50    6.20
 -11  -4  -7   10.80    6.20
  11   4   7    5.60    6.10
  11   4   7    4.30    6.40
 -11   4  -7   11.10    9.40
  11   4   7   13.40    6.20
  12  -4   7   -2.20   11.80
 -12  -4  -7    6.80    7.20
  12  -4   7   13.70    6.00
 -12  -4  -7   19.00    7.00
 -12  -4  -7    7.50    6.70
  12   4   7    8.40    7.40
  12   4   7    5.50    6.70
 -13  -5   7   -4.00    5.40
 -13  -5   7   13.20    5.40
 -13  -5   7   -9.40    8.10
  13   5  -7   13.50    7.50
 -12  -5   7    6.50    4.70
 -12  -5   7    6.40    8.20
 -12  -5   7   10.10    4.90
  12  -5  -7   15.80   18.70
  12   5  -7   18.70    5.70
  11  -5  -7   11.60   16.70
 -11  -5   7   19.40    7.80
 -11  -5   7   11.30    4.10
 -11  -5   7   13.60    4.50
  11   5  -7    6.50    5.10
  10  -5  -7   19.90   15.60
 -10  -5   7   20.20    4.70
 -10  -5   7   41.50    6.50
 -10  -5   7   29.50    7.60
 -10   5   7   30.30   10.90
  10   5  -7   24.60    5.70
  -9  -5   7   13.70    6.90
  -9  -5   7    5.10    3.20
  -9  -5   7    1.20    3.50
   9  -5  -7    4.70   13.90
  -9   5   7   -0.90   12.70
   9   5  -7    2.00    4.80
  -9   5   7  -11.50   13.70
  -9   5   7   11.50    9.20
   8  -5  -7   17.10   13.20
  -8  -5   7   18.20    6.90
  -8  -5   7    5.40    3.30
  -8   5   7   11.00    8.70
  -8   5   7   12.60   11.20
   8   5  -7    1.90    4.50
  -8   5   7   27.20   13.40
  -7  -5   7   74.69   11.20
  -7  -5   7   64.79    6.70
   7  -5  -7   55.99    9.50
   7  -5  -7   62.69   13.60
   7   5  -7   67.09    8.20
  -7   5   7   67.99   10.40
   6  -5  -7  240.28   20.40
  -6  -5   7  306.37   24.00
  -6   5   7  251.87   24.50
  -6   5   7  244.18   24.10
  -6   5   7  275.67   21.20
   6   5  -7  283.37   19.20
   5  -5  -7   48.30   11.50
  -5  -5   7   67.39   10.70
   5  -5  -7   41.10    7.50
  -5   5   7   53.29   12.00
   4  -5  -7    1.60    9.60
  -4  -5   7   15.60    6.20
  -4   5   7    9.10   10.20
   4   5  -7   13.70    4.60
  -4   5   7    6.70    7.00
  -3  -5   7  145.69   14.60
   3  -5  -7  182.28   13.80
   3  -5  -7  142.59   19.90
  -3   5   7  192.48   14.50
   3   5  -7  153.78   12.60
  -3   5   7  123.99   17.50
  -2  -5   7 1657.83  102.39
   2  -5  -7 1654.93  103.69
   2  -5  -7 1737.73  101.49
  -2   5   7 1516.45  101.59
   2   5  -7 1544.35  101.49
  -2   5   7 1414.76  103.09
  -1  -5   7   15.50    6.60
  -1   5   7   15.30    9.30
  -1   5   7   23.60    5.70
   0  -5   7  123.79    9.90
   0  -5  -7  108.89   10.60
   0  -5   7  157.48   14.60
   0   5  -7  141.89   11.30
  -1  -5  -7  327.77   22.70
   1  -5   7  286.67   22.40
   1  -5   7  356.36   24.70
   1   5   7  337.77   23.00
  -1   5  -7  333.77   23.30
   1   5   7  358.36   26.00
   1   5   7  346.97   23.80
   1   5   7  330.17   23.80
   1   5   7  353.86   23.50
  -2  -5  -7  127.99   10.00
  -2  -5  -7  117.79    9.90
   2   5   7  125.39   14.80
   2   5   7  119.79   11.20
   2   5   7  115.19   11.90
   2   5   7  111.59   12.20
   2   5   7  129.49   10.60
  -3  -5  -7   27.70    4.60
  -3  -5  -7   33.90    5.70
   3  -5   7   25.30    4.90
   3   5   7   24.80    5.00
   3   5   7   33.90    9.40
   3   5   7   27.90    5.40
   3   5   7   29.40    5.60
  -4  -5  -7    1.40    3.80
  -4  -5  -7   -8.60    4.60
   4  -5   7   -6.60    4.60
  -4   5  -7    6.50    6.60
   4   5   7   -6.00    4.50
   4   5   7   -7.90    4.40
   4   5   7   -2.80    4.40
   4   5   7    6.80    8.80
  -5  -5  -7   -5.50    7.90
  -5  -5  -7    0.40    4.10
   5   5   7    1.30    4.40
   5   5   7    3.40   10.20
   5   5   7    8.80    4.70
   5   5   7    2.60    4.60
   6  -5   7   37.60   11.00
  -6  -5  -7   48.30    7.60
  -6  -5  -7   40.10    6.40
   6   5   7   32.40    5.80
   6   5   7   31.30   10.70
  -6   5  -7   45.00    8.00
   6   5   7   34.30    6.10
   6   5   7   33.70    6.00
  -7  -5  -7   27.70    5.70
   7  -5   7   15.60   12.20
  -7  -5  -7   23.70    6.10
  -7  -5  -7   34.20    6.60
   7   5   7   35.80    6.10
   7   5   7   29.40    6.40
   7   5   7   27.80    5.70
  -7   5  -7   38.90    8.30
  -8  -5  -7   84.79   12.20
  -8  -5  -7  100.89   10.90
  -8  -5  -7  113.39   11.30
   8   5   7  103.59   10.90
   8   5   7   92.49   11.20
   8   5   7  112.59   11.20
  -8   5  -7  101.69   14.30
  -9  -5  -7   63.49    8.60
  -9  -5  -7   68.19   10.40
  -9  -5  -7   57.19    9.70
   9  -5   7   61.99   14.50
   9   5   7   59.49    8.40
   9   5   7   80.69   10.30
  10  -5   7   -2.70   14.70
 -10  -5  -7    6.90    6.20
 -10  -5  -7    2.70    6.60
 -10  -5  -7    9.90    7.00
  10   5   7    0.10    6.50
  10   5   7   -0.90    6.60
 -11  -5  -7   -5.80    6.20
 -11  -5  -7   -1.50    6.80
 -11  -5  -7   -0.20    7.20
 -11   5  -7    4.20   14.10
  11   5   7   -5.80    7.10
  11   5   7   -6.80    7.40
  11  -6  -7  -19.00   19.70
 -11  -6   7    6.30    7.80
 -11  -6   7    3.50    4.40
  11   6  -7    8.80    6.90
 -10  -6   7   51.89    6.90
 -10  -6   7   56.29    9.90
  10  -6  -7   25.60   18.80
  10   6  -7   47.70    7.80
   9  -6  -7    1.70   16.90
  -9  -6   7    6.20    6.70
  -9   6   7   15.80   16.80
  -9   6   7   16.90   16.50
   9   6  -7    5.70    5.90
   8  -6  -7   13.30   16.10
  -8  -6   7   15.60    7.20
   8   6  -7    3.50    5.30
  -8   6   7    6.70   15.40
  -7  -6   7   44.30    8.80
   7  -6  -7   31.80   16.30
  -7   6   7   43.20   15.50
   7   6  -7   26.50    6.60
   6  -6  -7   20.30   13.40
  -6  -6   7   33.70    7.90
  -6   6   7    0.00   13.20
   6   6  -7   18.20    5.60
  -5  -6   7   11.90    7.40
   5  -6  -7   36.20   13.10
   5   6  -7    3.90    5.30
  -5   6   7   32.90   13.10
   4  -6  -7   42.50   13.70
   4   6  -7   55.39    8.70
  -4   6   7   64.19   13.70
  -3  -6   7    8.60    7.40
   3  -6  -7   13.60   12.20
  -3   6   7   15.20   11.60
   3   6  -7    1.30    5.80
  -2  -6   7    8.50    6.90
   2  -6  -7    7.20   12.00
   2  -6  -7    7.00    5.50
  -2   6   7    7.80   11.10
   2   6  -7    3.60    5.10
  -1  -6   7   39.30    7.70
  -1   6   7   58.49   12.70
   1   6  -7   43.00    6.70
   0  -6   7   17.90    7.30
   0  -6  -7   21.90    5.10
   0   6   7   36.90   11.30
   0   6  -7   23.60    6.00
   0   6   7   31.60    7.20
  -1  -6  -7  161.48   12.60
  -1  -6  -7  154.48   13.00
  -1   6  -7  186.18   14.90
   1   6   7  190.68   18.70
   1   6   7  169.68   15.10
   1   6   7  145.49   14.60
  -2  -6  -7    5.00    3.80
   2   6   7    5.10    9.50
   2   6   7    2.70   10.00
   2   6   7   -4.40    5.90
  -3  -6  -7   43.60    7.30
   3   6   7   51.09   11.20
   3   6   7   60.19   13.00
  -3   6  -7   50.39    9.70
   3   6   7   52.19    9.00
   3   6   7   51.69    7.70
  -4  -6  -7   92.09   10.70
  -4  -6  -7   78.89   13.30
   4   6   7   76.49    9.60
  -4   6  -7   74.19   12.80
   4   6   7   77.79   11.30
   4   6   7  114.49   16.90
  -5  -6  -7   -3.30    5.80
  -5  -6  -7    2.50    4.90
   5   6   7    2.00    6.50
   5   6   7   -7.10   11.20
  -5   6  -7    3.80    7.50
   5   6   7    2.20    5.80
  -6  -6  -7   31.10    7.40
  -6  -6  -7   39.40    6.60
   6   6   7   37.70    7.30
   6   6   7   53.99   13.70
   6   6   7   33.80    6.90
  -7  -6  -7   67.49    9.90
  -7  -6  -7   76.89    9.40
   7   6   7   81.09   11.70
   7   6   7   59.29    8.80
   7   6   7   86.59   15.50
  -8  -6  -7    3.80    6.00
  -8  -6  -7   -1.30    6.80
   8   6   7   -2.50    6.80
   8   6   7   11.30   14.10
   8   6   7   -5.40    6.80
  -9  -6  -7   19.10    7.20
   9  -6   7    7.10   16.80
  -9  -6  -7   27.50    8.20
  -9  -6  -7   23.00    8.30
   9   6   7   23.60    8.10
   9   6   7   10.90   15.00
   9   6   7   31.80    8.40
 -10  -6  -7   25.50    7.90
 -10  -6  -7   36.50    8.90
 -10  -6  -7   51.49    9.70
  10   6   7   30.50    8.80
  10   6   7   34.50    9.80
  10   6   7   21.40   17.00
   9  -7  -7   15.70   21.90
  -9  -7   7   41.10    9.60
   9   7  -7   33.60    8.00
  -9   7   7   12.20   18.60
  -8  -7   7    5.80    7.90
   8  -7  -7   -6.40   18.60
   8   7  -7    3.60    6.20
  -8   7   7   18.90   17.90
   7  -7  -7   25.40   18.80
  -7  -7   7    4.90    8.30
  -7   7   7    6.80   17.60
   7   7  -7   -0.70    6.10
   6  -7  -7   -4.90   16.20
  -6  -7   7    3.00    8.90
  -6   7   7  -27.60   16.80
   6   7  -7    7.40    6.30
  -5  -7   7   18.80    9.10
   5  -7  -7   20.90   15.90
  -5   7   7    6.90   16.40
   5   7  -7    8.90    6.50
  -4  -7   7  130.99   15.70
   4  -7  -7   83.79   18.60
  -4   7   7   92.09   19.50
   4   7  -7   92.49   12.30
  -3  -7   7   19.10    8.90
   3  -7  -7    2.30   15.70
  -3   7   7   37.40   16.30
   3   7  -7   25.80    7.10
  -2  -7   7   85.49   11.60
   2  -7  -7   91.89   19.60
   2   7  -7   83.49   11.80
  -2   7   7   81.09   16.90
   1  -7  -7  192.58   30.40
  -1  -7   7  164.78   23.40
   1   7  -7  176.48   16.30
   1   7  -7  168.98   22.70
  -1   7   7  182.18   23.80
   0  -7   7   78.59   12.00
   0   7   7  105.29   17.90
   0   7  -7  113.39   13.60
  -1  -7  -7   -0.20    4.40
   1   7   7    7.50   14.40
  -2  -7  -7   -5.80    5.00
   2   7   7    7.80   14.00
   2   7   7   -9.50    6.80
  -3  -7  -7   -9.30    4.50
   3   7   7  -15.10   14.50
   3   7   7  -14.40    7.00
  -4  -7  -7   -2.20    5.10
   4   7   7    9.70   14.00
  -4   7  -7    0.90    8.80
   4   7   7    9.10    7.60
  -5  -7  -7   -3.60    5.70
   5   7   7   -2.10    6.90
  -5   7  -7    4.40   12.30
   5   7   7   13.40   14.80
  -6  -7  -7   42.90    7.10
  -6  -7  -7   29.90    8.20
  -6   7  -7   27.60   13.10
   6   7   7   29.10    8.00
   6   7   7   47.60   16.00
  -7  -7  -7   -4.30    7.50
  -7  -7  -7    0.50    6.50
   7   7   7   -4.20    7.80
   7   7   7   20.30   16.50
  -7   7  -7  -14.10   12.50
  -8  -7  -7    4.00    8.80
  -8  -7  -7   -7.90    6.90
   8   7   7    8.50    8.40
   8   7   7    1.80   17.40
  -6  -8   7   12.00    9.80
   6  -8  -7  -12.60   21.20
   6   8  -7    2.90    7.90
  -6   8   7  -14.10   21.30
  -5  -8   7   38.30   11.30
   5  -8  -7   11.50   19.60
  -5   8   7   19.10   20.50
   5   8  -7   21.80    8.10
  -4  -8   7   45.80   11.50
   4  -8  -7   35.90   19.20
  -4   8   7   16.00   19.50
   4   8  -7   40.90    8.80
  -3  -8   7   20.40   11.30
   3  -8  -7   -3.40   19.40
   3   8  -7   26.70    8.30
   3   8  -7   36.00   21.30
  -3   8   7    3.60   18.90
   2  -8  -7   11.00   20.70
  -2  -8   7    8.60   10.90
   2   8  -7    7.00    8.80
  -2   8   7   11.10   18.10
   1  -8  -7   85.19   22.80
  -1   8   7   64.69   19.30
   0  -8   7   17.60   11.10
   0   8   7    5.50   17.00
   0   8  -7   48.00   11.80
   1   8   7    0.50   16.70
  -2  -8  -7   -3.00    5.70
   2   8   7    5.20   17.50
  -3  -8  -7    5.10    6.90
   3   8   7    5.60   18.40
   3   8   7   14.60    9.30
  -4  -8  -7   -8.20    6.20
   4   8   7   -6.60    8.90
   4   8   7   -7.00   18.80
  -5  -8  -7   -4.90    6.80
   5   8   7    7.50    9.40
   5   8   7    7.40   19.20
  15   0  -8   19.60    8.50
 -15   0   8   31.30   10.30
 -15   0   8   23.20    9.40
  14   0  -8   40.70    8.70
 -14   0   8   48.90   13.00
 -14   0   8   42.30    9.10
  13   0  -8   18.40    7.10
 -13   0   8   19.30    7.80
 -13   0   8   17.80    7.60
  12   0  -8    1.20    6.00
 -12   0   8   -5.10    6.70
 -12   0   8   -4.00    6.30
 -11   0   8   -3.70    6.10
 -11   0   8   -3.00    6.20
  11   0  -8    3.40    5.70
  10   0  -8  232.48   20.50
  10   0  -8  230.48   17.80
 -10   0   8  213.68   17.70
 -10   0   8  212.58   17.70
  -9   0   8  123.99   15.20
   9   0  -8  141.99   14.80
  -9   0   8  135.99   13.00
   9   0  -8  157.18   13.00
  -9   0   8  140.99   12.90
   8   0  -8    7.80    4.60
   8   0  -8   11.30    5.60
  -8   0   8    8.80    5.20
  -8   0   8    5.10    5.20
  -8   0   8    3.30    5.00
   8   0  -8   -0.30    5.90
  -7   0   8  937.41   58.69
   7   0  -8 1015.60   58.59
   7   0  -8  853.41   58.69
   7   0  -8  870.81   58.69
  -7   0   8  815.32   58.59
  -7   0   8  934.41   58.69
  -6   0   8  825.62   49.99
   6   0  -8  721.03   49.80
   6   0  -8  755.32   49.90
   6   0  -8  831.82   49.70
  -6   0   8  742.03   49.70
  -6   0   8  700.33   49.70
  -6   0   8  796.22   49.90
  -5   0   8 2402.26  149.69
   5   0  -8 2378.36  149.69
  -5   0   8 2374.66  149.69
   5   0  -8 2262.87  149.69
   4   0  -8  951.20   61.59
  -4   0   8  962.40   61.69
  -4   0   8  947.11   61.69
   4   0  -8  975.20   61.59
  -3   0   8  135.09   10.50
  -3   0   8  133.69   10.50
   3   0  -8  137.79   10.30
   3   0  -8  140.19   10.50
   2   0  -8    2.50    2.50
   2   0  -8    1.20    2.50
  -2   0   8    1.00    2.70
  -2   0   8    2.70    2.90
  -1   0   8   31.90    4.80
  -1   0   8   39.30    4.70
   1   0  -8   35.20    4.70
   1   0  -8   32.30    4.50
   0   0   8   36.10    4.30
   0   0   8   35.20    4.50
   0   0   8   42.10    4.90
   0   0   8   42.50    4.70
   0   0  -8   49.30    4.50
  -1   0  -8 1065.39   65.59
  -1   0  -8 1036.90   65.49
   1   0   8  995.90   65.69
   1   0   8 1027.30   65.49
   1   0   8  990.70   65.59
   1   0   8  979.00   65.59
   1   0   8 1106.19   65.69
  -2   0  -8   98.89    7.90
   2   0   8  111.69    7.80
  -2   0  -8  100.49    7.50
   2   0   8  104.69    7.40
   2   0   8   96.19    7.80
   2   0   8  102.39    7.40
  -2   0  -8  110.09    7.50
   2   0   8   92.49    7.60
  -3   0  -8   40.30    5.00
   3   0   8   48.00    4.30
  -3   0  -8   42.70    5.00
   3   0   8   46.70    4.70
   3   0   8   44.10    4.70
   3   0   8   49.40    4.40
   3   0   8   49.90    4.80
  -3   0  -8   48.70    4.40
  -3   0  -8   41.00    4.80
  -4   0  -8  883.81   57.29
  -4   0  -8  913.21   57.09
   4   0   8  776.52   56.89
   4   0   8  973.00   56.99
   4   0   8  894.51   57.09
   4   0   8  930.01   57.19
   4   0   8  942.11   56.99
  -4   0  -8  846.82   57.09
   4   0   8  910.31   57.09
  -4   0  -8  858.51   56.99
  -5   0  -8  160.98   12.00
   5   0   8  170.68   12.10
   5   0   8  153.38   11.90
   5   0   8  165.68   11.90
   5   0   8  176.18   12.30
  -5   0  -8  171.48   12.10
   5   0   8  176.98   12.20
  -5   0  -8  176.38   12.40
  -5   0  -8  168.58   12.10
   5   0   8  184.58   12.00
   6   0   8  579.84   37.50
  -6   0  -8  593.74   37.80
   6   0   8  576.54   37.70
   6   0   8  607.24   37.40
   6   0   8  595.14   37.50
   6   0   8  581.24   37.50
  -6   0  -8  560.64   37.40
  -6   0  -8  526.75   37.50
   7   0   8   63.99    6.50
   7   0   8   58.59    6.70
   7   0   8   58.59    6.50
  -7   0  -8   54.69    7.20
   7   0   8   69.99    7.10
  -7   0  -8   60.99    6.30
  -7   0  -8   62.69    7.10
   7   0   8   58.09    7.90
   7   0   8   54.09    6.70
  -7   0  -8   59.99    6.50
   8   0   8    4.30    4.20
  -8   0  -8   -4.10    3.50
   8   0   8   -2.30    3.30
  -8   0  -8   -3.30    3.20
   8   0   8   -4.30    3.30
   8   0   8    0.00    3.90
  -8   0  -8   -2.30    3.90
   8   0   8    0.60    3.90
   9   0   8   50.69    7.40
   9   0   8   49.80    6.80
  -9   0  -8   50.09    7.10
  -9   0  -8   54.49    6.90
   9   0   8   57.49    7.90
   9   0   8   57.29    8.70
   9   0   8   54.79    7.70
  -9   0  -8   56.49    7.40
  10   0   8   10.20    7.00
 -10   0  -8    0.90    4.20
 -10   0  -8   -0.60    5.20
  10   0   8    4.50    4.90
 -10   0  -8    0.20    4.60
 -11   0  -8   31.50    6.80
  11   0   8   49.30    7.00
  11   0   8   57.29    7.30
 -11   0  -8   71.49   10.70
 -11   0  -8   39.40    6.20
  11   0   8   43.30    7.40
 -12   0  -8    7.70    8.00
  12   0   8    0.70    5.60
 -12   0  -8    1.50    5.10
  12   0   8   -5.60    6.30
  12   0   8   -0.50    5.80
  13   0   8   21.00    6.60
  13   0   8    9.90    6.90
 -13   0  -8   13.80    6.70
  13   0   8   10.60    7.80
 -13   0  -8    2.50    8.90
 -14   0  -8    2.10    9.10
  14   0   8   18.10    8.20
  14   0   8   10.30    8.50
  14   0   8    8.20    7.50
 -14   0  -8    5.50    7.60
  15  -1  -8   -5.70   10.00
 -15  -1   8    5.70   10.00
 -15  -1   8    6.10    7.80
 -15  -1   8    4.10    9.10
  15   1  -8  -15.70    7.80
 -15   1   8   -7.30    9.50
  14  -1  -8   12.50    9.80
 -14  -1   8   24.30    8.50
 -14  -1   8   22.80    7.50
 -14  -1   8   19.70    7.70
 -14   1   8   27.90    9.90
  14   1  -8   31.60    8.10
 -14   1   8   38.70   10.50
 -13  -1   8    7.80    7.20
 -13  -1   8   13.30    6.80
  13  -1  -8   21.10    9.20
  13   1  -8   30.40    7.00
 -13   1   8   24.90    8.50
 -13   1   8   14.80    9.20
 -12  -1   8   18.00    6.30
  12  -1  -8   18.70   14.70
 -12  -1   8   15.20    6.40
 -12  -1   8   14.70    6.50
  12  -1  -8    4.60    7.80
  12   1  -8   20.00    5.30
 -12   1   8   20.70    8.70
 -12   1   8   30.50    8.50
 -11  -1   8    5.40    5.50
 -11  -1   8    4.20    5.30
  11  -1  -8   11.60   11.20
 -11  -1   8   -0.60    5.60
 -11   1   8   -7.70    7.00
 -11   1   8    5.80    6.50
 -11   1   8    0.40   11.30
  11   1  -8    3.40    4.60
 -10  -1   8  207.68   18.30
 -10  -1   8  231.58   18.30
  10  -1  -8  261.07   21.30
  10  -1  -8  241.38   21.60
 -10  -1   8  238.58   19.00
  10   1  -8  280.17   17.90
 -10   1   8  214.68   19.20
 -10   1   8  252.37   19.60
   9  -1  -8   25.60    7.40
   9  -1  -8   15.80    7.10
   9  -1  -8   22.70    7.10
  -9  -1   8    7.60    5.30
  -9  -1   8   16.40    5.60
  -9  -1   8   15.10    5.80
  -9  -1   8   13.40    5.40
  -9   1   8   17.50    6.90
   9   1  -8   25.30    4.70
   9   1  -8   12.10    6.90
  -9   1   8   17.20    6.20
  -8  -1   8  149.39   11.80
   8  -1  -8  148.39   13.90
   8  -1  -8  120.79   13.00
   8  -1  -8  133.59   13.40
  -8  -1   8  139.09   12.40
  -8  -1   8  145.29   12.00
  -8  -1   8  154.58   12.70
   8   1  -8  155.18   11.20
  -8   1   8  126.29   13.00
   8   1  -8  118.79   12.40
  -8   1   8  132.89   13.00
   7  -1  -8   15.60    5.30
   7  -1  -8   32.00    6.10
  -7  -1   8   16.10    5.00
  -7  -1   8   15.20    4.70
   7  -1  -8   22.10    5.40
  -7  -1   8   24.30    4.40
  -7   1   8   24.70    5.60
   7   1  -8   20.20    4.70
   7   1  -8   23.60    5.10
   7   1  -8   31.30    5.40
  -7   1   8   18.40    6.00
  -7   1   8   32.60    5.90
   6  -1  -8  129.89   11.60
   6  -1  -8  120.39   10.40
  -6  -1   8  114.89   10.80
  -6  -1   8  114.69   10.30
   6  -1  -8  114.19   10.20
  -6  -1   8  108.79    9.90
  -6   1   8  128.79   10.80
  -6   1   8  101.59   11.10
   6   1  -8  111.19   10.20
  -6   1   8  126.19   10.70
   6   1  -8   92.99   10.00
   5  -1  -8  527.15   36.30
   5  -1  -8  558.04   36.50
  -5  -1   8  566.14   36.30
  -5  -1   8  556.14   36.30
  -5  -1   8  538.95   36.60
   5  -1  -8  608.64   36.90
  -5   1   8  574.44   36.70
  -5   1   8  560.54   36.70
   5   1  -8  536.05   36.30
  -5   1   8  532.85   36.80
   5   1  -8  541.65   36.30
  -4  -1   8  701.23   46.10
   4  -1  -8  695.13   46.30
   4  -1  -8  700.73   46.30
  -4  -1   8  718.13   46.10
   4  -1  -8  792.32   46.70
   4   1  -8  732.33   46.20
   4   1  -8  736.53   46.20
  -4   1   8  718.53   46.50
  -4   1   8  630.04   46.30
  -4   1   8  720.43   46.50
  -3  -1   8 1733.93  107.09
   3  -1  -8 1609.04  107.09
  -3  -1   8 1717.63  107.09
   3  -1  -8 1574.94  107.49
  -3   1   8 1648.14  107.19
   3   1  -8 1789.92  107.19
  -3   1   8 1595.54  107.19
   3   1  -8 1791.92  107.09
   2  -1  -8   37.20    4.90
  -2  -1   8   39.50    4.30
  -2  -1   8   35.00    4.20
  -2   1   8   38.20    5.50
  -2   1   8   37.00    4.50
   2   1  -8   28.10    4.70
   2   1  -8   31.80    4.90
  -1  -1   8  591.44   38.20
   1  -1  -8  621.44   38.20
  -1  -1   8  581.14   38.10
  -1   1   8  614.94   38.30
   1   1  -8  591.74   38.10
  -1   1   8  546.95   38.00
   1   1  -8  594.74   38.10
   0  -1   8 6040.40  373.66
   0  -1  -8 6001.10  373.76
   0  -1  -8 5855.31  373.66
   0  -1   8 5850.41  373.66
   0   1   8 5700.83  373.76
   0   1   8 6033.60  374.36
   0   1   8 5575.64  373.76
   0   1  -8 6093.69  373.56
   0   1  -8 6041.00  373.56
   1  -1   8  202.88   14.70
   1  -1   8  223.48   14.60
   1  -1   8  230.38   14.50
   1  -1   8  200.68   14.80
  -1  -1  -8  244.08   14.90
  -1  -1  -8  220.08   14.90
  -1  -1  -8  220.08   14.80
   1   1   8  226.08   14.80
   1   1   8  242.08   14.70
  -1   1  -8  201.88   14.60
  -1   1  -8  219.78   14.60
   1   1   8  205.78   14.90
   1   1   8  203.48   15.00
   2  -1   8   70.19    6.40
   2  -1   8   59.99    5.40
   2  -1   8   60.49    5.20
   2  -1   8   66.29    5.10
  -2  -1  -8   64.29    5.60
  -2  -1  -8   66.79    6.00
  -2  -1  -8   70.79    5.20
   2  -1   8   60.79    5.50
   2  -1   8   66.19    5.70
  -2  -1  -8   61.19    5.50
  -2  -1  -8   65.89    5.40
   2   1   8   59.09    5.30
   2   1   8   56.59    5.90
   2   1   8   72.19    5.50
   2   1   8   57.69    5.70
  -2   1  -8   63.59    5.20
  -2   1  -8   55.59    5.20
  -3  -1  -8  274.47   18.10
  -3  -1  -8  283.17   17.90
  -3  -1  -8  259.67   18.10
   3  -1   8  282.37   18.20
   3  -1   8  276.17   17.70
   3  -1   8  252.87   18.40
  -3  -1  -8  259.67   17.70
   3  -1   8  268.67   17.90
  -3  -1  -8  263.67   18.10
   3  -1   8  259.07   17.90
   3  -1   8  284.97   17.70
   3   1   8  276.47   17.80
  -3   1  -8  290.47   18.00
   3   1   8  264.97   17.80
  -3   1  -8  267.27   18.00
   3   1   8  266.57   18.00
   3   1   8  265.87   18.10
   3   1   8  259.27   18.00
   4  -1   8  449.46   28.60
   4  -1   8  432.76   28.50
  -4  -1  -8  420.06   28.40
   4  -1   8  440.46   28.30
  -4  -1  -8  440.06   28.70
  -4  -1  -8  426.36   28.70
  -4  -1  -8  434.16   28.70
   4  -1   8  446.06   28.30
   4  -1   8  458.45   28.70
  -4   1  -8  424.16   28.50
   4   1   8  428.66   28.70
  -4   1  -8  450.75   28.60
   4   1   8  437.06   28.70
   4   1   8  435.56   28.70
   4   1   8  441.96   28.50
   4   1   8  458.05   28.50
  -5  -1  -8  143.09   10.60
   5  -1   8  140.39   10.40
   5  -1   8  143.49   10.40
   5  -1   8  133.99   10.10
   5  -1   8  129.89   10.10
  -5  -1  -8  133.19   10.40
   5  -1   8  151.48   10.20
   5  -1   8  144.99   10.50
  -5  -1  -8  141.29   10.20
  -5  -1  -8  141.09   10.50
   5   1   8  144.49   10.70
  -5   1  -8  137.89   10.40
   5   1   8  143.19   10.90
  -5   1  -8  137.09   10.20
   5   1   8  147.39   10.80
   5   1   8  149.29   10.60
   5   1   8  152.28   10.30
   5   1   8  144.09   10.30
   6  -1   8  155.38   11.20
   6  -1   8  131.69   10.80
  -6  -1  -8  146.49   11.00
   6  -1   8  138.39   10.90
  -6  -1  -8  154.78   11.20
   6  -1   8  148.99   10.90
  -6  -1  -8  139.29   10.90
   6  -1   8  152.88   10.90
   6  -1   8  139.89   10.70
  -6  -1  -8  148.29   11.00
   6   1   8  156.98   11.50
   6   1   8  149.88   11.10
   6   1   8  140.19   11.90
  -6   1  -8  135.59   10.70
  -6   1  -8  160.88   10.90
   6   1   8  145.29   11.10
   6   1   8  152.78   10.80
   6   1   8  144.59   10.90
   7  -1   8  118.69    9.50
   7  -1   8  121.19    9.80
   7  -1   8  113.69    9.70
  -7  -1  -8  119.49    9.50
   7  -1   8   96.09   10.40
   7  -1   8  110.89    9.70
  -7  -1  -8  125.59    9.60
  -7  -1  -8  121.69    9.90
   7  -1   8  123.39    9.60
   7   1   8  111.29    9.60
  -7   1  -8  112.89    9.40
   7   1   8  125.29    9.50
  -7   1  -8  112.39    9.20
   7   1   8  121.59    9.70
  -7   1  -8  122.39   10.20
   7   1   8  132.59   10.50
   7   1   8  111.79    9.80
  -8  -1  -8   91.39    9.90
   8  -1   8  101.19    9.70
  -8  -1  -8  114.49    9.40
   8  -1   8  102.69   10.10
   8  -1   8  101.19   10.30
   8  -1   8  114.59    9.30
  -8  -1  -8  104.89    9.20
   8  -1   8  111.89    9.30
   8   1   8  115.89    9.60
  -8   1  -8  107.29    8.90
   8   1   8  110.59   10.40
  -8   1  -8   88.29   10.10
  -8   1  -8  102.79    9.20
   8   1   8  105.99    9.80
   8   1   8  112.09    9.50
  -9  -1  -8  557.24   37.80
  -9  -1  -8  604.14   38.30
  -9  -1  -8  579.94   38.00
   9  -1   8  578.34   37.90
   9  -1   8  501.05   38.60
   9  -1   8  487.25   38.30
   9  -1   8  574.74   38.30
   9   1   8  629.94   38.70
  -9   1  -8  554.64   37.70
   9   1   8  568.74   38.40
  -9   1  -8  657.03   38.60
   9   1   8  590.74   38.00
   9   1   8  563.54   38.40
  -9   1  -8  596.64   38.40
  10  -1   8  107.59   10.20
  10  -1   8  110.59   14.10
  10  -1   8  110.99   10.40
  10  -1   8   88.29   13.80
 -10  -1  -8  104.29   10.60
 -10  -1  -8   92.19   10.00
 -10  -1  -8  108.79   12.00
 -10   1  -8  104.59   14.00
 -10   1  -8  101.09   11.10
  10   1   8  100.39   12.30
  10   1   8  124.99   10.80
  10   1   8  107.19   12.10
  10   1   8  103.19   10.40
 -10   1  -8   93.19    9.90
 -10   1  -8   97.49   10.00
  11  -1   8  228.58   17.90
  11  -1   8  230.68   18.10
 -11  -1  -8  248.48   18.10
 -11  -1  -8  215.28   17.60
 -11  -1  -8  248.88   19.40
  11  -1   8  227.28   18.70
 -11   1  -8  228.78   20.00
  11   1   8  247.28   18.40
  11   1   8  245.78   17.90
  11   1   8  237.48   16.80
 -11   1  -8  230.08   19.30
 -11   1  -8  227.58   17.60
 -11   1  -8  222.78   18.60
  11   1   8  250.97   19.50
 -12  -1  -8    9.80    5.60
  12  -1   8    9.50    5.80
  12  -1   8   11.70    6.10
 -12  -1  -8    8.60    6.40
  12  -1   8   -0.80    6.60
 -12  -1  -8    3.30    7.40
 -12   1  -8   11.20    8.20
  12   1   8   10.70    6.00
  12   1   8    1.10    7.00
 -12   1  -8   10.00    5.80
  12   1   8   22.30    6.30
  13  -1   8    2.40    6.30
 -13  -1  -8   -9.60    7.80
 -13  -1  -8   -5.30    6.20
  13  -1   8    1.10    8.40
  13  -1   8    3.60    6.20
  13   1   8   11.20    8.20
 -13   1  -8   -2.10    7.40
  13   1   8    8.20    6.50
  13   1   8    5.20    6.90
 -13   1  -8   10.30    6.70
  13   1   8   -4.60    7.90
 -14  -1  -8   53.29    9.20
 -14  -1  -8   46.00   11.10
  14  -1   8   62.09    9.50
  14  -1   8   39.40   10.10
 -14   1  -8   57.49   13.30
  14   1   8   84.69   13.30
  14   1   8   50.79   11.00
  14   1   8   44.20    9.60
 -14   1  -8   61.79    9.50
  15  -2  -8   26.10   13.60
 -15  -2   8   35.10   11.00
 -15  -2   8   34.30    8.20
 -15  -2   8   29.20    8.60
  15   2  -8   42.30    8.80
 -15   2   8   20.20   11.90
 -14  -2   8   12.90    7.50
 -14  -2   8   16.00    6.70
  14  -2  -8   12.50   11.80
 -14  -2   8    3.60    9.00
  14   2  -8   20.20    7.20
 -14   2   8    8.90   10.50
 -13  -2   8   21.10    6.40
  13  -2  -8    2.10   11.40
 -13  -2   8   11.90    6.40
 -13  -2   8   19.30    8.00
 -13   2   8    8.30    9.10
  13   2  -8   25.00    6.20
 -13   2   8   27.20   11.90
 -12  -2   8    0.70    5.20
  12  -2  -8   -6.80   10.50
 -12  -2   8    7.90    6.60
 -12  -2   8   -0.80    5.30
 -12   2   8    9.50    8.80
  12   2  -8    2.70    4.70
 -12   2   8    8.90    9.40
 -11  -2   8   -3.10    5.10
 -11  -2   8   -4.10    5.90
  11  -2  -8    9.30   10.70
 -11  -2   8   -6.90    4.70
  11  -2  -8    2.50    9.40
 -11   2   8    1.00    7.50
 -11   2   8   -0.10    7.30
  11   2  -8    6.00    4.40
 -11   2   8    1.70   11.10
 -10  -2   8  161.48   14.80
  10  -2  -8  188.18   19.90
 -10  -2   8  219.48   16.70
  10  -2  -8  177.58   18.30
  10   2  -8  212.38   14.80
[truncated: 347,840 more chars]
