# Supplementary material
Source: publisher figshare collection journal article supplement (https://acs.figshare.com/ndownloader/files/8698681)
Supplement: Supplementary file 1 [file 8698681 › 5b_0m_af.cif]

 
data_BS8_0m_a
 
_audit_creation_method            'SHELXL-2014/7'
_shelx_SHELXL_version_number      '2014/7'
_chemical_name_systematic         ?
_chemical_name_common             ?
_chemical_melting_point           ?
_chemical_formula_moiety          'C24 H19 N3 O2' 
_chemical_formula_sum
 'C24 H19 N3 O2' 
_chemical_formula_weight          381.42

loop_
 _atom_type_symbol
 _atom_type_description
 _atom_type_scat_dispersion_real
 _atom_type_scat_dispersion_imag
 _atom_type_scat_source
 'C'  'C'   0.0033   0.0016
 'International Tables Vol C Tables 4.2.6.8 and 6.1.1.4'
 'H'  'H'   0.0000   0.0000
 'International Tables Vol C Tables 4.2.6.8 and 6.1.1.4'
 'N'  'N'   0.0061   0.0033
 'International Tables Vol C Tables 4.2.6.8 and 6.1.1.4'
 'O'  'O'   0.0106   0.0060
 'International Tables Vol C Tables 4.2.6.8 and 6.1.1.4'
 
_space_group_crystal_system       monoclinic
_space_group_IT_number            14
_space_group_name_H-M_alt         'P 21/n'
_space_group_name_Hall            '-P 2yn'
 
_shelx_space_group_comment
;
The symmetry employed for this shelxl refinement is uniquely defined
by the following loop, which should always be used as a source of
symmetry information in preference to the above space-group names.
They are only intended as comments.
;
 
loop_
 _space_group_symop_operation_xyz
 'x, y, z'
 '-x+1/2, y+1/2, -z+1/2'
 '-x, -y, -z'
 'x-1/2, -y-1/2, z-1/2'
 
_cell_length_a                    14.0790(7)
_cell_length_b                    9.5407(4)
_cell_length_c                    15.4359(7)
_cell_angle_alpha                 90
_cell_angle_beta                  111.7640(10)
_cell_angle_gamma                 90
_cell_volume                      1925.61(15)
_cell_formula_units_Z             4
_cell_measurement_temperature     294(2)
_cell_measurement_reflns_used     9977
_cell_measurement_theta_min       2.71
_cell_measurement_theta_max       28.25
 
_exptl_crystal_description        block
_exptl_crystal_colour             colorless
_exptl_crystal_density_meas       ?
_exptl_crystal_density_method     ?
_exptl_crystal_density_diffrn     1.316          
_exptl_crystal_F_000              800
_exptl_transmission_factor_min    ?
_exptl_transmission_factor_max    ?
_exptl_crystal_size_max           0.400
_exptl_crystal_size_mid           0.300
_exptl_crystal_size_min           0.220
_exptl_absorpt_coefficient_mu     0.086
_shelx_estimated_absorpt_T_min    0.967
_shelx_estimated_absorpt_T_max    0.981
_exptl_absorpt_correction_type    multi-scan
_exptl_absorpt_correction_T_min   0.94
_exptl_absorpt_correction_T_max   0.97
_exptl_absorpt_process_details    'SADABS; Bruker,2016'

_diffrn_ambient_temperature       294(2)
_diffrn_radiation_wavelength      0.71073
_diffrn_radiation_type            MoK\a
_diffrn_measurement_device_type   'Bruker D8 QUEST PHOTON-100'
_diffrn_measurement_method       '\w and \f'
_diffrn_detector_area_resol_mean  ?
_diffrn_reflns_number             47362
_diffrn_reflns_av_unetI/netI      0.0198
_diffrn_reflns_av_R_equivalents   0.0323
_diffrn_reflns_limit_h_min        -18
_diffrn_reflns_limit_h_max        18
_diffrn_reflns_limit_k_min        -12
_diffrn_reflns_limit_k_max        12
_diffrn_reflns_limit_l_min        -20
_diffrn_reflns_limit_l_max        20
_diffrn_reflns_theta_min          2.713
_diffrn_reflns_theta_max          28.356
_diffrn_reflns_theta_full         25.242
_diffrn_measured_fraction_theta_max   0.992
_diffrn_measured_fraction_theta_full  0.993
_diffrn_reflns_Laue_measured_fraction_max    0.992
_diffrn_reflns_Laue_measured_fraction_full   0.993
_diffrn_reflns_point_group_measured_fraction_max   0.992
_diffrn_reflns_point_group_measured_fraction_full  0.993
_reflns_number_total              4782
_reflns_number_gt                 3802
_reflns_threshold_expression      'I > 2\s(I)'
_reflns_Friedel_coverage          0.000
_reflns_Friedel_fraction_max      .
_reflns_Friedel_fraction_full     .
 
_reflns_special_details
;
 Reflections were merged by SHELXL according to the crystal
 class for the calculation of statistics and refinement.
 
 _reflns_Friedel_fraction is defined as the number of unique
 Friedel pairs measured divided by the number that would be
 possible theoretically, ignoring centric projections and
 systematic absences.
;
 
_computing_data_collection       '<i>APEX3</i> (Bruker, 2016)'
_computing_cell_refinement       '<i>SAINT</i> (Bruker, 2016)'
_computing_data_reduction        'Bruker SAINT'
_computing_structure_solution    '<i>SHELXT</i> (Sheldrick, 2015)'
_computing_structure_refinement  '<i>SHELXL2014</i> (Sheldrick, 2015)'
_computing_molecular_graphics    'Bruker SHELXTL'
_computing_publication_material  'Bruker SHELXTL'

_refine_ls_structure_factor_coef  Fsqd
_refine_ls_matrix_type            full
_refine_ls_weighting_scheme       calc
_refine_ls_weighting_details
'w=1/[\s^2^(Fo^2^)+(0.0708P)^2^+0.7126P] where P=(Fo^2^+2Fc^2^)/3'
_atom_sites_solution_primary      ?
_atom_sites_solution_secondary    ?
_atom_sites_solution_hydrogens    geom
_refine_ls_hydrogen_treatment     constr
_refine_ls_extinction_method      none
_refine_ls_extinction_coef        .
_refine_ls_number_reflns          4782
_refine_ls_number_parameters      263
_refine_ls_number_restraints      0
_refine_ls_R_factor_all           0.0726
_refine_ls_R_factor_gt            0.0569
_refine_ls_wR_factor_ref          0.1532
_refine_ls_wR_factor_gt           0.1429
_refine_ls_goodness_of_fit_ref    1.049
_refine_ls_restrained_S_all       1.049
_refine_ls_shift/su_max           0.000
_refine_ls_shift/su_mean          0.000
 
loop_
 _atom_site_label
 _atom_site_type_symbol
 _atom_site_fract_x
 _atom_site_fract_y
 _atom_site_fract_z
 _atom_site_U_iso_or_equiv
 _atom_site_adp_type
 _atom_site_occupancy
 _atom_site_site_symmetry_order  
 _atom_site_calc_flag
 _atom_site_refinement_flags_posn
 _atom_site_refinement_flags_adp
 _atom_site_refinement_flags_occupancy
 _atom_site_disorder_assembly
 _atom_site_disorder_group
C1 C 0.57601(12) 0.42600(15) 0.41525(10) 0.0367(3) Uani 1 1 d . . . . .
C2 C 0.52665(12) 0.51778(15) 0.34479(10) 0.0362(3) Uani 1 1 d . . . . .
C3 C 0.33983(14) 0.5548(2) 0.25588(12) 0.0495(4) Uani 1 1 d . . . . .
H3 H 0.3478 0.6240 0.2167 0.059 Uiso 1 1 calc R U . . .
C4 C 0.24538(15) 0.5127(2) 0.24871(16) 0.0604(5) Uani 1 1 d . . . . .
H4 H 0.1878 0.5521 0.2036 0.072 Uiso 1 1 calc R U . . .
C5 C 0.23409(14) 0.4089(2) 0.30952(16) 0.0585(5) Uani 1 1 d . . . . .
H5 H 0.1690 0.3823 0.3056 0.070 Uiso 1 1 calc R U . . .
C6 C 0.31732(14) 0.34797(19) 0.37340(13) 0.0498(4) Uani 1 1 d . . . . .
H6 H 0.3096 0.2788 0.4127 0.060 Uiso 1 1 calc R U . . .
C7 C 0.41573(12) 0.38949(16) 0.38026(11) 0.0393(3) Uani 1 1 d . . . . .
C8 C 0.68657(12) 0.40709(16) 0.46555(11) 0.0405(3) Uani 1 1 d . . . . .
C9 C 0.76012(14) 0.4898(2) 0.45045(14) 0.0527(4) Uani 1 1 d . . . . .
H9 H 0.7398 0.5590 0.4048 0.063 Uiso 1 1 calc R U . . .
C10 C 0.86218(15) 0.4710(3) 0.50184(17) 0.0670(6) Uani 1 1 d . . . . .
H10 H 0.9101 0.5282 0.4910 0.080 Uiso 1 1 calc R U . . .
C11 C 0.89417(16) 0.3699(2) 0.56848(17) 0.0667(6) Uani 1 1 d . . . . .
H11 H 0.9635 0.3581 0.6031 0.080 Uiso 1 1 calc R U . . .
C12 C 0.82392(17) 0.2859(2) 0.58432(16) 0.0676(6) Uani 1 1 d . . . . .
H12 H 0.8460 0.2166 0.6298 0.081 Uiso 1 1 calc R U . . .
C13 C 0.72090(15) 0.3020(2) 0.53419(14) 0.0566(5) Uani 1 1 d . . . . .
H13 H 0.6740 0.2435 0.5456 0.068 Uiso 1 1 calc R U . . .
C14 C 0.59496(12) 0.60328(16) 0.22464(11) 0.0391(3) Uani 1 1 d . . . . .
C15 C 0.62195(14) 0.72990(17) 0.20038(11) 0.0448(4) Uani 1 1 d . . . . .
H15 H 0.6482 0.7461 0.1542 0.054 Uiso 1 1 calc R U . . .
C16 C 0.60274(13) 0.83306(16) 0.25832(11) 0.0403(3) Uani 1 1 d . . . . .
C17 C 0.61283(16) 0.97948(18) 0.26496(13) 0.0522(4) Uani 1 1 d . . . . .
H17 H 0.6388 1.0286 0.2266 0.063 Uiso 1 1 calc R U . . .
C18 C 0.58385(17) 1.04874(19) 0.32873(14) 0.0569(5) Uani 1 1 d . . . . .
H18 H 0.5895 1.1458 0.3330 0.068 Uiso 1 1 calc R U . . .
C19 C 0.54591(15) 0.97611(19) 0.38745(13) 0.0525(4) Uani 1 1 d . . . . .
H19 H 0.5270 1.0263 0.4301 0.063 Uiso 1 1 calc R U . . .
C20 C 0.53564(13) 0.83243(17) 0.38417(11) 0.0436(4) Uani 1 1 d . . . . .
H20 H 0.5109 0.7844 0.4239 0.052 Uiso 1 1 calc R U . . .
C21 C 0.56424(11) 0.76276(15) 0.31835(10) 0.0357(3) Uani 1 1 d . . . . .
C22 C 0.59512(14) 0.46569(18) 0.18246(12) 0.0449(4) Uani 1 1 d . . . . .
C23 C 0.6225(2) 0.3508(2) 0.05889(16) 0.0670(6) Uani 1 1 d . . . . .
H23A H 0.5539 0.3124 0.0328 0.080 Uiso 1 1 calc R U . . .
H23B H 0.6670 0.2816 0.1004 0.080 Uiso 1 1 calc R U . . .
C24 C 0.6593(2) 0.3855(3) -0.01630(16) 0.0737(6) Uani 1 1 d . . . . .
H24A H 0.6168 0.4572 -0.0553 0.111 Uiso 1 1 calc R U . . .
H24B H 0.6566 0.3033 -0.0530 0.111 Uiso 1 1 calc R U . . .
H24C H 0.7286 0.4185 0.0104 0.111 Uiso 1 1 calc R U . . .
N1 N 0.50807(11) 0.34605(13) 0.43763(9) 0.0410(3) Uani 1 1 d . . . . .
N2 N 0.42322(10) 0.49367(13) 0.32180(9) 0.0375(3) Uani 1 1 d . . . . .
N3 N 0.55996(10) 0.62106(13) 0.29768(9) 0.0367(3) Uani 1 1 d . . . . .
O1 O 0.57163(16) 0.35755(15) 0.20754(11) 0.0822(6) Uani 1 1 d . . . . .
O2 O 0.62264(12) 0.47828(13) 0.10943(9) 0.0581(4) Uani 1 1 d . . . . .
 
loop_
 _atom_site_aniso_label
 _atom_site_aniso_U_11
 _atom_site_aniso_U_22
 _atom_site_aniso_U_33
 _atom_site_aniso_U_23
 _atom_site_aniso_U_13
 _atom_site_aniso_U_12
C1 0.0491(8) 0.0272(7) 0.0397(7) -0.0018(6) 0.0232(7) -0.0026(6)
C2 0.0419(8) 0.0316(7) 0.0403(7) 0.0011(6) 0.0213(6) -0.0039(6)
C3 0.0484(9) 0.0495(10) 0.0491(9) 0.0079(8) 0.0164(8) -0.0013(7)
C4 0.0431(9) 0.0602(12) 0.0707(12) 0.0034(10) 0.0128(9) 0.0025(8)
C5 0.0435(9) 0.0527(11) 0.0839(14) -0.0095(10) 0.0291(9) -0.0130(8)
C6 0.0533(10) 0.0425(9) 0.0628(11) -0.0018(8) 0.0323(9) -0.0101(7)
C7 0.0472(9) 0.0314(7) 0.0454(8) -0.0046(6) 0.0242(7) -0.0070(6)
C8 0.0422(8) 0.0366(8) 0.0428(8) -0.0070(6) 0.0158(7) 0.0027(6)
C9 0.0476(10) 0.0525(10) 0.0610(11) 0.0099(8) 0.0235(8) 0.0004(8)
C10 0.0452(10) 0.0721(14) 0.0852(15) 0.0037(12) 0.0258(10) 0.0022(9)
C11 0.0484(11) 0.0673(13) 0.0754(14) -0.0050(11) 0.0124(10) 0.0114(10)
C12 0.0657(13) 0.0558(12) 0.0670(12) 0.0128(10) 0.0078(10) 0.0147(10)
C13 0.0586(11) 0.0435(10) 0.0633(11) 0.0078(8) 0.0176(9) -0.0020(8)
C14 0.0487(9) 0.0360(8) 0.0392(8) 0.0012(6) 0.0240(7) -0.0031(6)
C15 0.0601(10) 0.0389(9) 0.0459(8) 0.0031(7) 0.0319(8) -0.0056(7)
C16 0.0501(9) 0.0336(8) 0.0412(8) 0.0044(6) 0.0213(7) -0.0031(6)
C17 0.0743(12) 0.0336(8) 0.0541(10) 0.0070(7) 0.0302(9) -0.0077(8)
C18 0.0814(13) 0.0296(8) 0.0618(11) -0.0004(7) 0.0292(10) -0.0029(8)
C19 0.0684(12) 0.0406(9) 0.0536(10) -0.0063(7) 0.0286(9) 0.0026(8)
C20 0.0538(9) 0.0387(8) 0.0443(8) 0.0000(6) 0.0250(7) -0.0023(7)
C21 0.0405(8) 0.0300(7) 0.0381(7) 0.0030(6) 0.0163(6) -0.0024(6)
C22 0.0580(10) 0.0391(9) 0.0432(8) -0.0019(7) 0.0254(7) -0.0039(7)
C23 0.1025(17) 0.0487(11) 0.0652(12) -0.0125(9) 0.0490(12) 0.0015(11)
C24 0.0857(16) 0.0837(16) 0.0658(13) -0.0135(11) 0.0445(12) 0.0045(12)
N1 0.0533(8) 0.0306(6) 0.0466(7) 0.0016(5) 0.0272(6) -0.0049(5)
N2 0.0396(7) 0.0342(6) 0.0417(7) -0.0016(5) 0.0184(5) -0.0020(5)
N3 0.0480(7) 0.0294(6) 0.0397(6) 0.0016(5) 0.0244(6) -0.0038(5)
O1 0.1583(17) 0.0395(7) 0.0755(10) -0.0115(7) 0.0747(11) -0.0248(9)
O2 0.0907(10) 0.0419(7) 0.0612(8) -0.0065(6) 0.0510(7) -0.0027(6)
 
_geom_special_details
;
 All esds (except the esd in the dihedral angle between two l.s. planes)
 are estimated using the full covariance matrix.  The cell esds are taken
 into account individually in the estimation of esds in distances, angles
 and torsion angles; correlations between esds in cell parameters are only
 used when they are defined by crystal symmetry.  An approximate (isotropic)
 treatment of cell esds is used for estimating esds involving l.s. planes.
;
 
loop_
 _geom_bond_atom_site_label_1
 _geom_bond_atom_site_label_2
 _geom_bond_distance
 _geom_bond_site_symmetry_2
 _geom_bond_publ_flag
C1 N1 1.3643(19) . ?
C1 C2 1.368(2) . ?
C1 C8 1.470(2) . ?
C2 N2 1.3842(19) . ?
C2 N3 1.4045(18) . ?
C3 C4 1.354(3) . ?
C3 N2 1.367(2) . ?
C3 H3 0.9300 . ?
C4 C5 1.413(3) . ?
C4 H4 0.9300 . ?
C5 C6 1.351(3) . ?
C5 H5 0.9300 . ?
C6 C7 1.407(2) . ?
C6 H6 0.9300 . ?
C7 N1 1.339(2) . ?
C7 N2 1.373(2) . ?
C8 C9 1.389(2) . ?
C8 C13 1.408(2) . ?
C9 C10 1.372(3) . ?
C9 H9 0.9300 . ?
C10 C11 1.359(3) . ?
C10 H10 0.9300 . ?
C11 C12 1.364(3) . ?
C11 H11 0.9300 . ?
C12 C13 1.376(3) . ?
C12 H12 0.9300 . ?
C13 H13 0.9300 . ?
C14 C15 1.360(2) . ?
C14 N3 1.3980(19) . ?
C14 C22 1.466(2) . ?
C15 C16 1.422(2) . ?
C15 H15 0.9300 . ?
C16 C17 1.404(2) . ?
C16 C21 1.405(2) . ?
C17 C18 1.367(3) . ?
C17 H17 0.9300 . ?
C18 C19 1.395(3) . ?
C18 H18 0.9300 . ?
C19 C20 1.377(2) . ?
C19 H19 0.9300 . ?
C20 C21 1.393(2) . ?
C20 H20 0.9300 . ?
C21 N3 1.3852(19) . ?
C22 O1 1.191(2) . ?
C22 O2 1.326(2) . ?
C23 O2 1.444(2) . ?
C23 C24 1.474(3) . ?
C23 H23A 0.9700 . ?
C23 H23B 0.9700 . ?
C24 H24A 0.9600 . ?
C24 H24B 0.9600 . ?
C24 H24C 0.9600 . ?
 
loop_
 _geom_angle_atom_site_label_1
 _geom_angle_atom_site_label_2
 _geom_angle_atom_site_label_3
 _geom_angle
 _geom_angle_site_symmetry_1
 _geom_angle_site_symmetry_3
 _geom_angle_publ_flag
N1 C1 C2 111.22(14) . . ?
N1 C1 C8 120.13(14) . . ?
C2 C1 C8 128.65(14) . . ?
C1 C2 N2 105.86(13) . . ?
C1 C2 N3 133.78(14) . . ?
N2 C2 N3 120.36(13) . . ?
C4 C3 N2 118.72(17) . . ?
C4 C3 H3 120.6 . . ?
N2 C3 H3 120.6 . . ?
C3 C4 C5 120.18(18) . . ?
C3 C4 H4 119.9 . . ?
C5 C4 H4 119.9 . . ?
C6 C5 C4 120.35(17) . . ?
C6 C5 H5 119.8 . . ?
C4 C5 H5 119.8 . . ?
C5 C6 C7 119.82(17) . . ?
C5 C6 H6 120.1 . . ?
C7 C6 H6 120.1 . . ?
N1 C7 N2 111.50(13) . . ?
N1 C7 C6 130.57(15) . . ?
N2 C7 C6 117.91(15) . . ?
C9 C8 C13 117.51(16) . . ?
C9 C8 C1 123.42(15) . . ?
C13 C8 C1 119.05(15) . . ?
C10 C9 C8 121.01(18) . . ?
C10 C9 H9 119.5 . . ?
C8 C9 H9 119.5 . . ?
C11 C10 C9 120.8(2) . . ?
C11 C10 H10 119.6 . . ?
C9 C10 H10 119.6 . . ?
C10 C11 C12 119.6(2) . . ?
C10 C11 H11 120.2 . . ?
C12 C11 H11 120.2 . . ?
C11 C12 C13 121.1(2) . . ?
C11 C12 H12 119.4 . . ?
C13 C12 H12 119.4 . . ?
C12 C13 C8 119.91(18) . . ?
C12 C13 H13 120.0 . . ?
C8 C13 H13 120.0 . . ?
C15 C14 N3 109.41(13) . . ?
C15 C14 C22 128.80(14) . . ?
N3 C14 C22 121.73(13) . . ?
C14 C15 C16 107.69(13) . . ?
C14 C15 H15 126.2 . . ?
C16 C15 H15 126.2 . . ?
C17 C16 C21 118.69(15) . . ?
C17 C16 C15 134.19(15) . . ?
C21 C16 C15 107.11(13) . . ?
C18 C17 C16 118.97(16) . . ?
C18 C17 H17 120.5 . . ?
C16 C17 H17 120.5 . . ?
C17 C18 C19 121.06(16) . . ?
C17 C18 H18 119.5 . . ?
C19 C18 H18 119.5 . . ?
C20 C19 C18 122.06(17) . . ?
C20 C19 H19 119.0 . . ?
C18 C19 H19 119.0 . . ?
C19 C20 C21 116.55(15) . . ?
C19 C20 H20 121.7 . . ?
C21 C20 H20 121.7 . . ?
N3 C21 C20 129.36(14) . . ?
N3 C21 C16 107.97(13) . . ?
C20 C21 C16 122.67(14) . . ?
O1 C22 O2 123.95(16) . . ?
O1 C22 C14 125.81(15) . . ?
O2 C22 C14 110.21(14) . . ?
O2 C23 C24 107.82(18) . . ?
O2 C23 H23A 110.1 . . ?
C24 C23 H23A 110.1 . . ?
O2 C23 H23B 110.1 . . ?
C24 C23 H23B 110.1 . . ?
H23A C23 H23B 108.5 . . ?
C23 C24 H24A 109.5 . . ?
C23 C24 H24B 109.5 . . ?
H24A C24 H24B 109.5 . . ?
C23 C24 H24C 109.5 . . ?
H24A C24 H24C 109.5 . . ?
H24B C24 H24C 109.5 . . ?
C7 N1 C1 105.04(13) . . ?
C3 N2 C7 122.98(14) . . ?
C3 N2 C2 130.65(14) . . ?
C7 N2 C2 106.37(12) . . ?
C21 N3 C14 107.81(12) . . ?
C21 N3 C2 124.04(12) . . ?
C14 N3 C2 128.14(13) . . ?
C22 O2 C23 116.13(14) . . ?
 
loop_
 _geom_torsion_atom_site_label_1
 _geom_torsion_atom_site_label_2
 _geom_torsion_atom_site_label_3
 _geom_torsion_atom_site_label_4
 _geom_torsion
 _geom_torsion_site_symmetry_1
 _geom_torsion_site_symmetry_2
 _geom_torsion_site_symmetry_3
 _geom_torsion_site_symmetry_4
 _geom_torsion_publ_flag
N1 C1 C2 N2 -0.28(17) . . . . ?
C8 C1 C2 N2 179.99(14) . . . . ?
N1 C1 C2 N3 179.40(15) . . . . ?
C8 C1 C2 N3 -0.3(3) . . . . ?
N2 C3 C4 C5 0.9(3) . . . . ?
C3 C4 C5 C6 -2.0(3) . . . . ?
C4 C5 C6 C7 0.9(3) . . . . ?
C5 C6 C7 N1 179.32(18) . . . . ?
C5 C6 C7 N2 1.1(2) . . . . ?
N1 C1 C8 C9 -176.15(16) . . . . ?
C2 C1 C8 C9 3.5(3) . . . . ?
N1 C1 C8 C13 2.5(2) . . . . ?
C2 C1 C8 C13 -177.83(16) . . . . ?
C13 C8 C9 C10 -1.1(3) . . . . ?
C1 C8 C9 C10 177.52(18) . . . . ?
C8 C9 C10 C11 0.6(3) . . . . ?
C9 C10 C11 C12 0.1(4) . . . . ?
C10 C11 C12 C13 -0.2(4) . . . . ?
C11 C12 C13 C8 -0.3(3) . . . . ?
C9 C8 C13 C12 1.0(3) . . . . ?
C1 C8 C13 C12 -177.71(18) . . . . ?
N3 C14 C15 C16 -0.8(2) . . . . ?
C22 C14 C15 C16 176.46(17) . . . . ?
C14 C15 C16 C17 -178.4(2) . . . . ?
C14 C15 C16 C21 0.51(19) . . . . ?
C21 C16 C17 C18 -0.7(3) . . . . ?
C15 C16 C17 C18 178.09(19) . . . . ?
C16 C17 C18 C19 0.8(3) . . . . ?
C17 C18 C19 C20 -0.1(3) . . . . ?
C18 C19 C20 C21 -0.6(3) . . . . ?
C19 C20 C21 N3 -178.19(16) . . . . ?
C19 C20 C21 C16 0.6(2) . . . . ?
C17 C16 C21 N3 179.06(15) . . . . ?
C15 C16 C21 N3 -0.06(18) . . . . ?
C17 C16 C21 C20 0.0(2) . . . . ?
C15 C16 C21 C20 -179.09(15) . . . . ?
C15 C14 C22 O1 179.1(2) . . . . ?
N3 C14 C22 O1 -4.0(3) . . . . ?
C15 C14 C22 O2 -2.7(3) . . . . ?
N3 C14 C22 O2 174.19(15) . . . . ?
N2 C7 N1 C1 0.48(17) . . . . ?
C6 C7 N1 C1 -177.82(17) . . . . ?
C2 C1 N1 C7 -0.11(17) . . . . ?
C8 C1 N1 C7 179.64(13) . . . . ?
C4 C3 N2 C7 1.1(3) . . . . ?
C4 C3 N2 C2 -178.93(17) . . . . ?
N1 C7 N2 C3 179.29(15) . . . . ?
C6 C7 N2 C3 -2.2(2) . . . . ?
N1 C7 N2 C2 -0.66(17) . . . . ?
C6 C7 N2 C2 177.88(14) . . . . ?
C1 C2 N2 C3 -179.39(16) . . . . ?
N3 C2 N2 C3 0.9(2) . . . . ?
C1 C2 N2 C7 0.56(16) . . . . ?
N3 C2 N2 C7 -179.18(13) . . . . ?
C20 C21 N3 C14 178.54(16) . . . . ?
C16 C21 N3 C14 -0.41(17) . . . . ?
C20 C21 N3 C2 -2.1(3) . . . . ?
C16 C21 N3 C2 178.99(14) . . . . ?
C15 C14 N3 C21 0.75(19) . . . . ?
C22 C14 N3 C21 -176.72(15) . . . . ?
C15 C14 N3 C2 -178.62(15) . . . . ?
C22 C14 N3 C2 3.9(3) . . . . ?
C1 C2 N3 C21 -98.5(2) . . . . ?
N2 C2 N3 C21 81.16(19) . . . . ?
C1 C2 N3 C14 80.8(2) . . . . ?
N2 C2 N3 C14 -99.56(19) . . . . ?
O1 C22 O2 C23 0.4(3) . . . . ?
C14 C22 O2 C23 -177.83(17) . . . . ?
C24 C23 O2 C22 -177.53(18) . . . . ?
 
_refine_diff_density_max    0.348
_refine_diff_density_min   -0.232
_refine_diff_density_rms    0.040

_shelx_res_file
;

    BS8_0m_a.res created by SHELXL-2014/7

TITL BS8_0m_a.res in P2(1)/n
CELL  0.71073  14.0790   9.5407  15.4359   90.000  111.764   90.000
ZERR    4.000   0.0007   0.0004   0.0007    0.000    0.001    0.000
LATT 1
SYMM 1/2-X, 1/2+Y, 1/2-Z
SFAC C  H  N  O
UNIT 96  76  12  8
L.S. 25
ACTA
BOND $H
FMAP 2
PLAN 5
CONF
SIZE 0.40 0.30 0.22
TEMP 21
WGHT    0.070800    0.712600
FVAR       0.95446
C1    1    0.576010    0.426004    0.415246    11.00000    0.04911    0.02717 =
         0.03966   -0.00181    0.02323   -0.00264
C2    1    0.526650    0.517784    0.344786    11.00000    0.04189    0.03162 =
         0.04030    0.00108    0.02133   -0.00392
C3    1    0.339830    0.554807    0.255876    11.00000    0.04837    0.04950 =
         0.04911    0.00787    0.01637   -0.00126
AFIX  43
H3    2    0.347812    0.624028    0.216698    11.00000   -1.20000
AFIX   0
C4    1    0.245378    0.512658    0.248709    11.00000    0.04311    0.06023 =
         0.07069    0.00339    0.01276    0.00251
AFIX  43
H4    2    0.187772    0.552106    0.203647    11.00000   -1.20000
AFIX   0
C5    1    0.234092    0.408869    0.309525    11.00000    0.04353    0.05275 =
         0.08390   -0.00948    0.02909   -0.01300
AFIX  43
H5    2    0.169045    0.382349    0.305562    11.00000   -1.20000
AFIX   0
C6    1    0.317325    0.347968    0.373400    11.00000    0.05332    0.04254 =
         0.06278   -0.00184    0.03234   -0.01009
AFIX  43
H6    2    0.309569    0.278796    0.412715    11.00000   -1.20000
AFIX   0
C7    1    0.415731    0.389487    0.380262    11.00000    0.04719    0.03140 =
         0.04543   -0.00461    0.02423   -0.00702
C8    1    0.686575    0.407089    0.465549    11.00000    0.04222    0.03662 =
         0.04279   -0.00697    0.01580    0.00269
C9    1    0.760117    0.489826    0.450455    11.00000    0.04759    0.05254 =
         0.06098    0.00986    0.02346    0.00040
AFIX  43
H9    2    0.739850    0.559035    0.404802    11.00000   -1.20000
AFIX   0
C10   1    0.862184    0.471036    0.501844    11.00000    0.04516    0.07212 =
         0.08519    0.00366    0.02582    0.00222
AFIX  43
H10   2    0.910114    0.528191    0.490968    11.00000   -1.20000
AFIX   0
C11   1    0.894172    0.369910    0.568483    11.00000    0.04844    0.06725 =
         0.07538   -0.00498    0.01235    0.01135
AFIX  43
H11   2    0.963542    0.358088    0.603059    11.00000   -1.20000
AFIX   0
C12   1    0.823922    0.285923    0.584316    11.00000    0.06572    0.05579 =
         0.06695    0.01284    0.00780    0.01472
AFIX  43
H12   2    0.846013    0.216585    0.629775    11.00000   -1.20000
AFIX   0
C13   1    0.720899    0.301989    0.534190    11.00000    0.05864    0.04348 =
         0.06327    0.00777    0.01756   -0.00204
AFIX  43
H13   2    0.674015    0.243498    0.545644    11.00000   -1.20000
AFIX   0
C14   1    0.594959    0.603276    0.224641    11.00000    0.04870    0.03599 =
         0.03924    0.00116    0.02401   -0.00306
C15   1    0.621949    0.729898    0.200377    11.00000    0.06010    0.03889 =
         0.04591    0.00312    0.03193   -0.00562
AFIX  43
H15   2    0.648242    0.746090    0.154190    11.00000   -1.20000
AFIX   0
C16   1    0.602738    0.833057    0.258321    11.00000    0.05009    0.03358 =
         0.04115    0.00442    0.02135   -0.00311
C17   1    0.612830    0.979476    0.264962    11.00000    0.07434    0.03357 =
         0.05411    0.00703    0.03021   -0.00774
AFIX  43
H17   2    0.638818    1.028584    0.226591    11.00000   -1.20000
AFIX   0
C18   1    0.583850    1.048743    0.328726    11.00000    0.08144    0.02963 =
         0.06182   -0.00042    0.02918   -0.00289
AFIX  43
H18   2    0.589524    1.145833    0.333017    11.00000   -1.20000
AFIX   0
C19   1    0.545909    0.976108    0.387448    11.00000    0.06835    0.04056 =
         0.05361   -0.00626    0.02862    0.00257
AFIX  43
H19   2    0.526957    1.026266    0.430141    11.00000   -1.20000
AFIX   0
C20   1    0.535643    0.832434    0.384168    11.00000    0.05375    0.03874 =
         0.04429    0.00000    0.02504   -0.00227
AFIX  43
H20   2    0.510891    0.784425    0.423858    11.00000   -1.20000
AFIX   0
C21   1    0.564245    0.762758    0.318345    11.00000    0.04053    0.02998 =
         0.03810    0.00302    0.01630   -0.00240
C22   1    0.595122    0.465690    0.182464    11.00000    0.05800    0.03909 =
         0.04321   -0.00191    0.02537   -0.00385
C23   1    0.622504    0.350822    0.058890    11.00000    0.10254    0.04874 =
         0.06524   -0.01252    0.04898    0.00150
AFIX  23
H23A  2    0.553904    0.312407    0.032771    11.00000   -1.20000
H23B  2    0.666950    0.281647    0.100442    11.00000   -1.20000
AFIX   0
C24   1    0.659334    0.385488   -0.016297    11.00000    0.08568    0.08371 =
         0.06575   -0.01346    0.04446    0.00446
AFIX 137
H24A  2    0.616797    0.457225   -0.055251    11.00000   -1.50000
H24B  2    0.656621    0.303312   -0.053032    11.00000   -1.50000
H24C  2    0.728579    0.418511    0.010409    11.00000   -1.50000
AFIX   0
N1    3    0.508071    0.346052    0.437629    11.00000    0.05327    0.03064 =
         0.04655    0.00160    0.02719   -0.00491
N2    3    0.423224    0.493666    0.321800    11.00000    0.03962    0.03416 =
         0.04170   -0.00164    0.01837   -0.00195
N3    3    0.559965    0.621059    0.297676    11.00000    0.04800    0.02936 =
         0.03971    0.00162    0.02441   -0.00384
O1    4    0.571634    0.357552    0.207545    11.00000    0.15835    0.03955 =
         0.07552   -0.01150    0.07466   -0.02483
O2    4    0.622644    0.478282    0.109430    11.00000    0.09070    0.04188 =
         0.06123   -0.00654    0.05101   -0.00270
HKLF 4

REM  BS8_0m_a.res in P2(1)/n
REM R1 =  0.0569 for    3802 Fo > 4sig(Fo)  and  0.0726 for all    4782 data
REM    263 parameters refined using      0 restraints

END

WGHT      0.0706      0.7147

REM Highest difference peak  0.348,  deepest hole -0.232,  1-sigma level  0.040
Q1    1   0.6545  0.3596  0.2471  11.00000  0.05    0.35
Q2    1   0.5964  0.5032  0.3824  11.00000  0.05    0.32
Q3    1   0.5715  0.3268  0.4795  11.00000  0.05    0.27
Q4    1   0.6580  0.3448  0.4985  11.00000  0.05    0.27
Q5    1   0.5824  0.3529 -0.0200  11.00000  0.05    0.26
;
_shelx_res_checksum   58463

_shelx_hkl_file
;
  -3   0   0    0.30    0.50
   3   0   0    0.90    0.80
   3   0   0    1.30    0.50
   3   0   0    0.60    0.60
   3   0   0    1.10    0.40
   3   0   0   -0.70    0.50
  -3   0   0    1.10    0.60
  -3   0   0    0.70    0.60
  -3   0   0    0.90    0.80
   5   0   0    8.00    1.10
   5   0   0    6.80    0.90
   5   0   0    3.90    1.00
   5   0   0    9.40    1.60
  -5   0   0    3.70    1.10
   5   0   0    4.10    1.00
  -5   0   0    5.30    1.20
  -5   0   0    6.20    1.30
  -6   0   0 3942.81  102.59
   6   0   0 3857.21  102.49
   6   0   0 3884.61  101.99
  -6   0   0 3954.60  102.09
   6   0   0 3881.51  101.99
  -6   0   0 3961.80  102.09
  -7   0   0    1.80    1.40
   7   0   0    0.30    1.40
   7   0   0    5.80    1.80
   7   0   0   -1.50    1.40
  -7   0   0    1.00    1.40
  -7   0   0    4.40    1.70
   8   0   0   -0.30    1.50
   8   0   0    2.40    1.10
  -8   0   0    0.10    1.30
  -8   0   0   -1.80    1.20
   8   0   0   -0.20    1.40
  -8   0   0    0.80    1.80
   8   0   0    1.00    0.90
  -9   0   0    1.00    1.60
   9   0   0    2.20    1.10
   9   0   0    2.70    1.30
  -9   0   0   -2.40    1.30
  -9   0   0    2.10    2.20
   9   0   0    1.40    1.70
   9   0   0    0.20    1.50
  10   0   0    5.50    2.10
  10   0   0    3.70    1.50
 -10   0   0    8.20    2.60
 -10   0   0    2.40    2.00
 -10   0   0    0.80    1.70
  10   0   0    0.00    1.80
  10   0   0    3.70    1.70
  11   0   0    5.70    1.60
  11   0   0    8.80    2.00
 -11   0   0    9.20    2.60
 -11   0   0    9.70    2.50
  11   0   0    4.60    2.40
  12   0   0  239.18    8.30
 -12   0   0  247.58    9.50
 -12   0   0  235.18    9.40
  12   0   0  231.08    7.70
 -13   0   0   10.40    2.80
 -13   0   0    6.80    2.80
  13   0   0    8.20    2.30
  13   0   0    2.60    1.90
  14   0   0   37.60    4.10
 -14   0   0   44.10    5.50
 -14   0   0   55.19    5.50
  15   0   0    3.50    2.70
 -15   0   0   -0.40    3.30
 -15   0   0    3.00    3.40
 -16   0   0    5.20    4.10
 -16   0   0    4.10    4.20
 -16   0   0    2.40    3.70
 -17   0   0    6.70    5.20
 -17   0   0    5.90    4.90
 -17   0   0    4.00    4.60
   2  -1   0 1779.52   45.60
   2   1   0 1742.13   45.50
  -2   1   0 1692.03   45.50
   2   1   0 1740.43   45.30
   2   1   0 1757.92   45.40
  -2   1   0 1765.22   45.60
   3  -1   0  518.25   14.40
   3  -1   0  546.35   14.70
  -3  -1   0  537.35   14.40
  -3  -1   0  561.14   14.50
   3  -1   0  527.15   14.40
  -3  -1   0  543.75   14.40
   3  -1   0  520.15   14.40
   3   1   0  533.45   14.50
  -3   1   0  533.55   14.50
  -3   1   0  522.65   14.40
  -3   1   0  529.35   14.70
  -3   1   0  533.15   14.40
   3   1   0  537.95   14.40
   3   1   0  533.55   14.40
   4  -1   0 1680.43   44.70
  -4  -1   0 1685.73   44.90
   4  -1   0 1707.83   44.90
  -4  -1   0 1703.63   45.40
   4  -1   0 1696.93   44.90
  -4  -1   0 1731.83   44.90
  -4  -1   0 1702.83   44.90
   4  -1   0 1734.13   45.20
  -4   1   0 1690.93   44.90
  -4   1   0 1686.03   44.70
  -4   1   0 1716.23   44.90
   4   1   0 1715.23   44.80
   4   1   0 1715.83   44.90
  -4   1   0 1752.02   45.30
  -5  -1   0  169.28    6.00
   5  -1   0  173.48    6.00
  -5  -1   0  163.08    5.50
  -5  -1   0  167.28    5.50
   5  -1   0  169.98    5.20
  -5  -1   0  172.48    5.60
   5  -1   0  170.38    5.60
   5  -1   0  170.38    5.30
  -5   1   0  162.28    5.50
  -5   1   0  172.18    5.60
   5   1   0  172.38    5.60
   5   1   0  169.98    5.50
  -5   1   0  171.58    5.90
  -6  -1   0   18.10    2.00
  -6  -1   0   18.70    1.90
   6  -1   0   19.30    1.60
  -6  -1   0   19.10    2.60
   6  -1   0   18.70    2.00
   6  -1   0   18.80    2.40
   6  -1   0   15.50    1.90
   6  -1   0   20.40    1.60
  -6  -1   0   19.20    1.90
  -6   1   0   17.50    2.40
   6   1   0   23.60    2.00
   6   1   0   19.40    1.90
   6   1   0   19.50    1.80
  -6   1   0   17.90    2.00
   6   1   0   18.90    1.10
  -6   1   0   22.50    2.00
   7  -1   0   93.29    3.50
  -7  -1   0   85.09    3.90
   7  -1   0   85.89    4.00
  -7  -1   0   92.39    4.00
  -7  -1   0   91.79    4.00
   7  -1   0   91.59    4.60
   7  -1   0   92.59    4.10
  -7  -1   0   92.19    4.70
   7  -1   0  100.29    4.20
   7   1   0   90.89    3.80
  -7   1   0   90.99    4.00
  -7   1   0   94.49    4.60
   7   1   0   93.09    4.00
   7   1   0   96.39    4.00
   7   1   0   93.29    3.00
  -7   1   0   84.99    4.00
   8  -1   0    2.80    1.20
   8  -1   0    0.00    1.40
  -8  -1   0    1.40    1.80
   8  -1   0    1.50    1.00
  -8  -1   0    0.00    1.30
   8  -1   0   -1.40    1.50
  -8  -1   0   -0.30    1.30
   8  -1   0   -0.60    1.20
  -8  -1   0    1.00    1.30
   8   1   0    0.90    1.30
  -8   1   0   -0.70    1.30
   8   1   0    0.60    1.20
   8   1   0    2.10    1.30
  -8   1   0    2.40    1.80
   8   1   0    1.10    0.70
  -8   1   0   -1.10    1.30
   9  -1   0  211.88    7.80
  -9  -1   0  216.78    7.90
   9  -1   0  216.78    7.90
   9  -1   0  223.68    7.10
  -9  -1   0  217.98    8.70
  -9  -1   0  217.38    7.90
   9  -1   0  222.18    8.60
   9  -1   0  217.48    7.10
  -9   1   0  225.98    7.90
  -9   1   0  220.18    7.90
   9   1   0  228.68    6.50
  -9   1   0  205.18    8.40
   9   1   0  215.28    7.90
   9   1   0  214.18    7.80
   9   1   0  223.88    7.40
  10  -1   0   38.20    3.70
 -10  -1   0   38.00    3.60
  10  -1   0   40.40    2.90
 -10  -1   0   39.70    3.60
  10  -1   0   31.90    3.60
  10  -1   0   37.70    2.70
  10  -1   0   35.30    4.20
 -10   1   0   34.30    3.60
  10   1   0   38.30    2.10
  10   1   0   41.30    3.70
 -10   1   0   33.60    4.30
  10   1   0   37.50    3.00
 -10   1   0   36.70    3.70
 -11  -1   0  477.05   14.80
  11  -1   0  453.55   13.50
  11  -1   0  458.35   14.80
  11  -1   0  459.05   13.60
 -11  -1   0  456.95   14.70
  11   1   0  445.36   12.70
 -11   1   0  464.55   14.80
 -11   1   0  457.55   14.80
  11   1   0  461.65   14.00
  11   1   0  460.55   15.40
 -12  -1   0   45.30    4.70
 -12  -1   0   50.39    4.50
  12  -1   0   40.20    5.00
  12  -1   0   43.80    3.50
  12  -1   0   44.40    3.70
  12   1   0   51.39    3.90
 -12   1   0   46.60    4.80
 -12   1   0   53.49    4.90
  12   1   0   47.60    2.50
  13  -1   0   30.60    3.30
  13  -1   0   34.50    3.70
 -13  -1   0   29.10    3.90
 -13  -1   0   28.60    4.00
 -13   1   0   36.20    4.40
  13   1   0   28.40    3.70
  14  -1   0   29.00    3.60
 -14  -1   0   25.20    4.20
  14   1   0   31.20    3.60
 -14   1   0   26.30    4.40
 -14   1   0   28.80    4.20
 -14   1   0   22.60    3.80
 -15  -1   0   17.90    3.70
  15  -1   0   19.00    3.00
 -15  -1   0   16.10    4.20
 -15   1   0   15.20    4.30
  15   1   0   22.00    3.50
 -15   1   0   17.60    4.40
 -15   1   0   18.90    4.30
 -16  -1   0   11.90    4.40
 -16  -1   0   12.00    4.30
 -16   1   0    7.60    4.10
 -16   1   0   13.00    4.40
  16   1   0    7.50    3.40
 -16   1   0   10.00    4.00
 -17  -1   0   19.50    5.40
 -17  -1   0   13.00    5.10
 -17  -1   0   17.40    5.20
 -17   1   0   15.60    5.30
 -17   1   0   15.00    5.40
 -17   1   0   16.30    5.20
  -2  -2   0   21.30    2.00
  -2  -2   0   18.90    1.00
  -2  -2   0   18.50    1.00
  -2  -2   0   20.80    1.30
   2  -2   0   18.50    1.10
   2  -2   0   18.60    1.10
   2  -2   0   18.60    1.40
   2  -2   0   14.80    1.30
  -2  -2   0   21.50    1.40
   2  -2   0   20.30    1.50
   2   2   0   17.90    1.30
  -2   2   0   17.90    1.00
   2   2   0   19.50    2.00
  -2   2   0   16.40    1.40
   2   2   0   19.60    1.00
  -2   2   0   21.70    1.40
  -2   2   0   20.70    1.40
   2   2   0   18.30    1.00
   2   2   0   18.60    1.10
   3  -2   0 1662.73   43.10
  -3  -2   0 1649.83   43.40
   3  -2   0 1616.74   43.10
   3  -2   0 1711.53   43.40
   3  -2   0 1667.23   43.50
  -3  -2   0 1682.23   43.00
   3   2   0 1640.14   44.00
   3   2   0 1661.93   43.00
   3   2   0 1672.23   42.80
   3   2   0 1646.84   43.60
  -3   2   0 1644.84   43.40
  -3   2   0 1709.23   43.50
  -3   2   0 1432.96   43.10
   3   2   0 1652.83   43.00
  -3   2   0 1656.43   43.10
   4  -2   0  236.38    7.80
  -4  -2   0  244.58    7.20
   4  -2   0  238.78    7.20
   4  -2   0  234.98    7.20
  -4  -2   0  243.08    7.50
  -4  -2   0  242.68    7.10
   4  -2   0  237.88    7.40
   4   2   0  246.18    7.20
   4   2   0  239.38    8.10
   4   2   0  246.98    6.70
   4   2   0  240.68    7.40
  -4   2   0  240.98    7.30
  -4   2   0  245.48    7.60
   4   2   0  251.47    7.20
  -4   2   0  235.58    7.20
  -4   2   0  244.98    7.60
  -4   2   0  243.28    7.40
   5  -2   0  664.53   18.20
  -5  -2   0  663.93   18.30
  -5  -2   0  681.03   18.10
   5  -2   0  663.33   18.20
   5  -2   0  655.13   18.10
  -5  -2   0  661.43   18.10
   5  -2   0  651.13   18.60
  -5   2   0  662.03   18.20
   5   2   0  663.73   18.10
  -5   2   0  635.24   18.50
  -5   2   0  660.13   18.60
   5   2   0  646.84   17.30
   5   2   0  630.74   18.20
  -5   2   0  673.23   18.20
   5   2   0  663.03   18.10
   6  -2   0 1990.30   51.69
  -6  -2   0 1929.81   51.79
  -6  -2   0 1982.00   52.49
   6  -2   0 2003.90   52.29
   6  -2   0 1975.20   51.69
  -6  -2   0 1937.71   51.69
   6  -2   0 1931.41   51.69
  -6  -2   0 1910.01   51.69
  -6   2   0 1890.51   52.09
  -6   2   0 2002.10   52.29
   6   2   0 1949.70   51.69
  -6   2   0 1930.11   51.79
  -6   2   0 1984.20   51.79
  -6   2   0 1960.90   51.69
   6   2   0 1954.90   51.69
   6   2   0 1950.20   51.59
  -7  -2   0   71.89    3.50
  -7  -2   0   74.89    3.70
   7  -2   0   68.49    3.50
   7  -2   0   74.99    3.60
  -7  -2   0   76.99    3.60
  -7  -2   0   76.89    4.40
   7  -2   0   75.19    4.10
   7  -2   0   73.79    3.10
   7  -2   0   70.39    3.40
  -7   2   0   76.39    4.10
   7   2   0   71.59    3.50
  -7   2   0   71.09    3.80
  -7   2   0   76.99    3.70
   7   2   0   72.19    3.50
   7   2   0   76.39    3.60
  -7   2   0   75.49    3.60
   8  -2   0  228.68    7.70
  -8  -2   0  219.38    7.60
   8  -2   0  210.48    7.30
   8  -2   0  230.78    7.80
   8  -2   0  196.68    7.30
   8  -2   0  223.18    8.30
  -8  -2   0  224.18    8.60
  -8  -2   0  219.38    7.80
  -8  -2   0  223.48    7.70
  -8   2   0  233.28    8.10
  -8   2   0  218.48    8.30
   8   2   0  227.28    7.50
   8   2   0  214.38    7.50
  -8   2   0  220.28    7.70
  -8   2   0  233.98    7.80
   8   2   0  220.88    7.60
   9  -2   0  139.19    4.90
   9  -2   0  134.79    5.40
   9  -2   0  133.79    5.80
   9  -2   0  137.99    6.50
  -9  -2   0  141.79    5.80
  -9  -2   0  147.89    5.90
   9  -2   0  142.69    5.90
  -9  -2   0  133.69    6.90
  -9  -2   0  135.69    5.90
  -9   2   0  132.49    5.80
   9   2   0  143.09    5.60
   9   2   0  128.29    5.70
  -9   2   0  143.59    6.20
  -9   2   0  137.29    6.50
   9   2   0  139.19    5.70
  -9   2   0  142.19    5.80
  10  -2   0   53.69    4.10
  10  -2   0   53.69    3.00
  10  -2   0   56.69    4.30
  10  -2   0   49.30    4.60
 -10  -2   0   53.39    4.00
  10  -2   0   50.49    3.50
 -10  -2   0   53.29    4.20
 -10  -2   0   54.89    3.90
 -10   2   0   46.80    4.80
  10   2   0   53.59    3.70
 -10   2   0   60.59    4.40
 -10   2   0   48.80    4.00
 -10   2   0   51.09    3.90
  10   2   0   52.59    4.00
  11  -2   0   72.69    6.00
 -11  -2   0   69.59    4.90
 -11  -2   0   68.29    4.60
  11  -2   0   75.99    5.30
  11  -2   0   70.49    3.60
  11  -2   0   74.19    4.40
  11  -2   0   73.59    5.70
  11   2   0   67.59    4.40
 -11   2   0   66.89    4.80
 -11   2   0   67.69    5.00
 -11   2   0   72.09    5.30
  12  -2   0   97.39    6.40
  12  -2   0   86.79    6.50
 -12  -2   0   85.59    5.50
  12  -2   0   86.49    4.20
  12  -2   0   87.59    5.00
 -12   2   0   99.69    5.90
  12   2   0   87.39    5.10
 -12   2   0   89.49    5.80
 -12   2   0   88.29    5.90
  13  -2   0    8.60    3.00
 -13  -2   0   10.00    2.90
  13  -2   0    6.00    2.00
 -13  -2   0    3.50    2.40
  13  -2   0   11.70    3.80
 -13   2   0    3.10    2.80
 -13   2   0    5.00    2.90
 -13   2   0    8.80    2.90
  13   2   0    7.90    2.70
  14  -2   0    4.80    2.10
 -14  -2   0    7.20    2.80
 -14  -2   0    5.00    3.10
 -14   2   0    4.80    3.40
 -14   2   0    4.60    3.20
  14   2   0    2.20    2.60
 -14   2   0    5.60    3.40
 -15  -2   0    1.90    3.40
 -15  -2   0   -2.70    3.00
 -15   2   0   -2.80    3.40
  15   2   0   -1.20    3.00
 -15   2   0   -0.60    3.60
 -15   2   0    1.30    3.90
 -16  -2   0    7.30    3.70
 -16  -2   0    5.90    4.10
 -16   2   0    6.90    4.50
 -16   2   0    8.30    4.50
 -16   2   0    6.50    4.20
  16   2   0    6.50    3.70
 -17  -2   0   -0.40    4.60
 -17   2   0   -3.10    4.90
 -17   2   0    4.50    4.90
   0  -3   0   -0.10    0.80
   0  -3   0   -0.40    0.60
   0  -3   0    1.40    0.80
   0  -3   0    0.10    1.00
   0  -3   0    0.00    0.70
   0   3   0   -0.80    1.10
   0   3   0    0.40    0.80
   0   3   0    1.00    0.30
   0   3   0    0.70    0.30
   0   3   0    0.90    0.70
   0   3   0   -0.10    0.70
  -1  -3   0  693.43   19.60
   1  -3   0  732.43   19.00
   1  -3   0  691.73   18.50
  -1  -3   0  680.23   18.40
  -1  -3   0  710.43   18.90
  -1  -3   0  720.23   19.10
  -1  -3   0  725.03   19.20
  -1  -3   0  691.73   18.30
   1  -3   0  713.23   19.60
   1  -3   0  706.13   18.50
   1  -3   0  696.63   19.10
   1  -3   0  711.43   19.10
   1  -3   0  710.43   19.40
   1   3   0  694.73   19.00
   1   3   0  708.83   19.00
   1   3   0  744.43   19.80
  -1   3   0  698.93   20.80
  -1   3   0  691.83   19.00
   1   3   0  699.53   18.40
  -1   3   0  675.53   19.30
  -1   3   0  694.33   19.10
   1   3   0  711.73   18.30
  -1   3   0  691.33   18.40
   2  -3   0 2683.03   69.39
  -2  -3   0 2655.13   69.09
  -2  -3   0 2664.83   68.99
   2  -3   0 2652.53   68.99
   2  -3   0 2698.93   69.39
   2  -3   0 2605.34   69.89
  -2   3   0 2688.93   69.29
  -2   3   0 2705.93   69.19
   2   3   0 2633.34   69.29
   2   3   0 2618.74   69.79
  -2   3   0 2547.25   69.29
  -3  -3   0  359.66    9.80
   3  -3   0  350.76    9.90
  -3  -3   0  359.86   10.00
   3  -3   0  344.47   10.40
   3  -3   0  351.36    9.90
  -3  -3   0  344.07   10.90
   3  -3   0  347.07   10.40
  -3  -3   0  348.67    9.70
  -3  -3   0  346.67   10.40
   3  -3   0  372.36   10.50
  -3   3   0  354.86   10.30
   3   3   0  349.67   10.30
   3   3   0  354.96   10.90
  -3   3   0  347.97   10.40
   3   3   0  361.56    9.90
   3   3   0  352.16    9.70
  -3   3   0  354.66    9.90
  -3   3   0  338.37   10.40
  -4  -3   0  606.14   16.40
   4  -3   0  615.74   17.10
  -4  -3   0  599.44   16.40
   4  -3   0  613.04   16.50
   4  -3   0  611.54   17.00
  -4  -3   0  597.94   17.00
   4  -3   0  602.54   16.50
   4   3   0  607.44   16.40
  -4   3   0  596.24   17.00
  -4   3   0  570.64   17.70
   4   3   0  612.74   16.40
  -4   3   0  602.44   17.00
  -4   3   0  602.54   16.50
   4   3   0  611.24   17.60
   4   3   0  607.84   16.20
   4   3   0  580.34   16.90
  -5  -3   0  490.55   13.90
   5  -3   0  499.85   14.10
   5  -3   0  497.85   14.00
   5  -3   0  500.65   14.40
  -5  -3   0  488.15   13.90
  -5  -3   0  497.95   14.40
   5  -3   0  510.05   14.70
   5   3   0  499.65   13.40
  -5   3   0  506.75   14.60
  -5   3   0  492.75   14.50
   5   3   0  490.75   14.30
   5   3   0  489.15   13.90
  -5   3   0  493.95   14.00
  -5   3   0  506.55   14.40
   5   3   0  484.35   15.10
   5   3   0  492.25   13.90
  -5   3   0  504.35   14.10
  -6  -3   0    6.10    1.20
   6  -3   0    6.00    1.30
   6  -3   0    8.20    1.60
  -6  -3   0    6.90    1.60
   6  -3   0    6.80    1.70
  -6  -3   0    5.80    1.30
   6   3   0    8.00    1.50
   6   3   0    4.90    1.20
  -6   3   0    8.30    1.80
  -6   3   0    6.30    1.50
   6   3   0    4.30    2.20
  -6   3   0    5.70    1.30
  -6   3   0    6.10    1.20
  -6   3   0    7.90    1.70
   6   3   0    7.70    1.00
   6   3   0    4.90    1.10
  -7  -3   0   11.70    1.70
   7  -3   0    9.70    2.10
  -7  -3   0   10.50    2.30
   7  -3   0   13.80    2.00
   7  -3   0   13.10    1.80
  -7  -3   0    7.90    1.80
  -7  -3   0    9.70    1.60
   7  -3   0   14.50    1.90
  -7   3   0   11.50    1.80
   7   3   0   11.50    1.70
  -7   3   0   14.60    1.80
  -7   3   0   11.20    2.10
   7   3   0   13.50    1.70
   7   3   0   14.60    2.00
  -7   3   0   12.20    2.30
  -7   3   0   12.80    2.00
   7   3   0   18.50    3.30
  -8  -3   0   55.69    3.30
   8  -3   0   55.79    3.50
   8  -3   0   54.39    4.10
  -8  -3   0   52.39    3.70
   8  -3   0   53.19    3.50
  -8  -3   0   53.69    3.40
  -8  -3   0   52.99    4.40
   8  -3   0   51.29    3.50
   8   3   0   55.99    3.30
   8   3   0   53.69    5.00
   8   3   0   50.39    3.40
  -8   3   0   59.79    4.00
  -8   3   0   57.99    4.10
  -8   3   0   56.39    3.50
  -8   3   0   59.39    3.60
   8   3   0   55.39    3.30
  -9  -3   0    6.20    2.00
  -9  -3   0    4.70    1.70
   9  -3   0    5.60    1.90
   9  -3   0    6.10    1.50
   9  -3   0    7.10    2.40
  -9  -3   0    3.50    1.70
   9  -3   0    5.60    2.10
   9  -3   0    5.10    1.90
  -9   3   0    1.70    2.20
  -9   3   0    3.80    1.80
   9   3   0    1.80    1.60
  -9   3   0    4.80    2.10
  -9   3   0    4.70    1.80
   9   3   0    4.30    1.90
 -10  -3   0   71.69    5.20
 -10  -3   0   83.59    4.80
  10  -3   0   79.29    4.80
  10  -3   0   83.19    5.80
 -10  -3   0   85.49    4.60
  10  -3   0   79.49    5.00
  10  -3   0   82.99    3.60
  10  -3   0   71.69    4.60
 -10   3   0   78.79    5.20
 -10   3   0   82.99    4.90
  10   3   0   73.89    4.60
 -10   3   0   71.19    4.60
 -10   3   0   71.99    5.60
 -11  -3   0   49.90    4.30
  11  -3   0   46.30    5.40
  11  -3   0   35.70    4.70
  11  -3   0   47.60    3.10
  11  -3   0   45.60    4.10
  11  -3   0   52.39    4.60
 -11  -3   0   50.89    4.10
 -11   3   0   51.99    4.80
  11   3   0   51.09    4.10
 -11   3   0   48.20    4.30
 -11   3   0   41.50    4.40
  12  -3   0   10.40    3.30
  12  -3   0   13.60    3.70
 -12  -3   0   11.20    2.70
 -12  -3   0   12.80    2.70
  12  -3   0   12.40    2.00
  12  -3   0    5.00    2.90
 -12   3   0   11.90    3.10
  12   3   0   15.10    2.80
 -12   3   0    9.20    3.40
 -12   3   0   12.80    2.80
 -13  -3   0   24.80    3.70
 -13  -3   0   28.00    3.70
  13  -3   0   18.70    4.30
  13  -3   0   23.10    2.90
 -13   3   0   30.00    4.40
 -13   3   0   22.10    3.90
 -13   3   0   22.90    3.90
  13   3   0   26.00    3.70
 -14  -3   0    0.20    2.90
 -14  -3   0    1.50    2.60
  14  -3   0    1.00    2.00
 -14   3   0   -2.80    3.30
 -14   3   0    2.40    3.10
 -14   3   0    2.80    3.70
  14   3   0   -3.00    2.70
 -15  -3   0   34.20    4.80
 -15  -3   0   29.90    4.60
 -15   3   0   34.50    5.30
 -15   3   0   28.50    5.20
 -15   3   0   43.20    5.80
  15   3   0   37.60    4.70
 -16  -3   0   -2.60    3.80
 -16  -3   0    0.30    3.70
 -16   3   0    1.80    4.50
  16   3   0    4.10    3.90
 -16   3   0    2.00    4.60
  16   3   0   -5.30    7.00
   0  -4   0   69.39    3.60
   0  -4   0   73.39    3.10
   0  -4   0   72.29    3.30
   0  -4   0   71.19    3.10
   0  -4   0   75.99    3.20
   0   4   0   67.39    3.50
   0   4   0   74.99    3.30
   0   4   0   75.29    3.30
   0   4   0   72.39    2.20
   0   4   0   70.19    2.20
   0   4   0   73.99    3.00
   1  -4   0    4.20    1.40
   1  -4   0    3.80    1.10
  -1  -4   0    4.40    1.70
   1  -4   0    5.10    0.50
  -1  -4   0    3.80    1.10
   1  -4   0    2.70    1.10
  -1  -4   0    5.00    0.50
  -1  -4   0    2.30    0.90
   1  -4   0    2.80    1.00
   1  -4   0    5.20    0.70
  -1  -4   0    2.70    1.00
   1  -4   0    4.40    1.40
  -1  -4   0    5.00    1.10
  -1   4   0    3.80    1.30
  -1   4   0    5.70    0.70
   1   4   0    4.70    0.60
  -1   4   0    3.60    1.20
   1   4   0    4.80    1.10
   1   4   0    4.80    1.10
   1   4   0    3.20    1.00
   1   4   0    4.30    1.50
  -1   4   0    3.30    0.50
  -1   4   0    2.70    1.00
  -2  -4   0  347.07   11.00
   2  -4   0  350.66   11.00
  -2  -4   0  340.07    9.40
   2  -4   0  357.86   10.40
  -2  -4   0  347.57   10.00
   2  -4   0  348.37   10.40
  -2  -4   0  354.56    9.40
  -2  -4   0  351.96   10.40
   2  -4   0  350.16    9.60
   2  -4   0  345.77   10.60
   2  -4   0  346.77    9.60
  -2   4   0  339.67   10.50
   2   4   0  352.76    9.40
   2   4   0  337.77   10.90
  -2   4   0  351.36   10.40
   2   4   0  353.76    9.40
  -2   4   0  351.36    9.50
   2   4   0  349.07   10.20
   2   4   0  327.47   10.40
   3  -4   0  129.19    5.00
  -3  -4   0  127.99    4.00
   3  -4   0  124.99    4.20
   3  -4   0  133.29    4.50
   3  -4   0  127.69    5.40
  -3  -4   0  131.59    5.60
   3  -4   0  129.29    4.20
   3  -4   0  127.99    5.00
  -3  -4   0  133.49    4.60
  -3  -4   0  133.29    4.90
  -3  -4   0  130.59    4.00
   3  -4   0  132.49    5.00
   3   4   0  134.29    4.10
  -3   4   0  123.29    4.70
   3   4   0  126.29    5.40
   3   4   0  132.19    4.00
  -3   4   0  126.69    4.10
  -3   4   0  123.49    4.90
  -3   4   0  124.59    4.80
   3   4   0  125.29    4.90
  -3   4   0  130.59    4.20
  -4  -4   0    3.80    1.20
   4  -4   0    4.40    1.00
   4  -4   0    3.10    0.90
   4  -4   0    4.40    1.40
  -4  -4   0    5.70    0.90
  -4  -4   0    3.70    2.00
  -4  -4   0    4.90    1.20
  -4  -4   0    3.70    1.40
   4  -4   0    4.50    1.40
  -4  -4   0    4.20    0.80
  -4   4   0    7.20    1.60
   4   4   0    6.40    1.50
  -4   4   0    4.80    1.40
   4   4   0    4.40    0.90
  -4   4   0    4.10    0.90
   4   4   0    6.00    0.90
   4   4   0    7.00    1.10
  -4   4   0    3.70    1.40
   4   4   0    3.10    1.70
  -4   4   0    7.00    1.10
   5  -4   0 1404.56   38.40
  -5  -4   0 1384.06   37.60
   5  -4   0 1433.76   37.80
  -5  -4   0 1437.96   38.40
  -5  -4   0 1401.46   37.60
   5  -4   0 1412.46   37.80
   5  -4   0 1468.35   38.60
  -5   4   0 1436.76   38.50
   5   4   0 1381.36   37.30
  -5   4   0 1424.26   38.40
   5   4   0 1414.16   39.20
   5   4   0 1390.76   37.50
  -5   4   0 1403.86   37.80
  -5   4   0 1449.46   38.50
   5   4   0 1380.96   38.30
   5   4   0 1443.26   37.60
   6  -4   0   87.79    4.60
   6  -4   0   88.69    3.90
  -6  -4   0   89.29    3.70
   6  -4   0   81.89    4.30
   6  -4   0   85.19    3.90
  -6  -4   0   86.29    3.70
  -6  -4   0   83.19    4.30
  -6   4   0   87.99    4.50
  -6   4   0   79.69    4.20
   6   4   0   88.59    3.10
  -6   4   0   91.39    3.80
  -6   4   0   85.29    4.60
   6   4   0   84.89    5.20
  -6   4   0   82.09    4.30
   6   4   0   88.79    3.70
   6   4   0   90.79    3.70
   6   4   0   88.79    4.30
   7  -4   0   25.90    3.30
   7  -4   0   27.60    2.70
  -7  -4   0   27.00    2.40
  -7  -4   0   29.90    2.50
   7  -4   0   29.50    3.00
  -7  -4   0   27.70    3.20
   7  -4   0   30.90    2.80
  -7   4   0   33.60    3.20
  -7   4   0   28.00    2.60
   7   4   0   26.60    2.90
   7   4   0   26.10    3.80
   7   4   0   32.20    2.60
   7   4   0   29.90    1.60
  -7   4   0   28.00    3.00
  -7   4   0   29.00    3.30
  -7   4   0   25.90    2.50
   7   4   0   26.00    2.40
   8  -4   0  242.78    9.20
  -8  -4   0  251.57    8.30
   8  -4   0  235.08    8.70
  -8  -4   0  243.48   10.70
   8  -4   0  245.88    8.50
   8  -4   0  261.77    8.60
  -8  -4   0  225.78    8.90
  -8  -4   0  249.28    8.30
   8   4   0  248.38    8.80
  -8   4   0  246.48    9.10
   8   4   0  241.38    8.70
  -8   4   0  248.58    9.20
  -8   4   0  255.97    8.40
  -8   4   0  246.78    8.80
   8   4   0  239.08    8.20
  -8   4   0  245.58    8.50
   8   4   0  238.48   10.10
  -9  -4   0    3.20    1.70
  -9  -4   0    4.60    2.60
  -9  -4   0    4.60    1.80
   9  -4   0    3.40    2.10
   9  -4   0    6.70    2.60
   9  -4   0    2.50    2.00
   9  -4   0    1.60    1.90
   9   4   0    7.50    3.70
  -9   4   0    3.50    2.60
  -9   4   0    4.20    1.90
  -9   4   0    4.70    2.20
   9   4   0    2.50    2.00
  -9   4   0    2.20    1.70
  10  -4   0  165.28    7.90
 -10  -4   0  160.58    6.80
  10  -4   0  146.09    7.00
 -10  -4   0  159.48    6.80
  10  -4   0  166.18    8.10
  10  -4   0  160.48    7.00
  10  -4   0  163.18    5.80
  10   4   0  165.28    7.20
 -10   4   0  176.08    9.20
 -10   4   0  153.18    7.40
  10   4   0  169.98    9.20
 -10   4   0  159.38    7.00
  11  -4   0   46.70    4.60
  11  -4   0   39.90    2.90
  11  -4   0   44.70    4.90
 -11  -4   0   38.40    4.30
 -11  -4   0   28.10    3.90
  11  -4   0   43.30    4.90
  11   4   0   49.10    6.30
 -11   4   0   37.40    5.50
 -11   4   0   41.10    4.40
 -11   4   0   44.70    4.30
  11   4   0   34.70    4.40
 -12  -4   0   19.10    3.20
 -12  -4   0   23.90    3.40
  12  -4   0   19.90    2.60
  12  -4   0   19.80    4.10
  12  -4   0   28.50    3.90
 -12   4   0   26.00    3.70
 -12   4   0   23.30    3.40
  12   4   0   32.70    6.10
  12   4   0   17.30    3.60
 -12   4   0   19.90    3.80
  13  -4   0    9.10    3.80
 -13  -4   0    6.40    2.90
 -13  -4   0    5.40    2.80
  13  -4   0    6.60    1.80
 -13   4   0    6.50    3.20
 -13   4   0    3.50    3.30
 -13   4   0    6.70    3.20
  13   4   0   -3.20    4.90
 -14  -4   0    4.70    2.90
  14  -4   0   -1.30    4.00
 -14  -4   0    7.60    3.30
 -14   4   0   -5.20    3.50
  14   4   0    1.10    3.40
 -14   4   0   -1.50    4.00
 -14   4   0   -6.00    3.30
  14   4   0   -1.50    5.70
 -15  -4   0   13.80    4.20
 -15  -4   0   11.70    4.10
 -15   4   0   20.10    4.80
  15   4   0   20.60    4.40
  15   4   0   14.80    6.70
 -15   4   0   10.60    4.70
 -16  -4   0    6.00    4.30
 -16  -4   0   14.10    4.40
  16   4   0    5.30    6.80
 -16   4   0    1.60    5.20
 -16   4   0    8.00    4.90
  16   4   0    3.80    4.50
   0  -5   0    9.50    1.50
   0  -5   0    6.90    1.50
   0  -5   0    3.80    1.80
   0  -5   0    6.60    1.30
   0   5   0    6.80    1.30
   0   5   0    8.90    0.70
   0   5   0    3.70    1.70
   0   5   0    6.10    1.20
  -1  -5   0  979.60   26.80
  -1  -5   0  969.90   26.40
   1  -5   0  975.90   26.70
   1  -5   0  985.00   25.50
  -1  -5   0  989.70   26.90
   1  -5   0  969.90   26.80
  -1  -5   0  943.31   25.40
   1  -5   0  979.50   27.50
  -1  -5   0 1019.80   27.70
   1  -5   0 1006.30   26.60
   1  -5   0  983.00   27.10
  -1  -5   0  968.10   26.80
  -1   5   0  970.10   26.60
   1   5   0  953.50   26.80
   1   5   0  978.40   25.40
  -1   5   0  957.20   26.90
   1   5   0  990.60   26.60
  -1   5   0  967.50   25.30
   1   5   0  964.60   27.50
  -1   5   0  966.80   25.50
  -1   5   0  979.70   27.60
   1   5   0  975.70   26.70
   1   5   0  945.31   25.40
   2  -5   0  128.19    4.00
   2  -5   0  128.39    5.20
  -2  -5   0  128.09    5.10
  -2  -5   0  131.49    5.80
  -2  -5   0  126.29    3.80
   2  -5   0  129.19    5.00
  -2  -5   0  126.29    5.00
   2  -5   0  121.59    4.10
  -2  -5   0  131.99    4.70
   2  -5   0  140.29    6.00
   2  -5   0  126.79    5.40
   2  -5   0  128.99    4.80
  -2   5   0  120.89    5.20
   2   5   0  120.89    5.60
  -2   5   0  135.09    4.00
  -2   5   0  129.09    5.00
  -2   5   0  125.39    3.80
   2   5   0  128.39    4.80
   2   5   0  120.79    5.10
   2   5   0  130.69    3.60
  -2   5   0  130.79    4.90
   2   5   0  126.89    3.80
   2   5   0  127.69    3.70
   3  -5   0   30.40    2.80
   3  -5   0   32.60    3.30
  -3  -5   0   24.10    2.60
   3  -5   0   31.20    1.80
  -3  -5   0   33.70    2.50
   3  -5   0   30.30    1.80
   3  -5   0   29.50    2.30
  -3  -5   0   29.60    2.30
   3  -5   0   31.90    2.80
  -3  -5   0   27.30    1.60
  -3  -5   0   30.50    3.40
  -3  -5   0   27.10    1.60
   3  -5   0   26.70    2.70
  -3   5   0   32.20    1.80
  -3   5   0   29.00    2.80
   3   5   0   30.70    1.60
   3   5   0   26.80    3.20
  -3   5   0   33.30    1.70
  -3   5   0   28.90    2.50
  -3   5   0   24.50    2.50
   3   5   0   27.60    2.70
   3   5   0   32.40    2.30
   3   5   0   30.20    1.50
  -4  -5   0    0.90    1.20
  -4  -5   0    0.60    1.40
   4  -5   0    2.30    1.20
   4  -5   0    1.60    1.50
   4  -5   0    0.60    1.80
  -4  -5   0    0.20    0.70
   4  -5   0    3.00    1.60
  -4  -5   0   -0.30    2.20
  -4  -5   0   -1.60    1.60
   4  -5   0    3.10    1.50
  -4  -5   0    1.20    0.80
   4   5   0   -0.30    1.30
   4   5   0    0.40    0.80
  -4   5   0    2.50    1.40
  -4   5   0    1.10    0.80
   4   5   0    0.40    0.80
  -4   5   0    1.00    1.40
  -4   5   0    1.30    0.90
  -4   5   0    2.60    1.40
   4   5   0    1.10    1.90
   4   5   0    0.70    1.10
  -5  -5   0   30.70    2.10
   5  -5   0   29.60    2.40
  -5  -5   0   29.90    2.00
   5  -5   0   31.60    3.20
   5  -5   0   32.40    3.10
   5  -5   0   32.70    2.30
  -5  -5   0   27.10    3.00
  -5  -5   0   32.80    2.70
   5  -5   0   30.60    2.30
  -5   5   0   35.50    2.40
  -5   5   0   28.30    2.90
   5   5   0   31.90    3.80
   5   5   0   27.50    2.10
  -5   5   0   29.00    2.20
   5   5   0   30.80    2.20
   5   5   0   30.40    2.00
  -5   5   0   35.70    3.20
   5   5   0   30.30    2.90
  -5   5   0   30.30    3.10
   6  -5   0    0.40    1.70
   6  -5   0    1.30    1.20
   6  -5   0    1.60    1.30
  -6  -5   0    2.70    1.90
  -6  -5   0    1.10    1.10
  -6  -5   0   -0.70    1.40
   6  -5   0    1.30    1.30
   6  -5   0    0.70    1.90
  -6  -5   0    1.70    1.10
   6   5   0    3.10    1.20
   6   5   0   -1.60    2.30
   6   5   0   -0.60    0.90
   6   5   0    1.70    1.70
  -6   5   0    1.20    1.80
  -6   5   0    0.00    1.70
  -6   5   0    0.80    1.20
   6   5   0    1.30    1.10
  -6   5   0   -1.40    0.90
  -6   5   0   -0.80    1.70
  -7  -5   0   85.09    3.90
   7  -5   0   80.49    4.70
   7  -5   0   75.29    4.80
  -7  -5   0   81.89    3.80
   7  -5   0   82.59    5.00
   7  -5   0   83.79    4.20
  -7  -5   0   85.19    4.90
  -7   5   0   87.49    4.10
  -7   5   0   77.09    4.90
   7   5   0   84.69    3.20
   7   5   0   81.19    4.70
  -7   5   0   79.09    4.80
  -7   5   0   84.69    4.00
  -7   5   0   81.99    4.80
   7   5   0   78.89    6.10
   7   5   0   75.49    3.90
   8  -5   0  154.98    6.20
  -8  -5   0  145.49    5.80
  -8  -5   0  146.69    5.90
   8  -5   0  147.49    6.20
   8  -5   0  147.59    7.00
  -8   5   0  142.09    5.90
   8   5   0  137.39    7.90
  -8   5   0  144.49    6.00
  -8   5   0  141.09    6.60
   8   5   0  136.79    4.60
   8   5   0  149.29    6.60
  -8   5   0  157.18    7.00
  -8   5   0  149.39    6.90
  -9  -5   0  239.38    8.50
   9  -5   0  247.78    9.00
   9  -5   0  238.68    8.90
   9  -5   0  248.78    9.90
  -9  -5   0  254.37    8.70
   9   5   0  237.88   10.80
  -9   5   0  239.18    8.70
   9   5   0  244.88    9.30
  -9   5   0  243.68    9.60
  -9   5   0  226.48    9.70
  -9   5   0  249.68    8.70
  10  -5   0  117.19    6.20
  10  -5   0  111.39    6.10
 -10  -5   0  119.39    5.80
 -10  -5   0  123.19    5.80
  10  -5   0  128.39    7.20
 -10   5   0  122.09    6.00
  10   5   0  124.59    6.60
 -10   5   0  122.39    7.00
 -10   5   0  112.49    6.00
  10   5   0  121.49    8.10
 -11  -5   0   27.00    3.40
  11  -5   0   21.70    2.80
  11  -5   0   26.60    3.90
  11  -5   0   24.20    4.20
 -11  -5   0   28.10    3.40
  11   5   0   23.40    5.00
 -11   5   0   32.20    4.50
 -11   5   0   27.90    3.90
  11   5   0   26.90    3.70
 -11   5   0   19.20    3.20
  12  -5   0   29.40    4.80
  12  -5   0   28.30    2.80
 -12  -5   0   26.90    3.70
 -12  -5   0   34.00    3.90
  12  -5   0   28.50    4.60
  12   5   0   37.30    6.40
 -12   5   0   27.30    3.60
 -12   5   0   29.60    4.10
  12   5   0   31.70    4.20
 -12   5   0   40.80    5.50
 -13  -5   0    1.40    2.80
  13  -5   0   -5.00    3.90
 -13  -5   0    0.00    3.00
 -13   5   0    5.10    3.20
 -13   5   0    3.80    3.60
  13   5   0    3.20    5.40
  13   5   0    9.20    3.50
  14  -5   0   13.10    5.00
 -14  -5   0   16.80    3.80
 -14  -5   0   18.20    4.00
 -14   5   0   20.80    4.70
  14   5   0   14.20    6.00
 -14   5   0   25.90    4.60
  14   5   0   11.00    4.20
 -15  -5   0    2.20    3.80
 -15  -5   0    0.10    3.60
  15  -5   0   -2.30    5.10
 -15   5   0   -3.30    4.70
  15   5   0    5.00    6.70
 -15   5   0    5.40    4.60
  15   5   0    5.80    4.30
 -16  -5   0    1.30    4.40
 -16  -5   0   13.40    4.80
 -16   5   0    8.00    5.70
  16   5   0   16.80    5.10
 -16   5   0   10.30    5.80
  16   5   0   21.00    8.70
   0  -6   0 1606.24   43.80
   0  -6   0 1564.74   42.70
   0  -6   0 1595.04   43.00
   0  -6   0 1629.54   42.60
   0  -6   0 1556.44   43.10
   0   6   0 1574.84   42.90
   0   6   0 1562.44   43.70
   0   6   0 1595.64   42.70
   1  -6   0  933.01   27.20
   1  -6   0  954.60   26.20
  -1  -6   0  939.91   26.30
   1  -6   0  973.50   26.10
  -1  -6   0  930.21   25.90
  -1  -6   0  938.01   26.50
   1  -6   0  936.41   26.40
  -1  -6   0  931.01   26.40
   1  -6   0  939.61   26.60
   1   6   0  957.00   26.50
   1   6   0  921.81   27.10
  -1   6   0  958.50   24.80
  -1   6   0  956.80   26.50
  -1   6   0  956.80   26.20
  -1   6   0  945.71   24.70
   1   6   0  945.21   26.30
  -1   6   0  909.91   27.20
   1   6   0  943.81   26.10
   2  -6   0  345.27   11.60
   2  -6   0  353.26   11.20
   2  -6   0  354.26   11.40
  -2  -6   0  347.17    9.60
  -2  -6   0  356.96   12.30
  -2  -6   0  347.77   11.30
   2  -6   0  355.66   12.20
  -2  -6   0  354.06   11.30
  -2  -6   0  361.96   10.80
   2  -6   0  367.06   11.00
  -2  -6   0  363.86   11.40
   2  -6   0  355.26   10.00
  -2   6   0  372.86   10.00
   2   6   0  356.06   11.10
   2   6   0  343.47   11.40
   2   6   0  354.66    9.70
  -2   6   0  366.96   11.10
  -2   6   0  353.46   11.50
  -2   6   0  360.46    9.70
   2   6   0  349.07   12.20
  -2   6   0  353.36    9.80
   2   6   0  353.86    9.70
  -2   6   0  363.36    9.60
  -2   6   0  359.76   11.20
  -3  -6   0   17.10    2.50
  -3  -6   0   24.20    3.80
  -3  -6   0   19.70    2.70
  -3  -6   0   20.80    2.40
   3  -6   0   24.80    2.50
  -3  -6   0   24.70    1.50
   3   6   0   27.80    3.00
  -3   6   0   27.10    2.90
  -3   6   0   28.40    2.70
   3   6   0   22.40    2.50
   3   6   0   24.90    1.50
   3   6   0   27.00    3.60
   3   6   0   21.80    1.30
   4  -6   0   61.49    2.90
   4  -6   0   59.59    4.40
  -4  -6   0   53.89    3.30
  -4  -6   0   52.79    5.00
  -4  -6   0   45.50    4.00
   4  -6   0   59.99    2.90
  -4  -6   0   56.59    3.60
   4  -6   0   62.99    4.20
  -4  -6   0   54.49    2.40
   4  -6   0   63.39    3.40
  -4  -6   0   52.09    2.50
   4   6   0   58.19    4.00
  -4   6   0   66.79    2.70
   4   6   0   54.19    3.20
   4   6   0   51.39    2.50
  -4   6   0   60.99    3.70
   4   6   0   56.69    2.40
   4   6   0   54.29    4.70
  -5  -6   0   53.59    2.60
  -5  -6   0   44.90    3.90
   5  -6   0   60.29    3.30
  -5  -6   0   52.59    3.30
  -5  -6   0   51.29    2.70
   5  -6   0   48.50    4.10
   5  -6   0   44.10    4.20
   5  -6   0   52.59    3.00
  -5  -6   0   47.50    5.30
   5  -6   0   47.60    4.80
   5  -6   0   50.79    3.00
  -5   6   0   55.29    2.80
   5   6   0   51.09    4.80
   5   6   0   49.10    3.00
  -5   6   0   59.79    4.10
   5   6   0   50.49    4.00
   5   6   0   51.89    2.60
  -5   6   0   53.19    4.10
  -5   6   0   56.09    3.90
   5   6   0   53.99    2.70
  -5   6   0   54.99    2.90
   6  -6   0    1.40    1.50
  -6  -6   0    1.30    1.10
   6  -6   0    1.30    1.70
   6  -6   0    1.50    1.40
   6  -6   0    0.00    2.20
  -6  -6   0    1.60    1.20
  -6  -6   0    1.80    1.80
   6   6   0    1.60    1.30
  -6   6   0    1.90    1.20
   6   6   0    0.70    2.00
   6   6   0    3.40    3.00
   6   6   0   -0.50    1.20
  -6   6   0    0.70    1.40
  -6   6   0    4.30    2.10
  -6   6   0   -1.30    1.80
  -6   6   0    0.60    2.00
   7  -6   0   10.90    2.20
  -7  -6   0   12.60    2.30
   7  -6   0   11.30    2.10
  -7  -6   0   12.80    1.90
   7  -6   0   11.90    1.90
  -7  -6   0   11.00    1.80
   7  -6   0   10.80    2.90
  -7   6   0   12.20    2.90
   7   6   0   15.20    1.90
   7   6   0   10.40    2.20
   7   6   0   18.00    3.10
   7   6   0   13.20    3.80
  -7   6   0   12.80    2.90
  -7   6   0   12.40    2.80
  -7   6   0   13.60    2.10
  -7   6   0   12.30    1.80
  -8  -6   0  293.07   10.30
   8  -6   0  303.67   11.30
   8  -6   0  295.87   10.10
  -8  -6   0  300.37    9.80
   8  -6   0  293.07    9.40
  -8  -6   0  307.77    9.90
   8  -6   0  315.97   10.30
  -8   6   0  296.17   11.10
   8   6   0  301.97   11.10
  -8   6   0  322.37   10.10
   8   6   0  306.07   12.30
  -8   6   0  299.27   11.10
  -8   6   0  291.67   11.10
   8   6   0  296.77    8.90
  -9  -6   0   15.60    2.40
   9  -6   0    7.70    2.60
   9  -6   0    7.50    2.00
   9  -6   0   10.70    2.60
  -9  -6   0    9.10    2.70
   9  -6   0   11.90    3.50
  -9   6   0   10.30    2.40
   9   6   0   14.40    3.30
   9   6   0    9.70    1.40
  -9   6   0    6.30    3.30
  -9   6   0   11.10    2.50
  -9   6   0   10.60    3.30
   9   6   0    7.60    3.80
  10  -6   0    3.60    2.50
 -10  -6   0    1.10    2.10
  10  -6   0   -1.70    2.80
  10  -6   0    0.60    1.80
 -10  -6   0    1.70    1.90
  10  -6   0   -0.70    3.10
  10   6   0   -3.80    3.90
  10   6   0    0.10    3.10
 -10   6   0    2.60    2.20
 -10   6   0   -0.90    2.90
 -10   6   0    4.00    2.60
  11  -6   0   82.09    7.20
 -11  -6   0   71.29    5.20
 -11  -6   0   84.29    5.30
 -11   6   0   79.59    5.80
  11   6   0   71.09    7.80
 -11   6   0   80.69    6.50
  11   6   0   61.39    6.10
 -12  -6   0   18.50    3.40
 -12  -6   0   12.80    3.10
  12  -6   0   12.20    6.80
  12   6   0   17.00    4.00
 -12   6   0   15.80    4.10
  12   6   0   26.90    6.00
 -12   6   0   12.50    3.80
  13  -6   0   13.20    4.60
 -13  -6   0    9.80    3.10
 -13  -6   0   11.10    3.40
 -13   6   0    3.80    3.90
  13   6   0    7.50    4.00
 -13   6   0    5.00    3.70
  13   6   0   14.30    6.00
 -14  -6   0   34.40    4.80
 -14  -6   0   30.70    4.50
  14  -6   0   28.20    6.20
 -14   6   0   25.00    5.30
  14   6   0   38.80    5.50
 -14   6   0   16.40    5.10
  14   6   0   36.70    7.80
 -15  -6   0    0.60    4.00
  15  -6   0   -3.40    5.70
 -15  -6   0   -4.40    3.90
 -15   6   0    2.70    5.30
  15   6   0   -9.60    4.30
  15   6   0    7.20    7.10
 -15   6   0   -9.50    4.80
   0  -7   0   11.90    3.20
   0  -7   0    4.60    1.90
   0  -7   0    9.00    2.20
   0  -7   0    6.80    1.90
   0  -7   0   12.30    2.50
   0   7   0   11.90    2.30
   0   7   0   19.70    3.30
   1  -7   0  350.16   11.10
   1  -7   0  327.97   11.30
  -1  -7   0  349.57   12.50
   1  -7   0  322.17   12.20
   1  -7   0  349.07   11.10
  -1  -7   0  353.06   11.40
  -1  -7   0  334.47   11.50
  -1  -7   0  337.47   11.30
  -1  -7   0  349.57   10.90
   1  -7   0  324.07   11.60
   1   7   0  358.26   11.20
  -1   7   0  347.87   12.40
  -1   7   0  343.07   11.50
   1   7   0  351.66   11.30
   1   7   0  326.97   12.20
  -1   7   0  339.37   11.10
   2  -7   0  272.47    9.40
  -2  -7   0  277.67   11.00
   2  -7   0  290.97   10.00
   2  -7   0  263.37   10.60
   2  -7   0  276.37    7.90
   2  -7   0  285.37    9.70
  -2  -7   0  270.87    9.10
  -2  -7   0  284.87    9.90
  -2  -7   0  277.37    9.80
  -2  -7   0  269.47    9.70
   2  -7   0  262.77   10.10
   2   7   0  284.17    7.60
  -2   7   0  291.47    8.10
  -2   7   0  279.47    7.90
   2   7   0  279.67   10.00
   2   7   0  284.27   10.70
  -2   7   0  279.57    9.60
   2   7   0  292.07    9.60
  -2   7   0  288.97   10.10
  -3  -7   0  128.99    7.30
   3  -7   0  126.79    5.60
  -3  -7   0  129.69    5.30
   3  -7   0  130.59    4.50
   3  -7   0  130.39    6.10
   3  -7   0  133.79    6.30
  -3  -7   0  134.49    6.00
  -3  -7   0  126.69    6.00
  -3  -7   0  129.19    4.10
   3   7   0  130.89    6.90
  -3   7   0  132.19    6.00
  -3   7   0  132.79    4.60
  -3   7   0  127.99    6.20
   3   7   0  127.79    4.10
  -3   7   0  131.89    5.70
  -3   7   0  125.89    4.20
   3   7   0  124.99    5.50
  -3   7   0  128.39    4.00
   3   7   0  127.69    6.20
  -4  -7   0  327.17   10.30
  -4  -7   0  310.17   10.70
   4  -7   0  321.47    9.40
  -4  -7   0  321.67    9.20
   4  -7   0  335.67   11.40
   4  -7   0  313.07   10.30
   4   7   0  312.37    9.20
  -4   7   0  338.87   11.10
   4   7   0  315.67   10.30
  -4   7   0  330.57    9.20
  -4   7   0  317.17   10.60
   4   7   0  307.37    8.90
   4   7   0  311.87   12.00
   4   7   0  316.37   11.20
  -4   7   0  304.97    9.50
  -4   7   0  325.77    9.50
  -4   7   0  329.67   11.40
  -5  -7   0   14.50    2.30
   5  -7   0   14.40    2.30
   5  -7   0   15.60    2.00
  -5  -7   0   18.60    3.00
  -5  -7   0   14.20    1.90
   5  -7   0   12.30    1.90
   5  -7   0   12.30    3.00
  -5  -7   0   16.30    1.60
  -5   7   0   13.40    1.80
  -5   7   0   18.20    2.70
   5   7   0   18.40    2.40
   5   7   0   16.90    3.80
  -5   7   0   15.10    3.00
   5   7   0   12.60    2.70
  -5   7   0   12.10    1.60
   5   7   0   16.00    2.10
  -5   7   0   12.50    2.60
  -6  -7   0  101.89    4.00
   6  -7   0   96.59    6.10
   6  -7   0  101.99    4.70
   6  -7   0  100.09    4.50
   6  -7   0   97.99    4.50
  -6  -7   0   93.39    4.10
  -6  -7   0   96.59    4.90
   6   7   0   92.39    4.20
  -6   7   0   90.39    4.10
  -6   7   0   92.09    5.90
  -6   7   0   94.79    5.70
   6   7   0  100.19    5.90
  -6   7   0  100.59    4.50
  -6   7   0   98.59    5.60
   6   7   0   94.19    4.40
   6   7   0   89.99    6.80
   7  -7   0    6.30    2.10
  -7  -7   0    9.80    2.40
   7  -7   0    4.90    2.00
   7  -7   0    9.80    2.20
  -7  -7   0    5.60    1.80
  -7  -7   0    8.70    1.80
   7  -7   0    9.40    3.20
   7   7   0    7.20    3.60
  -7   7   0    6.10    3.10
  -7   7   0    8.10    2.90
   7   7   0    2.80    2.50
   7   7   0    5.00    1.80
  -7   7   0    7.10    2.10
  -7   7   0    6.00    2.80
  -7   7   0    5.20    1.80
   8  -7   0  275.37    9.10
  -8  -7   0  265.27    9.70
   8  -7   0  283.17    9.70
  -8  -7   0  291.27    9.10
   8  -7   0  284.87   11.10
   8  -7   0  279.57    9.70
  -8   7   0  222.88   12.50
   8   7   0  267.17    8.60
  -8   7   0  281.37    9.40
   8   7   0  270.47   12.00
  -8   7   0  274.37    9.50
  -8   7   0  279.87   11.90
  -9  -7   0   61.29    4.10
   9  -7   0   60.89    6.20
   9  -7   0   56.99    4.00
   9  -7   0   57.99    5.30
   9  -7   0   57.59    4.80
  -9  -7   0   52.39    4.10
  -9  -7   0   47.70    5.00
  -9   7   0   50.49    5.70
   9   7   0   63.09    6.80
   9   7   0   52.99    3.10
  -9   7   0   52.79    4.60
  -9   7   0   63.29    5.70
   9   7   0   65.69    5.70
  -9   7   0   57.09    6.60
  10  -7   0   76.79    6.90
 -10  -7   0   67.09    6.80
 -10  -7   0   68.89    4.90
 -10  -7   0   77.69    4.80
  10   7   0   80.99    6.40
  10   7   0   76.49    7.90
 -10   7   0   80.39    6.60
 -10   7   0   62.39    5.30
 -11  -7   0   18.10    3.10
  11  -7   0   16.00    4.50
 -11  -7   0   16.20    3.10
  11   7   0   24.50    6.00
  11   7   0   16.90    4.20
 -11   7   0   12.50    3.50
 -11   7   0   14.90    4.10
 -12  -7   0    7.20    3.00
  12  -7   0    5.80    4.30
 -12  -7   0    6.20    3.10
  12   7   0    5.80    5.80
 -12   7   0   -5.10    3.50
  12   7   0    4.40    3.80
 -12   7   0    2.20    3.90
  13  -7   0    7.30    5.00
 -13  -7   0    3.30    3.10
 -13  -7   0    4.70    3.30
  13   7   0   -1.30    4.10
  13   7   0   -2.20    6.30
 -13   7   0    8.90    4.60
  14  -7   0    9.90    6.20
 -14  -7   0   -6.50    3.50
 -14  -7   0    9.70    3.80
 -14   7   0    1.10    4.90
  14   7   0   -4.40    6.40
  14   7   0    5.00    4.60
   0  -8   0  875.21   25.40
   0  -8   0  838.62   24.70
   0   8   0  865.61   26.40
   0   8   0  872.01   25.00
   0   8   0  873.01   25.30
   1  -8   0  258.57   10.10
   1  -8   0  282.37   10.90
  -1  -8   0  267.37    9.60
   1  -8   0  264.47    9.80
  -1  -8   0  280.07   10.30
  -1   8   0  280.37   10.30
   1   8   0  276.47   10.00
   1   8   0  259.57    9.80
   1   8   0  285.87   11.30
  -1   8   0  290.07   10.00
  -2  -8   0  133.79    6.80
  -2  -8   0  137.59    6.10
   2  -8   0  148.99    6.40
  -2  -8   0  130.09    6.90
  -2   8   0  142.19    6.50
   2   8   0  132.19    7.70
  -2   8   0  134.49    4.40
  -2   8   0  134.19    4.20
   2   8   0  137.99    6.40
  -3  -8   0  526.35   16.20
  -3  -8   0  537.45   17.30
  -3  -8   0  517.25   16.90
   3  -8   0  549.85   14.90
   3  -8   0  530.05   16.40
   3  -8   0  556.84   17.40
   3   8   0  526.05   14.60
   3   8   0  544.65   18.30
   3   8   0  551.94   16.60
  -3   8   0  546.45   15.10
  -3   8   0  583.64   17.60
  -3   8   0  551.14   17.00
   3   8   0  534.75   14.50
  -3   8   0  544.75   14.90
   3   8   0  538.35   17.40
  -4  -8   0   15.30    1.80
  -4  -8   0   14.90    2.60
   4  -8   0   14.80    1.70
  -4  -8   0   17.60    3.40
  -4  -8   0   10.10    3.00
   4  -8   0   15.90    2.80
   4  -8   0   14.80    2.00
   4  -8   0   17.00    3.60
   4   8   0   19.60    2.90
  -4   8   0   22.50    3.70
  -4   8   0   16.20    1.80
  -4   8   0   17.30    2.20
   4   8   0   14.80    2.00
  -4   8   0   21.20    3.00
   4   8   0   21.20    4.60
   4   8   0   18.90    3.40
   5  -8   0   -0.80    2.20
  -5  -8   0    6.30    2.20
   5  -8   0    6.40    1.70
   5  -8   0    5.30    3.10
  -5  -8   0   -1.10    2.80
  -5  -8   0    2.70    1.30
   5  -8   0    7.70    2.00
   5   8   0    6.50    3.90
   5   8   0    2.40    1.20
   5   8   0   -0.80    2.40
  -5   8   0    0.10    2.50
  -5   8   0    4.50    1.60
   5   8   0    4.50    2.20
  -5   8   0    6.60    2.80
  -5   8   0    4.20    2.60
   5   8   0    2.40    1.50
  -5   8   0    5.60    1.50
   6  -8   0  174.18    8.50
  -6  -8   0  180.08    5.80
   6  -8   0  170.68    7.10
  -6  -8   0  175.08    7.30
  -6  -8   0  182.48    6.10
   6  -8   0  178.08    6.50
  -6   8   0  180.68    8.30
   6   8   0  183.68    9.50
  -6   8   0  179.58    8.60
   6   8   0  174.48    6.90
  -6   8   0  170.08    7.80
   6   8   0  174.88    8.40
  -6   8   0  174.38    6.20
  -6   8   0  177.48    6.50
   7  -8   0  568.94   16.90
   7  -8   0  564.44   16.70
   7  -8   0  597.44   18.80
  -7  -8   0  579.24   16.10
   7  -8   0  538.65   16.80
  -7  -8   0  549.85   16.30
  -7  -8   0  544.05   17.10
  -7   8   0  561.24   16.70
  -7   8   0  581.54   18.10
   7   8   0  561.64   19.60
   7   8   0  559.64   16.70
  -7   8   0  582.14   18.90
   7   8   0  567.04   18.60
  -7   8   0  595.34   18.60
  -8  -8   0    1.10    2.90
   8  -8   0    3.70    3.60
  -8  -8   0    4.20    2.00
  -8  -8   0    1.70    1.80
   8  -8   0   -1.00    2.20
   8  -8   0    1.70    2.50
  -8   8   0   -3.00    1.90
   8   8   0   -1.10    1.80
   8   8   0    4.30    3.40
   8   8   0    6.10    4.10
  -8   8   0    0.70    3.20
  -8   8   0    4.10    3.00
  -9  -8   0  125.19    5.70
   9  -8   0  118.09    8.00
  -9  -8   0  128.19    5.90
  -9   8   0  130.99    8.20
   9   8   0  120.39    7.90
   9   8   0  110.79    5.00
  -9   8   0  125.59    6.30
  -9   8   0  128.69    7.90
   9   8   0  119.69    9.00
 -10  -8   0    9.20    2.60
  10  -8   0    7.30    4.40
 -10  -8   0   10.20    2.70
  10   8   0    8.30    5.80
  10   8   0   12.40    3.90
 -10   8   0    6.30    3.90
  11  -8   0   35.30    5.50
 -11  -8   0   21.00    3.40
 -11  -8   0   23.00    3.50
  11   8   0   28.60    6.80
 -11   8   0   23.10    5.10
  11   8   0   15.60    4.60
 -12  -8   0    1.00    3.10
  12  -8   0    2.30    4.90
 -12  -8   0    4.60    2.90
  12   8   0    9.00    6.40
 -12   8   0    3.80    4.60
  12   8   0    0.80    4.30
 -13  -8   0   -0.90    3.50
 -13  -8   0   -0.10    3.40
  13  -8   0    4.40    6.00
  13   8   0    3.00    4.70
  13   8   0   17.50    7.50
 -13   8   0   -2.30    4.70
   0  -9   0    2.50    2.60
   0   9   0   -2.70    2.50
   0   9   0   -3.70    3.10
   0   9   0   -1.70    2.40
   1  -9   0  143.39    7.50
  -1  -9   0  150.28    7.60
   1   9   0  143.89    7.10
   1   9   0  147.59    8.50
  -1   9   0  144.09    7.20
   1   9   0  142.79    7.20
  -1   9   0  149.09    7.50
   2  -9   0   43.30    5.40
  -2  -9   0   35.50    4.40
   2   9   0   36.40    5.10
  -2   9   0   32.40    6.30
   2   9   0   30.00    3.80
  -2   9   0   33.90    4.40
  -3  -9   0    8.40    2.70
  -3  -9   0   10.80    3.30
   3  -9   0   10.40    3.60
   3   9   0   11.80    4.90
  -3   9   0    6.60    1.30
   3   9   0    8.50    2.70
  -3   9   0    6.80    2.90
  -3   9   0    9.30    3.40
  -3   9   0    8.30    1.60
  -4  -9   0    1.50    2.80
  -4  -9   0   -1.40    2.30
   4  -9   0    0.30    1.40
   4  -9   0    0.00    3.30
  -4   9   0    5.10    1.90
   4   9   0    4.70    4.10
   4   9   0   -4.00    2.10
  -4   9   0   -0.10    2.60
  -4   9   0    1.30    1.40
   4   9   0    1.90    1.40
  -4   9   0   -3.60    2.70
   4   9   0    0.00    1.10
   5  -9   0  162.88    6.10
  -5  -9   0  164.18    5.40
   5  -9   0  175.38    8.80
  -5  -9   0  162.68    7.20
   5   9   0  158.68    5.50
  -5   9   0  168.08    5.50
   5   9   0  168.68    7.30
  -5   9   0  175.38    8.80
   5   9   0  154.48    9.50
   5   9   0  171.68    8.70
  -5   9   0  166.98    8.10
   6  -9   0  197.48    9.30
   6  -9   0  195.28    6.80
  -6  -9   0  200.68    6.60
   6  -9   0  204.08    9.80
  -6  -9   0  209.88    9.60
   6  -9   0  191.68    7.40
  -6   9   0  191.28    9.30
   6   9   0  201.58   10.60
   6   9   0  198.38    8.00
   6   9   0  208.08    9.90
  -6   9   0  208.38    9.80
   7  -9   0   49.50    4.60
   7  -9   0   50.59    6.60
  -7  -9   0   52.29    3.40
   7   9   0   57.29    7.20
  -7   9   0   48.40    5.90
   7   9   0   44.80    6.20
  -7   9   0   47.00    6.40
   7   9   0   43.00    4.30
  -8  -9   0   -0.60    2.00
  -8  -9   0    5.20    1.90
   8  -9   0    5.90    4.10
   8   9   0   -3.30    4.80
  -8   9   0   -4.90    3.30
   8   9   0   -4.50    3.40
  -8   9   0   -3.10    3.90
   8   9   0   -0.10    2.30
  -9  -9   0    2.80    2.30
  -9  -9   0   -1.30    2.10
   9  -9   0    7.70    4.50
   9   9   0    2.30    3.90
  -9   9   0    2.10    3.70
   9   9   0    3.30    5.10
 -10  -9   0   -1.30    2.50
  10  -9   0    9.10    4.80
 -10  -9   0    1.20    2.50
  10   9   0    2.10    4.10
 -10   9   0    5.10    4.30
  10   9   0   -0.40    5.50
 -11  -9   0    1.00    3.00
 -11  -9   0   -0.80    2.70
  11  -9   0    3.20    5.50
  11   9   0    1.80    4.50
  11   9   0   -1.80    6.00
 -11   9   0    4.00    4.40
 -12  -9   0   11.00    3.50
 -12  -9   0   10.90    3.80
  12  -9   0   13.00    5.80
  12   9   0    2.60    6.50
 -12   9   0    9.60    5.40
  12   9   0    0.70    5.00
   0 -10   0   -1.70    2.90
   0  10   0   -1.60    2.70
   0  10   0   -1.40    2.80
  -1 -10   0   15.90    3.90
   1 -10   0   18.00    4.10
   1  10   0   16.50    3.70
  -1  10   0   10.90    3.50
   1  10   0   15.90    4.70
   1  10   0   15.60    3.50
  -1  10   0   13.20    3.60
  -2 -10   0  100.59    7.30
   2 -10   0  106.49    7.60
   2  10   0   90.99    8.10
  -2  10   0  116.09    7.30
   3 -10   0   35.40    5.30
  -3 -10   0   35.90    5.80
  -3  10   0   46.40    5.70
   3  10   0   35.90    5.60
   3  10   0   39.90    5.00
  -3  10   0   43.20    4.80
   4 -10   0   39.80    5.40
  -4 -10   0   32.70    4.90
  -4  10   0   30.80    5.00
   4  10   0   35.30    4.90
  -4  10   0   35.10    4.70
   4  10   0   30.60    5.60
   5 -10   0   33.20    5.30
   5 -10   0   31.40    3.10
  -5 -10   0   52.99    6.60
  -5  10   0   33.00    4.70
   5  10   0   34.40    5.80
  -5  10   0   45.40    6.10
   5  10   0   35.00    4.40
  -6 -10   0   45.10    5.80
   6 -10   0   54.39    6.20
  -6 -10   0   43.30    2.70
   6 -10   0   48.10    4.20
  -6  10   0   50.79    6.60
  -6  10   0   54.89    6.00
   6  10   0   59.29    7.90
   6  10   0   48.60    5.10
   7 -10   0   23.20    5.30
  -7 -10   0   24.30    5.10
  -7 -10   0   25.10    3.00
  -7  10   0   25.70    4.60
   7  10   0   25.20    5.50
  -7  10   0   25.90    5.20
   7  10   0   29.60    4.10
   7  10   0   33.30    6.50
  -8 -10   0    0.50    2.00
   8 -10   0   -1.10    5.90
  -8 -10   0   -1.30    4.20
   8  10   0    3.10    4.90
   8  10   0    1.10    5.40
  -8  10   0    3.40    4.00
  -8  10   0    1.00    4.60
   9 -10   0    1.80    5.00
  -9 -10   0    6.20    2.40
  -9  10   0    8.00    4.70
   9  10   0   16.30    6.60
   9  10   0    7.30    5.10
 -10 -10   0    4.40    2.60
  10 -10   0   -5.40    5.10
 -10  10   0    1.30    4.50
  10  10   0    1.00    6.40
  10  10   0   -4.40    4.90
   0 -11   0   -2.00    3.80
   0  11   0    2.70    3.70
   0  11   0   -0.40    3.50
  -1 -11   0   -1.60    3.70
   1 -11   0    3.00    4.20
  -1  11   0    4.20    4.00
   1  11   0    0.60    3.60
   1  11   0    3.00    4.80
  -1  11   0   -4.60    3.40
  -2 -11   0   80.39    7.90
   2 -11   0   61.19    8.30
   2  11   0   67.59    6.40
  -2  11   0   69.59    7.30
   2  11   0   67.79    8.40
  -2  11   0   71.49    7.00
  -3 -11   0    4.30    4.40
   3 -11   0    1.00    5.50
   3  11   0   -0.60    3.40
  -3  11   0   -4.60    3.80
   3  11   0   -2.00    4.60
  -3  11   0    0.00    4.00
   4 -11   0  126.19    9.90
  -4 -11   0  118.59    9.30
   4  11   0  124.99    9.90
   4  11   0  120.39    7.70
  -4  11   0  107.89    8.40
  -4  11   0  119.59    8.80
   5 -11   0    9.30    5.10
  -5 -11   0    1.10    4.80
   5  11   0    0.20    3.60
   5  11   0   14.30    5.30
  -5  11   0   -0.90    4.10
  -5  11   0    3.90    4.40
  -6 -11   0    6.50    4.90
   6 -11   0    8.00    5.00
  -6  11   0    7.90    4.70
   6  11   0    6.70    4.00
   6  11   0    5.30    5.50
  -6  11   0   12.00    4.50
  -7 -11   0   23.10    5.90
   7 -11   0   29.60    6.20
  -7  11   0   27.10    5.90
   7  11   0   29.80    7.00
  -7  11   0   23.20    5.40
   8 -11   0    0.50    5.80
  -8 -11   0    1.00    1.90
  -8 -11   0   -6.00    5.00
   8  11   0    0.60    6.50
  -8  11   0    0.60    4.50
   0 -12   0   21.50    5.70
   0  12   0   31.80    5.60
  -1 -12   0   -2.40    5.00
   1 -12   0    7.70    5.40
   1  12   0    4.00    4.60
  -1  12   0   -2.30    4.70
  -1  12   0    1.10    4.60
   2 -12   0   -3.30    5.40
  -2 -12   0   -6.90    4.90
   2  12   0   14.70    6.30
  -2  12   0    2.40    4.60
  -2  12   0    0.10    4.70
   2  12   0    3.80    4.80
  -3 -12   0   41.40    6.90
   3 -12   0   60.19    7.40
   3  12   0   40.90    7.40
  -3  12   0   43.70    6.40
   3  12   0   54.09    6.50
  -3  12   0   43.50    6.30
   4 -12   0    7.90    6.10
  -4 -12   0    4.90    5.70
   4  12   0    5.30    4.90
  -4  12   0    6.20    5.40
   4  12   0    8.10    5.90
  -4  12   0   10.90    5.40
   5 -12   0   35.10    6.80
  -5 -12   0   45.40    7.50
  -5  12   0   44.50    7.00
   5  12   0   42.30    6.30
   5  12   0   36.70    7.20
  -5  12   0   45.00    6.40
 -17   0   1    3.20    4.30
 -17   0   1    0.90    4.40
 -17   0   1    0.80    4.20
 -16   0   1   -0.90    3.20
 -16   0   1   -2.10    3.80
  16   0  -1   -0.50    2.80
  15   0  -1   55.29    4.90
 -15   0   1   61.49    6.30
 -14   0   1    1.90    2.70
  14   0  -1   -2.60    2.20
 -14   0   1    1.60    2.80
  13   0  -1   58.49    4.70
  13   0  -1   54.89    4.30
 -13   0   1   51.89    5.00
 -12   0   1   -2.20    2.10
  12   0  -1   -3.90    2.50
  12   0  -1   -2.50    1.80
 -12   0   1   -2.90    2.10
  11   0  -1   37.30    3.30
 -11   0   1   39.80    3.90
  11   0  -1   40.30    2.50
  11   0  -1   37.90    4.10
 -11   0   1   36.40    3.80
 -10   0   1   -1.20    2.40
 -10   0   1   -1.50    1.60
  10   0  -1   -2.10    1.60
  10   0  -1   -1.70    1.80
  10   0  -1    1.70    1.20
 -10   0   1    0.50    1.60
  10   0  -1   -2.30    1.30
  -9   0   1  225.78    8.00
  -9   0   1  208.78    8.60
   9   0  -1  225.18    7.90
   9   0  -1  230.28    7.50
   9   0  -1  216.68    7.80
  -9   0   1  226.58    8.00
   9   0  -1  231.18    8.60
   9   0  -1  229.58    6.80
   8   0  -1   -1.90    1.20
  -8   0   1   -0.70    1.30
   8   0  -1    0.70    0.80
   8   0  -1    1.60    1.50
   8   0  -1    1.10    1.10
   8   0  -1   -2.50    1.20
  -8   0   1   -1.30    1.60
  -8   0   1   -1.80    1.10
  -7   0   1  836.82   23.60
   7   0  -1  822.82   22.70
   7   0  -1  846.42   23.00
  -7   0   1  824.82   23.00
   7   0  -1  837.62   23.60
  -7   0   1  821.62   22.90
   7   0  -1  825.32   22.90
   7   0  -1  821.22   22.10
   6   0  -1    1.10    1.00
  -6   0   1   -1.20    0.90
   6   0  -1    0.30    0.60
  -6   0   1   -1.20    0.90
   6   0  -1    3.50    1.40
  -6   0   1    1.80    1.30
   6   0  -1   -1.80    0.90
  -5   0   1  226.98    6.90
  -5   0   1  227.48    7.40
   5   0  -1  224.68    6.80
  -5   0   1  219.58    6.30
   5   0  -1  222.18    6.80
  -5   0   1  222.08    6.90
   5   0  -1  218.68    7.30
   5   0  -1  225.58    6.30
   5   0  -1  219.68    6.80
   4   0  -1    3.40    0.60
  -4   0   1    2.80    1.00
   4   0  -1    1.10    0.70
   4   0  -1    0.40    0.80
  -4   0   1    1.60    0.80
  -4   0   1    2.00    0.90
  -4   0   1    3.80    0.60
   4   0  -1    3.90    0.90
   4   0  -1    2.60    1.10
   2   0  -1    0.20    0.30
  -2   0   1    0.30    0.30
  -2   0   1   -0.10    0.50
   2   0  -1    0.60    0.50
   2   0  -1   -0.20    0.30
   2   0  -1    0.00    0.30
  -2   0   1   -0.40    0.30
  -2   0  -1   20.60    1.10
  -2   0  -1   19.70    1.20
   2   0   1   20.90    1.10
   2   0   1   18.60    0.90
   2   0   1   20.40    1.10
  -2   0  -1   21.20    0.90
  -2   0  -1   20.40    1.10
   4   0   1   11.40    1.50
  -4   0  -1   13.20    1.70
   4   0   1   13.50    1.30
  -4   0  -1   14.10    1.70
  -4   0  -1   13.10    1.30
   4   0   1   14.10    1.60
  -4   0  -1   11.70    1.60
  -5   0  -1 6800.82  176.48
   6   0   1    2.10    1.00
  -6   0  -1    0.80    1.20
  -6   0  -1    2.00    1.30
  -6   0  -1    1.70    1.40
   6   0   1    0.10    0.80
   6   0   1    0.40    1.20
   6   0   1   -0.30    1.20
  -7   0  -1 2625.14   68.79
   7   0   1 2662.13   68.69
   7   0   1 2613.34   68.69
  -7   0  -1 2595.14   69.19
   7   0   1 2482.15   67.99
  -7   0  -1 2655.93   68.69
   7   0   1 2574.84   67.89
  -8   0  -1    3.20    1.70
  -8   0  -1    2.30    1.50
  -8   0  -1    2.50    2.00
   8   0   1    3.50    1.10
   8   0   1    3.30    1.50
   8   0   1    1.80    1.60
   9   0   1  221.48    7.20
  -9   0  -1  223.08    8.90
  -9   0  -1  224.48    8.20
   9   0   1  215.78    8.00
   9   0   1  223.98    8.10
   9   0   1  221.28    7.00
  -9   0  -1  224.48    8.20
  10   0   1   -1.50    1.90
 -10   0  -1   -1.80    2.10
  10   0   1    1.40    1.40
  10   0   1    0.70    1.40
  11   0   1  710.93   19.80
  11   0   1  708.03   20.00
 -11   0  -1  711.23   21.30
  11   0   1  683.93   21.10
 -11   0  -1  733.43   21.40
 -12   0  -1   -0.10    2.50
  12   0   1    1.40    1.70
 -12   0  -1   -3.20    2.30
  12   0   1   -1.60    1.80
 -13   0  -1   14.00    3.20
  13   0   1    9.00    2.30
 -13   0  -1    6.40    3.10
 -14   0  -1    3.10    3.30
  14   0   1    2.70    2.30
 -14   0  -1   -2.80    2.70
 -14   0  -1   -2.40    2.90
 -15   0  -1    3.40    3.50
 -15   0  -1    5.20    3.90
 -15   0  -1   -2.20    3.70
  15   0   1    5.60    2.80
 -16   0  -1   -0.60    3.90
 -16   0  -1    3.20    4.30
 -16   0  -1   -4.20    4.20
 -17   0  -1    9.90    5.20
 -17   0  -1    3.00    4.90
 -17   0  -1   -3.70    5.30
 -17  -1   1    5.40    4.40
 -17  -1   1    5.80    4.30
  17   1  -1    4.70    4.60
 -17   1   1   -5.10    4.50
 -17   1   1    1.80    4.60
 -17   1   1    3.90    4.50
 -16  -1   1   22.20    4.30
 -16  -1   1   30.50    4.70
  16  -1  -1   24.30    3.80
 -16   1   1   32.10    4.90
 -16   1   1   34.60    5.40
  16   1  -1   24.70    3.90
 -16   1   1   26.90    5.10
 -15  -1   1    8.40    3.60
  15  -1  -1    8.00    2.80
 -15  -1   1    9.00    3.50
 -15   1   1    7.80    3.60
 -15   1   1    7.80    3.60
  15   1  -1    7.40    3.00
 -14  -1   1    7.20    3.20
 -14  -1   1    8.90    3.30
  14  -1  -1    6.10    2.50
 -14   1   1   10.20    3.30
 -14   1   1    5.10    3.10
  14   1  -1    6.30    2.60
 -13  -1   1    5.10    2.50
 -13  -1   1    7.00    2.70
  13  -1  -1    6.50    2.40
  13  -1  -1    9.50    2.40
  13   1  -1    6.40    2.50
 -13   1   1    5.00    2.60
 -13   1   1    3.70    2.80
  12  -1  -1   74.19    4.00
 -12  -1   1   67.89    5.10
  12  -1  -1   75.39    4.30
  12  -1  -1   72.69    5.90
 -12  -1   1   73.89    5.10
  12  -1  -1   75.19    5.60
  12   1  -1   74.39    4.60
 -12   1   1   75.89    5.20
 -12   1   1   62.09    5.10
  11  -1  -1  352.96   12.80
  11  -1  -1  345.27   10.70
  11  -1  -1  342.07   10.90
 -11  -1   1  357.26   11.80
  11  -1  -1  346.47   11.90
 -11  -1   1  349.96   11.80
  11   1  -1  353.76   11.30
  11   1  -1  334.07   11.70
 -11   1   1  346.97   11.90
 -11   1   1  368.26   12.00
  10  -1  -1   76.29    3.70
  10  -1  -1   78.49    3.80
  10  -1  -1   78.09    4.70
 -10  -1   1   72.79    6.30
  10  -1  -1   78.39    5.40
 -10  -1   1   81.59    4.50
  10  -1  -1   71.49    4.40
 -10  -1   1   75.09    4.30
 -10   1   1   73.19    4.50
  10   1  -1   77.19    4.50
  10   1  -1   83.59    4.20
  10   1  -1   78.29    4.50
 -10   1   1   67.29    5.30
 -10   1   1   74.69    4.50
  -9  -1   1   40.40    4.00
   9  -1  -1   43.90    2.80
   9  -1  -1   40.10    2.60
  -9  -1   1   43.90    3.20
   9  -1  -1   41.70    4.00
   9  -1  -1   35.90    3.20
  -9  -1   1   39.80    3.10
   9  -1  -1   39.20    3.40
   9   1  -1   46.60    3.20
   9   1  -1   44.20    3.00
  -9   1   1   38.70    3.10
   9   1  -1   42.60    1.80
  -9   1   1   37.60    3.00
   9   1  -1   43.50    3.20
  -9   1   1   38.30    3.90
   8  -1  -1    5.80    1.30
   8  -1  -1    3.00    1.50
   8  -1  -1    3.50    1.20
   8  -1  -1    4.80    1.60
  -8  -1   1    3.50    1.40
   8  -1  -1    3.60    1.90
  -8  -1   1    4.60    1.40
  -8  -1   1    4.00    1.90
   8   1  -1    4.70    0.70
  -8   1   1    3.00    1.40
   8   1  -1    4.60    1.50
  -8   1   1    2.10    1.80
   8   1  -1    4.20    1.50
   8   1  -1    2.30    1.20
  -8   1   1    2.20    1.30
   7  -1  -1    6.50    1.70
  -7  -1   1    3.90    1.30
   7  -1  -1    7.40    1.40
   7  -1  -1    8.20    1.30
   7  -1  -1    9.40    2.10
  -7  -1   1    5.30    1.30
   7  -1  -1    7.40    1.40
  -7  -1   1    6.30    1.90
   7   1  -1    6.90    1.50
   7   1  -1    4.80    1.30
  -7   1   1    7.50    1.80
  -7   1   1    6.40    1.50
   7   1  -1    5.50    1.20
  -7   1   1    7.10    1.50
  -6  -1   1  230.08    7.40
   6  -1  -1  238.58    7.10
   6  -1  -1  236.88    8.00
  -6  -1   1  238.28    8.00
  -6  -1   1  236.08    7.50
  -6  -1   1  224.48    7.40
   6  -1  -1  250.77    7.60
   6  -1  -1  242.98    7.50
   6   1  -1  226.88    7.40
  -6   1   1  236.28    7.10
  -6   1   1  237.98    7.50
   6   1  -1  229.18    7.40
  -6   1   1  233.28    7.50
   6   1  -1  243.58    7.50
  -6   1   1  241.58    8.00
   5  -1  -1   47.10    2.40
   5  -1  -1   43.30    2.40
   5  -1  -1   50.89    2.90
  -5  -1   1   46.20    2.30
  -5  -1   1   46.50    2.30
  -5  -1   1   46.80    2.50
   5  -1  -1   46.10    2.20
  -5  -1   1   46.80    2.90
   5   1  -1   47.80    2.30
  -5   1   1   47.60    2.40
   5   1  -1   47.90    2.30
  -5   1   1   50.89    2.80
   5   1  -1   44.40    2.40
  -5   1   1   44.70    2.40
  -5   1   1   49.30    2.10
  -4  -1   1  760.32   21.00
   4  -1  -1  792.52   21.50
  -4  -1   1  811.92   21.50
   4  -1  -1  775.12   21.00
   4  -1  -1  799.82   20.90
  -4  -1   1  809.72   21.20
   4  -1  -1  769.92   21.00
  -4   1   1  763.52   20.90
  -4   1   1  765.62   21.00
  -4   1   1  788.02   21.50
  -4   1   1  772.92   21.00
   4   1  -1  789.02   21.10
   4   1  -1  788.92   21.00
   4   1  -1  775.12   21.00
  -3  -1   1 1363.66   36.30
  -3  -1   1 1439.86   36.70
  -3  -1   1 1404.06   36.30
  -3  -1   1 1401.16   36.50
   3  -1  -1 1398.36   36.40
   3  -1  -1 1395.36   36.70
   3  -1  -1 1365.66   36.40
   3  -1  -1 1395.56   36.40
  -3   1   1 1316.17   36.70
   3   1  -1 1401.06   36.30
  -3   1   1 1375.46   36.40
  -3   1   1 1401.96   36.40
   3   1  -1 1415.36   36.50
  -3   1   1 1370.66   36.40
   3   1  -1 1380.46   36.30
  -2  -1   1  705.53   18.40
  -2  -1   1  696.53   18.60
  -2  -1   1  728.03   18.90
   2  -1  -1  699.43   18.80
  -2  -1   1  685.03   18.60
   2  -1  -1  698.93   18.70
   2  -1  -1  697.13   18.70
  -2  -1   1  709.63   18.90
   2  -1  -1  726.83   19.00
  -2   1   1  722.03   19.00
  -2   1   1  714.63   18.80
  -2   1   1  707.03   18.70
   2   1  -1  715.13   18.60
   2   1  -1  715.53   18.90
  -2   1   1  701.73   18.70
   2   1  -1  712.83   18.60
  -1  -1   1  335.67    9.00
   1  -1  -1  324.17    8.90
  -1  -1   1  337.17    8.80
   1  -1  -1  338.77    9.10
   1  -1  -1  338.17    9.20
  -1  -1   1  333.97    8.80
   1  -1  -1  333.47    9.10
   1  -1  -1  324.77    8.90
  -1   1   1  333.17    9.10
   1   1  -1  331.57    8.80
  -1   1   1  327.37    8.90
  -1   1   1  329.27    9.10
  -1   1   1  330.27    8.90
   1   1  -1  325.37    9.00
   1   1  -1  341.47    8.80
  -1   1   1  349.77    9.20
  -1   1   1  320.07    8.90
  -1  -1  -1  862.51   23.00
   1  -1   1  876.71   22.90
   1  -1   1  886.91   23.10
  -1  -1  -1  880.21   23.30
  -1  -1  -1  874.41   22.90
   1  -1   1  865.21   22.80
   1  -1   1  897.41   23.10
   1  -1   1  879.71   22.80
  -1  -1  -1  867.71   22.90
   1  -1   1  867.61   22.60
   1   1   1  879.31   23.00
   1   1   1  866.21   23.30
   1   1   1  872.01   22.90
  -1   1  -1  886.41   22.90
  -1   1  -1  882.11   23.00
   1   1   1  868.71   22.90
  -1   1  -1  866.11   22.80
   2  -1   1  808.02   21.30
   2  -1   1  816.02   21.20
   2  -1   1  823.52   21.40
  -2  -1  -1  790.22   21.20
  -2  -1  -1  792.62   21.20
   2  -1   1  806.42   21.20
   2  -1   1  789.32   21.10
  -2  -1  -1  796.92   21.20
  -2   1  -1  806.52   21.30
  -2   1  -1  799.22   21.10
   2   1   1  792.82   21.20
  -2   1  -1  790.22   21.20
   2   1   1  813.22   21.20
   2   1   1  797.82   21.20
  -2   1  -1  782.72   21.10
  -3  -1  -1  482.45   13.00
   3  -1   1  479.85   13.10
   3  -1   1  478.15   13.10
  -3  -1  -1  458.25   13.00
   3  -1   1  481.75   13.10
   3  -1   1  475.05   12.50
   3  -1   1  471.15   13.20
   3   1   1  481.95   13.00
  -3   1  -1  474.95   13.20
  -3   1  -1  456.35   13.20
   3   1   1  491.25   13.10
   3   1   1  487.05   13.10
  -3   1  -1  479.15   13.10
  -3   1  -1  475.45   13.10
  -4  -1  -1 1364.86   36.90
   4  -1   1 1394.66   36.80
   4  -1   1 1408.16   36.90
  -4  -1  -1 1397.06   36.80
  -4  -1  -1 1302.27   37.30
   4  -1   1 1447.16   37.10
   4  -1   1 1383.76   36.30
   4  -1   1 1422.56   36.90
   4   1   1 1359.06   36.90
  -4   1  -1 1410.06   37.10
  -4   1  -1 1422.96   36.90
   4   1   1 1352.86   36.70
   4   1   1 1408.16   36.90
  -4   1  -1 1411.76   36.90
  -4   1  -1 1423.66   37.10
   5  -1   1  641.64   17.50
  -5  -1  -1  631.34   17.90
   5  -1   1  637.94   17.40
  -5  -1  -1  634.64   17.20
   5  -1   1  626.14   16.70
   5  -1   1  623.94   17.20
  -5  -1  -1  631.54   17.40
  -5  -1  -1  625.84   17.40
   5  -1   1  613.14   17.70
   5   1   1  631.64   17.40
   5   1   1  611.54   17.40
  -5   1  -1  626.94   17.60
  -5   1  -1  629.54   17.40
  -5   1  -1  621.64   17.70
  -5   1  -1  617.24   17.40
  -6  -1  -1    1.40    1.10
  -6  -1  -1    7.70    2.00
  -6  -1  -1    0.40    1.00
  -6  -1  -1    0.00    1.10
   6  -1   1    1.30    1.10
   6  -1   1    4.20    1.50
   6  -1   1    1.60    1.10
   6  -1   1    2.30    0.80
   6  -1   1    4.10    1.20
  -6   1  -1    2.60    1.20
   6   1   1    2.40    1.20
  -6   1  -1    1.00    1.20
  -6   1  -1   -0.60    1.40
   6   1   1    0.90    1.00
   6   1   1    4.30    1.20
   7  -1   1   63.59    2.60
  -7  -1  -1   65.29    4.10
  -7  -1  -1   62.19    3.40
   7  -1   1   60.09    3.40
   7  -1   1   68.89    3.50
  -7  -1  -1   59.19    3.40
   7  -1   1   59.49    3.80
  -7  -1  -1   59.89    3.20
   7  -1   1   63.69    3.00
   7   1   1   56.89    3.30
   7   1   1   58.79    2.90
   7   1   1   57.29    3.30
  -7   1  -1   68.39    3.90
  -7   1  -1   66.79    3.50
  -7   1  -1   59.79    3.40
   8  -1   1   50.39    3.70
   8  -1   1   50.49    3.40
  -8  -1  -1   48.30    4.20
  -8  -1  -1   51.19    3.10
  -8  -1  -1   50.89    3.40
  -8  -1  -1   43.60    3.30
   8  -1   1   50.59    2.80
   8  -1   1   47.70    3.30
   8  -1   1   46.30    2.70
  -8   1  -1   49.70    3.30
   8   1   1   45.40    2.30
  -8   1  -1   48.40    3.90
   8   1   1   44.10    3.20
   8   1   1   47.40    2.80
   8   1   1   51.79    3.30
  -8   1  -1   49.90    3.40
  -9  -1  -1    1.40    1.80
   9  -1   1    4.60    1.30
  -9  -1  -1    1.00    1.80
   9  -1   1    5.30    1.60
   9  -1   1    1.50    1.70
  -9  -1  -1    3.90    2.60
  -9  -1  -1    3.00    1.70
   9  -1   1    0.80    1.80
  -9   1  -1    5.70    2.30
   9   1   1    4.70    1.70
  -9   1  -1    0.70    1.80
   9   1   1    4.80    1.40
  -9   1  -1    2.80    1.70
   9   1   1    3.50    1.20
   9   1   1    1.40    1.60
  10  -1   1  187.58    6.20
  10  -1   1  189.38    7.60
 -10  -1  -1  185.98    7.50
  10  -1   1  179.08    7.50
  10  -1   1  181.18    6.60
 -10  -1  -1  203.48    7.70
 -10   1  -1  174.78    8.20
 -10   1  -1  184.28    7.60
 -10   1  -1  191.88    7.60
  10   1   1  189.18    7.50
  10   1   1  182.38    6.70
 -10   1  -1  192.58    7.80
  10   1   1  179.88    5.90
  11  -1   1   36.40    4.50
  11  -1   1   36.70    2.80
  11  -1   1   34.50    3.30
 -11  -1  -1   36.20    4.00
 -11  -1  -1   42.20    4.20
 -11   1  -1   36.10    4.30
  11   1   1   32.00    2.70
 -11   1  -1   44.30    4.50
  11   1   1   34.00    3.30
 -11   1  -1   35.40    4.30
  12  -1   1   81.49    4.60
  12  -1   1   84.29    4.10
  12  -1   1   72.09    6.00
 -12  -1  -1   86.39    5.80
 -12   1  -1   89.59    5.90
 -12   1  -1   88.99    5.90
 -12   1  -1   83.59    5.80
  12   1   1   93.19    4.80
  13  -1   1    1.00    1.70
 -13  -1  -1    3.90    2.80
 -13  -1  -1    1.70    2.80
  13   1   1    1.30    2.20
 -13   1  -1   -0.70    2.80
 -13   1  -1    0.00    2.50
 -13   1  -1   -0.90    3.10
 -14  -1  -1    6.50    3.40
 -14  -1  -1    4.00    3.30
  14  -1   1    8.20    2.30
 -14   1  -1   13.10    3.70
 -14   1  -1    8.70    3.20
  14   1   1   10.70    2.90
 -14   1  -1    6.60    3.00
 -15  -1  -1   -2.40    3.50
 -15  -1  -1   -0.70    3.30
 -15  -1  -1   -1.00    3.60
 -15   1  -1    5.70    4.00
  15   1   1   -3.60    2.70
 -15   1  -1    2.70    3.70
 -15   1  -1   -3.30    3.30
 -16  -1  -1    1.00    4.20
 -16  -1  -1   -0.90    4.20
 -16  -1  -1    0.30    4.30
 -16   1  -1   -1.40    4.00
 -16   1  -1   -0.40    4.40
 -16   1  -1   -4.60    4.00
 -17  -1  -1   10.50    5.20
 -17  -1  -1    4.40    4.50
 -17  -1  -1   12.70    5.30
 -17   1  -1    8.60    5.10
 -17   1  -1    6.50    5.10
 -17   1  -1    0.60    5.50
 -17  -2   1   -4.70    3.90
 -17  -2   1   -2.50    4.30
  17   2  -1    0.10    3.80
 -17   2   1    3.00    4.40
 -17   2   1  -12.20    4.40
 -16  -2   1    6.40    3.50
 -16  -2   1    8.10    4.00
 -16   2   1    6.20    4.30
 -16   2   1   11.90    4.40
  16   2  -1   13.20    3.70
 -16   2   1   10.00    4.50
  15  -2  -1    2.30    2.50
 -15  -2   1    0.50    3.20
 -15  -2   1    1.50    3.20
  15   2  -1    2.90    2.80
 -15   2   1   -1.80    3.10
 -15   2   1   -3.20    3.30
 -15   2   1   -1.60    3.60
  14  -2  -1    1.80    2.20
 -14  -2   1   -0.70    2.50
 -14  -2   1    2.00    3.00
 -14   2   1   -1.00    2.80
  14   2  -1   -0.10    2.40
 -14   2   1    6.70    3.30
 -14   2   1    1.70    3.20
  13  -2  -1   53.29    5.80
 -13  -2   1   50.59    4.60
 -13  -2   1   65.79    5.20
  13  -2  -1   56.59    8.00
  13  -2  -1   54.19    3.90
  13  -2  -1   61.99    4.60
 -13   2   1   55.89    5.30
 -13   2   1   55.19    5.20
  13   2  -1   57.39    4.50
 -13   2   1   60.19    5.60
  12  -2  -1    0.70    2.20
  12  -2  -1    5.40    2.80
 -12  -2   1   -0.30    2.00
  12  -2  -1    1.70    3.10
 -12  -2   1    0.20    2.00
  12  -2  -1    2.90    1.90
 -12   2   1    0.00    2.30
 -12   2   1   -1.00    2.50
  12   2  -1    3.80    2.30
  11  -2  -1   17.40    3.10
  11  -2  -1   16.60    2.30
 -11  -2   1   16.20    2.70
  11  -2  -1   17.50    3.00
  11  -2  -1   18.90    2.70
 -11  -2   1   17.50    2.80
  11  -2  -1   16.00    3.40
 -11   2   1   19.30    2.90
  11   2  -1   15.10    2.60
 -11   2   1   12.40    2.40
  10  -2  -1  124.89    5.80
 -10  -2   1  125.29    5.70
  10  -2  -1  130.89    6.00
  10  -2  -1  129.09    6.70
  10  -2  -1  125.09    5.30
 -10  -2   1  126.99    5.70
  10  -2  -1  124.29    5.00
 -10   2   1  127.79    5.80
 -10   2   1  119.99    6.80
 -10   2   1  129.89    5.80
  10   2  -1  130.99    5.60
  10   2  -1  117.89    5.60
   9  -2  -1  215.78    8.40
  -9  -2   1  215.08    7.50
  -9  -2   1  203.88    7.70
   9  -2  -1  200.48    7.10
  -9  -2   1  194.28    8.40
  -9  -2   1  215.38    7.50
   9  -2  -1  212.78    7.00
   9  -2  -1  205.78    7.60
   9  -2  -1  204.98    7.50
   9   2  -1  208.78    7.40
   9   2  -1  208.78    7.40
  -9   2   1  204.28    7.50
  -9   2   1  201.38    8.30
   9   2  -1  192.68    7.30
  -9   2   1  212.48    7.60
   8  -2  -1   16.40    2.40
  -8  -2   1   16.40    2.20
   8  -2  -1   15.20    2.10
   8  -2  -1   16.60    2.20
  -8  -2   1   14.90    1.80
   8  -2  -1   18.90    2.80
  -8  -2   1   18.10    2.90
  -8  -2   1   15.70    2.20
  -8   2   1   16.80    2.00
  -8   2   1   16.70    2.60
  -8   2   1   13.40    1.80
   8   2  -1   17.20    2.20
   8   2  -1   14.50    2.00
   8   2  -1   17.50    2.20
  -8   2   1   17.10    2.30
   7  -2  -1  251.57    7.90
  -7  -2   1  246.28    8.80
  -7  -2   1  245.78    8.00
   7  -2  -1  263.07    8.80
   7  -2  -1  249.18    8.10
  -7  -2   1  245.48    8.00
   7  -2  -1  250.87    8.10
  -7  -2   1  256.57    8.40
   7   2  -1  244.18    8.10
  -7   2   1  237.08    8.60
  -7   2   1  252.67    8.20
  -7   2   1  256.37    8.20
  -7   2   1  256.07    7.90
   7   2  -1  247.18    8.00
   7   2  -1  249.78    8.00
   6  -2  -1  616.84   17.30
  -6  -2   1  626.14   17.20
   6  -2  -1  602.74   17.30
   6  -2  -1  640.74   18.00
  -6  -2   1  628.24   17.50
   6  -2  -1  602.34   17.20
  -6  -2   1  624.34   18.00
  -6  -2   1  598.44   17.20
   6   2  -1  602.84   17.30
   6   2  -1  609.74   17.10
  -6   2   1  622.04   17.30
  -6   2   1  622.44   17.30
  -6   2   1  619.74   17.90
   6   2  -1  614.34   17.20
  -6   2   1  620.74   17.20
  -5  -2   1   50.79    2.30
  -5  -2   1   55.29    2.80
  -5  -2   1   55.29    3.10
   5  -2  -1   49.00    2.50
   5  -2  -1   56.49    3.10
   5  -2  -1   47.20    2.60
  -5  -2   1   51.09    2.40
   5  -2  -1   47.00    2.50
  -5   2   1   49.30    3.00
  -5   2   1   47.90    2.40
   5   2  -1   49.20    2.60
   5   2  -1   51.19    2.40
   5   2  -1   51.79    2.40
  -5   2   1   48.40    2.50
  -5   2   1   50.19    2.50
  -4  -2   1   54.29    2.20
   4  -2  -1   52.99    2.50
  -4  -2   1   50.49    2.20
   4  -2  -1   48.00    3.30
   4  -2  -1   51.59    2.30
  -4  -2   1   58.39    2.70
   4  -2  -1   51.99    2.30
  -4   2   1   48.90    2.70
   4   2  -1   50.69    2.20
  -4   2   1   50.49    2.30
   4   2  -1   52.19    1.60
  -4   2   1   50.29    2.30
   4   2  -1   52.79    2.20
   4   2  -1   50.99    3.10
   4   2  -1   53.59    2.50
   3  -2  -1    1.20    0.80
  -3  -2   1    1.80    0.60
   3  -2  -1    2.60    1.00
  -3  -2   1    2.90    0.60
  -3  -2   1    3.00    0.60
  -3  -2   1    2.20    0.70
   3  -2  -1    2.00    0.70
   3  -2  -1    2.20    0.70
   3   2  -1    2.70    0.60
   3   2  -1    3.00    0.60
  -3   2   1    2.30    0.90
  -3   2   1    2.40    0.90
   3   2  -1    2.60    0.90
  -3   2   1    2.30    0.90
  -3   2   1    1.70    0.60
   3   2  -1    2.80    0.50
   3   2  -1    1.70    1.20
  -3   2   1    2.20    0.60
   2  -2  -1 2463.75   65.29
  -2  -2   1 2544.15   65.09
  -2  -2   1 2535.95   65.29
   2  -2  -1 2461.15   65.19
  -2   2   1 2449.75   65.09
  -2   2   1 2532.15   65.19
  -1  -2   1  186.08    5.00
   1  -2  -1  196.38    5.50
   1  -2  -1  190.98    5.30
   1  -2  -1  186.98    5.80
  -1  -2   1  220.08    5.90
   1  -2  -1  183.58    5.90
   1  -2  -1  184.18    5.70
   1  -2  -1  191.38    5.30
  -1  -2   1  187.08    5.50
  -1  -2   1  203.98    5.60
   1   2  -1  184.78    5.00
  -1   2   1  190.88    5.50
   1   2  -1  184.88    5.00
   1   2  -1  208.28    5.60
   1   2  -1  179.58    5.70
  -1   2   1  183.48    5.30
  -1   2   1  177.98    5.20
   1   2  -1  188.88    5.50
  -1   2   1  187.18    5.30
  -1   2   1  173.08    5.30
  -1   2   1  185.88    5.70
  -1   2   1  188.08    5.90
   0  -2  -1 2242.98   58.49
   0  -2  -1 2236.68   58.29
   0  -2   1 2272.67   58.39
   0   2   1 2193.18   58.49
   1  -2   1    9.30    0.60
  -1  -2  -1   10.40    0.80
  -1  -2  -1    8.50    1.00
  -1  -2  -1    9.80    0.70
  -1  -2  -1   10.00    1.50
  -1  -2  -1    9.70    1.30
   1  -2   1    8.60    0.70
   1  -2   1    9.60    0.70
   1  -2   1   10.20    1.10
   1  -2   1    9.90    0.90
   1  -2   1    7.10    1.00
   1   2   1    9.30    0.70
   1   2   1    8.30    0.70
  -1   2  -1    9.20    0.80
  -1   2  -1    9.00    0.80
   1   2   1    7.50    1.00
  -1   2  -1    9.30    1.10
  -1   2  -1    9.10    0.60
   1   2   1   12.40    1.60
   1   2   1    9.30    1.10
  -1   2  -1    8.10    1.00
  -2  -2  -1 3688.73   94.29
   2   2   1 3529.75   94.19
  -3  -2  -1 1042.90   27.60
   3  -2   1 1028.70   27.40
   3  -2   1 1042.40   27.70
   3  -2   1 1050.29   27.60
  -3  -2  -1 1031.60   27.40
   3  -2   1 1031.60   27.40
  -3  -2  -1 1009.80   27.40
  -3   2  -1 1028.80   27.40
  -3   2  -1 1059.79   27.80
  -3   2  -1 1048.10   27.60
  -3   2  -1 1036.90   27.40
   3   2   1  969.40   27.60
   3   2   1 1052.29   28.30
   4  -2   1  126.99    4.60
   4  -2   1  124.89    4.30
   4  -2   1  128.59    4.30
   4  -2   1  124.99    4.40
  -4  -2  -1  125.29    4.30
  -4  -2  -1  129.19    4.50
  -4  -2  -1  125.19    4.30
  -4   2  -1  125.99    4.60
   4   2   1  124.59    5.30
  -4   2  -1  127.49    4.30
   4   2   1  127.19    4.30
  -4   2  -1  127.69    4.30
   4   2   1  128.79    4.30
   4   2   1  122.19    4.40
  -4   2  -1  134.69    4.60
   5  -2   1  262.47    7.90
  -5  -2  -1  262.17    8.00
   5  -2   1  261.87    8.30
  -5  -2  -1  259.57    7.90
   5  -2   1  254.27    7.90
   5  -2   1  254.87    7.90
  -5  -2  -1  256.47    7.90
   5   2   1  256.17    7.90
  -5   2  -1  256.17    8.10
   5   2   1  251.57    7.80
  -5   2  -1  257.57    7.90
  -5   2  -1  258.87    8.30
   5   2   1  253.97    7.90
  -5   2  -1  255.67    8.20
   6  -2   1 1412.96   37.90
  -6  -2  -1 1369.46   37.40
   6  -2   1 1398.86   37.50
  -6  -2  -1 1361.86   37.40
   6  -2   1 1389.66   37.40
  -6  -2  -1 1381.96   38.10
  -6  -2  -1 1426.66   37.50
   6  -2   1 1369.46   36.60
   6  -2   1 1382.06   37.50
   6   2   1 1397.36   37.50
  -6   2  -1 1433.86   38.00
  -6   2  -1 1439.86   37.50
   6   2   1 1398.26   37.40
  -6   2  -1 1392.16   37.80
  -6   2  -1 1411.76   37.50
   6   2   1 1389.76   37.40
   7  -2   1   11.70    1.80
   7  -2   1    9.90    1.70
  -7  -2  -1   13.90    1.90
   7  -2   1   11.90    1.70
   7  -2   1   12.50    2.10
  -7  -2  -1   11.40    2.30
  -7  -2  -1   12.50    1.80
   7  -2   1   10.20    1.30
  -7  -2  -1   10.80    1.70
  -7   2  -1    9.90    1.80
   7   2   1   12.60    1.60
  -7   2  -1    9.40    1.70
   7   2   1   14.70    1.90
   7   2   1   12.90    1.90
  -7   2  -1   12.10    1.90
  -7   2  -1   12.20    2.20
  -8  -2  -1   -0.80    1.20
   8  -2   1    1.40    1.60
   8  -2   1   -1.40    1.40
  -8  -2  -1    2.60    1.60
   8  -2   1   -0.90    1.70
   8  -2   1    1.40    0.90
   8  -2   1   -1.30    1.30
  -8  -2  -1   -1.20    1.90
  -8  -2  -1    0.60    1.30
  -8   2  -1    1.70    1.40
   8   2   1    0.00    1.30
   8   2   1    1.40    1.40
  -8   2  -1   -0.30    1.40
  -8   2  -1    1.70    1.90
  -8   2  -1   -0.50    1.40
   8   2   1    1.00    1.20
   9  -2   1  265.67    9.50
  -9  -2  -1  242.98    9.90
   9  -2   1  253.27    8.80
   9  -2   1  242.28    8.80
  -9  -2  -1  248.48    8.80
   9  -2   1  244.98    7.50
  -9  -2  -1  248.58    8.80
   9  -2   1  248.18    8.40
  -9  -2  -1  262.57    8.90
  -9   2  -1  247.18    9.10
   9   2   1  248.38    7.20
   9   2   1  248.18    8.50
   9   2   1  255.37    8.80
  -9   2  -1  255.07    9.00
  -9   2  -1  263.67    8.90
  -9   2  -1  248.78    9.50
 -10  -2  -1    5.40    2.10
  10  -2   1    2.20    1.30
  10  -2   1   -1.70    2.10
  10  -2   1    0.10    2.20
 -10  -2  -1    0.70    2.00
 -10  -2  -1    2.70    1.90
  10  -2   1    2.20    2.40
  10  -2   1    2.30    1.90
 -10   2  -1    0.10    2.10
 -10   2  -1    0.80    1.70
  10   2   1    3.50    1.80
  10   2   1    1.50    1.00
 -10   2  -1   -0.40    2.10
 -10   2  -1    2.90    2.80
 -11  -2  -1  437.46   14.60
  11  -2   1  439.56   14.00
  11  -2   1  445.86   14.80
 -11  -2  -1  469.05   14.80
 -11  -2  -1  471.05   15.00
  11  -2   1  469.25   13.10
 -11   2  -1  480.25   15.10
 -11   2  -1  470.35   15.00
  11   2   1  452.85   12.60
  11   2   1  467.75   14.30
 -11   2  -1  457.85   15.20
  12  -2   1    1.60    1.50
  12  -2   1    5.10    2.40
 -12  -2  -1    3.00    2.40
 -12  -2  -1    2.90    2.40
  12  -2   1    6.50    3.10
 -12   2  -1    0.90    2.70
  12   2   1    2.10    2.30
 -12   2  -1    3.10    2.80
 -12   2  -1    1.20    2.50
  13  -2   1   -0.40    3.60
 -13  -2  -1    0.00    2.90
  13  -2   1    8.20    3.80
  13  -2   1   -0.50    1.60
 -13  -2  -1   -0.70    2.60
 -13   2  -1   -1.30    2.60
 -13   2  -1    2.10    3.00
  13   2   1    0.10    2.30
 -13   2  -1   -1.90    4.40
 -14  -2  -1    2.20    3.30
  14  -2   1    3.20    2.30
 -14  -2  -1   -0.40    3.10
 -14   2  -1    5.80    3.50
  14   2   1    3.40    2.80
 -14   2  -1   -2.50    3.20
 -14   2  -1    2.90    3.30
 -15  -2  -1   -3.50    3.30
 -15  -2  -1   -3.30    3.50
 -15   2  -1   -0.10    4.00
 -15   2  -1   -0.80    3.90
 -15   2  -1    1.00    3.60
  15   2   1   -1.90    3.10
 -16  -2  -1    4.30    4.20
 -16  -2  -1    3.30    3.90
 -16   2  -1   -5.90    4.40
 -16   2  -1   -3.60    4.30
 -17  -3   1    8.60    4.50
 -17  -3   1    9.20    4.40
  17   3  -1    8.60    4.50
 -17   3   1    6.90    5.20
  17   3  -1    5.50    8.10
 -17   3   1    7.10    5.30
 -16  -3   1    0.60    3.60
 -16  -3   1   -2.90    3.50
  16   3  -1   -0.90    3.70
 -16   3   1   -2.10    4.10
 -16   3   1   -0.90    4.30
 -15  -3   1   32.20    4.50
 -15  -3   1   38.90    4.90
  15  -3  -1   41.70    6.10
 -15   3   1   41.50    5.50
 -15   3   1   42.70    5.90
  15   3  -1   38.70    4.60
 -15   3   1   30.10    4.70
 -14  -3   1    2.10    2.90
 -14  -3   1    0.50    2.40
  14  -3  -1    3.70    3.90
  14  -3  -1    3.70    2.10
  14   3  -1    2.70    2.70
 -14   3   1    6.50    3.20
 -14   3   1    8.60    3.70
 -14   3   1   -0.30    3.10
 -13  -3   1    6.40    2.70
  13  -3  -1    4.00    3.30
  13  -3  -1    1.90    2.00
 -13  -3   1    1.20    2.30
  13  -3  -1    2.30    3.00
  13   3  -1    5.00    2.50
 -13   3   1    3.00    3.00
 -13   3   1    2.50    2.80
 -13   3   1    9.00    3.10
 -12  -3   1   95.39    6.70
  12  -3  -1  120.49    6.70
  12  -3  -1  111.29    7.40
  12  -3  -1  109.29    5.90
 -12  -3   1  117.89    6.20
  12  -3  -1  111.69    5.00
 -12   3   1  104.89    6.40
 -12   3   1  118.59    6.30
 -12   3   1  107.49   10.30
  12   3  -1  113.79    6.00
  11  -3  -1   33.50    3.80
 -11  -3   1   29.90    3.60
  11  -3  -1   30.10    3.80
  11  -3  -1   31.70    4.20
  11  -3  -1   29.80    3.00
 -11  -3   1   32.60    3.70
  11  -3  -1   30.00    4.30
 -11   3   1   32.30    3.80
 -11   3   1   36.80    4.10
  11   3  -1   26.70    3.30
 -11   3   1   29.80    3.70
 -10  -3   1  640.64   18.90
 -10  -3   1  612.04   19.30
  10  -3  -1  639.24   18.20
 -10  -3   1  639.54   18.90
  10  -3  -1  655.63   19.10
  10  -3  -1  620.34   18.80
  10  -3  -1  649.24   20.00
  10  -3  -1  644.84   19.10
  10   3  -1  636.94   19.00
 -10   3   1  665.53   19.20
 -10   3   1  640.34   19.00
 -10   3   1  621.34   19.90
 -10   3   1  634.64   19.50
   9  -3  -1   20.50    2.60
   9  -3  -1   15.40    2.90
  -9  -3   1   14.10    2.00
   9  -3  -1   17.50    2.40
  -9  -3   1   19.60    3.00
  -9  -3   1   15.20    3.20
  -9  -3   1   15.10    2.20
  -9   3   1   14.60    2.60
  -9   3   1   16.00    3.10
   9   3  -1   15.20    2.20
  -9   3   1   16.50    2.40
   9   3  -1   14.40    2.10
   9   3  -1   18.50    2.70
  -9   3   1   14.00    2.40
  -9   3   1   17.00    2.70
  -8  -3   1    2.70    1.30
  -8  -3   1    3.20    1.30
   8  -3  -1    3.50    1.50
   8  -3  -1    2.00    2.00
  -8  -3   1    4.00    1.80
   8  -3  -1    5.30    1.60
   8  -3  -1    1.10    1.60
  -8   3   1    1.80    1.90
   8   3  -1    3.60    1.60
   8   3  -1    4.60    1.40
   8   3  -1    4.10    2.70
  -8   3   1    2.60    1.70
   8   3  -1    2.60    1.40
  -8   3   1    4.50    1.60
  -8   3   1    2.60    1.40
  -8   3   1    2.50    1.30
   7  -3  -1   81.59    4.00
   7  -3  -1   77.29    4.50
  -7  -3   1   76.19    4.10
  -7  -3   1   79.09    3.60
   7  -3  -1   82.89    3.90
   7  -3  -1   83.89    3.80
  -7  -3   1   79.29    3.60
  -7  -3   1   79.19    4.60
  -7   3   1   79.69    4.50
  -7   3   1   79.69    3.70
  -7   3   1   80.29    4.20
   7   3  -1   76.19    3.90
   7   3  -1   84.59    5.10
  -7   3   1   79.69    3.80
  -7   3   1   80.39    3.90
   7   3  -1   82.19    3.70
   7   3  -1   83.29    3.70
   6  -3  -1   93.59    4.10
   6  -3  -1   99.49    4.10
  -6  -3   1   97.29    3.80
  -6  -3   1   96.59    3.80
   6  -3  -1   96.89    4.20
  -6  -3   1  109.49    4.50
  -6  -3   1   97.19    4.60
   6  -3  -1   92.89    4.60
  -6   3   1   97.89    4.10
   6   3  -1   96.89    5.10
  -6   3   1   95.59    3.90
  -6   3   1   98.19    4.00
  -6   3   1   97.59    4.60
   6   3  -1   91.39    3.70
   6   3  -1   94.39    3.80
   6   3  -1   98.99    4.20
  -6   3   1   96.79    4.40
   5  -3  -1  657.83   18.10
  -5  -3   1  644.14   17.80
   5  -3  -1  674.13   18.10
   5  -3  -1  689.43   18.80
  -5  -3   1  640.34   18.50
   5  -3  -1  671.73   18.50
  -5  -3   1  652.93   17.90
   5   3  -1  650.43   17.90
  -5   3   1  659.03   18.00
   5   3  -1  654.63   17.80
  -5   3   1  627.34   18.50
  -5   3   1  639.14   18.30
  -5   3   1  658.83   18.70
   5   3  -1  653.73   19.00
   5   3  -1  663.43   18.40
   5   3  -1  635.54   17.30
  -5   3   1  639.74   18.00
  -4  -3   1  469.25   12.70
  -4  -3   1  468.25   13.40
  -4  -3   1  457.25   12.80
   4  -3  -1  463.95   13.70
   4  -3  -1  470.25   13.00
   4  -3  -1  456.85   13.40
  -4  -3   1  472.25   12.70
   4  -3  -1  460.45   13.00
  -4   3   1  453.25   13.30
  -4   3   1  473.15   13.60
   4   3  -1  464.65   12.80
   4   3  -1  459.75   13.90
   4   3  -1  458.25   12.50
   4   3  -1  454.15   13.30
  -4   3   1  475.35   13.50
  -4   3   1  459.75   13.00
   4   3  -1  471.55   12.70
   3  -3  -1  177.88    6.10
  -3  -3   1  182.78    5.20
  -3  -3   1  182.18    5.30
  -3  -3   1  189.28    5.50
   3  -3  -1  185.48    6.20
   3  -3  -1  182.08    5.50
   3  -3  -1  183.98    5.60
  -3  -3   1  177.08    6.00
  -3  -3   1  168.48    6.90
  -3   3   1  189.08    5.50
  -3   3   1  183.18    5.90
   3   3  -1  183.18    6.30
   3   3  -1  169.58    5.90
   3   3  -1  181.88    5.40
  -3   3   1  173.48    6.50
   3   3  -1  189.88    5.30
   3   3  -1  184.48    5.30
  -3   3   1  181.98    6.00
  -2  -3   1  704.83   19.90
  -2  -3   1  771.12   20.20
  -2  -3   1  706.43   19.50
   2  -3  -1  703.13   19.80
   2  -3  -1  696.93   19.10
   2  -3  -1  724.23   20.10
  -2  -3   1  718.73   18.80
   2  -3  -1  706.23   19.80
   2  -3  -1  715.83   19.10
  -2  -3   1  834.52   19.50
   2  -3  -1  712.33   19.50
   2   3  -1  709.43   18.80
  -2   3   1  649.83   19.90
   2   3  -1  824.92   18.90
   2   3  -1  792.12   19.70
  -2   3   1  676.43   19.00
  -2   3   1  699.03   19.70
   2   3  -1  641.84   20.40
  -2   3   1  687.23   19.10
  -2   3   1  684.23   19.70
  -1  -3   1   45.80    2.60
  -1  -3   1   47.00    2.20
   1  -3  -1   48.00    1.80
   1  -3  -1   44.20    2.50
  -1  -3   1   50.79    2.20
   1  -3  -1   39.40    3.00
  -1  -3   1   54.99    2.30
   1  -3  -1   48.30    2.30
   1  -3  -1   46.80    2.10
   1  -3  -1   45.20    2.40
   1  -3  -1   45.30    1.70
   1   3  -1   45.70    2.20
   1   3  -1   49.80    2.30
  -1   3   1   45.10    1.70
  -1   3   1   46.30    2.30
   1   3  -1   44.60    2.60
  -1   3   1   47.80    1.80
  -1   3   1   41.00    2.40
  -1   3   1   47.50    1.80
   1   3  -1   42.70    2.50
  -1   3   1   47.70    2.10
  -1   3   1   43.90    2.60
   0  -3   1  252.87    7.70
   0  -3  -1  249.78    7.40
   0  -3   1  249.68    7.20
   0  -3   1  238.18    7.30
   0  -3   1  247.78    7.20
   0  -3  -1  236.08    7.90
   0  -3  -1  239.28    6.80
   0  -3  -1  246.08    6.70
   0  -3  -1  252.77    7.10
   0  -3  -1  249.68    7.50
   0  -3  -1  243.98    7.50
   0  -3   1  250.67    7.40
   0   3   1  241.98    7.50
   0   3  -1  248.68    7.70
   0   3  -1  252.27    7.40
   0   3   1  238.88    7.80
   0   3   1  248.08    7.10
   0   3   1  249.08    6.70
   0   3   1  251.87    6.80
   0   3   1  245.28    6.80
   0   3  -1  244.88    7.20
   0   3  -1  222.08    7.70
  -1  -3  -1 2354.76   60.49
  -1  -3  -1 2182.68   60.89
   1  -3   1 2393.26   60.29
   1  -3   1 2393.56   60.79
   1  -3   1 2329.07   60.09
  -1  -3  -1 2357.46   59.99
   1  -3   1 2096.39   60.69
  -1   3  -1 2321.37   60.19
   1   3   1 2334.87   60.39
   1   3   1 2332.67   60.89
   1   3   1 2329.97   60.09
  -1   3  -1 2331.67   60.49
  -1   3  -1 2297.97   60.49
   1   3   1 2245.08   60.49
  -2  -3  -1  836.72   22.20
  -2  -3  -1  743.03   22.40
  -2  -3  -1  855.21   23.40
  -2  -3  -1  870.21   22.70
   2  -3   1  881.51   22.80
  -2  -3  -1  812.02   22.10
   2  -3   1  823.22   22.10
   2  -3   1  851.41   22.60
   2  -3   1  855.71   22.20
  -2  -3  -1  837.22   22.70
   2  -3   1  825.02   22.80
   2  -3   1  813.92   22.10
  -2   3  -1  833.42   22.10
  -2   3  -1  804.72   22.70
   2   3   1  855.41   22.50
   2   3   1  836.52   23.30
  -2   3  -1  853.21   22.50
   2   3   1  849.72   22.20
   2   3   1  832.22   22.80
   2   3   1  838.62   22.10
  -2   3  -1  837.22   22.10
  -2   3  -1  856.11   22.90
  -3  -3  -1    3.10    0.80
  -3  -3  -1    3.50    1.70
   3  -3   1    5.40    1.30
  -3  -3  -1    6.10    1.20
   3  -3   1    4.30    0.80
   3  -3   1    4.40    0.80
   3  -3   1    3.80    1.20
   3  -3   1    4.30    0.90
   3  -3   1    5.20    1.20
  -3  -3  -1    5.30    0.80
  -3   3  -1    5.90    1.10
   3   3   1    4.70    1.00
   3   3   1    4.40    1.00
   3   3   1    5.60    0.80
   3   3   1    5.50    0.90
   3   3   1    3.30    1.50
  -3   3  -1    3.40    1.00
  -3   3  -1    3.40    1.20
  -3   3  -1    4.60    0.80
  -4  -3  -1  635.64   17.50
   4  -3   1  594.54   18.40
  -4  -3  -1  650.63   17.90
   4  -3   1  634.14   17.50
  -4  -3  -1  624.94   17.40
   4  -3   1  637.34   17.50
   4  -3   1  634.24   17.90
   4  -3   1  665.73   18.10
  -4   3  -1  632.24   18.00
  -4   3  -1  649.54   18.10
   4   3   1  628.24   18.70
   4   3   1  653.13   17.30
   4   3   1  644.94   17.40
  -4   3  -1  645.94   17.80
   4   3   1  629.04   17.40
   4   3   1  631.34   17.90
  -4   3  -1  638.24   17.50
  -5  -3  -1  860.61   23.70
  -5  -3  -1  867.81   24.10
   5  -3   1  874.01   24.10
   5  -3   1  884.01   23.80
   5  -3   1  861.11   24.20
   5  -3   1  882.91   23.80
  -5  -3  -1  865.01   23.70
   5   3   1  861.91   25.00
  -5   3  -1  882.91   24.20
  -5   3  -1  867.11   24.20
  -5   3  -1  874.21   23.80
   5   3   1  876.11   24.10
   5   3   1  860.21   23.30
   5   3   1  872.91   23.70
  -5   3  -1  889.61   24.30
  -5   3  -1  873.11   23.70
   5   3   1  880.71   23.70
  -6  -3  -1   55.89    3.40
   6  -3   1   57.69    3.10
   6  -3   1   57.89    3.30
  -6  -3  -1   53.79    2.90
   6  -3   1   56.69    3.50
  -6  -3  -1   58.99    3.00
   6  -3   1   52.99    3.00
   6   3   1   55.49    3.20
   6   3   1   58.69    2.50
  -6   3  -1   56.29    3.00
  -6   3  -1   60.89    3.60
  -6   3  -1   61.59    3.50
   6   3   1   53.59    3.00
   6   3   1   58.79    4.50
   6   3   1   56.19    3.00
  -6   3  -1   57.99    3.10
   7  -3   1   94.89    4.30
   7  -3   1   86.39    4.30
  -7  -3  -1   90.59    4.20
  -7  -3  -1   89.29    4.20
  -7  -3  -1   94.39    4.50
   7  -3   1   96.49    4.70
   7  -3   1   87.99    4.10
  -7   3  -1   93.39    4.70
   7   3   1   93.49    5.80
  -7   3  -1   96.99    4.70
   7   3   1   94.49    3.40
  -7   3  -1   89.99    4.20
   7   3   1   91.69    4.20
   7   3   1   93.99    4.40
  -7   3  -1  103.09    4.30
   7   3   1   92.89    4.10
  -8  -3  -1   46.70    3.30
   8  -3   1   43.90    2.30
  -8  -3  -1   52.19    3.40
  -8  -3  -1   40.00    4.00
   8  -3   1   47.50    3.90
   8  -3   1   48.60    3.50
  -8  -3  -1   52.39    3.60
   8  -3   1   50.49    3.40
   8  -3   1   53.09    3.50
  -8   3  -1   47.40    3.50
   8   3   1   49.20    2.30
   8   3   1   54.29    3.50
   8   3   1   43.00    3.20
  -8   3  -1   45.50    3.90
  -8   3  -1   46.30    3.40
  -8   3  -1   52.79    3.80
   8   3   1   49.10    5.10
   8   3   1   49.30    3.30
   9  -3   1   88.29    5.50
   9  -3   1   92.99    3.50
   9  -3   1   89.69    4.90
  -9  -3  -1   97.89    4.80
   9  -3   1   91.49    4.80
  -9  -3  -1   88.79    5.00
   9  -3   1   90.99    4.80
  -9  -3  -1   94.19    4.90
   9   3   1   95.19    3.30
   9   3   1   95.09    6.80
   9   3   1   95.79    4.90
  -9   3  -1   97.89    5.50
  -9   3  -1   96.09    5.00
  -9   3  -1   90.59    5.30
  -9   3  -1   96.09    4.80
 -10  -3  -1   25.60    3.00
 -10  -3  -1   26.40    3.50
 -10  -3  -1   30.70    4.10
  10  -3   1   31.40    2.20
  10  -3   1   35.40    4.50
  10  -3   1   38.40    4.00
  10  -3   1   32.10    3.70
  10  -3   1   30.40    3.60
  10   3   1   26.40    3.50
 -10   3  -1   23.90    3.80
 -10   3  -1   28.70    3.60
 -10   3  -1   29.00    3.40
 -10   3  -1   32.00    3.60
  11  -3   1   27.80    3.60
 -11  -3  -1   39.30    4.00
  11  -3   1   29.80    3.90
  11  -3   1   28.00    3.60
  11  -3   1   32.30    3.00
 -11  -3  -1   32.70    3.70
  11  -3   1   26.90    3.90
  11   3   1   33.80    3.90
 -11   3  -1   38.20    4.20
 -11   3  -1   31.70    4.00
 -11   3  -1   30.60    4.10
 -12  -3  -1   36.10    4.20
  12  -3   1   33.30    4.30
  12  -3   1   36.30    4.60
 -12   3  -1   35.80    4.50
  12   3   1   31.60    3.80
 -12   3  -1   35.90    4.20
 -12   3  -1   28.50    3.60
 -13  -3  -1   -3.10    2.50
 -13  -3  -1   -0.40    2.80
  13  -3   1   -1.60    1.50
  13   3   1    0.00    2.60
 -13   3  -1   -1.60    3.20
 -13   3  -1   -2.90    2.90
 -13   3  -1   -4.20    2.70
 -14  -3  -1    6.00    3.50
 -14  -3  -1    5.30    3.40
 -14   3  -1    9.60    3.80
 -14   3  -1    4.40    3.80
 -14   3  -1   11.70    3.90
  14   3   1    9.30    3.30
  14   3   1    5.60    5.80
 -15  -3  -1   27.30    4.60
 -15  -3  -1   40.40    5.40
 -15   3  -1   35.60    5.50
  15   3   1   46.20    6.00
  15   3   1   53.19    8.80
 -15   3  -1   43.10    5.80
 -16  -3  -1   -3.90    4.20
 -16  -3  -1    2.00    4.10
 -16   3  -1    7.80    5.00
  16   3   1    3.50    3.90
  16   3   1    1.10    7.50
 -16   3  -1    8.30    4.50
 -16  -4   1   -4.10    3.80
 -16  -4   1    4.30    4.00
  16  -4  -1   -6.80    5.20
  16   4  -1    8.80    7.20
 -16   4   1    4.10    4.80
  16   4  -1   -0.70    4.00
 -16   4   1   -4.70    4.30
 -15  -4   1    7.30    3.70
  15  -4  -1    7.70    5.20
 -15  -4   1    4.20    3.60
 -15   4   1    7.00    4.20
  15   4  -1   10.40    5.80
 -15   4   1    5.80    4.10
  15   4  -1   14.70    4.20
  14  -4  -1    3.30    2.30
  14  -4  -1    3.60    4.10
 -14  -4   1    2.00    2.90
 -14  -4   1   -3.10    2.80
 -14   4   1    0.40    3.00
 -14   4   1   -0.10    3.30
  14   4  -1   -4.20    5.30
 -14   4   1    1.30    3.80
  14   4  -1    3.40    3.10
  13  -4  -1    2.00    2.10
 -13  -4   1    1.40    2.40
  13  -4  -1   -4.70    3.30
 -13  -4   1   -1.80    2.60
 -13   4   1   -0.90    3.00
 -13   4   1    0.00    2.80
  13   4  -1    8.40    4.80
 -13   4   1    0.00    2.50
 -12  -4   1    0.70    2.10
  12  -4  -1    4.40    3.00
  12  -4  -1   -1.30    3.30
  12  -4  -1    3.50    1.90
 -12  -4   1   -1.40    1.90
 -12   4   1   -0.40    2.70
 -12   4   1   -1.80    2.30
  12   4  -1   -1.90    4.00
 -12   4   1    2.20    2.20
  12   4  -1    1.30    2.50
 -11  -4   1  214.08    8.20
  11  -4  -1  204.98    9.50
  11  -4  -1  217.28    8.80
  11  -4  -1  211.08    8.70
  11  -4  -1  205.38    7.40
 -11  -4   1  214.78    8.30
  11   4  -1  207.58   10.70
 -11   4   1  218.38    8.60
  11   4  -1  214.88    8.60
 -11   4   1  219.38    8.50
 -11   4   1  200.58    9.10
 -10  -4   1  189.48    7.30
  10  -4  -1  201.38    8.00
  10  -4  -1  199.38    8.80
 -10  -4   1  192.48    7.50
  10  -4  -1  185.68    7.80
 -10   4   1  186.28    8.20
  10   4  -1  190.68    9.60
 -10   4   1  194.18    7.70
 -10   4   1  202.48    7.90
  10   4  -1  183.18    7.70
  -9  -4   1  162.68    6.30
   9  -4  -1  172.68    6.70
  -9  -4   1  151.28    7.10
   9  -4  -1  155.88    6.70
   9  -4  -1  172.98    7.60
  -9  -4   1  159.98    6.30
   9  -4  -1  159.88    6.60
   9   4  -1  158.58    6.80
  -9   4   1  160.18    6.50
  -9   4   1  154.88    7.00
  -9   4   1  156.08    7.50
  -9   4   1  155.58    6.60
  -9   4   1  158.38    6.50
   9   4  -1  164.28    8.30
   8  -4  -1   32.80    3.10
   8  -4  -1   37.10    3.40
  -8  -4   1   36.10    2.80
   8  -4  -1   32.00    3.90
   8  -4  -1   32.20    3.10
  -8  -4   1   31.30    3.90
  -8  -4   1   37.10    2.80
  -8  -4   1   33.60    3.80
   8   4  -1   27.60    2.60
   8   4  -1   33.80    3.20
  -8   4   1   33.40    3.90
  -8   4   1   39.30    3.50
  -8   4   1   30.90    3.20
  -8   4   1   38.50    3.10
   8   4  -1   36.90    3.00
  -8   4   1   32.10    3.00
   8   4  -1   34.60    4.50
   7  -4  -1    0.10    1.80
  -7  -4   1    1.30    1.20
   7  -4  -1    0.80    1.70
   7  -4  -1    1.10    1.30
  -7  -4   1    1.60    1.20
   7  -4  -1    0.70    1.40
  -7   4   1    2.40    1.20
   7   4  -1    0.60    0.60
  -7   4   1    0.10    1.50
   7   4  -1    1.90    1.30
   7   4  -1    2.50    1.20
   7   4  -1    1.00    1.60
  -7   4   1    1.00    1.20
   7   4  -1    0.40    2.10
  -7   4   1    0.60    1.50
  -7   4   1    0.00    1.80
   6  -4  -1   27.60    2.40
  -6  -4   1   19.00    2.50
   6  -4  -1   22.30    3.10
   6  -4  -1   23.90    2.80
  -6  -4   1   17.20    1.80
   6  -4  -1   19.20    2.20
  -6  -4   1   16.60    1.80
   6   4  -1   20.30    1.40
   6   4  -1   27.00    3.40
  -6   4   1   25.70    2.90
   6   4  -1   17.50    2.40
   6   4  -1   17.70    2.00
  -6   4   1   19.80    2.50
  -6   4   1   23.10    2.10
   6   4  -1   21.50    1.90
  -6   4   1   24.60    2.70
  -5  -4   1   59.99    2.70
  -5  -4   1   58.99    2.70
  -5  -4   1   69.59    2.90
  -5  -4   1   64.39    3.60
   5   4  -1   62.89    2.80
  -5   4   1   66.99    3.60
   5   4  -1   60.69    3.40
   5   4  -1   70.59    4.30
  -5   4   1   68.79    3.80
   5   4  -1   66.49    2.70
   5   4  -1   62.89    2.60
   4  -4  -1  176.08    6.90
  -4  -4   1  182.68    5.70
  -4  -4   1  175.48    5.40
   4  -4  -1  174.58    5.70
   4  -4  -1  178.08    5.70
  -4  -4   1  180.18    5.40
  -4  -4   1  177.48    6.10
  -4  -4   1  189.68    7.00
  -4  -4   1  180.38    6.40
   4  -4  -1  180.98    6.60
   4  -4  -1  172.78    6.40
   4   4  -1  177.68    6.80
  -4   4   1  172.98    5.60
  -4   4   1  174.88    6.30
  -4   4   1  176.38    5.70
   4   4  -1  181.78    5.40
   4   4  -1  167.08    6.20
   4   4  -1  179.08    5.50
   4   4  -1  180.98    5.40
  -4   4   1  177.68    6.40
  -4   4   1  176.28    6.30
  -3  -4   1  208.38    6.30
   3  -4  -1  191.28    6.80
   3  -4  -1  203.18    6.10
  -3  -4   1  196.68    7.20
   3  -4  -1  201.08    6.10
   3  -4  -1  197.68    6.90
  -3  -4   1  190.68    5.60
   3  -4  -1  197.98    7.30
  -3  -4   1  199.48    6.50
  -3  -4   1  194.68    6.70
   3  -4  -1  201.68    6.70
  -3   4   1  198.48    6.70
   3   4  -1  217.88    5.70
   3   4  -1  202.68    5.70
   3   4  -1  191.98    7.00
  -3   4   1  196.88    5.90
  -3   4   1  195.78    6.00
  -3   4   1  194.48    6.80
   3   4  -1  186.28    6.60
  -3   4   1  191.48    6.60
  -2  -4   1  370.36    9.80
   2  -4  -1  375.36   11.60
   2  -4  -1  359.36   11.10
   2  -4  -1  369.26   10.80
  -2  -4   1  368.06   10.70
   2  -4  -1  362.06   11.10
   2  -4  -1  366.66   10.20
   2  -4  -1  365.16   10.80
   2  -4  -1  368.16   10.20
  -2  -4   1  402.56   11.00
  -2  -4   1  360.56   11.30
   2   4  -1  371.66    9.80
  -2   4   1  365.26   10.20
  -2   4   1  368.66   10.80
   2   4  -1  353.96    9.70
   2   4  -1  339.87   11.10
  -2   4   1  355.26   10.00
   2   4  -1  369.96   10.60
  -2   4   1  364.86   10.90
  -2   4   1  368.96   11.10
  -2   4   1  339.87   10.10
   2   4  -1  418.36   11.10
  -1  -4   1  189.68    6.10
   1  -4  -1  181.98    6.60
   1  -4  -1  185.58    5.10
  -1  -4   1  178.98    5.90
   1  -4  -1  181.68    6.30
   1  -4  -1  184.98    5.30
  -1  -4   1  178.08    5.90
  -1  -4   1  189.98    6.50
   1  -4  -1  171.48    6.10
   1  -4  -1  179.18    6.00
  -1  -4   1  177.18    5.90
  -1   4   1  175.98    5.80
  -1   4   1  190.18    5.30
  -1   4   1  174.68    6.10
  -1   4   1  184.78    5.10
  -1   4   1  187.08    5.20
   1   4  -1  178.28    6.40
  -1   4   1  182.58    6.60
   1   4  -1  178.38    6.00
   1   4  -1  174.58    6.00
  -1   4   1  184.08    6.00
   1   4  -1  175.48    5.90
   0  -4   1  512.65   14.10
   0  -4  -1  504.45   14.30
   0  -4  -1  511.85   14.20
   0  -4   1  494.65   13.90
   0  -4   1  510.95   14.20
   0  -4  -1  502.85   14.40
   0  -4  -1  501.05   14.80
   0  -4  -1  508.95   13.80
   0  -4  -1  496.25   13.30
   0  -4   1  510.95   14.60
   0  -4   1  477.75   14.00
   0   4   1  486.55   14.20
   0   4   1  493.85   14.70
   0   4   1  443.46   14.10
   0   4  -1  484.85   14.00
   0   4   1  508.45   13.20
   0   4   1  498.15   13.20
   0   4  -1  500.95   14.10
   0   4  -1  483.35   14.50
   0   4  -1  491.65   14.10
   0   4   1  497.95   13.30
  -1  -4  -1   31.70    2.20
   1  -4   1   28.30    2.60
  -1  -4  -1   30.40    1.70
   1  -4   1   32.20    2.30
   1  -4   1   32.20    2.20
  -1  -4  -1   29.70    2.20
   1  -4   1   28.70    2.00
  -1  -4  -1   30.70    1.50
   1  -4   1   29.70    1.30
  -1  -4  -1   34.70    2.40
  -1  -4  -1   29.00    1.40
  -1  -4  -1   33.10    2.80
   1   4   1   31.50    1.40
  -1   4  -1   29.40    1.90
  -1   4  -1   28.90    2.20
   1   4   1   32.60    2.10
  -1   4  -1   29.40    1.20
   1   4   1   30.20    1.40
   1   4   1   34.70    2.70
  -1   4  -1   25.40    2.00
   1   4   1   33.30    1.30
   1   4   1   31.50    1.90
   1   4   1   31.10    2.30
  -1   4  -1   31.60    1.20
  -2  -4  -1  277.07    7.90
   2  -4   1  270.97    7.60
   2  -4   1  280.27    9.00
  -2  -4  -1  276.77    8.40
   2  -4   1  272.87    7.50
  -2  -4  -1  268.37    7.60
  -2  -4  -1  273.77    8.50
   2  -4   1  250.97    8.40
   2  -4   1  262.07    8.30
   2  -4   1  266.47    8.60
  -2  -4  -1  265.97    9.10
   2  -4   1  271.37    7.90
  -2  -4  -1  277.57    7.60
  -2   4  -1  269.07    7.50
   2   4   1  269.37    7.60
  -2   4  -1  258.37    8.40
   2   4   1  268.67    9.10
  -2   4  -1  277.17    8.10
   2   4   1  267.07    7.50
   2   4   1  269.27    8.20
  -2   4  -1  259.77    8.50
   2   4   1  253.97    8.40
   3  -4   1  284.37    8.10
   3  -4   1  276.67    9.00
   3  -4   1  283.47    9.00
  -3  -4  -1  285.27    8.90
  -3  -4  -1  288.87    8.20
  -3  -4  -1  285.97    8.30
  -3  -4  -1  287.47    9.70
   3  -4   1  277.97    8.10
  -3  -4  -1  277.17    8.10
   3  -4   1  282.57    8.90
   3  -4   1  292.77    8.20
   3   4   1  265.47    9.50
  -3   4  -1  273.77    9.10
  -3   4  -1  266.07    8.90
   3   4   1  288.57    8.10
   3   4   1  280.07    8.50
  -3   4  -1  283.37    9.00
  -3   4  -1  286.17    8.20
   3   4   1  291.97    8.10
   3   4   1  283.07    9.00
  -3   4  -1  280.67    8.10
  -4  -4  -1  152.08    4.90
  -4  -4  -1  145.99    5.00
   4  -4   1  148.99    5.50
   4  -4   1  140.19    5.60
  -4  -4  -1  148.59    5.60
   4  -4   1  148.19    4.70
   4  -4   1  145.69    4.90
   4  -4   1  148.39    5.70
   4  -4   1  144.79    4.90
  -4  -4  -1  150.88    4.90
  -4  -4  -1  149.88    6.50
  -4   4  -1  140.39    4.80
  -4   4  -1  149.88    5.70
  -4   4  -1  151.48    4.90
   4   4   1  151.88    4.90
   4   4   1  135.69    6.20
   4   4   1  133.79    5.50
  -4   4  -1  144.89    5.70
  -4   4  -1  154.58    5.40
   4   4   1  147.59    4.80
   5  -4   1  795.42   21.10
  -5  -4  -1  773.82   22.20
  -5  -4  -1  783.12   21.60
   5  -4   1  794.62   21.60
  -5  -4  -1  787.12   21.50
   5  -4   1  773.72   22.30
   5  -4   1  803.72   22.20
   5  -4   1  784.72   21.60
   5   4   1  790.82   21.30
  -5   4  -1  794.52   21.60
   5   4   1  769.82   22.20
   5   4   1  771.72   21.50
   5   4   1  788.82   23.20
  -5   4  -1  776.62   22.30
  -5   4  -1  800.02   22.10
  -5   4  -1  793.92   22.30
   5   4   1  788.82   21.50
  -6  -4  -1  102.39    4.80
   6  -4   1  101.79    4.90
   6  -4   1  103.39    4.30
   6  -4   1  105.59    4.30
  -6  -4  -1  100.89    4.20
  -6  -4  -1  102.29    4.30
   6  -4   1  104.49    4.80
   6   4   1  104.69    3.80
   6   4   1  108.49    4.30
  -6   4  -1  104.39    4.90
  -6   4  -1  104.19    4.90
  -6   4  -1  104.69    4.30
   6   4   1  105.69    5.90
  -6   4  -1   99.79    4.90
   6   4   1  103.59    4.80
   6   4   1  104.09    4.20
  -6   4  -1   96.19    4.30
   7  -4   1  106.19    4.60
  -7  -4  -1  100.89    4.50
  -7  -4  -1  105.99    5.10
   7  -4   1  106.69    5.20
   7  -4   1  110.29    4.70
  -7  -4  -1  105.39    4.50
   7  -4   1  101.69    5.00
   7   4   1  105.09    3.80
  -7   4  -1  103.99    4.50
   7   4   1  103.89    5.00
   7   4   1  105.49    6.30
  -7   4  -1  106.59    5.30
  -7   4  -1  106.89    4.60
  -7   4  -1  102.29    5.20
   7   4   1   97.99    4.40
   7   4   1  103.29    4.50
  -8  -4  -1   15.50    2.30
   8  -4   1   11.70    2.10
   8  -4   1   19.10    2.90
   8  -4   1   12.70    2.40
  -8  -4  -1   13.70    2.10
  -8  -4  -1   13.50    2.60
   8  -4   1   13.30    2.20
  -8   4  -1   16.30    2.90
   8   4   1   15.30    2.60
  -8   4  -1   12.10    2.10
  -8   4  -1   13.00    2.00
   8   4   1   12.70    1.60
  -8   4  -1   15.20    2.60
   8   4   1   13.90    3.40
  -9  -4  -1   22.40    4.10
   9  -4   1   26.80    3.30
   9  -4   1   28.60    3.60
   9  -4   1   31.40    4.20
   9  -4   1   26.90    3.20
  -9  -4  -1   22.80    2.80
  -9  -4  -1   23.00    2.80
   9  -4   1   22.80    2.00
  -9   4  -1   30.50    3.90
   9   4   1   24.00    4.60
  -9   4  -1   29.80    3.70
   9   4   1   22.00    1.60
   9   4   1   22.80    3.20
  -9   4  -1   21.50    2.60
  -9   4  -1   23.60    2.90
  10  -4   1  184.38    8.30
 -10  -4  -1  178.58    7.40
  10  -4   1  194.68    7.80
 -10  -4  -1  184.88    7.50
  10  -4   1  169.78    7.60
  10  -4   1  173.88    5.60
 -10   4  -1  176.28    8.60
  10   4   1  172.98    7.60
  10   4   1  186.08    9.80
 -10   4  -1  186.48    7.60
 -10   4  -1  175.78    8.10
 -10   4  -1  174.08    7.60
  11  -4   1   19.10    3.40
 -11  -4  -1   21.00    3.10
  11  -4   1   14.30    3.40
  11  -4   1   19.40    3.90
 -11   4  -1   20.20    3.10
  11   4   1   18.50    3.20
 -11   4  -1   21.00    4.00
  11   4   1   24.70    5.30
 -11   4  -1   15.60    3.20
  12  -4   1   32.70    4.70
  12  -4   1   36.40    2.40
 -12  -4  -1   33.70    4.10
 -12  -4  -1   38.80    4.80
 -12   4  -1   30.10    4.30
 -12   4  -1   39.60    5.10
  12   4   1   44.60    4.80
 -12   4  -1   37.80    4.20
  12   4   1   46.80    7.00
 -13  -4  -1   -0.10    3.00
 -13  -4  -1    6.40    3.10
  13  -4   1    3.60    3.80
  13   4   1   -1.10    5.30
 -13   4  -1    2.10    3.20
 -13   4  -1    2.70    3.20
 -13   4  -1   -2.70    3.30
 -14  -4  -1   28.80    4.50
 -14  -4  -1   21.20    4.40
  14   4   1   16.50    6.80
 -14   4  -1   27.20    5.00
 -14   4  -1   28.30    5.00
  14   4   1   28.40    4.50
 -15  -4  -1   16.50    4.50
 -15  -4  -1   13.50    4.10
 -15   4  -1   18.10    5.00
  15   4   1   16.20    4.40
 -15   4  -1   23.60    5.30
  15   4   1   20.60    6.90
 -16  -4  -1    1.60    4.20
 -16  -4  -1    8.80    4.70
  16   4   1   22.90    8.70
  16   4   1    8.40    4.80
 -16   4  -1   10.90    5.40
 -16   4  -1   15.00    5.70
  16  -5  -1   15.60    6.40
 -16  -5   1   12.10    4.70
 -16  -5   1   12.10    4.30
  16   5  -1   23.80    5.20
 -16   5   1   20.40    5.70
 -16   5   1    2.90    5.10
  16   5  -1   20.30    7.80
 -15  -5   1    6.90    3.70
  15  -5  -1   10.70    5.50
 -15  -5   1    1.70    3.60
  15   5  -1    4.10    6.50
  15   5  -1    9.90    4.30
 -15   5   1   10.60    4.90
 -15   5   1    1.90    4.30
 -14  -5   1   -1.50    2.90
 -14  -5   1    6.00    3.30
  14  -5  -1   -2.70    4.30
 -14   5   1    0.50    5.60
 -14   5   1   -2.00    3.60
  14   5  -1    6.50    5.90
  14   5  -1    2.70    3.60
  13  -5  -1    2.00    2.10
  13  -5  -1    1.70    4.00
 -13  -5   1    4.40    2.80
 -13  -5   1   -2.10    2.60
 -13   5   1    3.70    4.00
 -13   5   1    2.80    3.40
 -13   5   1    4.90    3.60
  13   5  -1    5.20    4.90
  13   5  -1   -0.50    3.10
  12  -5  -1    5.60    3.70
 -12  -5   1   17.00    3.00
 -12  -5   1    9.20    2.80
  12  -5  -1    6.60    2.30
  12  -5  -1    6.00    3.70
 -12   5   1   10.20    3.40
 -12   5   1   12.80    3.30
  12   5  -1    7.90    4.70
  12   5  -1    8.90    3.20
 -12   5   1   13.40    3.00
  11  -5  -1    7.40    3.30
  11  -5  -1   -3.90    2.80
 -11  -5   1    2.20    2.10
 -11   5   1    2.70    2.50
 -11   5   1    1.90    2.30
 -11   5   1    4.70    2.80
  11   5  -1   -1.50    2.40
  11   5  -1    1.70    4.30
  10  -5  -1  130.69    6.40
  10  -5  -1  117.39    7.30
  10  -5  -1  127.49    6.60
 -10  -5   1  133.09    5.80
 -10  -5   1  129.49    5.80
  10   5  -1  116.59    7.90
 -10   5   1  126.69    6.10
  10   5  -1  133.59    6.60
 -10   5   1  126.99    6.10
 -10   5   1  138.29    6.70
 -10   5   1  126.09    6.80
   9  -5  -1    0.30    2.10
   9  -5  -1    3.10    2.70
   9  -5  -1    2.60    2.00
  -9  -5   1    0.70    1.50
  -9  -5   1    1.70    1.50
  -9   5   1    3.70    2.90
  -9   5   1   -1.70    2.10
  -9   5   1    2.20    1.80
  -9   5   1   -0.50    1.80
   9   5  -1   -3.00    3.10
  -9   5   1    2.80    2.10
   9   5  -1   -1.10    1.90
  -8  -5   1   34.20    2.70
  -8  -5   1   30.20    2.70
   8  -5  -1   37.40    4.30
   8  -5  -1   29.00    3.80
   8  -5  -1   29.70    3.20
   8  -5  -1   26.60    3.30
  -8   5   1   30.50    3.00
   8   5  -1   33.00    4.50
   8   5  -1   29.00    3.40
   8   5  -1   33.90    3.50
  -8   5   1   34.50    3.70
  -8   5   1   30.10    3.10
  -8   5   1   34.70    3.90
  -8   5   1   39.30    4.30
  -7  -5   1   16.70    2.00
   7  -5  -1   22.50    3.30
   7  -5  -1   14.80    2.10
  -7  -5   1   13.20    2.90
   7  -5  -1   21.20    3.20
  -7  -5   1   19.40    2.10
   7  -5  -1   19.30    2.40
  -7   5   1   20.00    2.80
  -7   5   1   17.50    2.30
  -7   5   1   17.70    2.20
  -7   5   1   19.10    2.80
   7   5  -1   19.90    2.30
   7   5  -1   15.70    1.60
   7   5  -1   16.90    2.10
  -7   5   1   20.70    3.00
   7   5  -1   14.80    2.40
   7   5  -1   12.80    3.20
   6  -5  -1  498.45   15.60
  -6  -5   1  508.15   15.60
  -6  -5   1  506.45   14.40
   6  -5  -1  523.75   14.80
   6  -5  -1  529.85   15.90
  -6  -5   1  512.05   15.20
  -6  -5   1  510.75   14.30
   6  -5  -1  525.85   14.80
  -6   5   1  495.65   15.40
   6   5  -1  519.55   14.50
  -6   5   1  519.15   15.60
   6   5  -1  493.05   15.40
   6   5  -1  447.16   14.50
   6   5  -1  501.15   14.30
  -6   5   1  520.25   14.70
   6   5  -1  501.45   16.20
  -6   5   1  526.35   15.60
   5  -5  -1  440.96   14.10
  -5  -5   1  388.46   12.80
  -5  -5   1  421.26   12.70
   5  -5  -1  420.06   13.30
  -5  -5   1  421.76   11.90
   5  -5  -1  430.46   12.30
   5  -5  -1  425.96   12.30
  -5  -5   1  427.16   14.00
  -5  -5   1  420.56   13.20
  -5  -5   1  425.06   11.90
   5  -5  -1  414.96   13.40
  -5   5   1  426.96   13.10
   5   5  -1  415.96   13.70
  -5   5   1  408.56   13.00
  -5   5   1  425.76   12.20
  -5   5   1  430.06   12.20
   5   5  -1  421.36   13.10
   5   5  -1  429.76   11.90
   5   5  -1  426.46   12.10
  -5   5   1  418.16   13.10
   5   5  -1  432.66   12.00
  -4  -5   1 1714.13   46.10
   4  -5  -1 1723.13   45.60
  -4  -5   1 1762.32   47.30
  -4  -5   1 1687.83   45.20
  -4  -5   1 1769.02   46.60
   4  -5  -1 1693.03   47.30
  -4  -5   1 1734.63   45.10
   4  -5  -1 1698.13   45.60
  -4  -5   1 1746.53   45.90
   4  -5  -1 1685.23   46.70
   4  -5  -1 1744.03   46.00
   4  -5  -1 1757.92   46.80
   4   5  -1 1742.23   45.20
  -4   5   1 1698.83   46.60
   4   5  -1 1719.33   47.10
  -4   5   1 1753.42   45.50
   4   5  -1 1705.03   45.70
  -4   5   1 1712.33   46.40
   4   5  -1 1731.33   46.50
  -4   5   1 1740.63   45.50
  -4   5   1 1741.33   46.40
   4   5  -1 1736.83   45.10
   3  -5  -1   49.60    2.40
   3  -5  -1   46.80    2.90
  -3  -5   1   46.30    3.10
  -3  -5   1   47.50    2.80
   3  -5  -1   50.59    2.40
  -3  -5   1   52.59    3.90
   3  -5  -1   54.79    3.90
  -3  -5   1   46.80    1.80
   3  -5  -1   51.99    3.30
   3  -5  -1   49.60    3.20
  -3  -5   1   49.80    2.90
   3  -5  -1   45.30    3.10
   3   5  -1   44.30    3.50
  -3   5   1   49.70    2.20
   3   5  -1   53.49    2.00
  -3   5   1   44.70    2.90
   3   5  -1   42.20    3.00
  -3   5   1   47.20    3.30
  -3   5   1   47.80    2.30
   3   5  -1   48.70    2.70
   3   5  -1   49.80    1.80
  -3   5   1   50.69    2.40
  -3   5   1   49.50    3.10
   2  -5  -1    6.80    1.50
   2  -5  -1    6.00    1.60
   2  -5  -1    6.40    1.90
  -2  -5   1    6.10    2.10
   2  -5  -1    7.80    1.00
  -2  -5   1   10.50    1.70
  -2  -5   1    5.70    1.60
  -2  -5   1    9.50    1.60
   2  -5  -1    7.00    1.10
   2  -5  -1    7.60    1.50
   2  -5  -1   10.70    2.30
   2   5  -1    7.30    1.50
   2   5  -1    6.30    1.50
  -2   5   1    8.70    1.00
  -2   5   1    6.00    1.40
  -2   5   1    7.70    1.10
   2   5  -1    9.20    2.10
  -2   5   1    7.80    1.80
  -2   5   1    8.20    1.00
  -2   5   1    9.30    1.60
   2   5  -1    8.50    1.70
  -1  -5   1   55.19    2.90
  -1  -5   1   53.29    3.20
  -1  -5   1   57.39    3.00
   1  -5  -1   60.09    3.20
   1  -5  -1   53.29    3.40
   1  -5  -1   55.39    2.20
  -1  -5   1   54.89    2.90
   1  -5  -1   56.29    2.90
   1  -5  -1   53.19    3.20
  -1  -5   1   61.39    3.80
   1  -5  -1   60.79    3.90
  -1   5   1   56.59    2.00
   1   5  -1   54.99    3.10
   1   5  -1   51.89    3.50
   1   5  -1   53.39    3.00
  -1   5   1   54.19    2.80
  -1   5   1   51.99    3.70
   1   5  -1   55.59    3.10
  -1   5   1   59.49    3.30
  -1   5   1   59.79    2.30
  -1   5   1   56.99    2.00
   0  -5   1  132.29    4.80
   0  -5   1  126.19    5.10
   0  -5   1  124.69    5.50
   0  -5  -1  129.49    5.20
   0  -5  -1  128.19    4.60
   0  -5   1  126.09    4.80
   0  -5   1  129.59    4.80
   0  -5  -1  128.79    5.70
   0  -5  -1  133.09    5.00
   0  -5  -1  120.19    5.00
   0   5  -1  127.19    4.90
   0   5  -1  127.59    5.50
   0   5  -1  125.89    4.90
   0   5   1  129.59    3.70
   0   5   1  125.29    5.60
   0   5  -1  117.99    4.80
   0   5   1  131.19    3.70
   0   5   1  123.69    3.90
   0   5   1  132.59    3.90
   0   5   1  121.99    4.60
   0   5   1  119.09    4.90
  -1  -5  -1  930.71   25.30
  -1  -5  -1  882.21   24.10
  -1  -5  -1  913.31   24.70
   1  -5   1  921.61   24.90
   1  -5   1  935.31   26.00
   1  -5   1  895.31   25.40
   1  -5   1  946.91   25.30
  -1  -5  -1  878.41   25.40
  -1  -5  -1  948.41   25.50
  -1  -5  -1  900.51   26.10
   1  -5   1  915.21   25.10
  -1   5  -1  909.21   23.90
   1   5   1  932.41   25.30
   1   5   1  914.31   24.10
   1   5   1  927.81   24.00
  -1   5  -1  903.01   25.20
  -1   5  -1  927.11   25.50
   1   5   1  905.31   24.90
   1   5   1  924.71   23.90
   1   5   1  883.51   26.00
   2  -5   1 2046.50   55.09
  -2  -5  -1 2039.40   53.99
  -2  -5  -1 2094.79   55.29
   2  -5   1 2088.39   55.29
   2  -5   1 2080.89   55.89
   2  -5   1 2050.49   53.99
   2  -5   1 2066.29   54.09
  -2  -5  -1 2101.39   55.49
  -2  -5  -1 2128.39   56.19
  -2  -5  -1 2067.39   54.59
   2  -5   1 2115.69   55.49
  -2  -5  -1 2132.19   55.29
   2  -5   1 2143.39   54.69
  -2  -5  -1 2037.50   54.19
   2   5   1 2080.29   55.09
  -2   5  -1 2108.29   55.49
  -2   5  -1 2046.80   54.79
  -2   5  -1 2070.89   55.29
   2   5   1 2082.59   55.99
  -2   5  -1 2047.80   53.89
   2   5   1 2018.80   55.39
   2   5   1 2075.99   53.99
   2   5   1 2050.09   54.09
   3  -5   1    8.80    1.10
  -3  -5  -1   10.30    1.40
   3  -5   1   12.10    1.90
   3  -5   1   11.40    1.50
  -3  -5  -1   12.70    2.80
  -3  -5  -1   10.30    1.20
   3  -5   1   10.40    1.90
   3  -5   1   11.60    2.00
  -3  -5  -1    9.80    1.10
   3  -5   1    8.60    1.10
   3  -5   1   13.60    2.60
  -3  -5  -1   13.90    2.20
  -3  -5  -1    7.20    1.90
   3   5   1   10.00    1.20
  -3   5  -1    8.80    1.90
   3   5   1    9.80    2.10
   3   5   1    5.00    2.10
  -3   5  -1   11.10    1.20
   3   5   1   13.10    1.80
  -3   5  -1    9.50    1.10
  -3   5  -1    9.70    1.60
  -3   5  -1   13.40    2.10
   3   5   1   12.20    1.30
  -4  -5  -1  113.59    5.00
   4  -5   1  113.39    4.90
   4  -5   1  113.89    4.20
  -4  -5  -1  112.59    6.00
  -4  -5  -1  111.99    4.30
  -4  -5  -1  110.19    4.00
   4  -5   1  110.49    4.10
   4  -5   1  114.69    4.10
  -4  -5  -1  119.19    4.10
   4  -5   1  117.09    5.80
   4  -5   1  109.89    5.10
   4  -5   1  112.19    5.10
   4   5   1  111.99    4.40
  -4   5  -1  112.59    4.70
   4   5   1  102.99    5.80
   4   5   1  114.89    4.10
  -4   5  -1  116.59    5.20
  -4   5  -1  110.89    4.10
  -4   5  -1  108.89    4.00
   4   5   1  103.99    5.00
  -4   5  -1  116.89    5.10
   4   5   1  112.89    3.90
   5  -5   1   24.50    3.00
   5  -5   1   23.10    2.80
  -5  -5  -1   23.00    2.00
   5  -5   1   21.10    2.10
   5  -5   1   21.90    2.10
  -5  -5  -1   16.90    2.20
  -5  -5  -1   23.70    3.00
  -5  -5  -1   18.00    1.90
  -5   5  -1   19.60    2.70
  -5   5  -1   23.10    2.90
  -5   5  -1   17.50    2.10
   5   5   1   19.00    3.10
   5   5   1   22.20    2.10
   5   5   1   20.00    1.90
   5   5   1   20.70    2.00
  -5   5  -1   22.90    2.00
  -5   5  -1   18.80    2.60
   5   5   1   22.10    2.90
   6  -5   1   13.60    1.80
   6  -5   1   11.50    1.80
  -6  -5  -1   13.30    1.80
  -6  -5  -1   12.80    2.00
  -6  -5  -1   10.30    1.70
   6  -5   1   15.10    2.50
   6  -5   1   11.80    1.80
   6  -5   1   12.70    2.30
  -6  -5  -1   11.10    2.30
   6   5   1   10.80    1.60
  -6   5  -1    9.80    2.20
  -6   5  -1    9.80    2.30
  -6   5  -1   11.90    2.20
   6   5   1   13.40    2.40
  -6   5  -1   13.10    2.40
   6   5   1   13.70    1.70
   6   5   1    9.60    3.10
   6   5   1   13.30    1.80
   7  -5   1  139.99    8.40
  -7  -5  -1  166.38    8.00
  -7  -5  -1  179.48    6.40
  -7  -5  -1  178.08    6.40
   7  -5   1  179.28    6.50
   7  -5   1  161.18    7.10
   7  -5   1  181.98    7.30
   7  -5   1  179.38    5.60
   7   5   1  172.48    8.50
   7   5   1  166.28    6.40
  -7   5  -1  173.88    7.30
   7   5   1  174.08    7.20
  -7   5  -1  166.98    6.30
  -7   5  -1  170.88    6.50
   7   5   1  171.98    5.70
  -7   5  -1  182.88    7.20
  -8  -5  -1  311.87   10.50
   8  -5   1  324.77   11.40
   8  -5   1  324.87   10.70
   8  -5   1  319.47    9.40
   8  -5   1  327.17   10.60
  -8  -5  -1  325.87   10.50
   8   5   1  328.67   12.90
  -8   5  -1  325.67   10.60
  -8   5  -1  325.07   11.40
   8   5   1  321.47   11.30
  -8   5  -1  334.47   11.50
   8   5   1  320.47    9.40
  -8   5  -1  313.87   10.60
  -9  -5  -1   29.20    3.50
   9  -5   1   34.00    4.00
  -9  -5  -1   27.10    3.30
   9  -5   1   33.30    4.60
   9  -5   1   30.80    3.70
   9  -5   1   30.00    2.20
  -9   5  -1   32.70    3.60
  -9   5  -1   32.70    4.60
  -9   5  -1   27.80    3.80
  -9   5  -1   30.60    3.60
   9   5   1   26.90    2.00
   9   5   1   27.20    4.70
   9   5   1   29.00    3.60
  10  -5   1   -5.80    2.70
  10  -5   1   -0.10    1.30
  10  -5   1    0.30    2.70
  10  -5   1    0.00    1.40
 -10  -5  -1    2.40    2.20
 -10  -5  -1    1.70    2.80
  10  -5   1    0.60    2.60
  10   5   1    5.80    2.70
 -10   5  -1    1.30    2.40
 -10   5  -1    0.30    2.30
 -10   5  -1    2.90    3.20
  11  -5   1   70.89    5.60
 -11  -5  -1   68.69    5.20
  11  -5   1   73.99    6.10
 -11  -5  -1   65.19    4.80
  11  -5   1   61.19    2.90
  11  -5   1   60.39    3.00
  11  -5   1   62.59    6.00
  11   5   1   64.79    7.30
 -11   5  -1   61.69    5.50
 -11   5  -1   71.59    6.80
 -11   5  -1   72.29    6.00
  11   5   1   70.49    5.50
 -12  -5  -1   34.70    4.10
  12  -5   1   32.90    5.10
 -12  -5  -1   38.90    5.00
  12   5   1   32.20    6.20
 -12   5  -1   36.60    4.50
  12   5   1   35.10    4.50
 -12   5  -1   29.30    3.90
 -12   5  -1   46.00    5.70
 -13  -5  -1    3.90    3.00
 -13  -5  -1    5.30    3.20
  13  -5   1   -3.80    3.80
 -13   5  -1   11.50    4.20
 -13   5  -1   -2.20    3.40
  13   5   1    4.60    3.40
  13   5   1   -0.30    5.00
 -14  -5  -1   11.60    3.70
 -14  -5  -1    6.80    3.70
  14  -5   1    6.80    4.60
 -14   5  -1    0.70    4.20
 -14   5  -1    9.10    4.20
  14   5   1    3.40    3.90
  14   5   1   10.90    6.40
 -15  -5  -1   -4.60    3.80
  15   5   1    5.40    6.90
 -15   5  -1    7.00    4.80
  15   5   1   -1.30    4.10
 -15   5  -1   -3.90    4.80
 -15  -6   1   13.40    4.10
 -15  -6   1   11.50    3.90
  15  -6  -1   11.20    6.10
  15   6  -1   17.40    6.90
 -15   6   1   11.50    5.20
  15   6  -1   11.20    4.90
 -15   6   1    9.60    4.70
 -14  -6   1   -2.50    3.00
  14  -6  -1    1.90    4.70
 -14  -6   1   -0.50    3.30
  14   6  -1    1.40    4.20
 -14   6   1   -1.60    4.10
  14   6  -1    3.40    5.90
 -13  -6   1   19.30    3.50
  13  -6  -1   25.40    5.40
 -13  -6   1   16.10    3.60
 -13   6   1   25.00    4.30
  13   6  -1   29.50    4.90
  13   6  -1   34.70    6.90
 -13   6   1   23.30    4.80
 -12  -6   1   50.09    4.90
 -12  -6   1   41.50    4.70
 -12   6   1   41.80    5.30
  12   6  -1   50.89    6.80
  12   6  -1   49.00    5.80
 -12   6   1   60.49    6.50
 -11  -6   1  108.19    5.70
 -11  -6   1  108.19    5.80
  11  -6  -1  103.69    7.70
  11  -6  -1  110.29    7.10
 -11   6   1  112.19    6.20
 -11   6   1  109.99    6.40
  11   6  -1  106.49    6.80
 -11   6   1  107.19    7.20
  11   6  -1  107.49    8.40
  10  -6  -1    0.00    2.80
  10  -6  -1   -2.80    3.00
 -10  -6   1    1.80    2.10
  10  -6  -1   -1.20    2.60
 -10  -6   1    2.00    1.90
 -10   6   1    2.90    2.90
 -10   6   1    0.10    2.20
 -10   6   1    0.10    2.80
  10   6  -1   -0.20    4.00
 -10   6   1    3.50    2.20
   9  -6  -1  142.89    6.60
   9  -6  -1  132.09    6.30
   9  -6  -1  136.99    7.50
  -9  -6   1  134.09    5.70
  -9  -6   1  127.79    5.60
  -9   6   1  129.39    6.00
  -9   6   1  132.69    6.10
  -9   6   1  135.29    7.10
   9   6  -1  133.89    7.00
   9   6  -1  132.49    8.10
  -9   6   1  122.99    6.90
   8  -6  -1   67.29    4.50
  -8  -6   1   64.99    3.70
   8  -6  -1   64.19    4.30
   8  -6  -1   71.09    5.50
  -8  -6   1   66.79    3.70
  -8  -6   1   64.19    4.70
  -8   6   1   68.69    5.00
   8   6  -1   64.39    6.00
  -8   6   1   73.69    5.50
   8   6  -1   64.99    4.90
  -8   6   1   58.39    4.90
  -8   6   1   65.19    4.10
   7  -6  -1   37.50    3.30
  -7  -6   1   38.10    2.60
   7  -6  -1   32.80    3.10
  -7  -6   1   38.60    2.70
   7  -6  -1   43.90    4.50
  -7  -6   1   33.50    3.60
   7  -6  -1   33.80    3.20
   7   6  -1   32.80    2.30
   7   6  -1   40.70    4.00
  -7   6   1   36.60    3.90
  -7   6   1   44.30    4.20
  -7   6   1   40.60    4.10
  -7   6   1   36.90    3.00
   7   6  -1   34.90    5.00
   7   6  -1   35.90    2.90
  -7   6   1   30.70    3.00
   6  -6  -1   46.80    3.20
  -6  -6   1   46.00    3.60
   6  -6  -1   48.00    3.20
  -6  -6   1   46.70    2.50
   6  -6  -1   48.20    3.20
  -6  -6   1   46.20    2.60
   6  -6  -1   45.10    4.40
   6   6  -1   42.80    2.60
   6   6  -1   49.50    3.90
   6   6  -1   44.50    4.80
  -6   6   1   46.30    3.10
   6   6  -1   49.70    2.80
  -6   6   1   44.80    3.90
   6   6  -1   43.30    2.60
  -6   6   1   44.90    4.00
  -6   6   1   47.90    2.90
  -6   6   1   42.90    4.00
  -5  -6   1  425.26   12.10
   5  -6  -1  442.96   12.60
   5  -6  -1  441.26   13.00
  -5  -6   1  424.86   14.70
   5  -6  -1  433.66   12.60
  -5  -6   1  408.56   13.70
   5  -6  -1  455.85   14.20
   5  -6  -1  415.76   14.60
  -5  -6   1  432.66   13.00
  -5  -6   1  442.06   12.00
  -5  -6   1  433.96   13.20
   5  -6  -1  392.66   13.70
   5   6  -1  440.16   12.20
  -5   6   1  434.26   12.50
  -5   6   1  425.96   13.50
   5   6  -1  430.36   13.70
   5   6  -1  430.66   12.00
   5   6  -1  435.76   12.70
   5   6  -1  437.66   14.50
  -5   6   1  437.46   13.60
  -5   6   1  436.86   12.40
  -5   6   1  422.86   13.70
   4  -6  -1    1.60    1.70
  -4  -6   1    0.00    0.70
  -4  -6   1    0.30    0.60
   4  -6  -1   -0.20    1.10
   4  -6  -1   -0.30    1.80
  -4  -6   1   -0.40    1.50
   4  -6  -1    0.30    1.40
  -4  -6   1   -0.30    2.40
   4  -6  -1   -0.50    2.40
  -4  -6   1   -0.10    1.40
  -4  -6   1    3.40    1.90
   4  -6  -1    0.10    1.10
   4   6  -1    0.80    1.20
   4   6  -1    0.00    0.60
   4   6  -1   -2.60    2.20
  -4   6   1    1.50    1.60
  -4   6   1   -1.00    1.50
   4   6  -1    1.80    0.90
  -4   6   1    6.00    2.00
  -4   6   1    0.80    0.90
  -4   6   1   -0.60    1.00
   4   6  -1    0.40    1.50
  -4   6   1    2.30    1.00
   3  -6  -1  204.58    7.70
  -3  -6   1  205.48    8.30
   3  -6  -1  199.18    7.70
   3  -6  -1  193.88    8.20
  -3  -6   1  196.68    7.00
   3  -6  -1  210.78    6.40
  -3  -6   1  190.98    7.40
   3  -6  -1  190.18    7.30
  -3  -6   1  198.18    5.70
  -3  -6   1  199.38    7.20
   3  -6  -1  197.88    7.10
   3  -6  -1  208.68    6.20
   3   6  -1  197.38    8.00
  -3   6   1  202.08    6.00
   3   6  -1  194.08    7.50
   3   6  -1  199.88    5.70
  -3   6   1  203.38    7.60
  -3   6   1  196.28    6.20
  -3   6   1  205.68    6.20
  -3   6   1  205.18    7.30
   3   6  -1  201.78    6.90
  -3   6   1  197.68    7.20
  -3   6   1  211.88    6.40
   2  -6  -1  404.16   13.20
   2  -6  -1  412.56   12.60
   2  -6  -1  409.76   12.60
  -2  -6   1  437.26   13.70
  -2  -6   1  406.06   12.40
  -2  -6   1  406.06   12.60
  -2  -6   1  399.96   12.70
   2  -6  -1  400.66   13.60
   2  -6  -1  403.56   13.00
   2  -6  -1  418.16   11.60
  -2  -6   1  419.86   12.70
  -2   6   1  417.86   12.70
   2   6  -1  418.96   12.50
  -2   6   1  399.86   12.90
  -2   6   1  413.86   12.50
  -2   6   1  409.06   11.30
  -2   6   1  426.16   11.60
   2   6  -1  422.56   12.80
   2   6  -1  422.96   13.50
   2   6  -1  409.16   12.80
  -1  -6   1    9.50    1.90
   1  -6  -1    6.10    2.60
   1  -6  -1    9.90    1.80
   1  -6  -1    6.90    2.10
  -1  -6   1    6.40    1.60
   1  -6  -1    5.80    2.20
   1  -6  -1    4.50    1.80
  -1  -6   1    8.30    2.50
  -1  -6   1    5.90    1.70
  -1  -6   1    9.90    2.00
  -1   6   1   10.70    1.10
  -1   6   1    9.40    0.90
   1   6  -1    7.40    1.80
   1   6  -1    7.90    2.40
  -1   6   1    8.80    2.40
   1   6  -1    8.60    1.90
   1   6  -1    5.90    1.80
  -1   6   1    8.20    0.80
  -1   6   1    9.20    1.80
  -1   6   1    9.80    1.20
  -1   6   1   10.90    2.00
   0  -6  -1   10.90    2.40
   0  -6   1   13.30    2.60
   0  -6  -1    8.60    2.10
   0  -6   1   10.50    1.80
   0  -6  -1   12.80    2.80
   0  -6   1   10.70    2.20
   0  -6   1    8.40    1.80
   0  -6   1   11.10    2.00
   0  -6  -1   10.20    2.10
   0  -6  -1   11.60    1.70
   0   6   1    8.60    1.10
   0   6  -1    8.50    2.20
   0   6  -1    9.10    1.80
   0   6   1    8.30    2.00
   0   6   1    9.70    1.10
   0   6  -1   10.90    2.00
   0   6  -1   13.20    2.70
   0   6   1    8.70    1.60
   0   6   1    8.00    2.40
  -1  -6  -1   42.70    1.90
   1  -6   1   46.10    3.00
   1  -6   1   40.30    3.40
  -1  -6  -1   46.20    2.80
  -1  -6  -1   40.40    3.30
  -1  -6  -1   39.30    3.30
  -1  -6  -1   45.90    4.30
   1  -6   1   41.50    3.90
   1  -6   1   46.20    3.30
  -1  -6  -1   40.30    3.40
   1  -6   1   39.10    3.00
  -1   6  -1   42.40    1.60
   1   6   1   42.30    2.00
   1   6   1   43.80    3.20
   1   6   1   44.30    1.50
  -1   6  -1   44.80    1.70
  -1   6  -1   43.80    3.20
  -1   6  -1   36.50    3.30
   1   6   1   44.60    1.80
   1   6   1   43.40    1.60
   1   6   1   41.70    3.90
   1   6   1   42.50    2.90
  -2  -6  -1   82.89    3.00
   2  -6   1   78.99    4.20
  -2  -6  -1   81.69    4.50
  -2  -6  -1   81.39    5.40
  -2  -6  -1   80.19    4.40
   2  -6   1   86.49    3.90
   2  -6   1   83.59    5.00
  -2  -6  -1   80.59    4.40
  -2  -6  -1   84.89    3.70
  -2  -6  -1   77.39    2.70
   2  -6   1   85.79    4.30
   2  -6   1   82.19    2.90
   2  -6   1   83.09    4.60
   2   6   1   86.79    2.70
  -2   6  -1   83.89    4.30
  -2   6  -1   83.79    2.80
   2   6   1   82.69    2.90
   2   6   1   84.89    5.20
   2   6   1   84.89    4.70
  -2   6  -1   80.59    2.90
   2   6   1   78.39    4.10
  -2   6  -1   85.79    3.90
  -2   6  -1   78.29    4.50
  -2   6  -1   83.39    2.60
   2   6   1   87.49    3.00
   3  -6   1  529.65   15.80
  -3  -6  -1  501.85   15.70
  -3  -6  -1  515.95   14.40
   3  -6   1  536.55   14.20
  -3  -6  -1  526.65   16.90
   3  -6   1  515.85   16.50
  -3  -6  -1  522.65   15.70
   3  -6   1  538.55   15.70
  -3  -6  -1  519.65   14.90
   3  -6   1  496.35   15.90
  -3  -6  -1  523.25   14.20
   3  -6   1  519.55   15.00
   3  -6   1  522.25   14.40
   3   6   1  508.75   16.60
   3   6   1  513.45   14.10
  -3   6  -1  521.75   14.20
  -3   6  -1  536.25   16.00
   3   6   1  513.25   15.90
  -3   6  -1  523.05   15.20
   3   6   1  527.55   14.30
  -3   6  -1  523.65   15.80
   3   6   1  512.25   15.30
   4  -6   1  349.47   10.30
  -4  -6  -1  347.27   12.80
   4  -6   1  348.97   11.70
   4  -6   1  352.26   10.60
   4  -6   1  342.97   12.30
  -4  -6  -1  361.26   10.70
  -4  -6  -1  360.56   10.20
   4  -6   1  356.26   10.30
   4  -6   1  325.27   11.70
  -4  -6  -1  339.17   11.60
   4  -6   1  363.36   11.60
  -4  -6  -1  362.16   10.30
   4   6   1  346.27   11.70
   4   6   1  362.56   12.70
  -4   6  -1  359.76   10.30
   4   6   1  354.86   10.90
  -4   6  -1  363.56   10.20
  -4   6  -1  379.26   11.80
  -4   6  -1  366.16   11.10
   4   6   1  348.37   10.10
   4   6   1  357.26   10.30
  -4   6  -1  342.67   11.80
   5  -6   1  217.28   10.10
  -5  -6  -1  226.68    7.20
   5  -6   1  224.98    7.30
  -5  -6  -1  226.78    7.20
   5  -6   1  209.88    9.20
   5  -6   1  236.98    7.30
  -5  -6  -1  227.58    7.50
   5  -6   1  227.28    8.40
  -5  -6  -1  206.88    9.80
   5  -6   1  237.48    7.30
   5   6   1  222.58    8.60
  -5   6  -1  230.38    7.30
   5   6   1  221.28    7.10
  -5   6  -1  221.38    7.10
  -5   6  -1  215.58    8.60
   5   6   1  212.98    7.00
  -5   6  -1  227.28    8.00
  -5   6  -1  223.38    8.50
   5   6   1  221.18    7.40
   5   6   1  226.68    9.60
  -6  -6  -1  335.77   10.10
  -6  -6  -1  322.87   10.10
  -6  -6  -1  318.37   10.20
   6  -6   1  332.37   11.30
   6  -6   1  327.07    9.80
   6  -6   1  322.87   10.10
   6  -6   1  316.87   10.10
  -6   6  -1  334.17   11.40
   6   6   1  332.57   10.00
  -6   6  -1  330.07   10.00
  -6   6  -1  330.37   10.90
  -6   6  -1  318.37   11.40
  -6   6  -1  338.97   10.20
   6   6   1  338.47   11.40
   6   6   1  305.97   10.00
   6   6   1  317.67   12.30
  -7  -6  -1   34.80    3.40
  -7  -6  -1   33.90    2.90
   7  -6   1   30.30    4.00
   7  -6   1   33.40    3.30
   7  -6   1   27.80    3.20
  -7  -6  -1   29.30    2.80
   7  -6   1   34.60    2.60
  -7   6  -1   35.30    3.00
  -7   6  -1   29.60    4.20
   7   6   1   33.10    2.60
  -7   6  -1   35.50    4.10
  -7   6  -1   32.90    3.00
   7   6   1   37.90    5.10
   7   6   1   35.00    4.00
  -7   6  -1   34.70    4.10
   8  -6   1   10.10    2.30
   8  -6   1    9.70    1.70
   8  -6   1    9.80    3.00
  -8  -6  -1   10.40    2.00
   8  -6   1    8.60    2.40
  -8  -6  -1    9.00    2.10
  -8  -6  -1    8.30    2.30
   8   6   1    8.40    2.90
   8   6   1   10.60    4.20
   8   6   1    9.50    1.70
  -8   6  -1   13.20    3.30
  -8   6  -1    9.40    3.00
  -8   6  -1    7.60    2.20
   9  -6   1   91.79    6.50
   9  -6   1   97.39    5.60
  -9  -6  -1  104.99    5.30
   9  -6   1  106.19    5.70
  -9  -6  -1   99.09    5.30
  -9   6  -1  101.59    5.40
   9   6   1   99.39    6.30
  -9   6  -1   96.09    5.50
  -9   6  -1   94.09    6.40
  -9   6  -1   99.99    6.80
  10  -6   1    7.70    2.90
 -10  -6  -1    8.20    2.40
  10  -6   1    4.10    3.10
  10  -6   1    9.20    1.70
 -10  -6  -1    8.00    2.50
  10  -6   1    6.20    3.40
 -10   6  -1    8.30    2.60
 -10   6  -1    8.30    3.50
  10   6   1    9.30    4.50
 -10   6  -1    9.30    2.80
  10   6   1   10.00    3.40
 -11  -6  -1   68.19    5.20
  11  -6   1   63.29    6.50
 -11  -6  -1   64.49    5.40
 -11   6  -1   71.69    6.50
 -11   6  -1   67.69    5.80
  11   6   1   62.79    5.90
  11   6   1   66.49    8.00
 -12  -6  -1    0.10    2.80
 -12  -6  -1   -2.20    2.90
  12  -6   1    3.90    3.90
  12   6   1    2.10    3.40
 -12   6  -1   -0.90    3.40
  12   6   1    4.70    5.30
 -12   6  -1    3.50    3.70
 -13  -6  -1   -0.20    3.20
  13  -6   1   13.10    4.90
 -13  -6  -1    1.60    3.30
 -13   6  -1    9.80    4.20
  13   6   1    9.90    6.20
 -13   6  -1    3.70    4.20
  13   6   1    4.40    3.80
  14  -6   1    8.30    5.30
 -14  -6  -1    0.40    3.70
 -14  -6  -1    2.40    3.50
 -14   6  -1    7.10    4.70
  14   6   1   15.40    7.00
 -14   6  -1    1.90    4.50
  14   6   1    6.00    4.40
  15  -6   1   -6.20    5.50
 -15  -6  -1   -6.80    4.10
  15   6   1   14.30    5.30
 -15   6  -1    6.10    5.60
  15   6   1   11.50    8.30
  14  -7  -1   -4.30    5.50
 -14  -7   1   -0.20    3.10
 -14  -7   1    5.70    3.50
  14   7  -1   -1.50    6.30
  14   7  -1   -1.80    4.20
 -14   7   1   -4.80    4.30
 -13  -7   1    7.00    3.20
 -13  -7   1    4.40    2.90
  13  -7  -1    0.80    4.60
 -13   7   1    1.70    4.20
 -13   7   1    3.50    3.90
  13   7  -1   -8.60    5.80
  13   7  -1    8.20    4.40
  12  -7  -1   28.00    5.60
 -12  -7   1   44.30    5.00
 -12  -7   1   38.20    4.80
  12   7  -1   42.30    6.80
 -12   7   1   25.40    4.60
 -12   7   1   36.30    4.80
  12   7  -1   36.20    5.30
 -11  -7   1   43.10    4.30
  11  -7  -1   37.40    5.70
 -11  -7   1   44.70    4.60
  11   7  -1   30.00    4.80
 -11   7   1   46.50    5.60
  11   7  -1   42.20    6.60
 -11   7   1   37.80    4.90
  10  -7  -1   -1.80    3.50
 -10  -7   1    1.60    2.10
 -10  -7   1    2.80    2.10
 -10   7   1   -2.70    3.20
 -10   7   1    0.50    3.00
  10   7  -1   -2.60    2.90
  10   7  -1   -0.50    4.00
 -10   7   1   -1.50    2.40
  -9  -7   1    4.70    1.90
   9  -7  -1    4.70    2.40
  -9  -7   1   -1.70    2.90
  -9  -7   1    0.30    1.80
   9  -7  -1   -0.50    2.40
   9  -7  -1    4.90    3.40
   9  -7  -1    7.60    2.80
  -9   7   1    0.20    2.90
  -9   7   1    1.90    2.00
   9   7  -1    3.10    3.00
  -9   7   1    1.50    2.80
  -9   7   1    1.70    2.20
   8  -7  -1    5.80    3.30
   8  -7  -1    1.50    2.20
  -8  -7   1    1.30    2.60
   8  -7  -1    2.20    2.30
  -8  -7   1    4.00    1.60
   8  -7  -1    0.20    2.00
  -8  -7   1    0.10    1.60
  -8   7   1    0.40    2.00
  -8   7   1    0.10    1.80
   8   7  -1   -0.10    1.50
   8   7  -1    3.30    3.80
  -8   7   1    5.00    2.80
  -8   7   1   -2.40    2.60
   7  -7  -1  162.88    8.20
  -7  -7   1  181.78    6.00
  -7  -7   1  178.98    7.30
  -7  -7   1  173.18    6.10
   7  -7  -1  170.78    6.80
   7  -7  -1  171.38    6.70
   7  -7  -1  174.68    6.70
  -7   7   1  173.58    6.40
  -7   7   1  171.18    8.10
  -7   7   1  181.98    8.00
  -7   7   1  169.88    7.80
   7   7  -1  172.28    6.20
   7   7  -1  164.78    7.90
  -7   7   1  172.98    6.70
   7   7  -1  164.68    8.80
  -6  -7   1    1.70    2.00
  -6  -7   1    2.70    1.20
   6  -7  -1    5.00    1.80
   6  -7  -1    1.60    2.10
   6  -7  -1   -1.50    2.50
  -6  -7   1    6.70    2.30
  -6  -7   1    1.30    1.10
   6  -7  -1    2.40    1.80
   6   7  -1    3.00    1.40
  -6   7   1    2.60    1.40
   6   7  -1    2.00    3.20
  -6   7   1    2.00    2.40
  -6   7   1    2.40    2.30
  -6   7   1    4.50    2.50
   6   7  -1    4.40    1.60
   6   7  -1    4.60    2.50
  -6   7   1    5.60    1.70
   5  -7  -1   60.29    3.70
  -5  -7   1   70.19    3.00
   5  -7  -1   67.59    5.30
  -5  -7   1   74.89    4.40
  -5  -7   1   65.99    4.30
   5  -7  -1   76.29    4.40
   5  -7  -1   71.09    3.60
  -5  -7   1   72.79    2.60
  -5   7   1   74.29    5.00
   5   7  -1   69.69    4.90
   5   7  -1   75.09    3.90
  -5   7   1   73.79    4.80
  -5   7   1   70.29    3.40
   5   7  -1   65.59    5.50
   5   7  -1   69.39    3.10
  -5   7   1   74.69    4.80
  -5   7   1   74.09    3.30
   5   7  -1   66.39    2.80
  -4  -7   1    2.00    0.80
  -4  -7   1    2.10    1.90
   4  -7  -1    0.30    2.30
   4  -7  -1    0.90    1.90
  -4  -7   1    1.00    1.90
   4  -7  -1    0.90    1.20
   4  -7  -1   -1.80    2.30
  -4  -7   1    1.40    3.00
   4  -7  -1    1.20    1.40
   4   7  -1    2.60    1.00
   4   7  -1    0.60    2.60
   4   7  -1   -0.40    1.60
   4   7  -1    4.50    2.20
  -4   7   1    2.90    1.50
  -4   7   1    0.60    2.00
  -4   7   1    1.90    1.90
  -4   7   1    2.30    1.40
  -3  -7   1  170.38    6.90
   3  -7  -1  164.48    6.60
  -3  -7   1  161.28    8.20
  -3  -7   1  159.28    6.40
   3  -7  -1  170.38    5.10
   3  -7  -1  167.98    7.40
  -3  -7   1  167.38    7.00
   3  -7  -1  173.18    5.60
   3  -7  -1  178.78    7.00
  -3   7   1  167.38    5.30
   3   7  -1  176.08    7.20
   3   7  -1  173.48    6.60
  -3   7   1  171.48    6.90
   3   7  -1  170.88    8.00
  -3   7   1  169.28    5.70
  -3   7   1  181.68    7.30
  -3   7   1  167.08    6.80
  -3   7   1  168.28    5.10
   2  -7  -1  114.19    5.40
   2  -7  -1  120.59    4.00
   2  -7  -1  120.89    6.00
  -2  -7   1  123.69    5.70
   2  -7  -1  108.39    6.10
   2  -7  -1  126.99    7.20
  -2  -7   1  117.59    5.80
  -2  -7   1  117.99    5.20
  -2  -7   1  120.49    6.70
  -2  -7   1  121.09    5.70
   2  -7  -1  126.89    5.60
  -2   7   1  121.49    4.00
  -2   7   1  125.49    4.20
  -2   7   1  118.29    3.70
   2   7  -1  116.89    5.70
  -2   7   1  124.29    5.90
  -2   7   1  123.79    5.40
  -2   7   1  124.69    3.60
   2   7  -1  123.89    6.50
   2   7  -1  124.49    5.50
   1  -7  -1   77.69    4.30
  -1  -7   1   83.19    4.60
   1  -7  -1   90.29    5.00
   1  -7  -1   84.19    4.60
  -1  -7   1   91.19    4.70
   1  -7  -1   80.59    5.20
  -1  -7   1   79.69    4.40
   1  -7  -1   76.19    5.50
  -1  -7   1   80.19    4.70
  -1  -7   1   76.79    5.80
   1   7  -1   80.09    5.40
  -1   7   1   82.19    2.90
  -1   7   1   97.89    5.80
  -1   7   1   84.19    4.80
   1   7  -1   90.29    4.80
   1   7  -1   86.29    4.80
  -1   7   1   86.89    3.00
  -1   7   1   88.49    4.50
   1   7  -1   85.49    4.70
   0  -7  -1    5.90    1.90
   0  -7   1   14.40    3.40
   0  -7   1   10.70    2.20
   0  -7  -1   12.00    3.40
   0  -7  -1    8.60    2.60
   0  -7  -1   11.30    2.50
   0  -7   1   11.80    2.30
   0  -7   1    8.70    2.00
   0  -7   1    9.60    2.70
   0  -7  -1   15.20    2.60
   0   7   1    9.60    1.20
   0   7  -1    6.10    2.60
   0   7  -1   12.30    2.40
   0   7   1   10.40    2.10
   0   7   1    8.60    2.20
   0   7  -1    9.90    2.40
  -1  -7  -1   88.69    5.10
   1  -7   1   81.19    5.80
  -1  -7  -1   83.19    5.00
   1  -7   1   83.79    4.70
  -1  -7  -1   90.79    6.10
  -1  -7  -1   86.69    4.30
   1  -7   1   84.19    4.50
   1  -7   1   87.69    4.70
   1  -7   1   85.69    5.20
  -1  -7  -1   83.39    4.90
   1   7   1   79.89    5.60
   1   7   1   82.89    4.60
  -1   7  -1   88.99    5.00
   1   7   1   88.29    2.90
  -1   7  -1   87.79    4.70
   1   7   1   85.59    3.10
   1   7   1   90.89    4.50
  -2  -7  -1   39.00    3.90
  -2  -7  -1   45.10    3.10
  -2  -7  -1   37.70    4.00
  -2  -7  -1   42.00    2.20
  -2  -7  -1   42.50    5.80
   2  -7   1   49.99    3.40
   2  -7   1   50.49    4.00
   2  -7   1   52.09    4.70
   2  -7   1   55.09    3.90
  -2   7  -1   52.49    3.90
   2   7   1   43.00    4.80
   2   7   1   40.50    3.50
  -2   7  -1   42.40    2.00
   2   7   1   41.90    2.30
  -2   7  -1   49.90    2.30
   2   7   1   40.30    2.00
   3  -7   1   12.80    2.80
  -3  -7  -1   11.80    1.90
  -3  -7  -1   11.10    2.70
  -3  -7  -1    8.50    2.30
  -3  -7  -1    7.80    1.30
   3   7   1    9.30    1.00
   3   7   1    9.20    3.30
   3   7   1    9.20    1.20
   3   7   1   10.30    2.80
   3   7   1    8.70    1.30
   3   7   1   10.10    2.20
  -4  -7  -1  201.88    7.10
   4  -7   1  204.48    7.20
   4  -7   1  171.88    7.30
   4  -7   1  216.68    8.30
  -4  -7  -1  198.18    6.50
   4  -7   1  210.78    6.40
  -4  -7  -1  197.28    6.30
   4   7   1  195.08    6.40
   4   7   1  211.98    6.50
  -4   7  -1  203.78    6.30
   4   7   1  200.88    8.30
  -4   7  -1  203.38    6.50
  -4   7  -1  217.68    8.30
   4   7   1  206.78    9.30
   4   7   1  207.18    7.50
  -4   7  -1  208.68    8.50
  -4   7  -1  208.38    7.60
   5  -7   1  201.88    8.40
   5  -7   1  214.18    7.30
  -5  -7  -1  208.18    6.90
   5  -7   1  209.18    6.90
   5  -7   1  212.98    7.10
  -5  -7  -1  200.88    7.30
  -5  -7  -1  218.18    6.80
  -5   7  -1  204.78    8.60
  -5   7  -1  210.98    8.40
   5   7   1  203.08    6.80
  -5   7  -1  209.08    6.70
  -5   7  -1  211.18    6.90
   5   7   1  206.18    8.60
   5   7   1  204.28    9.50
  -5   7  -1  206.48    7.80
   5   7   1  207.58    7.50
  -6  -7  -1   10.10    1.80
   6  -7   1   12.90    2.10
  -6  -7  -1   14.30    1.90
   6  -7   1    9.60    2.00
  -6  -7  -1   16.20    2.50
   6  -7   1   11.60    2.00
   6  -7   1    8.20    2.80
   6   7   1   14.30    4.00
  -6   7  -1   11.50    2.70
   6   7   1   11.20    3.00
  -6   7  -1   13.30    1.90
  -6   7  -1   10.00    3.20
  -6   7  -1   13.40    2.10
  -6   7  -1   10.00    2.70
   6   7   1   16.20    2.30
   7  -7   1   14.00    2.10
  -7  -7  -1   12.40    2.00
   7  -7   1   19.00    3.50
  -7  -7  -1   13.90    2.20
  -7  -7  -1    7.40    2.30
   7  -7   1   10.50    2.50
   7  -7   1    9.10    2.20
   7   7   1   11.30    2.20
   7   7   1   14.20    4.20
  -7   7  -1   16.20    3.10
  -7   7  -1   11.30    3.30
   7   7   1    7.30    2.90
  -7   7  -1   12.70    3.20
  -7   7  -1    9.10    2.10
  -8  -7  -1  147.09    6.60
   8  -7   1  154.38    5.70
  -8  -7  -1  153.88    6.30
   8  -7   1  159.88    8.00
   8  -7   1  154.18    6.70
   8  -7   1  155.98    6.80
  -8  -7  -1  158.98    6.50
  -8   7  -1  150.18    7.50
  -8   7  -1  152.28    6.60
   8   7   1  155.88    5.80
  -8   7  -1  158.48    8.00
   8   7   1  149.29    7.90
  -8   7  -1  150.88    6.40
   8   7   1  162.18    9.60
  -9  -7  -1    4.00    2.10
   9  -7   1   -1.30    3.20
   9  -7   1    1.10    2.50
  -9  -7  -1   -3.10    2.70
  -9  -7  -1    7.80    2.20
   9   7   1    5.00    1.70
   9   7   1    5.90    3.30
  -9   7  -1    2.10    3.00
   9   7   1    2.90    4.40
  -9   7  -1    3.80    2.40
  10  -7   1    7.00    3.90
 -10  -7  -1    6.30    2.50
 -10  -7  -1    8.20    2.60
 -10   7  -1   -0.10    2.70
  10   7   1    3.60    3.50
  10   7   1    3.80    4.50
 -10   7  -1    4.40    3.30
  11  -7   1   51.39    7.00
 -11  -7  -1   48.60    5.20
 -11  -7  -1   61.29    5.00
 -11   7  -1   56.29    5.80
  11   7   1   65.69    8.50
 -11   7  -1   59.09    6.70
  11   7   1   60.09    6.80
  12  -7   1   -7.00    4.20
 -12  -7  -1    9.30    3.30
 -12  -7  -1   -0.10    2.70
  12   7   1    4.80    4.10
  12   7   1    0.50    5.60
 -12   7  -1    4.40    3.90
 -12   7  -1   -3.20    3.60
  13  -7   1   61.49    7.00
 -13  -7  -1   61.19    6.30
 -13  -7  -1   69.79    6.50
  13   7   1   68.19    7.90
  13   7   1   57.59    9.20
 -13   7  -1   55.19    7.50
 -14  -7  -1    5.40    4.00
 -14  -7  -1    1.10    3.80
  14  -7   1   15.70    6.00
  14   7   1   12.10    8.00
  14   7   1    5.90    5.10
 -13  -8   1   11.60    3.40
  13  -8  -1    8.30    6.20
 -13  -8   1   13.30    3.60
 -13   8   1   12.90    5.00
  13   8  -1   10.30    4.90
  13   8  -1    4.20    6.50
 -12  -8   1    5.10    2.90
 -12  -8   1    0.50    3.10
  12  -8  -1    1.40    5.00
  12   8  -1   11.20    4.50
  12   8  -1    3.70    5.70
 -12   8   1    6.80    4.50
 -11  -8   1   -0.30    2.60
 -11  -8   1   -0.30    2.40
  11  -8  -1    5.30    4.50
  11   8  -1    8.60    5.70
  11   8  -1   -8.50    3.70
 -11   8   1    5.20    4.00
 -10  -8   1   37.70    5.10
  10  -8  -1   44.90    6.00
 -10  -8   1   36.80    4.20
  10   8  -1   38.80    5.50
  10   8  -1   43.10    6.60
 -10   8   1   42.10    5.30
 -10   8   1   47.40    6.00
 -10   8   1   45.80    5.00
   9  -8  -1  132.19    8.60
  -9  -8   1  121.59    5.70
  -9  -8   1  126.09    5.50
  -9   8   1  125.59    7.80
   9   8  -1  129.39    8.90
   9   8  -1  131.99    8.10
  -9   8   1  115.09    6.00
  -9   8   1  125.49    7.80
  -8  -8   1   95.49    4.40
   8  -8  -1   86.19    5.60
   8  -8  -1   92.19    7.40
  -8  -8   1   91.79    4.60
   8  -8  -1   99.59    5.60
   8   8  -1   84.59    4.50
   8   8  -1   89.99    7.50
  -8   8   1  103.69    6.70
   8   8  -1   95.29    6.80
  -8   8   1   91.69    5.00
  -8   8   1   90.79    6.90
  -7  -8   1   63.79    3.80
   7  -8  -1   70.39    6.40
  -7  -8   1   60.19    3.20
   7  -8  -1   54.09    4.60
   7  -8  -1   62.59    4.60
  -7  -8   1   60.29    4.90
   7  -8  -1   58.49    4.50
  -7   8   1   61.79    7.30
   7   8  -1   56.49    4.00
   7   8  -1   67.79    5.70
  -7   8   1   55.19    5.70
  -7   8   1   50.29    4.10
   7   8  -1   55.19    6.60
  -7   8   1   50.59    3.80
   6  -8  -1   10.20    2.90
   6  -8  -1    8.30    2.50
   6  -8  -1   10.40    2.20
  -6  -8   1    5.90    3.00
   6  -8  -1   12.20    3.60
  -6  -8   1    7.20    2.70
  -6  -8   1   10.30    1.50
  -6   8   1    9.20    2.10
  -6   8   1    8.30    3.10
   6   8  -1   17.30    4.50
  -6   8   1    9.10    1.70
   6   8  -1    9.10    1.80
   6   8  -1    6.70    4.20
   6   8  -1    9.30    2.40
  -6   8   1    2.90    4.90
  -5  -8   1   12.50    1.40
  -5  -8   1    9.90    2.90
   5  -8  -1   12.80    1.90
   5  -8  -1   10.00    2.60
   5  -8  -1   14.20    2.10
  -5  -8   1   11.80    2.70
   5  -8  -1   14.30    3.70
  -5   8   1   11.10    1.60
   5   8  -1    9.00    3.10
  -5   8   1    8.50    1.80
  -5   8   1    7.50    2.80
   5   8  -1   17.50    2.70
   5   8  -1   10.50    1.50
  -5   8   1    8.90    2.90
  -5   8   1   15.00    3.10
   5   8  -1   11.70    3.80
   4  -8  -1  202.08    6.90
  -4  -8   1  213.48    8.70
   4  -8  -1  198.68    8.10
  -4  -8   1  195.78    7.80
  -4  -8   1  203.58    8.30
   4  -8  -1  200.58    9.20
   4  -8  -1  208.18    6.20
   4   8  -1  217.08    9.90
   4   8  -1  206.38    6.10
   4   8  -1  221.48    8.00
  -4   8   1  208.58    8.40
  -4   8   1  206.88    8.30
  -4   8   1  196.68    6.90
   4   8  -1  210.68    8.90
  -4   8   1  207.08    6.30
  -4   8   1  211.68    8.90
  -3  -8   1   11.80    2.70
   3  -8  -1    9.10    2.60
   3  -8  -1    9.40    1.50
  -3  -8   1   11.60    2.50
  -3  -8   1    5.30    2.80
   3  -8  -1   13.90    3.40
   3   8  -1    9.80    2.70
  -3   8   1   10.60    1.30
   3   8  -1   16.30    3.80
  -3   8   1   10.80    1.00
  -3   8   1   11.30    2.70
  -3   8   1    9.60    1.70
   3   8  -1    8.60    2.60
  -2  -8   1   62.59    4.80
  -2  -8   1   55.19    4.30
   2  -8  -1   49.60    4.50
  -2  -8   1   59.19    4.70
   2  -8  -1   48.40    5.10
  -2   8   1   53.89    4.70
   2   8  -1   62.59    5.50
  -2   8   1   55.69    2.70
   2   8  -1   49.20    4.30
  -2   8   1   55.19    4.40
   2   8  -1   58.99    4.90
  -2   8   1   57.49    2.50
   1  -8  -1   48.80    4.90
   1  -8  -1   55.49    4.40
  -1  -8   1   55.59    4.50
  -1  -8   1   61.09    4.70
  -1   8   1   54.49    2.30
  -1   8   1   51.19    5.60
  -1   8   1   60.19    4.30
   1   8  -1   55.59    4.70
  -1   8   1   52.89    2.20
  -1   8   1   52.89    4.70
   1   8  -1   75.49    6.00
   1   8  -1   54.69    4.60
   0  -8   1  459.45   14.60
   0  -8  -1  461.95   15.10
   0  -8  -1  441.06   14.00
   0  -8   1  441.96   14.40
   0   8   1  459.65   14.30
   0   8  -1  456.95   15.80
   0   8   1  437.86   15.80
   0   8  -1  452.25   14.80
   0   8  -1  471.15   14.70
   0   8   1  454.85   14.70
  -1  -8  -1    0.80    2.60
   1  -8   1    1.30    2.10
  -1  -8  -1    1.10    2.00
   1  -8   1   -1.80    2.10
   1   8   1   -0.20    2.90
  -1   8  -1    7.00    2.40
   1   8   1   -1.00    1.00
  -1   8  -1    0.50    2.40
   1   8   1    1.40    2.10
   1   8   1    0.40    2.10
   2  -8   1  620.54   18.10
   2  -8   1  553.94   17.30
  -2  -8  -1  585.34   18.40
  -2  -8  -1  549.85   18.30
  -2  -8  -1  566.44   17.10
   2   8   1  572.44   17.70
  -2   8  -1  589.64   15.60
   2   8   1  565.54   19.10
  -2   8  -1  643.44   18.60
  -2   8  -1  601.84   18.00
   2   8   1  559.14   15.70
   2   8   1  565.64   15.60
  -2   8  -1  573.24   15.40
  -3  -8  -1  145.19    7.60
   3  -8   1  166.18    5.20
   3  -8   1  178.78    7.80
  -3  -8  -1  166.28    6.50
   3  -8   1  152.88    6.60
  -3  -8  -1  154.18    7.70
  -3  -8  -1  150.68    5.20
  -3   8  -1  180.78    7.60
  -3   8  -1  172.68    7.90
   3   8   1  162.58    8.70
  -3   8  -1  156.38    5.40
   3   8   1  166.48    7.10
   3   8   1  159.08    5.40
  -3   8  -1  164.68    5.20
   3   8   1  155.78    5.20
   4  -8   1  420.06   11.50
  -4  -8  -1  408.96   12.90
   4  -8   1  432.96   14.30
   4  -8   1  397.26   13.00
  -4  -8  -1  428.16   14.50
  -4  -8  -1  421.86   12.00
   4  -8   1  432.26   12.20
   4   8   1  419.06   12.00
   4   8   1  409.16   11.60
  -4   8  -1  439.06   14.20
  -4   8  -1  436.86   14.60
   4   8   1  410.56   15.40
  -4   8  -1  416.26   11.70
  -4   8  -1  414.96   13.40
   4   8   1  422.56   13.40
  -5  -8  -1    2.70    1.90
  -5  -8  -1    1.10    1.40
   5  -8   1    1.30    1.50
   5  -8   1   -1.30    2.70
   5  -8   1   -1.20    1.50
  -5  -8  -1    0.00    1.30
   5  -8   1    0.40    2.10
  -5  -8  -1    3.10    2.90
   5   8   1    3.10    1.60
  -5   8  -1   -1.20    1.50
  -5   8  -1    0.00    2.40
   5   8   1   -1.50    4.30
  -5   8  -1    1.40    1.30
   5   8   1   -0.10    3.40
   5   8   1   -0.70    2.00
  -5   8  -1   -0.50    2.40
   6  -8   1   36.30    3.80
   6  -8   1   54.29    5.50
   6  -8   1   41.50    3.40
  -6  -8  -1   52.39    4.10
   6  -8   1   35.10    4.80
  -6  -8  -1   45.80    3.60
  -6  -8  -1   45.00    3.20
  -6   8  -1   39.00    3.40
   6   8   1   48.00    4.00
  -6   8  -1   45.80    3.30
  -6   8  -1   40.30    5.30
   6   8   1   56.49    7.90
  -6   8  -1   47.70    5.60
   6   8   1   38.50    5.10
  -6   8  -1   42.50    4.50
   7  -8   1   54.79    4.00
   7  -8   1   65.09    6.00
  -7  -8  -1   48.60    3.70
  -7  -8  -1   58.59    3.80
   7  -8   1   53.59    4.20
   7  -8   1   60.79    4.20
  -7  -8  -1   56.69    4.50
   7   8   1   67.59    7.10
  -7   8  -1   54.39    5.90
  -7   8  -1   46.70    5.40
  -7   8  -1   56.79    5.20
  -7   8  -1   49.60    4.00
   7   8   1   48.80    5.90
   7   8   1   54.39    4.00
  -8  -8  -1   21.40    3.90
   8  -8   1   22.70    3.20
  -8  -8  -1   23.00    2.80
  -8  -8  -1   25.30    3.40
   8  -8   1   21.40    4.10
  -8   8  -1   16.80    3.70
   8   8   1   25.10    3.00
   8   8   1   14.00    3.80
   8   8   1   21.60    5.50
  -8   8  -1   21.60    3.00
  -9  -8  -1    0.90    2.10
   9  -8   1   -0.80    3.60
  -9  -8  -1   -2.10    2.80
  -9   8  -1    6.30    3.20
   9   8   1    0.60    1.90
   9   8   1    2.80    4.70
  -9   8  -1    1.50    3.40
   9   8   1    5.80    3.70
 -10  -8  -1   64.19    5.00
  10  -8   1   67.99    7.30
 -10  -8  -1   53.69    5.20
  10   8   1   58.09    8.10
 -10   8  -1   76.99    7.00
  10   8   1   62.89    7.30
 -11  -8  -1    4.90    2.90
 -11  -8  -1    5.30    3.30
  11   8   1    0.70    4.50
 -11   8  -1    4.40    4.20
  11   8   1   15.50    6.30
 -12  -8  -1   15.70    3.50
  12  -8   1    8.10    5.10
 -12  -8  -1    7.20    3.60
  12   8   1   26.10    7.30
  12   8   1    0.80    4.60
 -12   8  -1    3.40    4.60
 -13  -8  -1   11.90    3.90
 -13  -8  -1   14.60    4.20
  13  -8   1   15.20    6.00
  13   8   1   11.60    5.40
 -13   8  -1    4.70    5.50
  13   8   1   21.30    7.80
 -12  -9   1   13.80    3.40
 -12  -9   1    8.70    3.20
  12  -9  -1    2.30    6.00
 -12   9   1    8.90    4.90
  12   9  -1    5.10    4.60
  12   9  -1    4.00    6.80
 -11  -9   1   10.80    2.90
 -11  -9   1    8.30    2.90
  11  -9  -1    9.20    5.60
  11   9  -1    1.90    4.60
 -11   9   1    4.60    4.60
  11   9  -1    9.30    6.20
 -10  -9   1    7.40    2.50
  10  -9  -1    8.50    4.70
 -10   9   1   12.90    4.80
  10   9  -1   17.20    5.90
 -10   9   1   10.10    4.20
  10   9  -1    7.60    4.40
  -9  -9   1  114.99    5.50
   9  -9  -1   95.29   10.50
  -9  -9   1  113.29    5.00
   9   9  -1  115.09    9.40
   9   9  -1  100.49    7.90
  -9   9   1  115.29    8.00
  -9   9   1  118.79    8.50
   8  -9  -1   47.00    5.90
  -8  -9   1   44.40    3.50
  -8  -9   1   47.80    3.00
  -8   9   1   56.09    6.70
   8   9  -1   52.59    7.30
  -8   9   1   48.60    5.60
   8   9  -1   48.10    6.10
   7  -9  -1   48.40    4.60
   7  -9  -1   48.50    5.80
  -7  -9   1   52.79    3.40
   7   9  -1   54.79    4.50
  -7   9   1   53.89    6.20
   7   9  -1   49.40    6.00
   7   9  -1   52.29    6.70
  -7   9   1   53.79    5.80
  -6  -9   1   43.60    5.00
   6  -9  -1   40.80    3.30
  -6  -9   1   47.20    5.90
  -6  -9   1   45.20    2.60
   6  -9  -1   54.79    5.90
   6  -9  -1   39.90    3.80
  -6   9   1   47.10    5.60
   6   9  -1   52.39    6.60
  -6   9   1   41.40    5.40
   6   9  -1   43.50    4.30
   6   9  -1   46.20    5.70
   6   9  -1   46.40    4.60
   5  -9  -1   31.50    3.30
   5  -9  -1   38.30    5.00
  -5  -9   1   37.50    5.10
  -5   9   1   37.40    5.30
   5   9  -1   37.30    2.40
   5   9  -1   39.70    6.00
   5   9  -1   39.60    4.40
  -5   9   1   29.30    2.50
  -5   9   1   39.40    5.30
   5   9  -1   42.20    5.50
   4  -9  -1    9.80    1.70
  -4  -9   1    7.50    3.20
   4  -9  -1   10.00    3.80
   4   9  -1    8.30    4.20
  -4   9   1   10.50    3.00
  -4   9   1    5.20    3.00
  -4   9   1    7.30    1.60
   4   9  -1    7.00    3.10
   4   9  -1    4.70    2.60
  -4   9   1    8.20    2.10
  -4   9   1    9.30    1.10
  -3  -9   1  191.28    8.60
   3  -9  -1  183.88    9.10
  -3   9   1  195.38    8.80
   3   9  -1  180.38    7.90
  -3   9   1  186.98    5.80
  -3   9   1  195.68    8.20
   3   9  -1  158.98   11.70
  -3   9   1  180.48    6.10
   3   9  -1  187.48    9.60
   2  -9  -1  129.59    7.50
  -2  -9   1  140.59    7.30
  -2   9   1  131.99    4.30
   2   9  -1  128.89    8.10
   2   9  -1  123.09    6.70
  -2   9   1  129.49    4.20
  -2   9   1  141.29    8.50
  -2   9   1  144.19    6.80
   1  -9  -1   99.09    6.50
  -1  -9   1  104.39    6.40
  -1   9   1   90.09    5.80
   1   9  -1   94.29    6.20
   1   9  -1   99.59    6.10
   1   9  -1  123.79    7.60
  -1   9   1  101.39    6.20
   0  -9   1   70.39    5.40
   0  -9  -1   58.79    5.50
   0   9  -1   68.49    5.30
   0   9   1   64.09    5.30
   0   9   1   69.19    5.00
   0   9   1   52.79    6.20
   0   9  -1   86.19    5.80
   1  -9   1  143.69    7.20
  -1  -9  -1  122.29    6.40
  -1  -9  -1  143.49    7.40
  -1   9  -1  139.49    7.00
   1   9   1  121.19    9.00
   1   9   1  127.69    6.60
   1   9   1  137.69    6.90
  -2  -9  -1   44.40    4.60
   2  -9   1   59.89    5.70
  -2  -9  -1   59.69    5.60
  -2   9  -1   49.60    5.00
   2   9   1   54.99    4.80
  -3  -9  -1    6.50    3.10
   3  -9   1    8.10    3.40
  -3  -9  -1    8.00    2.60
   3   9   1    7.80    1.30
  -3   9  -1    6.30    1.30
   3   9   1    7.10    4.00
   3   9   1    5.00    2.80
   3   9   1    6.90    1.60
  -3   9  -1    6.30    2.90
  -3   9  -1    7.00    3.10
  -3   9  -1    5.50    1.50
   4  -9   1    6.10    3.50
  -4  -9  -1    3.60    3.60
  -4  -9  -1    5.20    1.40
  -4  -9  -1    5.60    2.40
   4  -9   1    7.10    1.60
   4   9   1    8.00    1.50
  -4   9  -1    7.40    3.20
  -4   9  -1    8.00    2.00
   4   9   1    5.70    2.60
  -4   9  -1   -1.10    2.80
   4   9   1    3.30    4.00
  -5  -9  -1    0.40    2.30
   5  -9   1   -2.20    3.20
  -5  -9  -1    4.50    3.30
   5  -9   1    1.50    1.80
   5  -9   1    3.20    2.80
  -5   9  -1    5.00    3.40
  -5   9  -1   -4.30    2.70
   5   9   1    1.30    4.20
  -5   9  -1    2.40    1.50
   5   9   1    2.60    2.50
   6  -9   1   59.49    6.20
  -6  -9  -1   62.39    3.70
   6  -9   1   59.29    4.20
  -6  -9  -1   63.29    6.30
  -6  -9  -1   67.09    6.40
   6  -9   1   68.29    6.30
   6   9   1   65.09    7.40
  -6   9  -1   64.79    6.50
   6   9   1   54.89    4.80
  -6   9  -1   60.89    6.30
   7  -9   1    8.50    2.50
  -7  -9  -1   12.60    2.30
  -7  -9  -1    8.30    2.10
   7  -9   1   10.80    4.20
   7   9   1    6.30    2.80
  -7   9  -1   10.20    3.90
   7   9   1   11.80    5.20
   7   9   1   16.70    4.60
  -8  -9  -1    2.00    2.20
  -8  -9  -1   -0.80    1.90
   8  -9   1    2.50    3.90
   8   9   1    6.50    2.60
   8   9   1   -1.70    3.80
  -8   9  -1   -0.60    3.70
   8   9   1    5.80    5.20
  -9  -9  -1   -3.40    2.10
  -9  -9  -1    1.70    2.50
   9  -9   1    1.20    4.30
   9   9   1    0.30    4.20
  -9   9  -1    0.00    4.00
   9   9   1   -6.50    5.20
 -10  -9  -1    6.40    2.70
 -10  -9  -1   12.80    3.10
  10  -9   1    1.70    8.00
  10   9   1   14.00    6.10
 -10   9  -1    0.70    4.00
  10   9   1   13.40    5.20
  11  -9   1   -2.00    4.90
 -11  -9  -1    1.60    2.90
 -11  -9  -1    3.40    3.30
  11   9   1   -2.30    6.20
  11   9   1    1.60    4.90
 -11   9  -1    7.10    4.70
  12   9   1   19.20    7.90
  11 -10  -1   13.60    6.30
 -11 -10   1    8.90    3.00
 -11  10   1    8.80    5.00
  11  10  -1   17.20    7.20
  11  10  -1    7.30    5.90
 -10 -10   1   -4.00    2.20
  10 -10  -1    3.70    5.50
  10  10  -1   -7.70    4.30
  10  10  -1   -5.70    5.90
 -10  10   1    0.40    4.90
 -10  10   1   -1.40    4.20
   9 -10  -1   -1.70    5.10
  -9 -10   1    4.20    2.10
   9  10  -1    9.80    5.00
   9  10  -1   -0.20    5.70
  -9  10   1   -0.10    4.70
  -9  10   1    2.90    4.40
   8 -10  -1    5.60    4.80
  -8 -10   1   -3.80    4.10
  -8 -10   1    3.30    1.90
   8  10  -1    3.20    5.40
  -8  10   1    7.40    4.20
  -8  10   1    2.30    4.10
   8  10  -1    3.90    4.60
   7 -10  -1   90.29    8.90
  -7 -10   1  114.39    8.30
  -7 -10   1  107.49    4.20
   7  10  -1  123.49    8.50
  -7  10   1  130.89    8.60
   7  10  -1  103.49    6.40
  -7  10   1  109.09    7.90
   7  10  -1  132.99   10.20
   6 -10  -1    8.80    2.40
   6 -10  -1    8.80    5.00
  -6 -10   1    1.60    3.70
   6  10  -1   14.30    4.50
   6  10  -1   10.90    3.40
   6  10  -1    2.10    4.80
  -6  10   1    4.80    3.70
  -6  10   1   10.60    3.90
  -5 -10   1   26.30    4.60
   5 -10  -1   17.10    2.20
   5 -10  -1    8.40    4.60
   5  10  -1   20.20    5.40
  -5  10   1   17.10    4.00
  -5  10   1   13.40    4.00
   5  10  -1   17.70    4.50
   5  10  -1   17.20    3.60
  -4 -10   1   50.39    7.10
   4 -10  -1   73.89    7.40
   4  10  -1   79.79    7.30
   4  10  -1   64.29    5.70
  -4  10   1   62.09    6.50
  -4  10   1   69.19    6.00
  -3 -10   1   18.20    4.20
   3 -10  -1   12.30    4.30
   3  10  -1   16.10    4.90
   3  10  -1   18.10    3.70
  -3  10   1   19.40    4.00
   2 -10  -1  155.18    9.00
  -2 -10   1  155.68    8.50
  -2  10   1  154.58    7.90
  -2  10   1  162.58    8.40
   2  10  -1  155.18    9.40
  -1 -10   1   27.40    4.10
   1 -10  -1   18.10    4.10
  -1  10   1   25.60    3.90
  -1  10   1   18.50    3.80
   1  10  -1   32.50    5.30
   1  10  -1   26.00    4.20
   1  10  -1   30.20    4.10
   0 -10  -1   14.20    3.80
   0 -10   1   12.80    3.70
   0  10   1   10.30    3.40
   0  10  -1   18.00    3.90
   0  10   1   13.60    4.50
   0  10  -1   12.70    3.50
   0  10   1   15.50    3.40
  -1 -10  -1   25.80    5.50
   1 -10   1   35.40    4.60
   1  10   1   24.20    5.30
  -1  10  -1   27.30    4.50
   1  10   1   33.20    4.40
  -2 -10  -1  151.98    8.70
   2 -10   1  163.58    8.50
  -2  10  -1  146.59    8.50
  -2  10  -1  147.39    8.10
   2  10   1  148.49    9.70
   3 -10   1  149.19    8.40
  -3 -10  -1  149.39    8.70
   3  10   1  135.79    7.30
  -3  10  -1  141.79    8.10
   3  10   1  136.29    9.20
  -3  10  -1  138.09    8.50
  -4 -10  -1   -6.50    3.40
   4 -10   1   -1.50    3.80
   4  10   1   -4.10    4.40
   4  10   1    0.70    2.80
  -4  10  -1    5.70    3.60
  -4  10  -1    4.10    4.00
  -5 -10  -1  156.98    5.30
   5 -10   1  163.78    6.00
  -5 -10  -1  168.78    9.70
   5 -10   1  179.48    9.30
   5  10   1  159.38   10.80
   5  10   1  158.58    7.80
  -5  10  -1  154.38    9.50
  -5  10  -1  164.88    9.10
   6 -10   1    1.10    3.80
  -6 -10  -1   -1.40    3.90
  -6 -10  -1    1.10    1.70
   6 -10   1    2.10    2.30
  -6  10  -1    2.70    3.60
   6  10   1    0.50    2.80
  -6  10  -1    3.30    4.00
   6  10   1   -1.60    4.90
  -7 -10  -1    3.10    2.00
  -7 -10  -1    2.40    4.20
   7 -10   1    1.90    4.30
  -7  10  -1    0.10    3.70
   7  10   1   14.10    5.50
   7  10   1    5.00    3.10
  -8 -10  -1    8.90    2.40
   8 -10   1    7.60    4.60
  -8 -10  -1    8.00    4.60
   8  10   1    9.10    5.90
  -8  10  -1   15.00    4.60
  -9 -10  -1    7.60    5.10
   9 -10   1    3.00    5.10
  -9 -10  -1   11.10    2.80
  -9  10  -1   10.20    4.90
   9  10   1   12.30    6.70
 -10 -10  -1    3.20    3.50
 -10 -10  -1   -0.30    2.60
 -10  10  -1   -0.40    4.90
  10  10   1    5.30    6.90
   9 -11  -1   -0.60    6.10
  -9 -11   1  -10.30    5.00
  -9 -11   1    1.90    2.10
   9  11  -1    6.50    6.80
  -9  11   1   -0.20    6.30
   9  11  -1    2.10    6.90
  -9  11   1    6.70    5.10
   8 -11  -1    8.60    6.20
  -8 -11   1   -0.70    5.20
  -8  11   1    4.60    4.90
   8  11  -1   13.10    6.60
  -8  11   1   10.30    5.80
   7 -11  -1   -0.50    5.20
  -7 -11   1    3.90    4.90
  -7  11   1   -9.40    3.90
   7  11  -1    6.30    5.50
  -7  11   1    2.30    4.20
  -6 -11   1   75.69    8.50
   6 -11  -1   84.99    9.20
   6  11  -1   63.29    6.90
  -6  11   1   62.99    8.00
   6  11  -1   70.89    8.80
  -6  11   1   70.79    7.60
   5 -11  -1   43.60    6.60
  -5 -11   1   56.29    7.90
   5  11  -1   56.39    7.60
  -5  11   1   43.10    6.20
   5  11  -1   45.40    6.10
  -5  11   1   46.30    5.90
  -4 -11   1    6.30    4.60
   4 -11  -1    2.70    4.80
  -4  11   1   10.90    4.00
   4  11  -1   12.50    5.50
   4  11  -1    8.30    4.10
  -4  11   1   11.40    4.10
  -3 -11   1  157.08    9.70
   3 -11  -1  145.49   10.10
   3  11  -1  160.38   10.80
  -3  11   1  153.88    9.00
  -3  11   1  168.48    9.50
   3  11  -1  154.18    8.80
   2 -11  -1    8.40    4.80
  -2 -11   1    5.80    4.00
   2  11  -1    8.50    5.20
   2  11  -1    4.80    3.80
  -2  11   1    2.80    3.70
  -2  11   1    4.00    3.60
  -1 -11   1    6.90    4.00
   1 -11  -1   12.60    4.70
  -1  11   1    7.40    3.70
  -1  11   1    5.20    3.80
   1  11  -1   10.90    4.10
   0 -11  -1   58.19    7.20
   0 -11   1   63.59    8.30
   0  11   1   54.29    6.50
   0  11  -1   74.69    7.20
   0  11  -1   58.49    6.80
  -1 -11  -1   16.60    4.70
   1 -11   1   25.30    5.10
  -1  11  -1   29.50    5.00
   1  11   1   20.00    5.50
  -1  11  -1   22.70    4.60
   1  11   1   23.90    4.60
   2 -11   1   30.80    5.50
  -2 -11  -1   31.20    5.50
  -2  11  -1   21.90    4.70
   2  11   1   31.40    6.70
  -2  11  -1   24.90    5.20
   2  11   1   36.20    5.10
  -3 -11  -1   31.60    5.90
   3 -11   1   28.90    5.40
  -3  11  -1   25.50    5.30
   3  11   1   21.70    4.30
  -3  11  -1   21.90    5.10
   3  11   1   31.60    6.30
   4 -11   1   28.50    5.30
  -4 -11  -1   42.30    6.40
   4  11   1   36.40    5.00
  -4  11  -1   35.40    5.90
  -4  11  -1   28.40    5.30
   4  11   1   56.89    8.30
   5 -11   1   -0.90    4.50
  -5 -11  -1    8.90    5.20
   5  11   1    5.70    5.00
   5  11   1    0.80    3.60
  -5  11  -1    6.30    4.50
  -5  11  -1   -5.20    4.30
   6 -11   1   -3.60    7.90
  -6 -11  -1    8.50    4.90
   6  11   1    7.80    5.80
   6  11   1    2.60    3.70
  -6  11  -1    8.40    4.50
   7 -11   1    2.80    5.40
  -7 -11  -1    1.00    1.90
  -7 -11  -1    6.50    5.20
  -7  11  -1   -6.30    4.10
   7  11   1    7.10    6.60
  -8 -11  -1   -9.80    5.10
  -8 -11  -1    0.60    2.40
   8  11   1    1.10    6.70
  -8  11  -1    7.20    4.90
   6 -12  -1   -1.30    6.20
  -6 -12   1    1.00    5.80
  -6  12   1    1.90    6.70
  -6  12   1    5.90    5.20
   6  12  -1   -2.30    6.10
  -5 -12   1   10.70    5.90
   5 -12  -1   13.20    6.30
   5  12  -1   11.10    6.80
  -5  12   1    8.20    5.30
  -5  12   1   11.70    5.30
   4 -12  -1  113.49   11.20
  -4 -12   1  140.09   10.50
   4  12  -1  122.89   10.90
  -4  12   1  123.09   10.00
  -4  12   1  136.89   10.00
   4  12  -1  134.39    9.50
  -3 -12   1   -3.90    4.90
   3 -12  -1   13.20    6.30
   3  12  -1    1.10    5.70
  -3  12   1    3.80    4.40
   3  12  -1    1.70    4.50
  -3  12   1    3.50    4.60
  -2 -12   1   15.60    5.20
   2 -12  -1   26.50    6.40
   2  12  -1   26.70    5.60
  -2  12   1   16.10    5.20
  -2  12   1   16.30    5.00
   1 -12  -1   41.10    7.00
  -1 -12   1   35.30    6.00
  -1  12   1   30.60    5.80
   1  12  -1   35.40    6.00
  -1  12   1   29.50    5.50
   0 -12   1   -6.50    4.70
   0 -12  -1    2.20    5.10
   0  12  -1    2.20    4.60
   0  12   1   -0.90    4.30
   1 -12   1   23.90    6.00
  -1 -12  -1   30.00    6.20
   1  12   1   23.40    5.20
  -1  12  -1   27.90    5.90
  -1  12  -1   26.20    5.70
  -2 -12  -1    5.50    5.10
   2 -12   1    8.10    5.50
   2  12   1    8.00    4.60
   2  12   1    5.00    5.90
  -2  12  -1    1.00    4.70
  -2  12  -1    5.70    5.00
  -3 -12  -1   13.80    5.50
   3 -12   1   -0.90    5.50
   3  12   1    1.80    4.40
  -3  12  -1    4.00    4.90
   3  12   1   -5.30    5.40
  -3  12  -1   -8.50    4.60
  -4 -12  -1    2.90    5.70
   4 -12   1   -1.50    5.60
   4  12   1    7.60    4.90
  -4  12  -1    2.80    5.10
   4  12   1   -7.70    5.60
  -5 -12  -1    8.10    6.20
   5  12   1   -4.20    5.80
   5  12   1    7.20    5.10
  -5  12  -1   -6.60    5.00
 -18   0   2   -3.50    4.40
 -18   0   2    8.60    5.30
 -17   0   2    2.50    4.30
  17   0  -2    1.00    3.30
 -17   0   2    1.80    4.30
  16   0  -2   25.90    4.00
 -16   0   2   13.60    4.40
 -16   0   2   27.00    4.70
 -15   0   2   -0.50    3.10
 -15   0   2   -0.80    3.20
  15   0  -2   -0.40    2.80
 -14   0   2   11.30    2.90
  14   0  -2    8.80    2.90
 -14   0   2   16.40    3.50
  13   0  -2   -1.00    2.20
  13   0  -2    0.30    1.70
 -13   0   2    1.20    2.50
 -13   0   2   -5.50    2.40
  12   0  -2   34.20    3.70
  12   0  -2   43.00    2.80
 -12   0   2   36.80    4.00
  12   0  -2   38.60    4.60
 -12   0   2   42.40    4.30
  11   0  -2    0.70    1.30
  11   0  -2    2.00    2.20
 -11   0   2   -3.60    1.70
  11   0  -2   -2.00    1.60
 -11   0   2    0.50    1.70
  11   0  -2    0.40    2.40
  10   0  -2    3.80    2.50
  10   0  -2    4.70    1.90
 -10   0   2    1.70    1.60
  10   0  -2    4.70    1.30
 -10   0   2    1.10    1.70
  10   0  -2    3.60    1.60
  10   0  -2   -0.90    1.70
 -10   0   2    2.90    2.30
   9   0  -2   -2.00    1.70
   9   0  -2   -0.40    1.00
  -9   0   2    1.20    1.40
  -9   0   2   -0.20    1.40
   9   0  -2   -3.80    1.30
   9   0  -2    0.00    1.30
  -9   0   2    1.60    2.00
   9   0  -2   -0.40    1.30
  -8   0   2  553.24   16.30
   8   0  -2  578.24   17.10
   8   0  -2  565.84   16.40
  -8   0   2  569.54   16.30
   8   0  -2  561.94   16.30
   8   0  -2  565.04   16.20
  -8   0   2  537.95   17.00
   8   0  -2  574.24   15.40
   7   0  -2    0.20    1.00
  -7   0   2    2.10    0.70
   7   0  -2    1.20    0.90
  -7   0   2    2.80    1.60
   7   0  -2   -0.30    1.10
  -7   0   2   -1.00    1.00
  -7   0   2   -1.60    1.00
   7   0  -2    3.90    1.30
   7   0  -2    1.80    1.30
  -6   0   2  282.37    7.80
   6   0  -2  276.47    8.60
   6   0  -2  280.27    8.50
   6   0  -2  285.07    9.10
  -6   0   2  278.87    9.10
   6   0  -2  285.67    7.90
   6   0  -2  277.97    8.60
  -6   0   2  277.77    8.50
  -6   0   2  269.87    8.50
   5   0  -2    0.30    1.10
   5   0  -2   -0.80    0.70
   5   0  -2   -0.30    0.80
  -5   0   2    0.30    0.50
   5   0  -2    1.90    1.10
  -5   0   2   -0.10    1.00
   5   0  -2    0.40    0.70
  -5   0   2    0.10    0.80
  -5   0   2   -0.40    0.80
  -4   0   2    9.90    1.20
  -4   0   2   11.70    0.90
  -4   0   2   12.20    1.30
   4   0  -2    7.60    0.90
   4   0  -2    9.60    1.20
   4   0  -2   13.20    1.60
  -4   0   2   12.20    1.50
   3   0  -2    0.10    0.50
  -3   0   2    0.70    0.60
  -3   0   2    1.30    0.60
  -3   0   2   -0.70    0.50
   3   0  -2    0.70    0.70
   3   0  -2    0.30    0.50
  -3   0   2    0.10    0.50
  -2   0   2 2324.67   60.49
  -1   0   2   -0.10    0.20
  -1   0   2   -0.20    0.30
   1   0  -2    0.20    0.30
  -1   0   2    0.30    0.30
   1   0  -2   -0.10    0.30
   1   0  -2    0.90    0.40
  -1   0   2   -0.60    0.30
   1   0  -2    0.60    0.40
   1   0  -2    0.20    0.40
   1   0  -2    0.00    0.20
  -1   0   2   -0.10    0.30
  -1   0  -2    0.50    0.40
  -1   0  -2    0.50    0.30
   1   0   2    0.50    0.40
  -1   0  -2    0.20    0.40
   1   0   2    0.30    0.30
   1   0   2    0.20    0.40
  -3   0  -2   16.50    1.50
  -3   0  -2   17.10    1.50
  -3   0  -2   10.90    1.00
  -3   0  -2   12.50    1.40
  -3   0  -2   11.40    1.40
   3   0   2   10.70    1.10
   3   0   2   15.90    1.40
  -5   0  -2   21.30    2.00
  -5   0  -2   14.40    1.50
  -5   0  -2   18.10    2.10
   5   0   2   17.60    1.90
  -5   0  -2   19.20    2.00
   5   0   2   14.80    1.40
  -6   0  -2 9999.00  259.17
  -7   0  -2    1.50    1.20
  -7   0  -2    1.00    1.70
   7   0   2   -0.20    1.10
  -7   0  -2    2.10    1.50
  -7   0  -2    0.70    1.30
   7   0   2    1.30    1.40
   7   0   2    0.10    1.50
   8   0   2  934.31   25.60
  -8   0  -2  926.41   26.50
  -8   0  -2  936.21   27.00
   8   0   2  974.80   26.50
  -8   0  -2  944.61   26.50
   8   0   2  959.10   26.50
   8   0   2  932.41   25.40
   9   0   2    1.40    1.80
  -9   0  -2    0.30    1.70
  -9   0  -2    1.70    1.90
   9   0   2    1.70    1.30
   9   0   2    0.90    1.40
   9   0   2   -0.20    1.90
  -9   0  -2    1.40    2.60
  10   0   2   49.20    3.20
 -10   0  -2   51.69    4.40
  10   0   2   44.00    3.00
 -10   0  -2   40.80    4.30
  10   0   2   48.10    4.30
 -10   0  -2   42.80    4.30
 -11   0  -2   -0.30    2.30
  11   0   2    1.70    1.60
  11   0   2    1.90    2.80
 -11   0  -2   -2.00    2.20
 -11   0  -2   -0.20    2.30
  11   0   2    3.90    1.80
 -12   0  -2   24.80    3.50
  12   0   2   24.30    2.90
  12   0   2   26.50    3.10
 -12   0  -2   26.30    3.70
 -13   0  -2   -2.30    2.70
 -13   0  -2   -2.70    2.80
  13   0   2    1.50    2.00
 -13   0  -2   -1.70    2.90
 -14   0  -2    6.80    3.30
 -14   0  -2    2.90    3.20
 -14   0  -2    3.60    3.50
  14   0   2   11.20    2.60
 -15   0  -2    2.50    4.10
 -15   0  -2   -2.30    3.60
 -15   0  -2   -4.10    3.90
 -16   0  -2   -7.60    4.20
 -16   0  -2    0.20    5.00
 -16   0  -2   -0.60    4.10
 -17  -1   2    3.50    4.00
 -17  -1   2    2.60    4.20
  17   1  -2   -2.60    3.30
 -17   1   2   -8.90    4.10
 -17   1   2    6.60    4.50
 -17   1   2    7.70    4.60
 -16  -1   2    0.70    3.60
  16  -1  -2    8.80    3.30
 -16  -1   2    7.80    3.90
  16   1  -2    9.10    3.40
 -16   1   2    6.80    4.00
  15  -1  -2   -3.00    2.70
 -15  -1   2    0.00    3.00
 -15  -1   2   -0.50    3.00
 -15   1   2    3.80    3.40
  15   1  -2   -1.30    2.90
 -15   1   2   -3.00    2.70
 -14  -1   2   -0.90    2.70
  14  -1  -2    3.60    2.50
 -14  -1   2   -3.20    2.50
  14   1  -2   -3.30    2.50
 -14   1   2    1.40    2.70
 -14   1   2    5.20    2.90
  13  -1  -2    9.40    2.40
  13  -1  -2    9.70    2.30
 -13  -1   2    5.50    3.00
  13  -1  -2   10.60    3.90
 -13  -1   2    5.70    2.40
  13  -1  -2    7.70    3.30
 -13   1   2    7.00    2.70
  13   1  -2    6.00    2.60
 -13   1   2    4.00    2.40
  12  -1  -2  112.29    7.10
  12  -1  -2  106.49    6.20
 -12  -1   2  115.89    6.00
  12  -1  -2  113.69    5.00
 -12  -1   2  117.89    6.10
  12  -1  -2  116.39    5.50
 -12   1   2  119.79    6.20
 -12   1   2  105.19    6.10
  12   1  -2  115.69    5.80
  11  -1  -2   35.10    4.60
  11  -1  -2   33.00    3.20
  11  -1  -2   31.50    3.00
 -11  -1   2   34.80    3.70
 -11  -1   2   29.70    3.40
  11  -1  -2   29.90    4.00
  11  -1  -2   35.30    4.40
  11   1  -2   29.30    3.80
 -11   1   2   33.40    3.80
 -11   1   2   28.00    3.70
  11   1  -2   39.00    3.50
 -10  -1   2  196.98    8.80
  10  -1  -2  221.78    7.20
  10  -1  -2  222.08    8.90
  10  -1  -2  224.88    8.10
  10  -1  -2  217.48    7.50
  10  -1  -2  233.48    8.20
 -10  -1   2  208.08    7.90
 -10  -1   2  223.08    8.00
  10   1  -2  210.28    7.70
  10   1  -2  221.78    8.00
 -10   1   2  209.38    8.90
  10   1  -2  199.68    7.80
 -10   1   2  211.18    8.00
 -10   1   2  214.58    8.00
  -9  -1   2    2.50    1.40
   9  -1  -2    3.50    1.80
  -9  -1   2    1.80    1.20
   9  -1  -2    2.60    2.30
   9  -1  -2    5.00    1.40
   9  -1  -2    1.20    1.50
  -9  -1   2    1.40    2.20
   9  -1  -2    4.60    1.60
  -9   1   2    4.10    1.60
   9   1  -2    3.20    1.40
  -9   1   2    0.90    1.50
   9   1  -2    3.00    1.50
   9   1  -2    3.90    1.60
  -9   1   2    7.20    2.30
   8  -1  -2    0.80    1.40
  -8  -1   2    1.40    1.20
  -8  -1   2    2.30    1.80
  -8  -1   2    2.40    1.20
   8  -1  -2    1.50    1.30
   8  -1  -2    0.00    1.70
   8  -1  -2    1.20    1.30
   8  -1  -2    2.00    1.40
   8   1  -2    2.00    1.30
   8   1  -2    1.00    1.20
  -8   1   2    2.50    1.20
  -8   1   2    0.20    1.20
  -8   1   2    3.30    1.70
  -8   1   2   -0.50    0.90
   8   1  -2    1.10    1.00
  -7  -1   2  431.76   12.60
  -7  -1   2  428.86   12.60
   7  -1  -2  412.76   13.30
   7  -1  -2  430.26   12.70
  -7  -1   2  428.46   13.40
   7  -1  -2  431.46   12.20
   7  -1  -2  437.46   13.40
   7   1  -2  417.26   12.60
  -7   1   2  433.96   12.10
   7   1  -2  437.46   13.30
  -7   1   2  441.86   13.40
   7   1  -2  426.06   12.60
  -7   1   2  427.56   12.70
   7   1  -2  434.06   12.70
  -7   1   2  444.56   12.70
   6  -1  -2   84.09    3.60
  -6  -1   2   87.39    4.00
   6  -1  -2   87.09    3.30
  -6  -1   2   84.79    3.50
  -6  -1   2   83.49    3.40
   6  -1  -2   83.59    3.60
   6  -1  -2   87.59    4.10
   6   1  -2   83.19    3.50
  -6   1   2   84.59    3.50
   6   1  -2   84.29    3.50
   6   1  -2   80.39    3.60
  -6   1   2   79.89    3.50
  -6   1   2   86.99    4.10
  -6   1   2   81.79    3.20
   6   1  -2   84.49    4.00
  -5  -1   2  737.33   20.70
  -5  -1   2  754.62   21.20
   5  -1  -2  783.42   20.60
   5  -1  -2  761.12   20.80
  -5  -1   2  764.62   20.70
   5  -1  -2  788.22   21.40
   5  -1  -2  771.72   20.80
   5   1  -2  760.72   21.20
  -5   1   2  786.62   20.80
  -5   1   2  755.32   20.50
  -5   1   2  789.92   21.40
   5   1  -2  763.32   20.90
   5   1  -2  769.62   20.70
   5   1  -2  759.72   20.70
  -5   1   2  705.23   21.20
  -4  -1   2  133.39    4.60
   4  -1  -2  111.49    5.10
   4  -1  -2  127.19    4.30
   4  -1  -2  131.59    4.30
  -4  -1   2  120.29    4.40
   4  -1  -2  131.99    4.30
  -4  -1   2  128.99    4.20
  -4   1   2  129.99    4.30
   4   1  -2  133.89    4.20
   4   1  -2  130.59    4.60
  -4   1   2  129.89    4.20
  -4   1   2  127.29    4.30
   4   1  -2  129.59    4.20
   4   1  -2  135.89    4.50
  -4   1   2  127.59    4.70
   2  -1  -2 1065.59   28.50
  -2  -1   2 1057.29   28.30
  -2  -1   2 1047.30   28.30
  -2  -1   2 1094.89   28.50
   2  -1  -2 1079.79   28.50
   2  -1  -2 1063.89   28.70
  -2  -1   2 1076.49   28.40
   2  -1  -2 1102.79   28.60
  -2   1   2 1077.99   28.60
  -2   1   2 1075.09   28.70
  -2   1   2 1063.89   28.50
  -2   1   2 1058.89   28.50
   2   1  -2 1056.59   28.30
   2   1  -2 1177.38   28.50
   2   1  -2 1081.39   28.40
   2   1  -2 1080.59   28.40
   2   1  -2 1147.99   28.60
  -2   1   2 1086.59   28.50
   1  -1  -2 1782.42   46.60
   1  -1  -2 1767.92   46.50
   1  -1  -2 1776.32   46.50
  -1  -1   2 1793.12   46.30
  -1  -1   2 1811.52   46.60
   1  -1  -2 1749.22   46.60
  -1   1   2 1831.82   46.50
  -1   1   2 1778.32   46.60
   1   1  -2 1813.62   46.50
  -1   1   2 1757.92   46.50
   0  -1   2  748.13   19.80
   0  -1  -2  756.12   19.80
   0  -1  -2  750.02   20.00
   0  -1  -2  738.83   19.90
   0  -1   2  746.63   19.60
   0  -1   2  747.03   19.60
   0  -1  -2  743.83   19.80
   0   1   2  745.33   19.80
   0   1  -2  752.42   19.80
   0   1  -2  770.62   19.70
   0   1   2  745.23   19.70
   0   1   2  746.93   19.80
   0   1  -2  754.52   19.60
   0   1   2  723.63   19.90
   4  -1   2   88.79    3.50
  -4  -1  -2   88.19    3.30
  -4  -1  -2   89.29    3.50
   4  -1   2   94.29    3.60
  -4  -1  -2   89.29    3.50
   4  -1   2   87.79    2.60
   4  -1   2   96.39    3.60
  -4   1  -2   91.89    3.50
   4   1   2   86.59    3.30
  -4   1  -2   84.39    3.50
   4   1   2   89.39    3.50
  -4   1  -2   89.49    3.60
   4   1   2   89.29    3.50
  -5  -1  -2  529.15   14.90
   5  -1   2  512.75   14.80
   5  -1   2  523.65   14.70
  -5  -1  -2  535.75   14.60
   5  -1   2  513.95   14.80
  -5  -1  -2  514.85   14.90
   5  -1   2  513.35   13.90
   5   1   2  540.45   14.90
  -5   1  -2  530.75   14.90
  -5   1  -2  525.25   14.90
   5   1   2  517.15   14.80
  -5   1  -2  518.65   14.90
  -5   1  -2  525.95   15.10
  -6  -1  -2   17.70    2.20
   6  -1   2   20.50    1.30
  -6  -1  -2   16.10    1.90
   6  -1   2   20.20    2.20
  -6  -1  -2   20.60    2.60
   6  -1   2   16.60    2.20
   6  -1   2   23.60    2.10
  -6  -1  -2   19.50    2.20
  -6   1  -2   16.40    2.20
   6   1   2   14.50    1.80
  -6   1  -2   16.30    2.20
   6   1   2   17.70    2.20
  -6   1  -2   19.10    2.30
   6   1   2   19.40    2.00
  -7  -1  -2  409.86   12.20
  -7  -1  -2  421.36   12.70
  -7  -1  -2  422.46   12.70
   7  -1   2  413.86   12.20
   7  -1   2  412.86   11.50
  -7  -1  -2  418.86   13.30
   7  -1   2  423.66   12.70
   7  -1   2  408.26   12.60
  -7   1  -2  418.16   12.70
   7   1   2  409.06   12.10
   7   1   2  416.86   12.70
  -7   1  -2  424.96   12.80
  -7   1  -2  421.56   13.10
  -7   1  -2  410.16   12.70
   7   1   2  431.16   12.70
   8  -1   2  198.78    7.40
  -8  -1  -2  205.18    7.50
  -8  -1  -2  197.88    8.20
   8  -1   2  206.88    7.50
   8  -1   2  203.68    6.20
   8  -1   2  204.48    6.90
  -8  -1  -2  209.58    7.50
  -8  -1  -2  194.88    6.90
  -8   1  -2  210.58    7.60
   8   1   2  194.48    6.70
  -8   1  -2  200.18    7.50
  -8   1  -2  199.68    7.90
  -8   1  -2  203.88    7.40
   8   1   2  201.38    7.40
   8   1   2  202.38    7.40
  -9  -1  -2  433.46   14.70
  -9  -1  -2  446.76   13.40
   9  -1   2  441.96   13.10
   9  -1   2  437.66   13.80
  -9  -1  -2  435.76   13.80
  -9  -1  -2  449.46   14.00
   9  -1   2  452.05   13.90
   9   1   2  431.06   14.70
   9   1   2  442.26   12.60
  -9   1  -2  441.86   14.00
  -9   1  -2  446.26   13.90
   9   1   2  446.36   13.90
  -9   1  -2  434.76   13.90
  -9   1  -2  439.46   14.50
   9   1   2  451.15   13.10
  10  -1   2   42.80    2.60
  10  -1   2   46.30    4.30
  10  -1   2   45.70    3.30
 -10  -1  -2   39.40    4.20
 -10  -1  -2   37.60    3.60
 -10   1  -2   39.00    4.10
  10   1   2   35.60    4.10
 -10   1  -2   42.60    4.10
 -10   1  -2   43.70    5.20
  10   1   2   40.00    3.20
  10   1   2   39.40    2.80
 -10   1  -2   43.90    4.20
  11  -1   2    0.00    2.30
  11  -1   2    6.20    2.30
  11  -1   2    2.80    1.60
 -11  -1  -2    6.60    2.70
 -11  -1  -2    2.40    2.30
 -11   1  -2    3.10    2.40
  11   1   2    3.30    2.00
 -11   1  -2    3.20    2.50
 -11   1  -2    5.00    2.60
  11   1   2    7.30    1.80
  12  -1   2   40.50    5.30
 -12  -1  -2   35.90    4.70
  12  -1   2   40.90    3.00
 -12  -1  -2   38.20    4.60
  12  -1   2   47.10    4.10
 -12   1  -2   43.60    4.70
 -12   1  -2   38.00    4.90
  12   1   2   44.40    3.80
 -12   1  -2   36.20    4.80
  12   1   2   44.00    3.20
  13  -1   2   18.60    2.40
 -13  -1  -2    9.60    3.30
 -13  -1  -2   15.00    3.60
 -13  -1  -2   10.10    3.30
 -13   1  -2   17.40    3.70
 -13   1  -2   19.30    3.60
  13   1   2   15.50    3.00
 -13   1  -2   11.60    3.30
 -14  -1  -2   19.60    4.00
 -14  -1  -2   27.20    4.60
 -14  -1  -2   18.80    3.90
  14   1   2   22.10    3.50
 -14   1  -2   19.50    4.20
 -14   1  -2   25.10    4.40
 -14   1  -2   17.50    4.00
 -15  -1  -2    3.70    3.90
 -15  -1  -2    0.00    3.50
 -15  -1  -2   -4.30    4.00
 -15   1  -2    1.90    4.00
 -15   1  -2   -1.60    3.90
  15   1   2    0.10    3.00
 -16  -1  -2   -0.90    4.60
 -16  -1  -2    9.60    4.60
 -16  -1  -2    9.30    4.40
 -16   1  -2   -6.50    4.30
 -16   1  -2    1.20    4.60
 -16   1  -2   -2.00    4.50
 -17  -2   2   -2.90    3.70
 -17  -2   2   -0.80    3.80
  17   2  -2   -1.90    3.60
 -17   2   2   -2.30    4.30
 -17   2   2   -2.40    4.30
 -17   2   2    1.60    4.60
  16  -2  -2   36.30    4.90
 -16  -2   2   31.10    4.90
 -16  -2   2   34.80    4.80
  16   2  -2   26.60    4.40
 -16   2   2   36.50    5.40
 -16   2   2   20.60    4.80
 -16   2   2   29.10    4.90
  15  -2  -2    2.10    2.60
 -15  -2   2   -4.30    2.70
 -15  -2   2   -2.90    3.10
  15  -2  -2   -2.20    4.00
  15   2  -2    0.20    2.90
 -15   2   2    3.70    3.80
 -15   2   2    3.90    3.50
 -15   2   2   -3.40    3.40
 -14  -2   2   17.00    3.50
 -14  -2   2   14.20    3.00
  14  -2  -2   14.30    4.20
  14  -2  -2   12.80    2.80
  14   2  -2    9.50    3.00
 -14   2   2   12.80    3.20
 -14   2   2   12.40    3.20
  13  -2  -2    7.70    4.40
  13  -2  -2    5.80    2.30
 -13  -2   2    4.80    2.50
  13  -2  -2    5.80    3.20
  13  -2  -2    1.70    2.60
 -13  -2   2    8.70    2.60
  13   2  -2   11.20    2.70
 -13   2   2    7.70    2.90
 -13   2   2    6.70    2.70
  12  -2  -2  133.89    6.00
 -12  -2   2  143.29    6.60
  12  -2  -2  126.49    5.90
  12  -2  -2  124.29    6.90
  12  -2  -2  136.59    7.70
 -12  -2   2  127.79    6.40
 -12   2   2  126.49    6.60
 -12   2   2  136.19    6.70
  12   2  -2  132.19    6.30
  11  -2  -2  274.17    9.20
  11  -2  -2  262.67    9.90
 -11  -2   2  265.17    9.70
  11  -2  -2  281.17   11.00
  11  -2  -2  269.47    9.20
 -11  -2   2  268.57    9.70
  11  -2  -2  278.27    9.90
  11   2  -2  264.37    9.60
 -11   2   2  281.67   10.00
 -11   2   2  271.37    9.80
  10  -2  -2  180.38    6.60
  10  -2  -2  180.78    6.70
  10  -2  -2  173.08    7.10
 -10  -2   2  181.28    7.00
 -10  -2   2  180.18    7.00
  10  -2  -2  177.28    7.10
  10  -2  -2  169.78    8.00
  10   2  -2  184.48    7.00
 -10   2   2  177.78    7.10
 -10   2   2  183.08    7.10
 -10   2   2  173.68    8.00
  10   2  -2  170.68    6.90
 -10   2   2  183.28    6.50
   9  -2  -2   18.50    2.40
   9  -2  -2   17.00    3.00
  -9  -2   2   11.20    2.50
  -9  -2   2   14.70    2.00
  -9  -2   2   13.50    2.00
   9  -2  -2   11.90    2.00
   9  -2  -2   16.40    2.20
  -9   2   2   13.20    2.90
   9   2  -2   15.70    2.10
   9   2  -2   12.50    2.00
  -9   2   2   14.30    2.20
   9   2  -2   15.70    2.20
  -9   2   2    9.10    1.90
  -9   2   2   12.70    1.90
  -8  -2   2   59.99    3.20
   8  -2  -2   63.89    4.20
   8  -2  -2   60.19    3.20
   8  -2  -2   62.59    3.50
  -8  -2   2   61.99    3.30
  -8  -2   2   58.69    3.70
  -8  -2   2   60.69    4.20
  -8   2   2   56.29    3.30
   8   2  -2   59.49    3.20
  -8   2   2   55.09    3.00
  -8   2   2   56.89    4.10
  -8   2   2   58.99    3.40
   8   2  -2   55.49    3.40
   8   2  -2   62.59    3.30
  -7  -2   2   70.39    3.40
   7  -2  -2   76.99    3.60
  -7  -2   2   78.19    3.90
   7  -2  -2   74.19    3.40
   7  -2  -2   72.09    4.20
  -7  -2   2   72.69    3.40
   7  -2  -2   76.79    3.60
  -7  -2   2   75.99    4.30
  -7   2   2   67.49    4.10
   7   2  -2   65.59    3.30
  -7   2   2   77.39    3.60
   7   2  -2   65.59    3.50
  -7   2   2   86.49    3.40
  -7   2   2   79.49    3.60
   7   2  -2   70.59    3.40
  -6  -2   2  190.18    6.90
   6  -2  -2  190.48    6.30
   6  -2  -2  216.38    7.20
   6  -2  -2  191.68    6.40
  -6  -2   2  185.88    6.10
  -6  -2   2  184.88    6.10
  -6  -2   2  189.88    6.60
   6  -2  -2  205.18    6.50
  -6   2   2  182.38    6.30
   6   2  -2  192.18    6.20
  -6   2   2  189.68    6.30
  -6   2   2  182.88    6.20
   6   2  -2  174.98    6.40
  -6   2   2  188.38    6.90
   6   2  -2  186.08    6.20
  -5  -2   2  414.96   12.10
  -5  -2   2  415.06   11.60
  -5  -2   2  406.36   11.60
   5  -2  -2  414.76   11.80
   5  -2  -2  414.16   11.80
  -5  -2   2  428.36   12.30
   5  -2  -2  369.16   12.30
   5  -2  -2  418.16   12.40
   5   2  -2  412.36   12.00
  -5   2   2  406.76   12.30
  -5   2   2  397.06   11.70
   5   2  -2  416.26   11.60
   5   2  -2  423.06   11.60
  -5   2   2  409.96   11.80
  -5   2   2  403.36   11.70
   4  -2  -2  180.68    5.70
   4  -2  -2  167.58    5.50
  -4  -2   2  177.78    4.80
  -4  -2   2  164.58    6.30
   4  -2  -2  172.88    5.50
  -4  -2   2  175.48    5.30
  -4  -2   2  168.48    5.70
   4  -2  -2  178.88    6.10
  -4  -2   2  176.38    5.20
  -4   2   2  171.28    5.40
  -4   2   2  149.88    6.40
   4   2  -2  176.28    6.00
  -4   2   2  173.48    5.40
   4   2  -2  174.38    5.30
   3  -2  -2  140.69    4.80
  -3  -2   2  139.89    4.20
  -3  -2   2  121.29    4.30
  -3  -2   2  145.49    4.70
   3  -2  -2  133.09    4.40
   3  -2  -2  138.19    4.40
  -3  -2   2  138.59    4.60
  -3  -2   2  143.39    4.10
   3  -2  -2  141.49    5.00
  -3   2   2  136.69    4.70
   3   2  -2  138.59    4.20
  -3   2   2  143.89    4.90
  -3   2   2  136.89    4.40
   3   2  -2  147.69    4.80
  -3   2   2  139.79    4.40
   3   2  -2  139.49    4.20
   2  -2  -2  593.14   16.80
   2  -2  -2  617.64   16.90
  -2  -2   2  708.93   16.10
   2  -2  -2  599.54   16.40
  -2  -2   2  611.84   16.10
   2  -2  -2  605.74   16.70
  -2  -2   2  610.74   16.70
  -2  -2   2  592.54   16.50
  -2  -2   2  610.04   16.10
   2  -2  -2  603.44   16.40
  -2   2   2  604.04   16.40
   2   2  -2  600.94   16.10
   2   2  -2  624.94   16.10
   2   2  -2  580.64   16.50
  -2   2   2  597.04   16.40
  -2   2   2  575.94   16.70
  -2   2   2  602.64   16.70
  -2   2   2  614.24   16.40
   0  -2  -2 1673.53   43.00
   0  -2  -2 1610.54   42.40
   0  -2   2 1657.63   42.60
   0  -2   2 1655.63   42.40
   0  -2   2 1619.64   42.60
   0  -2  -2 1617.34   42.70
   0  -2  -2 1603.14   42.40
   0  -2   2 1601.04   42.60
   0   2  -2 1619.44   42.30
   0   2  -2 1599.14   42.60
   0   2   2 1601.34   42.30
   0   2   2 1624.04   42.90
   0   2   2 1653.33   42.80
   0   2   2 1621.14   42.40
   0   2   2 1616.74   42.40
  -1  -2  -2  442.96   12.20
  -1  -2  -2  436.76   12.90
   1  -2   2  442.56   12.00
  -1  -2  -2  473.05   12.50
   1  -2   2  451.05   12.00
   1  -2   2  452.45   12.00
  -1  -2  -2  439.66   11.80
  -1  -2  -2  442.16   12.20
   1  -2   2  449.95   12.00
   1  -2   2  464.85   12.50
   1  -2   2  462.05   12.50
   1   2   2  434.76   12.80
   1   2   2  457.05   12.20
   1   2   2  450.95   12.50
  -1   2  -2  456.55   12.50
  -1   2  -2  439.76   11.90
   1   2   2  449.36   12.20
  -1   2  -2  439.86   11.90
  -1   2  -2  443.26   12.10
   2  -2   2   15.80    1.50
  -2  -2  -2   16.30    2.20
   2  -2   2   17.70    1.30
   2  -2   2   15.20    1.20
   2  -2   2   15.50    0.80
   2  -2   2   17.80    1.60
  -2  -2  -2   14.30    1.40
  -2  -2  -2   15.60    1.40
   2  -2   2   18.30    1.20
   2   2   2   14.90    1.20
   2   2   2   15.30    1.50
   2   2   2   15.00    1.20
  -2   2  -2   14.50    1.20
  -2   2  -2   15.20    1.20
  -2   2  -2   12.20    1.60
   2   2   2   15.00    2.10
   3  -2   2   27.70    1.70
   3  -2   2   24.10    1.60
  -3  -2  -2   22.20    1.60
   3  -2   2   26.40    2.00
  -3  -2  -2   23.10    1.60
   3  -2   2   22.30    1.80
   3  -2   2   24.50    1.70
  -3   2  -2   24.00    1.90
  -3   2  -2   25.70    1.70
   3   2   2   22.70    1.80
   3   2   2   25.90    1.60
  -3   2  -2   24.80    1.70
   3   2   2   28.00    1.70
  -3   2  -2   23.50    1.60
   3   2   2   25.10    2.60
  -4  -2  -2  322.07    9.50
   4  -2   2  314.77    9.40
   4  -2   2  329.47    9.50
  -4  -2  -2  325.97    9.50
   4  -2   2  317.77    9.60
  -4  -2  -2  321.47    9.50
   4  -2   2  324.77    9.60
   4   2   2  318.27    9.50
   4   2   2  317.07   10.50
   4   2   2  324.57    9.50
   4   2   2  315.27    9.50
  -4   2  -2  327.57    9.80
  -4   2  -2  329.67    9.60
  -4   2  -2  320.77    9.50
  -4   2  -2  333.67    9.50
  -5  -2  -2   14.50    1.80
  -5  -2  -2   16.00    1.70
   5  -2   2   16.20    2.10
   5  -2   2   15.80    2.00
   5  -2   2   13.60    1.90
  -5  -2  -2   15.20    1.80
   5  -2   2   15.70    1.80
  -5   2  -2   13.80    1.60
  -5   2  -2   17.10    2.10
   5   2   2   13.80    1.70
  -5   2  -2   15.20    1.80
  -5   2  -2   18.00    2.00
   5   2   2   14.00    1.60
   5   2   2   11.90    1.40
  -6  -2  -2  215.78    7.00
  -6  -2  -2  218.88    7.10
   6  -2   2  216.18    7.10
   6  -2   2  211.68    7.00
   6  -2   2  203.38    7.20
   6  -2   2  207.68    5.80
   6  -2   2  213.38    7.10
  -6  -2  -2  200.18    7.00
   6   2   2  210.48    6.90
  -6   2  -2  213.08    7.10
  -6   2  -2  204.08    7.30
   6   2   2  207.98    7.00
  -6   2  -2  209.78    7.10
  -6   2  -2  204.78    7.30
   6   2   2  206.48    7.00
   7  -2   2    2.00    1.50
  -7  -2  -2    0.40    1.30
  -7  -2  -2    1.00    1.30
   7  -2   2    0.90    1.30
   7  -2   2    1.00    0.60
  -7  -2  -2   -1.30    1.10
  -7  -2  -2    0.30    1.50
   7  -2   2    1.70    1.30
   7  -2   2    0.00    1.40
  -7   2  -2   -1.40    1.50
  -7   2  -2    0.00    1.40
  -7   2  -2    0.00    1.60
   7   2   2    1.50    1.40
  -7   2  -2    0.40    1.40
   7   2   2    2.20    1.20
   7   2   2   -0.60    1.20
  -8  -2  -2   36.20    4.00
  -8  -2  -2   45.00    3.20
   8  -2   2   45.80    3.60
   8  -2   2   40.40    3.30
  -8  -2  -2   39.90    3.30
  -8  -2  -2   43.00    3.30
   8  -2   2   36.90    3.00
   8  -2   2   41.80    3.30
   8  -2   2   42.50    1.90
  -8   2  -2   39.60    3.20
  -8   2  -2   50.69    3.60
   8   2   2   41.30    2.90
  -8   2  -2   41.80    3.30
   8   2   2   42.90    3.30
   8   2   2   41.80    3.30
   9  -2   2    7.20    2.00
   9  -2   2    6.60    1.10
   9  -2   2    5.90    1.90
  -9  -2  -2    6.90    2.10
  -9  -2  -2    2.00    1.90
  -9  -2  -2    7.00    2.20
   9  -2   2    6.20    2.20
  -9   2  -2    5.40    2.20
   9   2   2    2.90    2.00
  -9   2  -2    5.80    2.00
   9   2   2    4.90    1.80
  -9   2  -2    6.40    2.20
  -9   2  -2    7.70    2.60
 -10  -2  -2   17.20    2.90
  10  -2   2   13.30    1.50
  10  -2   2   10.70    2.50
  10  -2   2   13.60    2.80
 -10  -2  -2   14.50    2.70
  10  -2   2   11.50    2.70
 -10  -2  -2   10.50    2.50
  10   2   2   15.60    1.80
 -10   2  -2   11.60    2.70
 -10   2  -2    7.40    3.00
 -10   2  -2   15.20    2.60
 -10   2  -2    9.70    2.70
  10   2   2   14.50    2.50
 -11  -2  -2  123.79    6.40
  11  -2   2  131.49    4.80
 -11  -2  -2  134.29    6.70
  11  -2   2  125.99    6.80
  11  -2   2  126.59    6.20
 -11  -2  -2  131.99    6.70
 -11   2  -2  141.89    7.00
  11   2   2  133.99    6.10
  11   2   2  135.89    4.90
 -11   2  -2  146.79    7.00
 -11   2  -2  134.29    6.80
  12  -2   2   30.10    4.00
  12  -2   2   29.90    4.40
 -12  -2  -2   24.40    3.60
 -12  -2  -2   24.70    3.40
 -12   2  -2   27.30    4.10
 -12   2  -2   28.10    3.80
  12   2   2   31.30    4.00
 -12   2  -2   25.70    4.80
  13  -2   2    0.80    1.60
  13  -2   2   -2.90    6.00
 -13  -2  -2    0.80    2.90
 -13  -2  -2    6.30    2.90
 -13   2  -2    0.20    3.10
  13   2   2    5.30    2.80
 -13   2  -2    8.40    3.50
 -13   2  -2   -0.10    2.80
 -14  -2  -2    3.50    3.40
 -14  -2  -2   -3.60    3.00
 -14   2  -2   -1.90    3.50
 -14   2  -2    2.00    3.60
 -14   2  -2   -2.10    3.60
  14   2   2    4.80    3.00
 -15  -2  -2   -7.30    3.60
 -15  -2  -2   -0.10    4.10
 -15  -2  -2   -0.20    3.90
  15   2   2    2.40    3.20
 -15   2  -2    5.80    4.40
 -15   2  -2   -3.10    3.90
 -15   2  -2    0.10    4.10
 -16  -2  -2   16.30    5.30
 -16  -2  -2   12.00    4.60
 -16  -2  -2   18.70    5.10
 -16   2  -2   13.70    5.10
 -16   2  -2   19.40    5.40
 -17  -3   2    8.90    4.30
 -17  -3   2   10.10    4.30
  17   3  -2   10.50    4.50
  17   3  -2   12.20    7.90
 -17   3   2   -2.10    4.70
 -17   3   2    4.80    5.00
  16  -3  -2    9.60    5.40
 -16  -3   2    9.80    3.80
 -16  -3   2   11.20    3.80
 -16   3   2    1.80    4.30
 -16   3   2   12.00    4.30
  16   3  -2    8.00    3.80
 -16   3   2   11.10    4.40
 -15  -3   2    6.00    3.20
  15  -3  -2   20.30    5.20
 -15  -3   2   12.70    3.70
  15  -3  -2   10.80    2.80
 -15   3   2   12.50    3.70
 -15   3   2    7.40    3.90
 -15   3   2    6.40    3.90
  15   3  -2   12.50    3.50
 -14  -3   2    8.90    3.00
 -14  -3   2    3.30    2.80
  14  -3  -2    9.00    4.20
  14  -3  -2    7.40    2.50
 -14   3   2   10.30    3.60
 -14   3   2    8.70    3.40
  14   3  -2    7.40    3.40
 -14   3   2    6.90    3.40
 -13  -3   2  198.08    8.30
  13  -3  -2  182.58    8.20
  13  -3  -2  196.28    7.60
 -13  -3   2  197.78    8.50
  13  -3  -2  202.48    9.30
 -13   3   2  196.28    8.60
  13   3  -2  193.48    8.40
 -13   3   2  194.18    8.80
 -13   3   2  199.58    9.30
  12  -3  -2  525.25   16.70
 -12  -3   2  535.85   17.40
 -12  -3   2  544.85   17.00
  12  -3  -2  538.55   16.20
  12  -3  -2  553.24   18.40
  12  -3  -2  543.15   17.30
  12   3  -2  546.35   17.00
 -12   3   2  547.45   17.20
 -12   3   2  554.94   17.30
 -12   3   2  528.05   17.80
 -11  -3   2   26.80    3.50
  11  -3  -2   32.90    4.40
  11  -3  -2   21.50    3.10
  11  -3  -2   29.60    3.40
  11  -3  -2   20.20    3.20
  11  -3  -2   29.60    3.80
 -11  -3   2   25.40    3.40
 -11   3   2   29.40    3.60
 -11   3   2   23.50    3.50
 -11   3   2   31.30    3.70
  11   3  -2   31.90    3.60
  10  -3  -2   60.59    5.20
 -10  -3   2   49.60    4.50
 -10  -3   2   55.99    3.90
  10  -3  -2   55.59    4.40
  10  -3  -2   50.79    4.20
 -10  -3   2   60.79    3.80
  10  -3  -2   60.79    4.10
 -10   3   2   57.89    3.80
 -10   3   2   60.09    4.20
 -10   3   2   54.99    5.20
  10   3  -2   59.69    4.20
 -10   3   2   59.79    4.10
  -9  -3   2  159.18    6.10
  -9  -3   2  150.28    6.70
   9  -3  -2  164.48    6.40
   9  -3  -2  153.58    6.20
  -9  -3   2  159.18    6.10
  -9  -3   2  151.48    7.40
   9  -3  -2  153.18    7.20
  -9   3   2  146.09    6.80
  -9   3   2  162.18    6.10
   9   3  -2  150.48    6.00
   9   3  -2  160.48    6.50
   9   3  -2  149.39    6.00
  -9   3   2  168.38    6.40
  -9   3   2  159.18    7.30
  -8  -3   2  320.17   11.20
   8  -3  -2  328.17   10.30
  -8  -3   2  330.47   10.10
   8  -3  -2  310.37   10.20
   8  -3  -2  316.67   11.10
  -8  -3   2  329.77   10.10
   8  -3  -2  326.27   10.30
  -8  -3   2  322.57   10.80
   8   3  -2  320.57   10.40
  -8   3   2  325.07   10.20
  -8   3   2  319.17   10.20
   8   3  -2  312.37   10.00
  -8   3   2  327.47   10.30
   8   3  -2  321.67   11.50
   8   3  -2  304.07   10.00
  -8   3   2  324.87   11.10
   7  -3  -2  507.25   14.80
  -7  -3   2  517.65   15.60
   7  -3  -2  525.35   15.70
  -7  -3   2  500.55   14.40
   7  -3  -2  522.65   14.80
   7  -3  -2  504.15   14.90
  -7  -3   2  487.75   15.10
  -7  -3   2  492.35   14.50
   7   3  -2  487.45   14.40
   7   3  -2  507.05   15.80
  -7   3   2  507.35   14.80
  -7   3   2  494.05   15.50
  -7   3   2  516.15   14.70
   7   3  -2  493.85   14.40
   7   3  -2  490.45   14.90
  -7   3   2  509.65   14.70
  -6  -3   2    4.50    1.00
   6  -3  -2    4.70    1.80
  -6  -3   2    5.50    1.60
  -6  -3   2    5.50    1.50
   6  -3  -2    5.40    1.60
  -6  -3   2    3.50    0.90
  -6   3   2    5.00    1.80
  -6   3   2    5.00    1.60
   6   3  -2    3.90    1.10
   6   3  -2    4.80    1.00
   6   3  -2    8.80    2.20
   6   3  -2    6.30    1.60
   5  -3  -2  830.72   21.90
   5  -3  -2  794.92   21.80
   5  -3  -2  796.62   22.20
   5  -3  -2  871.51   22.80
  -5  -3   2  787.62   21.00
  -5  -3   2  782.32   22.30
  -5  -3   2  777.02   21.50
  -5  -3   2  836.72   22.30
  -5  -3   2  783.62   21.50
   5   3  -2  768.62   22.10
  -5   3   2  784.72   21.80
  -5   3   2  791.22   21.70
   5   3  -2  777.62   22.50
  -5   3   2  790.52   22.10
   5   3  -2  792.32   21.50
   5   3  -2  787.52   21.50
  -5   3   2  814.42   22.50
  -5   3   2  781.22   22.20
   4  -3  -2  107.49    4.40
  -4  -3   2  109.39    3.50
   4  -3  -2  105.69    3.90
   4  -3  -2  112.59    4.60
  -4  -3   2  110.29    4.30
   4  -3  -2  100.49    3.90
  -4  -3   2  108.99    3.50
  -4  -3   2  106.29    3.50
  -4   3   2   94.29    3.70
   4   3  -2  106.49    3.50
  -4   3   2  106.89    4.40
   4   3  -2  106.89    4.20
  -4   3   2  102.29    4.20
  -4   3   2  107.99    3.80
   4   3  -2  112.79    4.60
  -4   3   2  110.49    4.20
   4   3  -2  103.29    3.60
  -3  -3   2 1244.88   30.70
  -3  -3   2 1068.89   29.70
  -3  -3   2 1176.18   30.00
  -3  -3   2 1313.47   30.90
   3  -3  -2 1036.90   30.10
   3  -3  -2 1064.49   30.10
  -3  -3   2 1088.79   29.70
   3  -3  -2 1098.49   31.00
   3  -3  -2 1064.79   30.60
  -3  -3   2 1259.77   30.80
   3  -3  -2 1070.69   30.80
   3   3  -2 1314.17   31.60
  -3   3   2 1065.19   30.50
   3   3  -2 1149.98   30.50
   3   3  -2 1117.49   30.00
  -3   3   2 1061.99   30.30
   3   3  -2 1194.68   29.80
   3   3  -2 1214.58   29.80
  -3   3   2 1046.50   30.00
  -3   3   2 1065.29   30.60
  -2  -3   2  442.56   11.70
  -2  -3   2  491.35   12.40
   2  -3  -2  422.86   12.20
   2  -3  -2  426.26   13.00
   2  -3  -2  416.16   12.80
   2  -3  -2  428.46   12.80
  -2  -3   2  505.25   13.20
   2  -3  -2  419.06   12.20
   2   3  -2  470.85   12.60
  -2   3   2  425.26   12.20
   2   3  -2  521.55   11.80
  -2   3   2  420.36   12.30
  -2   3   2  414.06   12.70
  -2   3   2  409.96   13.00
  -2   3   2  426.36   12.20
  -2   3   2  415.46   12.20
   2   3  -2  478.15   12.40
  -1  -3   2 2305.37   59.39
   1  -3  -2 2297.37   59.19
   1  -3  -2 2256.67   59.09
  -1  -3   2 2268.37   59.39
  -1  -3   2 2494.25   59.69
   1  -3  -2 2252.07   59.69
   1  -3  -2 2242.48   59.09
   1  -3  -2 2184.08   60.09
  -1  -3   2 2122.79   59.89
   1  -3  -2 2255.17   58.99
   1  -3  -2 2220.08   59.09
  -1   3   2 2285.07   59.09
  -1   3   2 2218.48   58.99
   1   3  -2 2263.07   59.39
   1   3  -2 2214.28   59.29
   1   3  -2 2458.75   59.69
  -1   3   2 2260.87   59.69
  -1   3   2 2252.07   59.09
   1   3  -2 2395.46   59.69
  -1   3   2 2202.18   59.89
  -1   3   2 2235.38   59.09
   0  -3   2 1292.27   33.80
   0  -3  -2 1360.86   34.60
   0  -3   2 1224.98   34.70
   0  -3  -2 1296.67   33.80
   0  -3   2 1322.17   34.00
   0  -3  -2 1278.67   33.80
   0  -3   2 1287.47   33.40
   0  -3  -2 1281.37   34.40
   0  -3  -2 1323.17   33.70
   0  -3  -2 1329.67   34.50
   0  -3   2 1315.87   33.30
   0  -3   2 1309.67   33.40
   0  -3   2 1318.87   34.40
   0   3   2 1293.97   33.80
   0   3   2 1298.47   33.80
   0   3  -2 1312.47   34.00
   0   3   2 1263.37   33.80
   0   3   2 1168.48   33.90
   0   3   2 1221.68   34.90
   0   3  -2 1308.47   34.30
   0   3  -2 1285.57   34.30
   0   3   2 1285.27   33.70
   0   3  -2 1277.17   33.40
   0   3   2 1256.27   34.70
   1  -3   2   95.99    3.20
   1  -3   2   94.09    3.70
  -1  -3  -2   91.09    3.20
  -1  -3  -2   95.89    3.70
   1  -3   2   98.09    2.90
  -1  -3  -2   95.49    4.30
   1  -3   2   96.59    3.20
   1  -3   2   92.99    3.60
   1  -3   2   97.39    3.00
  -1  -3  -2   92.29    3.70
   1  -3   2   95.19    3.90
  -1  -3  -2   98.79    3.00
  -1   3  -2   87.99    3.60
  -1   3  -2   94.69    2.90
   1   3   2   94.29    3.20
  -1   3  -2   95.49    3.10
  -1   3  -2   99.59    3.20
   1   3   2   83.79    4.10
   1   3   2   84.69    4.00
  -1   3  -2   97.29    3.80
   1   3   2   94.69    3.10
   1   3   2   97.19    3.10
  -2  -3  -2   71.79    2.80
  -2  -3  -2   76.09    3.90
   2  -3   2   73.79    2.70
   2  -3   2   74.19    2.60
  -2  -3  -2   74.39    3.20
   2  -3   2   76.09    2.90
   2  -3   2   75.29    2.70
   2  -3   2   80.09    3.40
  -2  -3  -2   74.89    2.90
   2  -3   2   72.39    3.30
  -2  -3  -2   78.89    2.60
   2   3   2   91.09    3.50
   2   3   2   75.39    2.80
   2   3   2   74.79    3.30
  -2   3  -2   76.99    2.70
  -2   3  -2   76.39    3.30
  -2   3  -2   77.79    2.70
  -2   3  -2   74.69    2.80
   2   3   2   88.09    2.90
   2   3   2   69.39    3.70
  -3  -3  -2  166.68    5.40
  -3  -3  -2  171.98    5.80
  -3  -3  -2  170.58    5.40
   3  -3   2  167.68    5.80
   3  -3   2  170.78    5.30
   3  -3   2  171.38    5.90
   3  -3   2  172.88    5.50
  -3  -3  -2  173.38    6.60
   3  -3   2  165.08    5.30
   3  -3   2  166.98    4.90
  -3   3  -2  166.48    5.90
   3   3   2  171.28    5.60
   3   3   2  171.88    5.90
   3   3   2  170.68    5.40
  -3   3  -2  171.98    5.30
  -3   3  -2  175.78    5.50
   3   3   2  164.98    6.50
   3   3   2  171.58    5.40
   4  -3   2   90.29    4.10
  -4  -3  -2   96.09    3.90
   4  -3   2   91.09    2.80
  -4  -3  -2   94.89    3.60
   4  -3   2   90.69    3.60
   4  -3   2   91.49    4.00
   4  -3   2   91.69    3.90
   4  -3   2   92.29    3.50
  -4  -3  -2   93.59    3.60
  -4   3  -2   93.99    3.50
   4   3   2   92.89    3.50
   4   3   2   89.49    3.60
  -4   3  -2   86.49    4.00
  -4   3  -2   93.29    3.80
   4   3   2   94.79    4.00
   4   3   2   88.59    4.70
   4   3   2   90.99    3.60
  -4   3  -2   90.49    3.50
  -5  -3  -2  137.29    5.00
   5  -3   2  131.49    5.20
   5  -3   2  136.49    4.90
  -5  -3  -2  140.89    5.00
   5  -3   2  133.99    5.10
  -5  -3  -2  141.89    5.30
   5  -3   2  135.29    4.90
   5   3   2  134.19    4.90
   5   3   2  138.69    4.80
   5   3   2  132.59    5.20
   5   3   2  133.29    4.90
   5   3   2  137.49    6.30
  -5   3  -2  137.99    5.20
  -5   3  -2  137.39    4.90
  -5   3  -2  127.59    5.30
  -5   3  -2  130.49    5.30
  -6  -3  -2  240.08    8.00
   6  -3   2  227.28    7.70
  -6  -3  -2  238.28    7.80
  -6  -3  -2  240.28    7.80
   6  -3   2  232.68    7.90
   6  -3   2  240.68    7.80
   6  -3   2  237.88    8.00
   6   3   2  230.68    7.70
  -6   3  -2  236.88    7.70
  -6   3  -2  232.38    8.20
   6   3   2  229.28    9.30
  -6   3  -2  249.18    7.80
  -6   3  -2  230.18    8.00
   6   3   2  223.78    7.60
   6   3   2  234.48    7.90
   7  -3   2   12.00    2.10
  -7  -3  -2   11.30    2.00
   7  -3   2    9.80    1.80
   7  -3   2   10.90    2.10
   7  -3   2    7.50    1.70
  -7  -3  -2    6.60    1.70
  -7  -3  -2   10.00    1.90
  -7   3  -2    8.20    1.80
   7   3   2    9.10    1.90
  -7   3  -2   12.40    2.30
  -7   3  -2   11.40    2.10
   7   3   2   10.80    1.80
  -7   3  -2    9.50    1.80
   7   3   2    6.60    3.00
   7   3   2   14.40    2.00
   8  -3   2  278.17    9.20
   8  -3   2  271.87    9.10
  -8  -3  -2  242.68   10.30
   8  -3   2  256.27    9.00
  -8  -3  -2  263.97    9.10
  -8  -3  -2  268.97    9.20
  -8  -3  -2  270.57    9.10
   8  -3   2  257.27    9.40
   8   3   2  270.07   10.90
  -8   3  -2  262.27    9.10
  -8   3  -2  265.67    9.60
  -8   3  -2  262.67    9.00
   8   3   2  252.27    8.90
  -8   3  -2  270.17    9.50
   8   3   2  275.77    9.10
   9  -3   2   -0.70    2.00
   9  -3   2   -0.90    2.10
  -9  -3  -2    2.00    1.90
  -9  -3  -2   -0.80    1.50
   9  -3   2   -1.60    2.00
  -9  -3  -2   -1.70    1.60
   9  -3   2   -0.70    1.80
  -9   3  -2    0.30    2.00
  -9   3  -2    2.80    1.80
   9   3   2   -0.60    3.40
   9   3   2    0.90    1.90
  -9   3  -2    0.90    2.40
  -9   3  -2   -1.00    1.80
  10  -3   2  110.19    5.90
  10  -3   2  127.59    6.60
 -10  -3  -2  113.59    6.10
  10  -3   2  120.49    6.10
 -10  -3  -2  122.79    5.90
 -10  -3  -2  123.99    6.10
  10  -3   2  100.59    5.80
  10   3   2  119.59    5.80
 -10   3  -2  116.29    6.00
  10   3   2  121.39    8.30
 -10   3  -2  131.89    6.70
 -10   3  -2  118.29    6.00
 -10   3  -2  118.19    6.80
 -11  -3  -2    7.60    2.60
 -11  -3  -2   10.90    2.70
  11  -3   2    8.70    2.80
 -11   3  -2   10.60    3.10
  11   3   2   12.80    1.80
 -11   3  -2    9.30    2.90
  11   3   2   11.80    2.80
  11   3   2   13.90    1.90
  11   3   2    7.20    4.50
 -11   3  -2    9.40    2.70
 -12  -3  -2    7.00    2.80
  12  -3   2    8.00    3.70
 -12  -3  -2    7.80    2.90
  12   3   2   14.00    3.00
  12   3   2   13.70    5.40
 -12   3  -2   11.50    3.30
 -12   3  -2    4.70    3.00
 -12   3  -2   15.10    3.40
 -13  -3  -2    1.10    2.70
 -13  -3  -2   -0.70    2.90
  13   3   2   -7.00    4.90
  13   3   2    0.30    2.80
 -13   3  -2    2.00    3.40
 -13   3  -2   -2.90    3.00
 -13   3  -2   -3.00    3.00
 -14  -3  -2   30.40    4.70
 -14  -3  -2   26.60    4.40
 -14   3  -2   35.50    5.10
  14   3   2   35.90    7.50
 -14   3  -2   23.60    4.90
  14   3   2   35.90    4.60
 -14   3  -2   32.80    5.10
 -15  -3  -2    8.00    4.20
 -15  -3  -2    4.30    3.90
  15   3   2   20.30    7.50
 -15   3  -2   13.10    4.30
 -15   3  -2    0.80    4.60
  15   3   2    1.50    3.70
 -16  -3  -2   -7.00    4.10
 -16  -3  -2   -9.00    4.20
 -16  -3  -2    1.90    4.60
 -16   3  -2    0.40    4.70
  16   3   2   12.50    8.40
 -16   3  -2    4.00    5.50
 -17  -4   2   -3.00    4.30
 -17  -4   2   -6.80    3.60
  17  -4  -2   -5.00    5.90
  17   4  -2   -4.20    7.20
  17   4  -2    1.40    4.60
 -17   4   2    5.20    5.40
 -17   4   2   -5.40    4.90
 -16  -4   2    4.80    3.90
 -16  -4   2    7.20    3.80
  16  -4  -2   12.00    5.60
  16   4  -2   11.20    7.10
  16   4  -2    4.50    4.00
 -16   4   2   11.30    4.70
 -16   4   2    8.70    4.70
 -15  -4   2    9.20    3.50
 -15  -4   2   14.50    3.40
  15  -4  -2   12.20    5.20
 -15   4   2    7.60    4.30
  15   4  -2   16.00    6.60
  15   4  -2   10.40    3.80
 -15   4   2   11.30    4.20
 -14  -4   2    9.90    3.10
 -14  -4   2    6.80    3.00
  14  -4  -2    6.40    2.60
  14  -4  -2    6.70    4.30
  14   4  -2   10.30    3.30
 -14   4   2    5.10    3.60
 -14   4   2   13.30    3.50
  14   4  -2   14.60    5.30
 -13  -4   2   10.30    2.80
  13  -4  -2    0.80    3.60
 -13  -4   2   11.90    3.00
  13  -4  -2   13.00    2.70
 -13   4   2    8.00    3.10
 -13   4   2   10.50    3.10
 -13   4   2   11.00    3.50
  13   4  -2   10.30    4.70
 -12  -4   2   41.10    4.10
  12  -4  -2   41.00    4.00
  12  -4  -2   48.50    5.50
  12  -4  -2   35.20    4.50
 -12  -4   2   32.90    4.20
  12  -4  -2   43.40    5.90
 -12   4   2   47.30    4.70
  12   4  -2   43.20    6.40
 -12   4   2   51.19    4.70
 -12   4   2   46.00    5.20
  12   4  -2   40.80    4.70
  11  -4  -2    8.60    3.00
 -11  -4   2    6.10    2.30
  11  -4  -2   12.10    3.00
  11  -4  -2    2.80    3.30
  11  -4  -2    3.50    2.80
 -11  -4   2    6.70    2.30
 -11   4   2    7.00    2.60
  11   4  -2    5.00    4.10
 -11   4   2    7.70    2.30
 -11   4   2    7.90    2.60
  11   4  -2    7.70    2.70
 -11   4   2    8.70    2.60
 -10  -4   2    0.30    1.70
 -10  -4   2    1.30    1.70
  10  -4  -2    5.00    2.50
  10  -4  -2   -1.00    2.70
  10  -4  -2   -1.60    2.10
 -10   4   2   -0.30    2.00
  10   4  -2    1.20    3.40
  10   4  -2    3.40    2.20
 -10   4   2    1.20    2.20
 -10   4   2    1.70    2.00
   9  -4  -2  214.78    8.00
   9  -4  -2  214.18    8.00
  -9  -4   2  214.98    7.50
  -9  -4   2  204.18    7.40
  -9  -4   2  199.78    8.60
   9  -4  -2  208.88    8.80
   9  -4  -2  200.38    8.00
  -9   4   2  218.18    7.80
   9   4  -2  220.88    9.30
  -9   4   2  208.38    7.70
  -9   4   2  211.98    7.90
   9   4  -2  212.88    8.10
  -9   4   2  216.88    8.40
  -9   4   2  205.28    8.80
   8  -4  -2  294.07    9.40
  -8  -4   2  278.17    8.90
   8  -4  -2  262.57    9.50
  -8  -4   2  273.87   10.20
  -8  -4   2  284.07    8.90
   8  -4  -2  272.17   10.20
  -8  -4   2  261.77    9.70
   8  -4  -2  295.07    9.40
  -8   4   2  272.27    9.40
  -8   4   2  269.37    9.70
   8   4  -2  280.77   10.50
  -8   4   2  279.77   10.10
   8   4  -2  264.57    8.80
   8   4  -2  256.97    8.80
  -8   4   2  285.57    9.20
  -8   4   2  288.17    9.20
   8   4  -2  268.77    9.50
   7  -4  -2  349.47   10.80
  -7  -4   2  342.67   10.40
  -7  -4   2  346.17   11.40
   7  -4  -2  356.56   10.80
   7  -4  -2  342.07   11.20
  -7  -4   2  333.97   11.50
   7  -4  -2  350.96   11.80
  -7  -4   2  351.36   10.40
  -7   4   2  342.67   11.60
  -7   4   2  340.37   10.60
   7   4  -2  349.17   11.20
  -7   4   2  349.07   11.10
   7   4  -2  337.17   11.90
   7   4  -2  345.87   10.40
   7   4  -2  342.87   10.40
  -7   4   2  347.87   10.60
  -7   4   2  338.77   11.20
  -6  -4   2  836.32   22.10
   6  -4  -2  808.62   23.80
   6  -4  -2  862.81   23.00
   6  -4  -2  821.22   22.90
  -6  -4   2  828.32   22.40
  -6  -4   2  822.92   22.50
  -6  -4   2  829.42   23.50
   6  -4  -2  794.32   23.40
  -6   4   2  844.42   23.70
   6   4  -2  828.92   23.90
  -6   4   2  812.82   23.40
  -6   4   2  835.82   23.30
  -6   4   2  849.32   22.80
   6   4  -2  803.82   22.40
   6   4  -2  841.62   22.50
   6   4  -2  799.82   23.30
   5  -4  -2    6.40    2.00
  -5  -4   2    6.00    1.10
  -5  -4   2    5.40    0.90
  -5  -4   2    5.30    1.00
   5  -4  -2    5.50    1.70
  -5  -4   2    5.90    1.70
   5   4  -2    6.60    1.10
   5   4  -2    5.20    1.60
   5   4  -2    5.00    1.00
  -5   4   2    5.90    1.60
   5   4  -2    8.10    2.10
  -5   4   2    5.80    1.80
   5   4  -2    5.20    1.00
  -4  -4   2   52.89    3.00
  -4  -4   2   52.69    2.20
  -4  -4   2   49.30    3.60
   4  -4  -2   51.99    3.30
  -4  -4   2   58.79    2.60
  -4  -4   2   52.99    2.10
   4  -4  -2   55.79    2.70
   4  -4  -2   58.49    2.70
  -4  -4   2   57.29    3.20
   4  -4  -2   52.29    3.60
   4  -4  -2   62.49    3.60
   4   4  -2   53.09    2.40
   4   4  -2   53.19    3.10
   4   4  -2   50.59    3.40
  -4   4   2   47.70    3.20
   4   4  -2   53.79    2.20
  -4   4   2   48.70    3.00
  -4   4   2   49.60    2.90
   4   4  -2   54.89    2.20
  -4   4   2   50.59    2.50
   3  -4  -2  480.95   15.40
  -3  -4   2  565.74   14.20
  -3  -4   2  595.64   15.50
   3  -4  -2  508.15   14.70
  -3  -4   2  560.14   15.20
  -3  -4   2  527.55   15.60
  -3  -4   2  536.75   14.00
   3  -4  -2  492.15   15.50
  -3  -4   2  582.44   14.20
   3  -4  -2  511.75   14.70
   3  -4  -2  518.15   15.90
  -3   4   2  506.05   14.60
  -3   4   2  504.55   14.50
   3   4  -2  539.75   15.40
  -3   4   2  508.65   14.70
  -3   4   2  511.45   14.70
   3   4  -2  589.74   15.40
  -3   4   2  492.45   15.30
  -3   4   2  495.35   15.00
  -3   4   2  491.25   15.30
   3   4  -2  589.94   14.20
   3   4  -2  565.64   15.60
  -2  -4   2   35.40    2.20
   2  -4  -2   32.20    1.80
  -2  -4   2   29.00    1.10
  -2  -4   2   32.00    2.20
  -2  -4   2   30.20    1.20
   2  -4  -2   30.00    2.70
   2  -4  -2   32.30    2.60
   2  -4  -2   28.70    1.70
   2  -4  -2   28.30    2.50
  -2  -4   2   33.70    2.60
   2  -4  -2   31.60    2.10
  -2  -4   2   28.10    2.00
  -2   4   2   29.00    2.70
  -2   4   2   33.40    1.80
  -2   4   2   23.70    2.30
  -2   4   2   31.50    1.70
   2   4  -2   27.80    2.40
   2   4  -2   28.00    2.00
  -2   4   2   31.70    1.70
  -2   4   2   30.80    2.00
   2   4  -2   29.50    1.20
   2   4  -2   29.10    2.10
  -2   4   2   29.00    2.30
  -2   4   2   28.50    1.60
   1  -4  -2  448.96   12.80
   1  -4  -2  434.66   12.30
   1  -4  -2  428.46   12.00
   1  -4  -2  451.35   12.10
   1  -4  -2  430.76   12.90
  -1  -4   2  439.06   12.60
   1  -4  -2  436.46   13.30
  -1  -4   2  442.76   13.00
  -1  -4   2  424.76   12.50
   1  -4  -2  452.35   13.10
  -1  -4   2  447.56   12.60
  -1  -4   2  453.55   12.40
  -1   4   2  441.36   12.80
  -1   4   2  443.06   12.00
  -1   4   2  458.55   12.10
  -1   4   2  453.15   12.00
   1   4  -2  423.76   12.90
  -1   4   2  421.96   12.80
  -1   4   2  383.06   12.60
   1   4  -2  451.75   12.80
  -1   4   2  447.46   12.10
   1   4  -2  416.66   12.50
   1   4  -2  434.46   12.60
  -1   4   2  424.66   13.30
   0  -4  -2  394.26   11.20
   0  -4  -2  374.96   11.30
   0  -4  -2  363.16   11.70
   0  -4  -2  366.76   10.40
   0  -4  -2  373.16   11.30
   0  -4  -2  367.06   10.30
   0  -4   2  371.96   11.40
   0  -4  -2  383.66   10.50
   0  -4   2  390.96   11.10
   0  -4   2  384.16   11.00
   0  -4   2  378.06   10.90
   0  -4   2  372.36    9.80
   0  -4   2  372.96   10.60
   0   4  -2  376.36   10.80
   0   4   2  361.76   11.10
   0   4  -2  367.76   11.10
   0   4  -2  372.46   11.40
   0   4  -2  381.56    9.90
   0   4   2  375.16   10.40
   0   4   2  366.36   10.40
   0   4   2  376.86   10.50
   0   4   2  368.96   10.20
   0   4  -2  364.36   11.00
   0   4   2  377.76   10.40
   0   4   2  350.86   11.60
   1  -4   2  738.23   19.80
   1  -4   2  722.43   19.10
   1  -4   2  733.33   20.30
  -1  -4  -2  733.13   20.40
   1  -4   2  736.53   20.30
  -1  -4  -2  710.13   20.40
  -1  -4  -2  724.53   19.60
   1  -4   2  736.73   20.60
   1  -4   2  727.73   19.20
  -1  -4  -2  734.93   19.50
  -1  -4  -2  733.93   21.00
   1  -4   2  738.13   19.90
  -1  -4  -2  717.43   19.60
  -1  -4  -2  759.72   20.50
  -1   4  -2  718.13   19.20
   1   4   2  726.23   20.30
  -1   4  -2  722.53   20.30
   1   4   2  718.53   20.90
   1   4   2  729.63   19.60
  -1   4  -2  726.13   20.40
   1   4   2  732.13   19.60
   1   4   2  739.63   19.50
  -1   4  -2  734.73   19.70
   1   4   2  721.03   19.50
  -2  -4  -2  217.78    6.60
  -2  -4  -2  216.88    7.30
   2  -4   2  218.18    6.90
   2  -4   2  217.08    6.30
   2  -4   2  216.08    6.40
   2  -4   2  224.48    6.60
  -2  -4  -2  226.38    6.40
   2  -4   2  230.08    7.40
  -2  -4  -2  212.78    8.00
  -2  -4  -2  219.38    6.60
   2  -4   2  222.78    7.70
   2  -4   2  210.08    7.30
  -2   4  -2  224.48    6.70
   2   4   2  212.08    7.40
   2   4   2  215.68    7.10
  -2   4  -2  215.18    7.40
  -2   4  -2  222.58    7.30
   2   4   2  216.28    7.90
   2   4   2  219.18    6.50
  -2   4  -2  221.18    6.40
  -2   4  -2  224.58    6.40
   2   4   2  227.08    6.60
   3  -4   2  297.27    9.20
   3  -4   2  282.67    8.20
  -3  -4  -2  291.07    8.20
   3  -4   2  277.67    9.10
   3  -4   2  286.07    8.30
  -3  -4  -2  295.37    8.50
  -3  -4  -2  275.77    9.90
   3  -4   2  285.37    8.10
  -3  -4  -2  284.37    9.00
   3  -4   2  296.07    8.80
  -3  -4  -2  276.27    8.40
   3   4   2  286.47    8.40
   3   4   2  287.07    8.80
  -3   4  -2  275.77    9.20
  -3   4  -2  290.27    8.30
   3   4   2  283.37    8.30
   3   4   2  278.77    9.80
   3   4   2  273.97    9.10
  -3   4  -2  285.77    9.10
  -3   4  -2  282.97    8.20
  -3   4  -2  290.87    8.60
   4  -4   2  160.98    6.10
   4  -4   2  162.18    6.20
  -4  -4  -2  158.28    5.50
   4  -4   2  167.88    5.80
   4  -4   2  164.28    5.40
  -4  -4  -2  166.58    6.10
   4  -4   2  167.48    5.00
  -4  -4  -2  166.08    5.30
   4  -4   2  158.18    5.40
  -4  -4  -2  162.08    5.50
   4   4   2  167.88    5.40
   4   4   2  161.28    7.00
   4   4   2  168.28    5.50
  -4   4  -2  161.68    6.20
   4   4   2  161.48    5.60
   4   4   2  165.28    6.20
  -4   4  -2  166.98    5.50
   5  -4   2  442.16   12.80
   5  -4   2  444.66   12.80
  -5  -4  -2  438.76   12.80
   5  -4   2  434.46   13.60
  -5  -4  -2  430.56   13.30
   5  -4   2  428.66   13.40
   5  -4   2  444.56   11.90
  -5  -4  -2  433.16   12.80
   5  -4   2  437.46   13.10
  -5   4  -2  447.46   13.60
   5   4   2  445.26   14.50
  -5   4  -2  435.16   12.80
   5   4   2  426.76   12.70
   5   4   2  445.26   13.40
  -5   4  -2  462.25   13.20
   5   4   2  451.65   12.70
   5   4   2  425.86   12.80
  -6  -4  -2   44.20    2.90
   6  -4   2   40.30    3.30
  -6  -4  -2   41.20    2.90
   6  -4   2   42.60    1.80
  -6  -4  -2   39.60    3.40
   6  -4   2   44.90    2.90
   6  -4   2   42.70    3.20
  -6   4  -2   42.10    3.50
   6   4   2   36.40    4.40
  -6   4  -2   42.10    2.80
   6   4   2   42.80    2.60
   6   4   2   40.20    3.30
   6   4   2   41.40    2.70
  -6   4  -2   48.90    2.90
  -6   4  -2   42.30    3.20
   6   4   2   33.50    2.80
   7  -4   2   22.80    2.90
  -7  -4  -2   18.70    2.30
  -7  -4  -2   21.50    2.70
   7  -4   2   24.70    2.70
   7  -4   2   22.60    2.80
  -7  -4  -2   18.40    2.30
   7  -4   2   17.40    2.30
   7   4   2   15.80    2.20
   7   4   2   16.80    2.20
  -7   4  -2   21.20    2.80
   7   4   2   29.40    4.50
   7   4   2   17.30    2.50
  -7   4  -2   23.00    2.90
  -7   4  -2   24.90    2.60
   7   4   2   17.50    2.40
  -7   4  -2   18.60    2.40
  -8  -4  -2   14.00    2.80
   8  -4   2   14.40    2.70
   8  -4   2   14.50    2.70
   8  -4   2    9.70    2.20
  -8  -4  -2   10.90    2.20
  -8  -4  -2    9.10    2.00
   8  -4   2   14.70    2.40
  -8   4  -2   12.50    2.60
  -8   4  -2    9.60    2.20
   8   4   2   12.00    2.50
  -8   4  -2    7.00    1.90
  -8   4  -2   12.60    2.80
   8   4   2    8.60    3.80
   9  -4   2   35.20    3.80
  -9  -4  -2   27.30    3.10
   9  -4   2   35.50    3.80
   9  -4   2   34.90    4.20
  -9  -4  -2   31.90    3.60
  -9   4  -2   39.00    4.20
  -9   4  -2   38.60    3.70
   9   4   2   32.00    3.80
   9   4   2   39.00    5.40
  -9   4  -2   28.20    3.60
  -9   4  -2   35.90    4.40
   9   4   2   34.00    2.40
  10  -4   2  130.09    6.50
 -10  -4  -2  119.69    6.20
 -10  -4  -2  129.09    6.30
  10  -4   2  128.19    6.40
  10  -4   2  130.49    6.90
  10   4   2  133.79    8.60
 -10   4  -2  124.19    6.90
 -10   4  -2  132.99    6.30
  10   4   2  130.89    6.40
  10   4   2  125.49    4.50
 -10   4  -2  130.69    6.60
 -10   4  -2  121.89    7.20
 -11  -4  -2   -0.40    2.40
  11  -4   2   -2.00    2.90
  11  -4   2   -1.80    2.80
  11  -4   2    5.90    3.10
 -11  -4  -2    1.90    2.20
  11   4   2   -5.00    4.10
 -11   4  -2    3.30    2.60
 -11   4  -2    1.90    2.80
  11   4   2    2.10    2.60
 -11   4  -2   -1.30    2.50
 -12  -4  -2   -3.80    2.40
 -12  -4  -2    3.80    2.70
  12   4   2    1.50    2.70
 -12   4  -2    1.20    3.10
 -12   4  -2   -0.30    2.80
  12   4   2   -4.20    4.30
 -12   4  -2   -0.60    2.80
 -13  -4  -2    6.90    3.30
 -13  -4  -2    9.70    3.40
  13   4   2    3.90    4.50
  13   4   2    7.70    5.50
 -13   4  -2    8.30    3.80
 -13   4  -2   10.80    4.30
 -14  -4  -2   -6.00    3.50
 -14  -4  -2   -2.20    3.30
 -14   4  -2    3.80    4.10
  14   4   2    2.00    3.50
  14   4   2    4.30    6.20
 -14   4  -2   -4.60    3.90
 -15  -4  -2   14.60    4.70
 -15  -4  -2    2.10    4.30
 -15   4  -2   15.50    5.20
 -15   4  -2   19.60    5.40
  15   4   2   12.10    7.20
  15   4   2   15.80    4.70
 -16  -5   2    0.80    3.90
 -16  -5   2   -0.60    3.70
  16  -5  -2   -1.10    5.60
 -16   5   2    7.80    4.70
  16   5  -2    0.40    4.40
 -16   5   2    1.90    4.90
  16   5  -2   12.00    6.90
 -15  -5   2   17.80    4.00
  15  -5  -2   21.30    5.90
 -15  -5   2   18.30    4.00
 -15   5   2   22.20    5.10
  15   5  -2   18.00    6.50
  15   5  -2   25.40    4.80
 -15   5   2   19.30    4.90
 -14  -5   2   15.70    3.50
  14  -5  -2   16.80    3.40
  14  -5  -2   17.00    5.00
 -14  -5   2   19.70    3.80
 -14   5   2   19.70    5.00
 -14   5   2   22.50    4.70
  14   5  -2   14.80    3.80
  14   5  -2   21.90    6.20
  13  -5  -2   75.39    5.10
 -13  -5   2   76.49    5.60
  13  -5  -2   90.09    7.80
 -13  -5   2   90.49    5.90
 -13   5   2   93.69    6.30
 -13   5   2   88.39    7.10
 -13   5   2   80.89    6.00
  13   5  -2   89.59    6.40
  13   5  -2   85.29    8.50
  12  -5  -2   11.00    4.10
  12  -5  -2    4.00    3.40
 -12  -5   2    6.50    2.40
  12  -5  -2   10.60    3.90
 -12  -5   2    6.00    2.40
 -12   5   2    5.20    2.70
  12   5  -2    6.30    4.50
 -12   5   2    6.00    2.90
 -12   5   2    3.70    3.20
  12   5  -2   10.70    3.10
 -11  -5   2   10.30    2.40
 -11  -5   2   14.90    2.60
  11  -5  -2    7.90    3.30
  11  -5  -2   11.70    3.80
  11  -5  -2   13.80    3.40
  11   5  -2   10.40    2.80
  11   5  -2   17.50    4.80
 -11   5   2   12.10    3.50
 -11   5   2   11.50    2.80
 -11   5   2   10.50    2.70
 -11   5   2   12.60    3.00
 -10  -5   2   14.30    2.30
  10  -5  -2   13.30    3.10
  10  -5  -2    9.70    3.40
  10  -5  -2   10.90    2.90
 -10  -5   2   13.90    2.50
  10   5  -2   15.80    3.00
 -10   5   2   15.30    2.80
 -10   5   2   13.80    3.00
 -10   5   2   13.10    3.10
  10   5  -2   20.10    4.30
 -10   5   2   10.20    2.40
  -9  -5   2   -1.80    1.40
   9  -5  -2    1.80    2.20
   9  -5  -2    0.40    2.00
   9  -5  -2    0.60    2.50
  -9  -5   2    0.50    1.40
  -9   5   2    1.60    2.30
  -9   5   2    0.40    1.70
  -9   5   2   -1.20    2.00
   9   5  -2   -1.90    1.90
  -9   5   2    5.80    3.20
   9   5  -2    2.70    3.20
  -9   5   2   -0.30    1.50
  -8  -5   2   28.80    2.60
   8  -5  -2   33.60    4.30
   8  -5  -2   30.80    3.90
   8  -5  -2   25.10    3.40
   8  -5  -2   27.50    3.30
  -8  -5   2   28.20    2.60
  -8   5   2   31.20    3.00
  -8   5   2   37.20    4.20
  -8   5   2   33.70    3.60
   8   5  -2   31.60    3.50
   8   5  -2   26.80    2.70
  -8   5   2   27.30    3.50
  -8   5   2   35.00    3.00
   8   5  -2   34.40    4.90
  -7  -5   2   10.80    1.60
   7  -5  -2    6.80    1.90
  -7  -5   2   16.00    2.80
  -7  -5   2   12.00    1.50
   7  -5  -2    9.70    1.90
   7  -5  -2   15.60    2.80
   7  -5  -2    7.20    2.60
  -7   5   2    9.80    1.80
  -7   5   2    8.40    2.20
  -7   5   2   12.80    2.40
   7   5  -2    6.70    1.40
   7   5  -2   12.20    2.40
   7   5  -2    7.60    2.90
  -7   5   2    6.20    2.50
  -7   5   2    8.80    1.70
   7   5  -2    9.50    1.60
   6  -5  -2  281.07    8.90
   6  -5  -2  286.37   10.50
  -6  -5   2  266.57    9.30
  -6  -5   2  279.57    8.40
  -6  -5   2  255.17    9.50
  -6  -5   2  276.17    8.20
   6  -5  -2  284.57   10.10
   6  -5  -2  278.07    9.80
   6  -5  -2  276.27    8.90
  -6  -5   2  275.97    8.40
   6   5  -2  271.17    8.30
  -6   5   2  280.97    9.80
   6   5  -2  272.87    8.40
  -6   5   2  285.07    9.50
   6   5  -2  273.47   10.10
  -6   5   2  276.77    8.80
  -6   5   2  286.87    9.50
   6   5  -2  268.97    9.40
   5  -5  -2  544.75   17.00
   5  -5  -2  543.75   16.60
  -5  -5   2  526.35   15.60
   5  -5  -2  539.75   16.40
  -5  -5   2  541.25   15.90
  -5  -5   2  531.15   14.70
  -5  -5   2  543.35   16.80
  -5  -5   2  529.35   16.20
   5  -5  -2  533.65   15.40
   5  -5  -2  547.35   15.40
  -5  -5   2  531.35   14.80
   5   5  -2  514.65   16.50
   5   5  -2  521.15   16.00
  -5   5   2  573.44   15.40
  -5   5   2  587.24   15.30
   5   5  -2  513.85   15.00
  -5   5   2  540.95   16.30
   5   5  -2  537.25   14.90
  -5   5   2  590.34   16.40
  -5   5   2  528.95   16.00
   5   5  -2  521.75   14.80
  -4  -5   2   24.80    2.60
   4  -5  -2   37.90    3.30
  -4  -5   2   24.30    1.40
  -4  -5   2   24.30    1.50
  -4  -5   2   26.10    2.20
  -4  -5   2   27.00    2.80
  -4  -5   2   26.30    3.30
  -4   5   2   30.70    2.90
   4   5  -2   27.70    1.50
   4   5  -2   29.90    2.70
   4   5  -2   21.50    3.10
   4   5  -2   25.10    2.10
   4   5  -2   31.00    1.70
  -4   5   2   27.80    2.60
  -3  -5   2 1419.36   38.00
   3  -5  -2 1411.56   39.20
   3  -5  -2 1424.76   38.20
  -3  -5   2 1472.15   36.90
   3  -5  -2 1384.36   37.60
   3  -5  -2 1370.06   38.70
   3  -5  -2 1421.56   37.50
  -3  -5   2 1572.34   38.60
   3  -5  -2 1372.26   38.70
  -3  -5   2 1413.46   38.10
  -3  -5   2 1411.26   38.90
   3   5  -2 1566.74   38.10
   3   5  -2 1392.76   36.90
   3   5  -2 1358.96   38.70
  -3   5   2 1396.86   37.50
  -3   5   2 1375.26   38.50
  -3   5   2 1376.26   37.40
  -3   5   2 1450.75   37.60
  -3   5   2 1396.36   38.40
  -3   5   2 1382.16   37.30
  -3   5   2 1386.46   38.10
  -2  -5   2   24.30    2.30
  -2  -5   2   21.80    2.90
   2  -5  -2   25.30    1.80
   2  -5  -2   18.10    2.50
   2  -5  -2   25.30    3.10
  -2  -5   2   24.30    2.40
   2  -5  -2   23.40    2.20
   2  -5  -2   26.00    2.80
   2  -5  -2   22.90    1.60
  -2  -5   2   23.40    2.40
   2  -5  -2   27.10    2.40
   2   5  -2   25.90    2.30
  -2   5   2   26.40    1.70
   2   5  -2   18.30    2.60
   2   5  -2   25.30    2.50
  -2   5   2   23.90    1.50
  -2   5   2   26.40    2.50
  -2   5   2   25.50    1.90
   2   5  -2   22.80    2.20
  -2   5   2   22.80    2.10
  -2   5   2   23.20    3.00
  -2   5   2   20.60    2.60
  -2   5   2   24.70    1.70
  -1  -5   2  606.34   17.30
  -1  -5   2  636.34   18.20
   1  -5  -2  605.04   18.00
  -1  -5   2  620.24   17.60
   1  -5  -2  641.14   18.20
   1  -5  -2  618.94   17.30
  -1  -5   2  636.94   17.60
   1  -5  -2  628.24   17.80
  -1  -5   2  595.74   17.50
   1  -5  -2  609.94   18.50
  -1   5   2  612.74   18.50
   1   5  -2  617.14   17.60
   1   5  -2  633.54   17.80
   1   5  -2  604.94   18.10
  -1   5   2  620.84   17.90
  -1   5   2  631.64   16.80
  -1   5   2  616.44   16.60
  -1   5   2  621.84   17.20
   1   5  -2  613.34   17.60
  -1   5   2  611.04   16.60
   0  -5   2   11.70    1.60
   0  -5  -2   11.00    1.40
   0  -5  -2   12.40    2.00
   0  -5   2   16.30    2.00
   0  -5  -2   11.10    1.20
   0  -5   2   20.00    2.70
   0  -5  -2    9.90    1.90
   0  -5  -2   13.30    2.10
   0  -5  -2   10.80    1.20
   0  -5  -2    9.50    2.20
   0  -5   2   10.70    1.50
   0  -5   2   10.10    1.80
   0   5   2   10.70    1.30
   0   5   2   11.50    2.50
   0   5  -2    8.80    1.50
   0   5  -2   13.40    1.90
   0   5   2   11.60    1.40
   0   5   2   12.70    2.10
   0   5  -2   11.20    2.10
   0   5   2    9.00    1.00
   0   5  -2   13.60    2.00
   0   5   2   10.00    1.30
   1  -5   2  173.18    6.70
  -1  -5  -2  169.08    5.30
  -1  -5  -2  177.08    6.50
  -1  -5  -2  167.18    5.20
   1  -5   2  169.98    6.30
  -1  -5  -2  165.58    5.50
   1  -5   2  171.98    5.80
  -1  -5  -2  172.48    6.30
   1  -5   2  163.58    4.80
   1  -5   2  172.08    5.70
  -1  -5  -2  160.28    6.30
   1  -5   2  172.78    6.20
  -1   5  -2  172.18    4.90
   1   5   2  169.48    5.20
   1   5   2  169.88    6.90
   1   5   2  156.48    5.20
   1   5   2  173.38    5.20
  -1   5  -2  161.98    5.80
   1   5   2  172.58    5.10
   1   5   2  167.38    5.60
   1   5   2  168.98    6.20
  -1   5  -2  168.28    6.20
  -1   5  -2  168.48    6.30
   2  -5   2   96.49    4.50
   2  -5   2   96.39    3.70
   2  -5   2   98.09    3.10
   2  -5   2   98.29    4.40
  -2  -5  -2   93.99    3.50
  -2  -5  -2   95.99    3.50
   2  -5   2   89.89    3.20
  -2  -5  -2   96.39    3.50
  -2  -5  -2   92.99    4.30
   2  -5   2   95.19    4.00
  -2  -5  -2   95.99    4.50
  -2  -5  -2   89.99    5.10
  -2  -5  -2   92.39    4.60
   2  -5   2  100.59    4.90
   2   5   2   98.89    5.20
  -2   5  -2   90.49    4.40
  -2   5  -2   93.29    3.10
   2   5   2   91.59    4.20
   2   5   2   93.69    3.40
  -2   5  -2   94.99    4.40
   2   5   2   95.49    3.30
  -3  -5  -2  185.08    6.00
   3  -5   2  187.18    5.70
  -3  -5  -2  186.28    6.00
  -3  -5  -2  182.78    7.80
   3  -5   2  188.98    6.50
  -3  -5  -2  187.78    5.90
   3  -5   2  193.18    7.50
   3  -5   2  186.18    7.00
  -3  -5  -2  179.68    6.80
   3  -5   2  189.28    7.00
   3  -5   2  183.78    5.80
  -3   5  -2  183.08    6.20
  -3   5  -2  186.98    7.00
   3   5   2  188.58    5.90
   3   5   2  186.38    5.80
   3   5   2  180.88    6.50
   3   5   2  187.48    7.70
  -3   5  -2  192.58    5.80
  -3   5  -2  180.48    6.80
   3   5   2  178.48    6.90
  -3   5  -2  191.98    5.70
   4  -5   2  317.17    9.90
   4  -5   2  304.57   10.30
   4  -5   2  317.47    9.20
   4  -5   2  314.07    9.10
   4  -5   2  308.27    9.30
   4  -5   2  320.57   10.50
  -4  -5  -2  312.77   11.40
  -4  -5  -2  311.77    9.30
  -4  -5  -2  307.47    9.40
  -4  -5  -2  306.97   10.20
  -4  -5  -2  308.97    9.40
  -4   5  -2  311.17    9.20
  -4   5  -2  315.97   10.50
  -4   5  -2  325.47   10.40
  -4   5  -2  317.57    9.70
   4   5   2  310.97   10.40
   4   5   2  305.47    9.70
  -4   5  -2  313.47    9.30
   4   5   2  299.97   11.10
   4   5   2  314.27    9.20
   4   5   2  307.17    9.30
   5  -5   2  122.09    5.70
  -5  -5  -2  116.19    5.50
   5  -5   2  127.09    4.70
   5  -5   2  126.49    5.90
  -5  -5  -2  123.49    4.80
   5  -5   2  126.59    5.30
  -5  -5  -2  129.39    4.60
   5  -5   2  127.79    4.20
   5  -5   2  124.69    4.70
  -5  -5  -2  122.19    4.80
   5   5   2  122.59    4.80
  -5   5  -2  123.69    4.70
  -5   5  -2  126.39    5.20
   5   5   2  121.39    4.60
   5   5   2  124.99    5.70
  -5   5  -2  118.19    5.60
   5   5   2  122.19    4.70
   5   5   2  120.99    6.50
  -5   5  -2  122.59    4.70
  -6  -5  -2  380.36   11.40
  -6  -5  -2  344.07   12.10
  -6  -5  -2  381.56   11.40
   6  -5   2  372.56   10.40
   6  -5   2  384.06   12.00
  -6  -5  -2  386.76   11.20
   6  -5   2  371.56   11.30
   6  -5   2  355.36   12.20
   6  -5   2  367.96   11.40
  -6   5  -2  380.96   12.40
   6   5   2  377.36   13.50
   6   5   2  365.26   12.20
  -6   5  -2  390.26   11.90
   6   5   2  375.86   11.10
   6   5   2  358.16   11.30
  -6   5  -2  375.26   11.40
   7  -5   2  194.08    7.60
   7  -5   2  190.48    7.10
   7  -5   2  194.58    5.80
   7  -5   2  198.88    7.10
  -7  -5  -2  197.58    7.10
  -7  -5  -2  191.58    7.10
  -7   5  -2  195.78    8.00
  -7   5  -2  196.08    7.10
   7   5   2  185.98    7.80
   7   5   2  194.08    6.50
   7   5   2  200.58    9.30
  -7   5  -2  196.38    7.10
  -7   5  -2  193.08    7.70
   8  -5   2   17.20    2.70
   8  -5   2   17.30    1.50
   8  -5   2   21.80    3.30
   8  -5   2   21.90    2.70
  -8  -5  -2   20.40    2.70
  -8  -5  -2   18.00    2.40
   8   5   2   16.20    2.20
   8   5   2   21.70    4.50
  -8   5  -2   18.60    3.30
  -8   5  -2   20.70    2.70
  -8   5  -2   19.30    3.30
   8   5   2   21.90    3.50
  -8   5  -2   21.90    2.80
   9  -5   2  141.59    7.10
   9  -5   2  136.69    6.40
  -9  -5  -2  149.29    6.40
   9  -5   2  142.29    6.60
  -9  -5  -2  139.79    6.40
   9   5   2  138.79    5.50
   9   5   2  147.19    8.70
  -9   5  -2  135.49    7.10
   9   5   2  144.69    7.00
  -9   5  -2  143.29    6.40
  -9   5  -2  147.49    6.60
  -9   5  -2  134.59    7.20
 -10  -5  -2    3.30    2.20
  10  -5   2    8.40    3.00
 -10  -5  -2    7.80    2.40
  10  -5   2    7.00    3.20
  10  -5   2    1.20    2.60
 -10   5  -2    5.00    2.60
 -10   5  -2    6.50    3.00
 -10   5  -2    6.30    2.70
  10   5   2    6.30    1.50
  10   5   2    1.40    2.60
  10   5   2    5.50    4.20
  11  -5   2   10.20    3.50
 -11  -5  -2    5.90    2.70
  11  -5   2    7.30    3.40
 -11  -5  -2    6.70    2.60
  11   5   2    3.50    4.50
 -11   5  -2    6.90    3.30
 -11   5  -2    9.00    3.20
  11   5   2    9.50    3.80
 -12  -5  -2    5.00    3.00
  12  -5   2    3.20    3.80
 -12  -5  -2    7.00    3.10
 -12   5  -2    5.90    3.60
  12   5   2    7.50    3.40
 -12   5  -2    0.50    3.10
  12   5   2   11.30    5.50
 -13  -5  -2   13.80    3.80
 -13  -5  -2   12.20    3.70
 -13   5  -2   11.30    4.40
  13   5   2    9.90    4.00
 -13   5  -2   16.00    4.50
  13   5   2   22.70    6.00
 -14  -5  -2   16.90    4.20
 -14  -5  -2   18.70    4.40
 -14   5  -2   18.10    4.90
  14   5   2   22.60    4.90
  14   5   2   12.70    6.70
 -14   5  -2   16.10    4.70
 -15  -5  -2    3.20    4.20
 -15  -5  -2    4.80    4.60
  15   5   2   -2.60    4.60
  15   5   2    9.40    7.30
 -15   5  -2    2.30    5.50
 -15   5  -2    6.90    5.10
  16   6  -2    3.80    7.20
 -15  -6   2   37.00    4.70
  15  -6  -2   40.70    7.00
 -15  -6   2   32.70    4.60
 -15   6   2   35.10    5.70
  15   6  -2   44.90    7.90
  15   6  -2   30.30    5.50
 -15   6   2   38.80    5.80
 -14  -6   2   11.60    3.50
  14  -6  -2    0.90    5.10
 -14  -6   2    3.70    2.90
 -14   6   2    7.10    4.20
  14   6  -2    5.40    4.10
  14   6  -2   16.10    6.40
 -14   6   2   17.20    4.70
 -13  -6   2   43.20    5.00
  13  -6  -2   33.90    6.00
 -13  -6   2   40.90    4.90
 -13   6   2   43.40    5.60
  13   6  -2   36.50    5.30
 -13   6   2   48.90    5.60
  13   6  -2   43.50    6.90
 -12  -6   2  112.49    6.10
 -12  -6   2  107.29    6.20
  12  -6  -2  121.29    8.50
  12   6  -2  125.29    9.10
  12   6  -2  102.49    7.10
 -12   6   2  114.99    7.30
 -12   6   2  118.69    7.60
 -12   6   2  116.29    6.80
  11  -6  -2   37.10    5.30
 -11  -6   2   29.40    3.80
  11  -6  -2   43.70    5.80
  11  -6  -2   30.60    4.40
 -11  -6   2   25.20    4.00
 -11   6   2   33.40    4.40
 -11   6   2   37.20    4.10
 -11   6   2   30.80    3.60
  11   6  -2   38.40    6.10
 -11   6   2   38.50    4.80
  11   6  -2   29.80    4.20
  10  -6  -2  397.96   14.10
  10  -6  -2  369.66   12.60
 -10  -6   2  361.56   11.90
  10  -6  -2  369.16   12.70
 -10  -6   2  360.56   11.80
 -10   6   2  360.46   13.30
 -10   6   2  376.46   13.20
 -10   6   2  365.56   12.30
 -10   6   2  383.06   12.60
  10   6  -2  352.96   14.30
  -9  -6   2  127.49    5.30
  -9  -6   2  125.09    5.40
   9  -6  -2  121.69    6.20
   9  -6  -2  124.69    7.50
   9  -6  -2  122.39    6.20
   9   6  -2  134.19    7.80
  -9   6   2  127.59    6.80
  -9   6   2  121.39    6.70
   9   6  -2  117.79    6.50
  -9   6   2  126.79    5.80
  -9   6   2  125.69    5.90
  -8  -6   2   22.40    2.50
  -8  -6   2   22.80    2.50
  -8  -6   2   19.10    3.10
   8  -6  -2   26.90    4.20
   8  -6  -2   22.50    3.00
   8  -6  -2   17.70    2.60
   8   6  -2   27.90    3.50
  -8   6   2   15.20    2.80
  -8   6   2   27.60    3.10
  -8   6   2   24.70    3.70
  -8   6   2   28.10    4.10
   8   6  -2   24.50    4.10
   7  -6  -2    1.80    1.60
  -7  -6   2    1.90    1.20
   7  -6  -2    5.20    2.70
   7  -6  -2    2.20    1.80
  -7  -6   2    3.50    2.20
  -7  -6   2    1.90    1.20
  -7   6   2    2.90    2.00
  -7   6   2    0.00    2.00
   7   6  -2    0.80    1.30
   7   6  -2   -0.40    2.00
  -7   6   2   -0.90    1.30
  -7   6   2    0.90    1.40
  -7   6   2    0.20    2.30
   7   6  -2   -1.20    2.70
   6  -6  -2   26.80    3.50
  -6  -6   2   28.40    2.60
  -6  -6   2   32.90    3.40
   6  -6  -2   24.70    2.80
  -6  -6   2   26.90    1.90
  -6  -6   2   29.20    2.10
   6  -6  -2   25.50    2.80
   6   6  -2   24.30    2.10
  -6   6   2   25.90    3.30
   6   6  -2   24.30    2.20
   6   6  -2   34.30    4.30
  -6   6   2   25.70    2.60
   6   6  -2   27.20    2.30
  -6   6   2   22.60    2.40
   6   6  -2   26.30    3.30
  -6   6   2   28.20    3.60
  -6   6   2   27.60    3.30
   5  -6  -2   66.69    4.90
   5  -6  -2   58.49    3.50
  -5  -6   2   62.79    2.70
  -5  -6   2   61.39    3.50
   5  -6  -2   68.49    3.50
  -5  -6   2   70.29    2.50
  -5  -6   2   68.49    4.10
   5  -6  -2   68.39    5.20
  -5  -6   2   57.19    4.30
   5  -6  -2   69.59    4.00
   5  -6  -2   68.89    5.00
  -5  -6   2   62.79    5.20
   5   6  -2   67.19    4.30
   5   6  -2   67.29    2.70
   5   6  -2   70.89    2.90
  -5   6   2   72.69    3.40
  -5   6   2   55.79    3.40
  -5   6   2   71.09    4.40
   5   6  -2   62.19    4.80
  -5   6   2   77.09    4.30
   5   6  -2   62.09    3.30
   4  -6  -2    1.40    1.20
   4  -6  -2    2.40    1.60
   4  -6  -2    3.50    2.50
   4  -6  -2    6.40    2.40
  -4  -6   2    2.60    1.50
  -4  -6   2    1.50    0.70
  -4  -6   2    1.10    1.60
  -4  -6   2    2.80    2.10
   4  -6  -2    0.60    1.90
   4  -6  -2    0.70    1.20
  -4  -6   2   -0.50    2.40
   4   6  -2    2.50    0.70
  -4   6   2    2.60    1.70
  -4   6   2    0.20    1.00
   4   6  -2    0.50    1.30
  -4   6   2    2.10    1.00
   4   6  -2    1.50    2.00
  -4   6   2    2.50    1.30
  -4   6   2    0.60    1.20
  -4   6   2    0.30    1.40
   4   6  -2    1.70    0.90
  -4   6   2   -1.80    1.60
   4   6  -2    3.50    1.70
   3  -6  -2    4.50    1.20
   3  -6  -2    2.50    1.70
  -3  -6   2    5.40    1.80
  -3  -6   2    4.00    1.70
   3  -6  -2    7.10    2.10
  -3  -6   2    2.00    2.40
   3  -6  -2    4.40    1.20
  -3  -6   2    1.80    1.60
   3  -6  -2    4.90    1.70
   3  -6  -2    0.20    1.90
   3  -6  -2    3.50    2.20
   3   6  -2    3.90    1.70
  -3   6   2    4.70    1.00
  -3   6   2    3.60    1.70
   3   6  -2    5.60    2.30
  -3   6   2    4.20    1.20
  -3   6   2    2.80    1.50
   3   6  -2    4.20    1.50
  -3   6   2    4.90    1.70
  -3   6   2    4.60    1.30
   2  -6  -2  296.07    9.50
   2  -6  -2  295.17    8.60
   2  -6  -2  292.87   10.70
   2  -6  -2  296.17   10.10
  -2  -6   2  294.27    9.60
  -2  -6   2  283.17    9.60
   2  -6  -2  291.07   10.20
  -2  -6   2  288.67    9.60
  -2  -6   2  296.27   10.40
  -2  -6   2  298.57    9.50
   2  -6  -2  298.67    9.70
   2   6  -2  298.57    9.80
  -2   6   2  297.67    8.70
  -2   6   2  289.17    9.70
  -2   6   2  300.17   10.00
  -2   6   2  292.97    9.40
  -2   6   2  287.77    8.40
  -2   6   2  304.87   10.80
   2   6  -2  291.37    9.90
  -2   6   2  299.07    8.40
   2   6  -2  295.77    9.60
   2   6  -2  292.37   10.30
   1  -6  -2  180.68    6.90
   1  -6  -2  186.28    7.30
   1  -6  -2  180.98    7.70
  -1  -6   2  185.58    6.70
  -1  -6   2  184.98    6.50
  -1  -6   2  186.48    7.00
   1  -6  -2  203.98    7.40
  -1  -6   2  191.78    7.60
  -1  -6   2  175.08    6.70
   1  -6  -2  187.78    6.50
  -1   6   2  181.08    5.40
   1   6  -2  173.38    7.40
  -1   6   2  193.58    5.80
   1   6  -2  177.78    6.70
   1   6  -2  178.18    6.80
  -1   6   2  193.18    5.60
  -1   6   2  180.28    6.30
   1   6  -2  184.98    7.00
  -1   6   2  179.88    7.00
   0  -6   2    0.90    1.40
   0  -6   2    0.10    1.60
   0  -6   2    1.70    1.50
   0  -6  -2   -2.50    2.10
   0  -6   2    0.90    1.30
   0  -6  -2    1.20    1.90
   0  -6  -2   -0.50    1.40
   0  -6  -2    2.80    0.90
   0  -6  -2    0.60    1.20
   0  -6  -2   -1.30    1.60
   0  -6   2    1.20    2.10
   0   6  -2   -0.60    1.20
   0   6   2    3.70    1.20
   0   6   2    0.60    0.80
   0   6  -2    1.00    2.00
   0   6  -2   -0.20    1.40
   0   6   2    2.30    2.00
   0   6  -2   -0.30    1.50
   0   6   2    0.10    0.60
   0   6   2   -1.00    1.10
   0   6   2   -0.60    1.40
   1  -6   2    1.30    1.90
   1  -6   2    0.50    0.50
  -1  -6  -2    1.30    0.90
  -1  -6  -2    2.20    1.90
   1  -6   2    1.10    1.60
  -1  -6  -2    1.10    2.30
  -1  -6  -2    0.50    1.60
  -1  -6  -2    1.40    1.20
   1  -6   2   -0.40    1.20
   1  -6   2    1.10    1.20
   1  -6   2    1.50    1.70
  -1  -6  -2    0.40    0.80
  -1  -6  -2    1.30    1.60
   1   6   2    1.80    1.20
   1   6   2    1.10    0.80
  -1   6  -2    2.00    1.50
   1   6   2    2.20    0.70
  -1   6  -2    0.90    1.60
   1   6   2    1.10    2.20
  -1   6  -2    1.10    0.50
   1   6   2    1.40    1.50
   1   6   2    1.10    0.80
   2  -6   2  268.17    8.60
   2  -6   2  279.87    9.40
  -2  -6  -2  267.17    9.60
   2  -6   2  277.57    9.00
   2  -6   2  281.67   10.10
  -2  -6  -2  283.17    8.40
   2  -6   2  279.57    7.80
  -2  -6  -2  278.97    8.20
   2  -6   2  274.47    9.60
  -2  -6  -2  273.97    9.60
  -2  -6  -2  271.97   10.50
  -2  -6  -2  280.67    8.10
  -2  -6  -2  269.27    9.40
  -2   6  -2  270.37    9.60
   2   6   2  282.77    9.30
  -2   6  -2  272.57    9.40
   2   6   2  282.47    8.20
   2   6   2  272.97   10.30
   2   6   2  283.97    8.10
   2   6   2  278.17    8.10
   2   6   2  272.37    7.90
  -2   6  -2  277.87    7.60
  -2   6  -2  249.38    7.80
   3  -6   2  213.78    8.60
   3  -6   2  202.18    7.90
   3  -6   2  206.28    7.40
   3  -6   2  210.48    6.80
  -3  -6  -2  209.48    6.60
  -3  -6  -2  205.28    6.60
  -3  -6  -2  189.88    8.80
   3  -6   2  207.28    6.40
  -3  -6  -2  206.08    8.00
   3  -6   2  201.48    7.90
   3  -6   2  211.98    6.20
  -3  -6  -2  190.58    7.70
  -3  -6  -2  211.78    6.50
   3   6   2  201.28    8.70
   3   6   2  214.18    6.40
   3   6   2  211.38    6.50
  -3   6  -2  205.08    8.00
   3   6   2  200.58    7.30
  -3   6  -2  207.68    6.40
  -3   6  -2  210.88    7.80
  -3   6  -2  211.88    7.00
  -3   6  -2  212.18    6.20
  -4  -6  -2  163.28    6.80
   4  -6   2  178.18    6.70
   4  -6   2  169.08    5.70
   4  -6   2  170.38    5.80
   4  -6   2  173.08    5.60
  -4  -6  -2  171.08    8.50
   4  -6   2  164.28    7.20
   4  -6   2  165.88    7.20
  -4  -6  -2  176.48    5.90
  -4  -6  -2  168.88    5.80
  -4  -6  -2  179.98    5.90
   4  -6   2  165.78    7.80
  -4   6  -2  175.38    7.10
   4   6   2  170.38    5.80
   4   6   2  174.78    8.10
  -4   6  -2  165.48    7.20
  -4   6  -2  170.98    6.20
  -4   6  -2  171.98    5.70
  -4   6  -2  168.98    5.60
   4   6   2  162.58    5.60
   4   6   2  172.88    6.40
   4   6   2  163.68    7.20
   5  -6   2    1.00    1.90
   5  -6   2    1.20    1.30
  -5  -6  -2    2.90    1.40
   5  -6   2    1.60    1.30
  -5  -6  -2    1.80    1.30
   5  -6   2    2.20    1.30
   5  -6   2    3.40    2.90
  -5  -6  -2    1.40    1.40
   5   6   2    0.50    1.90
   5   6   2    3.10    1.60
   5   6   2    4.20    3.10
  -5   6  -2    3.00    1.40
  -5   6  -2    2.10    1.20
   5   6   2   -1.20    1.30
  -5   6  -2    1.70    1.90
  -5   6  -2    1.90    1.70
   6  -6   2   22.80    3.10
  -6  -6  -2   28.70    2.70
  -6  -6  -2   27.30    2.70
   6  -6   2   25.80    3.50
   6  -6   2   23.10    2.80
   6  -6   2   26.60    2.80
  -6  -6  -2   30.60    2.80
   6   6   2   35.10    5.10
   6   6   2   22.70    2.60
  -6   6  -2   23.90    3.10
   6   6   2   28.80    3.70
  -6   6  -2   25.30    2.70
  -6   6  -2   31.10    2.70
  -6   6  -2   29.70    3.40
  -7  -6  -2   13.20    2.10
   7  -6   2   16.50    1.70
  -7  -6  -2   15.20    2.30
   7  -6   2   17.20    2.50
  -7  -6  -2   16.20    2.30
   7  -6   2   14.60    2.40
   7  -6   2   15.20    2.90
   7   6   2   18.20    2.20
  -7   6  -2   22.10    2.70
  -7   6  -2   18.90    2.30
   7   6   2   15.50    4.10
  -7   6  -2   12.20    2.80
   7   6   2   14.60    2.90
  -7   6  -2   19.90    3.00
  -8  -6  -2  437.26   13.60
  -8  -6  -2  444.96   13.60
   8  -6   2  415.26   12.00
  -8  -6  -2  425.36   13.30
   8  -6   2  422.66   13.50
   8  -6   2  458.15   14.50
   8  -6   2  441.56   13.70
   8   6   2  415.76   14.60
   8   6   2  426.06   12.70
   8   6   2  442.56   16.30
  -8   6  -2  439.16   14.80
  -8   6  -2  434.56   13.60
  -8   6  -2  421.36   14.20
  -9  -6  -2  198.38    8.00
   9  -6   2  195.08    8.10
   9  -6   2  210.88    9.00
  -9  -6  -2  202.08    8.00
   9  -6   2  207.08    8.30
   9   6   2  189.88    6.60
  -9   6  -2  193.18    8.90
  -9   6  -2  200.88    9.00
  -9   6  -2  193.48    8.10
   9   6   2  204.68    9.10
  -9   6  -2  204.28    8.00
   9   6   2  198.98   10.60
 -10  -6  -2   42.10    4.50
  10  -6   2   40.00    4.90
 -10  -6  -2   50.09    4.60
  10   6   2   36.10    6.00
  10   6   2   49.00    5.40
 -10   6  -2   41.90    4.90
 -10   6  -2   49.40    5.80
 -11  -6  -2   78.09    6.00
 -11  -6  -2   81.09    5.90
  11  -6   2   86.79    6.90
  11   6   2   87.49    6.70
 -11   6  -2   95.89    7.40
  11   6   2   97.59    9.00
 -11   6  -2   86.79    6.40
 -12  -6  -2   14.10    3.50
  12  -6   2   23.50    4.50
 -12  -6  -2   15.80    3.80
 -12   6  -2    7.10    3.90
 -12   6  -2   23.40    4.90
  12   6   2   10.90    4.20
  12   6   2   21.90    6.10
  13  -6   2    9.60    4.60
 -13  -6  -2    8.60    3.60
 -13  -6  -2    8.90    3.80
  13   6   2    6.50    6.40
 -13   6  -2   12.40    4.50
 -13   6  -2   12.10    4.90
  13   6   2    7.20    4.40
 -14  -6  -2   12.60    4.20
 -14  -6  -2   13.40    4.00
 -14   6  -2   11.20    5.20
  14   6   2   16.40    7.40
 -14   6  -2   12.60    5.30
  14   6   2   14.10    5.00
 -15  -7   2    2.80    3.80
  15  -7  -2    6.90    6.60
 -15  -7   2   11.00    4.10
  15   7  -2    2.80    5.10
  15   7  -2   11.40    7.40
 -15   7   2    2.80    5.60
 -14  -7   2   44.80    5.70
  14  -7  -2   33.70    6.50
 -14  -7   2   26.60    4.10
  14   7  -2   31.50    7.60
 -14   7   2   27.50    5.40
  14   7  -2   28.50    5.50
 -13  -7   2   14.00    3.40
 -13  -7   2    5.90    2.90
  13  -7  -2   11.00    5.30
  13   7  -2   15.90    6.50
 -13   7   2   15.90    4.80
  13   7  -2    8.60    4.30
 -13   7   2   17.30    4.40
 -12  -7   2   37.90    4.60
  12  -7  -2   36.60    6.30
 -12  -7   2   46.30    4.80
  12   7  -2   36.80    5.30
  12   7  -2   50.49    7.20
 -12   7   2   46.60    5.80
 -12   7   2   38.80    5.30
 -12   7   2   49.00    5.50
 -11  -7   2   11.80    2.60
 -11  -7   2    7.80    2.50
  11  -7  -2    9.00    5.90
 -11   7   2   16.40    4.10
 -11   7   2   16.20    4.10
  11   7  -2    5.20    3.60
 -11   7   2   16.30    3.50
  11   7  -2   16.50    5.10
  10  -7  -2   71.79    7.10
 -10  -7   2   76.29    4.60
 -10  -7   2   76.79    4.60
  10   7  -2   92.49    7.60
  10   7  -2   79.49    6.40
 -10   7   2   75.59    5.30
 -10   7   2   78.99    6.30
 -10   7   2   83.29    6.30
   9  -7  -2   10.60    2.70
   9  -7  -2   11.80    3.00
   9  -7  -2   12.20    3.90
   9  -7  -2   10.30    2.80
  -9  -7   2    5.20    1.80
  -9  -7   2    9.70    2.00
   9   7  -2    7.30    3.90
  -9   7   2   15.70    3.60
   9   7  -2    7.60    2.80
  -9   7   2    3.20    2.10
  -9   7   2    9.60    2.50
  -8  -7   2  144.49    5.40
   8  -7  -2  136.09    6.40
   8  -7  -2  133.09    6.20
   8  -7  -2  144.09    6.40
  -8  -7   2  153.68    5.60
  -8  -7   2  130.99    6.90
   8  -7  -2  138.59    8.00
  -8   7   2  143.79    7.30
  -8   7   2  138.69    5.90
   8   7  -2  146.99    8.30
   8   7  -2  140.49    8.10
  -8   7   2  147.69    7.60
  -8   7   2  148.09    6.20
  -7  -7   2  407.56   12.70
  -7  -7   2  414.66   12.00
  -7  -7   2  391.16   13.30
   7  -7  -2  415.76   12.90
  -7  -7   2  420.66   11.70
   7  -7  -2  413.06   14.60
   7  -7  -2  387.36   12.80
   7  -7  -2  423.46   12.80
  -7   7   2  417.76   12.40
   7   7  -2  399.16   12.10
  -7   7   2  361.16   13.30
   7   7  -2  423.16   14.80
   7   7  -2  411.76   13.90
  -7   7   2  426.36   14.10
  -7   7   2  407.76   13.80
  -6  -7   2    6.20    2.00
  -6  -7   2    5.80    2.30
  -6  -7   2    3.10    1.10
   6  -7  -2    4.40    2.20
   6  -7  -2    1.30    2.70
   6  -7  -2    6.90    1.90
  -6  -7   2    3.00    1.20
   6  -7  -2    2.90    2.00
  -6  -7   2    5.60    1.10
  -6   7   2    6.70    2.70
  -6   7   2    6.10    2.50
  -6   7   2    5.70    1.70
   6   7  -2    1.00    2.00
   6   7  -2    6.20    1.50
   6   7  -2    3.90    1.70
  -6   7   2    7.40    2.70
   6   7  -2    5.40    3.20
  -6   7   2    3.70    1.40
   5  -7  -2    3.40    2.90
   5  -7  -2    7.40    2.20
   5  -7  -2    5.00    1.70
  -5  -7   2    3.80    2.10
   5  -7  -2    0.40    1.50
  -5  -7   2    2.20    0.90
  -5  -7   2    5.00    2.00
  -5  -7   2   -0.50    3.10
  -5   7   2   -1.30    2.00
   5   7  -2    2.60    1.20
   5   7  -2    3.40    1.60
  -5   7   2    3.40    1.40
  -5   7   2    2.40    1.70
   5   7  -2    1.20    2.80
  -5   7   2    4.30    2.10
   5   7  -2    1.90    0.90
   5   7  -2   -1.50    2.00
  -5   7   2   -2.80    2.10
  -5   7   2    2.10    1.30
   4  -7  -2   23.60    2.20
  -4  -7   2   22.90    1.30
  -4  -7   2   26.70    4.00
   4  -7  -2   23.60    3.50
  -4  -7   2   26.80    3.40
   4  -7  -2   20.70    2.50
   4  -7  -2   26.80    3.00
  -4  -7   2   19.40    2.70
   4   7  -2   26.40    3.40
   4   7  -2   24.20    1.60
  -4   7   2   24.50    2.00
  -4   7   2   21.80    2.60
  -4   7   2   27.70    3.50
  -4   7   2   21.50    2.10
  -4   7   2   20.30    2.80
   4   7  -2   20.40    2.90
  -4   7   2   20.00    2.90
   4   7  -2   24.40    3.80
   3  -7  -2  129.39    5.70
  -3  -7   2  122.19    5.50
   3  -7  -2  123.49    4.10
  -3  -7   2  114.09    5.80
  -3  -7   2  116.69    5.50
  -3  -7   2  116.49    6.80
  -3  -7   2  126.69    5.70
   3  -7  -2  124.69    6.40
   3  -7  -2  119.79    5.70
  -3   7   2  124.49    6.10
  -3   7   2  124.99    5.90
  -3   7   2  131.59    5.10
  -3   7   2  126.79    4.70
   3   7  -2  124.89    5.50
  -3   7   2  127.99    4.20
   3   7  -2  121.59    5.90
  -3   7   2  120.79    5.50
   3   7  -2  123.39    6.60
  -3   7   2  119.09    4.30
   2  -7  -2  318.97   10.50
   2  -7  -2  290.77   11.10
   2  -7  -2  309.17   10.20
   2  -7  -2  301.87   10.90
  -2  -7   2  300.97   10.40
  -2  -7   2  313.57   10.50
  -2  -7   2  300.87   10.20
  -2  -7   2  307.57   10.20
  -2  -7   2  311.47   11.40
   2   7  -2  296.97   10.60
  -2   7   2  313.77    9.10
   2   7  -2  317.17   10.40
  -2   7   2  310.37   10.70
   2   7  -2  302.77   11.20
  -2   7   2  307.67    8.60
   2   7  -2  304.27   10.40
  -2   7   2  306.57   10.10
  -2   7   2  307.37   11.60
  -2   7   2  307.77    8.70
   1  -7  -2    3.50    2.10
   1  -7  -2    2.50    2.40
   1  -7  -2    4.50    2.20
  -1  -7   2    0.70    2.20
  -1  -7   2    2.20    2.00
  -1  -7   2    0.70    1.60
  -1  -7   2    0.80    2.70
   1  -7  -2    1.40    1.60
   1  -7  -2    7.70    3.60
  -1  -7   2   -2.00    1.60
  -1   7   2    4.90    2.70
   1   7  -2    0.20    1.60
  -1   7   2   -0.70    0.80
   1   7  -2   -0.40    1.70
   1   7  -2    1.20    1.80
  -1   7   2    0.50    1.00
  -1   7   2    2.60    1.90
   1   7  -2   -0.30    2.20
   0  -7  -2  447.66   16.50
   0  -7   2  419.96   13.20
   0  -7   2  421.76   14.20
   0  -7  -2  413.36   13.90
   0  -7  -2  409.86   13.50
   0  -7  -2  426.86   12.80
   0  -7  -2  414.06   13.80
   0  -7   2  423.76   13.10
   0  -7   2  422.76   13.40
   0  -7   2  425.06   13.70
   0   7   2  421.76   14.50
   0   7   2  426.96   11.50
   0   7   2  420.36   11.40
   0   7  -2  431.16   13.70
   0   7   2  427.66   11.90
   0   7  -2  418.46   13.50
   0   7   2  439.66   12.90
   0   7   2  424.16   11.80
   0   7   2  428.66   13.60
   0   7  -2  432.66   13.40
  -1  -7  -2  143.09    5.50
   1  -7   2  141.69    5.90
  -1  -7  -2  144.39    6.70
  -1  -7  -2  138.29    6.60
   1  -7   2  134.69    6.30
  -1  -7  -2  145.89    4.80
   1  -7   2  143.79    7.20
   1  -7   2  140.29    5.90
  -1  -7  -2  143.59    7.20
   1  -7   2  132.49    6.50
   1   7   2  149.49    5.80
  -1   7  -2  145.39    6.60
   1   7   2  145.99    4.40
   1   7   2  138.39    4.30
   1   7   2  147.69    6.30
   1   7   2  144.29    4.70
  -1   7  -2  145.09    6.40
   1   7   2  146.79    7.30
  -2  -7  -2  153.78    5.70
   2  -7   2  152.98    6.70
  -2  -7  -2  155.38    7.00
  -2  -7  -2  147.89    4.70
  -2  -7  -2  157.58    7.10
  -2  -7  -2  150.08    5.20
   2  -7   2  145.59    6.00
   2  -7   2  146.79    7.50
   2  -7   2  147.99    6.30
   2  -7   2  155.58    4.70
   2   7   2  161.78    5.00
   2   7   2  147.19    7.70
   2   7   2  157.08    5.00
  -2   7  -2  153.78    6.90
   2   7   2  154.78    6.50
  -2   7  -2  156.08    6.80
   2   7   2  151.28    4.70
  -2   7  -2  156.18    4.70
  -3  -7  -2  511.95   14.50
  -3  -7  -2  510.95   16.30
  -3  -7  -2  497.45   14.70
   3  -7   2  527.55   13.80
  -3  -7  -2  501.35   14.20
   3  -7   2  523.35   15.70
   3  -7   2  510.05   15.00
   3  -7   2  514.35   14.20
   3   7   2  524.65   14.30
   3   7   2  492.95   14.10
  -3   7  -2  522.85   16.30
  -3   7  -2  513.65   16.00
  -3   7  -2  503.35   13.90
   3   7   2  489.05   14.30
   3   7   2  526.15   15.60
  -3   7  -2  514.15   15.10
   3   7   2  503.85   17.10
   4  -7   2   41.50    3.10
  -4  -7  -2   49.00    3.10
  -4  -7  -2   47.10    2.90
  -4  -7  -2   46.30    4.50
   4  -7   2   46.10    4.00
  -4  -7  -2   47.60    2.90
   4  -7   2   48.10    2.70
  -4   7  -2   44.50    3.60
  -4   7  -2   50.69    2.50
  -4   7  -2   47.60    4.30
   4   7   2   49.40    2.90
  -4   7  -2   43.30    4.40
  -4   7  -2   41.10    2.70
   4   7   2   50.09    3.80
   4   7   2   44.80    5.50
  -5  -7  -2    5.40    1.80
  -5  -7  -2    4.40    1.60
   5  -7   2    4.00    1.80
  -5  -7  -2    3.60    1.50
   5  -7   2    4.30    2.40
   5  -7   2    1.60    1.50
   5  -7   2    3.70    1.50
  -5   7  -2    3.00    2.70
   5   7   2    3.30    3.20
  -5   7  -2    4.10    1.50
   5   7   2    4.40    2.40
  -5   7  -2    5.70    2.50
   5   7   2    4.70    1.70
  -5   7  -2    1.70    1.40
   5   7   2    2.00    1.90
  -5   7  -2    4.50    2.00
   6  -7   2    2.30    1.60
   6  -7   2   -1.70    1.70
  -6  -7  -2    5.20    1.80
   6  -7   2   -0.60    2.30
  -6  -7  -2    1.00    1.60
  -6  -7  -2    2.40    1.60
   6  -7   2    4.10    1.80
   6   7   2    0.40    1.80
  -6   7  -2    1.70    1.70
  -6   7  -2    3.00    2.30
   6   7   2   -2.20    2.40
   6   7   2    2.90    3.50
  -6   7  -2    1.70    2.60
  -6   7  -2    0.20    1.60
   7  -7   2  430.66   13.30
  -7  -7  -2  438.56   13.00
   7  -7   2  426.06   12.40
   7  -7   2  435.46   13.20
  -7  -7  -2  440.96   13.20
   7  -7   2  445.16   14.30
  -7   7  -2  437.36   13.30
  -7   7  -2  418.86   13.00
   7   7   2  442.76   19.40
  -7   7  -2  422.76   13.90
  -7   7  -2  370.06   15.90
   7   7   2  433.06   13.10
  -8  -7  -2    2.10    2.10
   8  -7   2    1.20    2.40
   8  -7   2    4.10    2.60
  -8  -7  -2    6.10    2.20
   8  -7   2    8.60    2.50
   8  -7   2    7.50    3.20
  -8  -7  -2    3.20    2.40
   8   7   2    7.60    3.30
   8   7   2    2.20    3.90
  -8   7  -2    7.90    2.50
  -8   7  -2    5.10    2.30
  -8   7  -2    5.90    3.00
   8   7   2    8.80    2.10
  -8   7  -2   15.60    3.30
   9  -7   2  122.29    7.40
  -9  -7  -2  134.89    6.30
  -9  -7  -2  125.09    6.30
  -9   7  -2  141.59    7.90
  -9   7  -2  115.99    6.20
   9   7   2  127.19    9.30
   9   7   2  132.29    7.70
   9   7   2  123.29    5.10
 -10  -7  -2   92.29    5.90
 -10  -7  -2   91.29    6.00
  10  -7   2   92.79    7.10
  10   7   2   97.99    9.00
 -10   7  -2   97.29    6.20
  10   7   2  107.09    7.40
 -10   7  -2   90.29    7.20
 -11  -7  -2   10.70    3.20
 -11  -7  -2   15.60    3.40
  11  -7   2    8.70    4.20
  11   7   2    8.30    5.60
 -11   7  -2   15.30    4.50
  11   7   2   12.40    4.10
 -11   7  -2    8.80    3.90
 -12  -7  -2    3.00    3.20
  12  -7   2   -2.60    8.10
 -12  -7  -2    0.40    3.10
  12   7   2   14.30    4.50
  12   7   2    8.00    6.20
 -12   7  -2    0.90    4.40
 -13  -7  -2    5.00    3.70
  13  -7   2    2.30    4.80
 -13  -7  -2   -0.60    3.30
  13   7   2    9.50    5.20
  13   7   2    5.50    7.10
 -13   7  -2   -1.00    4.70
 -14  -8   2   -1.20    3.50
 -14  -8   2   -1.50    3.60
  14  -8  -2    4.10    6.60
  14   8  -2   -6.60    6.60
 -14   8   2   -0.80    5.40
  14   8  -2    1.10    5.10
 -13  -8   2   27.10    4.00
  13  -8  -2   31.80    6.90
 -13  -8   2   29.50    4.10
 -13   8   2   30.60    5.50
  13   8  -2   44.50    8.00
  13   8  -2   27.20    5.50
 -12  -8   2    2.30    2.60
  12  -8  -2   -5.90    4.90
 -12  -8   2    4.10    2.90
 -12   8   2    1.70    3.90
  12   8  -2    9.30    5.80
  12   8  -2   -1.40    4.00
 -12   8   2   -3.80    4.20
 -11  -8   2   24.70    3.10
 -11  -8   2   22.60    3.20
  11  -8  -2   18.90    5.50
  11   8  -2   27.00    4.80
 -11   8   2   23.80    4.60
 -11   8   2   22.20    4.90
  11   8  -2   18.90    6.00
  10  -8  -2    1.40    4.30
 -10  -8   2    1.80    2.10
 -10  -8   2    1.90    2.20
 -10   8   2   10.00    4.10
  10   8  -2    9.60    3.90
  10   8  -2    8.20    4.60
 -10   8   2    7.10    3.90
 -10   8   2    7.60    3.00
   9  -8  -2   30.60    3.90
  -9  -8   2   33.70    3.30
   9  -8  -2   43.20    5.60
  -9  -8   2   39.30    3.50
  -9   8   2   39.50    5.10
  -9   8   2   28.60    4.60
   9   8  -2   35.20    4.90
   9   8  -2   36.10    5.50
  -9   8   2   35.00    4.20
  -8  -8   2   -1.40    1.40
   8  -8  -2   -0.50    2.50
   8  -8  -2    3.30    3.70
   8  -8  -2    5.20    2.90
  -8  -8   2   -0.40    1.50
   8  -8  -2   -2.80    2.80
  -8   8   2   -2.20    2.80
  -8   8   2    6.00    3.30
   8   8  -2   -0.90    3.10
  -8   8   2   -0.30    2.00
   7  -8  -2  142.19    8.10
   7  -8  -2  138.99    6.40
  -7  -8   2  132.19    6.40
  -7  -8   2  129.59    4.90
   7  -8  -2  124.59    6.60
  -7  -8   2  128.19    4.40
  -7  -8   2  128.59    4.40
   7  -8  -2  130.99    6.00
  -7   8   2  128.79    7.10
  -7   8   2  136.29    5.90
  -7   8   2  128.19    5.50
   7   8  -2  139.69    8.40
   7   8  -2  132.29    7.40
  -7   8   2  133.09    7.50
  -6  -8   2   92.89    3.60
  -6  -8   2   96.09    5.50
   6  -8  -2   89.29    5.60
   6  -8  -2   88.39    6.90
   6  -8  -2   95.39    5.00
   6  -8  -2   96.09    4.60
   6   8  -2   87.19    6.70
  -6   8   2   73.89    4.90
   6   8  -2   93.89    4.90
  -6   8   2   95.29    4.60
   6   8  -2   99.79    4.00
  -6   8   2   85.39    5.70
  -5  -8   2  365.06   12.90
   5  -8  -2  325.77   11.60
  -5  -8   2  334.97    9.20
  -5  -8   2  330.77   11.40
   5  -8  -2  328.67   10.10
   5  -8  -2  342.37   12.80
   5  -8  -2  328.67   10.50
   5   8  -2  331.27   12.20
  -5   8   2  321.17   12.10
   5   8  -2  350.46   13.10
   5   8  -2  339.97    9.50
  -5   8   2  337.57   10.30
  -5   8   2  341.77   11.80
  -5   8   2  331.27    9.90
   5   8  -2  332.37   11.10
  -4  -8   2    1.30    2.20
   4  -8  -2   -2.60    2.80
  -4  -8   2    0.50    2.20
  -4  -8   2    0.10    2.30
   4  -8  -2    1.30    1.10
   4  -8  -2   -1.70    1.40
   4   8  -2   -1.10    2.20
  -4   8   2    1.00    1.40
   4   8  -2   -3.20    2.80
  -4   8   2   -1.10    2.00
  -4   8   2    1.80    1.10
  -4   8   2   -2.60    2.50
   4   8  -2    1.80    2.10
  -4   8   2   -1.40    1.70
   3  -8  -2   44.90    2.70
  -3  -8   2   30.40    4.20
   3  -8  -2   37.40    4.30
  -3  -8   2   47.00    4.10
   3  -8  -2   44.30    5.10
  -3  -8   2   47.70    4.30
  -3   8   2   48.50    3.10
  -3   8   2   43.30    2.20
  -3   8   2   45.70    4.10
   3   8  -2   49.10    4.50
   3   8  -2   40.80    4.30
   3   8  -2   51.79    5.30
  -3   8   2   43.80    4.60
  -2  -8   2    2.60    2.20
   2  -8  -2    2.40    2.60
   2  -8  -2    2.00    2.20
  -2  -8   2   -0.70    2.70
  -2  -8   2   -0.90    2.50
   2   8  -2    3.20    3.10
   2   8  -2   -2.90    2.10
  -2   8   2    3.50    2.50
  -2   8   2    2.70    1.20
  -2   8   2    3.50    2.10
  -2   8   2    1.90    0.80
  -2   8   2    1.30    1.30
  -2   8   2    1.80    0.80
   2   8  -2    1.70    2.40
  -1  -8   2  792.72   23.10
   1  -8  -2  781.22   23.90
   1  -8  -2  784.42   22.80
   1   8  -2  806.62   23.50
   1   8  -2  804.82   23.60
  -1   8   2  805.22   21.30
   1   8  -2  785.92   24.30
  -1   8   2  789.02   22.80
  -1   8   2  793.12   24.80
   1   8  -2  789.32   23.40
  -1   8   2  782.22   21.30
  -1   8   2  806.42   23.60
   0  -8   2  129.69    6.10
   0  -8  -2  119.79    5.60
   0  -8   2  126.59    6.20
   0  -8  -2  122.79    7.00
   0   8   2  132.89    6.50
   0   8  -2  143.69    6.70
   0   8   2  124.59    4.40
   0   8   2  122.19    7.30
   0   8   2  126.29    4.30
   0   8   2  123.29    5.80
   0   8  -2  126.19    6.60
  -1  -8  -2   40.40    3.50
   1  -8   2   43.70    4.10
   1  -8   2   40.70    4.10
  -1  -8  -2   39.80    4.50
  -1   8  -2   46.50    4.50
   1   8   2   34.50    3.80
   1   8   2   41.10    4.10
   1   8   2   38.10    2.20
   1   8   2   33.70    4.50
  -1   8  -2   54.79    4.70
   1   8   2   31.80    2.50
  -2  -8  -2  327.57   10.90
   2  -8   2  336.37   11.30
  -2  -8  -2  341.07   12.40
  -2  -8  -2  330.17    9.90
   2  -8   2  352.46   11.80
  -2   8  -2  362.56    9.60
  -2   8  -2  361.76   12.20
   2   8   2  348.37   10.10
  -2   8  -2  354.06   12.40
   2   8   2  332.77    9.40
   2   8   2  356.46    9.60
   2   8   2  341.47   13.20
   2   8   2  342.17   11.80
   2   8   2  334.67    9.90
  -3  -8  -2  157.88    7.90
  -3  -8  -2  158.28    5.70
  -3  -8  -2  169.98    6.40
   3  -8   2  174.88    7.50
   3  -8   2  163.98    5.40
   3  -8   2  169.58    6.80
  -3   8  -2  181.68    7.90
  -3   8  -2  158.78    7.90
   3   8   2  166.78    7.20
   3   8   2  164.38    5.40
   3   8   2  167.18    9.00
   3   8   2  159.48    5.50
  -3   8  -2  162.48    5.30
  -4  -8  -2   73.39    4.10
  -4  -8  -2   77.39    5.80
  -4  -8  -2   75.29    3.40
  -4  -8  -2   76.59    3.80
   4  -8   2   79.69    5.50
   4  -8   2   70.59    4.60
   4  -8   2   77.59    3.60
   4  -8   2   78.29    3.00
   4   8   2   78.29    3.70
  -4   8  -2   77.49    4.70
  -4   8  -2   69.39    5.80
  -4   8  -2   76.59    3.10
   4   8   2   79.29    6.90
   4   8   2   76.59    4.90
  -4   8  -2   76.89    5.60
   4   8   2   70.89    3.70
   5  -8   2  180.38    8.00
  -5  -8  -2  182.18    6.30
   5  -8   2  185.98    6.10
   5  -8   2  176.58    6.40
  -5  -8  -2  172.48    8.50
  -5  -8  -2  179.98    6.50
   5  -8   2  186.88    7.00
  -5  -8  -2  178.58    6.70
  -5   8  -2  178.98    6.10
   5   8   2  186.28    7.40
  -5   8  -2  180.08    7.50
  -5   8  -2  154.88   11.80
  -5   8  -2  177.68    6.30
  -6  -8  -2  156.48    6.30
  -6  -8  -2  162.28    6.10
  -6  -8  -2  159.88    6.10
   6  -8   2  122.89    8.10
   6  -8   2  159.78    6.00
   6  -8   2  161.08    6.30
  -6   8  -2  154.98    5.90
  -6   8  -2  160.08    6.10
  -6   8  -2  160.48    8.00
   6   8   2  156.58    6.70
  -6   8  -2  149.39    6.90
   6   8   2  153.38    9.10
  -7  -8  -2   25.00    3.30
   7  -8   2   29.90    3.80
   7  -8   2   23.50    3.90
  -7  -8  -2   29.90    3.50
  -7  -8  -2   28.00    3.70
  -7   8  -2   20.50    3.40
   7   8   2   32.20    5.00
   7   8   2   26.20    3.10
  -7   8  -2   21.10    4.00
   7   8   2   23.30    5.30
  -7   8  -2   19.90    2.80
   8  -8   2  124.29    7.50
  -8  -8  -2  135.49    6.00
  -8  -8  -2  124.59    6.00
   8   8   2  127.19    9.60
   8   8   2  121.99    5.70
  -8   8  -2  128.79    7.90
  -8   8  -2  119.59    6.10
   8   8   2  125.39    8.10
  -9  -8  -2   62.09    5.00
   9  -8   2   70.39    6.60
  -9  -8  -2   65.39    5.00
   9   8   2   63.69    4.20
  -9   8  -2   68.49    6.80
   9   8   2   68.89    9.00
   9   8   2   56.19    7.00
 -10  -8  -2   38.50    4.80
 -10  -8  -2   29.30    3.90
  10  -8   2   23.90    4.80
  10   8   2   37.90    7.20
 -10   8  -2   35.40    5.70
  10   8   2   34.70    5.70
 -11  -8  -2   10.30    3.40
  11  -8   2   16.20    4.80
 -11  -8  -2   10.70    3.50
  11   8   2   19.00    6.70
 -11   8  -2   14.60    4.40
  11   8   2   12.00    4.80
  12  -8   2    3.80    4.80
 -12  -8  -2   -2.90    3.10
 -12  -8  -2    5.70    3.80
 -12   8  -2   -2.60    4.50
  12   8   2    0.80    5.00
  12   8   2   15.60    7.20
 -12  -9   2   -4.60    2.70
 -12  -9   2    2.90    3.10
  12  -9  -2   -3.90    5.80
  12   9  -2   -1.60    4.70
  12   9  -2    4.10    6.30
 -12   9   2    4.30    4.80
 -11  -9   2   24.20    3.40
  11  -9  -2   37.30    6.40
 -11  -9   2   35.50    4.20
  11   9  -2   30.30    7.10
 -11   9   2   28.80    5.20
 -11   9   2   34.00    6.30
  11   9  -2   23.70    5.20
 -10  -9   2   23.00    2.90
 -10  -9   2   22.90    2.80
  10  -9  -2   24.30    5.70
  10   9  -2   33.70    6.50
 -10   9   2   23.30    4.70
 -10   9   2   29.30    5.40
  10   9  -2   24.20    4.60
  -9  -9   2  101.59    4.30
  -9  -9   2  104.59    5.00
   9  -9  -2   95.99    8.90
   9   9  -2  103.99    9.20
  -9   9   2   95.59    8.00
   9   9  -2  103.79    7.90
  -9   9   2  108.39    7.80
  -8  -9   2   24.20    2.80
   8   9  -2   31.30    5.90
  -8   9   2   31.70    5.00
  -8   9   2   29.00    4.80
   8   9  -2   29.80    4.90
   7  -9  -2    4.80    2.40
   7  -9  -2    3.20    4.00
  -7  -9   2    1.60    1.30
   7   9  -2   -5.60    3.70
   7   9  -2    6.30    3.50
  -7   9   2    2.60    3.10
  -7   9   2    4.60    3.60
  -6  -9   2   41.10    5.30
   6  -9  -2   41.60    3.30
   6  -9  -2   44.40    4.00
   6  -9  -2   62.49    6.80
   6   9  -2   53.49    5.60
  -6   9   2   48.30    5.20
  -6   9   2   51.59    5.60
   6   9  -2   53.09    6.40
   6   9  -2   38.00    3.00
   5  -9  -2   79.79    4.30
  -5  -9   2  100.59    6.30
   5  -9  -2   95.69    7.50
  -5   9   2   83.39    3.70
   5   9  -2   99.69    6.70
  -5   9   2   88.39    4.40
   5   9  -2   88.99    5.50
   5   9  -2   86.89    7.30
  -5   9   2   89.09    6.70
  -5   9   2   95.39    5.90
   4  -9  -2   68.99    3.60
  -4  -9   2   79.79    5.80
   4  -9  -2   73.19    6.70
   4   9  -2   65.19    5.10
   4   9  -2   72.39    6.30
  -4   9   2   68.69    5.80
  -4   9   2   59.99    5.10
  -4   9   2   68.69    2.90
   4   9  -2   69.89    5.80
  -3  -9   2   -1.80    2.50
   3  -9  -2   -4.10    3.10
  -3   9   2    2.50    1.70
  -3   9   2    2.70    2.40
  -3   9   2    2.10    2.90
   3   9  -2   -0.50    2.70
   3   9  -2    2.00    3.50
   3   9  -2    0.80    2.60
  -3   9   2   -0.30    1.30
  -2  -9   2  181.18    8.10
   2  -9  -2  169.48    8.70
   2   9  -2  166.38    9.10
   2   9  -2  180.28    8.40
  -2   9   2  165.98    5.60
  -2   9   2  172.38    7.50
  -2   9   2  170.28    5.50
   2   9  -2  190.58    8.00
  -2   9   2  178.08   11.40
  -1  -9   2   89.59    5.90
   1  -9  -2   97.69    6.20
   1  -9  -2   87.19    6.50
   1   9  -2  102.39    6.10
   1   9  -2  107.79    7.10
  -1   9   2   97.89    5.60
  -1   9   2   93.59    6.00
  -1   9   2   88.39    3.40
   1   9  -2   91.69    6.20
  -1   9   2   92.09    3.50
   0  -9  -2  271.37   10.80
   0  -9   2  280.07   10.20
   0  -9  -2  248.98    9.50
   0   9   2  261.87    9.70
   0   9   2  274.37   10.50
   0   9  -2  268.27   10.50
   0   9  -2  266.07   10.50
   0   9   2  267.27    7.60
   0   9   2  262.27    7.60
   0   9   2  205.88   16.00
   1  -9   2  204.98    8.60
  -1  -9  -2  207.58    9.30
  -1  -9  -2  190.98    7.70
  -1   9  -2  205.58    9.20
   1   9   2  196.18    8.50
   1   9   2  194.38    6.00
   1   9   2  184.38   10.30
   1   9   2  196.38    6.10
  -1   9  -2  198.78    8.70
  -2  -9  -2   45.40    4.20
  -2  -9  -2   38.90    5.40
   2   9   2   40.90    4.80
   2   9   2   45.70    6.00
   2   9   2   43.00    2.50
   2   9   2   41.70    2.90
  -3  -9  -2  104.79    4.20
   3  -9   2  115.09    6.80
  -3  -9  -2  105.39    5.60
   3  -9   2  108.29    7.20
  -3  -9  -2  111.39    9.10
   3   9   2   99.79    4.20
  -3   9  -2  103.59    8.70
  -3   9  -2  106.09    4.10
   3   9   2  108.29    6.30
   3   9   2  107.39    4.60
  -3   9  -2  107.39    4.00
   3   9   2  103.19    7.80
  -3   9  -2  129.29    7.20
   4  -9   2   22.50    3.90
  -4  -9  -2   14.90    3.80
  -4  -9  -2   10.70    2.70
   4  -9   2   15.50    3.30
   4  -9   2   13.00    2.00
  -4   9  -2   23.50    4.20
   4   9   2   12.20    4.50
  -4   9  -2   14.70    3.80
   4   9   2   14.10    1.70
   4   9   2   21.30    3.50
  -5  -9  -2   50.39    3.50
  -5  -9  -2   50.79    2.80
  -5  -9  -2   52.59    5.90
   5  -9   2   51.49    3.50
  -5  -9  -2   42.30    4.80
   5  -9   2   58.59    4.90
   5  -9   2   45.90    5.60
  -5   9  -2   58.79    5.90
   5   9   2   59.89    5.00
   5   9   2   64.99    7.60
  -6  -9  -2   62.59    6.70
   6  -9   2   80.29    4.40
  -6  -9  -2   82.89    4.40
   6  -9   2   70.49    6.50
  -6  -9  -2   71.89    4.00
   6   9   2   80.39    5.40
   6   9   2   67.99    7.90
  -6   9  -2   73.49    6.80
  -7  -9  -2   71.29    7.30
  -7  -9  -2   70.99    4.70
   7  -9   2   69.89    6.60
  -7  -9  -2   74.89    4.50
   7   9   2   70.39    8.60
  -7   9  -2   62.59    7.00
   7   9   2   84.39    5.30
   8  -9   2   11.30    4.00
  -8  -9  -2    5.40    2.40
   8   9   2    7.80    2.90
   8   9   2   11.60    5.80
  -8   9  -2    5.80    4.00
  -9  -9  -2    1.20    2.70
  -9  -9  -2    1.20    2.40
   9  -9   2   -0.20    4.00
  -9   9  -2   -1.70    3.90
   9   9   2    0.10    5.80
 -10  -9  -2   -2.00    3.10
 -10  -9  -2   -4.40    2.50
  10  -9   2   -5.60    4.20
  10   9   2    4.40    6.00
 -10   9  -2    3.60    4.10
 -11  -9  -2   -0.30    3.10
 -11  -9  -2    3.30    3.50
 -11   9  -2   -0.90    4.90
  11   9   2    4.60    6.70
  11 -10  -2   -4.40    5.70
 -11 -10   2    2.80    2.50
 -11  10   2    8.50    4.80
 -11  10   2   -3.40    5.20
  11  10  -2    6.00    6.80
  11  10  -2    4.30    5.00
  10 -10  -2    5.00    6.30
 -10 -10   2    9.00    2.40
  10  10  -2   -2.80    4.10
 -10  10   2   11.90    4.60
 -10  10   2   -2.80    4.70
  10  10  -2    7.70    6.00
   9 -10  -2   -0.40    5.30
  -9 -10   2    1.80    1.90
   9  10  -2    6.40    5.80
  -9  10   2    2.30    4.40
   9  10  -2   -0.30    4.20
  -9  10   2    5.80    4.20
  -8 -10   2  100.09    4.30
   8 -10  -2   99.89    9.10
  -8  10   2   98.69    8.30
  -8  10   2  112.69    8.30
   8  10  -2  112.69    8.40
   8  10  -2  103.19    9.70
  -7 -10   2    7.70    4.10
   7 -10  -2   -0.30    4.60
  -7  10   2    2.80    3.80
   7  10  -2   11.40    5.50
  -7  10   2   14.60    4.40
   7  10  -2    2.60    3.90
   6 -10  -2    1.60    4.30
   6 -10  -2    3.60    2.20
  -6 -10   2    1.70    3.60
   6  10  -2    9.00    3.90
  -6  10   2    3.20    3.40
  -6  10   2   -1.00    3.30
   6  10  -2    1.10    4.30
   5 -10  -2   25.20    3.10
   5 -10  -2   18.80    6.00
  -5 -10   2   37.80    5.00
   5  10  -2   33.80    5.30
  -5  10   2   28.30    4.10
  -5  10   2   26.30    4.90
   5  10  -2   30.30    5.50
  -4 -10   2   46.50    5.90
  -4  10   2   44.90    6.00
   4  10  -2   41.50    5.20
  -4  10   2   35.30    5.00
   4  10  -2   49.60    6.50
   4  10  -2   47.50    5.90
  -3 -10   2    2.80    3.30
   3 -10  -2    0.80    4.40
  -3  10   2    0.50    3.10
   3  10  -2   -1.10    2.90
   3  10  -2    1.80    3.80
  -3  10   2    1.90    2.70
   2 -10  -2   24.00    5.60
  -2 -10   2   20.90    4.00
  -2  10   2   22.40    3.70
   2  10  -2   28.20    5.10
   2  10  -2   15.30    4.40
  -2  10   2   26.30    4.20
  -1 -10   2   12.50    3.50
  -1  10   2   16.50    3.70
  -1  10   2   12.20    3.30
   1  10  -2    7.90    3.40
   0 -10   2   22.50    3.90
   0 -10  -2   14.50    3.90
   0  10  -2   12.00    3.60
   0  10   2   16.70    3.50
   0  10  -2   12.60    3.70
   0  10   2   13.50    4.70
   0  10   2   24.00    4.00
   1 -10   2   65.19    6.10
  -1 -10  -2   54.19    6.50
  -1  10  -2   54.19    5.70
   1  10   2   57.79    5.60
  -1  10  -2   61.69    6.20
   1  10   2   50.69    7.20
   2 -10   2   66.89    6.40
  -2 -10  -2   75.89    9.80
  -2  10  -2   49.30    5.60
   2  10   2   47.40    5.20
   2  10   2   54.59    7.00
  -2  10  -2   52.59    6.40
   3 -10   2   60.89    6.50
  -3 -10  -2   51.09    6.90
  -3  10  -2   61.79    6.50
  -3  10  -2   54.89    6.10
   3  10   2   61.79    7.50
   4 -10   2  138.99    8.30
  -4 -10  -2  155.88    9.50
  -4 -10  -2  136.29    5.10
   4  10   2  139.09    9.90
  -4  10  -2  158.88    8.70
   4  10   2  146.69    7.50
  -5 -10  -2   17.10    4.70
  -5 -10  -2   10.50    2.00
   5 -10   2    9.30    2.00
   5 -10   2    8.10    3.90
  -5  10  -2   11.10    4.10
   5  10   2    3.60    5.40
   5  10   2    5.90    3.20
   6 -10   2    0.30    2.80
  -6 -10  -2   -6.20    3.90
  -6 -10  -2    2.50    2.10
   6 -10   2   -1.50    3.70
   6  10   2    1.00    3.00
  -6  10  -2    1.30    3.80
   6  10   2    8.00    5.50
  -7 -10  -2    5.10    2.30
   7 -10   2    6.10    4.30
  -7 -10  -2    8.50    4.50
   7  10   2   10.20    5.60
  -7  10  -2    1.00    4.00
   7  10   2    1.80    3.20
  -8 -10  -2    1.90    4.50
  -8 -10  -2    2.20    2.50
  -8 -10  -2    1.20    2.40
   8 -10   2    1.20    4.40
  -8  10  -2    4.10    4.50
   8  10   2    5.10    6.20
  -9 -10  -2    6.10    4.90
  -9 -10  -2    4.90    3.00
  -9 -10  -2    3.40    2.80
  -9  10  -2    9.80    4.80
   9  10   2    4.90    6.60
  10  10   2   11.70    7.50
  -9 -11   2   -4.80    5.20
   9 -11  -2    8.40    6.50
   9  11  -2   21.30    7.40
   9  11  -2   -2.30    5.40
  -9  11   2    5.60    4.80
  -9  11   2    7.90    5.70
  -8 -11   2    8.00    5.00
   8 -11  -2  -12.30    5.70
   8  11  -2    1.80    5.00
   8  11  -2    5.30    5.90
  -8  11   2   -3.40    4.30
  -8  11   2    3.30    4.90
  -7 -11   2   -3.50    4.50
   7 -11  -2    8.00    5.70
   7  11  -2    2.60    4.60
  -7  11   2   -1.50    4.20
  -7  11   2    0.20    4.50
   7  11  -2    9.90    5.90
   6 -11  -2   10.20    5.50
  -6 -11   2    5.60    4.60
  -6  11   2    7.90    4.80
   6  11  -2   15.70    5.60
   6  11  -2    2.50    4.70
  -6  11   2    3.20    3.90
   5 -11  -2   10.50    5.60
  -5 -11   2    4.70    4.50
  -5  11   2    3.40    4.20
   5  11  -2    6.20    5.40
  -5  11   2    5.00    4.20
   4 -11  -2    6.70    5.10
  -4 -11   2    7.50    4.60
  -4  11   2   10.00    4.00
  -4  11   2    7.70    3.70
   4  11  -2   17.70    5.70
   3 -11  -2  124.49    9.60
  -3 -11   2  101.79    7.90
   3  11  -2  110.09    9.70
  -3  11   2  108.79    8.10
  -3  11   2  103.89    7.60
   2 -11  -2    3.20    4.70
  -2 -11   2   -1.50    6.70
  -2  11   2   -3.60    3.60
   2  11  -2    3.80    3.80
  -2  11   2    6.20    3.50
   1 -11  -2    1.10    4.30
  -1 -11   2    5.30    3.80
  -1  11   2    3.00    3.80
   1  11  -2    2.40    3.90
  -1  11   2    5.90    4.20
   0 -11  -2   80.09    8.00
   0 -11   2   89.59    7.70
   0  11   2   73.39    7.00
   0  11   2  100.49    7.50
   0  11  -2   92.29    7.80
   0  11   2   87.99    8.80
   0  11  -2   94.79    7.80
   1 -11   2   67.09    7.30
  -1 -11  -2   51.49    7.20
  -1  11  -2   63.79    7.30
   1  11   2   59.49    7.60
  -1  11  -2   52.59    6.90
   1  11   2   52.99    6.60
   2 -11   2   43.30    5.60
  -2 -11  -2   41.50    6.30
   2  11   2   43.70    6.70
  -2  11  -2   34.10    5.40
   2  11   2   47.40    6.30
  -3 -11  -2    5.20    4.90
   3 -11   2   -1.60    4.30
   3  11   2    1.90    3.80
   3  11   2   16.20    5.80
  -3  11  -2   -2.90    4.10
  -4 -11  -2    2.20    4.90
   4 -11   2    0.20    4.20
  -4  11  -2    5.40    4.40
   4  11   2    3.30    3.60
   4  11   2   -0.40    4.80
  -5 -11  -2    3.60    4.90
   5 -11   2   -5.10    4.20
   5  11   2   -3.40    3.50
   5  11   2    2.30    5.60
  -5  11  -2    7.80    4.40
  -6 -11  -2   34.30    6.10
  -6 -11  -2   30.90    3.40
  -6  11  -2   26.20    5.40
   6  11   2   31.50    4.90
   6  11   2   32.20    7.60
  -7 -11  -2    9.00    5.20
  -7 -11  -2   -2.20    2.30
  -7  11  -2   -5.40    4.60
   7  11   2    1.20    6.60
  -6 -12   2   -1.10    5.70
   6 -12  -2    0.60    6.40
   6  12  -2   13.80    6.50
  -6  12   2   -1.80    4.80
  -6  12   2   -7.10    5.00
   5 -12  -2   -4.40    6.40
  -5 -12   2    1.90    5.70
  -5  12   2   -2.10    4.90
   5  12  -2   10.60    6.20
  -5  12   2   -2.80    4.70
  -4 -12   2   13.80    5.50
   4 -12  -2   -4.00    6.20
   4  12  -2    3.80    6.00
  -4  12   2    9.00    5.10
  -4  12   2   -0.10    4.80
   3 -12  -2   10.80    6.40
  -3 -12   2   -3.70    4.70
  -3  12   2    6.40    4.50
   3  12  -2    4.70    5.90
  -3  12   2    2.20    4.60
   2 -12  -2    0.30    5.90
  -2 -12   2    7.60    4.70
  -2  12   2    5.00    4.70
  -2  12   2    2.00    4.30
   1 -12  -2    3.90    5.50
  -1 -12   2   -0.70    4.40
  -1  12   2   -4.80    4.30
  -1  12   2    1.20    4.30
   0 -12  -2   -5.00    4.90
   0 -12   2   -9.70    4.50
   0  12   2   -0.90    4.10
   0  12  -2   -8.30    4.70
  -1 -12  -2   25.80    6.00
   1 -12   2   22.60    5.80
  -1  12  -2   37.70    6.10
   1  12   2   29.40    7.10
   1  12   2   23.60    5.10
   2 -12   2    9.20    5.40
  -2 -12  -2   10.50    5.30
  -2  12  -2   19.90    5.30
   2  12   2    5.40    6.00
   2  12   2    7.60    4.50
  -3 -12  -2    8.90    5.90
  -3  12  -2   -2.00    5.20
   3  12   2   -4.10    5.60
   3  12   2    0.00    4.30
  -4 -12  -2   14.80    6.30
   4  12   2   -0.50    5.60
  -4  12  -2   14.50    5.40
   4  12   2   17.50    5.10
 -18   0   3   -3.30    4.60
 -18   0   3   -0.50    5.10
 -17   0   3   14.40    4.60
 -17   0   3   20.60    4.60
  17   0  -3    8.70    7.20
  16   0  -3    6.40    3.50
 -16   0   3   -5.10    3.20
 -16   0   3   -1.70    3.60
 -15   0   3   19.60    4.00
 -15   0   3   12.40    3.40
  15   0  -3   17.20    3.50
 -14   0   3   -0.20    2.40
 -14   0   3   -1.50    2.50
  14   0  -3   -1.00    2.40
 -13   0   3   10.00    2.80
  13   0  -3   19.90    2.90
 -13   0   3   13.50    3.00
 -12   0   3   -1.70    2.10
  12   0  -3   -5.00    2.50
  12   0  -3   -4.80    2.20
  12   0  -3   -1.10    2.00
 -12   0   3   -2.80    2.20
  11   0  -3  145.29    6.30
 -11   0   3  155.98    6.70
 -11   0   3  154.78    6.60
  11   0  -3  146.69    7.60
  11   0  -3  151.18    6.70
  10   0  -3   -1.50    1.70
 -10   0   3    1.70    2.10
 -10   0   3   -2.80    1.60
 -10   0   3   -1.30    1.50
  10   0  -3   -0.70    1.60
  10   0  -3    1.30    2.00
  10   0  -3    1.50    1.70
  -9   0   3  119.29    3.90
   9   0  -3  119.79    5.90
   9   0  -3  108.09    4.90
   9   0  -3  121.39    5.20
  -9   0   3  119.89    5.10
  -9   0   3  111.99    5.80
  -9   0   3  122.39    5.10
   9   0  -3  126.49    5.20
  -8   0   3    2.10    1.20
   8   0  -3   -0.20    1.70
   8   0  -3    0.80    1.40
   8   0  -3    0.80    1.30
   8   0  -3    1.50    1.30
  -8   0   3    0.90    1.50
  -7   0   3   15.00    1.80
  -7   0   3   18.90    2.40
  -7   0   3   12.40    1.60
   7   0  -3    8.80    1.50
   7   0  -3   13.00    2.10
   7   0  -3   13.80    1.90
   7   0  -3   17.00    1.90
  -7   0   3   11.40    1.20
   6   0  -3    2.50    1.10
  -6   0   3    1.70    1.30
  -6   0   3    0.60    0.90
   6   0  -3    0.40    1.40
  -6   0   3    0.00    0.90
  -6   0   3    1.50    0.70
   6   0  -3    1.00    0.90
  -5   0   3   91.19    3.60
  -5   0   3   94.79    4.00
   5   0  -3  101.29    3.70
   5   0  -3   90.99    4.00
  -5   0   3   92.89    3.20
   5   0  -3   93.69    3.60
  -5   0   3   91.99    3.50
   4   0  -3    0.80    0.70
  -4   0   3   -0.20    0.60
  -4   0   3    1.80    0.80
   4   0  -3    0.90    0.90
  -4   0   3   -0.20    0.60
  -4   0   3    0.00    0.80
   4   0  -3   -0.70    0.60
   3   0  -3 1909.71   50.99
  -3   0   3 1944.51   51.19
  -3   0   3 1958.40   50.99
   3   0  -3 1953.60   51.19
   3   0  -3 1929.51   50.99
  -3   0   3 1976.50   50.99
  -3   0   3 1982.70   51.09
   2   0  -3   -0.20    0.50
  -2   0   3   -0.30    0.60
  -2   0   3    1.40    0.60
   2   0  -3    0.20    0.60
  -2   0   3   -0.70    0.50
   2   0  -3   -0.40    0.50
   2   0  -3    0.50    0.60
   2   0  -3    1.00    0.60
  -2   0   3    0.40    0.50
   0   0  -3    1.10    0.40
   0   0   3   -0.20    0.50
   0   0   3    0.40    0.40
   0   0   3    0.00    0.40
   0   0  -3    0.30    0.50
   0   0  -3   -0.20    0.40
   0   0  -3    1.00    0.40
  -2   0  -3    6.80    1.00
   2   0   3    5.10    0.90
  -2   0  -3    5.20    0.70
  -2   0  -3    5.70    1.00
   2   0   3    6.10    0.90
   2   0   3    5.80    0.90
  -2   0  -3    4.40    0.80
  -4   0  -3    1.70    1.00
  -4   0  -3    0.00    1.00
  -4   0  -3   -0.40    0.70
   4   0   3    0.10    0.80
   4   0   3    4.10    1.00
  -4   0  -3    2.00    1.00
  -5   0  -3 1911.91   50.99
  -5   0  -3 1921.81   51.19
   5   0   3 1875.21   50.49
   5   0   3 1990.00   51.29
  -5   0  -3 1933.71   51.29
   5   0   3 1996.40   51.29
  -5   0  -3 1895.91   50.49
  -5   0  -3 1937.71   51.49
   6   0   3    7.10    1.60
  -6   0  -3    8.10    1.70
   6   0   3    5.00    1.60
  -6   0  -3    4.90    1.20
   6   0   3    3.80    1.10
  -6   0  -3    5.10    1.90
  -6   0  -3    9.60    1.80
  -6   0  -3    4.20    1.50
   7   0   3  631.54   18.10
  -7   0  -3  606.64   18.40
  -7   0  -3  651.93   18.20
   7   0   3  589.34   17.30
  -7   0  -3  629.74   18.20
  -7   0  -3  622.04   17.90
   7   0   3  622.94   18.10
  -7   0  -3  621.74   17.20
   8   0   3    8.10    1.90
  -8   0  -3   10.50    2.10
  -8   0  -3   11.30    2.60
  -8   0  -3   14.10    2.50
   8   0   3   12.10    2.40
   8   0   3   11.60    1.90
   8   0   3    7.40    1.50
  -8   0  -3    8.70    2.00
  -9   0  -3 2363.06   60.39
   9   0   3 2260.67   60.19
   9   0   3 2224.08   58.89
   9   0   3 2188.58   59.29
  -9   0  -3 2146.89   60.69
   9   0   3 2152.68   60.29
  -9   0  -3 2359.86   60.49
  -9   0  -3 2222.88   59.99
 -10   0  -3    0.70    2.10
 -10   0  -3    0.70    2.40
  10   0   3   -2.80    2.40
  10   0   3    3.20    1.90
 -10   0  -3   -0.80    1.90
  10   0   3   -0.60    1.50
 -11   0  -3   30.90    4.20
 -11   0  -3   31.60    3.70
  11   0   3   30.80    3.00
 -11   0  -3   28.30    3.90
  11   0   3   29.70    3.30
 -12   0  -3   -0.30    2.70
  12   0   3   -4.30    2.10
  12   0   3   -0.10    1.80
 -12   0  -3   -0.70    2.80
 -12   0  -3   -4.50    2.30
 -13   0  -3    2.20    3.10
 -13   0  -3    1.20    4.90
  13   0   3    2.90    2.20
 -13   0  -3    3.40    3.40
 -14   0  -3    0.80    4.50
 -14   0  -3    7.10    3.60
 -14   0  -3    8.00    3.80
 -15   0  -3   11.20    4.20
 -15   0  -3   11.20    4.90
 -15   0  -3    5.60    4.40
 -16   0  -3    3.30    5.30
 -16   0  -3   -1.00    4.80
 -16   0  -3   -0.70    4.60
 -18  -1   3    3.70    4.90
 -18  -1   3   -1.40    4.60
  18   1  -3    2.10    4.00
 -18   1   3    3.80    5.20
 -18   1   3   -1.90    4.50
  17  -1  -3   42.10    4.90
 -17  -1   3   27.00    4.90
 -17  -1   3   31.00    5.20
 -17   1   3   30.10    5.30
  17   1  -3   30.30    4.70
 -17   1   3   28.40    5.20
 -16  -1   3    4.90    3.70
 -16  -1   3    0.70    3.40
  16  -1  -3    4.40    3.10
 -16   1   3    3.20    5.60
  16   1  -3   14.40    6.80
 -16   1   3   -1.90    3.70
  15  -1  -3   -3.50    2.50
 -15  -1   3    2.60    2.60
 -15  -1   3    2.50    3.20
 -15   1   3    0.00    3.00
  15   1  -3    2.40    3.10
 -15   1   3   -3.90    3.00
 -14  -1   3   -1.40    2.30
 -14  -1   3    3.20    2.70
  14  -1  -3   -3.80    3.10
  14  -1  -3    0.20    2.40
 -14   1   3   -1.10    2.70
  14   1  -3    2.60    2.60
 -14   1   3    0.10    2.60
  13  -1  -3    2.60    2.90
  13  -1  -3    5.20    2.30
 -13  -1   3    7.70    4.10
 -13  -1   3    5.40    2.50
  13  -1  -3   10.30    2.70
  13  -1  -3    1.80    3.40
 -13   1   3    5.20    2.60
 -13   1   3    7.40    2.90
  13   1  -3    6.50    2.50
 -12  -1   3  225.08    8.90
  12  -1  -3  229.78    9.30
  12  -1  -3  228.28    7.90
 -12  -1   3  238.08    9.10
  12  -1  -3  239.08    8.70
  12  -1  -3  235.98   10.20
  12   1  -3  232.18    8.80
 -12   1   3  234.78    9.10
 -12   1   3  236.98    9.10
 -11  -1   3  136.99    6.20
  11  -1  -3  146.69    7.50
  11  -1  -3  142.49    6.50
  11  -1  -3  128.99    6.30
 -11  -1   3  140.69    6.30
  11  -1  -3  133.59    6.00
  11  -1  -3  140.29    5.50
  11   1  -3  139.49    6.30
 -11   1   3  134.69    6.30
 -11   1   3  145.59    6.40
  11   1  -3  132.39    6.10
  10  -1  -3   45.80    3.50
  10  -1  -3   47.20    2.90
  10  -1  -3   33.80    3.60
  10  -1  -3   39.80    4.40
 -10  -1   3   33.90    4.30
  10  -1  -3   47.70    3.60
 -10  -1   3   45.60    3.50
 -10  -1   3   37.10    3.30
 -10   1   3   41.70    3.40
  10   1  -3   40.60    3.50
  10   1  -3   37.00    4.10
 -10   1   3   40.20    3.50
 -10   1   3   42.40    2.60
  10   1  -3   42.90    3.40
 -10   1   3   34.50    4.30
  10   1  -3   45.10    3.50
   9  -1  -3    1.50    1.30
   9  -1  -3    1.90    1.70
  -9  -1   3    2.30    1.40
   9  -1  -3    1.90    1.50
   9  -1  -3    1.80    1.50
  -9  -1   3    1.60    1.40
   9  -1  -3    2.20    2.00
  -9  -1   3   -1.00    2.10
   9   1  -3    1.50    1.30
   9   1  -3    3.10    1.60
   9   1  -3    2.80    1.90
  -9   1   3    2.20    1.60
  -9   1   3    3.60    1.40
   9   1  -3    2.60    1.60
  -9   1   3    0.60    1.90
  -9   1   3    2.30    1.00
  -8  -1   3  146.39    5.50
   8  -1  -3  144.89    5.50
  -8  -1   3  142.09    6.40
   8  -1  -3  152.98    5.80
  -8  -1   3  146.39    5.50
   8  -1  -3  150.68    5.70
   8  -1  -3  146.29    6.40
  -8   1   3  149.59    5.60
  -8   1   3  146.79    5.60
   8   1  -3  162.48    5.70
   8   1  -3  154.18    5.60
   8   1  -3  140.29    6.20
   8   1  -3  145.89    5.70
  -8   1   3  138.89    6.20
  -8   1   3  147.89    5.10
  -7  -1   3  570.74   16.60
  -7  -1   3  571.44   17.30
   7  -1  -3  590.64   16.90
  -7  -1   3  581.24   16.60
   7  -1  -3  590.14   16.40
   7  -1  -3  629.24   16.90
   7  -1  -3  630.04   17.60
  -7   1   3  577.64   16.30
  -7   1   3  596.04   17.50
  -7   1   3  580.74   16.70
   7   1  -3  559.94   16.60
   7   1  -3  579.64   16.80
   7   1  -3  555.14   17.20
   7   1  -3  591.74   16.70
  -7   1   3  600.34   16.80
   6  -1  -3 1604.44   42.00
   6  -1  -3 1618.34   41.70
   6  -1  -3 1607.74   42.00
   6  -1  -3 1565.04   42.60
  -6  -1   3 1527.75   41.80
  -6  -1   3 1541.75   41.80
  -6  -1   3 1601.64   42.50
  -6   1   3 1564.24   42.50
   6   1  -3 1586.44   42.10
   6   1  -3 1564.24   41.80
   6   1  -3 1570.34   41.80
  -6   1   3 1559.44   41.50
  -6   1   3 1593.44   41.90
  -6   1   3 1560.64   41.90
   6   1  -3 1557.74   42.40
   5  -1  -3  631.04   20.40
  -5  -1   3  738.33   20.00
   5  -1  -3  742.13   20.00
   5  -1  -3  726.83   20.60
  -5  -1   3  755.42   20.50
  -5  -1   3  745.83   20.00
   5   1  -3  734.73   20.00
   5   1  -3  729.93   20.50
  -5   1   3  733.63   20.10
  -5   1   3  739.23   20.10
  -5   1   3  767.22   20.70
   5   1  -3  755.32   20.40
  -5   1   3  740.93   19.90
   5   1  -3  734.63   20.00
   4  -1  -3  329.97    9.60
   4  -1  -3  330.67    9.60
  -4  -1   3  307.27    9.70
   4  -1  -3  347.37   10.30
  -4  -1   3  340.77    9.80
  -4   1   3  340.07   10.00
  -4   1   3  333.57    9.60
   4   1  -3  331.27    9.40
   4   1  -3  329.87    9.80
  -4   1   3  324.67    9.50
   4   1  -3  332.57    9.40
   4   1  -3  305.97   10.20
  -4   1   3  327.77    9.50
  -3  -1   3 1565.74   41.00
   3  -1  -3 1596.94   41.20
   3  -1  -3 1567.94   41.50
  -3  -1   3 1554.74   41.00
   3  -1  -3 1582.34   41.20
  -3  -1   3 1568.24   41.00
  -3  -1   3 1559.94   41.20
   3   1  -3 1559.64   41.20
  -3   1   3 1563.04   41.20
   3   1  -3 1565.74   41.30
  -3   1   3 1533.75   41.10
  -3   1   3 1566.04   41.10
   3   1  -3 1579.34   41.00
  -3   1   3 1555.44   41.40
   3   1  -3 1563.94   41.00
  -3   1   3 1538.75   41.20
  -2  -1   3 1790.42   47.40
   2  -1  -3 1824.62   47.50
  -2  -1   3 1826.02   47.40
  -2  -1   3 1842.52   47.40
   2  -1  -3 1847.72   47.80
  -2  -1   3 1787.42   47.40
   2  -1  -3 1774.82   47.60
   2  -1  -3 1838.62   47.60
   2  -1  -3 1838.62   47.60
  -2  -1   3 1771.72   47.40
   2  -1  -3 1799.52   47.60
   2   1  -3 1819.82   47.40
  -2   1   3 1778.12   47.50
  -2   1   3 1850.81   47.60
  -2   1   3 1782.62   47.60
   2   1  -3 1824.32   47.40
  -2   1   3 1876.71   47.60
  -2   1   3 1779.12   47.70
   2   1  -3 1865.81   47.40
   2   1  -3 1833.92   47.40
   0  -1  -3 1380.76   36.00
   0  -1   3 1335.17   35.80
   0  -1  -3 1394.06   36.00
   0  -1  -3 1372.36   36.10
   0  -1   3 1402.86   35.80
   0  -1  -3 1330.47   36.00
   0  -1   3 1368.76   35.90
   0   1   3 1370.06   35.90
   0   1  -3 1360.86   35.90
   0   1  -3 1344.77   35.80
   0   1  -3 1365.16   35.90
   0   1   3 1401.46   36.00
   0   1   3 1370.96   36.10
   1  -1   3 1273.17   33.60
  -1  -1  -3 1256.87   33.70
  -1  -1  -3 1265.17   33.10
   1  -1   3 1261.47   33.60
   1  -1   3 1296.87   33.70
  -1  -1  -3 1303.47   33.80
   1   1   3 1275.37   33.70
  -1   1  -3 1299.97   33.70
   1   1   3 1265.07   33.70
  -1   1  -3 1299.37   33.60
   1   1   3 1289.57   34.00
  -1   1  -3 1249.68   33.60
  -2  -1  -3 1169.68   31.30
  -2  -1  -3 1190.68   30.70
   2  -1   3 1190.88   31.30
  -2  -1  -3 1193.48   31.10
   2  -1   3 1179.88   31.20
   2  -1   3 1196.38   31.20
  -2  -1  -3 1063.69   31.70
   2   1   3 1197.68   31.30
  -2   1  -3 1200.68   31.00
   2   1   3 1194.98   31.30
  -2   1  -3 1168.38   31.20
  -2   1  -3 1186.68   31.20
  -2   1  -3 1195.08   31.30
  -3  -1  -3 2027.70   51.79
  -3  -1  -3 2003.10   51.59
   3  -1   3 2035.40   51.99
   3  -1   3 2034.50   51.99
  -3  -1  -3 1963.50   52.09
   3  -1   3 1995.30   52.09
  -3  -1  -3 1921.61   51.99
   3   1   3 1999.10   51.99
  -3   1  -3 1993.90   51.99
  -3   1  -3 1977.60   51.99
  -3   1  -3 2027.20   51.89
  -3   1  -3 1771.32   52.19
  -4  -1  -3 1367.36   35.90
   4  -1   3 1390.56   36.30
  -4  -1  -3 1356.06   36.40
  -4  -1  -3 1357.26   36.40
  -4  -1  -3 1338.57   35.90
   4  -1   3 1354.36   36.30
  -4   1  -3 1361.56   36.30
  -4   1  -3 1356.76   36.30
  -4   1  -3 1344.17   36.30
   4   1   3 1365.86   36.30
   4   1   3 1368.36   36.00
  -4   1  -3 1374.16   36.30
   4   1   3 1355.46   36.30
   5  -1   3 2375.06   62.89
  -5  -1  -3 2429.96   63.09
  -5  -1  -3 2417.66   62.99
   5  -1   3 2412.66   62.99
  -5  -1  -3 2338.37   62.49
  -5   1  -3 2393.76   62.99
  -5   1  -3 2409.76   63.09
  -5   1  -3 2401.16   62.99
   5   1   3 2414.06   62.99
   5   1   3 2284.67   62.59
   5   1   3 2388.86   62.99
  -5   1  -3 2389.56   62.99
   6  -1   3 1261.27   34.40
   6  -1   3 1257.87   33.20
  -6  -1  -3 1288.37   34.50
  -6  -1  -3 1223.98   34.40
  -6  -1  -3 1265.47   34.90
  -6  -1  -3 1291.97   33.90
   6  -1   3 1300.67   34.50
  -6   1  -3 1291.77   34.50
  -6   1  -3 1295.47   34.50
  -6   1  -3 1298.97   34.70
   6   1   3 1240.58   34.40
  -6   1  -3 1254.87   34.40
   6   1   3 1245.18   34.40
   6   1   3 1249.57   33.90
   7  -1   3   64.89    3.60
   7  -1   3   70.59    3.90
  -7  -1  -3   66.59    3.30
  -7  -1  -3   64.19    4.40
  -7  -1  -3   68.19    3.90
   7  -1   3   67.19    2.60
   7  -1   3   75.19    3.90
  -7  -1  -3   69.59    3.90
  -7   1  -3   68.89    3.80
  -7   1  -3   67.69    3.80
  -7   1  -3   69.39    4.20
   7   1   3   65.39    3.80
   7   1   3   69.29    3.80
  -7   1  -3   66.29    3.90
   7   1   3   65.99    3.30
   8  -1   3  160.98    5.10
   8  -1   3  170.18    6.20
  -8  -1  -3  171.18    6.70
  -8  -1  -3  160.28    7.40
  -8  -1  -3  163.08    6.70
   8  -1   3  169.28    6.60
   8  -1   3  162.68    6.60
  -8  -1  -3  155.88    5.90
  -8   1  -3  164.58    7.10
  -8   1  -3  168.78    6.70
   8   1   3  155.78    6.50
  -8   1  -3  167.18    6.60
  -8   1  -3  160.48    6.60
   8   1   3  167.68    5.90
   8   1   3  165.68    6.60
  -9  -1  -3   75.79    6.60
  -9  -1  -3   84.19    4.40
   9  -1   3   92.59    4.50
   9  -1   3   90.69    3.40
   9  -1   3   81.19    5.00
  -9  -1  -3   92.39    5.20
  -9  -1  -3   86.29    5.10
   9  -1   3   86.79    5.10
   9   1   3   92.09    5.20
  -9   1  -3   84.59    5.00
   9   1   3   85.29    4.20
  -9   1  -3   88.39    5.60
  -9   1  -3   80.79    5.00
  -9   1  -3   81.49    5.00
  10  -1   3   15.80    2.90
 -10  -1  -3   21.00    3.30
 -10  -1  -3   20.00    2.80
  10  -1   3   24.20    2.90
 -10  -1  -3   18.20    2.90
 -10  -1  -3   15.40    2.90
  10   1   3   18.60    2.40
 -10   1  -3   24.20    3.40
 -10   1  -3   16.70    3.00
  10   1   3   19.40    3.40
 -10   1  -3   23.80    3.40
  10   1   3   17.30    2.50
  11  -1   3  219.08    7.10
 -11  -1  -3  232.78    9.30
 -11  -1  -3  228.08    9.30
 -11  -1  -3  214.18    8.80
  11  -1   3  220.48    9.20
  11  -1   3  201.48    8.00
 -11   1  -3  222.48    9.30
  11   1   3  228.58    8.00
  11   1   3  223.68    7.60
 -11   1  -3  225.78    9.20
 -11   1  -3  220.08    9.10
  12  -1   3   11.50    2.90
 -12  -1  -3   11.70    3.20
 -12  -1  -3    6.30    2.80
  12  -1   3    7.90    1.80
 -12  -1  -3    5.20    2.80
 -12   1  -3    7.00    3.00
 -12   1  -3    5.40    3.10
  12   1   3    9.50    2.40
 -12   1  -3    5.70    3.50
  13  -1   3    1.70    1.80
 -13  -1  -3    3.50    5.70
 -13  -1  -3   -0.80    3.20
 -13  -1  -3    4.40    2.90
 -13   1  -3    4.70    3.50
  13   1   3    5.00    2.60
 -13   1  -3    7.40    3.30
 -13   1  -3    4.60    3.20
 -14  -1  -3    9.40    3.60
 -14  -1  -3    4.40    3.90
 -14  -1  -3    5.40    4.00
 -14   1  -3   11.10    4.30
  14   1   3    7.60    3.00
 -14   1  -3    8.30    3.80
 -14   1  -3   14.10    4.40
 -15  -1  -3   -2.20    4.00
 -15  -1  -3    9.00    4.10
 -15  -1  -3   -2.10    4.70
 -15   1  -3   -3.70    4.00
 -15   1  -3   -0.60    4.00
 -15   1  -3   -0.90    4.70
 -16  -1  -3    7.70    5.00
 -16  -1  -3   15.80    4.60
 -16  -1  -3    3.10    5.40
 -16   1  -3    3.00    5.50
 -16   1  -3    5.70    5.10
 -16   1  -3   14.40    5.20
 -18  -2   3    3.90    4.60
 -18  -2   3   -6.70    5.00
 -18   2   3   -0.70    4.80
  18   2  -3   -3.20    4.20
 -18   2   3   -5.30    5.20
 -17  -2   3    1.50    3.80
 -17  -2   3    7.70    4.00
 -17   2   3    0.70    4.40
  17   2  -3    2.80    3.80
 -17   2   3    6.40    4.50
 -17   2   3    1.20    4.40
 -16  -2   3   50.59    5.90
 -16  -2   3   50.99    6.50
  16  -2  -3   40.20    6.30
  16  -2  -3   45.80    5.20
 -16   2   3   64.09    6.90
  16   2  -3   56.49    6.10
 -16   2   3   52.29    5.80
  15  -2  -3   16.10    3.30
 -15  -2   3   23.80    3.70
 -15  -2   3   15.70    3.70
  15  -2  -3   19.70    5.10
 -15   2   3   17.10    3.90
 -15   2   3   19.00    3.80
  14  -2  -3    2.60    2.50
 -14  -2   3    4.20    2.70
  14  -2  -3   -0.80    3.60
 -14  -2   3   -2.30    2.30
 -14   2   3   -1.80    2.80
 -14   2   3    5.70    2.80
  14   2  -3   -0.50    2.70
 -13  -2   3   46.10    4.60
  13  -2  -3   46.60    5.70
  13  -2  -3   47.90    4.30
  13  -2  -3   46.60    4.40
 -13  -2   3   45.80    4.50
  13  -2  -3   52.49    7.10
 -13   2   3   53.49    4.90
  13   2  -3   59.89    4.90
 -13   2   3   56.19    5.00
 -12  -2   3  103.89    5.60
  12  -2  -3  103.89    7.00
  12  -2  -3  104.39    5.50
 -12  -2   3  102.19    5.70
  12  -2  -3  105.59    5.30
  12  -2  -3   98.09    6.30
  12   2  -3  102.79    5.80
 -12   2   3  106.49    5.90
 -12   2   3  105.89    6.00
 -11  -2   3  307.47   10.50
  11  -2  -3  302.07   10.80
  11  -2  -3  301.97   10.10
  11  -2  -3  313.67   11.80
  11  -2  -3  307.37   10.30
  11  -2  -3  297.97   10.80
 -11  -2   3  296.47   10.50
 -11   2   3  296.17    9.70
 -11   2   3  310.67   10.70
  11   2  -3  310.47   10.70
 -11   2   3  311.67   10.80
  10  -2  -3  321.37   11.70
 -10  -2   3  307.17   10.40
  10  -2  -3  320.87   10.70
 -10  -2   3  322.57   10.50
  10  -2  -3  325.17   10.20
  10  -2  -3  328.37   10.80
  10   2  -3  303.87   10.50
 -10   2   3  318.67    9.90
 -10   2   3  292.77   11.40
 -10   2   3  315.17   10.60
 -10   2   3  314.97   10.50
  10   2  -3  291.27   10.30
  -9  -2   3  110.69    4.80
   9  -2  -3  113.49    6.00
   9  -2  -3  115.29    5.20
   9  -2  -3  111.59    4.80
   9  -2  -3  102.69    4.90
  -9  -2   3  109.99    5.90
  -9  -2   3  112.49    4.90
  -9   2   3  107.29    4.50
   9   2  -3  107.89    5.00
   9   2  -3  114.99    4.90
  -9   2   3  115.89    6.00
  -9   2   3  103.79    4.90
   9   2  -3  112.99    4.90
  -9   2   3  112.99    5.00
   8  -2  -3  534.65   15.40
  -8  -2   3  529.95   15.30
   8  -2  -3  535.15   16.40
   8  -2  -3  529.75   16.40
  -8  -2   3  546.25   15.40
   8  -2  -3  539.45   15.60
  -8   2   3  538.85   15.50
  -8   2   3  520.15   16.30
  -8   2   3  522.05   15.40
   8   2  -3  508.35   15.30
   8   2  -3  524.15   15.30
  -8   2   3  509.25   15.00
   8   2  -3  527.65   15.70
   7  -2  -3    0.10    1.20
   7  -2  -3    3.90    1.30
   7  -2  -3    1.50    1.20
  -7  -2   3   -0.80    1.60
  -7  -2   3    2.00    1.00
   7  -2  -3    2.90    1.60
  -7  -2   3    0.80    1.00
   7   2  -3   -0.20    0.90
   7   2  -3    4.40    1.20
  -7   2   3    0.50    1.50
  -7   2   3    1.90    1.00
   7   2  -3   -0.20    1.20
  -6  -2   3 1814.52   49.00
  -6  -2   3 1799.42   49.00
  -6  -2   3 1876.61   49.80
  -6  -2   3 1868.81   49.60
   6  -2  -3 1893.01   49.30
   6  -2  -3 1877.41   49.99
   6  -2  -3 1875.51   49.30
   6  -2  -3 1873.31   49.30
  -6   2   3 1854.51   49.20
  -6   2   3 1879.31   49.90
   6   2  -3 1846.42   49.00
  -6   2   3 1845.92   49.20
  -6   2   3 1847.12   49.10
   6   2  -3 1854.81   49.10
   6   2  -3 1841.42   49.50
   5  -2  -3  145.39    5.30
  -5  -2   3  146.39    5.40
  -5  -2   3  150.38    4.20
  -5  -2   3  142.99    4.80
   5  -2  -3  158.88    5.80
   5  -2  -3  148.09    5.10
   5  -2  -3  148.19    5.10
  -5  -2   3  142.79    4.80
  -5  -2   3  142.29    5.40
   5   2  -3  143.99    5.30
   5   2  -3  156.48    5.00
  -5   2   3  145.99    5.60
  -5   2   3  147.69    5.10
  -5   2   3  146.99    5.10
   5   2  -3  152.58    4.90
   4  -2  -3 1036.70   27.70
   4  -2  -3 1046.40   28.30
  -4  -2   3 1057.69   27.90
  -4  -2   3 1000.30   27.30
  -4  -2   3 1042.90   28.00
   4  -2  -3 1039.50   27.70
  -4  -2   3 1022.60   27.40
  -4   2   3 1005.60   27.60
   4   2  -3 1026.30   27.40
   4   2  -3 1013.00   27.40
  -4   2   3 1028.80   27.80
  -4   2   3 1062.19   28.30
  -4   2   3 1035.80   27.70
   4   2  -3 1044.20   27.90
   4   2  -3 1019.50   27.80
  -3  -2   3  223.48    6.40
   3  -2  -3  219.18    6.80
  -3  -2   3  258.47    6.90
   3  -2  -3  222.28    6.80
  -3  -2   3  223.08    6.50
  -3  -2   3  227.38    6.50
   3  -2  -3  230.58    7.10
   3  -2  -3  216.98    7.10
   3  -2  -3  209.58    7.20
  -3   2   3  225.98    6.80
  -3   2   3  223.28    6.70
  -3   2   3  210.88    7.50
  -3   2   3  226.28    6.80
   3   2  -3  220.28    6.70
   3   2  -3  223.28    7.00
   3   2  -3  211.78    6.80
  -3   2   3  217.18    6.80
   3   2  -3  224.18    6.50
   2  -2  -3 2449.05   64.49
   2  -2  -3 2463.45   64.49
   2  -2  -3 2443.96   64.89
  -2  -2   3 2500.65   64.59
   2  -2  -3 2449.25   64.49
   2  -2  -3 2517.15   64.49
  -2  -2   3 2438.06   64.69
   2  -2  -3 2456.25   64.79
  -2   2   3 2495.45   64.79
   2   2  -3 2512.65   64.59
  -2   2   3 2463.65   64.49
  -2   2   3 2549.04   64.49
  -2   2   3 2460.75   64.79
  -2   2   3 2441.66   64.79
  -2   2   3 2431.06   64.39
  -2   2   3 2478.95   64.49
   0  -2  -3 3576.54   93.49
   0  -2   3 3650.83   93.09
   0   2   3 3524.85   92.89
   0   2   3 3580.84   93.49
   1  -2   3 1799.12   46.30
   1  -2   3 1814.52   46.30
   1  -2   3 1793.32   45.90
  -1  -2  -3 1851.41   46.80
   1  -2   3 1817.82   46.70
  -1  -2  -3 1719.23   46.60
  -1  -2  -3 1810.02   47.20
  -1  -2  -3 1694.13   46.60
  -1   2  -3 1813.92   46.00
   1   2   3 1778.82   46.50
  -1   2  -3 1801.12   45.90
  -1   2  -3 1781.12   46.40
  -1   2  -3 1614.34   47.10
   1   2   3 1748.93   46.60
   2  -2   3  141.39    4.90
  -2  -2  -3  148.79    4.80
  -2  -2  -3  131.39    5.10
   2  -2   3  142.99    4.60
  -2  -2  -3  145.39    4.70
   2  -2   3  142.79    4.30
   2  -2   3  144.79    4.60
   2   2   3  142.59    4.70
  -2   2  -3  142.39    3.90
   2   2   3  140.69    5.50
  -2   2  -3  147.29    4.40
  -2   2  -3  137.09    4.60
  -2   2  -3  146.59    4.60
   2   2   3  147.69    4.70
  -2   2  -3  150.88    4.90
  -3  -2  -3   97.09    3.60
  -3  -2  -3   91.29    3.50
   3  -2   3   93.09    3.40
   3  -2   3   90.39    3.30
  -3  -2  -3   87.59    3.50
   3  -2   3   86.79    3.70
   3  -2   3   94.49    3.70
   3  -2   3   88.29    3.40
   3   2   3   90.79    4.40
  -3   2  -3   90.79    3.50
   3   2   3   91.29    3.50
  -3   2  -3   81.79    3.60
   3   2   3   96.49    3.50
  -3   2  -3   90.29    3.50
  -3   2  -3   83.79    3.30
  -4  -2  -3  132.69    4.70
   4  -2   3  138.29    5.00
   4  -2   3  128.09    4.60
   4  -2   3  128.49    4.90
  -4  -2  -3  125.09    4.70
   4  -2   3  132.99    4.70
  -4  -2  -3  129.89    4.80
   4  -2   3  130.19    4.70
   4   2   3  135.89    4.80
   4   2   3  137.79    5.90
  -4   2  -3  127.59    4.90
  -4   2  -3  132.09    4.70
   4   2   3  135.79    4.80
   4   2   3  133.09    4.70
  -4   2  -3  134.89    4.70
  -4   2  -3  129.89    5.20
  -5  -2  -3  140.09    5.30
  -5  -2  -3  146.59    5.10
   5  -2   3  151.38    5.30
  -5  -2  -3  138.99    5.30
   5  -2   3  147.89    5.20
   5  -2   3  147.49    5.40
   5  -2   3  142.59    5.20
  -5   2  -3  134.19    5.40
  -5   2  -3  143.79    5.30
   5   2   3  140.99    5.20
  -5   2  -3  138.49    5.20
  -5   2  -3  139.79    5.20
   5   2   3  139.99    5.20
   5   2   3  143.39    5.30
  -6  -2  -3   53.99    3.00
   6  -2   3   48.90    3.10
   6  -2   3   49.70    3.10
  -6  -2  -3   49.00    3.10
  -6  -2  -3   51.49    3.20
   6  -2   3   50.49    3.10
   6   2   3   44.20    3.00
  -6   2  -3   52.69    3.30
  -6   2  -3   50.19    3.30
  -6   2  -3   51.69    3.10
   6   2   3   48.90    3.00
  -6   2  -3   48.70    3.20
   6   2   3   43.70    2.80
  -7  -2  -3    7.20    1.70
  -7  -2  -3    5.60    1.80
  -7  -2  -3    4.70    1.60
  -7  -2  -3    2.00    2.10
   7  -2   3    5.80    1.90
   7  -2   3    4.00    1.60
   7   2   3    4.70    1.60
   7   2   3    3.70    1.40
  -7   2  -3    4.40    1.70
   7   2   3    2.50    1.40
  -7   2  -3    7.10    2.00
  -7   2  -3    2.90    1.50
   8  -2   3   13.40    2.30
  -8  -2  -3   12.80    2.10
   8  -2   3   13.20    2.40
  -8  -2  -3    9.70    2.90
  -8  -2  -3    9.40    2.10
   8  -2   3   15.80    2.40
  -8  -2  -3   12.70    2.30
   8   2   3   11.50    2.00
   8   2   3   13.40    3.60
   8   2   3   13.00    2.30
  -8   2  -3    7.70    2.10
  -8   2  -3   10.60    2.10
  -8   2  -3    7.90    2.20
  -8   2  -3    8.90    2.40
  -9  -2  -3    1.90    1.90
   9  -2   3    3.30    1.90
  -9  -2  -3    1.10    1.90
   9  -2   3    1.20    1.90
  -9  -2  -3   -0.10    1.90
   9  -2   3    1.70    2.10
  -9   2  -3    2.40    2.40
  -9   2  -3    0.90    1.70
  -9   2  -3    2.30    2.00
   9   2   3    0.00    1.60
  -9   2  -3   -1.00    2.00
   9   2   3    0.60    2.50
  10  -2   3   73.89    5.30
 -10  -2  -3   77.59    5.30
 -10  -2  -3   77.49    5.10
 -10  -2  -3   68.49    4.70
  10  -2   3  102.49    8.90
  10  -2   3   71.19    4.50
 -10   2  -3   79.59    5.30
  10   2   3   74.29    4.50
 -10   2  -3   68.49    5.80
 -10   2  -3   72.59    5.10
 -10   2  -3   70.39    5.00
  11  -2   3   13.30    3.40
 -11  -2  -3   18.40    3.20
  11  -2   3   18.50    3.20
 -11  -2  -3   21.60    3.30
 -11  -2  -3   17.10    3.20
 -11   2  -3   18.50    3.30
 -11   2  -3   24.10    3.80
  11   2   3   19.20    2.60
  11   2   3   21.20    3.00
 -11   2  -3   19.80    3.40
 -12  -2  -3    1.70    2.90
 -12  -2  -3   -0.10    2.80
 -12  -2  -3    2.70    2.60
  12  -2   3    5.90    3.50
 -12   2  -3    6.10    3.00
 -12   2  -3    4.40    3.00
 -12   2  -3    6.40    3.60
  12   2   3    5.50    2.50
 -13  -2  -3   -3.20    3.10
 -13  -2  -3   -2.40    3.20
 -13  -2  -3    0.20    2.70
 -13   2  -3   -5.00    3.20
 -13   2  -3    0.00    3.30
 -13   2  -3   -3.20    3.10
  13   2   3   -2.30    2.50
 -14  -2  -3   29.30    4.90
 -14   2  -3   28.70    5.00
 -14   2  -3   18.70    4.70
 -14   2  -3   28.00    4.80
  14   2   3   22.30    3.90
 -15  -2  -3    7.80    4.30
 -15  -2  -3    5.40    4.70
 -15  -2  -3   14.90    4.30
 -15   2  -3   11.40    5.00
 -15   2  -3    5.00    6.70
 -15   2  -3   12.90    4.60
 -16  -2  -3   -0.10    5.10
 -16  -2  -3    1.70    4.30
 -16  -2  -3    4.10    5.30
 -16   2  -3    0.80    5.00
 -16   2  -3    1.70    5.00
 -17  -3   3    2.30    4.20
 -17  -3   3   -1.30    3.80
  17  -3  -3   -2.10    5.40
 -17   3   3    8.80    4.80
  17   3  -3    0.90    3.90
 -17   3   3   -1.40    4.60
  16  -3  -3    3.60    3.10
 -16  -3   3    3.30    3.40
  16  -3  -3   12.30    5.40
 -16  -3   3    0.20    3.60
 -16   3   3    0.00    3.90
  16   3  -3   -0.40    3.40
 -16   3   3    2.10    3.90
 -16   3   3    4.80    4.20
  15  -3  -3   23.60    5.40
 -15  -3   3   15.60    3.60
 -15  -3   3   21.40    4.00
  15  -3  -3   15.00    3.30
  15   3  -3   14.70    3.70
 -15   3   3   14.00    3.90
 -15   3   3   13.90    3.70
 -15   3   3   19.80    4.60
  14  -3  -3    1.10    3.80
 -14  -3   3    1.50    2.70
 -14  -3   3    2.00    2.50
  14  -3  -3    2.40    4.60
  14  -3  -3    2.20    2.70
 -14   3   3    0.40    2.80
 -14   3   3    3.40    3.30
  13  -3  -3   46.70    6.00
 -13  -3   3   38.70    5.20
  13  -3  -3   44.90    9.20
  13  -3  -3   41.90    4.70
  13  -3  -3   44.50    4.40
 -13  -3   3   46.10    4.60
  13   3  -3   47.20    4.90
 -13   3   3   43.30    5.00
 -13   3   3   46.90    4.90
  12  -3  -3   28.00    4.00
 -12  -3   3   29.80    3.90
  12  -3  -3   34.10    5.00
  12  -3  -3   28.20    3.70
  12  -3  -3   34.10    4.00
 -12  -3   3   28.10    3.40
 -12   3   3   28.90    3.60
 -12   3   3   30.00    3.90
 -12   3   3   25.50    3.30
  12   3  -3   31.40    4.30
  11  -3  -3  213.68    8.60
  11  -3  -3  192.58    8.00
  11  -3  -3  202.18    8.30
 -11  -3   3  197.08    7.80
  11  -3  -3  214.08    9.50
 -11  -3   3  196.18    7.80
 -11   3   3  214.28    8.30
  11   3  -3  202.58    8.30
 -11   3   3  198.78    8.10
 -11   3   3  207.88    7.70
  10  -3  -3    1.10    2.00
  10  -3  -3    2.40    2.20
  10  -3  -3    0.90    2.60
 -10  -3   3    0.50    1.60
 -10  -3   3    1.60    1.50
  10  -3  -3   -0.10    2.00
 -10   3   3   -0.80    1.40
 -10   3   3   -1.10    1.70
  10   3  -3    0.00    1.90
 -10   3   3    1.10    1.60
 -10   3   3    2.70    4.80
  -9  -3   3  186.88    6.60
  -9  -3   3  181.08    6.60
  -9  -3   3  166.78    7.70
   9  -3  -3  183.68    7.90
  -9  -3   3  172.28    7.30
   9  -3  -3  186.78    8.00
   9  -3  -3  179.98    6.90
   9  -3  -3  181.48    7.00
   9   3  -3  174.38    6.60
  -9   3   3  174.98    6.90
   9   3  -3  173.78    7.00
  -9   3   3  181.28    6.80
  -9   3   3  168.28    7.80
  -9   3   3  183.28    6.60
   9   3  -3  173.38    6.60
  -8  -3   3   14.60    1.90
   8  -3  -3   14.60    2.20
  -8  -3   3   15.30    1.90
  -8  -3   3   18.40    2.60
  -8  -3   3   13.90    2.80
   8  -3  -3   12.50    2.60
   8  -3  -3   20.20    2.70
   8  -3  -3   14.10    2.20
   8   3  -3   12.00    1.70
  -8   3   3   14.20    2.00
   8   3  -3   16.60    2.40
   8   3  -3   10.60    1.70
  -8   3   3   14.10    2.90
   8   3  -3   10.50    3.00
  -8   3   3   17.00    2.20
  -8   3   3   13.20    2.00
  -7  -3   3  157.88    5.60
   7  -3  -3  161.08    6.10
   7  -3  -3  164.28    6.20
  -7  -3   3  153.28    6.60
  -7  -3   3  157.28    5.70
   7  -3  -3  169.28    6.90
  -7  -3   3  151.68    6.40
   7  -3  -3  165.08    6.10
  -7   3   3  186.18    6.10
   7   3  -3  157.18    5.70
  -7   3   3  194.28    6.20
   7   3  -3  158.28    6.70
   7   3  -3  158.88    6.20
   7   3  -3  157.68    5.70
  -7   3   3  157.68    6.70
  -6  -3   3    4.40    0.70
  -6  -3   3    1.70    1.60
  -6  -3   3    2.10    0.90
   6  -3  -3    2.50    1.60
  -6  -3   3    4.10    1.00
  -6  -3   3    0.60    1.60
   6  -3  -3    1.90    1.10
   6  -3  -3    0.70    1.40
  -6   3   3    0.90    1.30
  -6   3   3    1.60    1.60
  -6   3   3    3.80    1.20
  -6   3   3    4.40    1.20
   6   3  -3    2.30    1.40
   6   3  -3    2.50    1.00
   6   3  -3    1.70    0.90
   6   3  -3    2.20    1.60
  -5  -3   3  268.87    8.40
  -5  -3   3  291.67    8.40
   5  -3  -3  285.47    9.30
  -5  -3   3  275.77    9.20
  -5  -3   3  293.27    8.10
   5  -3  -3  283.47    8.80
   5  -3  -3  329.47    9.00
  -5  -3   3  287.07    9.30
   5  -3  -3  303.57    9.70
  -5   3   3  274.47    9.00
   5   3  -3  288.67    8.50
   5   3  -3  278.77    9.10
   5   3  -3  284.17    8.50
   5   3  -3  279.57    9.20
  -5   3   3  304.47    8.90
  -5   3   3  295.67    8.80
  -5   3   3  292.97    9.50
   4  -3  -3 1603.54   42.40
  -4  -3   3 1616.94   41.90
   4  -3  -3 1603.94   41.70
  -4  -3   3 1547.75   41.10
   4  -3  -3 1592.84   41.70
   4  -3  -3 1585.64   42.10
  -4  -3   3 1527.05   41.10
  -4  -3   3 1618.74   42.00
   4  -3  -3 1581.44   42.40
  -4  -3   3 1540.85   41.10
   4   3  -3 1547.95   41.20
  -4   3   3 1523.75   41.90
  -4   3   3 1619.04   42.20
   4   3  -3 1534.85   41.80
  -4   3   3 1526.25   41.50
  -4   3   3 1528.55   41.40
   4   3  -3 1571.94   41.20
   3  -3  -3   23.00    2.30
  -3  -3   3   28.60    2.10
  -3  -3   3   23.90    1.30
   3  -3  -3   21.60    2.30
   3  -3  -3   20.50    1.80
  -3  -3   3   28.90    1.60
  -3  -3   3   26.80    1.40
  -3  -3   3   21.00    2.00
   3  -3  -3   22.70    1.70
  -3  -3   3   24.80    1.40
   3  -3  -3   21.90    2.40
   3   3  -3   20.50    1.90
  -3   3   3   19.70    1.90
  -3   3   3   22.00    2.20
  -3   3   3   20.00    2.10
   3   3  -3   17.30    1.30
  -3   3   3   24.30    1.80
  -3   3   3   21.30    1.70
   3   3  -3   28.70    2.00
  -3   3   3   24.90    1.80
   3   3  -3   22.80    1.40
  -2  -3   3 3904.31   98.59
  -2  -3   3 3745.33   98.79
  -2  -3   3 3476.75   99.19
   2  -3  -3 3858.41   99.19
  -2  -3   3 3764.02   98.69
   2  -3  -3 3804.02   99.19
   2  -3  -3 3858.11   99.29
  -2   3   3 3837.32   98.99
   2   3  -3 3736.83   98.69
  -2   3   3 3815.02   99.29
  -2   3   3 3894.21   98.49
  -2   3   3 3748.92   98.99
  -2   3   3 3862.41   98.49
   1  -3  -3 4889.81  124.09
   1  -3  -3 4793.82  123.39
  -1  -3   3 4785.72  123.69
   1  -3  -3 4672.23  124.09
   1   3  -3 4735.53  123.49
  -1   3   3 4657.83  124.09
  -1   3   3 4802.92  123.89
   0  -3  -3   95.89    4.30
   0  -3   3   97.19    3.90
   0  -3   3  102.39    3.20
   0  -3  -3   99.59    3.60
   0  -3   3   98.79    3.10
   0  -3   3   99.29    3.10
   0  -3   3  103.99    3.20
   0  -3  -3   99.99    3.70
   0  -3  -3  106.69    4.10
   0  -3   3  105.29    3.90
   0  -3   3  104.89    3.60
   0   3   3   98.09    4.30
   0   3   3   97.69    3.50
   0   3   3  100.89    3.60
   0   3  -3  102.99    3.50
   0   3   3  100.89    4.10
   0   3  -3   99.29    3.90
   0   3  -3  103.89    3.20
   0   3   3   99.39    3.50
   0   3   3  100.19    3.10
   1  -3   3   85.89    2.90
   1  -3   3   87.79    3.00
   1  -3   3   88.79    2.90
  -1  -3  -3   81.59    3.20
   1  -3   3   91.99    3.70
  -1  -3  -3   90.89    2.60
  -1  -3  -3   87.39    3.30
  -1  -3  -3   93.39    3.70
  -1  -3  -3   82.49    3.70
   1  -3   3   84.69    2.90
   1  -3   3   90.09    3.60
  -1  -3  -3   93.49    4.30
  -1   3  -3   87.39    3.00
  -1   3  -3   88.89    3.60
  -1   3  -3   84.29    3.00
   1   3   3   86.49    3.20
   1   3   3   87.49    3.20
   1   3   3   86.49    3.70
  -1   3  -3   89.99    2.80
   1   3   3   88.09    4.20
  -1   3  -3   85.59    2.90
  -2  -3  -3   17.70    1.50
  -2  -3  -3   17.70    1.80
   2  -3   3   17.90    1.20
  -2  -3  -3   19.60    2.60
   2  -3   3   16.00    1.80
   2  -3   3   16.50    1.80
  -2  -3  -3   17.10    0.90
  -2  -3  -3   17.40    1.60
   2  -3   3   17.70    1.40
   2  -3   3   16.40    1.30
   2   3   3   17.00    1.40
  -2   3  -3   15.80    1.80
   2   3   3   18.20    2.40
  -2   3  -3   18.00    1.30
   2   3   3   20.60    2.00
   2   3   3   18.30    1.50
  -2   3  -3   18.30    1.40
  -2   3  -3   17.20    1.10
   3  -3   3  339.97    9.80
   3  -3   3  342.97    9.20
   3  -3   3  340.37    9.80
  -3  -3  -3  335.37   10.10
   3  -3   3  346.77    9.90
   3  -3   3  339.37   10.40
   3  -3   3  338.37   10.40
  -3  -3  -3  340.57   10.00
  -3  -3  -3  350.76   10.30
  -3   3  -3  337.87    9.80
   3   3   3  349.87   10.00
   3   3   3  336.97   11.20
  -3   3  -3  344.17    9.90
  -3   3  -3  327.87   10.40
   3   3   3  352.56   10.00
   4  -3   3  286.07    8.70
  -4  -3  -3  293.67    8.90
   4  -3   3  291.07    8.70
  -4  -3  -3  272.47    8.80
  -4  -3  -3  285.67    9.00
   4  -3   3  289.77    8.70
   4  -3   3  282.47    9.20
   4  -3   3  290.87    9.20
   4   3   3  282.27   10.00
  -4   3  -3  279.57    8.70
  -4   3  -3  308.77    8.80
   4   3   3  284.97    8.70
   4   3   3  288.17    8.80
  -4   3  -3  280.47    9.20
  -4   3  -3  286.17    8.70
   4   3   3  285.27    9.10
   5  -3   3  132.39    5.50
   5  -3   3  142.49    5.20
  -5  -3  -3  142.89    5.30
  -5  -3  -3  142.69    5.30
   5  -3   3  139.99    5.20
  -5  -3  -3  135.79    5.30
  -5   3  -3  144.69    5.20
  -5   3  -3  140.69    5.70
  -5   3  -3  141.69    5.30
   5   3   3  140.49    5.40
   5   3   3  138.69    5.20
   5   3   3  136.59    5.10
   5   3   3  146.59    6.70
  -5   3  -3  141.19    5.20
  -6  -3  -3    2.10    1.40
   6  -3   3    4.80    1.60
  -6  -3  -3    2.60    1.40
   6  -3   3    3.70    1.60
   6  -3   3   -0.20    1.30
   6  -3   3    2.10    1.40
  -6  -3  -3    3.60    1.60
   6   3   3    5.60    1.70
  -6   3  -3    0.80    1.30
   6   3   3    0.90    1.20
  -6   3  -3    2.90    1.50
   6   3   3    2.00    1.30
   6   3   3    3.00    2.70
  -6   3  -3    4.30    1.30
  -6   3  -3    2.30    1.50
   7  -3   3   35.40    3.10
  -7  -3  -3   30.80    3.00
  -7  -3  -3   33.30    3.20
  -7  -3  -3   34.50    2.90
   7  -3   3   34.50    3.00
   7  -3   3   30.30    3.10
   7  -3   3   34.60    3.10
   7   3   3   28.40    2.90
   7   3   3   37.20    3.00
  -7   3  -3   32.80    3.00
  -7   3  -3   39.40    3.40
   7   3   3   33.80    4.70
  -7   3  -3   31.90    2.90
   7   3   3   29.30    2.90
   8  -3   3   32.70    4.00
   8  -3   3   44.20    3.60
  -8  -3  -3   40.10    3.60
  -8  -3  -3   36.80    3.60
   8  -3   3   38.70    3.50
  -8  -3  -3   35.60    3.30
   8  -3   3   38.20    3.50
  -8   3  -3   40.00    3.80
   8   3   3   42.70    5.50
  -8   3  -3   42.80    3.60
   8   3   3   40.50    3.40
  -8   3  -3   33.60    4.00
  -9  -3  -3   -1.00    1.90
   9  -3   3    1.10    2.20
   9  -3   3    0.00    2.00
   9  -3   3    2.10    2.00
  -9  -3  -3    0.20    2.00
  -9  -3  -3    2.00    2.20
  -9   3  -3    5.60    2.70
  -9   3  -3   -2.70    1.90
   9   3   3    1.40    1.80
  -9   3  -3    0.30    2.10
   9   3   3   -0.50    3.40
  -9   3  -3    1.20    2.10
 -10  -3  -3   51.29    4.40
 -10  -3  -3   54.49    4.80
  10  -3   3   52.99    4.90
 -10  -3  -3   53.09    4.70
  10  -3   3   47.10    4.70
 -10   3  -3   51.99    4.60
 -10   3  -3   52.19    5.50
 -10   3  -3   52.49    4.60
 -10   3  -3   52.99    4.90
  10   3   3   49.90    6.40
  10   3   3   61.19    4.40
 -11  -3  -3    1.60    2.30
  11  -3   3    4.90    2.90
 -11  -3  -3    1.80    2.60
 -11   3  -3    4.70    2.70
 -11   3  -3    3.70    5.20
 -11   3  -3   -0.70    2.70
  11   3   3    2.60    2.50
  11   3   3    6.00    4.60
 -12  -3  -3    2.60    2.80
 -12  -3  -3    1.90    2.80
 -12   3  -3    6.70    3.40
  12   3   3    4.80    2.80
 -12   3  -3    7.40    3.30
 -12   3  -3    9.40    3.50
  12   3   3    4.00    4.80
 -13  -3  -3    2.10    3.70
 -13  -3  -3    2.00    3.40
 -13   3  -3    5.80    3.70
 -13   3  -3    7.80    3.70
 -13   3  -3   12.50    4.00
  13   3   3   12.40    6.20
  13   3   3    4.70    3.10
 -14  -3  -3    5.20    3.80
 -14  -3  -3    7.60    3.90
 -14  -3  -3   11.40    3.40
 -14   3  -3   10.30    4.60
  14   3   3   11.40    6.80
  14   3   3   10.70    3.60
 -14   3  -3    7.40    4.30
 -15  -3  -3    1.60    3.70
 -15  -3  -3    4.60    4.30
 -15  -3  -3    6.10    4.40
 -15   3  -3    4.80    4.70
  15   3   3   -0.10    6.80
 -15   3  -3    3.10    5.10
  15   3   3    2.50    3.90
 -17  -4   3    6.60    4.30
  17  -4  -3    1.00    5.80
 -17  -4   3   -1.40    3.80
 -17   4   3    1.00    5.10
 -17   4   3   10.30    5.30
  17   4  -3    2.20    4.30
  17   4  -3    2.20    7.40
  16  -4  -3   -1.30    5.00
 -16  -4   3    4.40    3.50
 -16  -4   3    4.90    3.50
 -16   4   3   -1.60    4.50
 -16   4   3   -0.20    4.30
  16   4  -3   -2.90    3.70
  16   4  -3   -3.80    6.00
 -15  -4   3   -2.70    2.80
  15  -4  -3    1.60    5.00
 -15  -4   3   -3.60    3.00
  15  -4  -3   -1.70    2.90
 -15   4   3    3.90    3.60
  15   4  -3    8.50    5.50
 -15   4   3    5.80    4.00
  15   4  -3   -4.80    3.00
 -15   4   3    3.30    3.70
  14  -4  -3    4.20    3.00
  14  -4  -3   -1.20    4.30
 -14  -4   3    2.60    2.80
 -14  -4   3    3.10    2.80
 -14   4   3    1.20    3.20
  14   4  -3    4.80    4.90
 -14   4   3    2.90    3.60
 -14   4   3    0.80    3.70
  14   4  -3    0.40    2.80
  13  -4  -3  111.59    7.50
 -13  -4   3  118.09    6.30
  13  -4  -3  106.39    6.10
 -13  -4   3  114.89    6.20
  13  -4  -3  121.49    8.10
 -13   4   3  105.69    6.80
  13   4  -3   93.69    7.20
 -13   4   3  119.29    6.60
 -13   4   3  112.69    7.30
  13   4  -3  107.99    8.50
  12  -4  -3  239.18    9.90
  12  -4  -3  240.08   10.80
  12  -4  -3  221.68    9.80
 -12   4   3  253.07    9.60
 -12   4   3  231.68    9.30
 -12   4   3  223.18    9.00
 -12   4   3  225.68    9.90
  12   4  -3  249.78    9.80
  12   4  -3  242.58   11.30
  11  -4  -3  113.79    6.30
 -11  -4   3  103.29    5.40
  11  -4  -3  106.89    6.30
 -11  -4   3  105.69    5.30
  11  -4  -3   95.89    6.00
  11  -4  -3  104.99    7.10
  11   4  -3  103.19    5.90
  11   4  -3  103.69    7.30
 -11   4   3   98.09    5.70
 -11   4   3  101.69    6.30
 -11   4   3  107.09    5.60
 -11   4   3  110.29    5.80
  10  -4  -3   43.00    4.30
  10  -4  -3   34.90    4.30
 -10  -4   3   33.50    3.20
  10  -4  -3   43.80    5.00
 -10  -4   3   33.40    3.20
 -10   4   3   34.70    4.10
 -10   4   3   38.00    3.70
  10   4  -3   36.90    4.80
 -10   4   3   35.30    3.60
  10   4  -3   32.60    3.90
  -9  -4   3   40.50    3.10
  -9  -4   3   44.90    3.10
   9  -4  -3   40.80    4.50
   9  -4  -3   33.30    3.70
   9  -4  -3   42.50    4.00
  -9  -4   3   46.90    6.00
   9  -4  -3   48.20    3.80
  -9  -4   3   29.30    4.80
  -9   4   3   36.20    4.70
  -9   4   3   40.40    3.40
   9   4  -3   41.80    3.80
  -9   4   3   42.50    3.90
  -9   4   3   44.20    3.60
  -9   4   3   41.30    3.50
   9   4  -3   38.60    4.60
  -8  -4   3  228.98    7.60
  -8  -4   3  229.68    8.80
   8  -4  -3  245.78    9.40
   8  -4  -3  229.48    8.30
  -8  -4   3  234.48    7.70
  -8  -4   3  237.38    9.20
   8  -4  -3  229.58    8.50
   8  -4  -3  232.58    8.20
  -8   4   3  229.68    9.10
  -8   4   3  229.68    8.20
   8   4  -3  232.08    7.80
  -8   4   3  237.48    8.60
  -8   4   3  228.58    8.00
  -8   4   3  232.48    8.00
   8   4  -3  232.18    8.50
   8   4  -3  222.18    7.70
   8   4  -3  232.58    9.20
   7  -4  -3  888.71   24.80
  -7  -4   3  874.21   25.50
  -7  -4   3  883.31   25.40
  -7  -4   3  870.91   24.30
   7  -4  -3  886.91   25.80
   7  -4  -3  905.11   24.80
   7  -4  -3  886.81   25.30
  -7  -4   3  889.81   23.50
  -7  -4   3  903.21   24.20
  -7   4   3  874.21   25.20
  -7   4   3  892.71   24.70
   7   4  -3  858.81   24.30
   7   4  -3  874.11   25.60
   7   4  -3  884.71   25.20
  -7   4   3  926.41   24.70
  -7   4   3  892.01   25.70
  -7   4   3  902.01   25.10
   7   4  -3  887.91   24.40
  -6  -4   3  650.23   18.00
  -6  -4   3  626.54   18.10
  -6  -4   3  652.53   19.20
   6  -4  -3  661.53   18.70
  -6  -4   3  636.24   19.20
   6  -4  -3  658.33   19.20
   6  -4  -3  640.94   19.60
   6  -4  -3  662.23   18.60
  -6  -4   3  639.94   17.70
  -6   4   3  719.43   19.20
  -6   4   3  611.04   18.90
   6   4  -3  649.74   19.00
   6   4  -3  637.94   18.10
  -6   4   3  695.03   18.60
   6   4  -3  654.43   18.20
  -6   4   3  757.62   18.60
   6   4  -3  640.54   19.30
  -6   4   3  632.84   19.40
  -5  -4   3 1407.96   37.00
   5  -4  -3 1420.26   38.30
   5  -4  -3 1438.26   37.60
   5  -4  -3 1412.66   37.60
  -5  -4   3 1360.86   37.00
   5  -4  -3 1401.86   38.70
  -5  -4   3 1395.86   37.00
  -5  -4   3 1356.46   38.10
   5  -4  -3 1425.36   38.60
   5   4  -3 1399.36   37.10
   5   4  -3 1374.06   38.00
  -5   4   3 1408.06   38.40
  -5   4   3 1373.46   37.90
  -5   4   3 1399.76   37.50
  -5   4   3 1392.66   38.10
   5   4  -3 1423.36   37.10
   5   4  -3 1449.55   38.30
   4  -4  -3   12.10    2.00
  -4  -4   3   20.20    2.20
  -4  -4   3   15.70    1.20
  -4  -4   3   16.90    1.20
   4  -4  -3   14.10    1.80
  -4  -4   3   18.60    2.40
  -4  -4   3   23.00    2.30
  -4  -4   3   15.60    1.40
   4  -4  -3   12.90    2.20
   4  -4  -3   16.20    1.80
   4  -4  -3   14.60    2.30
  -4  -4   3   15.20    1.60
   4   4  -3   16.30    2.30
   4   4  -3   15.70    2.00
   4   4  -3   18.00    1.40
  -4   4   3   13.40    1.70
  -4   4   3   15.50    2.10
  -4   4   3   11.70    1.90
  -4   4   3   14.50    1.80
  -4   4   3   16.30    1.80
   4   4  -3   16.20    1.40
  -4   4   3   14.00    1.80
  -3  -4   3 3493.15   79.59
   3  -4  -3 2846.62   78.69
  -3  -4   3 3456.55   79.39
  -3  -4   3 3469.35   79.39
  -3  -4   3 2771.12   78.19
   3  -4  -3 2797.42   79.39
  -3  -4   3 3413.36   78.89
   3  -4  -3 2830.12   79.69
   3  -4  -3 2746.13   79.39
   3  -4  -3 2809.42   78.59
  -3  -4   3 3220.98   77.99
  -3  -4   3 3561.24   77.99
  -3   4   3 2806.12   79.29
   3   4  -3 3130.69   79.09
  -3   4   3 2766.22   79.19
  -3   4   3 2767.72   78.69
  -3   4   3 2832.12   78.59
  -3   4   3 2692.13   78.49
  -3   4   3 2839.82   78.59
   2  -4  -3    4.60    1.00
   2  -4  -3    3.40    1.60
  -2  -4   3    3.60    1.50
   2  -4  -3    4.50    1.10
   2  -4  -3    4.50    1.60
  -2  -4   3    3.30    1.20
   2  -4  -3    1.90    1.70
  -2  -4   3    6.50    0.70
  -2  -4   3    3.10    1.30
  -2  -4   3    6.40    1.30
  -2  -4   3    4.60    0.60
   2   4  -3    4.60    1.20
  -2   4   3    3.50    1.40
  -2   4   3    2.70    1.40
  -2   4   3    9.00    2.10
   2   4  -3    5.70    0.70
  -2   4   3    3.10    1.00
  -2   4   3    4.50    1.20
  -2   4   3    5.30    1.10
   2   4  -3    6.40    1.60
  -2   4   3    4.10    1.00
   2   4  -3    4.20    1.40
  -2   4   3    3.90    0.90
  -1  -4   3 1735.23   46.00
   1  -4  -3 1761.42   46.70
  -1  -4   3 1845.62   47.30
   1  -4  -3 1776.32   47.60
  -1  -4   3 1784.92   47.10
   1  -4  -3 1746.13   46.70
  -1  -4   3 1825.12   47.10
  -1  -4   3 1758.02   46.60
   1  -4  -3 1813.42   47.90
   1  -4  -3 1815.42   47.70
  -1  -4   3 1762.72   46.10
  -1  -4   3 1809.72   47.30
  -1   4   3 1763.92   46.70
  -1   4   3 1754.92   46.60
   1   4  -3 1772.12   47.30
   1   4  -3 1744.33   46.90
   1   4  -3 1781.02   47.40
  -1   4   3 1779.42   47.50
   1   4  -3 1760.32   46.10
  -1   4   3 1766.72   46.70
  -1   4   3 1778.42   47.40
  -1   4   3 1781.52   46.60
  -1   4   3 1760.72   46.60
  -1   4   3 1767.02   47.90
   0  -4  -3 1305.37   33.80
   0  -4  -3 1318.67   35.40
   0  -4  -3 1322.47   34.80
   0  -4   3 1292.07   34.60
   0  -4   3 1302.07   34.60
   0  -4   3 1296.17   34.80
   0  -4   3 1292.97   33.40
   0  -4  -3 1235.58   34.00
   0  -4  -3 1283.07   34.90
   0  -4   3 1290.37   33.40
   0  -4   3 1273.87   33.90
   0  -4  -3 1269.77   34.10
   0  -4   3 1293.37   33.50
   0   4  -3 1262.67   33.50
   0   4   3 1316.37   34.00
   0   4   3 1292.37   34.80
   0   4  -3 1282.17   34.20
   0   4   3 1296.57   34.10
   0   4   3 1262.67   33.90
   0   4  -3 1266.07   34.70
   0   4   3 1285.17   35.30
   0   4   3 1266.97   34.00
   0   4   3 1261.67   33.80
   1  -4   3   83.99    3.70
   1  -4   3   79.79    3.10
  -1  -4  -3   75.79    3.20
  -1  -4  -3   76.19    3.20
  -1  -4  -3   84.39    2.80
   1  -4   3   84.39    3.20
   1  -4   3   82.69    2.70
  -1  -4  -3   77.09    3.80
   1  -4   3   81.69    3.90
  -1  -4  -3   80.59    3.80
   1  -4   3   82.09    2.80
  -1  -4  -3   77.99    4.40
   1  -4   3   83.99    3.70
  -1   4  -3   84.79    3.20
   1   4   3   73.19    3.70
  -1   4  -3   79.19    2.70
  -1   4  -3   78.69    3.70
   1   4   3   82.09    3.10
   1   4   3   82.49    2.90
   1   4   3   74.39    4.20
   1   4   3   81.99    3.00
  -2  -4  -3  685.83   19.30
   2  -4   3  699.73   19.00
  -2  -4  -3  695.23   18.70
   2  -4   3  720.63   20.00
  -2  -4  -3  729.83   20.80
   2  -4   3  695.83   20.00
   2  -4   3  707.03   19.00
  -2  -4  -3  715.63   19.40
   2  -4   3  709.63   19.00
   2  -4   3  711.53   19.20
  -2   4  -3  705.33   19.00
  -2   4  -3  706.23   19.00
   2   4   3  710.33   19.30
  -2   4  -3  714.73   20.00
   2   4   3  686.73   20.70
   2   4   3  705.73   19.90
  -2   4  -3  712.33   19.10
   2   4   3  710.83   19.20
  -2   4  -3  713.13   19.10
   3  -4   3    5.70    1.10
   3  -4   3    3.40    1.40
  -3  -4  -3    3.30    1.00
  -3  -4  -3    4.90    1.50
   3  -4   3    1.30    1.50
   3  -4   3    4.40    0.80
  -3  -4  -3    5.60    1.20
   3  -4   3    4.30    1.20
  -3  -4  -3    3.00    2.00
   3  -4   3    4.50    1.00
  -3  -4  -3    4.30    0.80
  -3   4  -3    4.20    1.10
   3   4   3    6.10    2.30
  -3   4  -3    4.20    1.00
  -3   4  -3    2.80    1.30
   3   4   3    3.50    1.10
  -3   4  -3    2.40    0.90
   3   4   3    2.90    1.00
   3   4   3    4.70    1.50
   4  -4   3 1611.24   43.00
   4  -4   3 1586.84   43.70
   4  -4   3 1637.94   43.90
   4  -4   3 1595.84   42.90
  -4  -4  -3 1591.14   43.10
  -4  -4  -3 1628.64   43.20
  -4  -4  -3 1625.14   42.50
  -4  -4  -3 1617.44   43.60
   4  -4   3 1618.34   42.20
  -4   4  -3 1615.04   43.00
   4   4   3 1636.94   43.80
  -4   4  -3 1637.14   43.80
   4   4   3 1645.84   44.80
   4   4   3 1613.64   43.30
  -4   4  -3 1630.94   43.00
   4   4   3 1602.24   43.00
   4   4   3 1627.04   43.10
   5  -4   3  222.98    8.00
  -5  -4  -3  215.88    7.30
  -5  -4  -3  206.88    7.20
   5  -4   3  217.88    7.80
   5  -4   3  207.48    7.20
  -5  -4  -3  210.18    7.50
   5  -4   3  218.58    7.10
   5  -4   3  216.68    7.10
   5   4   3  222.88    7.30
  -5   4  -3  215.38    7.10
  -5   4  -3  217.38    7.20
   5   4   3  207.38    7.00
   5   4   3  211.48    7.10
  -5   4  -3  209.78    7.80
   5   4   3  211.98    8.80
   5   4   3  213.48    7.70
  -6  -4  -3   78.59    4.00
   6  -4   3   78.89    3.90
   6  -4   3   86.69    4.00
   6  -4   3   79.69    4.10
  -6  -4  -3   77.79    4.00
  -6  -4  -3   76.29    4.40
   6  -4   3   78.19    4.30
  -6   4  -3   76.59    4.50
   6   4   3   78.39    4.40
   6   4   3   74.89    5.60
  -6   4  -3   82.89    4.30
   6   4   3   75.49    3.90
  -6   4  -3   79.69    3.90
   6   4   3   78.19    3.90
   6   4   3   80.79    3.90
  -6   4  -3   78.99    3.90
   7  -4   3   12.40    2.50
   7  -4   3    7.80    2.10
  -7  -4  -3    8.90    2.00
  -7  -4  -3    8.10    2.20
   7  -4   3   11.90    2.00
  -7  -4  -3    8.40    1.90
   7  -4   3   10.00    2.00
   7   4   3    9.70    2.20
  -7   4  -3    8.30    2.30
   7   4   3   11.50    2.00
   7   4   3   13.90    3.60
  -7   4  -3    9.70    2.30
  -7   4  -3    8.40    1.90
  -7   4  -3    7.40    1.70
  -8  -4  -3   60.99    4.10
   8  -4   3   61.89    4.20
  -8  -4  -3   61.29    4.30
  -8  -4  -3   58.19    4.50
   8  -4   3   60.79    4.40
   8  -4   3   63.49    4.20
  -8   4  -3   60.49    4.30
   8   4   3   64.49    6.30
   8   4   3   64.59    3.50
  -8   4  -3   56.49    4.70
  -8   4  -3   63.59    4.80
  -8   4  -3   62.19    4.20
   8   4   3   63.69    4.60
   9  -4   3    3.80    2.50
   9  -4   3    6.00    2.40
  -9  -4  -3    0.90    1.90
   9  -4   3    3.50    2.30
  -9  -4  -3    3.30    2.00
   9   4   3    3.90    1.70
  -9   4  -3    7.30    2.30
   9   4   3    2.80    3.40
   9   4   3    0.90    2.20
  -9   4  -3   -0.20    2.40
  -9   4  -3    3.00    2.30
  -9   4  -3    3.70    2.70
  10  -4   3   18.80    3.30
 -10  -4  -3   15.10    3.10
  10  -4   3   21.70    3.30
 -10  -4  -3   16.10    3.00
  10  -4   3   16.10    3.40
 -10   4  -3   19.40    3.00
 -10   4  -3   12.00    3.60
 -10   4  -3   20.00    4.10
 -10   4  -3   19.20    3.30
  10   4   3   21.00    3.20
  10   4   3   18.60    4.70
  10   4   3   21.40    2.60
 -11  -4  -3   10.10    2.90
 -11  -4  -3   15.50    3.20
  11   4   3   12.90    4.80
  11   4   3   16.40    3.30
 -11   4  -3    9.70    3.10
 -11   4  -3    8.80    3.20
 -11   4  -3   17.50    3.70
 -12  -4  -3   -0.60    2.90
 -12  -4  -3   -3.80    2.80
  12   4   3   -2.20    2.90
 -12   4  -3   -1.90    2.90
 -12   4  -3   -4.60    3.10
 -12   4  -3   -3.30    3.10
  12   4   3    1.40    4.90
 -13  -4  -3    1.10    3.30
 -13  -4  -3    2.30    3.40
  13   4   3   -5.40    3.20
 -13   4  -3   -0.40    3.60
 -13   4  -3    4.90    4.00
  13   4   3   -1.50    5.60
 -14  -4  -3   -0.60    3.70
 -14  -4  -3   -5.40    4.00
  14   4   3    5.20    4.00
 -14   4  -3   10.50    4.40
 -14   4  -3    1.20    4.80
  14   4   3    7.80    6.50
 -15  -4  -3   -0.70    4.30
 -15  -4  -3    1.00    4.30
 -15   4  -3   10.40    4.90
 -15   4  -3    8.20    5.50
  15   4   3    3.10    4.50
  15   4   3   -7.60    7.00
 -16  -5   3   -2.70    3.40
 -16  -5   3    1.40    3.70
  16  -5  -3   -5.40    5.70
  16   5  -3   -1.20    6.70
  16   5  -3    5.70    4.20
 -16   5   3    6.50    4.80
 -16   5   3   -2.10    5.00
 -15  -5   3    2.70    3.30
 -15  -5   3    9.60    3.30
  15  -5  -3   22.70    5.80
  15   5  -3   13.40    4.10
 -15   5   3    5.10    4.10
  15   5  -3   19.60    6.40
 -15   5   3    6.20    4.50
 -14  -5   3    1.70    2.90
  14  -5  -3    3.80    3.00
 -14  -5   3   -0.60    2.80
  14  -5  -3    6.80    4.60
 -14   5   3   -6.60    3.40
  14   5  -3    0.10    3.20
  14   5  -3    6.40    5.30
 -14   5   3    0.10    3.40
 -13  -5   3    3.70    2.60
  13  -5  -3   -3.90    4.30
 -13  -5   3   -1.60    2.20
  13   5  -3   -1.60    4.30
 -13   5   3    3.20    3.10
  13   5  -3   -0.30    2.90
 -13   5   3    0.60    2.70
 -13   5   3   -0.60    3.30
 -13   5   3    1.80    3.20
  12  -5  -3   42.30    6.30
 -12  -5   3   36.40    4.00
  12  -5  -3   42.70    5.00
 -12  -5   3   39.20    4.20
  12  -5  -3   40.00    5.30
  12   5  -3   39.70    4.70
 -12   5   3   40.70    4.80
  12   5  -3   47.30    7.00
 -12   5   3   39.90    4.60
 -12   5   3   36.80    4.80
 -12   5   3   42.40    5.30
 -11  -5   3   39.60    5.50
 -11  -5   3   32.70    3.60
  11  -5  -3   39.10    5.00
  11  -5  -3   43.70    5.30
 -11   5   3   34.70    4.20
  11   5  -3   40.20    4.50
  11   5  -3   42.20    5.60
 -11   5   3   38.60    4.30
 -11   5   3   45.10    4.60
  10  -5  -3   37.90    4.00
  10  -5  -3   34.70    3.80
  10  -5  -3   30.40    4.40
 -10  -5   3   35.40    3.30
 -10  -5   3   34.40    3.20
 -10   5   3   38.60    4.50
 -10   5   3   34.70    3.80
 -10   5   3   35.30    4.10
  10   5  -3   36.60    4.20
 -10   5   3   37.30    3.90
  10   5  -3   34.30    4.80
   9  -5  -3   10.70    3.30
   9  -5  -3   15.50    2.70
  -9  -5   3   14.40    2.20
   9  -5  -3    9.70    2.30
  -9  -5   3   13.40    1.90
   9   5  -3   11.40    3.60
  -9   5   3   13.00    2.30
  -9   5   3   13.80    2.70
   9   5  -3   11.90    2.60
  -9   5   3   11.60    2.00
  -9   5   3   15.50    2.80
  -8  -5   3  289.77    9.00
   8  -5  -3  289.17    9.70
   8  -5  -3  296.57   11.00
   8  -5  -3  276.57   10.30
   8  -5  -3  295.17    9.80
  -8  -5   3  273.17   10.60
  -8  -5   3  288.67    9.10
  -8   5   3  275.97   10.60
   8   5  -3  276.57   10.80
  -8   5   3  283.57   10.00
   8   5  -3  271.17    9.10
  -8   5   3  285.07   10.20
  -8   5   3  288.07    9.50
  -8   5   3  291.87    9.40
   8   5  -3  283.57   10.10
   7  -5  -3   40.40    4.30
  -7  -5   3   42.90    2.50
   7  -5  -3   36.70    3.90
  -7  -5   3   36.40    4.10
  -7  -5   3   41.10    2.30
   7  -5  -3   38.50    3.20
  -7  -5   3   40.30    3.80
   7  -5  -3   34.00    4.50
  -7  -5   3   42.00    2.50
  -7   5   3   41.30    4.10
   7   5  -3   37.00    4.20
   7   5  -3   41.70    3.60
   7   5  -3   36.90    2.70
  -7   5   3   35.90    3.50
  -7   5   3   41.10    3.00
  -7   5   3   39.10    3.00
  -7   5   3   41.40    3.60
   7   5  -3   34.50    2.60
  -6  -5   3   11.80    1.60
   6  -5  -3   11.20    2.60
   6  -5  -3   13.80    2.00
  -6  -5   3   12.90    1.70
  -6  -5   3   12.90    1.60
   6  -5  -3   15.60    2.80
  -6  -5   3   17.00    2.50
  -6  -5   3   14.70    2.70
   6  -5  -3   11.00    1.90
   6  -5  -3   11.60    2.70
   6   5  -3   14.50    1.60
   6   5  -3   12.50    1.50
   6   5  -3   15.90    3.00
  -6   5   3   11.20    2.20
  -6   5   3   12.90    2.20
   6   5  -3   13.70    2.30
  -6   5   3   15.10    2.50
  -6   5   3   17.60    2.90
   5  -5  -3  126.79    5.10
  -5  -5   3  134.09    5.60
   5  -5  -3  120.69    5.00
  -5  -5   3  116.99    4.10
   5  -5  -3  113.79    6.10
  -5  -5   3  132.59    6.10
  -5  -5   3  141.69    4.80
  -5  -5   3  147.29    4.40
  -5  -5   3  113.99    5.50
   5  -5  -3  125.99    6.10
  -5  -5   3  120.19    4.20
   5  -5  -3  126.79    5.80
   5   5  -3  139.19    5.80
   5   5  -3  136.99    4.30
  -5   5   3  127.99    4.80
  -5   5   3  112.59    5.50
  -5   5   3  117.39    5.30
   5   5  -3  145.69    4.50
  -5   5   3  112.89    4.80
   5   5  -3  129.49    5.50
   4  -5  -3  286.17   10.50
   4  -5  -3  283.07   10.70
   4  -5  -3  283.87   10.40
  -4  -5   3  362.56   10.50
   4  -5  -3  294.07    9.40
  -4  -5   3  366.06   10.30
  -4  -5   3  350.46   10.70
  -4  -5   3  371.86    9.70
  -4  -5   3  340.47    8.70
   4  -5  -3  298.77    9.50
  -4  -5   3  329.47    8.50
  -4   5   3  291.57    9.50
  -4   5   3  286.37    9.20
  -4   5   3  291.97    9.70
  -4   5   3  279.57   10.10
  -4   5   3  280.27   10.10
   4   5  -3  360.66   10.30
  -4   5   3  289.07    9.30
  -4   5   3  282.47    9.30
   3  -5  -3  302.67   11.30
  -3  -5   3  344.17    9.40
   3  -5  -3  333.37   10.10
  -3  -5   3  362.26   10.40
  -3  -5   3  402.86   11.40
  -3  -5   3  368.56   10.90
   3  -5  -3  332.67   10.00
  -3  -5   3  328.57    9.20
   3  -5  -3  324.77   11.10
   3  -5  -3  328.67   11.20
  -3   5   3  332.37   11.00
  -3   5   3  324.77   10.90
   3   5  -3  368.26   10.70
  -3   5   3  338.77   10.00
  -3   5   3  331.47   10.30
   3   5  -3  361.86    9.40
  -3   5   3  333.67    9.80
  -3   5   3  331.37   10.00
  -3   5   3  332.37   10.10
   2  -5  -3 1483.95   40.20
   2  -5  -3 1523.75   42.00
   2  -5  -3 1490.05   41.60
   2  -5  -3 1596.14   41.70
   2  -5  -3 1454.05   40.30
  -2  -5   3 1520.75   40.90
  -2  -5   3 1533.85   41.10
  -2  -5   3 1585.64   41.50
   2  -5  -3 1487.45   41.20
  -2  -5   3 1506.65   41.00
   2   5  -3 1741.03   41.60
  -2   5   3 1469.05   40.20
  -2   5   3 1528.35   40.40
  -2   5   3 1617.84   42.20
  -2   5   3 1501.95   40.30
   2   5  -3 1433.66   40.80
   2   5  -3 1540.55   41.40
  -2   5   3 1509.25   41.30
  -2   5   3 1556.44   40.40
  -2   5   3 1487.85   41.40
  -2   5   3 1470.15   40.50
  -1  -5   3    2.90    1.80
  -1  -5   3    4.00    1.20
  -1  -5   3    4.70    1.40
  -1  -5   3    2.10    1.20
   1  -5  -3    6.30    1.70
  -1  -5   3    3.20    1.40
   1  -5  -3    4.80    1.20
   1  -5  -3    2.30    2.20
   1  -5  -3    4.40    1.10
   1  -5  -3    1.10    1.40
   1  -5  -3    6.60    2.10
   1   5  -3    1.20    1.20
  -1   5   3    3.80    1.20
  -1   5   3    4.00    2.10
  -1   5   3    1.10    1.10
   1   5  -3    1.50    1.60
   1   5  -3    2.70    1.50
  -1   5   3    6.10    1.10
  -1   5   3    5.10    1.70
  -1   5   3    1.60    1.00
   0  -5   3 1087.49   29.60
   0  -5   3 1067.49   29.90
   0  -5  -3 1065.59   28.80
   0  -5   3 1054.09   28.10
   0  -5   3 1076.69   29.60
   0  -5  -3 1119.69   30.10
   0  -5   3 1091.99   29.20
   0  -5  -3 1084.59   29.80
   0  -5   3 1058.69   28.90
   0  -5  -3 1117.39   28.80
   0  -5  -3 1077.59   28.90
   0  -5  -3 1086.69   30.00
   0   5   3 1038.00   30.40
   0   5   3 1090.09   28.80
   0   5  -3 1065.29   28.20
   0   5   3 1080.19   28.60
   0   5  -3 1054.59   29.70
   0   5   3 1086.69   29.80
   0   5  -3 1083.29   29.20
   0   5   3 1081.69   28.90
   0   5   3 1083.39   28.80
  -1  -5  -3   49.10    3.30
  -1  -5  -3   57.39    3.50
  -1  -5  -3   54.99    2.70
  -1  -5  -3   50.29    2.60
   1  -5   3   53.99    2.00
   1  -5   3   54.39    1.90
   1  -5   3   55.79    2.80
   1  -5   3   58.99    3.70
   1  -5   3   53.69    2.10
   1  -5   3   53.99    3.40
   1  -5   3   50.89    2.70
  -1  -5  -3   52.49    2.40
   1  -5   3   52.09    3.30
  -1  -5  -3   52.59    4.10
  -1   5  -3   54.39    3.30
   1   5   3   56.59    2.60
  -1   5  -3   56.39    2.80
   1   5   3   50.39    2.40
   1   5   3   51.29    4.00
  -1   5  -3   57.29    2.10
   1   5   3   52.99    2.60
   1   5   3   53.79    2.70
   1   5   3   57.89    3.40
   1   5   3   51.09    2.50
   2  -5   3   49.10    3.40
  -2  -5  -3   47.90    2.60
  -2  -5  -3   50.49    3.50
   2  -5   3   42.80    3.50
  -2  -5  -3   46.30    2.60
  -2  -5  -3   47.00    3.30
   2  -5   3   49.99    2.20
   2  -5   3   49.10    2.10
  -2  -5  -3   51.09    2.20
   2  -5   3   48.40    3.40
   2  -5   3   47.80    2.60
  -2  -5  -3   51.69    4.20
   2  -5   3   47.70    2.80
  -2   5  -3   40.20    3.20
   2   5   3   42.70    3.90
  -2   5  -3   52.69    2.50
   2   5   3   49.60    3.20
   2   5   3   50.29    2.50
  -2   5  -3   49.60    2.20
   2   5   3   50.49    2.40
  -2   5  -3   52.89    2.20
   3  -5   3   91.29    5.00
  -3  -5  -3   88.79    3.20
  -3  -5  -3   84.89    4.40
   3  -5   3   84.99    4.50
   3  -5   3   85.59    3.30
   3  -5   3   88.09    3.40
   3  -5   3   82.29    4.50
   3  -5   3   83.99    3.40
  -3  -5  -3   86.09    5.50
  -3  -5  -3   89.99    3.70
  -3  -5  -3   87.79    3.70
  -3   5  -3   88.39    3.40
  -3   5  -3   90.89    3.40
  -3   5  -3   92.69    3.60
   3   5   3   89.79    5.40
   3   5   3   85.09    3.40
   3   5   3   85.59    3.60
   3   5   3   83.19    4.20
  -3   5  -3   88.49    4.50
   4  -5   3   65.49    2.70
   4  -5   3   66.69    4.10
  -4  -5  -3   69.29    2.70
  -4  -5  -3   61.89    3.90
   4  -5   3   58.79    3.00
  -4  -5  -3   60.49    3.40
   4  -5   3   65.69    4.10
   4  -5   3   61.59    3.00
  -4  -5  -3   61.19    3.20
  -4  -5  -3   59.19    5.30
   4  -5   3   63.09    3.50
  -4   5  -3   64.19    3.10
  -4   5  -3   65.69    4.00
   4   5   3   63.09    3.00
   4   5   3   68.29    3.70
  -4   5  -3   65.89    3.30
  -4   5  -3   69.19    3.10
   4   5   3   65.39    3.30
   4   5   3   61.59    4.80
   5  -5   3    2.60    0.90
   5  -5   3    2.10    1.40
  -5  -5  -3    2.50    1.90
  -5  -5  -3    1.60    1.40
   5  -5   3   -0.60    1.90
   5  -5   3   -0.60    1.90
  -5  -5  -3    1.40    1.20
   5  -5   3    0.20    1.10
  -5  -5  -3    0.90    1.10
   5  -5   3    0.50    1.20
   5   5   3    3.10    2.60
  -5   5  -3    0.70    1.30
  -5   5  -3   -0.20    1.20
   5   5   3    3.60    1.50
   5   5   3    2.20    1.20
  -5   5  -3   -1.00    1.70
  -5   5  -3    2.00    1.60
   5   5   3    0.00    2.00
   5   5   3    1.20    1.50
   6  -5   3  464.25   13.90
   6  -5   3  454.55   12.20
  -6  -5  -3  447.76   14.40
   6  -5   3  455.85   13.50
  -6  -5  -3  451.55   13.40
  -6  -5  -3  452.85   13.70
   6  -5   3  437.36   13.50
  -6  -5  -3  454.45   13.70
   6   5   3  461.25   14.60
   6   5   3  455.55   13.60
  -6   5  -3  457.65   13.60
  -6   5  -3  452.25   13.80
   6   5   3  451.55   15.80
  -6   5  -3  479.05   14.70
   7  -5   3    2.00    1.80
   7  -5   3    0.20    1.80
  -7  -5  -3    0.90    1.70
  -7  -5  -3    2.50    1.50
   7  -5   3    2.50    1.70
  -7   5  -3    0.00    1.70
  -7   5  -3    4.70    2.20
  -7   5  -3   -0.30    1.60
   7   5   3    1.10    2.10
  -7   5  -3    1.50    2.30
   7   5   3    3.70    3.50
   7   5   3    3.20    1.70
   8  -5   3   25.00    3.10
  -8  -5  -3   28.50    3.50
  -8  -5  -3   28.50    3.60
   8  -5   3   28.70    3.20
   8  -5   3   30.00    3.60
  -8   5  -3   27.00    3.30
   8   5   3   27.50    4.80
   8   5   3   28.90    2.80
  -8   5  -3   27.20    3.40
  -8   5  -3   29.70    4.00
  -8   5  -3   32.80    4.20
   8   5   3   23.50    3.50
   9  -5   3  129.29    6.80
   9  -5   3  140.59    6.50
  -9  -5  -3  128.09    6.50
   9  -5   3  135.19    6.40
  -9   5  -3  136.49    6.40
  -9   5  -3  141.79    6.50
   9   5   3  131.39    9.90
   9   5   3  135.49    5.30
   9   5   3  138.79    7.00
  -9   5  -3  131.79    7.00
  10  -5   3   89.09    6.30
  10  -5   3  100.99    6.30
 -10  -5  -3  100.39    6.00
 -10  -5  -3  101.89    5.90
  10  -5   3   85.09    5.90
  10   5   3   98.39    4.20
  10   5   3   96.59    6.20
 -10   5  -3   95.59    6.80
 -10   5  -3   92.79    6.10
 -10   5  -3   93.99    6.60
 -10   5  -3   91.09    5.90
  10   5   3  100.49    8.20
 -11  -5  -3   16.30    3.30
 -11  -5  -3   13.30    3.20
  11  -5   3   12.70    3.70
 -11   5  -3   10.40    3.60
  11   5   3   14.10    5.20
 -11   5  -3   15.00    3.80
 -11   5  -3   13.30    3.70
 -12  -5  -3    0.40    3.10
 -12  -5  -3    6.60    3.20
  12   5   3    1.40    3.30
 -12   5  -3    0.70    3.40
  12   5   3    1.40    5.00
 -12   5  -3    0.80    3.30
 -13  -5  -3   12.60    3.80
 -13  -5  -3    5.90    3.50
  13   5   3   -1.40    6.00
  13   5   3    5.40    4.10
 -13   5  -3    5.70    4.10
 -13   5  -3   -0.30    4.10
 -14  -5  -3    6.80    4.10
 -14  -5  -3    6.50    3.90
  14   5   3    7.30    4.90
 -14   5  -3    6.40    4.90
 -14   5  -3    7.60    5.10
  14   5   3   22.80    7.30
 -16  -6   3    7.90    4.00
  16  -6  -3    9.70    6.40
 -16  -6   3   -1.00    3.80
 -16   6   3    1.00    5.40
  16   6  -3   -2.30    6.90
  16   6  -3   -7.40    4.50
 -16   6   3    3.80    5.20
 -15  -6   3   25.10    4.30
  15  -6  -3    5.70    5.90
 -15  -6   3   28.70    4.20
  15   6  -3   31.00    5.40
  15   6  -3   22.40    7.10
 -15   6   3   25.80    5.10
 -15   6   3   25.80    5.50
  14  -6  -3   55.89    7.40
 -14  -6   3   39.70    5.20
 -14  -6   3   43.50    5.20
  14   6  -3   50.79    6.70
  14   6  -3   52.99    7.80
 -14   6   3   36.30    5.50
 -14   6   3   41.20    5.20
 -13  -6   3   15.40    3.20
 -13  -6   3   16.80    3.10
  13  -6  -3   19.50    5.20
 -13   6   3   13.40    4.30
  13   6  -3   18.40    5.60
 -13   6   3   21.50    4.00
 -13   6   3   15.10    4.10
  13   6  -3   20.30    4.40
  12  -6  -3   13.50    4.50
 -12  -6   3   20.10    3.00
 -12  -6   3   23.60    3.30
 -12   6   3   19.90    4.20
 -12   6   3   18.30    4.60
  12   6  -3   21.70    3.80
 -12   6   3   23.60    3.80
  12   6  -3   15.80    5.00
  11  -6  -3    4.50    3.30
  11  -6  -3    2.20    2.80
 -11  -6   3   -0.60    2.10
 -11  -6   3    1.00    1.90
  11  -6  -3    3.10    3.80
 -11   6   3   -4.40    2.50
 -11   6   3    8.40    2.70
  11   6  -3   -0.40    3.60
  11   6  -3    2.50    2.90
 -11   6   3    2.90    2.90
 -11   6   3    5.30    3.00
 -10  -6   3   27.20    3.20
 -10  -6   3   26.10    3.10
  10  -6  -3   30.00    3.70
  10  -6  -3   29.70    4.80
  10  -6  -3   28.50    3.80
  10   6  -3   30.60    5.00
 -10   6   3   27.30    3.80
 -10   6   3   34.00    3.70
 -10   6   3   28.90    3.90
   9  -6  -3  313.77   11.00
   9  -6  -3  322.57   12.40
  -9  -6   3  303.87    9.80
   9  -6  -3  302.17   10.70
  -9  -6   3  316.07   10.00
   9   6  -3  315.97   12.30
  -9   6   3  308.67   11.40
  -9   6   3  311.67   10.50
  -9   6   3  310.77   11.50
  -9   6   3  302.77   10.40
   9   6  -3  309.17   11.30
   8  -6  -3    5.70    3.30
  -8  -6   3   12.70    2.90
  -8  -6   3    9.00    1.70
   8  -6  -3    8.90    2.30
  -8  -6   3    8.40    1.60
   8  -6  -3    5.80    2.20
   8   6  -3   11.80    3.40
  -8   6   3    9.30    2.70
  -8   6   3    5.70    1.90
   8   6  -3    9.50    2.60
  -8   6   3    7.20    2.50
  -7  -6   3    1.10    1.40
   7  -6  -3    1.90    1.90
   7  -6  -3    2.80    1.70
  -7  -6   3   -0.30    2.10
  -7  -6   3    0.70    1.10
  -7  -6   3    0.20    1.00
   7  -6  -3   -2.70    2.30
   7   6  -3    0.80    1.50
  -7   6   3    0.20    1.90
  -7   6   3   -1.60    2.30
   7   6  -3    0.50    1.80
  -7   6   3   -0.90    1.20
   7   6  -3    2.30    2.80
  -7   6   3    1.30    2.00
  -7   6   3    0.20    1.50
   6  -6  -3   80.59    4.20
  -6  -6   3   75.69    4.70
  -6  -6   3   89.29    3.40
  -6  -6   3   79.39    3.10
  -6  -6   3   84.29    3.40
   6  -6  -3   82.59    5.60
  -6  -6   3   78.39    3.80
   6  -6  -3   83.09    4.40
  -6   6   3   83.69    4.80
   6   6  -3   83.29    3.40
  -6   6   3   87.59    4.10
   6   6  -3   85.49    5.50
  -6   6   3   82.69    5.00
  -6   6   3   77.19    5.10
  -6   6   3   80.29    3.90
   6   6  -3   80.99    4.80
   6   6  -3   82.99    3.60
  -5  -6   3  430.66   13.00
   5  -6  -3  402.76   12.20
  -5  -6   3  458.35   12.50
   5  -6  -3  362.06   13.80
  -5  -6   3  408.86   13.30
  -5  -6   3  403.56   11.40
  -5  -6   3  440.26   11.30
   5  -6  -3  374.76   13.50
  -5  -6   3  397.46   11.10
   5  -6  -3  396.56   13.70
   5  -6  -3  386.36   12.30
  -5  -6   3  425.16   13.90
  -5   6   3  382.36   12.20
  -5   6   3  399.86   12.90
  -5   6   3  376.66   13.10
  -5   6   3  401.36   12.40
   5   6  -3  461.45   13.30
  -5   6   3  387.86   12.10
  -5   6   3  396.16   11.90
   5   6  -3  476.15   11.50
   5   6  -3  459.75   13.80
  -5   6   3  388.76   13.20
  -4  -6   3   64.99    4.20
   4  -6  -3   55.09    4.70
  -4  -6   3   67.89    2.20
  -4  -6   3   66.79    3.70
   4  -6  -3   60.19    3.30
  -4  -6   3   58.89    2.40
  -4  -6   3   60.79    3.90
   4  -6  -3   54.99    4.50
   4  -6  -3   60.89    3.20
  -4  -6   3   66.09    4.70
   4  -6  -3   54.79    4.50
  -4   6   3   54.39    4.00
  -4   6   3   57.59    3.60
  -4   6   3   57.79    3.30
  -4   6   3   58.99    3.20
  -4   6   3   58.59    3.00
  -4   6   3   62.39    3.10
   4   6  -3   70.69    4.60
  -4   6   3   55.99    4.10
   4   6  -3   73.99    4.10
   4   6  -3   64.89    2.50
   3  -6  -3   27.50    2.20
  -3  -6   3   32.20    3.00
   3  -6  -3   26.10    2.10
  -3  -6   3   26.80    3.00
   3  -6  -3   29.00    3.40
   3  -6  -3   28.80    3.00
   3  -6  -3   29.90    3.80
   3  -6  -3   25.10    3.30
  -3  -6   3   27.60    3.20
  -3  -6   3   30.30    3.70
  -3   6   3   22.50    2.10
  -3   6   3   29.60    3.10
   3   6  -3   29.90    3.40
  -3   6   3   25.30    3.10
   3   6  -3   24.10    2.80
  -3   6   3   28.20    2.10
  -3   6   3   26.00    2.40
  -3   6   3   27.80    2.00
  -3   6   3   25.20    2.60
   2  -6  -3   30.00    3.50
  -2  -6   3   28.30    3.00
  -2  -6   3   23.40    2.30
  -2  -6   3   27.30    2.80
  -2  -6   3   29.80    2.90
   2  -6  -3   26.60    3.30
   2  -6  -3   29.20    3.80
  -2  -6   3   30.30    3.60
   2  -6  -3   32.00    3.10
   2   6  -3   24.70    2.80
  -2   6   3   29.20    3.70
  -2   6   3   27.80    3.20
   2   6  -3   28.00    2.80
  -2   6   3   33.30    3.00
  -2   6   3   29.00    2.20
  -2   6   3   33.90    2.20
  -2   6   3   33.20    2.10
   2   6  -3   27.60    3.20
   2   6  -3   28.90    3.20
  -2   6   3   30.40    2.50
  -2   6   3   30.10    1.90
   1  -6  -3  171.38    7.20
  -1  -6   3  175.58    6.40
   1  -6  -3  172.38    7.60
  -1  -6   3  170.98    7.10
  -1  -6   3  166.38    6.40
   1  -6  -3  171.18    6.00
   1  -6  -3  168.48    6.70
  -1  -6   3  167.18    6.00
   1  -6  -3  169.78    7.00
  -1  -6   3  173.28    6.60
  -1   6   3  173.18    6.90
   1   6  -3  173.18    6.80
  -1   6   3  158.68    7.30
  -1   6   3  174.98    5.40
   1   6  -3  164.78    6.30
   1   6  -3  170.28    7.00
   1   6  -3  164.58    6.60
  -1   6   3  175.68    5.70
  -1   6   3  170.18    5.90
  -1   6   3  174.38    5.60
  -1   6   3  176.98    5.50
   0  -6   3   10.70    2.10
   0  -6  -3   13.90    2.50
   0  -6   3   10.10    1.80
   0  -6  -3    8.80    2.00
   0  -6  -3    9.00    2.70
   0  -6  -3   11.80    2.50
   0  -6  -3    9.60    1.30
   0  -6   3    5.00    1.90
   0  -6   3   10.50    1.70
   0  -6   3   13.30    2.50
   0  -6  -3   10.60    1.40
   0  -6  -3   11.90    1.60
   0   6  -3   10.20    2.00
   0   6   3   15.80    2.90
   0   6  -3   14.30    2.40
   0   6   3    9.30    1.30
   0   6   3   10.60    1.40
   0   6  -3   11.40    1.80
   0   6   3   11.80    1.40
   0   6   3   12.40    1.60
   0   6   3   15.90    2.40
   0   6   3   12.70    1.60
   1  -6   3   82.89    4.90
  -1  -6  -3   89.49    5.10
  -1  -6  -3   84.99    5.70
  -1  -6  -3   88.39    3.50
  -1  -6  -3   86.89    3.60
   1  -6   3   79.39    4.60
   1  -6   3   86.79    4.60
   1  -6   3   86.19    4.00
  -1  -6  -3   82.89    4.50
  -1  -6  -3   85.19    4.80
   1  -6   3   85.49    2.80
  -1  -6  -3   87.79    3.50
   1  -6   3   88.09    4.00
   1   6   3   84.19    5.30
  -1   6  -3   83.99    2.90
   1   6   3   87.49    3.60
  -1   6  -3   87.09    4.00
  -1   6  -3   81.59    4.50
   1   6   3   84.59    3.20
   1   6   3   85.89    3.50
   1   6   3   87.99    3.70
   1   6   3   80.89    3.30
   1   6   3   88.09    4.60
  -2  -6  -3    2.80    2.80
   2  -6   3    0.80    1.90
   2  -6   3   -0.50    1.90
   2  -6   3    1.20    0.70
  -2  -6  -3    0.60    1.20
   2  -6   3    1.90    1.40
   2  -6   3    2.20    2.20
  -2  -6  -3    1.30    1.60
  -2  -6  -3    2.50    1.10
  -2  -6  -3    1.30    1.90
   2  -6   3    1.80    1.30
   2   6   3    1.10    1.10
   2   6   3    0.70    1.00
  -2   6  -3    0.50    0.70
  -2   6  -3   -1.20    1.50
   2   6   3   -1.30    2.40
   2   6   3    0.20    1.10
   2   6   3    0.10    0.90
   2   6   3   -0.10    1.60
  -3  -6  -3   75.39    4.70
  -3  -6  -3   75.09    3.50
  -3  -6  -3   78.29    3.60
   3  -6   3   68.59    4.90
   3  -6   3   72.59    3.10
   3  -6   3   73.19    3.00
  -3  -6  -3   64.29    3.60
  -3  -6  -3   73.49    5.80
   3  -6   3   71.69    3.80
   3  -6   3   64.49    4.50
  -3  -6  -3   67.99    4.40
   3  -6   3   64.59    4.50
   3  -6   3   79.89    3.50
   3   6   3   82.99    3.40
   3   6   3   73.39    5.50
  -3   6  -3   70.19    3.50
  -3   6  -3   76.09    3.20
   3   6   3   70.89    3.20
  -3   6  -3   78.29    3.10
   3   6   3   77.59    4.20
  -3   6  -3   82.89    4.60
   4  -6   3    3.00    1.70
  -4  -6  -3    2.00    1.30
   4  -6   3    3.50    1.30
  -4  -6  -3    1.40    1.40
   4  -6   3    2.00    1.20
   4  -6   3    2.40    1.20
   4  -6   3    5.30    2.70
   4   6   3    3.70    1.40
  -4   6  -3    5.30    2.10
  -4   6  -3    1.00    1.40
   4   6   3    2.10    1.70
  -4   6  -3    1.90    1.20
   4   6   3   -2.90    2.50
  -4   6  -3    0.20    1.10
   5  -6   3   35.30    2.40
   5  -6   3   32.90    2.70
  -5  -6  -3   33.20    2.80
  -5  -6  -3   33.30    2.90
  -5  -6  -3   31.70    2.40
   5  -6   3   35.30    2.70
   5  -6   3   31.70    3.20
  -5   6  -3   37.90    3.90
   5   6   3   32.20    2.80
  -5   6  -3   31.30    2.60
   5   6   3   32.40    3.10
  -5   6  -3   36.80    3.10
  -5   6  -3   31.20    2.70
   5   6   3   26.00    4.20
  -6  -6  -3   16.60    2.30
   6  -6   3   18.40    2.70
   6  -6   3   18.50    2.30
  -6  -6  -3   18.80    2.30
  -6  -6  -3   24.10    2.90
   6  -6   3   14.70    2.10
   6  -6   3   17.70    1.90
  -6   6  -3   17.70    2.50
   6   6   3   20.10    2.80
   6   6   3   14.90    3.00
  -6   6  -3   14.40    2.10
  -6   6  -3   21.10    3.20
   6   6   3   23.60    4.60
   7  -6   3    2.90    2.30
  -7  -6  -3    2.30    1.70
   7  -6   3    2.40    1.10
  -7  -6  -3    6.70    2.10
   7  -6   3    4.90    2.50
   7  -6   3    4.70    2.00
  -7  -6  -3    5.40    1.90
   7   6   3    5.60    2.00
  -7   6  -3    4.80    2.40
   7   6   3    7.40    3.60
   7   6   3    1.70    2.60
  -7   6  -3    1.70    2.50
  -7   6  -3    0.80    1.90
  -7   6  -3    0.00    1.70
  -8  -6  -3  153.28    6.60
   8  -6   3  150.48    6.60
  -8  -6  -3  150.28    6.80
  -8  -6  -3  143.89    6.00
   8  -6   3  150.78    7.10
   8  -6   3  146.79    6.70
   8   6   3  147.99    5.80
  -8   6  -3  141.69    7.10
   8   6   3  134.59    9.00
   8   6   3  152.98    7.70
  -8   6  -3  157.18    6.60
  -8   6  -3  135.49    7.60
   9  -6   3   59.59    5.00
  -9  -6  -3   59.59    4.40
  -9  -6  -3   57.09    4.70
  -9  -6  -3   58.39    4.60
   9  -6   3   59.19    5.00
   9  -6   3   55.39    5.30
   9   6   3   57.39    7.00
  -9   6  -3   58.19    4.90
   9   6   3   65.19    3.60
  -9   6  -3   66.49    5.80
  -9   6  -3   57.69    4.80
  -9   6  -3   53.89    5.70
 -10  -6  -3   75.69    5.60
  10  -6   3   75.79    6.40
 -10  -6  -3   79.69    5.80
 -10   6  -3   85.69    6.70
  10   6   3   77.69    3.90
  10   6   3   86.79    6.70
  10   6   3   87.09    8.40
 -10   6  -3   91.49    6.10
 -11  -6  -3    1.20    2.90
 -11  -6  -3    0.90    2.80
  11  -6   3    2.20    3.60
  11   6   3   -2.80    5.20
  11   6   3    5.20    3.80
 -11   6  -3   12.60    3.90
 -11   6  -3    8.50    3.50
  12  -6   3   20.90    4.60
 -12  -6  -3   23.00    4.20
 -12  -6  -3   19.70    3.90
 -12   6  -3   20.50    4.50
 -12   6  -3   21.30    4.80
  12   6   3   28.00    6.50
  12   6   3   25.00    4.90
 -13  -6  -3   20.00    4.30
 -13  -6  -3   20.30    4.30
  13   6   3   26.70    6.80
  13   6   3   12.00    5.00
 -13   6  -3   11.70    7.40
 -13   6  -3   13.30    4.90
 -14  -6  -3   52.79    6.80
 -14  -6  -3   38.90    5.80
  14   6   3   70.19   10.30
 -14   6  -3   43.20    6.40
 -15  -7   3   14.10    4.00
 -15  -7   3    9.40    4.00
  15  -7  -3    7.80    6.10
 -15   7   3   20.30    5.90
  15   7  -3   15.90    7.30
  15   7  -3   10.90    5.00
 -14  -7   3    0.10    2.90
 -14  -7   3    1.80    3.20
  14  -7  -3    4.90    5.60
 -14   7   3    4.40    4.20
  14   7  -3    1.70    6.40
 -14   7   3   -4.60    4.30
  14   7  -3    0.30    4.10
 -13  -7   3    4.60    2.70
 -13  -7   3   -4.10    2.70
  13  -7  -3   -0.20    5.20
 -13   7   3    1.90    4.20
 -13   7   3    5.30    3.80
 -13   7   3    3.50    4.30
  13   7  -3    0.50    3.80
  13   7  -3    2.00    5.40
 -12  -7   3   40.90    4.40
 -12  -7   3   36.80    3.90
  12  -7  -3   49.30    6.30
 -12   7   3   43.20    5.60
 -12   7   3   49.20    6.30
 -12   7   3   39.90    4.90
  12   7  -3   43.00    5.60
  12   7  -3   45.70    6.40
 -11  -7   3   95.29    5.20
  11  -7  -3   92.99    8.10
 -11  -7   3  102.79    5.40
  11   7  -3   91.69    6.90
 -11   7   3   89.79    6.20
 -11   7   3   89.39    6.90
 -11   7   3   88.29    6.70
  11   7  -3  103.49    8.00
  10  -7  -3  283.17   12.40
 -10  -7   3  286.17    9.50
 -10  -7   3  284.87    9.70
  10  -7  -3  286.97   11.90
  10  -7  -3  277.97   11.60
  10   7  -3  288.37   11.50
 -10   7   3  286.47   11.40
 -10   7   3  293.77   11.50
 -10   7   3  288.37   10.50
  10   7  -3  273.07   12.60
   9  -7  -3  213.78    8.70
   9  -7  -3  216.78    8.70
   9  -7  -3  206.98   10.30
  -9  -7   3  216.88    7.30
  -9  -7   3  205.28    7.40
   9   7  -3  210.68   10.20
   9   7  -3  206.88    9.20
  -9   7   3  214.28    8.20
   8  -7  -3  340.07   13.10
  -8  -7   3  346.27   10.10
  -8  -7   3  316.57   10.50
  -8  -7   3  330.97   10.30
   8  -7  -3  342.77   11.30
   8  -7  -3  329.77   11.40
  -8   7   3  346.87   10.90
   8   7  -3  316.27   12.70
   8   7  -3  339.67   13.00
  -8   7   3  329.77   11.00
  -8   7   3  336.07   12.10
  -8   7   3  329.47   12.20
   7  -7  -3  300.37   10.10
   7  -7  -3  307.37   12.00
   7  -7  -3  292.27   10.20
  -7  -7   3  302.77    9.00
  -7  -7   3  300.57    8.90
  -7  -7   3  303.87    8.80
  -7  -7   3  293.27    9.70
  -7   7   3  309.47   11.00
  -7   7   3  283.17   11.10
   7   7  -3  306.07   11.80
  -7   7   3  296.97   10.60
   7   7  -3  301.87   11.20
  -7   7   3  293.77    9.60
   7   7  -3  288.47    9.30
  -6  -7   3  433.86   11.50
   6  -7  -3  430.66   13.10
   6  -7  -3  388.46   13.30
   6  -7  -3  431.66   14.80
  -6  -7   3  426.16   13.00
  -6  -7   3  393.06   13.50
  -6  -7   3  417.66   11.90
  -6  -7   3  419.76   15.30
   6  -7  -3  427.56   12.90
  -6   7   3  424.06   14.20
  -6   7   3  427.36   12.80
   6   7  -3  425.16   12.10
  -6   7   3  426.76   12.50
   6   7  -3  427.46   14.00
  -6   7   3  415.96   13.70
   6   7  -3  428.46   14.50
  -5  -7   3   81.49    2.90
  -5  -7   3   86.79    4.50
  -5  -7   3   84.59    6.40
  -5  -7   3   81.39    5.00
   5  -7  -3   82.79    4.10
   5  -7  -3   80.59    4.20
   5  -7  -3   82.99    6.10
   5  -7  -3   71.69    4.80
  -5   7   3   78.79    3.70
  -5   7   3   80.79    4.40
  -5   7   3   80.99    5.30
  -5   7   3   80.89    4.90
   5   7  -3   89.09    3.40
  -5   7   3   69.29    5.20
   5   7  -3   95.39    5.90
  -5   7   3   79.49    3.90
   5   7  -3   93.99    5.30
  -4  -7   3   31.10    3.70
   4  -7  -3   27.30    3.20
   4  -7  -3   29.40    2.70
   4  -7  -3   26.50    2.40
   4  -7  -3   26.50    3.80
  -4  -7   3   30.40    4.10
  -4  -7   3   25.00    3.30
  -4   7   3   26.50    2.20
   4   7  -3   25.60    3.50
  -4   7   3   27.50    2.50
  -4   7   3   24.70    2.90
  -4   7   3   25.00    3.10
  -4   7   3   23.70    2.80
   4   7  -3   30.80    4.10
  -4   7   3   28.10    3.70
   3  -7  -3   26.60    3.30
  -3  -7   3   31.00    3.40
   3  -7  -3   24.00    2.30
  -3  -7   3   21.40    3.60
  -3  -7   3   27.00    3.20
  -3  -7   3   26.50    3.40
  -3  -7   3   21.10    3.00
   3  -7  -3   25.40    3.60
   3   7  -3   28.50    3.40
  -3   7   3   24.70    2.20
  -3   7   3   20.20    2.50
   3   7  -3   24.00    3.10
  -3   7   3   23.70    2.10
  -3   7   3   24.30    2.70
  -3   7   3   26.40    3.50
  -3   7   3   18.40    3.00
   3   7  -3   26.50    3.70
  -3   7   3   25.80    2.20
   2  -7  -3    1.00    2.30
   2  -7  -3    2.20    1.80
   2  -7  -3    2.30    2.10
  -2  -7   3   -0.10    2.00
  -2  -7   3    1.20    1.90
  -2  -7   3    1.10    2.00
  -2  -7   3    3.10    1.70
  -2  -7   3    3.00    2.70
  -2   7   3   -1.00    2.60
   2   7  -3    0.90    1.90
  -2   7   3    0.60    2.00
  -2   7   3    2.60    1.10
   2   7  -3    1.60    2.20
   2   7  -3    0.20    1.80
  -2   7   3    3.20    1.40
  -2   7   3    2.60    1.10
  -2   7   3    0.80    1.20
   2   7  -3   -3.10    2.00
  -2   7   3   -1.00    1.50
  -1  -7   3   14.10    2.50
  -1  -7   3   12.50    2.10
  -1  -7   3   13.80    3.00
  -1  -7   3   12.70    2.70
   1  -7  -3   11.80    2.50
  -1  -7   3   16.70    2.60
   1  -7  -3   18.90    3.40
   1  -7  -3   14.10    2.10
   1  -7  -3   10.00    2.60
  -1   7   3   17.10    2.00
   1   7  -3   19.80    3.40
   1   7  -3   12.80    2.60
   1   7  -3   13.60    2.70
  -1   7   3   12.20    1.60
  -1   7   3   15.40    2.10
  -1   7   3   13.00    1.50
  -1   7   3   11.70    3.00
  -1   7   3   14.20    2.70
   1   7  -3   14.60    2.50
   0  -7   3  162.38    6.40
   0  -7   3  157.78    7.30
   0  -7  -3  151.78    5.30
   0  -7   3  154.88    6.10
   0  -7   3  150.28    6.90
   0  -7  -3  150.08    7.30
   0  -7  -3  162.88    7.20
   0  -7  -3  162.18    5.80
   0  -7   3  149.69    6.70
   0   7   3  155.68    4.90
   0   7   3  157.58    5.10
   0   7   3  151.18    5.20
   0   7  -3  153.18    6.30
   0   7   3  156.68    7.70
   0   7  -3  152.08    6.80
   0   7   3  151.78    6.70
   0   7  -3  162.58    6.90
   0   7   3  155.18    5.80
   1  -7   3  231.18    7.90
  -1  -7  -3  224.28    8.90
   1  -7   3  214.88    9.00
   1  -7   3  219.28    7.90
  -1  -7  -3  222.58    7.40
  -1  -7  -3  223.68    7.10
  -1  -7  -3  225.78    9.10
  -1  -7  -3  224.68    6.80
   1   7   3  221.28    8.40
   1   7   3  220.48    6.90
   1   7   3  228.88    7.60
  -1   7  -3  234.28    8.70
   1   7   3  226.58    9.70
   1   7   3  213.28    6.70
  -1   7  -3  224.78    6.30
   1   7   3  224.58    7.20
   1   7   3  222.28    6.90
  -2  -7  -3   20.60    2.20
   2  -7   3   25.80    2.90
  -2  -7  -3   21.20    2.40
  -2  -7  -3   22.60    3.40
  -2  -7  -3   21.30    2.30
   2  -7   3   19.90    1.60
   2  -7   3   21.20    3.50
   2  -7   3   21.80    2.70
   2   7   3   21.30    3.80
  -2   7  -3   20.60    1.70
   2   7   3   20.70    2.10
   2   7   3   23.30    2.40
  -2   7  -3   20.20    3.00
   2   7   3   27.20    3.30
   3  -7   3  131.49    4.30
  -3  -7  -3  135.59    6.70
  -3  -7  -3  129.59    4.90
   3  -7   3  126.49    4.50
  -3  -7  -3  132.79    5.10
   3  -7   3  135.39    5.40
  -3  -7  -3  132.79    4.90
   3  -7   3  126.89    5.70
   3   7   3  127.99    4.90
   3   7   3  135.19    6.10
   3   7   3  128.99    4.90
   3   7   3  124.69    7.20
   3   7   3  129.89    5.10
  -3   7  -3  132.09    6.40
  -3   7  -3  133.79    4.40
  -4  -7  -3   35.90    3.00
   4  -7   3   33.50    2.50
  -4  -7  -3   43.40    3.00
  -4  -7  -3   37.50    2.60
   4  -7   3   41.90    3.10
  -4  -7  -3   38.90    4.20
   4  -7   3   41.00    3.60
  -4   7  -3   30.70    2.50
  -4   7  -3   34.90    2.60
   4   7   3   37.70    2.90
  -4   7  -3   47.90    4.30
   4   7   3   38.30    3.70
  -4   7  -3   33.30    3.30
   4   7   3   34.30    5.10
   5  -7   3   90.49    4.10
  -5  -7  -3   87.49    4.40
   5  -7   3   84.69    4.20
  -5  -7  -3   85.19    4.30
  -5  -7  -3   86.69    3.80
   5  -7   3   79.89    4.00
   5  -7   3   85.79    4.90
   5   7   3   85.99    4.80
  -5   7  -3   83.09    4.50
  -5   7  -3   84.09    4.10
  -5   7  -3   87.59    4.00
   5   7   3   95.39    6.90
  -5   7  -3   87.39    5.70
   6  -7   3  201.98    7.00
   6  -7   3  189.88    6.40
  -6  -7  -3  189.08    6.60
   6  -7   3  194.68    7.80
  -6  -7  -3  186.68    7.20
  -6  -7  -3  198.18    7.20
   6  -7   3  190.68    7.10
  -6   7  -3  195.98    7.50
   6   7   3  180.88    9.90
   6   7   3  191.98    7.40
  -6   7  -3  187.28    7.00
  -6   7  -3  191.48    6.90
  -6   7  -3  185.08    8.80
   7  -7   3  252.47    7.90
   7  -7   3  253.67    9.70
   7  -7   3  261.17    9.10
   7  -7   3  262.97    9.10
  -7  -7  -3  252.37    9.10
  -7  -7  -3  258.87    8.40
  -7  -7  -3  282.87    9.30
  -7   7  -3  251.77    9.40
  -7   7  -3  265.57   10.70
   7   7   3  258.77    9.10
  -7   7  -3  260.77    9.00
  -7   7  -3  261.27    9.10
   7   7   3  262.17   12.00
  -8  -7  -3    7.80    2.30
  -8  -7  -3    8.50    4.10
   8  -7   3   10.10    2.70
  -8  -7  -3    8.50    2.30
   8  -7   3    3.10    2.80
  -8   7  -3   14.20    3.20
   8   7   3   10.70    2.50
  -8   7  -3   11.60    3.30
   8   7   3   10.50    4.80
  -8   7  -3   13.00    2.60
  -9  -7  -3   37.50    4.40
   9  -7   3   39.00    5.50
  -9  -7  -3   40.70    4.60
   9   7   3   35.70    3.40
  -9   7  -3   32.00    5.10
  -9   7  -3   38.40    4.50
   9   7   3   31.70    6.20
 -10  -7  -3   94.79    6.40
  10  -7   3   91.49    7.00
 -10  -7  -3   93.49    6.30
 -10   7  -3   99.79    7.50
  10   7   3  104.79    9.30
 -10   7  -3   86.69    6.50
 -11  -7  -3   36.00    4.40
  11  -7   3   49.40    6.50
 -11  -7  -3   28.90    4.10
  11   7   3   34.00    7.30
 -11   7  -3   37.20    8.00
 -11   7  -3   42.60    5.80
 -12  -7  -3   16.40    3.90
  12  -7   3   15.30    4.80
 -12  -7  -3   20.20    4.30
  12   7   3   19.40    7.20
 -12   7  -3   18.50    5.10
 -13  -7  -3    3.20    3.90
 -13  -7  -3   11.00    4.20
  13   7   3   23.30    8.10
 -13   7  -3   14.20    5.60
  14  -8  -3    9.50    6.60
 -14  -8   3   11.70    3.70
 -14  -8   3    6.00    3.60
  14   8  -3    3.70    6.70
 -14   8   3   -1.90    5.30
  14   8  -3   -0.90    4.70
 -13  -8   3   22.10    3.60
 -13  -8   3   19.70    3.60
  13  -8  -3   15.90    6.00
  13   8  -3   25.50    5.60
 -13   8   3   18.70    5.30
  13   8  -3   19.90    6.60
 -13   8   3   22.30    5.20
 -12  -8   3   -0.30    2.40
  12  -8  -3    6.60    5.20
 -12  -8   3    3.50    2.60
 -12   8   3    2.90    4.20
  12   8  -3    1.50    3.80
  12   8  -3    2.70    5.30
 -12   8   3   -5.80    3.90
  11  -8  -3   -0.50    4.50
 -11  -8   3    0.40    2.10
 -11  -8   3   -1.80    2.10
  11   8  -3   -2.70    4.40
 -11   8   3   -1.30    3.70
  11   8  -3   -2.90    3.80
 -11   8   3   -1.20    3.70
 -11   8   3    4.50    4.00
  10  -8  -3  113.99    8.80
 -10  -8   3  113.39    5.20
 -10  -8   3  106.79    5.50
 -10   8   3  115.19    7.90
 -10   8   3  117.39    6.40
 -10   8   3  124.69    7.80
  10   8  -3  119.19    8.00
  10   8  -3  111.89    8.70
  -9  -8   3   23.00    2.60
  -9  -8   3   26.70    2.90
   9  -8  -3   26.30    6.30
   9   8  -3   18.00    4.00
  -9   8   3   29.90    4.50
  -9   8   3   24.60    3.30
  -9   8   3   26.30    4.30
   9   8  -3   29.60    5.20
  -8  -8   3    2.00    1.40
   8  -8  -3    2.90    3.80
  -8  -8   3   -0.70    1.40
  -8  -8   3   -0.80    2.70
  -8  -8   3   -0.70    1.50
   8  -8  -3   -0.80    2.60
   8  -8  -3    4.10    2.60
   8   8  -3   -3.10    3.50
  -8   8   3    1.80    2.10
  -8   8   3    2.10    2.90
   8   8  -3   -0.30    2.90
  -8   8   3    4.50    2.90
  -7  -8   3  213.48    6.80
   7  -8  -3  214.68    8.20
  -7  -8   3  220.48    8.30
   7  -8  -3  223.68   10.20
   7  -8  -3  212.18    8.30
   7   8  -3  212.08    9.40
  -7   8   3  210.78    9.40
   7   8  -3  210.28    9.90
  -7   8   3  211.38    7.60
  -7   8   3  223.38    9.30
   7   8  -3  228.98    7.90
  -7   8   3  221.08    7.90
   6  -8  -3  205.88    7.40
  -6  -8   3  204.08    6.20
   6  -8  -3  210.08   10.10
  -6  -8   3  204.38    8.10
   6  -8  -3  206.38    7.80
  -6   8   3  206.78    7.40
  -6   8   3  211.78    7.20
   6   8  -3  212.28    6.70
   6   8  -3  187.68    9.90
   6   8  -3  219.48    9.70
  -6   8   3  210.98    8.60
   5  -8  -3   -0.10    1.60
   5  -8  -3    3.00    2.20
  -5  -8   3   11.00    2.60
   5  -8  -3    8.10    3.40
  -5   8   3    2.60    1.50
  -5   8   3    6.30    2.60
   5   8  -3    2.60    3.40
   5   8  -3    3.60    2.60
  -5   8   3    3.00    2.70
  -5   8   3    2.60    1.60
  -4  -8   3  651.23   20.40
   4  -8  -3  692.13   19.40
   4  -8  -3  707.43   21.80
  -4  -8   3  691.83   20.60
  -4   8   3  654.63   19.40
  -4   8   3  711.63   20.50
   4   8  -3  694.63   21.70
   4   8  -3  714.43   21.10
  -4   8   3  693.83   21.30
  -4   8   3  686.63   19.20
  -4   8   3  666.93   18.80
  -3  -8   3  316.97   10.70
  -3  -8   3  295.07   10.80
   3  -8  -3  302.87   11.80
  -3   8   3  297.27    9.40
  -3   8   3  334.57   10.80
   3   8  -3  293.57   10.90
  -3   8   3  300.37   10.40
  -3   8   3  301.17   11.20
   3   8  -3  293.17   11.70
  -3   8   3  303.57    8.90
   2  -8  -3   23.90    4.10
  -2  -8   3   24.90    3.10
  -2   8   3   26.60    3.60
  -2   8   3   21.80    3.90
   2   8  -3   21.50    3.20
  -2   8   3   19.80    2.50
  -2   8   3   20.90    2.00
  -2   8   3   29.80    3.20
   2   8  -3   23.30    4.10
   2   8  -3   23.10    3.50
   1  -8  -3   43.40    3.80
   1  -8  -3   49.20    5.10
  -1  -8   3   54.39    4.10
   1   8  -3   52.99    4.40
   1   8  -3   41.60    4.60
  -1   8   3   44.30    2.80
  -1   8   3   50.79    2.40
  -1   8   3   53.69    3.80
  -1   8   3   43.50    5.20
  -1   8   3   42.20    4.50
   1   8  -3   51.79    4.90
   0  -8   3   13.60    2.60
   0  -8  -3   10.20    3.30
   0  -8   3   15.20    3.00
   0  -8  -3   16.60    2.40
   0   8  -3    8.90    2.90
   0   8   3   14.80    1.40
   0   8   3   17.70    3.20
   0   8   3   13.30    2.40
   0   8   3    9.80    3.30
   0   8  -3   10.70    3.00
   0   8   3   15.50    2.00
  -1  -8  -3  157.68    5.60
  -1  -8  -3  161.78    6.30
  -1  -8  -3  157.48    7.90
   1  -8   3  161.08    6.80
   1  -8   3  163.78    6.90
   1   8   3  165.08    7.30
   1   8   3  161.38    5.50
   1   8   3  162.68    5.20
   1   8   3  164.48    8.60
  -1   8  -3  172.88    7.70
  -2  -8  -3  241.98    8.30
   2  -8   3  258.37    7.10
   2  -8   3  243.48    8.90
  -2  -8  -3  246.68    8.00
  -2  -8  -3  237.68   10.10
   2  -8   3  250.87    9.20
   2   8   3  271.77    9.70
  -2   8  -3  255.77    9.90
   2   8   3  240.08    7.60
   2   8   3  254.57   11.10
   2   8   3  249.68    7.80
  -2   8  -3  254.57    7.20
  -3  -8  -3  276.77    8.90
   3  -8   3  275.67    9.50
   3  -8   3  274.07    9.90
  -3  -8  -3  284.07    9.00
  -3  -8  -3  289.87   11.20
   3  -8   3  275.97    8.20
  -3  -8  -3  282.17    8.50
  -3   8  -3  281.27    8.30
   3   8   3  291.17   12.10
   3   8   3  278.57    8.70
   3   8   3  274.17    8.90
  -3   8  -3  287.37   10.90
   3   8   3  256.27    8.60
   3   8   3  288.37   10.20
   4  -8   3   54.99    3.20
  -4  -8  -3   62.69    3.60
  -4  -8  -3   66.19    3.80
   4  -8   3   62.99    4.20
   4  -8   3   57.99    2.80
   4  -8   3   54.69    4.70
  -4  -8  -3   59.39    5.60
  -4  -8  -3   63.69    3.70
   4   8   3   58.49    3.80
  -4   8  -3   56.89    3.00
   4   8   3   59.69    4.70
  -4   8  -3   58.99    5.40
   4   8   3   59.09    3.60
  -5  -8  -3    2.80    1.90
  -5  -8  -3    3.70    1.90
  -5  -8  -3   -0.50    2.80
   5  -8   3    4.90    2.70
   5  -8   3    1.40    1.50
   5  -8   3    3.80    2.10
   5  -8   3    2.90    1.60
  -5  -8  -3    1.40    1.70
  -5   8  -3   -0.60    2.50
   5   8   3    2.40    4.00
   5   8   3    4.50    2.50
  -5   8  -3    0.60    1.60
  -5   8  -3    4.50    1.60
  -5   8  -3    4.80    2.30
   6  -8   3  148.39    5.90
  -6  -8  -3  160.98    6.40
  -6  -8  -3  153.48    8.30
   6  -8   3  150.78    7.20
  -6  -8  -3  149.69    5.80
   6  -8   3  147.89    6.00
  -6  -8  -3  152.68    6.30
   6   8   3  173.08    9.80
   6   8   3  148.99    6.80
  -6   8  -3  137.79    6.10
  -6   8  -3  154.58    8.10
  -6   8  -3  145.69    6.70
   7  -8   3   16.20    3.50
  -7  -8  -3   20.60    2.90
   7  -8   3   20.20    2.90
  -7  -8  -3   18.30    2.70
  -7   8  -3   19.50    3.70
  -7   8  -3   15.40    4.30
   7   8   3   26.70    3.30
   7   8   3   25.20    5.60
  -8  -8  -3   26.40    3.30
   8  -8   3   24.70    4.10
  -8  -8  -3   33.80    4.20
   8   8   3   17.00    5.60
  -8   8  -3   28.10    4.70
   8   8   3   25.30    3.30
  -9  -8  -3   76.29    5.50
  -9  -8  -3   77.39    5.70
   9  -8   3   67.69    6.50
   9   8   3   83.69    9.10
  -9   8  -3   69.49    6.90
 -10  -8  -3   30.00    4.00
  10  -8   3   30.80    5.00
 -10  -8  -3   32.20    4.30
 -10   8  -3   32.50    5.30
  10   8   3   39.20    7.30
 -11  -8  -3    8.80    3.80
 -11  -8  -3    9.00    3.30
  11  -8   3   13.90    6.40
 -11   8  -3   13.00    4.80
  11   8   3   13.20    6.80
 -12  -8  -3    5.70    3.60
 -12  -8  -3    0.20    3.90
  12   8   3    2.80    7.40
 -12   8  -3    8.10    5.20
 -13  -9   3   11.70    3.40
  13  -9  -3   11.60    6.60
 -13  -9   3   12.60    3.40
 -13   9   3   12.20    5.60
  13   9  -3   11.50    7.10
  13   9  -3   19.80    6.20
 -13   9   3   12.20    6.00
 -12  -9   3   55.69    5.00
  12  -9  -3   60.59    8.20
 -12  -9   3   56.89    5.10
  12   9  -3   50.19    6.90
 -12   9   3   60.09    8.00
 -12   9   3   55.49    7.10
  12   9  -3   69.39    9.10
 -11  -9   3    5.60    2.40
 -11  -9   3    3.10    2.30
  11  -9  -3   11.10    5.90
  11   9  -3    6.80    5.40
 -11   9   3    7.80    4.80
  11   9  -3   14.30    4.70
 -11   9   3    4.90    4.20
 -10  -9   3    0.80    2.10
 -10  -9   3   -0.50    1.80
  10  -9  -3    5.30    5.30
  10   9  -3   -4.00    5.10
 -10   9   3   -0.90    4.00
 -10   9   3    3.20    4.00
  10   9  -3   -1.30    3.80
  -9  -9   3   49.70    3.70
   9  -9  -3   70.09    8.30
   9   9  -3   66.29    7.50
   9   9  -3   64.09    6.90
  -9   9   3   55.69    6.80
  -9   9   3   53.89    6.50
  -8  -9   3    1.00    1.40
   8  -9  -3    8.00    4.40
   8   9  -3   -0.40    4.10
  -8   9   3    3.00    3.50
   8   9  -3    5.00    3.60
  -8   9   3    3.10    3.30
   7  -9  -3  125.09    6.40
  -7  -9   3  133.99    4.80
   7   9  -3  133.79    8.00
  -7   9   3  151.48    8.40
  -7   9   3  141.39    7.60
   7   9  -3  135.29    8.80
   6  -9  -3   10.30    2.40
  -6  -9   3   14.10    3.30
   6  -9  -3    9.60    2.10
[truncated: 1,044,043 more chars]
